# Supplementary material for: Expression-Based Diagnosis, Treatment Selection, and Drug Development for Breast Cancer
Source: Int J Mol Sci. 2023 Jun 23;24(13):10561. doi: 10.3390/ijms241310561 (PMC10342177; doi:10.3390/ijms241310561)
Supplement: Supplementary file 1 [file ijms-24-10561-s001.zip]

Archive with 7 entries (7 files):
- Supplementary File S1.pdf
- Supplementary FIle S2.xlsx
- Supplementary FIle S3.xlsx
- Supplementary FIle S4.xlsx
- Supplementary FIle S5.xlsx
- Supplementary FIle S6.xlsx
- Supplementary File S7.xlsx
