# Supplementary material for: Expression-Based Diagnosis, Treatment Selection, and Drug Development for Breast Cancer
Source: Int J Mol Sci. 2023 Jun 23;24(13):10561. doi: 10.3390/ijms241310561 (PMC10342177; doi:10.3390/ijms241310561)
Supplement: Supplementary file 1 [file ijms-24-10561-s001.zip › Supplementary FIle S2.xlsx]

## Sheet: TumorType18SbySample
who	Plate	Pos	RealSample#	Tumor Type	Detector		Tissue Source	Age	OriginalTNM	AJCC Cancer Stage	TNM	Metastasis	Sex	Histology	Matched SEER ICD-O group	Stage	Tumor Grade	Tumor Differentiation	Sample Type	ER/PR Status	HER2/neu Status	menopause status:		Ct	control mean	DeltaCt	avgDeltaCt	TumorTypeAvgDeltaCt	TumorTypeSTDEV	FCvsNormal	ttest
Jill	10-09-08 Samples 50-53s40-44	E10	T0426310	DCIS	18S-Hs99999901_s1	1	WVUTB	63		0		0		DCIS		0	3	Poorly differentiated						8.59981	8.64477	-0.0449603	-5.92119e-16	-9.86865e-17	6.16297e-16	1	0.830125
Jill	10-09-08 Samples 50-53s40-44	E11	T0426310	DCIS	18S-Hs99999901_s1	2	WVUTB	63		0		0		DCIS		0	3	Poorly differentiated						8.55698	8.64477	-0.0877863
Jill	10-09-08 Samples 50-53s40-44	E12	T0426310	DCIS	18S-Hs99999901_s1	3	WVUTB	63		0		0		DCIS		0	3	Poorly differentiated						8.77752	8.64477	0.132747
Jill	10-07-08 Samples 26-29s-17-20	E10	T06449	DCIS	18S-Hs99999901_s1	1	WVUTB	56		0		0		DCIS		0	3	Poorly differentiated						8.29651	8.26771	0.0288009	-2.96059e-16
Jill	10-07-08 Samples 26-29s-17-20	E11	T06449	DCIS	18S-Hs99999901_s1	2	WVUTB	56		0		0		DCIS		0	3	Poorly differentiated						7.81639	8.26771	-0.451316
Jill	10-07-08 Samples 26-29s-17-20	E12	T06449	DCIS	18S-Hs99999901_s1	3	WVUTB	56		0		0		DCIS		0	3	Poorly differentiated						8.69022	8.26771	0.422515
2 RebeccaRepeat	Br 2 LDA 11-18-09 Plate 2	E10	T09-045-003	DCIS	18S-Hs99999901_s1	1	WVUTB	39	pTis, pN1mi, pMx	0	pTis, pN1mi, pMx	0	F	DCIS		0	1	Well-Differentiated	Frozen	negative / negative	not addressed			10.4891	10.5131	-0.023947	5.92119e-16
2 RebeccaRepeat	Br 2 LDA 11-18-09 Plate 2	E11	T09-045-003	DCIS	18S-Hs99999901_s1	2	WVUTB	39	pTis, pN1mi, pMx	0	pTis, pN1mi, pMx	0	F	DCIS		0	1	Well-Differentiated	Frozen	negative / negative	not addressed			10.5036	10.5131	-0.009511
2 RebeccaRepeat	Br 2 LDA 11-18-09 Plate 2	E12	T09-045-003	DCIS	18S-Hs99999901_s1	3	WVUTB	39	pTis, pN1mi, pMx	0	pTis, pN1mi, pMx	0	F	DCIS		0	1	Well-Differentiated	Frozen	negative / negative	not addressed			10.5465	10.5131	0.033458
Jill	10-02-08 Samples 9-12	A10	1060163A9	Invasive Carcinoma	18S-Hs99999901_s1	1	CHTN	65	T2N0M0	2A	T2N0M0	0		invasive ductal carcinoma	8500/3: Infiltrating duct carcinoma, NOS	2	3	Poorly differentiated		negative/negative	intermediate: test to be repeated	Postmenopausal		9.33798	9.98487	-0.646892	1.18424e-15	-6.41462e-17	7.02493e-16	1	0.618389
Jill	10-02-08 Samples 9-12	A11	1060163A9	Invasive Carcinoma	18S-Hs99999901_s1	2	CHTN	65	T2N0M0	2A	T2N0M0	0		invasive ductal carcinoma	8500/3: Infiltrating duct carcinoma, NOS	2	3	Poorly differentiated		negative/negative	intermediate: test to be repeated	Postmenopausal		11.1865	9.98487	1.20165
Jill	10-02-08 Samples 9-12	A12	1060163A9	Invasive Carcinoma	18S-Hs99999901_s1	3	CHTN	65	T2N0M0	2A	T2N0M0	0		invasive ductal carcinoma	8500/3: Infiltrating duct carcinoma, NOS	2	3	Poorly differentiated		negative/negative	intermediate: test to be repeated	Postmenopausal		9.43011	9.98487	-0.55476
RebeccaRepeat	Br 2 LDA 9-29-09 Plate 1	A10	1060568A18	Invasive Carcinoma	18S-Hs99999901_s1	1	CHTN	50	T4, N1, M0	3B	T4, N1, M0	1	F	Invasive ductal carcinoma	8500/3: Infiltrating duct carcinoma, NOS	3	3	Poorly differentiated		positive/negative	negative			10.3255	10.3972	-0.0716697	5.92119e-16
RebeccaRepeat	Br 2 LDA 9-29-09 Plate 1	A11	1060568A18	Invasive Carcinoma	18S-Hs99999901_s1	2	CHTN	50	T4, N1, M0	3B	T4, N1, M0	1	F	Invasive ductal carcinoma	8500/3: Infiltrating duct carcinoma, NOS	3	3	Poorly differentiated		positive/negative	negative			10.3509	10.3972	-0.0462607
RebeccaRepeat	Br 2 LDA 9-29-09 Plate 1	A12	1060568A18	Invasive Carcinoma	18S-Hs99999901_s1	3	CHTN	50	T4, N1, M0	3B	T4, N1, M0	1	F	Invasive ductal carcinoma	8500/3: Infiltrating duct carcinoma, NOS	3	3	Poorly differentiated		positive/negative	negative			10.5151	10.3972	0.11793
Jill	10-06-08 Samples 18-21s-09-12	A10	1060950A1	Invasive Carcinoma	18S-Hs99999901_s1	1	CHTN	63	T1cN0M0	1A	T1cN0M0	0		infiltrating ductal carcinoma, cribriform subtype	8500/3: Infiltrating duct carcinoma, NOS	1	1	Well-differentiated		positive/positive	negative			6.25412	6.92383	-0.669702	-5.92119e-16
Jill	10-06-08 Samples 18-21s-09-12	A11	1060950A1	Invasive Carcinoma	18S-Hs99999901_s1	2	CHTN	63	T1cN0M0	1A	T1cN0M0	0		infiltrating ductal carcinoma, cribriform subtype	8500/3: Infiltrating duct carcinoma, NOS	1	1	Well-differentiated		positive/positive	negative			6.54854	6.92383	-0.375288
Jill	10-06-08 Samples 18-21s-09-12	A12	1060950A1	Invasive Carcinoma	18S-Hs99999901_s1	3	CHTN	63	T1cN0M0	1A	T1cN0M0	0		infiltrating ductal carcinoma, cribriform subtype	8500/3: Infiltrating duct carcinoma, NOS	1	1	Well-differentiated		positive/positive	negative			7.96881	6.92383	1.04499
Jill	10-06-08 Samples 13-16-s-08-09	A10	1061053A1	Invasive Carcinoma	18S-Hs99999901_s1	1	CHTN	36	T3N1aM0	3A	T3N1aM0	1		infiltrating ductal carcinoma	8500/3: Infiltrating duct carcinoma, NOS	3	2	Moderately differentiated		positive/positive	(+1) probably negative	Premenopausal		6.00433	6.34086	-0.336526	-8.88178e-16
Jill	10-06-08 Samples 13-16-s-08-09	A11	1061053A1	Invasive Carcinoma	18S-Hs99999901_s1	2	CHTN	36	T3N1aM0	3A	T3N1aM0	1		infiltrating ductal carcinoma	8500/3: Infiltrating duct carcinoma, NOS	3	2	Moderately differentiated		positive/positive	(+1) probably negative	Premenopausal		6.45385	6.34086	0.112992
Jill	10-06-08 Samples 13-16-s-08-09	A12	1061053A1	Invasive Carcinoma	18S-Hs99999901_s1	3	CHTN	36	T3N1aM0	3A	T3N1aM0	1		infiltrating ductal carcinoma	8500/3: Infiltrating duct carcinoma, NOS	3	2	Moderately differentiated		positive/positive	(+1) probably negative	Premenopausal		6.5644	6.34086	0.223535
RebeccaRepeat	Br 2 LDA 9-28-09 Plate 1	A11	1061562A15	Invasive Carcinoma	18S-Hs99999901_s1	1	CHTN	60	T2, N0, M0	2A	T2, N0, M0	0	F	Mucinous Adenocarcinoma	8480/3: Mucinous adenocarcinoma	2	1	Well-Differentiated	Frozen & Paraffin	positive/positive	negative			9.94195	9.96153	-0.0195717	0
RebeccaRepeat	Br 2 LDA 9-28-09 Plate 1	A10	1061562A15	Invasive Carcinoma	18S-Hs99999901_s1	2	CHTN	60	T2, N0, M0	2A	T2, N0, M0	0	F	Mucinous Adenocarcinoma	8480/3: Mucinous adenocarcinoma	2	1	Well-Differentiated	Frozen & Paraffin	positive/positive	negative			9.96769	9.96153	0.00616333
RebeccaRepeat	Br 2 LDA 9-28-09 Plate 1	A12	1061562A15	Invasive Carcinoma	18S-Hs99999901_s1	3	CHTN	60	T2, N0, M0	2A	T2, N0, M0	0	F	Mucinous Adenocarcinoma	8480/3: Mucinous adenocarcinoma	2	1	Well-Differentiated	Frozen & Paraffin	positive/positive	negative			9.97493	9.96153	0.0134083
Jill	10-06-08 Samples 18-21s-09-12	M10	1061897A3	Invasive Carcinoma	18S-Hs99999901_s1	1	CHTN	85	T2N2aM0	3A	T2N2aM0	1		invasive lobular carcinoma	8524/3: Infiltrating lobular mixed with other types of ca.	3	1	Well-differentiated		positive/positive	negative	Postmenopausal		7.72259	7.70997	0.0126231	0
Jill	10-06-08 Samples 18-21s-09-12	M11	1061897A3	Invasive Carcinoma	18S-Hs99999901_s1	2	CHTN	85	T2N2aM0	3A	T2N2aM0	1		invasive lobular carcinoma	8524/3: Infiltrating lobular mixed with other types of ca.	3	1	Well-differentiated		positive/positive	negative	Postmenopausal		7.90671	7.70997	0.196745
Jill	10-06-08 Samples 18-21s-09-12	M12	1061897A3	Invasive Carcinoma	18S-Hs99999901_s1	3	CHTN	85	T2N2aM0	3A	T2N2aM0	1		invasive lobular carcinoma	8524/3: Infiltrating lobular mixed with other types of ca.	3	1	Well-differentiated		positive/positive	negative	Postmenopausal		7.5006	7.70997	-0.209368
RebeccaRepeat	Br 2 LDA 9-28-09 Plate 2	A10	1062323A6	Invasive Carcinoma	18S-Hs99999901_s1	1	CHTN	62	T2N0M0	2A	T2N0M0	0	F	Infiltrating Ductal Carcinoma	8500/3: Infiltrating duct carcinoma, NOS	2	3	Poorly Differentiated	Frozen & Paraffin	negative/negative	negative			8.697	8.83488	-0.137883	0
RebeccaRepeat	Br 2 LDA 9-28-09 Plate 2	A11	1062323A6	Invasive Carcinoma	18S-Hs99999901_s1	2	CHTN	62	T2N0M0	2A	T2N0M0	0	F	Infiltrating Ductal Carcinoma	8500/3: Infiltrating duct carcinoma, NOS	2	3	Poorly Differentiated	Frozen & Paraffin	negative/negative	negative			8.83556	8.83488	0.000678333
RebeccaRepeat	Br 2 LDA 9-28-09 Plate 2	A12	1062323A6	Invasive Carcinoma	18S-Hs99999901_s1	3	CHTN	62	T2N0M0	2A	T2N0M0	0	F	Infiltrating Ductal Carcinoma	8500/3: Infiltrating duct carcinoma, NOS	2	3	Poorly Differentiated	Frozen & Paraffin	negative/negative	negative			8.97209	8.83488	0.137204
RebeccaRepeat	Br 2 LDA 9-28-09 Plate 1	E10	1070062A1	Invasive Carcinoma	18S-Hs99999901_s1	1	CHTN	49	T2N0M0	2A	T2N0M0	0	F	Ductal Adenocarcinoma	8500/3: Infiltrating duct carcinoma, NOS	2	3	Poorly differentiated		positive/positive	negative			9.81246	9.88308	-0.0706283	-1.77636e-15
RebeccaRepeat	Br 2 LDA 9-28-09 Plate 1	E11	1070062A1	Invasive Carcinoma	18S-Hs99999901_s1	2	CHTN	49	T2N0M0	2A	T2N0M0	0	F	Ductal Adenocarcinoma	8500/3: Infiltrating duct carcinoma, NOS	2	3	Poorly differentiated		positive/positive	negative			9.89935	9.88308	0.0162667
RebeccaRepeat	Br 2 LDA 9-28-09 Plate 1	E12	1070062A1	Invasive Carcinoma	18S-Hs99999901_s1	3	CHTN	49	T2N0M0	2A	T2N0M0	0	F	Ductal Adenocarcinoma	8500/3: Infiltrating duct carcinoma, NOS	2	3	Poorly differentiated		positive/positive	negative			9.93745	9.88308	0.0543617
Jill	10-06-08 Samples 22-25Maricicass12-16	M10	1070512A1	Invasive Carcinoma	18S-Hs99999901_s1	1	CHTN	80	T1cN0M0	1A	T1cN0M0	0		invasive ductal carcinoma	8500/3: Infiltrating duct carcinoma, NOS	1	2	Moderately differentiated		positive/positive	negative			6.81043	6.83775	-0.0273199	8.88178e-16
Jill	10-06-08 Samples 22-25Maricicass12-16	M11	1070512A1	Invasive Carcinoma	18S-Hs99999901_s1	2	CHTN	80	T1cN0M0	1A	T1cN0M0	0		invasive ductal carcinoma	8500/3: Infiltrating duct carcinoma, NOS	1	2	Moderately differentiated		positive/positive	negative			6.81711	6.83775	-0.020639
Jill	10-06-08 Samples 22-25Maricicass12-16	M12	1070512A1	Invasive Carcinoma	18S-Hs99999901_s1	3	CHTN	80	T1cN0M0	1A	T1cN0M0	0		invasive ductal carcinoma	8500/3: Infiltrating duct carcinoma, NOS	1	2	Moderately differentiated		positive/positive	negative			6.88571	6.83775	0.0479588
2 RebeccaRepeat	Br 2 LDA 11-18-09 Plate 1	M10	1072014A5	Invasive Carcinoma	18S-Hs99999901_s1	1	CHTN	49	T3N0M0	2B	T3N0M0	0	F	Invasive ductal carcinoma	8500/3: Infiltrating duct carcinoma, NOS	2	3	Poorly differentiated		positive/positive	positive			5.50969	5.80943	-0.299741	-2.96059e-16
2 RebeccaRepeat	Br 2 LDA 11-18-09 Plate 1	M11	1072014A5	Invasive Carcinoma	18S-Hs99999901_s1	2	CHTN	49	T3N0M0	2B	T3N0M0	0	F	Invasive ductal carcinoma	8500/3: Infiltrating duct carcinoma, NOS	2	3	Poorly differentiated		positive/positive	positive			5.75493	5.80943	-0.0544913
2 RebeccaRepeat	Br 2 LDA 11-18-09 Plate 1	M12	1072014A5	Invasive Carcinoma	18S-Hs99999901_s1	3	CHTN	49	T3N0M0	2B	T3N0M0	0	F	Invasive ductal carcinoma	8500/3: Infiltrating duct carcinoma, NOS	2	3	Poorly differentiated		positive/positive	positive			6.16366	5.80943	0.354233
RebeccaRepeat	Br 2 LDA 9-25-09 Plate 1	A10	1080312A4	Invasive Carcinoma	18S-Hs99999901_s1	1	CHTN	71	T2N1M0	2B	T2N1M0	1	F	Invasive Ductal Carcinoma	8500/3: Infiltrating duct carcinoma, NOS	2	2	Moderately differentiated	Frozen& Paraffin	positive/positive	negative			10.009	10.076	-0.0669783	-1.18424e-15
RebeccaRepeat	Br 2 LDA 9-25-09 Plate 1	A11	1080312A4	Invasive Carcinoma	18S-Hs99999901_s1	2	CHTN	71	T2N1M0	2B	T2N1M0	1	F	Invasive Ductal Carcinoma	8500/3: Infiltrating duct carcinoma, NOS	2	2	Moderately differentiated	Frozen& Paraffin	positive/positive	negative			10.0517	10.076	-0.0243073
RebeccaRepeat	Br 2 LDA 9-25-09 Plate 1	A12	1080312A4	Invasive Carcinoma	18S-Hs99999901_s1	3	CHTN	71	T2N1M0	2B	T2N1M0	1	F	Invasive Ductal Carcinoma	8500/3: Infiltrating duct carcinoma, NOS	2	2	Moderately differentiated	Frozen& Paraffin	positive/positive	negative			10.1673	10.076	0.0912857
2 RebeccaRepeat	Br 2 LDA 10-26-09 Plate 2 mirVana	E11	1080502A1	Invasive Carcinoma	18S-Hs99999901_s1	1	CHTN	42	T2N0M0	2A	T2N0M0	0	F	Invasive Ductal Carcinoma	8500/3: Infiltrating duct carcinoma, NOS	2	3	Poorly differentiated	Frozen& Paraffin	pending	pending			14.3246	14.3589	-0.0342873	0
2 RebeccaRepeat	Br 2 LDA 10-26-09 Plate 2 mirVana	E10	1080502A1	Invasive Carcinoma	18S-Hs99999901_s1	2	CHTN	42	T2N0M0	2A	T2N0M0	0	F	Invasive Ductal Carcinoma	8500/3: Infiltrating duct carcinoma, NOS	2	3	Poorly differentiated	Frozen& Paraffin	pending	pending			14.3278	14.3589	-0.0311163
2 RebeccaRepeat	Br 2 LDA 10-26-09 Plate 2 mirVana	E12	1080502A1	Invasive Carcinoma	18S-Hs99999901_s1	3	CHTN	42	T2N0M0	2A	T2N0M0	0	F	Invasive Ductal Carcinoma	8500/3: Infiltrating duct carcinoma, NOS	2	3	Poorly differentiated	Frozen& Paraffin	pending	pending			14.4243	14.3589	0.0654037
2 RebeccaRepeat	Br 2 LDA 10-26-09 Plate 2 mirVana	A12	1080719B5	Invasive Carcinoma	18S-Hs99999901_s1	1	CHTN	64	T3N0M0	2B	T3N0M0	0	F	Invasive Ductal Carcinoma	8500/3: Infiltrating duct carcinoma, NOS	2	3	Poorly Differentiated	Frozen & Paraffin	ordered	ordered			15.9737	16.0027	-0.0290103	5.92119e-16
2 RebeccaRepeat	Br 2 LDA 10-26-09 Plate 2 mirVana	A10	1080719B5	Invasive Carcinoma	18S-Hs99999901_s1	2	CHTN	64	T3N0M0	2B	T3N0M0	0	F	Invasive Ductal Carcinoma	8500/3: Infiltrating duct carcinoma, NOS	2	3	Poorly Differentiated	Frozen & Paraffin	ordered	ordered			15.9791	16.0027	-0.0235403
2 RebeccaRepeat	Br 2 LDA 10-26-09 Plate 2 mirVana	A11	1080719B5	Invasive Carcinoma	18S-Hs99999901_s1	3	CHTN	64	T3N0M0	2B	T3N0M0	0	F	Invasive Ductal Carcinoma	8500/3: Infiltrating duct carcinoma, NOS	2	3	Poorly Differentiated	Frozen & Paraffin	ordered	ordered			16.0552	16.0027	0.0525507
2 RebeccaRepeat	Br 2 LDA 10-26-09 Plate 2 mirVana	I10	1081454A6	Invasive Carcinoma	18S-Hs99999901_s1	1	CHTN	51	T2N0M0	2A	T2N0M0	0	M	Invasive Ductal Carcinoma	8500/3: Infiltrating duct carcinoma, NOS	2	3	Poorly Differentiated	Frozen & Paraffin	positive / negative	negative			13.9161	13.9592	-0.043107	-5.92119e-16
2 RebeccaRepeat	Br 2 LDA 10-26-09 Plate 2 mirVana	I12	1081454A6	Invasive Carcinoma	18S-Hs99999901_s1	2	CHTN	51	T2N0M0	2A	T2N0M0	0	M	Invasive Ductal Carcinoma	8500/3: Infiltrating duct carcinoma, NOS	2	3	Poorly Differentiated	Frozen & Paraffin	positive / negative	negative			13.9792	13.9592	0.019943
2 RebeccaRepeat	Br 2 LDA 10-26-09 Plate 2 mirVana	I11	1081454A6	Invasive Carcinoma	18S-Hs99999901_s1	3	CHTN	51	T2N0M0	2A	T2N0M0	0	M	Invasive Ductal Carcinoma	8500/3: Infiltrating duct carcinoma, NOS	2	3	Poorly Differentiated	Frozen & Paraffin	positive / negative	negative			13.9824	13.9592	0.023164
Jill	10-06-08 Samples 18-21s-09-12	E10	3061119A4	Invasive Carcinoma	18S-Hs99999901_s1	1	CHTN	74	T2N0M0	2A	T2N0M0	0		infiltrating ductal carcinoma with mucinous differentiation	8523/3: Infiltrating duct mixed with other types of ca.	2	1	Well-differentiated						7.74835	8.0076	-0.259251	-2.96059e-16
Jill	10-06-08 Samples 18-21s-09-12	E11	3061119A4	Invasive Carcinoma	18S-Hs99999901_s1	2	CHTN	74	T2N0M0	2A	T2N0M0	0		infiltrating ductal carcinoma with mucinous differentiation	8523/3: Infiltrating duct mixed with other types of ca.	2	1	Well-differentiated						7.988	8.0076	-0.0196063
Jill	10-06-08 Samples 18-21s-09-12	E12	3061119A4	Invasive Carcinoma	18S-Hs99999901_s1	3	CHTN	74	T2N0M0	2A	T2N0M0	0		infiltrating ductal carcinoma with mucinous differentiation	8523/3: Infiltrating duct mixed with other types of ca.	2	1	Well-differentiated						8.28646	8.0076	0.278857
2 RebeccaRepeat	Br 2 LDA 11-18-09 Plate 1	I10	3062104A7	Invasive Carcinoma	18S-Hs99999901_s1	1	CHTN	52	T2, N0, M0	2A	T2, N0, M0	0	F	Invasive ductal carcinoma	8500/3: Infiltrating duct carcinoma, NOS	2	3	Poorly Differentiated						5.46657	5.27169	0.194881	-2.96059e-16
2 RebeccaRepeat	Br 2 LDA 11-18-09 Plate 1	I11	3062104A7	Invasive Carcinoma	18S-Hs99999901_s1	2	CHTN	52	T2, N0, M0	2A	T2, N0, M0	0	F	Invasive ductal carcinoma	8500/3: Infiltrating duct carcinoma, NOS	2	3	Poorly Differentiated						4.4732	5.27169	-0.798491
2 RebeccaRepeat	Br 2 LDA 11-18-09 Plate 1	I12	3062104A7	Invasive Carcinoma	18S-Hs99999901_s1	3	CHTN	52	T2, N0, M0	2A	T2, N0, M0	0	F	Invasive ductal carcinoma	8500/3: Infiltrating duct carcinoma, NOS	2	3	Poorly Differentiated						5.8753	5.27169	0.60361
Jill	10-06-08 Samples 13-16-s-08-09	I10	3070617A7	Invasive Carcinoma	18S-Hs99999901_s1	1	CHTN	83	T3N0M0	2B	T3N0M0	0		infiltrating ductal carcinoma	8500/3: Infiltrating duct carcinoma, NOS	2	2	Moderately differentiated		positive/positive				10.3119	10.0795	0.232358	5.92119e-16
Jill	10-06-08 Samples 13-16-s-08-09	I11	3070617A7	Invasive Carcinoma	18S-Hs99999901_s1	2	CHTN	83	T3N0M0	2B	T3N0M0	0		infiltrating ductal carcinoma	8500/3: Infiltrating duct carcinoma, NOS	2	2	Moderately differentiated		positive/positive				10.0255	10.0795	-0.0540707
Jill	10-06-08 Samples 13-16-s-08-09	I12	3070617A7	Invasive Carcinoma	18S-Hs99999901_s1	3	CHTN	83	T3N0M0	2B	T3N0M0	0		infiltrating ductal carcinoma	8500/3: Infiltrating duct carcinoma, NOS	2	2	Moderately differentiated		positive/positive				9.90126	10.0795	-0.178288
Jill	10-06-08 Samples 22-25Maricicass12-16	E10	4060634A10	Invasive Carcinoma	18S-Hs99999901_s1	1	CHTN	79	T2N0M0	2A	T2N0M0	0		infiltrating ductal carcinoma with foci of cartilagginous metaplasia (metaplastic carcinoma)	8523/3: Infiltrating duct mixed with other types of ca.	2	3	Poorly differentiated						8.76166	8.78822	-0.0265597	-5.92119e-16
Jill	10-06-08 Samples 22-25Maricicass12-16	E11	4060634A10	Invasive Carcinoma	18S-Hs99999901_s1	2	CHTN	79	T2N0M0	2A	T2N0M0	0		infiltrating ductal carcinoma with foci of cartilagginous metaplasia (metaplastic carcinoma)	8523/3: Infiltrating duct mixed with other types of ca.	2	3	Poorly differentiated						8.72225	8.78822	-0.0659697
Jill	10-06-08 Samples 22-25Maricicass12-16	E12	4060634A10	Invasive Carcinoma	18S-Hs99999901_s1	3	CHTN	79	T2N0M0	2A	T2N0M0	0		infiltrating ductal carcinoma with foci of cartilagginous metaplasia (metaplastic carcinoma)	8523/3: Infiltrating duct mixed with other types of ca.	2	3	Poorly differentiated						8.88075	8.78822	0.0925293
Jill	10-02-08 Samples 9-12	I10	4061094B24	Invasive Carcinoma	18S-Hs99999901_s1	1	CHTN	84	T3N1M0	3C	T3N1M0	1		infiltrating ductal carcinoma	8500/3: Infiltrating duct carcinoma, NOS	3	3	Poorly differentiated						11.0494	11.0615	-0.0120268	0
Jill	10-02-08 Samples 9-12	I11	4061094B24	Invasive Carcinoma	18S-Hs99999901_s1	2	CHTN	84	T3N1M0	3C	T3N1M0	1		infiltrating ductal carcinoma	8500/3: Infiltrating duct carcinoma, NOS	3	3	Poorly differentiated						11.8162	11.0615	0.754699
Jill	10-02-08 Samples 9-12	I12	4061094B24	Invasive Carcinoma	18S-Hs99999901_s1	3	CHTN	84	T3N1M0	3C	T3N1M0	1		infiltrating ductal carcinoma	8500/3: Infiltrating duct carcinoma, NOS	3	3	Poorly differentiated						10.3188	11.0615	-0.742672
Jill	10-02-08 Samples 9-12	M10	4061196A1	Invasive Carcinoma	18S-Hs99999901_s1	1	CHTN	75	T2N0M0	2A	T2N0M0	0		infiltrating lobular carcinoma with pleomorphic features and infiltrating ductal carcinoma (small component)	8524/3: Infiltrating lobular mixed with other types of ca.	2	2	Moderately differentiated						7.07376	7.20059	-0.126837	0
Jill	10-02-08 Samples 9-12	M11	4061196A1	Invasive Carcinoma	18S-Hs99999901_s1	2	CHTN	75	T2N0M0	2A	T2N0M0	0		infiltrating lobular carcinoma with pleomorphic features and infiltrating ductal carcinoma (small component)	8524/3: Infiltrating lobular mixed with other types of ca.	2	2	Moderately differentiated						7.12708	7.20059	-0.0735105
Jill	10-02-08 Samples 9-12	M12	4061196A1	Invasive Carcinoma	18S-Hs99999901_s1	3	CHTN	75	T2N0M0	2A	T2N0M0	0		infiltrating lobular carcinoma with pleomorphic features and infiltrating ductal carcinoma (small component)	8524/3: Infiltrating lobular mixed with other types of ca.	2	2	Moderately differentiated						7.40094	7.20059	0.200347
Jill	10-06-08 Samples 13-16-s-08-09	M10	4070249A3	Invasive Carcinoma	18S-Hs99999901_s1	1	CHTN	61	T2N0M0	2A	T2N0M0	0		invasive lobular carcinoma, pleomorphic type with signet-ring cell features	8524/3: Infiltrating lobular mixed with other types of ca.	2	1	Well-differentiated						11.9656	11.885	0.0806017	-5.92119e-16
Jill	10-06-08 Samples 13-16-s-08-09	M11	4070249A3	Invasive Carcinoma	18S-Hs99999901_s1	2	CHTN	61	T2N0M0	2A	T2N0M0	0		invasive lobular carcinoma, pleomorphic type with signet-ring cell features	8524/3: Infiltrating lobular mixed with other types of ca.	2	1	Well-differentiated						11.8861	11.885	0.00111767
Jill	10-06-08 Samples 13-16-s-08-09	M12	4070249A3	Invasive Carcinoma	18S-Hs99999901_s1	3	CHTN	61	T2N0M0	2A	T2N0M0	0		invasive lobular carcinoma, pleomorphic type with signet-ring cell features	8524/3: Infiltrating lobular mixed with other types of ca.	2	1	Well-differentiated						11.8033	11.885	-0.0817193
RebeccaRepeat	Br 2 LDA 9-28-09 Plate 1	I11	4080633A6	Invasive Carcinoma	18S-Hs99999901_s1	1	CHTN	65	T3, N1, M0	3A	T3, N1, M0	1	F	Invasive Ductal Carcinoma	8500/3: Infiltrating duct carcinoma, NOS	3	3	Poorly Differentiated	Frozen& Paraffin					10.7216	10.7268	-0.00520333	5.92119e-16
RebeccaRepeat	Br 2 LDA 9-28-09 Plate 1	I10	4080633A6	Invasive Carcinoma	18S-Hs99999901_s1	2	CHTN	65	T3, N1, M0	3A	T3, N1, M0	1	F	Invasive Ductal Carcinoma	8500/3: Infiltrating duct carcinoma, NOS	3	3	Poorly Differentiated	Frozen& Paraffin					10.7234	10.7268	-0.00339133
RebeccaRepeat	Br 2 LDA 9-28-09 Plate 1	I12	4080633A6	Invasive Carcinoma	18S-Hs99999901_s1	3	CHTN	65	T3, N1, M0	3A	T3, N1, M0	1	F	Invasive Ductal Carcinoma	8500/3: Infiltrating duct carcinoma, NOS	3	3	Poorly Differentiated	Frozen& Paraffin					10.7354	10.7268	0.00859467
RebeccaLast	Br 2 LDA 1-7-10 Plate 1	I10	T03-104	Invasive Carcinoma	18S-Hs99999901_s1	1	WVUTB	Missing	T3N1M0	3A	T3N1M0	1	F	Infiltrating Ductal Carcinoma	8500/3: Infiltrating duct carcinoma, NOS	3	3	Poorly differentiated	Frozen	negative/negative	negative			14.6131	14.5378	0.0753483	0
RebeccaLast	Br 2 LDA 1-7-10 Plate 1	I11	T03-104	Invasive Carcinoma	18S-Hs99999901_s1	2	WVUTB	Missing	T3N1M0	3A	T3N1M0	1	F	Infiltrating Ductal Carcinoma	8500/3: Infiltrating duct carcinoma, NOS	3	3	Poorly differentiated	Frozen	negative/negative	negative			14.4752	14.5378	-0.0625917
RebeccaLast	Br 2 LDA 1-7-10 Plate 1	I12	T03-104	Invasive Carcinoma	18S-Hs99999901_s1	3	WVUTB	Missing	T3N1M0	3A	T3N1M0	1	F	Infiltrating Ductal Carcinoma	8500/3: Infiltrating duct carcinoma, NOS	3	3	Poorly differentiated	Frozen	negative/negative	negative			14.525	14.5378	-0.0127567
Jill	10-09-08 Samples 50-53s40-44	A10	T033474	Invasive Carcinoma	18S-Hs99999901_s1	1	WVUTB	50	I;T1,NO,MO		T1,NO,MO	0		infiltrating ductal carcinoma	8500/3: Infiltrating duct carcinoma, NOS	1	2	Moderately Differentiated						8.39356	8.56206	-0.168492	5.92119e-16
Jill	10-09-08 Samples 50-53s40-44	A11	T033474	Invasive Carcinoma	18S-Hs99999901_s1	2	WVUTB	50	I;T1,NO,MO		T1,NO,MO	0		infiltrating ductal carcinoma	8500/3: Infiltrating duct carcinoma, NOS	1	2	Moderately Differentiated						8.72466	8.56206	0.162606
Jill	10-09-08 Samples 50-53s40-44	A12	T033474	Invasive Carcinoma	18S-Hs99999901_s1	3	WVUTB	50	I;T1,NO,MO		T1,NO,MO	0		infiltrating ductal carcinoma	8500/3: Infiltrating duct carcinoma, NOS	1	2	Moderately Differentiated						8.56794	8.56206	0.00588533
Jill	10-09-08 Samples 50-53s40-44	I10	T041014	Invasive Carcinoma	18S-Hs99999901_s1	1	WVUTB	66	IIA,T2, N0, M0		T2, N0, M0	0		invasive ductal carcinoma	8500/3: Infiltrating duct carcinoma, NOS	2	3	Poorly differentiated						5.99772	5.78564	0.212085	2.96059e-16
Jill	10-09-08 Samples 50-53s40-44	I11	T041014	Invasive Carcinoma	18S-Hs99999901_s1	2	WVUTB	66	IIA,T2, N0, M0		T2, N0, M0	0		invasive ductal carcinoma	8500/3: Infiltrating duct carcinoma, NOS	2	3	Poorly differentiated						5.579	5.78564	-0.206634
Jill	10-09-08 Samples 50-53s40-44	I12	T041014	Invasive Carcinoma	18S-Hs99999901_s1	3	WVUTB	66	IIA,T2, N0, M0		T2, N0, M0	0		invasive ductal carcinoma	8500/3: Infiltrating duct carcinoma, NOS	2	3	Poorly differentiated						5.78019	5.78564	-0.0054507
2 RebeccaRepeat	Br 2 LDA 11-16-09 Plate 1	M10	T04-167-005	Invasive Carcinoma	18S-Hs99999901_s1	1	WVUTB	43	T2, N0, M0	2A	T2, N0, M0	0	F	Infiltrating metastatic ductal carcinoma	8500/3: Infiltrating duct carcinoma, NOS	2	3	Poorly differentiated	Frozen	positive/positive	intermediate	Pre menopausal		10.6944	10.7992	-0.10487	0
2 RebeccaRepeat	Br 2 LDA 11-16-09 Plate 1	M12	T04-167-005	Invasive Carcinoma	18S-Hs99999901_s1	2	WVUTB	43	T2, N0, M0	2A	T2, N0, M0	0	F	Infiltrating metastatic ductal carcinoma	8500/3: Infiltrating duct carcinoma, NOS	2	3	Poorly differentiated	Frozen	positive/positive	intermediate	Pre menopausal		10.7362	10.7992	-0.063063
2 RebeccaRepeat	Br 2 LDA 11-16-09 Plate 1	M11	T04-167-005	Invasive Carcinoma	18S-Hs99999901_s1	3	WVUTB	43	T2, N0, M0	2A	T2, N0, M0	0	F	Infiltrating metastatic ductal carcinoma	8500/3: Infiltrating duct carcinoma, NOS	2	3	Poorly differentiated	Frozen	positive/positive	intermediate	Pre menopausal		10.9672	10.7992	0.167933
Jill	10-09-08 Samples 46-49s37-40	I10	T053774	Invasive Carcinoma	18S-Hs99999901_s1	1	WVUTB	59	IIA;T2,N0,M0		T2,N0,M0	0		infiltrating ductal carcinoma	8500/3: Infiltrating duct carcinoma, NOS	2	3	Poorly differentiated						5.88422	5.64001	0.244213	0
Jill	10-09-08 Samples 46-49s37-40	I11	T053774	Invasive Carcinoma	18S-Hs99999901_s1	2	WVUTB	59	IIA;T2,N0,M0		T2,N0,M0	0		infiltrating ductal carcinoma	8500/3: Infiltrating duct carcinoma, NOS	2	3	Poorly differentiated						5.13301	5.64001	-0.506991
Jill	10-09-08 Samples 46-49s37-40	I12	T053774	Invasive Carcinoma	18S-Hs99999901_s1	3	WVUTB	59	IIA;T2,N0,M0		T2,N0,M0	0		infiltrating ductal carcinoma	8500/3: Infiltrating duct carcinoma, NOS	2	3	Poorly differentiated						5.90278	5.64001	0.262778
Jill	10-07-08 Samples 34-37-Maricicas-27-28	A10	T053889	Invasive Carcinoma	18S-Hs99999901_s1	1	WVUTB	80	IIA, pT2, pN0, pM0		pT2, pN0, pM0	0		infiltrating ductal adenocarcinoma	8500/3: Infiltrating duct carcinoma, NOS	2	3	Poorly differentiated						6.93378	7.30877	-0.374988	0
Jill	10-07-08 Samples 34-37-Maricicas-27-28	A11	T053889	Invasive Carcinoma	18S-Hs99999901_s1	2	WVUTB	80	IIA, pT2, pN0, pM0		pT2, pN0, pM0	0		infiltrating ductal adenocarcinoma	8500/3: Infiltrating duct carcinoma, NOS	2	3	Poorly differentiated						7.7638	7.30877	0.455028
Jill	10-07-08 Samples 34-37-Maricicas-27-28	A12	T053889	Invasive Carcinoma	18S-Hs99999901_s1	3	WVUTB	80	IIA, pT2, pN0, pM0		pT2, pN0, pM0	0		infiltrating ductal adenocarcinoma	8500/3: Infiltrating duct carcinoma, NOS	2	3	Poorly differentiated						7.22873	7.30877	-0.0800401
Jill	10-08-08 Samples 38-41s31-32	M10	T0607908	Invasive Carcinoma	18S-Hs99999901_s1	1	WVUTB	46	IIA, pT2N0M0		pT2N0M0	0		papillary carcinoma	8050/3: Papillary carcinoma, NOS	2	2	Moderately differentiated						6.49694	6.56973	-0.0727872	2.96059e-16
Jill	10-08-08 Samples 38-41s31-32	M11	T0607908	Invasive Carcinoma	18S-Hs99999901_s1	2	WVUTB	46	IIA, pT2N0M0		pT2N0M0	0		papillary carcinoma	8050/3: Papillary carcinoma, NOS	2	2	Moderately differentiated						6.62816	6.56973	0.0584248
Jill	10-08-08 Samples 38-41s31-32	M12	T0607908	Invasive Carcinoma	18S-Hs99999901_s1	3	WVUTB	46	IIA, pT2N0M0		pT2N0M0	0		papillary carcinoma	8050/3: Papillary carcinoma, NOS	2	2	Moderately differentiated						6.58409	6.56973	0.0143624
Jill	10-08-08 Samples 42-45s32-36	I10	T061324	Invasive Carcinoma	18S-Hs99999901_s1	1	WVUTB	55	II, pT2, pN0, pM0		pT2, pN0, pM0	0		invasive ductal adenocarcinoma, mucinous	8500/3: Infiltrating duct carcinoma, NOS	2	3	Poorly Differentiated						6.24132	6.26543	-0.0241125	0
Jill	10-08-08 Samples 42-45s32-36	I11	T061324	Invasive Carcinoma	18S-Hs99999901_s1	2	WVUTB	55	II, pT2, pN0, pM0		pT2, pN0, pM0	0		invasive ductal adenocarcinoma, mucinous	8500/3: Infiltrating duct carcinoma, NOS	2	3	Poorly Differentiated						6.39325	6.26543	0.127823
Jill	10-08-08 Samples 42-45s32-36	I12	T061324	Invasive Carcinoma	18S-Hs99999901_s1	3	WVUTB	55	II, pT2, pN0, pM0		pT2, pN0, pM0	0		invasive ductal adenocarcinoma, mucinous	8500/3: Infiltrating duct carcinoma, NOS	2	3	Poorly Differentiated						6.16172	6.26543	-0.103711
Jill	10-07-08 Samples 34-37-Maricicas-27-28	I10	T0621513	Invasive Carcinoma	18S-Hs99999901_s1	1	WVUTB	86	IIIB, T4, N1, M0		T4, N1, M0	1		mammary carcinoma, predominately mucinous adenocarcinoma with areas of infiltrating ductal carcinoma	8480/3: Mucinous adenocarcinoma	3	3	Poorly differentiated						7.70132	7.7534	-0.0520837	2.96059e-16
Jill	10-07-08 Samples 34-37-Maricicas-27-28	I11	T0621513	Invasive Carcinoma	18S-Hs99999901_s1	2	WVUTB	86	IIIB, T4, N1, M0		T4, N1, M0	1		mammary carcinoma, predominately mucinous adenocarcinoma with areas of infiltrating ductal carcinoma	8480/3: Mucinous adenocarcinoma	3	3	Poorly differentiated						7.70166	7.7534	-0.0517417
Jill	10-07-08 Samples 34-37-Maricicas-27-28	I12	T0621513	Invasive Carcinoma	18S-Hs99999901_s1	3	WVUTB	86	IIIB, T4, N1, M0		T4, N1, M0	1		mammary carcinoma, predominately mucinous adenocarcinoma with areas of infiltrating ductal carcinoma	8480/3: Mucinous adenocarcinoma	3	3	Poorly differentiated						7.85723	7.7534	0.103825
Jill	10-07-08 Samples 34-37-Maricicas-27-28	M10	T0630919	Invasive Carcinoma	18S-Hs99999901_s1	1	WVUTB	58	I, pT1,pN0, pM0		pT1,pN0, pM0	0		invasive ductal carcinoma, mucinous carcinoma	8500/3: Infiltrating duct carcinoma, NOS	1	1	Well-differentiated						8.36524	8.44754	-0.082292	-5.92119e-16
Jill	10-07-08 Samples 34-37-Maricicas-27-28	M11	T0630919	Invasive Carcinoma	18S-Hs99999901_s1	2	WVUTB	58	I, pT1,pN0, pM0		pT1,pN0, pM0	0		invasive ductal carcinoma, mucinous carcinoma	8500/3: Infiltrating duct carcinoma, NOS	1	1	Well-differentiated						8.47283	8.44754	0.025293
Jill	10-07-08 Samples 34-37-Maricicas-27-28	M12	T0630919	Invasive Carcinoma	18S-Hs99999901_s1	3	WVUTB	58	I, pT1,pN0, pM0		pT1,pN0, pM0	0		invasive ductal carcinoma, mucinous carcinoma	8500/3: Infiltrating duct carcinoma, NOS	1	1	Well-differentiated						8.50454	8.44754	0.056999
RebeccaRepeat	Br 2 LDA 9-28-09 Plate 2	I10	T06-326-013	Invasive Carcinoma	18S-Hs99999901_s1	1	WVUTB	44	pT2, pN2a, pMx	3A	pT2, pN2a, pMx	1	F	Invasive ductal carcinoma	8500/3: Infiltrating duct carcinoma, NOS	3	3	Poorly differentiated	Frozen	Positive / Positive	negative			8.95366	9.01661	-0.0629507	-5.92119e-16
RebeccaRepeat	Br 2 LDA 9-28-09 Plate 2	I11	T06-326-013	Invasive Carcinoma	18S-Hs99999901_s1	2	WVUTB	44	pT2, pN2a, pMx	3A	pT2, pN2a, pMx	1	F	Invasive ductal carcinoma	8500/3: Infiltrating duct carcinoma, NOS	3	3	Poorly differentiated	Frozen	Positive / Positive	negative			8.9721	9.01661	-0.0445167
RebeccaRepeat	Br 2 LDA 9-28-09 Plate 2	I12	T06-326-013	Invasive Carcinoma	18S-Hs99999901_s1	3	WVUTB	44	pT2, pN2a, pMx	3A	pT2, pN2a, pMx	1	F	Invasive ductal carcinoma	8500/3: Infiltrating duct carcinoma, NOS	3	3	Poorly differentiated	Frozen	Positive / Positive	negative			9.12408	9.01661	0.107467
Jill	10-08-08 Samples 38-41s31-32	A10	T0633206	Invasive Carcinoma	18S-Hs99999901_s1	1	WVUTB	50	IIA, pT2, pN0, pM0		pT2, pN0, pM0	0		invasive ductal carcinoma	8500/3: Infiltrating duct carcinoma, NOS	2	1	Well-differentiated						8.38511	8.27849	0.106625	5.92119e-16
Jill	10-08-08 Samples 38-41s31-32	A11	T0633206	Invasive Carcinoma	18S-Hs99999901_s1	2	WVUTB	50	IIA, pT2, pN0, pM0		pT2, pN0, pM0	0		invasive ductal carcinoma	8500/3: Infiltrating duct carcinoma, NOS	2	1	Well-differentiated						8.48178	8.27849	0.203286
Jill	10-08-08 Samples 38-41s31-32	A12	T0633206	Invasive Carcinoma	18S-Hs99999901_s1	3	WVUTB	50	IIA, pT2, pN0, pM0		pT2, pN0, pM0	0		invasive ductal carcinoma	8500/3: Infiltrating duct carcinoma, NOS	2	1	Well-differentiated						7.96858	8.27849	-0.309912
Jill	10-08-08 Samples 42-45s32-36	A10	T0633418	Invasive Carcinoma	18S-Hs99999901_s1	1	WVUTB	50	IIIC, pT1, pN3a, pM0		pT1, pN3a, pM0	1		infiltrating ductal adenocarcinoma	8500/3: Infiltrating duct carcinoma, NOS	3	3	Poorly Differentiated						4.12931	4.40614	-0.276829	0
Jill	10-08-08 Samples 42-45s32-36	A11	T0633418	Invasive Carcinoma	18S-Hs99999901_s1	2	WVUTB	50	IIIC, pT1, pN3a, pM0		pT1, pN3a, pM0	1		infiltrating ductal adenocarcinoma	8500/3: Infiltrating duct carcinoma, NOS	3	3	Poorly Differentiated						4.65157	4.40614	0.24543
Jill	10-08-08 Samples 42-45s32-36	A12	T0633418	Invasive Carcinoma	18S-Hs99999901_s1	3	WVUTB	50	IIIC, pT1, pN3a, pM0		pT1, pN3a, pM0	1		infiltrating ductal adenocarcinoma	8500/3: Infiltrating duct carcinoma, NOS	3	3	Poorly Differentiated						4.43754	4.40614	0.0313988
Jill	10-07-08 Samples 26-29s-17-20	A10	T066004	Invasive Carcinoma	18S-Hs99999901_s1	1	WVUTB	46	IIA, T2, N1, M0		T2, N1, M0	1		infiltrating ductal carcinoma	8500/3: Infiltrating duct carcinoma, NOS	2	3	Poorly differentiated						8.76153	8.53468	0.226854	0
Jill	10-07-08 Samples 26-29s-17-20	A11	T066004	Invasive Carcinoma	18S-Hs99999901_s1	2	WVUTB	46	IIA, T2, N1, M0		T2, N1, M0	1		infiltrating ductal carcinoma	8500/3: Infiltrating duct carcinoma, NOS	2	3	Poorly differentiated						8.43225	8.53468	-0.10243
Jill	10-07-08 Samples 26-29s-17-20	A12	T066004	Invasive Carcinoma	18S-Hs99999901_s1	3	WVUTB	46	IIA, T2, N1, M0		T2, N1, M0	1		infiltrating ductal carcinoma	8500/3: Infiltrating duct carcinoma, NOS	2	3	Poorly differentiated						8.41025	8.53468	-0.124425
Jill	10-07-08 Samples 30-33s-21-24	I10	T069213	Invasive Carcinoma	18S-Hs99999901_s1	1	WVUTB	80	1, T1, N0, M0		T1, N0, M0	0		invasive pleomorphic lobular carcinoma	8524/3: Infiltrating lobular mixed with other types of ca.	1	3	Poorly differentiated						7.78361	7.49955	0.284057	0
Jill	10-07-08 Samples 30-33s-21-24	I11	T069213	Invasive Carcinoma	18S-Hs99999901_s1	2	WVUTB	80	1, T1, N0, M0		T1, N0, M0	0		invasive pleomorphic lobular carcinoma	8524/3: Infiltrating lobular mixed with other types of ca.	1	3	Poorly differentiated						7.61186	7.49955	0.112311
Jill	10-07-08 Samples 30-33s-21-24	I12	T069213	Invasive Carcinoma	18S-Hs99999901_s1	3	WVUTB	80	1, T1, N0, M0		T1, N0, M0	0		invasive pleomorphic lobular carcinoma	8524/3: Infiltrating lobular mixed with other types of ca.	1	3	Poorly differentiated						7.10319	7.49955	-0.396368
2 RebeccaRepeat	Br 2 LDA 11-10-09 Plate 1	A11	T07-086-004	Invasive Carcinoma	18S-Hs99999901_s1	1	WVUTB	45	pT1c, pN0(i-), pM0	1	pT1c, pN0(i-), pM0	0	F	Invasive ductal carcinoma	8500/3: Infiltrating duct carcinoma, NOS	1	3	Poorly differentiated	Frozen	positive / positive	negative			27.7845	28.6578	-0.873395	2.36848e-15
2 RebeccaRepeat	Br 2 LDA 11-10-09 Plate 1	A10	T07-086-004	Invasive Carcinoma	18S-Hs99999901_s1	2	WVUTB	45	pT1c, pN0(i-), pM0	1	pT1c, pN0(i-), pM0	0	F	Invasive ductal carcinoma	8500/3: Infiltrating duct carcinoma, NOS	1	3	Poorly differentiated	Frozen	positive / positive	negative			28.3685	28.6578	-0.289397
2 RebeccaRepeat	Br 2 LDA 11-10-09 Plate 1	A12	T07-086-004	Invasive Carcinoma	18S-Hs99999901_s1	3	WVUTB	45	pT1c, pN0(i-), pM0	1	pT1c, pN0(i-), pM0	0	F	Invasive ductal carcinoma	8500/3: Infiltrating duct carcinoma, NOS	1	3	Poorly differentiated	Frozen	positive / positive	negative			29.8206	28.6578	1.16279
Jill	10-09-08 Samples 46-49s37-40	A10	T0714312	Invasive Carcinoma	18S-Hs99999901_s1	1	WVUTB	42	IIA;T2,N0,M0		T2,N0,M0	0		recurrent/residual infiltrating ductal adenocarcinoma with an extensive intraductal component	8500/3: Infiltrating duct carcinoma, NOS	2	3	Poorly differentiated						7.1309	6.7503	0.380608	2.96059e-16
Jill	10-09-08 Samples 46-49s37-40	A11	T0714312	Invasive Carcinoma	18S-Hs99999901_s1	2	WVUTB	42	IIA;T2,N0,M0		T2,N0,M0	0		recurrent/residual infiltrating ductal adenocarcinoma with an extensive intraductal component	8500/3: Infiltrating duct carcinoma, NOS	2	3	Poorly differentiated						6.58128	6.7503	-0.169019
Jill	10-09-08 Samples 46-49s37-40	A12	T0714312	Invasive Carcinoma	18S-Hs99999901_s1	3	WVUTB	42	IIA;T2,N0,M0		T2,N0,M0	0		recurrent/residual infiltrating ductal adenocarcinoma with an extensive intraductal component	8500/3: Infiltrating duct carcinoma, NOS	2	3	Poorly differentiated						6.53871	6.7503	-0.211589
Jill	10-09-08 Samples 46-49s37-40	M10	T071626	Invasive Carcinoma	18S-Hs99999901_s1	1	WVUTB	69	IV, pT3, pN1a, pM0		pT3, pN1a, pM0	1		invasive ductal carcinoma	8500/3: Infiltrating duct carcinoma, NOS	3	3	Poorly differentiated						6.60355	6.71873	-0.115182	0
Jill	10-09-08 Samples 46-49s37-40	M11	T071626	Invasive Carcinoma	18S-Hs99999901_s1	2	WVUTB	69	IV, pT3, pN1a, pM0		pT3, pN1a, pM0	1		invasive ductal carcinoma	8500/3: Infiltrating duct carcinoma, NOS	3	3	Poorly differentiated						6.65194	6.71873	-0.0667907
Jill	10-09-08 Samples 46-49s37-40	M12	T071626	Invasive Carcinoma	18S-Hs99999901_s1	3	WVUTB	69	IV, pT3, pN1a, pM0		pT3, pN1a, pM0	1		invasive ductal carcinoma	8500/3: Infiltrating duct carcinoma, NOS	3	3	Poorly differentiated						6.9007	6.71873	0.181972
Jill	10-09-08 Samples 50-53s40-44	M10	T0717210	Invasive Carcinoma	18S-Hs99999901_s1	1	WVUTB	50	IIIB,pT2, pN2a, pM0		pT2, pN2a, pM0	1		invasive ductal carcinoma	8500/3: Infiltrating duct carcinoma, NOS	3	2	Moderately differentiated						8.16328	7.90212	0.261167	-5.92119e-16
Jill	10-09-08 Samples 50-53s40-44	M11	T0717210	Invasive Carcinoma	18S-Hs99999901_s1	2	WVUTB	50	IIIB,pT2, pN2a, pM0		pT2, pN2a, pM0	1		invasive ductal carcinoma	8500/3: Infiltrating duct carcinoma, NOS	3	2	Moderately differentiated						7.45482	7.90212	-0.447291
Jill	10-09-08 Samples 50-53s40-44	M12	T0717210	Invasive Carcinoma	18S-Hs99999901_s1	3	WVUTB	50	IIIB,pT2, pN2a, pM0		pT2, pN2a, pM0	1		invasive ductal carcinoma	8500/3: Infiltrating duct carcinoma, NOS	3	2	Moderately differentiated						8.08824	7.90212	0.186123
Jill	10-07-08 Samples 26-29s-17-20	I10	T071976	Invasive Carcinoma	18S-Hs99999901_s1	1	WVUTB	43	IIIA;T3,N1,M0		T3,N1,M0	1		resdiual, invasive infiltrating ductal carcinoma	8500/3: Infiltrating duct carcinoma, NOS	3	3	Poorly differentiated						6.16089	5.98754	0.173344	-2.96059e-16
Jill	10-07-08 Samples 26-29s-17-20	I11	T071976	Invasive Carcinoma	18S-Hs99999901_s1	2	WVUTB	43	IIIA;T3,N1,M0		T3,N1,M0	1		resdiual, invasive infiltrating ductal carcinoma	8500/3: Infiltrating duct carcinoma, NOS	3	3	Poorly differentiated						5.70578	5.98754	-0.281763
Jill	10-07-08 Samples 26-29s-17-20	I12	T071976	Invasive Carcinoma	18S-Hs99999901_s1	3	WVUTB	43	IIIA;T3,N1,M0		T3,N1,M0	1		resdiual, invasive infiltrating ductal carcinoma	8500/3: Infiltrating duct carcinoma, NOS	3	3	Poorly differentiated						6.09596	5.98754	0.108419
Jill	10-08-08 Samples 42-45s32-36	M10	T07593	Invasive Carcinoma	18S-Hs99999901_s1	1	WVUTB	67	IIB,pT2, pN1b, pM0		pT2, pN1b, pM0	1		invasive ductal carcinoma	8500/3: Infiltrating duct carcinoma, NOS	2	2	Moderately differentiated						6.69928	6.63636	0.0629155	2.96059e-16
Jill	10-08-08 Samples 42-45s32-36	M11	T07593	Invasive Carcinoma	18S-Hs99999901_s1	2	WVUTB	67	IIB,pT2, pN1b, pM0		pT2, pN1b, pM0	1		invasive ductal carcinoma	8500/3: Infiltrating duct carcinoma, NOS	2	2	Moderately differentiated						6.2827	6.63636	-0.353667
Jill	10-08-08 Samples 42-45s32-36	M12	T07593	Invasive Carcinoma	18S-Hs99999901_s1	3	WVUTB	67	IIB,pT2, pN1b, pM0		pT2, pN1b, pM0	1		invasive ductal carcinoma	8500/3: Infiltrating duct carcinoma, NOS	2	2	Moderately differentiated						6.92711	6.63636	0.290751
Jill	10-07-08 Samples 30-33s-21-24	E10	T07818	Invasive Carcinoma	18S-Hs99999901_s1	1	WVUTB	43	IIB, T2 N1 M0		T2 N1 M0	1		invasive ductal carcinoma	8500/3: Infiltrating duct carcinoma, NOS	2	3	Poorly differentiated						9.03447	9.34579	-0.311323	1.18424e-15
Jill	10-07-08 Samples 30-33s-21-24	E11	T07818	Invasive Carcinoma	18S-Hs99999901_s1	2	WVUTB	43	IIB, T2 N1 M0		T2 N1 M0	1		invasive ductal carcinoma	8500/3: Infiltrating duct carcinoma, NOS	2	3	Poorly differentiated						9.51954	9.34579	0.173744
Jill	10-07-08 Samples 30-33s-21-24	E12	T07818	Invasive Carcinoma	18S-Hs99999901_s1	3	WVUTB	43	IIB, T2 N1 M0		T2 N1 M0	1		invasive ductal carcinoma	8500/3: Infiltrating duct carcinoma, NOS	2	3	Poorly differentiated						9.48337	9.34579	0.137579
RebeccaRepeat	Br 2 LDA 9-25-09 Plate 1	I10	T09-013-004	Invasive Carcinoma	18S-Hs99999901_s1	1	WVUTB	68	T1, N0, M0	1	T1, N0, M0	0	F	Invasive ductal carcinoma	8500/3: Infiltrating duct carcinoma, NOS	1	2	Moderately differentiated	Frozen	positive/positive	negative	Post menopausal		9.44712	9.49052	-0.043401	0
RebeccaRepeat	Br 2 LDA 9-25-09 Plate 1	I11	T09-013-004	Invasive Carcinoma	18S-Hs99999901_s1	2	WVUTB	68	T1, N0, M0	1	T1, N0, M0	0	F	Invasive ductal carcinoma	8500/3: Infiltrating duct carcinoma, NOS	1	2	Moderately differentiated	Frozen	positive/positive	negative	Post menopausal		9.47428	9.49052	-0.016247
RebeccaRepeat	Br 2 LDA 9-25-09 Plate 1	I12	T09-013-004	Invasive Carcinoma	18S-Hs99999901_s1	3	WVUTB	68	T1, N0, M0	1	T1, N0, M0	0	F	Invasive ductal carcinoma	8500/3: Infiltrating duct carcinoma, NOS	1	2	Moderately differentiated	Frozen	positive/positive	negative	Post menopausal		9.55017	9.49052	0.059648
RebeccaRepeat	Br 2 LDA 9-28-09 Plate 2	E11	T09-023-003	Invasive Carcinoma	18S-Hs99999901_s1	1	WVUTB	56	pT1c, pN0(i-), pM0	1	pT1c, pN0(i-), pM0	0	F	Invasive ductal adenocarcinoma	8500/3: Infiltrating duct carcinoma, NOS	1	2	Moderately differentiated	Frozen	positive/positive	positive	Post menopausal		10.9896	11.0381	-0.048497	-5.92119e-16
RebeccaRepeat	Br 2 LDA 9-28-09 Plate 2	E10	T09-023-003	Invasive Carcinoma	18S-Hs99999901_s1	2	WVUTB	56	pT1c, pN0(i-), pM0	1	pT1c, pN0(i-), pM0	0	F	Invasive ductal adenocarcinoma	8500/3: Infiltrating duct carcinoma, NOS	1	2	Moderately differentiated	Frozen	positive/positive	positive	Post menopausal		11.0552	11.0381	0.017095
RebeccaRepeat	Br 2 LDA 9-28-09 Plate 2	E12	T09-023-003	Invasive Carcinoma	18S-Hs99999901_s1	3	WVUTB	56	pT1c, pN0(i-), pM0	1	pT1c, pN0(i-), pM0	0	F	Invasive ductal adenocarcinoma	8500/3: Infiltrating duct carcinoma, NOS	1	2	Moderately differentiated	Frozen	positive/positive	positive	Post menopausal		11.0695	11.0381	0.031402
RebeccaRepeat	Br 2 LDA 9-28-09 Plate 2	M12	T09-034-002	Invasive Carcinoma	18S-Hs99999901_s1	1	WVUTB	51	pT1c, pN0, pM0	1	pT1c, pN0, pM0	0	F	Invasive lobular carcinoma	8524/3: Infiltrating lobular mixed with other types of ca.	1	2	Moderately differentiated	Frozen	positive/positive	negative	perimenopausal		10.7629	10.7996	-0.0366717	-1.77636e-15
RebeccaRepeat	Br 2 LDA 9-28-09 Plate 2	M10	T09-034-002	Invasive Carcinoma	18S-Hs99999901_s1	2	WVUTB	51	pT1c, pN0, pM0	1	pT1c, pN0, pM0	0	F	Invasive lobular carcinoma	8524/3: Infiltrating lobular mixed with other types of ca.	1	2	Moderately differentiated	Frozen	positive/positive	negative	perimenopausal		10.8058	10.7996	0.00620333
RebeccaRepeat	Br 2 LDA 9-28-09 Plate 2	M11	T09-034-002	Invasive Carcinoma	18S-Hs99999901_s1	3	WVUTB	51	pT1c, pN0, pM0	1	pT1c, pN0, pM0	0	F	Invasive lobular carcinoma	8524/3: Infiltrating lobular mixed with other types of ca.	1	2	Moderately differentiated	Frozen	positive/positive	negative	perimenopausal		10.83	10.7996	0.0304683
2 RebeccaRepeat	Br 2 LDA 11-16-09 Plate 1	I11	T09-035-001	Invasive Carcinoma	18S-Hs99999901_s1	1	WVUTB	78	pT2, pN0(i-), pM0	2A	pT2, pN0(i-), pM0	0	F	Invasive lobular carcinoma	8524/3: Infiltrating lobular mixed with other types of ca.	2	2	Moderately differentiated	Frozen	positive/negative	negative	Post menopausal		28.3	29.0066	-0.706594	-1.18424e-15
2 RebeccaRepeat	Br 2 LDA 11-16-09 Plate 1	I10	T09-035-001	Invasive Carcinoma	18S-Hs99999901_s1	2	WVUTB	78	pT2, pN0(i-), pM0	2A	pT2, pN0(i-), pM0	0	F	Invasive lobular carcinoma	8524/3: Infiltrating lobular mixed with other types of ca.	2	2	Moderately differentiated	Frozen	positive/negative	negative	Post menopausal		28.8696	29.0066	-0.136959
2 RebeccaRepeat	Br 2 LDA 11-16-09 Plate 1	I12	T09-035-001	Invasive Carcinoma	18S-Hs99999901_s1	3	WVUTB	78	pT2, pN0(i-), pM0	2A	pT2, pN0(i-), pM0	0	F	Invasive lobular carcinoma	8524/3: Infiltrating lobular mixed with other types of ca.	2	2	Moderately differentiated	Frozen	positive/negative	negative	Post menopausal		29.8501	29.0066	0.843554
2 RebeccaRepeat	Br 2 LDA 11-18-09 Plate 2	A10	T09-047-003	Invasive Carcinoma	18S-Hs99999901_s1	1	WVUTB	51	pT1c pN0(i-),pM0	1A	pT1c pN0(i-),pM0	0	F	Mucinous carcinoma	8480/3: Mucinous adenocarcinoma	1	2	Moderately differentiated	Frozen	positive/positive	negative			9.52295	9.77874	-0.255793	-1.18424e-15
2 RebeccaRepeat	Br 2 LDA 11-18-09 Plate 2	A12	T09-047-003	Invasive Carcinoma	18S-Hs99999901_s1	2	WVUTB	51	pT1c pN0(i-),pM0	1A	pT1c pN0(i-),pM0	0	F	Mucinous carcinoma	8480/3: Mucinous adenocarcinoma	1	2	Moderately differentiated	Frozen	positive/positive	negative			9.84508	9.77874	0.0663397
2 RebeccaRepeat	Br 2 LDA 11-18-09 Plate 2	A11	T09-047-003	Invasive Carcinoma	18S-Hs99999901_s1	3	WVUTB	51	pT1c pN0(i-),pM0	1A	pT1c pN0(i-),pM0	0	F	Mucinous carcinoma	8480/3: Mucinous adenocarcinoma	1	2	Moderately differentiated	Frozen	positive/positive	negative			9.96819	9.77874	0.189454
2 RebeccaRepeat	Br 2 LDA 11-18-09 Plate 2	I11	T09-064-001	Invasive Carcinoma	18S-Hs99999901_s1	1	WVUTB	44	pT1c, N1a, M0	2A	pT1c, N1a, M0	1	F	Invasive ductal carcinoma	8500/3: Infiltrating duct carcinoma, NOS	2	2	Moderately differentiated	Frozen	positive/positive	negative	Pre menopausal		10.4228	10.4652	-0.0423992	-5.92119e-16
2 RebeccaRepeat	Br 2 LDA 11-18-09 Plate 2	I10	T09-064-001	Invasive Carcinoma	18S-Hs99999901_s1	2	WVUTB	44	pT1c, N1a, M0	2A	pT1c, N1a, M0	1	F	Invasive ductal carcinoma	8500/3: Infiltrating duct carcinoma, NOS	2	2	Moderately differentiated	Frozen	positive/positive	negative	Pre menopausal		10.4508	10.4652	-0.0144382
2 RebeccaRepeat	Br 2 LDA 11-18-09 Plate 2	I12	T09-064-001	Invasive Carcinoma	18S-Hs99999901_s1	3	WVUTB	44	pT1c, N1a, M0	2A	pT1c, N1a, M0	1	F	Invasive ductal carcinoma	8500/3: Infiltrating duct carcinoma, NOS	2	2	Moderately differentiated	Frozen	positive/positive	negative	Pre menopausal		10.5221	10.4652	0.0568373
RebeccaRepeat	Br 2 LDA 9-28-09 Plate 1	M12	T09-089-001	Invasive Carcinoma	18S-Hs99999901_s1	1	WVUTB	62	pT1c, N0, M0	1A	pT1c, N0, M0	0	F	Residual infiltrating ductal carcinoma	8500/3: Infiltrating duct carcinoma, NOS	1	2	Moderately differentiated	Frozen	positive/negative	positive			10.9007	10.9515	-0.050771	5.92119e-16
RebeccaRepeat	Br 2 LDA 9-28-09 Plate 1	M10	T09-089-001	Invasive Carcinoma	18S-Hs99999901_s1	2	WVUTB	62	pT1c, N0, M0	1A	pT1c, N0, M0	0	F	Residual infiltrating ductal carcinoma	8500/3: Infiltrating duct carcinoma, NOS	1	2	Moderately differentiated	Frozen	positive/negative	positive			10.9716	10.9515	0.020101
RebeccaRepeat	Br 2 LDA 9-28-09 Plate 1	M11	T09-089-001	Invasive Carcinoma	18S-Hs99999901_s1	3	WVUTB	62	pT1c, N0, M0	1A	pT1c, N0, M0	0	F	Residual infiltrating ductal carcinoma	8500/3: Infiltrating duct carcinoma, NOS	1	2	Moderately differentiated	Frozen	positive/negative	positive			10.9822	10.9515	0.03067
Rebecca	Br 2 LDA 12-7-09 Plate 1	I10	T09-122-007	Invasive Carcinoma	18S-Hs99999901_s1	1	WVUTB	51	T2,N0,M0	2A	T2,N0,M0	0	F	Infiltrating Ductal Carcinoma	8500/3: Infiltrating duct carcinoma, NOS	2	3	Poorly Differentiated	Frozen	positive/positive	positive			9.27103	9.32693	-0.055894	0
Rebecca	Br 2 LDA 12-7-09 Plate 1	I11	T09-122-007	Invasive Carcinoma	18S-Hs99999901_s1	2	WVUTB	51	T2,N0,M0	2A	T2,N0,M0	0	F	Infiltrating Ductal Carcinoma	8500/3: Infiltrating duct carcinoma, NOS	2	3	Poorly Differentiated	Frozen	positive/positive	positive			9.3173	9.32693	-0.00963
Rebecca	Br 2 LDA 12-7-09 Plate 1	I12	T09-122-007	Invasive Carcinoma	18S-Hs99999901_s1	3	WVUTB	51	T2,N0,M0	2A	T2,N0,M0	0	F	Infiltrating Ductal Carcinoma	8500/3: Infiltrating duct carcinoma, NOS	2	3	Poorly Differentiated	Frozen	positive/positive	positive			9.39245	9.32693	0.065524
2 RebeccaRepeat	Br 2 LDA 11-18-09 Plate 2	M10	T09-138-002	Invasive Carcinoma	18S-Hs99999901_s1	1	WVUTB	70	T2pN0M0	2A	T2pN0M0	0	F	Infiltrating Ductal Carcinoma	8500/3: Infiltrating duct carcinoma, NOS	2	3	Poorly Differentiated	Frozen	negative/negative	negative	Post menopausal		8.80724	8.82736	-0.0201223	0
2 RebeccaRepeat	Br 2 LDA 11-18-09 Plate 2	M11	T09-138-002	Invasive Carcinoma	18S-Hs99999901_s1	2	WVUTB	70	T2pN0M0	2A	T2pN0M0	0	F	Infiltrating Ductal Carcinoma	8500/3: Infiltrating duct carcinoma, NOS	2	3	Poorly Differentiated	Frozen	negative/negative	negative	Post menopausal		8.81076	8.82736	-0.0165953
2 RebeccaRepeat	Br 2 LDA 11-18-09 Plate 2	M12	T09-138-002	Invasive Carcinoma	18S-Hs99999901_s1	3	WVUTB	70	T2pN0M0	2A	T2pN0M0	0	F	Infiltrating Ductal Carcinoma	8500/3: Infiltrating duct carcinoma, NOS	2	3	Poorly Differentiated	Frozen	negative/negative	negative	Post menopausal		8.86407	8.82736	0.0367177
Rebecca	Br 2 LDA 12-7-09 Plate 1	M10	T09-141-002	Invasive Carcinoma	18S-Hs99999901_s1	1	WVUTB	75	pT2pN1aM0	2B	pT2pN1aM0	1	F	Invasive ductal carcinoma	8500/3: Infiltrating duct carcinoma, NOS	2	3	Poorly Differentiated	Frozen	negative/negative	negative	Post menopausal		8.96246	8.92162	0.0408447	-5.92119e-16
Rebecca	Br 2 LDA 12-7-09 Plate 1	M11	T09-141-002	Invasive Carcinoma	18S-Hs99999901_s1	2	WVUTB	75	pT2pN1aM0	2B	pT2pN1aM0	1	F	Invasive ductal carcinoma	8500/3: Infiltrating duct carcinoma, NOS	2	3	Poorly Differentiated	Frozen	negative/negative	negative	Post menopausal		8.83587	8.92162	-0.0857533
Rebecca	Br 2 LDA 12-7-09 Plate 1	M12	T09-141-002	Invasive Carcinoma	18S-Hs99999901_s1	3	WVUTB	75	pT2pN1aM0	2B	pT2pN1aM0	1	F	Invasive ductal carcinoma	8500/3: Infiltrating duct carcinoma, NOS	2	3	Poorly Differentiated	Frozen	negative/negative	negative	Post menopausal		8.96653	8.92162	0.0449087
Rebecca	Br 2 LDA 12-7-09 Plate 1	E10	T09-142-003	Invasive Carcinoma	18S-Hs99999901_s1	1	WVUTB	37	pT2N3aM0	3C	pT2N3aM0	1	F	Infiltrating Ductal Carcinoma	8500/3: Infiltrating duct carcinoma, NOS	3	3	Poorly Differentiated	Frozen	negative/negative	negative			9.06054	9.15739	-0.0968537	0
Rebecca	Br 2 LDA 12-7-09 Plate 1	E11	T09-142-003	Invasive Carcinoma	18S-Hs99999901_s1	2	WVUTB	37	pT2N3aM0	3C	pT2N3aM0	1	F	Infiltrating Ductal Carcinoma	8500/3: Infiltrating duct carcinoma, NOS	3	3	Poorly Differentiated	Frozen	negative/negative	negative			9.36125	9.15739	0.203852
Rebecca	Br 2 LDA 12-7-09 Plate 1	E12	T09-142-003	Invasive Carcinoma	18S-Hs99999901_s1	3	WVUTB	37	pT2N3aM0	3C	pT2N3aM0	1	F	Infiltrating Ductal Carcinoma	8500/3: Infiltrating duct carcinoma, NOS	3	3	Poorly Differentiated	Frozen	negative/negative	negative			9.0504	9.15739	-0.106999
Rebecca	Br 2 LDA 12-7-09 Plate 1	A10	T09-150-004	Invasive Carcinoma	18S-Hs99999901_s1	1	WVUTB	82	pT2N1aM0	2B	pT2N1aM0	1	F	Invasive Ductal Carcinoma	8500/3: Infiltrating duct carcinoma, NOS	2	2	Moderately Differentiated	Frozen	positive/positive	negative	Post menopausal		10.2477	10.3239	-0.0762007	-5.92119e-16
Rebecca	Br 2 LDA 12-7-09 Plate 1	A11	T09-150-004	Invasive Carcinoma	18S-Hs99999901_s1	2	WVUTB	82	pT2N1aM0	2B	pT2N1aM0	1	F	Invasive Ductal Carcinoma	8500/3: Infiltrating duct carcinoma, NOS	2	2	Moderately Differentiated	Frozen	positive/positive	negative	Post menopausal		10.2834	10.3239	-0.0405727
Rebecca	Br 2 LDA 12-7-09 Plate 1	A12	T09-150-004	Invasive Carcinoma	18S-Hs99999901_s1	3	WVUTB	82	pT2N1aM0	2B	pT2N1aM0	1	F	Invasive Ductal Carcinoma	8500/3: Infiltrating duct carcinoma, NOS	2	2	Moderately Differentiated	Frozen	positive/positive	negative	Post menopausal		10.4407	10.3239	0.116773
RebeccaRepeat	Br 2 LDA 9-25-09 Plate 1	M11	Z3588A1B	Invasive Carcinoma	18S-Hs99999901_s1	1	CHTN	NA	pT3, pN1, M1	4	pT3, pN1, M1	1	missing	Invasive Ductal Carcinoma	8500/3: Infiltrating duct carcinoma, NOS	4	3	Poorly Differentiated	Frozen & Paraffin					9.95661	10.0368	-0.0802285	0
RebeccaRepeat	Br 2 LDA 9-25-09 Plate 1	M10	Z3588A1B	Invasive Carcinoma	18S-Hs99999901_s1	2	CHTN	NA	pT3, pN1, M1	4	pT3, pN1, M1	1	missing	Invasive Ductal Carcinoma	8500/3: Infiltrating duct carcinoma, NOS	4	3	Poorly Differentiated	Frozen & Paraffin					9.99274	10.0368	-0.0440945
RebeccaRepeat	Br 2 LDA 9-25-09 Plate 1	M12	Z3588A1B	Invasive Carcinoma	18S-Hs99999901_s1	3	CHTN	NA	pT3, pN1, M1	4	pT3, pN1, M1	1	missing	Invasive Ductal Carcinoma	8500/3: Infiltrating duct carcinoma, NOS	4	3	Poorly Differentiated	Frozen & Paraffin					10.1612	10.0368	0.124323
2 RebeccaRepeat	Br 2 LDA 11-9-09 Plate 1	E10	Z3740A1A	Invasive Carcinoma	18S-Hs99999901_s1	1	CHTN	Missing	T3N0M0	2B	T3N0M0	0	missing	Metaplastic carcinoma with chondrosarcomatous elements	8010/3: Carcinoma, NOS	2	3	Poorly differentiated						19.8953	19.9441	-0.0487847	1.18424e-15
2 RebeccaRepeat	Br 2 LDA 11-9-09 Plate 1	E11	Z3740A1A	Invasive Carcinoma	18S-Hs99999901_s1	2	CHTN	Missing	T3N0M0	2B	T3N0M0	0	missing	Metaplastic carcinoma with chondrosarcomatous elements	8010/3: Carcinoma, NOS	2	3	Poorly differentiated						19.9596	19.9441	0.0154503
2 RebeccaRepeat	Br 2 LDA 11-9-09 Plate 1	E12	Z3740A1A	Invasive Carcinoma	18S-Hs99999901_s1	3	CHTN	Missing	T3N0M0	2B	T3N0M0	0	missing	Metaplastic carcinoma with chondrosarcomatous elements	8010/3: Carcinoma, NOS	2	3	Poorly differentiated						19.9775	19.9441	0.0333343
2 RebeccaRepeat	Br 2 LDA 11-9-09 Plate 1	I10	Z3841A1A	Invasive Carcinoma	18S-Hs99999901_s1	1	CHTN	Missing	T2N0M0	2A	T2N0M0	0	missing	Invasive Ductal Carcinoma	8500/3: Infiltrating duct carcinoma, NOS	2	3	Poorly Differentiated	Frozen & Paraffin	ordered	ordered			19.6124	19.6333	-0.020908	0
2 RebeccaRepeat	Br 2 LDA 11-9-09 Plate 1	I12	Z3841A1A	Invasive Carcinoma	18S-Hs99999901_s1	2	CHTN	Missing	T2N0M0	2A	T2N0M0	0	missing	Invasive Ductal Carcinoma	8500/3: Infiltrating duct carcinoma, NOS	2	3	Poorly Differentiated	Frozen & Paraffin	ordered	ordered			19.6334	19.6333	0.000148
2 RebeccaRepeat	Br 2 LDA 11-9-09 Plate 1	I11	Z3841A1A	Invasive Carcinoma	18S-Hs99999901_s1	3	CHTN	Missing	T2N0M0	2A	T2N0M0	0	missing	Invasive Ductal Carcinoma	8500/3: Infiltrating duct carcinoma, NOS	2	3	Poorly Differentiated	Frozen & Paraffin	ordered	ordered			19.654	19.6333	0.02076
RebeccaLast	Br 2 LDA 1-7-10 Plate 1	A10	Z4142 A1F	Invasive Carcinoma	18S-Hs99999901_s1	1	CHTN	NA	T3N1M0	3A	T3N1M0	1	F	Invasive Ductal Carcinoma	8500/3: Infiltrating duct carcinoma, NOS	3	3	Poorly Differentiated	Frozen & Paraffin	positive/positive	positive			12.6989	13.2076	-0.508699	-5.92119e-16
RebeccaLast	Br 2 LDA 1-7-10 Plate 1	A11	Z4142 A1F	Invasive Carcinoma	18S-Hs99999901_s1	2	CHTN	NA	T3N1M0	3A	T3N1M0	1	F	Invasive Ductal Carcinoma	8500/3: Infiltrating duct carcinoma, NOS	3	3	Poorly Differentiated	Frozen & Paraffin	positive/positive	positive			12.9224	13.2076	-0.285173
RebeccaLast	Br 2 LDA 1-7-10 Plate 1	A12	Z4142 A1F	Invasive Carcinoma	18S-Hs99999901_s1	3	CHTN	NA	T3N1M0	3A	T3N1M0	1	F	Invasive Ductal Carcinoma	8500/3: Infiltrating duct carcinoma, NOS	3	3	Poorly Differentiated	Frozen & Paraffin	positive/positive	positive			14.0015	13.2076	0.793872
Jill	10-06-08 Samples 22-25Maricicass12-16	I10	1060163B3	normal	18S-Hs99999901_s1	1	CHTN	65				normal				normal								7.72245	7.6645	0.0579559	-5.92119e-16	-1.97373e-16	8.49976e-16
Jill	10-06-08 Samples 22-25Maricicass12-16	I11	1060163B3	normal	18S-Hs99999901_s1	2	CHTN	65				normal				normal								7.55871	7.6645	-0.105784
Jill	10-06-08 Samples 22-25Maricicass12-16	I12	1060163B3	normal	18S-Hs99999901_s1	3	CHTN	65				normal				normal								7.71232	7.6645	0.0478276
Rebecca	Br 2 LDA 8-27-09 Plate 1	A11	3061119C4	normal	18S-Hs99999901_s1	1	CHTN	74				normal	F			normal			Frozen					10.4696	10.5695	-0.0999567	-5.92119e-16
Rebecca	Br 2 LDA 8-27-09 Plate 1	A10	3061119C4	normal	18S-Hs99999901_s1	2	CHTN	74				normal	F			normal			Frozen					10.6183	10.5695	0.0488053
Rebecca	Br 2 LDA 8-27-09 Plate 1	A12	3061119C4	normal	18S-Hs99999901_s1	3	CHTN	74				normal	F			normal			Frozen					10.6207	10.5695	0.0511513
Rebecca	Br 2 LDA 8-21-09 Plate 1	E10	3062104B6	normal	18S-Hs99999901_s1	1	CHTN	52				normal	F			normal								9.53735	9.61416	-0.0768067	0
Rebecca	Br 2 LDA 8-21-09 Plate 1	E12	3062104B6	normal	18S-Hs99999901_s1	2	CHTN	52				normal	F			normal								9.62333	9.61416	0.00917533
Rebecca	Br 2 LDA 8-21-09 Plate 1	E11	3062104B6	normal	18S-Hs99999901_s1	3	CHTN	52				normal	F			normal								9.68179	9.61416	0.0676313
Rebecca	Br 2 LDA 8-25-09 Plate 1	I12	4060634B10	normal	18S-Hs99999901_s1	1	CHTN	79				normal	F			normal			Frozen					10.844	10.8951	-0.0511907	1.18424e-15
Rebecca	Br 2 LDA 8-25-09 Plate 1	I11	4060634B10	normal	18S-Hs99999901_s1	2	CHTN	79				normal	F			normal			Frozen					10.8447	10.8951	-0.0504047
Rebecca	Br 2 LDA 8-25-09 Plate 1	I10	4060634B10	normal	18S-Hs99999901_s1	3	CHTN	79				normal	F			normal			Frozen					10.9967	10.8951	0.101595
Rebecca	Br 2 LDA 8-25-09 Plate 1	A12	T07-081-003	normal	18S-Hs99999901_s1	1	WVUTB	40				normal	F			normal								10.4296	10.489	-0.059395	1.18424e-15
Rebecca	Br 2 LDA 8-25-09 Plate 1	A10	T07-081-003	normal	18S-Hs99999901_s1	2	WVUTB	40				normal	F			normal								10.4553	10.489	-0.033684
Rebecca	Br 2 LDA 8-25-09 Plate 1	A11	T07-081-003	normal	18S-Hs99999901_s1	3	WVUTB	40				normal	F			normal								10.5821	10.489	0.093079
Rebecca	Br 2 LDA 8-25-09 Plate 1	E11	T07-197-003	normal	18S-Hs99999901_s1	1	WVUTB	43				normal	F			normal			Frozen					10.9376	10.9588	-0.021252	-1.18424e-15
Rebecca	Br 2 LDA 8-25-09 Plate 1	E12	T07-197-003	normal	18S-Hs99999901_s1	2	WVUTB	43				normal	F			normal			Frozen					10.9614	10.9588	0.002518
Rebecca	Br 2 LDA 8-25-09 Plate 1	E10	T07-197-003	normal	18S-Hs99999901_s1	3	WVUTB	43				normal	F			normal			Frozen					10.9776	10.9588	0.018734
Rebecca	Br 2 LDA 8-27-09 Plate 1	I10	T09-045-001	normal	18S-Hs99999901_s1	1	WVUTB	39				normal	F			normal			Frozen					8.65296	8.89414	-0.241188	0
Rebecca	Br 2 LDA 8-27-09 Plate 1	I12	T09-045-001	normal	18S-Hs99999901_s1	2	WVUTB	39				normal	F			normal			Frozen					8.94868	8.89414	0.0545333
Rebecca	Br 2 LDA 8-27-09 Plate 1	I11	T09-045-001	normal	18S-Hs99999901_s1	3	WVUTB	39				normal	F			normal			Frozen					9.0808	8.89414	0.186654
Rebecca	Br 2 LDA 8-27-09 Plate 1	M12	T09-047-002	normal	18S-Hs99999901_s1	1	WVUTB	51				normal	F			normal			Frozen					9.94541	9.98865	-0.0432357	-5.92119e-16
Rebecca	Br 2 LDA 8-27-09 Plate 1	M10	T09-047-002	normal	18S-Hs99999901_s1	2	WVUTB	51				normal	F			normal			Frozen					9.96869	9.98865	-0.0199557
Rebecca	Br 2 LDA 8-27-09 Plate 1	M11	T09-047-002	normal	18S-Hs99999901_s1	3	WVUTB	51				normal	F			normal			Frozen					10.0518	9.98865	0.0631913
Rebecca	Br 2 LDA 8-27-09 Plate 1	E11	T09-064-003	normal	18S-Hs99999901_s1	1	WVUTB	44				normal	F			normal			Frozen					9.59519	9.73424	-0.139059	0
Rebecca	Br 2 LDA 8-27-09 Plate 1	E10	T09-064-003	normal	18S-Hs99999901_s1	2	WVUTB	44				normal	F			normal			Frozen					9.76547	9.73424	0.031224
Rebecca	Br 2 LDA 8-27-09 Plate 1	E12	T09-064-003	normal	18S-Hs99999901_s1	3	WVUTB	44				normal	F			normal			Frozen					9.84208	9.73424	0.107835
Rebecca	Br 2 LDA 12-8-09 Plate 1	M10	T09-089-002	normal	18S-Hs99999901_s1	1	WVUTB	62				normal				normal			Frozen					12.8685	12.8687	-0.000177	-1.18424e-15
Rebecca	Br 2 LDA 12-8-09 Plate 1	M11	T09-089-002	normal	18S-Hs99999901_s1	2	WVUTB	62				normal				normal			Frozen					12.7573	12.8687	-0.111448
Rebecca	Br 2 LDA 12-8-09 Plate 1	M12	T09-089-002	normal	18S-Hs99999901_s1	3	WVUTB	62				normal				normal			Frozen					12.9803	12.8687	0.111625
Rebecca	Br 2 LDA 12-8-09 Plate 1	A10	T09-122-002	normal	18S-Hs99999901_s1	1	WVUTB	51				normal				normal			Frozen					11.1923	11.4183	-0.226046	-1.18424e-15
Rebecca	Br 2 LDA 12-8-09 Plate 1	A11	T09-122-002	normal	18S-Hs99999901_s1	2	WVUTB	51				normal				normal			Frozen					11.3777	11.4183	-0.0406007
Rebecca	Br 2 LDA 12-8-09 Plate 1	A12	T09-122-002	normal	18S-Hs99999901_s1	3	WVUTB	51				normal				normal			Frozen					11.685	11.4183	0.266646
Rebecca	Br 2 LDA 8-24-09 Plate 1	M11	Z3841A2A	normal	18S-Hs99999901_s1	1	CHTN	Missing				normal	missing			normal			Frozen & Paraffin					9.91259	9.94032	-0.0277297	5.92119e-16
Rebecca	Br 2 LDA 8-24-09 Plate 1	M12	Z3841A2A	normal	18S-Hs99999901_s1	2	CHTN	Missing				normal	missing			normal			Frozen & Paraffin					9.93923	9.94032	-0.00109167
Rebecca	Br 2 LDA 8-24-09 Plate 1	M10	Z3841A2A	normal	18S-Hs99999901_s1	3	CHTN	Missing				normal	missing			normal			Frozen & Paraffin					9.96914	9.94032	0.0288213
2 RebeccaRepeat	Br 2 LDA 11-10-09 Plate 1	M11	1082304A4	Sarcoma	18S-Hs99999901_s1	1	CHTN	79	T4, N0,M0	3B	T4, N0,M0	0	F	Spindle Cell Sarcoma	8801/3: Spindle cell sarcoma	3	2	Moderately Differentiated		negative/negative	negative			5.07425	5.72147	-0.647216	0	2.96059e-16	4.18691e-16	1	0.297546
2 RebeccaRepeat	Br 2 LDA 11-10-09 Plate 1	M12	1082304A4	Sarcoma	18S-Hs99999901_s1	2	CHTN	79	T4, N0,M0	3B	T4, N0,M0	0	F	Spindle Cell Sarcoma	8801/3: Spindle cell sarcoma	3	2	Moderately Differentiated		negative/negative	negative			5.35783	5.72147	-0.363638
2 RebeccaRepeat	Br 2 LDA 11-10-09 Plate 1	M10	1082304A4	Sarcoma	18S-Hs99999901_s1	3	CHTN	79	T4, N0,M0	3B	T4, N0,M0	0	F	Spindle Cell Sarcoma	8801/3: Spindle cell sarcoma	3	2	Moderately Differentiated		negative/negative	negative			6.73232	5.72147	1.01085
RebeccaRepeat	Br 2 LDA 9-29-09 Plate 1	E10	T04-104-006	Sarcoma	18S-Hs99999901_s1	1	WVUTB	56	T4, N0, M0	1	T4, N0, M0	0	F	Recurrent Cystosarcoma Phyllodes		1	N/A	N/A	Frozen					10.1767	10.2202	-0.0434767	5.92119e-16
RebeccaRepeat	Br 2 LDA 9-29-09 Plate 1	E11	T04-104-006	Sarcoma	18S-Hs99999901_s1	2	WVUTB	56	T4, N0, M0	1	T4, N0, M0	0	F	Recurrent Cystosarcoma Phyllodes		1	N/A	N/A	Frozen					10.2412	10.2202	0.0209663
RebeccaRepeat	Br 2 LDA 9-29-09 Plate 1	E12	T04-104-006	Sarcoma	18S-Hs99999901_s1	3	WVUTB	56	T4, N0, M0	1	T4, N0, M0	0	F	Recurrent Cystosarcoma Phyllodes		1	N/A	N/A	Frozen					10.2427	10.2202	0.0225103
Jill	10-09-08 Samples 50-53s40-44	G1	T0426310	DCIS	ACOT4-Hs00745041_s1	1	WVUTB	63		0		0		DCIS		0	3	Poorly differentiated						29.3988	8.64477	20.754	20.7857	19.9004	1.37875	1.57632	0.524987
Jill	10-09-08 Samples 50-53s40-44	G2	T0426310	DCIS	ACOT4-Hs00745041_s1	2	WVUTB	63		0		0		DCIS		0	3	Poorly differentiated						29.3362	8.64477	20.6914
Jill	10-09-08 Samples 50-53s40-44	G3	T0426310	DCIS	ACOT4-Hs00745041_s1	3	WVUTB	63		0		0		DCIS		0	3	Poorly differentiated						29.5565	8.64477	20.9117
Jill	10-07-08 Samples 26-29s-17-20	G1	T06449	DCIS	ACOT4-Hs00745041_s1	1	WVUTB	56		0		0		DCIS		0	3	Poorly differentiated						28.8561	8.26771	20.5884	20.6037
Jill	10-07-08 Samples 26-29s-17-20	G2	T06449	DCIS	ACOT4-Hs00745041_s1	2	WVUTB	56		0		0		DCIS		0	3	Poorly differentiated						28.9964	8.26771	20.7287
Jill	10-07-08 Samples 26-29s-17-20	G3	T06449	DCIS	ACOT4-Hs00745041_s1	3	WVUTB	56		0		0		DCIS		0	3	Poorly differentiated						28.7616	8.26771	20.4939
2 RebeccaRepeat	Br 2 LDA 11-18-09 Plate 2	G4	T09-045-003	DCIS	ACOT4-Hs00745041_s1	1	WVUTB	39	pTis, pN1mi, pMx	0	pTis, pN1mi, pMx	0	F	DCIS		0	1	Well-Differentiated	Frozen	negative / negative	not addressed			28.7451	10.5131	18.2321	18.3118
2 RebeccaRepeat	Br 2 LDA 11-18-09 Plate 2	G6	T09-045-003	DCIS	ACOT4-Hs00745041_s1	2	WVUTB	39	pTis, pN1mi, pMx	0	pTis, pN1mi, pMx	0	F	DCIS		0	1	Well-Differentiated	Frozen	negative / negative	not addressed			28.7507	10.5131	18.2376
2 RebeccaRepeat	Br 2 LDA 11-18-09 Plate 2	G5	T09-045-003	DCIS	ACOT4-Hs00745041_s1	3	WVUTB	39	pTis, pN1mi, pMx	0	pTis, pN1mi, pMx	0	F	DCIS		0	1	Well-Differentiated	Frozen	negative / negative	not addressed			28.9789	10.5131	18.4658
Jill	10-02-08 Samples 9-12	C1	1060163A9	Invasive Carcinoma	ACOT4-Hs00745041_s1	1	CHTN	65	T2N0M0	2A	T2N0M0	0		invasive ductal carcinoma	8500/3: Infiltrating duct carcinoma, NOS	2	3	Poorly differentiated		negative/negative	intermediate: test to be repeated	Postmenopausal		27.4125	9.98487	17.4276	16.8861	18.1731	3.74069	5.2195	0.00149467
Jill	10-02-08 Samples 9-12	C2	1060163A9	Invasive Carcinoma	ACOT4-Hs00745041_s1	2	CHTN	65	T2N0M0	2A	T2N0M0	0		invasive ductal carcinoma	8500/3: Infiltrating duct carcinoma, NOS	2	3	Poorly differentiated		negative/negative	intermediate: test to be repeated	Postmenopausal		27.0026	9.98487	17.0178
Jill	10-02-08 Samples 9-12	C3	1060163A9	Invasive Carcinoma	ACOT4-Hs00745041_s1	3	CHTN	65	T2N0M0	2A	T2N0M0	0		invasive ductal carcinoma	8500/3: Infiltrating duct carcinoma, NOS	2	3	Poorly differentiated		negative/negative	intermediate: test to be repeated	Postmenopausal		26.1977	9.98487	16.2129
RebeccaRepeat	Br 2 LDA 9-29-09 Plate 1	C5	1060568A18	Invasive Carcinoma	ACOT4-Hs00745041_s1	1	CHTN	50	T4, N1, M0	3B	T4, N1, M0	1	F	Invasive ductal carcinoma	8500/3: Infiltrating duct carcinoma, NOS	3	3	Poorly differentiated		positive/negative	negative			28.86	10.3972	18.4628	18.53
RebeccaRepeat	Br 2 LDA 9-29-09 Plate 1	C6	1060568A18	Invasive Carcinoma	ACOT4-Hs00745041_s1	2	CHTN	50	T4, N1, M0	3B	T4, N1, M0	1	F	Invasive ductal carcinoma	8500/3: Infiltrating duct carcinoma, NOS	3	3	Poorly differentiated		positive/negative	negative			28.9313	10.3972	18.5341
RebeccaRepeat	Br 2 LDA 9-29-09 Plate 1	C4	1060568A18	Invasive Carcinoma	ACOT4-Hs00745041_s1	3	CHTN	50	T4, N1, M0	3B	T4, N1, M0	1	F	Invasive ductal carcinoma	8500/3: Infiltrating duct carcinoma, NOS	3	3	Poorly differentiated		positive/negative	negative			28.9904	10.3972	18.5932
Jill	10-06-08 Samples 18-21s-09-12	C1	1060950A1	Invasive Carcinoma	ACOT4-Hs00745041_s1	1	CHTN	63	T1cN0M0	1A	T1cN0M0	0		infiltrating ductal carcinoma, cribriform subtype	8500/3: Infiltrating duct carcinoma, NOS	1	1	Well-differentiated		positive/positive	negative			26.3295	6.92383	19.4057	19.5854
Jill	10-06-08 Samples 18-21s-09-12	C2	1060950A1	Invasive Carcinoma	ACOT4-Hs00745041_s1	2	CHTN	63	T1cN0M0	1A	T1cN0M0	0		infiltrating ductal carcinoma, cribriform subtype	8500/3: Infiltrating duct carcinoma, NOS	1	1	Well-differentiated		positive/positive	negative			26.4124	6.92383	19.4886
Jill	10-06-08 Samples 18-21s-09-12	C3	1060950A1	Invasive Carcinoma	ACOT4-Hs00745041_s1	3	CHTN	63	T1cN0M0	1A	T1cN0M0	0		infiltrating ductal carcinoma, cribriform subtype	8500/3: Infiltrating duct carcinoma, NOS	1	1	Well-differentiated		positive/positive	negative			26.7859	6.92383	19.8621
Jill	10-06-08 Samples 13-16-s-08-09	C1	1061053A1	Invasive Carcinoma	ACOT4-Hs00745041_s1	1	CHTN	36	T3N1aM0	3A	T3N1aM0	1		infiltrating ductal carcinoma	8500/3: Infiltrating duct carcinoma, NOS	3	2	Moderately differentiated		positive/positive	(+1) probably negative	Premenopausal		23.6041	6.34086	17.2632	17.6206
Jill	10-06-08 Samples 13-16-s-08-09	C2	1061053A1	Invasive Carcinoma	ACOT4-Hs00745041_s1	2	CHTN	36	T3N1aM0	3A	T3N1aM0	1		infiltrating ductal carcinoma	8500/3: Infiltrating duct carcinoma, NOS	3	2	Moderately differentiated		positive/positive	(+1) probably negative	Premenopausal		24.3446	6.34086	18.0037
Jill	10-06-08 Samples 13-16-s-08-09	C3	1061053A1	Invasive Carcinoma	ACOT4-Hs00745041_s1	3	CHTN	36	T3N1aM0	3A	T3N1aM0	1		infiltrating ductal carcinoma	8500/3: Infiltrating duct carcinoma, NOS	3	2	Moderately differentiated		positive/positive	(+1) probably negative	Premenopausal		23.9356	6.34086	17.5947
RebeccaRepeat	Br 2 LDA 9-28-09 Plate 1	C4	1061562A15	Invasive Carcinoma	ACOT4-Hs00745041_s1	1	CHTN	60	T2, N0, M0	2A	T2, N0, M0	0	F	Mucinous Adenocarcinoma	8480/3: Mucinous adenocarcinoma	2	1	Well-Differentiated	Frozen & Paraffin	positive/positive	negative			28.52	9.96153	18.5585	18.7533
RebeccaRepeat	Br 2 LDA 9-28-09 Plate 1	C5	1061562A15	Invasive Carcinoma	ACOT4-Hs00745041_s1	2	CHTN	60	T2, N0, M0	2A	T2, N0, M0	0	F	Mucinous Adenocarcinoma	8480/3: Mucinous adenocarcinoma	2	1	Well-Differentiated	Frozen & Paraffin	positive/positive	negative			28.7713	9.96153	18.8098
RebeccaRepeat	Br 2 LDA 9-28-09 Plate 1	C6	1061562A15	Invasive Carcinoma	ACOT4-Hs00745041_s1	3	CHTN	60	T2, N0, M0	2A	T2, N0, M0	0	F	Mucinous Adenocarcinoma	8480/3: Mucinous adenocarcinoma	2	1	Well-Differentiated	Frozen & Paraffin	positive/positive	negative			28.8531	9.96153	18.8915
Jill	10-06-08 Samples 18-21s-09-12	O1	1061897A3	Invasive Carcinoma	ACOT4-Hs00745041_s1	1	CHTN	85	T2N2aM0	3A	T2N2aM0	1		invasive lobular carcinoma	8524/3: Infiltrating lobular mixed with other types of ca.	3	1	Well-differentiated		positive/positive	negative	Postmenopausal		28.0797	7.70997	20.3698	20.2393
Jill	10-06-08 Samples 18-21s-09-12	O2	1061897A3	Invasive Carcinoma	ACOT4-Hs00745041_s1	2	CHTN	85	T2N2aM0	3A	T2N2aM0	1		invasive lobular carcinoma	8524/3: Infiltrating lobular mixed with other types of ca.	3	1	Well-differentiated		positive/positive	negative	Postmenopausal		27.9059	7.70997	20.1959
Jill	10-06-08 Samples 18-21s-09-12	O3	1061897A3	Invasive Carcinoma	ACOT4-Hs00745041_s1	3	CHTN	85	T2N2aM0	3A	T2N2aM0	1		invasive lobular carcinoma	8524/3: Infiltrating lobular mixed with other types of ca.	3	1	Well-differentiated		positive/positive	negative	Postmenopausal		27.8623	7.70997	20.1523
RebeccaRepeat	Br 2 LDA 9-28-09 Plate 2	C4	1062323A6	Invasive Carcinoma	ACOT4-Hs00745041_s1	1	CHTN	62	T2N0M0	2A	T2N0M0	0	F	Infiltrating Ductal Carcinoma	8500/3: Infiltrating duct carcinoma, NOS	2	3	Poorly Differentiated	Frozen & Paraffin	negative/negative	negative			33.3678	8.83488	24.5329	25.7187
RebeccaRepeat	Br 2 LDA 9-28-09 Plate 2	C6	1062323A6	Invasive Carcinoma	ACOT4-Hs00745041_s1	2	CHTN	62	T2N0M0	2A	T2N0M0	0	F	Infiltrating Ductal Carcinoma	8500/3: Infiltrating duct carcinoma, NOS	2	3	Poorly Differentiated	Frozen & Paraffin	negative/negative	negative			34.2837	8.83488	25.4488
RebeccaRepeat	Br 2 LDA 9-28-09 Plate 2	C5	1062323A6	Invasive Carcinoma	ACOT4-Hs00745041_s1	3	CHTN	62	T2N0M0	2A	T2N0M0	0	F	Infiltrating Ductal Carcinoma	8500/3: Infiltrating duct carcinoma, NOS	2	3	Poorly Differentiated	Frozen & Paraffin	negative/negative	negative			36.0093	8.83488	27.1745
RebeccaRepeat	Br 2 LDA 9-28-09 Plate 1	G6	1070062A1	Invasive Carcinoma	ACOT4-Hs00745041_s1	1	CHTN	49	T2N0M0	2A	T2N0M0	0	F	Ductal Adenocarcinoma	8500/3: Infiltrating duct carcinoma, NOS	2	3	Poorly differentiated		positive/positive	negative			28.9512	9.88308	19.0681	19.2226
RebeccaRepeat	Br 2 LDA 9-28-09 Plate 1	G4	1070062A1	Invasive Carcinoma	ACOT4-Hs00745041_s1	2	CHTN	49	T2N0M0	2A	T2N0M0	0	F	Ductal Adenocarcinoma	8500/3: Infiltrating duct carcinoma, NOS	2	3	Poorly differentiated		positive/positive	negative			29.1584	9.88308	19.2753
RebeccaRepeat	Br 2 LDA 9-28-09 Plate 1	G5	1070062A1	Invasive Carcinoma	ACOT4-Hs00745041_s1	3	CHTN	49	T2N0M0	2A	T2N0M0	0	F	Ductal Adenocarcinoma	8500/3: Infiltrating duct carcinoma, NOS	2	3	Poorly differentiated		positive/positive	negative			29.2074	9.88308	19.3243
Jill	10-06-08 Samples 22-25Maricicass12-16	O1	1070512A1	Invasive Carcinoma	ACOT4-Hs00745041_s1	1	CHTN	80	T1cN0M0	1A	T1cN0M0	0		invasive ductal carcinoma	8500/3: Infiltrating duct carcinoma, NOS	1	2	Moderately differentiated		positive/positive	negative			27.6527	6.83775	20.815	21.2525
Jill	10-06-08 Samples 22-25Maricicass12-16	O2	1070512A1	Invasive Carcinoma	ACOT4-Hs00745041_s1	2	CHTN	80	T1cN0M0	1A	T1cN0M0	0		invasive ductal carcinoma	8500/3: Infiltrating duct carcinoma, NOS	1	2	Moderately differentiated		positive/positive	negative			28.2709	6.83775	21.4332
Jill	10-06-08 Samples 22-25Maricicass12-16	O3	1070512A1	Invasive Carcinoma	ACOT4-Hs00745041_s1	3	CHTN	80	T1cN0M0	1A	T1cN0M0	0		invasive ductal carcinoma	8500/3: Infiltrating duct carcinoma, NOS	1	2	Moderately differentiated		positive/positive	negative			28.3471	6.83775	21.5093
2 RebeccaRepeat	Br 2 LDA 11-18-09 Plate 1	O4	1072014A5	Invasive Carcinoma	ACOT4-Hs00745041_s1	1	CHTN	49	T3N0M0	2B	T3N0M0	0	F	Invasive ductal carcinoma	8500/3: Infiltrating duct carcinoma, NOS	2	3	Poorly differentiated		positive/positive	positive			23.4049	5.80943	17.5955	18.0834
2 RebeccaRepeat	Br 2 LDA 11-18-09 Plate 1	O5	1072014A5	Invasive Carcinoma	ACOT4-Hs00745041_s1	2	CHTN	49	T3N0M0	2B	T3N0M0	0	F	Invasive ductal carcinoma	8500/3: Infiltrating duct carcinoma, NOS	2	3	Poorly differentiated		positive/positive	positive			24.0987	5.80943	18.2892
2 RebeccaRepeat	Br 2 LDA 11-18-09 Plate 1	O6	1072014A5	Invasive Carcinoma	ACOT4-Hs00745041_s1	3	CHTN	49	T3N0M0	2B	T3N0M0	0	F	Invasive ductal carcinoma	8500/3: Infiltrating duct carcinoma, NOS	2	3	Poorly differentiated		positive/positive	positive			24.1749	5.80943	18.3655
RebeccaRepeat	Br 2 LDA 9-25-09 Plate 1	C5	1080312A4	Invasive Carcinoma	ACOT4-Hs00745041_s1	1	CHTN	71	T2N1M0	2B	T2N1M0	1	F	Invasive Ductal Carcinoma	8500/3: Infiltrating duct carcinoma, NOS	2	2	Moderately differentiated	Frozen& Paraffin	positive/positive	negative			29.9255	10.076	19.8495	20.0574
RebeccaRepeat	Br 2 LDA 9-25-09 Plate 1	C4	1080312A4	Invasive Carcinoma	ACOT4-Hs00745041_s1	2	CHTN	71	T2N1M0	2B	T2N1M0	1	F	Invasive Ductal Carcinoma	8500/3: Infiltrating duct carcinoma, NOS	2	2	Moderately differentiated	Frozen& Paraffin	positive/positive	negative			30.2321	10.076	20.1561
RebeccaRepeat	Br 2 LDA 9-25-09 Plate 1	C6	1080312A4	Invasive Carcinoma	ACOT4-Hs00745041_s1	3	CHTN	71	T2N1M0	2B	T2N1M0	1	F	Invasive Ductal Carcinoma	8500/3: Infiltrating duct carcinoma, NOS	2	2	Moderately differentiated	Frozen& Paraffin	positive/positive	negative			30.2424	10.076	20.1664
2 RebeccaRepeat	Br 2 LDA 10-26-09 Plate 2 mirVana	G5	1080502A1	Invasive Carcinoma	ACOT4-Hs00745041_s1	1	CHTN	42	T2N0M0	2A	T2N0M0	0	F	Invasive Ductal Carcinoma	8500/3: Infiltrating duct carcinoma, NOS	2	3	Poorly differentiated	Frozen& Paraffin	pending	pending			26.4101	14.3589	12.0512	12.0861
2 RebeccaRepeat	Br 2 LDA 10-26-09 Plate 2 mirVana	G6	1080502A1	Invasive Carcinoma	ACOT4-Hs00745041_s1	2	CHTN	42	T2N0M0	2A	T2N0M0	0	F	Invasive Ductal Carcinoma	8500/3: Infiltrating duct carcinoma, NOS	2	3	Poorly differentiated	Frozen& Paraffin	pending	pending			26.4301	14.3589	12.0712
2 RebeccaRepeat	Br 2 LDA 10-26-09 Plate 2 mirVana	G4	1080502A1	Invasive Carcinoma	ACOT4-Hs00745041_s1	3	CHTN	42	T2N0M0	2A	T2N0M0	0	F	Invasive Ductal Carcinoma	8500/3: Infiltrating duct carcinoma, NOS	2	3	Poorly differentiated	Frozen& Paraffin	pending	pending			26.4948	14.3589	12.1359
2 RebeccaRepeat	Br 2 LDA 10-26-09 Plate 2 mirVana	C6	1080719B5	Invasive Carcinoma	ACOT4-Hs00745041_s1	1	CHTN	64	T3N0M0	2B	T3N0M0	0	F	Invasive Ductal Carcinoma	8500/3: Infiltrating duct carcinoma, NOS	2	3	Poorly Differentiated	Frozen & Paraffin	ordered	ordered			25.822	16.0027	9.81929	9.89292
2 RebeccaRepeat	Br 2 LDA 10-26-09 Plate 2 mirVana	C5	1080719B5	Invasive Carcinoma	ACOT4-Hs00745041_s1	2	CHTN	64	T3N0M0	2B	T3N0M0	0	F	Invasive Ductal Carcinoma	8500/3: Infiltrating duct carcinoma, NOS	2	3	Poorly Differentiated	Frozen & Paraffin	ordered	ordered			25.9184	16.0027	9.91567
2 RebeccaRepeat	Br 2 LDA 10-26-09 Plate 2 mirVana	C4	1080719B5	Invasive Carcinoma	ACOT4-Hs00745041_s1	3	CHTN	64	T3N0M0	2B	T3N0M0	0	F	Invasive Ductal Carcinoma	8500/3: Infiltrating duct carcinoma, NOS	2	3	Poorly Differentiated	Frozen & Paraffin	ordered	ordered			25.9465	16.0027	9.9438
2 RebeccaRepeat	Br 2 LDA 10-26-09 Plate 2 mirVana	K5	1081454A6	Invasive Carcinoma	ACOT4-Hs00745041_s1	1	CHTN	51	T2N0M0	2A	T2N0M0	0	M	Invasive Ductal Carcinoma	8500/3: Infiltrating duct carcinoma, NOS	2	3	Poorly Differentiated	Frozen & Paraffin	positive / negative	negative			26.6417	13.9592	12.6825	12.7139
2 RebeccaRepeat	Br 2 LDA 10-26-09 Plate 2 mirVana	K4	1081454A6	Invasive Carcinoma	ACOT4-Hs00745041_s1	2	CHTN	51	T2N0M0	2A	T2N0M0	0	M	Invasive Ductal Carcinoma	8500/3: Infiltrating duct carcinoma, NOS	2	3	Poorly Differentiated	Frozen & Paraffin	positive / negative	negative			26.6493	13.9592	12.6901
2 RebeccaRepeat	Br 2 LDA 10-26-09 Plate 2 mirVana	K6	1081454A6	Invasive Carcinoma	ACOT4-Hs00745041_s1	3	CHTN	51	T2N0M0	2A	T2N0M0	0	M	Invasive Ductal Carcinoma	8500/3: Infiltrating duct carcinoma, NOS	2	3	Poorly Differentiated	Frozen & Paraffin	positive / negative	negative			26.7285	13.9592	12.7693
Jill	10-06-08 Samples 18-21s-09-12	G1	3061119A4	Invasive Carcinoma	ACOT4-Hs00745041_s1	1	CHTN	74	T2N0M0	2A	T2N0M0	0		infiltrating ductal carcinoma with mucinous differentiation	8523/3: Infiltrating duct mixed with other types of ca.	2	1	Well-differentiated						25.9143	8.0076	17.9067	17.8329
Jill	10-06-08 Samples 18-21s-09-12	G2	3061119A4	Invasive Carcinoma	ACOT4-Hs00745041_s1	2	CHTN	74	T2N0M0	2A	T2N0M0	0		infiltrating ductal carcinoma with mucinous differentiation	8523/3: Infiltrating duct mixed with other types of ca.	2	1	Well-differentiated						25.7814	8.0076	17.7738
Jill	10-06-08 Samples 18-21s-09-12	G3	3061119A4	Invasive Carcinoma	ACOT4-Hs00745041_s1	3	CHTN	74	T2N0M0	2A	T2N0M0	0		infiltrating ductal carcinoma with mucinous differentiation	8523/3: Infiltrating duct mixed with other types of ca.	2	1	Well-differentiated						25.8258	8.0076	17.8182
2 RebeccaRepeat	Br 2 LDA 11-18-09 Plate 1	K4	3062104A7	Invasive Carcinoma	ACOT4-Hs00745041_s1	1	CHTN	52	T2, N0, M0	2A	T2, N0, M0	0	F	Invasive ductal carcinoma	8500/3: Infiltrating duct carcinoma, NOS	2	3	Poorly Differentiated						26.1008	5.27169	20.8291	20.22
2 RebeccaRepeat	Br 2 LDA 11-18-09 Plate 1	K5	3062104A7	Invasive Carcinoma	ACOT4-Hs00745041_s1	2	CHTN	52	T2, N0, M0	2A	T2, N0, M0	0	F	Invasive ductal carcinoma	8500/3: Infiltrating duct carcinoma, NOS	2	3	Poorly Differentiated						25.4544	5.27169	20.1827
2 RebeccaRepeat	Br 2 LDA 11-18-09 Plate 1	K6	3062104A7	Invasive Carcinoma	ACOT4-Hs00745041_s1	3	CHTN	52	T2, N0, M0	2A	T2, N0, M0	0	F	Invasive ductal carcinoma	8500/3: Infiltrating duct carcinoma, NOS	2	3	Poorly Differentiated						24.9199	5.27169	19.6483
Jill	10-06-08 Samples 13-16-s-08-09	K1	3070617A7	Invasive Carcinoma	ACOT4-Hs00745041_s1	1	CHTN	83	T3N0M0	2B	T3N0M0	0		infiltrating ductal carcinoma	8500/3: Infiltrating duct carcinoma, NOS	2	2	Moderately differentiated		positive/positive				26.6431	10.0795	16.5636	16.4853
Jill	10-06-08 Samples 13-16-s-08-09	K2	3070617A7	Invasive Carcinoma	ACOT4-Hs00745041_s1	2	CHTN	83	T3N0M0	2B	T3N0M0	0		infiltrating ductal carcinoma	8500/3: Infiltrating duct carcinoma, NOS	2	2	Moderately differentiated		positive/positive				26.49	10.0795	16.4104
Jill	10-06-08 Samples 13-16-s-08-09	K3	3070617A7	Invasive Carcinoma	ACOT4-Hs00745041_s1	3	CHTN	83	T3N0M0	2B	T3N0M0	0		infiltrating ductal carcinoma	8500/3: Infiltrating duct carcinoma, NOS	2	2	Moderately differentiated		positive/positive				26.5615	10.0795	16.4819
Jill	10-06-08 Samples 22-25Maricicass12-16	G1	4060634A10	Invasive Carcinoma	ACOT4-Hs00745041_s1	1	CHTN	79	T2N0M0	2A	T2N0M0	0		infiltrating ductal carcinoma with foci of cartilagginous metaplasia (metaplastic carcinoma)	8523/3: Infiltrating duct mixed with other types of ca.	2	3	Poorly differentiated						29.0518	8.78822	20.2636	20.3968
Jill	10-06-08 Samples 22-25Maricicass12-16	G2	4060634A10	Invasive Carcinoma	ACOT4-Hs00745041_s1	2	CHTN	79	T2N0M0	2A	T2N0M0	0		infiltrating ductal carcinoma with foci of cartilagginous metaplasia (metaplastic carcinoma)	8523/3: Infiltrating duct mixed with other types of ca.	2	3	Poorly differentiated						29.3439	8.78822	20.5557
Jill	10-06-08 Samples 22-25Maricicass12-16	G3	4060634A10	Invasive Carcinoma	ACOT4-Hs00745041_s1	3	CHTN	79	T2N0M0	2A	T2N0M0	0		infiltrating ductal carcinoma with foci of cartilagginous metaplasia (metaplastic carcinoma)	8523/3: Infiltrating duct mixed with other types of ca.	2	3	Poorly differentiated						29.1594	8.78822	20.3712
Jill	10-02-08 Samples 9-12	K1	4061094B24	Invasive Carcinoma	ACOT4-Hs00745041_s1	1	CHTN	84	T3N1M0	3C	T3N1M0	1		infiltrating ductal carcinoma	8500/3: Infiltrating duct carcinoma, NOS	3	3	Poorly differentiated						27.4	11.0615	16.3385	15.562
Jill	10-02-08 Samples 9-12	K2	4061094B24	Invasive Carcinoma	ACOT4-Hs00745041_s1	2	CHTN	84	T3N1M0	3C	T3N1M0	1		infiltrating ductal carcinoma	8500/3: Infiltrating duct carcinoma, NOS	3	3	Poorly differentiated						26.6059	11.0615	15.5444
Jill	10-02-08 Samples 9-12	K3	4061094B24	Invasive Carcinoma	ACOT4-Hs00745041_s1	3	CHTN	84	T3N1M0	3C	T3N1M0	1		infiltrating ductal carcinoma	8500/3: Infiltrating duct carcinoma, NOS	3	3	Poorly differentiated						25.8646	11.0615	14.8031
Jill	10-02-08 Samples 9-12	O1	4061196A1	Invasive Carcinoma	ACOT4-Hs00745041_s1	1	CHTN	75	T2N0M0	2A	T2N0M0	0		infiltrating lobular carcinoma with pleomorphic features and infiltrating ductal carcinoma (small component)	8524/3: Infiltrating lobular mixed with other types of ca.	2	2	Moderately differentiated						27.5605	7.20059	20.3599	20.2043
Jill	10-02-08 Samples 9-12	O2	4061196A1	Invasive Carcinoma	ACOT4-Hs00745041_s1	2	CHTN	75	T2N0M0	2A	T2N0M0	0		infiltrating lobular carcinoma with pleomorphic features and infiltrating ductal carcinoma (small component)	8524/3: Infiltrating lobular mixed with other types of ca.	2	2	Moderately differentiated						27.4251	7.20059	20.2245
Jill	10-02-08 Samples 9-12	O3	4061196A1	Invasive Carcinoma	ACOT4-Hs00745041_s1	3	CHTN	75	T2N0M0	2A	T2N0M0	0		infiltrating lobular carcinoma with pleomorphic features and infiltrating ductal carcinoma (small component)	8524/3: Infiltrating lobular mixed with other types of ca.	2	2	Moderately differentiated						27.2291	7.20059	20.0285
Jill	10-06-08 Samples 13-16-s-08-09	O1	4070249A3	Invasive Carcinoma	ACOT4-Hs00745041_s1	1	CHTN	61	T2N0M0	2A	T2N0M0	0		invasive lobular carcinoma, pleomorphic type with signet-ring cell features	8524/3: Infiltrating lobular mixed with other types of ca.	2	1	Well-differentiated						31.7096	11.885	19.8246	19.6237
Jill	10-06-08 Samples 13-16-s-08-09	O2	4070249A3	Invasive Carcinoma	ACOT4-Hs00745041_s1	2	CHTN	61	T2N0M0	2A	T2N0M0	0		invasive lobular carcinoma, pleomorphic type with signet-ring cell features	8524/3: Infiltrating lobular mixed with other types of ca.	2	1	Well-differentiated						31.3585	11.885	19.4735
Jill	10-06-08 Samples 13-16-s-08-09	O3	4070249A3	Invasive Carcinoma	ACOT4-Hs00745041_s1	3	CHTN	61	T2N0M0	2A	T2N0M0	0		invasive lobular carcinoma, pleomorphic type with signet-ring cell features	8524/3: Infiltrating lobular mixed with other types of ca.	2	1	Well-differentiated						31.4579	11.885	19.5729
RebeccaRepeat	Br 2 LDA 9-28-09 Plate 1	K4	4080633A6	Invasive Carcinoma	ACOT4-Hs00745041_s1	1	CHTN	65	T3, N1, M0	3A	T3, N1, M0	1	F	Invasive Ductal Carcinoma	8500/3: Infiltrating duct carcinoma, NOS	3	3	Poorly Differentiated	Frozen& Paraffin					30.2801	10.7268	19.5534	19.7196
RebeccaRepeat	Br 2 LDA 9-28-09 Plate 1	K6	4080633A6	Invasive Carcinoma	ACOT4-Hs00745041_s1	2	CHTN	65	T3, N1, M0	3A	T3, N1, M0	1	F	Invasive Ductal Carcinoma	8500/3: Infiltrating duct carcinoma, NOS	3	3	Poorly Differentiated	Frozen& Paraffin					30.3288	10.7268	19.6021
RebeccaRepeat	Br 2 LDA 9-28-09 Plate 1	K5	4080633A6	Invasive Carcinoma	ACOT4-Hs00745041_s1	3	CHTN	65	T3, N1, M0	3A	T3, N1, M0	1	F	Invasive Ductal Carcinoma	8500/3: Infiltrating duct carcinoma, NOS	3	3	Poorly Differentiated	Frozen& Paraffin					30.73	10.7268	20.0032
RebeccaLast	Br 2 LDA 1-7-10 Plate 1	K4	T03-104	Invasive Carcinoma	ACOT4-Hs00745041_s1	1	WVUTB	Missing	T3N1M0	3A	T3N1M0	1	F	Infiltrating Ductal Carcinoma	8500/3: Infiltrating duct carcinoma, NOS	3	3	Poorly differentiated	Frozen	negative/negative	negative			27.6105	14.5378	13.0727	12.7459
RebeccaLast	Br 2 LDA 1-7-10 Plate 1	K5	T03-104	Invasive Carcinoma	ACOT4-Hs00745041_s1	2	WVUTB	Missing	T3N1M0	3A	T3N1M0	1	F	Infiltrating Ductal Carcinoma	8500/3: Infiltrating duct carcinoma, NOS	3	3	Poorly differentiated	Frozen	negative/negative	negative			26.9453	14.5378	12.4076
RebeccaLast	Br 2 LDA 1-7-10 Plate 1	K6	T03-104	Invasive Carcinoma	ACOT4-Hs00745041_s1	3	WVUTB	Missing	T3N1M0	3A	T3N1M0	1	F	Infiltrating Ductal Carcinoma	8500/3: Infiltrating duct carcinoma, NOS	3	3	Poorly differentiated	Frozen	negative/negative	negative			27.2951	14.5378	12.7573
Jill	10-09-08 Samples 50-53s40-44	C1	T033474	Invasive Carcinoma	ACOT4-Hs00745041_s1	1	WVUTB	50	I;T1,NO,MO		T1,NO,MO	0		infiltrating ductal carcinoma	8500/3: Infiltrating duct carcinoma, NOS	1	2	Moderately Differentiated						30.3997	8.56206	21.8377	22.2005
Jill	10-09-08 Samples 50-53s40-44	C2	T033474	Invasive Carcinoma	ACOT4-Hs00745041_s1	2	WVUTB	50	I;T1,NO,MO		T1,NO,MO	0		infiltrating ductal carcinoma	8500/3: Infiltrating duct carcinoma, NOS	1	2	Moderately Differentiated						30.7417	8.56206	22.1796
Jill	10-09-08 Samples 50-53s40-44	C3	T033474	Invasive Carcinoma	ACOT4-Hs00745041_s1	3	WVUTB	50	I;T1,NO,MO		T1,NO,MO	0		infiltrating ductal carcinoma	8500/3: Infiltrating duct carcinoma, NOS	1	2	Moderately Differentiated						31.1462	8.56206	22.5842
Jill	10-09-08 Samples 50-53s40-44	K1	T041014	Invasive Carcinoma	ACOT4-Hs00745041_s1	1	WVUTB	66	IIA,T2, N0, M0		T2, N0, M0	0		invasive ductal carcinoma	8500/3: Infiltrating duct carcinoma, NOS	2	3	Poorly differentiated						27.1902	5.78564	21.4046	21.4302
Jill	10-09-08 Samples 50-53s40-44	K2	T041014	Invasive Carcinoma	ACOT4-Hs00745041_s1	2	WVUTB	66	IIA,T2, N0, M0		T2, N0, M0	0		invasive ductal carcinoma	8500/3: Infiltrating duct carcinoma, NOS	2	3	Poorly differentiated						27.2543	5.78564	21.4687
Jill	10-09-08 Samples 50-53s40-44	K3	T041014	Invasive Carcinoma	ACOT4-Hs00745041_s1	3	WVUTB	66	IIA,T2, N0, M0		T2, N0, M0	0		invasive ductal carcinoma	8500/3: Infiltrating duct carcinoma, NOS	2	3	Poorly differentiated						27.2031	5.78564	21.4174
2 RebeccaRepeat	Br 2 LDA 11-16-09 Plate 1	O4	T04-167-005	Invasive Carcinoma	ACOT4-Hs00745041_s1	1	WVUTB	43	T2, N0, M0	2A	T2, N0, M0	0	F	Infiltrating metastatic ductal carcinoma	8500/3: Infiltrating duct carcinoma, NOS	2	3	Poorly differentiated	Frozen	positive/positive	intermediate	Pre menopausal		24.847	10.7992	14.0477	14.3751
2 RebeccaRepeat	Br 2 LDA 11-16-09 Plate 1	O5	T04-167-005	Invasive Carcinoma	ACOT4-Hs00745041_s1	2	WVUTB	43	T2, N0, M0	2A	T2, N0, M0	0	F	Infiltrating metastatic ductal carcinoma	8500/3: Infiltrating duct carcinoma, NOS	2	3	Poorly differentiated	Frozen	positive/positive	intermediate	Pre menopausal		25.0908	10.7992	14.2915
2 RebeccaRepeat	Br 2 LDA 11-16-09 Plate 1	O6	T04-167-005	Invasive Carcinoma	ACOT4-Hs00745041_s1	3	WVUTB	43	T2, N0, M0	2A	T2, N0, M0	0	F	Infiltrating metastatic ductal carcinoma	8500/3: Infiltrating duct carcinoma, NOS	2	3	Poorly differentiated	Frozen	positive/positive	intermediate	Pre menopausal		25.5852	10.7992	14.786
Jill	10-09-08 Samples 46-49s37-40	K1	T053774	Invasive Carcinoma	ACOT4-Hs00745041_s1	1	WVUTB	59	IIA;T2,N0,M0		T2,N0,M0	0		infiltrating ductal carcinoma	8500/3: Infiltrating duct carcinoma, NOS	2	3	Poorly differentiated						25.9461	5.64001	20.3061	20.3558
Jill	10-09-08 Samples 46-49s37-40	K2	T053774	Invasive Carcinoma	ACOT4-Hs00745041_s1	2	WVUTB	59	IIA;T2,N0,M0		T2,N0,M0	0		infiltrating ductal carcinoma	8500/3: Infiltrating duct carcinoma, NOS	2	3	Poorly differentiated						26.0561	5.64001	20.4161
Jill	10-09-08 Samples 46-49s37-40	K3	T053774	Invasive Carcinoma	ACOT4-Hs00745041_s1	3	WVUTB	59	IIA;T2,N0,M0		T2,N0,M0	0		infiltrating ductal carcinoma	8500/3: Infiltrating duct carcinoma, NOS	2	3	Poorly differentiated						25.9851	5.64001	20.3451
Jill	10-07-08 Samples 34-37-Maricicas-27-28	C1	T053889	Invasive Carcinoma	ACOT4-Hs00745041_s1	1	WVUTB	80	IIA, pT2, pN0, pM0		pT2, pN0, pM0	0		infiltrating ductal adenocarcinoma	8500/3: Infiltrating duct carcinoma, NOS	2	3	Poorly differentiated						26.3206	7.30877	19.0118	19.0728
Jill	10-07-08 Samples 34-37-Maricicas-27-28	C2	T053889	Invasive Carcinoma	ACOT4-Hs00745041_s1	2	WVUTB	80	IIA, pT2, pN0, pM0		pT2, pN0, pM0	0		infiltrating ductal adenocarcinoma	8500/3: Infiltrating duct carcinoma, NOS	2	3	Poorly differentiated						26.37	7.30877	19.0613
Jill	10-07-08 Samples 34-37-Maricicas-27-28	C3	T053889	Invasive Carcinoma	ACOT4-Hs00745041_s1	3	WVUTB	80	IIA, pT2, pN0, pM0		pT2, pN0, pM0	0		infiltrating ductal adenocarcinoma	8500/3: Infiltrating duct carcinoma, NOS	2	3	Poorly differentiated						26.454	7.30877	19.1452
Jill	10-08-08 Samples 38-41s31-32	O1	T0607908	Invasive Carcinoma	ACOT4-Hs00745041_s1	1	WVUTB	46	IIA, pT2N0M0		pT2N0M0	0		papillary carcinoma	8050/3: Papillary carcinoma, NOS	2	2	Moderately differentiated						26.7511	6.56973	20.1814	20.4196
Jill	10-08-08 Samples 38-41s31-32	O2	T0607908	Invasive Carcinoma	ACOT4-Hs00745041_s1	2	WVUTB	46	IIA, pT2N0M0		pT2N0M0	0		papillary carcinoma	8050/3: Papillary carcinoma, NOS	2	2	Moderately differentiated						26.9156	6.56973	20.3459
Jill	10-08-08 Samples 38-41s31-32	O3	T0607908	Invasive Carcinoma	ACOT4-Hs00745041_s1	3	WVUTB	46	IIA, pT2N0M0		pT2N0M0	0		papillary carcinoma	8050/3: Papillary carcinoma, NOS	2	2	Moderately differentiated						27.3012	6.56973	20.7314
Jill	10-08-08 Samples 42-45s32-36	K1	T061324	Invasive Carcinoma	ACOT4-Hs00745041_s1	1	WVUTB	55	II, pT2, pN0, pM0		pT2, pN0, pM0	0		invasive ductal adenocarcinoma, mucinous	8500/3: Infiltrating duct carcinoma, NOS	2	3	Poorly Differentiated						23.614	6.26543	17.3486	17.4193
Jill	10-08-08 Samples 42-45s32-36	K2	T061324	Invasive Carcinoma	ACOT4-Hs00745041_s1	2	WVUTB	55	II, pT2, pN0, pM0		pT2, pN0, pM0	0		invasive ductal adenocarcinoma, mucinous	8500/3: Infiltrating duct carcinoma, NOS	2	3	Poorly Differentiated						23.6277	6.26543	17.3622
Jill	10-08-08 Samples 42-45s32-36	K3	T061324	Invasive Carcinoma	ACOT4-Hs00745041_s1	3	WVUTB	55	II, pT2, pN0, pM0		pT2, pN0, pM0	0		invasive ductal adenocarcinoma, mucinous	8500/3: Infiltrating duct carcinoma, NOS	2	3	Poorly Differentiated						23.8125	6.26543	17.5471
Jill	10-07-08 Samples 34-37-Maricicas-27-28	K1	T0621513	Invasive Carcinoma	ACOT4-Hs00745041_s1	1	WVUTB	86	IIIB, T4, N1, M0		T4, N1, M0	1		mammary carcinoma, predominately mucinous adenocarcinoma with areas of infiltrating ductal carcinoma	8480/3: Mucinous adenocarcinoma	3	3	Poorly differentiated						25.8771	7.7534	18.1237	18.2447
Jill	10-07-08 Samples 34-37-Maricicas-27-28	K2	T0621513	Invasive Carcinoma	ACOT4-Hs00745041_s1	2	WVUTB	86	IIIB, T4, N1, M0		T4, N1, M0	1		mammary carcinoma, predominately mucinous adenocarcinoma with areas of infiltrating ductal carcinoma	8480/3: Mucinous adenocarcinoma	3	3	Poorly differentiated						26.004	7.7534	18.2506
Jill	10-07-08 Samples 34-37-Maricicas-27-28	K3	T0621513	Invasive Carcinoma	ACOT4-Hs00745041_s1	3	WVUTB	86	IIIB, T4, N1, M0		T4, N1, M0	1		mammary carcinoma, predominately mucinous adenocarcinoma with areas of infiltrating ductal carcinoma	8480/3: Mucinous adenocarcinoma	3	3	Poorly differentiated						26.1131	7.7534	18.3597
Jill	10-07-08 Samples 34-37-Maricicas-27-28	O1	T0630919	Invasive Carcinoma	ACOT4-Hs00745041_s1	1	WVUTB	58	I, pT1,pN0, pM0		pT1,pN0, pM0	0		invasive ductal carcinoma, mucinous carcinoma	8500/3: Infiltrating duct carcinoma, NOS	1	1	Well-differentiated						27.6997	8.44754	19.2522	19.21
Jill	10-07-08 Samples 34-37-Maricicas-27-28	O2	T0630919	Invasive Carcinoma	ACOT4-Hs00745041_s1	2	WVUTB	58	I, pT1,pN0, pM0		pT1,pN0, pM0	0		invasive ductal carcinoma, mucinous carcinoma	8500/3: Infiltrating duct carcinoma, NOS	1	1	Well-differentiated						27.6905	8.44754	19.243
Jill	10-07-08 Samples 34-37-Maricicas-27-28	O3	T0630919	Invasive Carcinoma	ACOT4-Hs00745041_s1	3	WVUTB	58	I, pT1,pN0, pM0		pT1,pN0, pM0	0		invasive ductal carcinoma, mucinous carcinoma	8500/3: Infiltrating duct carcinoma, NOS	1	1	Well-differentiated						27.5823	8.44754	19.1347
RebeccaRepeat	Br 2 LDA 9-28-09 Plate 2	K6	T06-326-013	Invasive Carcinoma	ACOT4-Hs00745041_s1	1	WVUTB	44	pT2, pN2a, pMx	3A	pT2, pN2a, pMx	1	F	Invasive ductal carcinoma	8500/3: Infiltrating duct carcinoma, NOS	3	3	Poorly differentiated	Frozen	Positive / Positive	negative			27.6523	9.01661	18.6357	18.756
RebeccaRepeat	Br 2 LDA 9-28-09 Plate 2	K4	T06-326-013	Invasive Carcinoma	ACOT4-Hs00745041_s1	2	WVUTB	44	pT2, pN2a, pMx	3A	pT2, pN2a, pMx	1	F	Invasive ductal carcinoma	8500/3: Infiltrating duct carcinoma, NOS	3	3	Poorly differentiated	Frozen	Positive / Positive	negative			27.6604	9.01661	18.6437
RebeccaRepeat	Br 2 LDA 9-28-09 Plate 2	K5	T06-326-013	Invasive Carcinoma	ACOT4-Hs00745041_s1	3	WVUTB	44	pT2, pN2a, pMx	3A	pT2, pN2a, pMx	1	F	Invasive ductal carcinoma	8500/3: Infiltrating duct carcinoma, NOS	3	3	Poorly differentiated	Frozen	Positive / Positive	negative			28.0053	9.01661	18.9887
Jill	10-08-08 Samples 38-41s31-32	C1	T0633206	Invasive Carcinoma	ACOT4-Hs00745041_s1	1	WVUTB	50	IIA, pT2, pN0, pM0		pT2, pN0, pM0	0		invasive ductal carcinoma	8500/3: Infiltrating duct carcinoma, NOS	2	1	Well-differentiated						28.7382	8.27849	20.4597	20.7043
Jill	10-08-08 Samples 38-41s31-32	C2	T0633206	Invasive Carcinoma	ACOT4-Hs00745041_s1	2	WVUTB	50	IIA, pT2, pN0, pM0		pT2, pN0, pM0	0		invasive ductal carcinoma	8500/3: Infiltrating duct carcinoma, NOS	2	1	Well-differentiated						28.9941	8.27849	20.7156
Jill	10-08-08 Samples 38-41s31-32	C3	T0633206	Invasive Carcinoma	ACOT4-Hs00745041_s1	3	WVUTB	50	IIA, pT2, pN0, pM0		pT2, pN0, pM0	0		invasive ductal carcinoma	8500/3: Infiltrating duct carcinoma, NOS	2	1	Well-differentiated						29.2159	8.27849	20.9374
Jill	10-08-08 Samples 42-45s32-36	C1	T0633418	Invasive Carcinoma	ACOT4-Hs00745041_s1	1	WVUTB	50	IIIC, pT1, pN3a, pM0		pT1, pN3a, pM0	1		infiltrating ductal adenocarcinoma	8500/3: Infiltrating duct carcinoma, NOS	3	3	Poorly Differentiated						25.5956	4.40614	21.1895	21.7534
Jill	10-08-08 Samples 42-45s32-36	C2	T0633418	Invasive Carcinoma	ACOT4-Hs00745041_s1	2	WVUTB	50	IIIC, pT1, pN3a, pM0		pT1, pN3a, pM0	1		infiltrating ductal adenocarcinoma	8500/3: Infiltrating duct carcinoma, NOS	3	3	Poorly Differentiated						26.5563	4.40614	22.1501
Jill	10-08-08 Samples 42-45s32-36	C3	T0633418	Invasive Carcinoma	ACOT4-Hs00745041_s1	3	WVUTB	50	IIIC, pT1, pN3a, pM0		pT1, pN3a, pM0	1		infiltrating ductal adenocarcinoma	8500/3: Infiltrating duct carcinoma, NOS	3	3	Poorly Differentiated						26.3266	4.40614	21.9204
Jill	10-07-08 Samples 26-29s-17-20	C1	T066004	Invasive Carcinoma	ACOT4-Hs00745041_s1	1	WVUTB	46	IIA, T2, N1, M0		T2, N1, M0	1		infiltrating ductal carcinoma	8500/3: Infiltrating duct carcinoma, NOS	2	3	Poorly differentiated						30.7752	8.53468	22.2405	21.7264
Jill	10-07-08 Samples 26-29s-17-20	C2	T066004	Invasive Carcinoma	ACOT4-Hs00745041_s1	2	WVUTB	46	IIA, T2, N1, M0		T2, N1, M0	1		infiltrating ductal carcinoma	8500/3: Infiltrating duct carcinoma, NOS	2	3	Poorly differentiated						29.6674	8.53468	21.1327
Jill	10-07-08 Samples 26-29s-17-20	C3	T066004	Invasive Carcinoma	ACOT4-Hs00745041_s1	3	WVUTB	46	IIA, T2, N1, M0		T2, N1, M0	1		infiltrating ductal carcinoma	8500/3: Infiltrating duct carcinoma, NOS	2	3	Poorly differentiated						30.3405	8.53468	21.8058
Jill	10-07-08 Samples 30-33s-21-24	K1	T069213	Invasive Carcinoma	ACOT4-Hs00745041_s1	1	WVUTB	80	1, T1, N0, M0		T1, N0, M0	0		invasive pleomorphic lobular carcinoma	8524/3: Infiltrating lobular mixed with other types of ca.	1	3	Poorly differentiated						27.1276	7.49955	19.6281	19.4824
Jill	10-07-08 Samples 30-33s-21-24	K2	T069213	Invasive Carcinoma	ACOT4-Hs00745041_s1	2	WVUTB	80	1, T1, N0, M0		T1, N0, M0	0		invasive pleomorphic lobular carcinoma	8524/3: Infiltrating lobular mixed with other types of ca.	1	3	Poorly differentiated						26.9716	7.49955	19.472
Jill	10-07-08 Samples 30-33s-21-24	K3	T069213	Invasive Carcinoma	ACOT4-Hs00745041_s1	3	WVUTB	80	1, T1, N0, M0		T1, N0, M0	0		invasive pleomorphic lobular carcinoma	8524/3: Infiltrating lobular mixed with other types of ca.	1	3	Poorly differentiated						26.8466	7.49955	19.347
2 RebeccaRepeat	Br 2 LDA 11-10-09 Plate 1	C6	T07-086-004	Invasive Carcinoma	ACOT4-Hs00745041_s1	1	WVUTB	45	pT1c, pN0(i-), pM0	1	pT1c, pN0(i-), pM0	0	F	Invasive ductal carcinoma	8500/3: Infiltrating duct carcinoma, NOS	1	3	Poorly differentiated	Frozen	positive / positive	negative			36.2787	28.6578	7.62082	7.62082
2 RebeccaRepeat	Br 2 LDA 11-10-09 Plate 1	C4	T07-086-004	Invasive Carcinoma	ACOT4-Hs00745041_s1	2	WVUTB	45	pT1c, pN0(i-), pM0	1	pT1c, pN0(i-), pM0	0	F	Invasive ductal carcinoma	8500/3: Infiltrating duct carcinoma, NOS	1	3	Poorly differentiated	Frozen	positive / positive	negative				28.6578
2 RebeccaRepeat	Br 2 LDA 11-10-09 Plate 1	C5	T07-086-004	Invasive Carcinoma	ACOT4-Hs00745041_s1	3	WVUTB	45	pT1c, pN0(i-), pM0	1	pT1c, pN0(i-), pM0	0	F	Invasive ductal carcinoma	8500/3: Infiltrating duct carcinoma, NOS	1	3	Poorly differentiated	Frozen	positive / positive	negative				28.6578
Jill	10-09-08 Samples 46-49s37-40	C1	T0714312	Invasive Carcinoma	ACOT4-Hs00745041_s1	1	WVUTB	42	IIA;T2,N0,M0		T2,N0,M0	0		recurrent/residual infiltrating ductal adenocarcinoma with an extensive intraductal component	8500/3: Infiltrating duct carcinoma, NOS	2	3	Poorly differentiated						28.577	6.7503	21.8268	22.4288
Jill	10-09-08 Samples 46-49s37-40	C2	T0714312	Invasive Carcinoma	ACOT4-Hs00745041_s1	2	WVUTB	42	IIA;T2,N0,M0		T2,N0,M0	0		recurrent/residual infiltrating ductal adenocarcinoma with an extensive intraductal component	8500/3: Infiltrating duct carcinoma, NOS	2	3	Poorly differentiated						29.7965	6.7503	23.0462
Jill	10-09-08 Samples 46-49s37-40	C3	T0714312	Invasive Carcinoma	ACOT4-Hs00745041_s1	3	WVUTB	42	IIA;T2,N0,M0		T2,N0,M0	0		recurrent/residual infiltrating ductal adenocarcinoma with an extensive intraductal component	8500/3: Infiltrating duct carcinoma, NOS	2	3	Poorly differentiated						29.1637	6.7503	22.4134
Jill	10-09-08 Samples 46-49s37-40	O1	T071626	Invasive Carcinoma	ACOT4-Hs00745041_s1	1	WVUTB	69	IV, pT3, pN1a, pM0		pT3, pN1a, pM0	1		invasive ductal carcinoma	8500/3: Infiltrating duct carcinoma, NOS	3	3	Poorly differentiated						26.8545	6.71873	20.1357	20.1581
Jill	10-09-08 Samples 46-49s37-40	O2	T071626	Invasive Carcinoma	ACOT4-Hs00745041_s1	2	WVUTB	69	IV, pT3, pN1a, pM0		pT3, pN1a, pM0	1		invasive ductal carcinoma	8500/3: Infiltrating duct carcinoma, NOS	3	3	Poorly differentiated						26.6386	6.71873	19.9199
Jill	10-09-08 Samples 46-49s37-40	O3	T071626	Invasive Carcinoma	ACOT4-Hs00745041_s1	3	WVUTB	69	IV, pT3, pN1a, pM0		pT3, pN1a, pM0	1		invasive ductal carcinoma	8500/3: Infiltrating duct carcinoma, NOS	3	3	Poorly differentiated						27.1373	6.71873	20.4186
Jill	10-09-08 Samples 50-53s40-44	O1	T0717210	Invasive Carcinoma	ACOT4-Hs00745041_s1	1	WVUTB	50	IIIB,pT2, pN2a, pM0		pT2, pN2a, pM0	1		invasive ductal carcinoma	8500/3: Infiltrating duct carcinoma, NOS	3	2	Moderately differentiated						30.1288	7.90212	22.2267	22.2102
Jill	10-09-08 Samples 50-53s40-44	O2	T0717210	Invasive Carcinoma	ACOT4-Hs00745041_s1	2	WVUTB	50	IIIB,pT2, pN2a, pM0		pT2, pN2a, pM0	1		invasive ductal carcinoma	8500/3: Infiltrating duct carcinoma, NOS	3	2	Moderately differentiated						30.0679	7.90212	22.1657
Jill	10-09-08 Samples 50-53s40-44	O3	T0717210	Invasive Carcinoma	ACOT4-Hs00745041_s1	3	WVUTB	50	IIIB,pT2, pN2a, pM0		pT2, pN2a, pM0	1		invasive ductal carcinoma	8500/3: Infiltrating duct carcinoma, NOS	3	2	Moderately differentiated						30.1402	7.90212	22.2381
Jill	10-07-08 Samples 26-29s-17-20	K1	T071976	Invasive Carcinoma	ACOT4-Hs00745041_s1	1	WVUTB	43	IIIA;T3,N1,M0		T3,N1,M0	1		resdiual, invasive infiltrating ductal carcinoma	8500/3: Infiltrating duct carcinoma, NOS	3	3	Poorly differentiated						26.7709	5.98754	20.7833	20.3943
Jill	10-07-08 Samples 26-29s-17-20	K2	T071976	Invasive Carcinoma	ACOT4-Hs00745041_s1	2	WVUTB	43	IIIA;T3,N1,M0		T3,N1,M0	1		resdiual, invasive infiltrating ductal carcinoma	8500/3: Infiltrating duct carcinoma, NOS	3	3	Poorly differentiated						26.5737	5.98754	20.5861
Jill	10-07-08 Samples 26-29s-17-20	K3	T071976	Invasive Carcinoma	ACOT4-Hs00745041_s1	3	WVUTB	43	IIIA;T3,N1,M0		T3,N1,M0	1		resdiual, invasive infiltrating ductal carcinoma	8500/3: Infiltrating duct carcinoma, NOS	3	3	Poorly differentiated						25.8011	5.98754	19.8136
Jill	10-08-08 Samples 42-45s32-36	O1	T07593	Invasive Carcinoma	ACOT4-Hs00745041_s1	1	WVUTB	67	IIB,pT2, pN1b, pM0		pT2, pN1b, pM0	1		invasive ductal carcinoma	8500/3: Infiltrating duct carcinoma, NOS	2	2	Moderately differentiated						24.8089	6.63636	18.1725	18.4277
Jill	10-08-08 Samples 42-45s32-36	O2	T07593	Invasive Carcinoma	ACOT4-Hs00745041_s1	2	WVUTB	67	IIB,pT2, pN1b, pM0		pT2, pN1b, pM0	1		invasive ductal carcinoma	8500/3: Infiltrating duct carcinoma, NOS	2	2	Moderately differentiated						25.2029	6.63636	18.5666
Jill	10-08-08 Samples 42-45s32-36	O3	T07593	Invasive Carcinoma	ACOT4-Hs00745041_s1	3	WVUTB	67	IIB,pT2, pN1b, pM0		pT2, pN1b, pM0	1		invasive ductal carcinoma	8500/3: Infiltrating duct carcinoma, NOS	2	2	Moderately differentiated						25.1804	6.63636	18.5441
Jill	10-07-08 Samples 30-33s-21-24	G1	T07818	Invasive Carcinoma	ACOT4-Hs00745041_s1	1	WVUTB	43	IIB, T2 N1 M0		T2 N1 M0	1		invasive ductal carcinoma	8500/3: Infiltrating duct carcinoma, NOS	2	3	Poorly differentiated						29.0275	9.34579	19.6817	19.2397
Jill	10-07-08 Samples 30-33s-21-24	G2	T07818	Invasive Carcinoma	ACOT4-Hs00745041_s1	2	WVUTB	43	IIB, T2 N1 M0		T2 N1 M0	1		invasive ductal carcinoma	8500/3: Infiltrating duct carcinoma, NOS	2	3	Poorly differentiated						28.4788	9.34579	19.133
Jill	10-07-08 Samples 30-33s-21-24	G3	T07818	Invasive Carcinoma	ACOT4-Hs00745041_s1	3	WVUTB	43	IIB, T2 N1 M0		T2 N1 M0	1		invasive ductal carcinoma	8500/3: Infiltrating duct carcinoma, NOS	2	3	Poorly differentiated						28.2503	9.34579	18.9045
RebeccaRepeat	Br 2 LDA 9-25-09 Plate 1	K4	T09-013-004	Invasive Carcinoma	ACOT4-Hs00745041_s1	1	WVUTB	68	T1, N0, M0	1	T1, N0, M0	0	F	Invasive ductal carcinoma	8500/3: Infiltrating duct carcinoma, NOS	1	2	Moderately differentiated	Frozen	positive/positive	negative	Post menopausal		28.3858	9.49052	18.8953	18.9325
RebeccaRepeat	Br 2 LDA 9-25-09 Plate 1	K5	T09-013-004	Invasive Carcinoma	ACOT4-Hs00745041_s1	2	WVUTB	68	T1, N0, M0	1	T1, N0, M0	0	F	Invasive ductal carcinoma	8500/3: Infiltrating duct carcinoma, NOS	1	2	Moderately differentiated	Frozen	positive/positive	negative	Post menopausal		28.3977	9.49052	18.9072
RebeccaRepeat	Br 2 LDA 9-25-09 Plate 1	K6	T09-013-004	Invasive Carcinoma	ACOT4-Hs00745041_s1	3	WVUTB	68	T1, N0, M0	1	T1, N0, M0	0	F	Invasive ductal carcinoma	8500/3: Infiltrating duct carcinoma, NOS	1	2	Moderately differentiated	Frozen	positive/positive	negative	Post menopausal		28.4856	9.49052	18.9951
RebeccaRepeat	Br 2 LDA 9-28-09 Plate 2	G6	T09-023-003	Invasive Carcinoma	ACOT4-Hs00745041_s1	1	WVUTB	56	pT1c, pN0(i-), pM0	1	pT1c, pN0(i-), pM0	0	F	Invasive ductal adenocarcinoma	8500/3: Infiltrating duct carcinoma, NOS	1	2	Moderately differentiated	Frozen	positive/positive	positive	Post menopausal		30.4577	11.0381	19.4196	19.4649
RebeccaRepeat	Br 2 LDA 9-28-09 Plate 2	G4	T09-023-003	Invasive Carcinoma	ACOT4-Hs00745041_s1	2	WVUTB	56	pT1c, pN0(i-), pM0	1	pT1c, pN0(i-), pM0	0	F	Invasive ductal adenocarcinoma	8500/3: Infiltrating duct carcinoma, NOS	1	2	Moderately differentiated	Frozen	positive/positive	positive	Post menopausal		30.4967	11.0381	19.4586
RebeccaRepeat	Br 2 LDA 9-28-09 Plate 2	G5	T09-023-003	Invasive Carcinoma	ACOT4-Hs00745041_s1	3	WVUTB	56	pT1c, pN0(i-), pM0	1	pT1c, pN0(i-), pM0	0	F	Invasive ductal adenocarcinoma	8500/3: Infiltrating duct carcinoma, NOS	1	2	Moderately differentiated	Frozen	positive/positive	positive	Post menopausal		30.5545	11.0381	19.5164
RebeccaRepeat	Br 2 LDA 9-28-09 Plate 2	O4	T09-034-002	Invasive Carcinoma	ACOT4-Hs00745041_s1	1	WVUTB	51	pT1c, pN0, pM0	1	pT1c, pN0, pM0	0	F	Invasive lobular carcinoma	8524/3: Infiltrating lobular mixed with other types of ca.	1	2	Moderately differentiated	Frozen	positive/positive	negative	perimenopausal		29.3384	10.7996	18.5388	18.5963
RebeccaRepeat	Br 2 LDA 9-28-09 Plate 2	O5	T09-034-002	Invasive Carcinoma	ACOT4-Hs00745041_s1	2	WVUTB	51	pT1c, pN0, pM0	1	pT1c, pN0, pM0	0	F	Invasive lobular carcinoma	8524/3: Infiltrating lobular mixed with other types of ca.	1	2	Moderately differentiated	Frozen	positive/positive	negative	perimenopausal		29.3927	10.7996	18.5931
RebeccaRepeat	Br 2 LDA 9-28-09 Plate 2	O6	T09-034-002	Invasive Carcinoma	ACOT4-Hs00745041_s1	3	WVUTB	51	pT1c, pN0, pM0	1	pT1c, pN0, pM0	0	F	Invasive lobular carcinoma	8524/3: Infiltrating lobular mixed with other types of ca.	1	2	Moderately differentiated	Frozen	positive/positive	negative	perimenopausal		29.4564	10.7996	18.6569
2 RebeccaRepeat	Br 2 LDA 11-16-09 Plate 1	K5	T09-035-001	Invasive Carcinoma	ACOT4-Hs00745041_s1	1	WVUTB	78	pT2, pN0(i-), pM0	2A	pT2, pN0(i-), pM0	0	F	Invasive lobular carcinoma	8524/3: Infiltrating lobular mixed with other types of ca.	2	2	Moderately differentiated	Frozen	positive/negative	negative	Post menopausal		33.8817	29.0066	4.87511	6.3485
2 RebeccaRepeat	Br 2 LDA 11-16-09 Plate 1	K6	T09-035-001	Invasive Carcinoma	ACOT4-Hs00745041_s1	2	WVUTB	78	pT2, pN0(i-), pM0	2A	pT2, pN0(i-), pM0	0	F	Invasive lobular carcinoma	8524/3: Infiltrating lobular mixed with other types of ca.	2	2	Moderately differentiated	Frozen	positive/negative	negative	Post menopausal		36.8285	29.0066	7.82189
2 RebeccaRepeat	Br 2 LDA 11-16-09 Plate 1	K4	T09-035-001	Invasive Carcinoma	ACOT4-Hs00745041_s1	3	WVUTB	78	pT2, pN0(i-), pM0	2A	pT2, pN0(i-), pM0	0	F	Invasive lobular carcinoma	8524/3: Infiltrating lobular mixed with other types of ca.	2	2	Moderately differentiated	Frozen	positive/negative	negative	Post menopausal			29.0066
2 RebeccaRepeat	Br 2 LDA 11-18-09 Plate 2	C6	T09-047-003	Invasive Carcinoma	ACOT4-Hs00745041_s1	1	WVUTB	51	pT1c pN0(i-),pM0	1A	pT1c pN0(i-),pM0	0	F	Mucinous carcinoma	8480/3: Mucinous adenocarcinoma	1	2	Moderately differentiated	Frozen	positive/positive	negative			27.4553	9.77874	17.6765	17.697
2 RebeccaRepeat	Br 2 LDA 11-18-09 Plate 2	C4	T09-047-003	Invasive Carcinoma	ACOT4-Hs00745041_s1	2	WVUTB	51	pT1c pN0(i-),pM0	1A	pT1c pN0(i-),pM0	0	F	Mucinous carcinoma	8480/3: Mucinous adenocarcinoma	1	2	Moderately differentiated	Frozen	positive/positive	negative			27.4673	9.77874	17.6886
2 RebeccaRepeat	Br 2 LDA 11-18-09 Plate 2	C5	T09-047-003	Invasive Carcinoma	ACOT4-Hs00745041_s1	3	WVUTB	51	pT1c pN0(i-),pM0	1A	pT1c pN0(i-),pM0	0	F	Mucinous carcinoma	8480/3: Mucinous adenocarcinoma	1	2	Moderately differentiated	Frozen	positive/positive	negative			27.5045	9.77874	17.7257
2 RebeccaRepeat	Br 2 LDA 11-18-09 Plate 2	K5	T09-064-001	Invasive Carcinoma	ACOT4-Hs00745041_s1	1	WVUTB	44	pT1c, N1a, M0	2A	pT1c, N1a, M0	1	F	Invasive ductal carcinoma	8500/3: Infiltrating duct carcinoma, NOS	2	2	Moderately differentiated	Frozen	positive/positive	negative	Pre menopausal		26.6597	10.4652	16.1945	16.2762
2 RebeccaRepeat	Br 2 LDA 11-18-09 Plate 2	K6	T09-064-001	Invasive Carcinoma	ACOT4-Hs00745041_s1	2	WVUTB	44	pT1c, N1a, M0	2A	pT1c, N1a, M0	1	F	Invasive ductal carcinoma	8500/3: Infiltrating duct carcinoma, NOS	2	2	Moderately differentiated	Frozen	positive/positive	negative	Pre menopausal		26.7041	10.4652	16.2388
2 RebeccaRepeat	Br 2 LDA 11-18-09 Plate 2	K4	T09-064-001	Invasive Carcinoma	ACOT4-Hs00745041_s1	3	WVUTB	44	pT1c, N1a, M0	2A	pT1c, N1a, M0	1	F	Invasive ductal carcinoma	8500/3: Infiltrating duct carcinoma, NOS	2	2	Moderately differentiated	Frozen	positive/positive	negative	Pre menopausal		26.8607	10.4652	16.3954
RebeccaRepeat	Br 2 LDA 9-28-09 Plate 1	O6	T09-089-001	Invasive Carcinoma	ACOT4-Hs00745041_s1	1	WVUTB	62	pT1c, N0, M0	1A	pT1c, N0, M0	0	F	Residual infiltrating ductal carcinoma	8500/3: Infiltrating duct carcinoma, NOS	1	2	Moderately differentiated	Frozen	positive/negative	positive			31.3911	10.9515	20.4396	20.8569
RebeccaRepeat	Br 2 LDA 9-28-09 Plate 1	O5	T09-089-001	Invasive Carcinoma	ACOT4-Hs00745041_s1	2	WVUTB	62	pT1c, N0, M0	1A	pT1c, N0, M0	0	F	Residual infiltrating ductal carcinoma	8500/3: Infiltrating duct carcinoma, NOS	1	2	Moderately differentiated	Frozen	positive/negative	positive			31.9864	10.9515	21.0349
RebeccaRepeat	Br 2 LDA 9-28-09 Plate 1	O4	T09-089-001	Invasive Carcinoma	ACOT4-Hs00745041_s1	3	WVUTB	62	pT1c, N0, M0	1A	pT1c, N0, M0	0	F	Residual infiltrating ductal carcinoma	8500/3: Infiltrating duct carcinoma, NOS	1	2	Moderately differentiated	Frozen	positive/negative	positive			32.0476	10.9515	21.0961
Rebecca	Br 2 LDA 12-7-09 Plate 1	K4	T09-122-007	Invasive Carcinoma	ACOT4-Hs00745041_s1	1	WVUTB	51	T2,N0,M0	2A	T2,N0,M0	0	F	Infiltrating Ductal Carcinoma	8500/3: Infiltrating duct carcinoma, NOS	2	3	Poorly Differentiated	Frozen	positive/positive	positive			27.2001	9.32693	17.8732	17.7807
Rebecca	Br 2 LDA 12-7-09 Plate 1	K5	T09-122-007	Invasive Carcinoma	ACOT4-Hs00745041_s1	2	WVUTB	51	T2,N0,M0	2A	T2,N0,M0	0	F	Infiltrating Ductal Carcinoma	8500/3: Infiltrating duct carcinoma, NOS	2	3	Poorly Differentiated	Frozen	positive/positive	positive			27.0862	9.32693	17.7593
Rebecca	Br 2 LDA 12-7-09 Plate 1	K6	T09-122-007	Invasive Carcinoma	ACOT4-Hs00745041_s1	3	WVUTB	51	T2,N0,M0	2A	T2,N0,M0	0	F	Infiltrating Ductal Carcinoma	8500/3: Infiltrating duct carcinoma, NOS	2	3	Poorly Differentiated	Frozen	positive/positive	positive			27.0365	9.32693	17.7096
2 RebeccaRepeat	Br 2 LDA 11-18-09 Plate 2	O5	T09-138-002	Invasive Carcinoma	ACOT4-Hs00745041_s1	1	WVUTB	70	T2pN0M0	2A	T2pN0M0	0	F	Infiltrating Ductal Carcinoma	8500/3: Infiltrating duct carcinoma, NOS	2	3	Poorly Differentiated	Frozen	negative/negative	negative	Post menopausal		27.9481	8.82736	19.1208	19.1496
2 RebeccaRepeat	Br 2 LDA 11-18-09 Plate 2	O6	T09-138-002	Invasive Carcinoma	ACOT4-Hs00745041_s1	2	WVUTB	70	T2pN0M0	2A	T2pN0M0	0	F	Infiltrating Ductal Carcinoma	8500/3: Infiltrating duct carcinoma, NOS	2	3	Poorly Differentiated	Frozen	negative/negative	negative	Post menopausal		27.9903	8.82736	19.1629
2 RebeccaRepeat	Br 2 LDA 11-18-09 Plate 2	O4	T09-138-002	Invasive Carcinoma	ACOT4-Hs00745041_s1	3	WVUTB	70	T2pN0M0	2A	T2pN0M0	0	F	Infiltrating Ductal Carcinoma	8500/3: Infiltrating duct carcinoma, NOS	2	3	Poorly Differentiated	Frozen	negative/negative	negative	Post menopausal		27.9926	8.82736	19.1653
Rebecca	Br 2 LDA 12-7-09 Plate 1	O4	T09-141-002	Invasive Carcinoma	ACOT4-Hs00745041_s1	1	WVUTB	75	pT2pN1aM0	2B	pT2pN1aM0	1	F	Invasive ductal carcinoma	8500/3: Infiltrating duct carcinoma, NOS	2	3	Poorly Differentiated	Frozen	negative/negative	negative	Post menopausal		27.9943	8.92162	19.0726	19.0158
Rebecca	Br 2 LDA 12-7-09 Plate 1	O5	T09-141-002	Invasive Carcinoma	ACOT4-Hs00745041_s1	2	WVUTB	75	pT2pN1aM0	2B	pT2pN1aM0	1	F	Invasive ductal carcinoma	8500/3: Infiltrating duct carcinoma, NOS	2	3	Poorly Differentiated	Frozen	negative/negative	negative	Post menopausal		27.9372	8.92162	19.0156
Rebecca	Br 2 LDA 12-7-09 Plate 1	O6	T09-141-002	Invasive Carcinoma	ACOT4-Hs00745041_s1	3	WVUTB	75	pT2pN1aM0	2B	pT2pN1aM0	1	F	Invasive ductal carcinoma	8500/3: Infiltrating duct carcinoma, NOS	2	3	Poorly Differentiated	Frozen	negative/negative	negative	Post menopausal		27.8808	8.92162	18.9592
Rebecca	Br 2 LDA 12-7-09 Plate 1	G4	T09-142-003	Invasive Carcinoma	ACOT4-Hs00745041_s1	1	WVUTB	37	pT2N3aM0	3C	pT2N3aM0	1	F	Infiltrating Ductal Carcinoma	8500/3: Infiltrating duct carcinoma, NOS	3	3	Poorly Differentiated	Frozen	negative/negative	negative			28.0919	9.15739	18.9345	18.7035
Rebecca	Br 2 LDA 12-7-09 Plate 1	G5	T09-142-003	Invasive Carcinoma	ACOT4-Hs00745041_s1	2	WVUTB	37	pT2N3aM0	3C	pT2N3aM0	1	F	Infiltrating Ductal Carcinoma	8500/3: Infiltrating duct carcinoma, NOS	3	3	Poorly Differentiated	Frozen	negative/negative	negative			28.0213	9.15739	18.8639
Rebecca	Br 2 LDA 12-7-09 Plate 1	G6	T09-142-003	Invasive Carcinoma	ACOT4-Hs00745041_s1	3	WVUTB	37	pT2N3aM0	3C	pT2N3aM0	1	F	Infiltrating Ductal Carcinoma	8500/3: Infiltrating duct carcinoma, NOS	3	3	Poorly Differentiated	Frozen	negative/negative	negative			27.4694	9.15739	18.312
Rebecca	Br 2 LDA 12-7-09 Plate 1	C4	T09-150-004	Invasive Carcinoma	ACOT4-Hs00745041_s1	1	WVUTB	82	pT2N1aM0	2B	pT2N1aM0	1	F	Invasive Ductal Carcinoma	8500/3: Infiltrating duct carcinoma, NOS	2	2	Moderately Differentiated	Frozen	positive/positive	negative	Post menopausal		28.1822	10.3239	17.8582	17.9096
Rebecca	Br 2 LDA 12-7-09 Plate 1	C5	T09-150-004	Invasive Carcinoma	ACOT4-Hs00745041_s1	2	WVUTB	82	pT2N1aM0	2B	pT2N1aM0	1	F	Invasive Ductal Carcinoma	8500/3: Infiltrating duct carcinoma, NOS	2	2	Moderately Differentiated	Frozen	positive/positive	negative	Post menopausal		28.2944	10.3239	17.9704
Rebecca	Br 2 LDA 12-7-09 Plate 1	C6	T09-150-004	Invasive Carcinoma	ACOT4-Hs00745041_s1	3	WVUTB	82	pT2N1aM0	2B	pT2N1aM0	1	F	Invasive Ductal Carcinoma	8500/3: Infiltrating duct carcinoma, NOS	2	2	Moderately Differentiated	Frozen	positive/positive	negative	Post menopausal		28.224	10.3239	17.9
RebeccaRepeat	Br 2 LDA 9-25-09 Plate 1	O6	Z3588A1B	Invasive Carcinoma	ACOT4-Hs00745041_s1	1	CHTN	NA	pT3, pN1, M1	4	pT3, pN1, M1	1	missing	Invasive Ductal Carcinoma	8500/3: Infiltrating duct carcinoma, NOS	4	3	Poorly Differentiated	Frozen & Paraffin					32.8159	10.0368	22.7791	23.0488
RebeccaRepeat	Br 2 LDA 9-25-09 Plate 1	O5	Z3588A1B	Invasive Carcinoma	ACOT4-Hs00745041_s1	2	CHTN	NA	pT3, pN1, M1	4	pT3, pN1, M1	1	missing	Invasive Ductal Carcinoma	8500/3: Infiltrating duct carcinoma, NOS	4	3	Poorly Differentiated	Frozen & Paraffin					32.9832	10.0368	22.9464
RebeccaRepeat	Br 2 LDA 9-25-09 Plate 1	O4	Z3588A1B	Invasive Carcinoma	ACOT4-Hs00745041_s1	3	CHTN	NA	pT3, pN1, M1	4	pT3, pN1, M1	1	missing	Invasive Ductal Carcinoma	8500/3: Infiltrating duct carcinoma, NOS	4	3	Poorly Differentiated	Frozen & Paraffin					33.4577	10.0368	23.4208
2 RebeccaRepeat	Br 2 LDA 11-9-09 Plate 1	G5	Z3740A1A	Invasive Carcinoma	ACOT4-Hs00745041_s1	1	CHTN	Missing	T3N0M0	2B	T3N0M0	0	missing	Metaplastic carcinoma with chondrosarcomatous elements	8010/3: Carcinoma, NOS	2	3	Poorly differentiated						31.0045	19.9441	11.0604	11.2413
2 RebeccaRepeat	Br 2 LDA 11-9-09 Plate 1	G6	Z3740A1A	Invasive Carcinoma	ACOT4-Hs00745041_s1	2	CHTN	Missing	T3N0M0	2B	T3N0M0	0	missing	Metaplastic carcinoma with chondrosarcomatous elements	8010/3: Carcinoma, NOS	2	3	Poorly differentiated						31.0801	19.9441	11.1359
2 RebeccaRepeat	Br 2 LDA 11-9-09 Plate 1	G4	Z3740A1A	Invasive Carcinoma	ACOT4-Hs00745041_s1	3	CHTN	Missing	T3N0M0	2B	T3N0M0	0	missing	Metaplastic carcinoma with chondrosarcomatous elements	8010/3: Carcinoma, NOS	2	3	Poorly differentiated						31.4718	19.9441	11.5277
2 RebeccaRepeat	Br 2 LDA 11-9-09 Plate 1	K5	Z3841A1A	Invasive Carcinoma	ACOT4-Hs00745041_s1	1	CHTN	Missing	T2N0M0	2A	T2N0M0	0	missing	Invasive Ductal Carcinoma	8500/3: Infiltrating duct carcinoma, NOS	2	3	Poorly Differentiated	Frozen & Paraffin	ordered	ordered			28.6785	19.6333	9.04519	9.12487
2 RebeccaRepeat	Br 2 LDA 11-9-09 Plate 1	K4	Z3841A1A	Invasive Carcinoma	ACOT4-Hs00745041_s1	2	CHTN	Missing	T2N0M0	2A	T2N0M0	0	missing	Invasive Ductal Carcinoma	8500/3: Infiltrating duct carcinoma, NOS	2	3	Poorly Differentiated	Frozen & Paraffin	ordered	ordered			28.7827	19.6333	9.1494
2 RebeccaRepeat	Br 2 LDA 11-9-09 Plate 1	K6	Z3841A1A	Invasive Carcinoma	ACOT4-Hs00745041_s1	3	CHTN	Missing	T2N0M0	2A	T2N0M0	0	missing	Invasive Ductal Carcinoma	8500/3: Infiltrating duct carcinoma, NOS	2	3	Poorly Differentiated	Frozen & Paraffin	ordered	ordered			28.8133	19.6333	9.18004
RebeccaLast	Br 2 LDA 1-7-10 Plate 1	C4	Z4142 A1F	Invasive Carcinoma	ACOT4-Hs00745041_s1	1	CHTN	NA	T3N1M0	3A	T3N1M0	1	F	Invasive Ductal Carcinoma	8500/3: Infiltrating duct carcinoma, NOS	3	3	Poorly Differentiated	Frozen & Paraffin	positive/positive	positive			29.858	13.2076	16.6504	17.1744
RebeccaLast	Br 2 LDA 1-7-10 Plate 1	C5	Z4142 A1F	Invasive Carcinoma	ACOT4-Hs00745041_s1	2	CHTN	NA	T3N1M0	3A	T3N1M0	1	F	Invasive Ductal Carcinoma	8500/3: Infiltrating duct carcinoma, NOS	3	3	Poorly Differentiated	Frozen & Paraffin	positive/positive	positive			30.2258	13.2076	17.0182
RebeccaLast	Br 2 LDA 1-7-10 Plate 1	C6	Z4142 A1F	Invasive Carcinoma	ACOT4-Hs00745041_s1	3	CHTN	NA	T3N1M0	3A	T3N1M0	1	F	Invasive Ductal Carcinoma	8500/3: Infiltrating duct carcinoma, NOS	3	3	Poorly Differentiated	Frozen & Paraffin	positive/positive	positive			31.0622	13.2076	17.8546
Jill	10-06-08 Samples 22-25Maricicass12-16	K1	1060163B3	normal	ACOT4-Hs00745041_s1	1	CHTN	65				normal				normal								28.4853	7.6645	20.8208	20.757	20.557	1.72088
Jill	10-06-08 Samples 22-25Maricicass12-16	K2	1060163B3	normal	ACOT4-Hs00745041_s1	2	CHTN	65				normal				normal								28.3958	7.6645	20.7313
Jill	10-06-08 Samples 22-25Maricicass12-16	K3	1060163B3	normal	ACOT4-Hs00745041_s1	3	CHTN	65				normal				normal								28.3833	7.6645	20.7188
Rebecca	Br 2 LDA 8-27-09 Plate 1	C5	3061119C4	normal	ACOT4-Hs00745041_s1	1	CHTN	74				normal	F			normal			Frozen					31.5469	10.5695	20.9773	21.1547
Rebecca	Br 2 LDA 8-27-09 Plate 1	C6	3061119C4	normal	ACOT4-Hs00745041_s1	2	CHTN	74				normal	F			normal			Frozen					31.7387	10.5695	21.1691
Rebecca	Br 2 LDA 8-27-09 Plate 1	C4	3061119C4	normal	ACOT4-Hs00745041_s1	3	CHTN	74				normal	F			normal			Frozen					31.8872	10.5695	21.3176
Rebecca	Br 2 LDA 8-21-09 Plate 1	G5	3062104B6	normal	ACOT4-Hs00745041_s1	1	CHTN	52				normal	F			normal								31.3583	9.61416	21.7442	21.8905
Rebecca	Br 2 LDA 8-21-09 Plate 1	G4	3062104B6	normal	ACOT4-Hs00745041_s1	2	CHTN	52				normal	F			normal								31.3687	9.61416	21.7546
Rebecca	Br 2 LDA 8-21-09 Plate 1	G6	3062104B6	normal	ACOT4-Hs00745041_s1	3	CHTN	52				normal	F			normal								31.7869	9.61416	22.1728
Rebecca	Br 2 LDA 8-25-09 Plate 1	K6	4060634B10	normal	ACOT4-Hs00745041_s1	1	CHTN	79				normal	F			normal			Frozen					31.4004	10.8951	20.5052	20.9481
Rebecca	Br 2 LDA 8-25-09 Plate 1	K5	4060634B10	normal	ACOT4-Hs00745041_s1	2	CHTN	79				normal	F			normal			Frozen					31.7853	10.8951	20.8902
Rebecca	Br 2 LDA 8-25-09 Plate 1	K4	4060634B10	normal	ACOT4-Hs00745041_s1	3	CHTN	79				normal	F			normal			Frozen					32.344	10.8951	21.4489
Rebecca	Br 2 LDA 8-25-09 Plate 1	C5	T07-081-003	normal	ACOT4-Hs00745041_s1	1	WVUTB	40				normal	F			normal								31.809	10.489	21.32	21.6006
Rebecca	Br 2 LDA 8-25-09 Plate 1	C4	T07-081-003	normal	ACOT4-Hs00745041_s1	2	WVUTB	40				normal	F			normal								32.0885	10.489	21.5995
Rebecca	Br 2 LDA 8-25-09 Plate 1	C6	T07-081-003	normal	ACOT4-Hs00745041_s1	3	WVUTB	40				normal	F			normal								32.3712	10.489	21.8822
Rebecca	Br 2 LDA 8-25-09 Plate 1	G6	T07-197-003	normal	ACOT4-Hs00745041_s1	1	WVUTB	43				normal	F			normal			Frozen					30.0017	10.9588	19.0429	19.3828
Rebecca	Br 2 LDA 8-25-09 Plate 1	G5	T07-197-003	normal	ACOT4-Hs00745041_s1	2	WVUTB	43				normal	F			normal			Frozen					30.4125	10.9588	19.4536
Rebecca	Br 2 LDA 8-25-09 Plate 1	G4	T07-197-003	normal	ACOT4-Hs00745041_s1	3	WVUTB	43				normal	F			normal			Frozen					30.6106	10.9588	19.6518
Rebecca	Br 2 LDA 8-27-09 Plate 1	K5	T09-045-001	normal	ACOT4-Hs00745041_s1	1	WVUTB	39				normal	F			normal			Frozen					31.0666	8.89414	22.1725	22.3838
Rebecca	Br 2 LDA 8-27-09 Plate 1	K6	T09-045-001	normal	ACOT4-Hs00745041_s1	2	WVUTB	39				normal	F			normal			Frozen					31.1885	8.89414	22.2943
Rebecca	Br 2 LDA 8-27-09 Plate 1	K4	T09-045-001	normal	ACOT4-Hs00745041_s1	3	WVUTB	39				normal	F			normal			Frozen					31.5788	8.89414	22.6847
Rebecca	Br 2 LDA 8-27-09 Plate 1	O5	T09-047-002	normal	ACOT4-Hs00745041_s1	1	WVUTB	51				normal	F			normal			Frozen					29.7106	9.98865	19.722	19.8857
Rebecca	Br 2 LDA 8-27-09 Plate 1	O6	T09-047-002	normal	ACOT4-Hs00745041_s1	2	WVUTB	51				normal	F			normal			Frozen					29.9375	9.98865	19.9488
Rebecca	Br 2 LDA 8-27-09 Plate 1	O4	T09-047-002	normal	ACOT4-Hs00745041_s1	3	WVUTB	51				normal	F			normal			Frozen					29.9748	9.98865	19.9862
Rebecca	Br 2 LDA 8-27-09 Plate 1	G5	T09-064-003	normal	ACOT4-Hs00745041_s1	1	WVUTB	44				normal	F			normal			Frozen					32.7787	9.73424	23.0444	23.5717
Rebecca	Br 2 LDA 8-27-09 Plate 1	G4	T09-064-003	normal	ACOT4-Hs00745041_s1	2	WVUTB	44				normal	F			normal			Frozen					33.001	9.73424	23.2667
Rebecca	Br 2 LDA 8-27-09 Plate 1	G6	T09-064-003	normal	ACOT4-Hs00745041_s1	3	WVUTB	44				normal	F			normal			Frozen					34.1382	9.73424	24.4039
Rebecca	Br 2 LDA 12-8-09 Plate 1	O4	T09-089-002	normal	ACOT4-Hs00745041_s1	1	WVUTB	62				normal				normal			Frozen					31.9629	12.8687	19.0942	18.8147
Rebecca	Br 2 LDA 12-8-09 Plate 1	O5	T09-089-002	normal	ACOT4-Hs00745041_s1	2	WVUTB	62				normal				normal			Frozen					31.5393	12.8687	18.6706
Rebecca	Br 2 LDA 12-8-09 Plate 1	O6	T09-089-002	normal	ACOT4-Hs00745041_s1	3	WVUTB	62				normal				normal			Frozen					31.5479	12.8687	18.6792
Rebecca	Br 2 LDA 12-8-09 Plate 1	C4	T09-122-002	normal	ACOT4-Hs00745041_s1	1	WVUTB	51				normal				normal			Frozen					29.4741	11.4183	18.0557	17.7923
Rebecca	Br 2 LDA 12-8-09 Plate 1	C5	T09-122-002	normal	ACOT4-Hs00745041_s1	2	WVUTB	51				normal				normal			Frozen					28.9939	11.4183	17.5756
Rebecca	Br 2 LDA 12-8-09 Plate 1	C6	T09-122-002	normal	ACOT4-Hs00745041_s1	3	WVUTB	51				normal				normal			Frozen					29.1641	11.4183	17.7457
Rebecca	Br 2 LDA 8-24-09 Plate 1	O5	Z3841A2A	normal	ACOT4-Hs00745041_s1	1	CHTN	Missing				normal	missing			normal			Frozen & Paraffin					28.2068	9.94032	18.2664	18.5018
Rebecca	Br 2 LDA 8-24-09 Plate 1	O6	Z3841A2A	normal	ACOT4-Hs00745041_s1	2	CHTN	Missing				normal	missing			normal			Frozen & Paraffin					28.4234	9.94032	18.483
Rebecca	Br 2 LDA 8-24-09 Plate 1	O4	Z3841A2A	normal	ACOT4-Hs00745041_s1	3	CHTN	Missing				normal	missing			normal			Frozen & Paraffin					28.6962	9.94032	18.7559
2 RebeccaRepeat	Br 2 LDA 11-10-09 Plate 1	O4	1082304A4	Sarcoma	ACOT4-Hs00745041_s1	1	CHTN	79	T4, N0,M0	3B	T4, N0,M0	0	F	Spindle Cell Sarcoma	8801/3: Spindle cell sarcoma	3	2	Moderately Differentiated		negative/negative	negative			27.2121	5.72147	21.4906	21.5909	22.9264	1.88877	0.19352	0.300374
2 RebeccaRepeat	Br 2 LDA 11-10-09 Plate 1	O5	1082304A4	Sarcoma	ACOT4-Hs00745041_s1	2	CHTN	79	T4, N0,M0	3B	T4, N0,M0	0	F	Spindle Cell Sarcoma	8801/3: Spindle cell sarcoma	3	2	Moderately Differentiated		negative/negative	negative			27.3382	5.72147	21.6168
2 RebeccaRepeat	Br 2 LDA 11-10-09 Plate 1	O6	1082304A4	Sarcoma	ACOT4-Hs00745041_s1	3	CHTN	79	T4, N0,M0	3B	T4, N0,M0	0	F	Spindle Cell Sarcoma	8801/3: Spindle cell sarcoma	3	2	Moderately Differentiated		negative/negative	negative			27.3867	5.72147	21.6652
RebeccaRepeat	Br 2 LDA 9-29-09 Plate 1	G5	T04-104-006	Sarcoma	ACOT4-Hs00745041_s1	1	WVUTB	56	T4, N0, M0	1	T4, N0, M0	0	F	Recurrent Cystosarcoma Phyllodes		1	N/A	N/A	Frozen					33.7172	10.2202	23.497	24.262
RebeccaRepeat	Br 2 LDA 9-29-09 Plate 1	G6	T04-104-006	Sarcoma	ACOT4-Hs00745041_s1	2	WVUTB	56	T4, N0, M0	1	T4, N0, M0	0	F	Recurrent Cystosarcoma Phyllodes		1	N/A	N/A	Frozen					34.0283	10.2202	23.8081
RebeccaRepeat	Br 2 LDA 9-29-09 Plate 1	G4	T04-104-006	Sarcoma	ACOT4-Hs00745041_s1	3	WVUTB	56	T4, N0, M0	1	T4, N0, M0	0	F	Recurrent Cystosarcoma Phyllodes		1	N/A	N/A	Frozen					35.7011	10.2202	25.4809
Jill	10-09-08 Samples 50-53s40-44	G4	T0426310	DCIS	DDOST-Hs00193263_m1	1	WVUTB	63		0		0		DCIS		0	3	Poorly differentiated						25.348	8.64477	16.7033	16.5686	14.809	1.5239	0.971284	0.967381
Jill	10-09-08 Samples 50-53s40-44	G5	T0426310	DCIS	DDOST-Hs00193263_m1	2	WVUTB	63		0		0		DCIS		0	3	Poorly differentiated						25.1092	8.64477	16.4645
Jill	10-09-08 Samples 50-53s40-44	G6	T0426310	DCIS	DDOST-Hs00193263_m1	3	WVUTB	63		0		0		DCIS		0	3	Poorly differentiated						25.1829	8.64477	16.5381
Jill	10-07-08 Samples 26-29s-17-20	G4	T06449	DCIS	DDOST-Hs00193263_m1	1	WVUTB	56		0		0		DCIS		0	3	Poorly differentiated						22.3273	8.26771	14.0596	13.9416
Jill	10-07-08 Samples 26-29s-17-20	G5	T06449	DCIS	DDOST-Hs00193263_m1	2	WVUTB	56		0		0		DCIS		0	3	Poorly differentiated						22.5999	8.26771	14.3322
Jill	10-07-08 Samples 26-29s-17-20	G6	T06449	DCIS	DDOST-Hs00193263_m1	3	WVUTB	56		0		0		DCIS		0	3	Poorly differentiated						21.7007	8.26771	13.4329
2 RebeccaRepeat	Br 2 LDA 11-18-09 Plate 2	G8	T09-045-003	DCIS	DDOST-Hs00193263_m1	1	WVUTB	39	pTis, pN1mi, pMx	0	pTis, pN1mi, pMx	0	F	DCIS		0	1	Well-Differentiated	Frozen	negative / negative	not addressed			24.3741	10.5131	13.861	13.9169
2 RebeccaRepeat	Br 2 LDA 11-18-09 Plate 2	G7	T09-045-003	DCIS	DDOST-Hs00193263_m1	2	WVUTB	39	pTis, pN1mi, pMx	0	pTis, pN1mi, pMx	0	F	DCIS		0	1	Well-Differentiated	Frozen	negative / negative	not addressed			24.4286	10.5131	13.9155
2 RebeccaRepeat	Br 2 LDA 11-18-09 Plate 2	G9	T09-045-003	DCIS	DDOST-Hs00193263_m1	3	WVUTB	39	pTis, pN1mi, pMx	0	pTis, pN1mi, pMx	0	F	DCIS		0	1	Well-Differentiated	Frozen	negative / negative	not addressed			24.4871	10.5131	13.9741
Jill	10-02-08 Samples 9-12	C4	1060163A9	Invasive Carcinoma	DDOST-Hs00193263_m1	1	CHTN	65	T2N0M0	2A	T2N0M0	0		invasive ductal carcinoma	8500/3: Infiltrating duct carcinoma, NOS	2	3	Poorly differentiated		negative/negative	intermediate: test to be repeated	Postmenopausal		21.9669	9.98487	11.9821	11.2507	13.3758	2.73063	2.62294	0.00486149
Jill	10-02-08 Samples 9-12	C5	1060163A9	Invasive Carcinoma	DDOST-Hs00193263_m1	2	CHTN	65	T2N0M0	2A	T2N0M0	0		invasive ductal carcinoma	8500/3: Infiltrating duct carcinoma, NOS	2	3	Poorly differentiated		negative/negative	intermediate: test to be repeated	Postmenopausal		20.7682	9.98487	10.7833
Jill	10-02-08 Samples 9-12	C6	1060163A9	Invasive Carcinoma	DDOST-Hs00193263_m1	3	CHTN	65	T2N0M0	2A	T2N0M0	0		invasive ductal carcinoma	8500/3: Infiltrating duct carcinoma, NOS	2	3	Poorly differentiated		negative/negative	intermediate: test to be repeated	Postmenopausal		20.9716	9.98487	10.9868
RebeccaRepeat	Br 2 LDA 9-29-09 Plate 1	C8	1060568A18	Invasive Carcinoma	DDOST-Hs00193263_m1	1	CHTN	50	T4, N1, M0	3B	T4, N1, M0	1	F	Invasive ductal carcinoma	8500/3: Infiltrating duct carcinoma, NOS	3	3	Poorly differentiated		positive/negative	negative			26.188	10.3972	15.7908	15.8098
RebeccaRepeat	Br 2 LDA 9-29-09 Plate 1	C9	1060568A18	Invasive Carcinoma	DDOST-Hs00193263_m1	2	CHTN	50	T4, N1, M0	3B	T4, N1, M0	1	F	Invasive ductal carcinoma	8500/3: Infiltrating duct carcinoma, NOS	3	3	Poorly differentiated		positive/negative	negative			26.2065	10.3972	15.8093
RebeccaRepeat	Br 2 LDA 9-29-09 Plate 1	C7	1060568A18	Invasive Carcinoma	DDOST-Hs00193263_m1	3	CHTN	50	T4, N1, M0	3B	T4, N1, M0	1	F	Invasive ductal carcinoma	8500/3: Infiltrating duct carcinoma, NOS	3	3	Poorly differentiated		positive/negative	negative			26.2263	10.3972	15.8291
Jill	10-06-08 Samples 18-21s-09-12	C4	1060950A1	Invasive Carcinoma	DDOST-Hs00193263_m1	1	CHTN	63	T1cN0M0	1A	T1cN0M0	0		infiltrating ductal carcinoma, cribriform subtype	8500/3: Infiltrating duct carcinoma, NOS	1	1	Well-differentiated		positive/positive	negative			20.1748	6.92383	13.2509	12.8562
Jill	10-06-08 Samples 18-21s-09-12	C5	1060950A1	Invasive Carcinoma	DDOST-Hs00193263_m1	2	CHTN	63	T1cN0M0	1A	T1cN0M0	0		infiltrating ductal carcinoma, cribriform subtype	8500/3: Infiltrating duct carcinoma, NOS	1	1	Well-differentiated		positive/positive	negative			19.3643	6.92383	12.4405
Jill	10-06-08 Samples 18-21s-09-12	C6	1060950A1	Invasive Carcinoma	DDOST-Hs00193263_m1	3	CHTN	63	T1cN0M0	1A	T1cN0M0	0		infiltrating ductal carcinoma, cribriform subtype	8500/3: Infiltrating duct carcinoma, NOS	1	1	Well-differentiated		positive/positive	negative			19.801	6.92383	12.8772
Jill	10-06-08 Samples 13-16-s-08-09	C4	1061053A1	Invasive Carcinoma	DDOST-Hs00193263_m1	1	CHTN	36	T3N1aM0	3A	T3N1aM0	1		infiltrating ductal carcinoma	8500/3: Infiltrating duct carcinoma, NOS	3	2	Moderately differentiated		positive/positive	(+1) probably negative	Premenopausal		18.1706	6.34086	11.8297	11.813
Jill	10-06-08 Samples 13-16-s-08-09	C5	1061053A1	Invasive Carcinoma	DDOST-Hs00193263_m1	2	CHTN	36	T3N1aM0	3A	T3N1aM0	1		infiltrating ductal carcinoma	8500/3: Infiltrating duct carcinoma, NOS	3	2	Moderately differentiated		positive/positive	(+1) probably negative	Premenopausal		17.7458	6.34086	11.4049
Jill	10-06-08 Samples 13-16-s-08-09	C6	1061053A1	Invasive Carcinoma	DDOST-Hs00193263_m1	3	CHTN	36	T3N1aM0	3A	T3N1aM0	1		infiltrating ductal carcinoma	8500/3: Infiltrating duct carcinoma, NOS	3	2	Moderately differentiated		positive/positive	(+1) probably negative	Premenopausal		18.5452	6.34086	12.2043
RebeccaRepeat	Br 2 LDA 9-28-09 Plate 1	C7	1061562A15	Invasive Carcinoma	DDOST-Hs00193263_m1	1	CHTN	60	T2, N0, M0	2A	T2, N0, M0	0	F	Mucinous Adenocarcinoma	8480/3: Mucinous adenocarcinoma	2	1	Well-Differentiated	Frozen & Paraffin	positive/positive	negative			23.2122	9.96153	13.2506	13.2585
RebeccaRepeat	Br 2 LDA 9-28-09 Plate 1	C9	1061562A15	Invasive Carcinoma	DDOST-Hs00193263_m1	2	CHTN	60	T2, N0, M0	2A	T2, N0, M0	0	F	Mucinous Adenocarcinoma	8480/3: Mucinous adenocarcinoma	2	1	Well-Differentiated	Frozen & Paraffin	positive/positive	negative			23.2183	9.96153	13.2567
RebeccaRepeat	Br 2 LDA 9-28-09 Plate 1	C8	1061562A15	Invasive Carcinoma	DDOST-Hs00193263_m1	3	CHTN	60	T2, N0, M0	2A	T2, N0, M0	0	F	Mucinous Adenocarcinoma	8480/3: Mucinous adenocarcinoma	2	1	Well-Differentiated	Frozen & Paraffin	positive/positive	negative			23.2298	9.96153	13.2683
Jill	10-06-08 Samples 18-21s-09-12	O4	1061897A3	Invasive Carcinoma	DDOST-Hs00193263_m1	1	CHTN	85	T2N2aM0	3A	T2N2aM0	1		invasive lobular carcinoma	8524/3: Infiltrating lobular mixed with other types of ca.	3	1	Well-differentiated		positive/positive	negative	Postmenopausal		22.3984	7.70997	14.6885	14.7413
Jill	10-06-08 Samples 18-21s-09-12	O5	1061897A3	Invasive Carcinoma	DDOST-Hs00193263_m1	2	CHTN	85	T2N2aM0	3A	T2N2aM0	1		invasive lobular carcinoma	8524/3: Infiltrating lobular mixed with other types of ca.	3	1	Well-differentiated		positive/positive	negative	Postmenopausal		22.2921	7.70997	14.5821
Jill	10-06-08 Samples 18-21s-09-12	O6	1061897A3	Invasive Carcinoma	DDOST-Hs00193263_m1	3	CHTN	85	T2N2aM0	3A	T2N2aM0	1		invasive lobular carcinoma	8524/3: Infiltrating lobular mixed with other types of ca.	3	1	Well-differentiated		positive/positive	negative	Postmenopausal		22.6632	7.70997	14.9532
RebeccaRepeat	Br 2 LDA 9-28-09 Plate 2	C7	1062323A6	Invasive Carcinoma	DDOST-Hs00193263_m1	1	CHTN	62	T2N0M0	2A	T2N0M0	0	F	Infiltrating Ductal Carcinoma	8500/3: Infiltrating duct carcinoma, NOS	2	3	Poorly Differentiated	Frozen & Paraffin	negative/negative	negative			25.2874	8.83488	16.4525	16.6923
RebeccaRepeat	Br 2 LDA 9-28-09 Plate 2	C8	1062323A6	Invasive Carcinoma	DDOST-Hs00193263_m1	2	CHTN	62	T2N0M0	2A	T2N0M0	0	F	Infiltrating Ductal Carcinoma	8500/3: Infiltrating duct carcinoma, NOS	2	3	Poorly Differentiated	Frozen & Paraffin	negative/negative	negative			25.4693	8.83488	16.6344
RebeccaRepeat	Br 2 LDA 9-28-09 Plate 2	C9	1062323A6	Invasive Carcinoma	DDOST-Hs00193263_m1	3	CHTN	62	T2N0M0	2A	T2N0M0	0	F	Infiltrating Ductal Carcinoma	8500/3: Infiltrating duct carcinoma, NOS	2	3	Poorly Differentiated	Frozen & Paraffin	negative/negative	negative			25.8247	8.83488	16.9899
RebeccaRepeat	Br 2 LDA 9-28-09 Plate 1	G9	1070062A1	Invasive Carcinoma	DDOST-Hs00193263_m1	1	CHTN	49	T2N0M0	2A	T2N0M0	0	F	Ductal Adenocarcinoma	8500/3: Infiltrating duct carcinoma, NOS	2	3	Poorly differentiated		positive/positive	negative			22.2897	9.88308	12.4066	12.5165
RebeccaRepeat	Br 2 LDA 9-28-09 Plate 1	G7	1070062A1	Invasive Carcinoma	DDOST-Hs00193263_m1	2	CHTN	49	T2N0M0	2A	T2N0M0	0	F	Ductal Adenocarcinoma	8500/3: Infiltrating duct carcinoma, NOS	2	3	Poorly differentiated		positive/positive	negative			22.3945	9.88308	12.5114
RebeccaRepeat	Br 2 LDA 9-28-09 Plate 1	G8	1070062A1	Invasive Carcinoma	DDOST-Hs00193263_m1	3	CHTN	49	T2N0M0	2A	T2N0M0	0	F	Ductal Adenocarcinoma	8500/3: Infiltrating duct carcinoma, NOS	2	3	Poorly differentiated		positive/positive	negative			22.5146	9.88308	12.6315
Jill	10-06-08 Samples 22-25Maricicass12-16	O4	1070512A1	Invasive Carcinoma	DDOST-Hs00193263_m1	1	CHTN	80	T1cN0M0	1A	T1cN0M0	0		invasive ductal carcinoma	8500/3: Infiltrating duct carcinoma, NOS	1	2	Moderately differentiated		positive/positive	negative			22.8637	6.83775	16.0259	15.9557
Jill	10-06-08 Samples 22-25Maricicass12-16	O5	1070512A1	Invasive Carcinoma	DDOST-Hs00193263_m1	2	CHTN	80	T1cN0M0	1A	T1cN0M0	0		invasive ductal carcinoma	8500/3: Infiltrating duct carcinoma, NOS	1	2	Moderately differentiated		positive/positive	negative			22.7663	6.83775	15.9286
Jill	10-06-08 Samples 22-25Maricicass12-16	O6	1070512A1	Invasive Carcinoma	DDOST-Hs00193263_m1	3	CHTN	80	T1cN0M0	1A	T1cN0M0	0		invasive ductal carcinoma	8500/3: Infiltrating duct carcinoma, NOS	1	2	Moderately differentiated		positive/positive	negative			22.7503	6.83775	15.9126
2 RebeccaRepeat	Br 2 LDA 11-18-09 Plate 1	O8	1072014A5	Invasive Carcinoma	DDOST-Hs00193263_m1	1	CHTN	49	T3N0M0	2B	T3N0M0	0	F	Invasive ductal carcinoma	8500/3: Infiltrating duct carcinoma, NOS	2	3	Poorly differentiated		positive/positive	positive			23.9432	5.80943	18.1338	18.2406
2 RebeccaRepeat	Br 2 LDA 11-18-09 Plate 1	O9	1072014A5	Invasive Carcinoma	DDOST-Hs00193263_m1	2	CHTN	49	T3N0M0	2B	T3N0M0	0	F	Invasive ductal carcinoma	8500/3: Infiltrating duct carcinoma, NOS	2	3	Poorly differentiated		positive/positive	positive			24.0604	5.80943	18.251
2 RebeccaRepeat	Br 2 LDA 11-18-09 Plate 1	O7	1072014A5	Invasive Carcinoma	DDOST-Hs00193263_m1	3	CHTN	49	T3N0M0	2B	T3N0M0	0	F	Invasive ductal carcinoma	8500/3: Infiltrating duct carcinoma, NOS	2	3	Poorly differentiated		positive/positive	positive			24.1464	5.80943	18.3369
RebeccaRepeat	Br 2 LDA 9-25-09 Plate 1	C7	1080312A4	Invasive Carcinoma	DDOST-Hs00193263_m1	1	CHTN	71	T2N1M0	2B	T2N1M0	1	F	Invasive Ductal Carcinoma	8500/3: Infiltrating duct carcinoma, NOS	2	2	Moderately differentiated	Frozen& Paraffin	positive/positive	negative			25.496	10.076	15.42	15.4832
RebeccaRepeat	Br 2 LDA 9-25-09 Plate 1	C8	1080312A4	Invasive Carcinoma	DDOST-Hs00193263_m1	2	CHTN	71	T2N1M0	2B	T2N1M0	1	F	Invasive Ductal Carcinoma	8500/3: Infiltrating duct carcinoma, NOS	2	2	Moderately differentiated	Frozen& Paraffin	positive/positive	negative			25.5657	10.076	15.4897
RebeccaRepeat	Br 2 LDA 9-25-09 Plate 1	C9	1080312A4	Invasive Carcinoma	DDOST-Hs00193263_m1	3	CHTN	71	T2N1M0	2B	T2N1M0	1	F	Invasive Ductal Carcinoma	8500/3: Infiltrating duct carcinoma, NOS	2	2	Moderately differentiated	Frozen& Paraffin	positive/positive	negative			25.6159	10.076	15.54
2 RebeccaRepeat	Br 2 LDA 10-26-09 Plate 2 mirVana	G9	1080502A1	Invasive Carcinoma	DDOST-Hs00193263_m1	1	CHTN	42	T2N0M0	2A	T2N0M0	0	F	Invasive Ductal Carcinoma	8500/3: Infiltrating duct carcinoma, NOS	2	3	Poorly differentiated	Frozen& Paraffin	pending	pending			25.5283	14.3589	11.1694	11.236
2 RebeccaRepeat	Br 2 LDA 10-26-09 Plate 2 mirVana	G8	1080502A1	Invasive Carcinoma	DDOST-Hs00193263_m1	2	CHTN	42	T2N0M0	2A	T2N0M0	0	F	Invasive Ductal Carcinoma	8500/3: Infiltrating duct carcinoma, NOS	2	3	Poorly differentiated	Frozen& Paraffin	pending	pending			25.5989	14.3589	11.24
2 RebeccaRepeat	Br 2 LDA 10-26-09 Plate 2 mirVana	G7	1080502A1	Invasive Carcinoma	DDOST-Hs00193263_m1	3	CHTN	42	T2N0M0	2A	T2N0M0	0	F	Invasive Ductal Carcinoma	8500/3: Infiltrating duct carcinoma, NOS	2	3	Poorly differentiated	Frozen& Paraffin	pending	pending			25.6573	14.3589	11.2984
2 RebeccaRepeat	Br 2 LDA 10-26-09 Plate 2 mirVana	C8	1080719B5	Invasive Carcinoma	DDOST-Hs00193263_m1	1	CHTN	64	T3N0M0	2B	T3N0M0	0	F	Invasive Ductal Carcinoma	8500/3: Infiltrating duct carcinoma, NOS	2	3	Poorly Differentiated	Frozen & Paraffin	ordered	ordered			25.8897	16.0027	9.88703	9.90532
2 RebeccaRepeat	Br 2 LDA 10-26-09 Plate 2 mirVana	C9	1080719B5	Invasive Carcinoma	DDOST-Hs00193263_m1	2	CHTN	64	T3N0M0	2B	T3N0M0	0	F	Invasive Ductal Carcinoma	8500/3: Infiltrating duct carcinoma, NOS	2	3	Poorly Differentiated	Frozen & Paraffin	ordered	ordered			25.9009	16.0027	9.89826
2 RebeccaRepeat	Br 2 LDA 10-26-09 Plate 2 mirVana	C7	1080719B5	Invasive Carcinoma	DDOST-Hs00193263_m1	3	CHTN	64	T3N0M0	2B	T3N0M0	0	F	Invasive Ductal Carcinoma	8500/3: Infiltrating duct carcinoma, NOS	2	3	Poorly Differentiated	Frozen & Paraffin	ordered	ordered			25.9333	16.0027	9.93066
2 RebeccaRepeat	Br 2 LDA 10-26-09 Plate 2 mirVana	K7	1081454A6	Invasive Carcinoma	DDOST-Hs00193263_m1	1	CHTN	51	T2N0M0	2A	T2N0M0	0	M	Invasive Ductal Carcinoma	8500/3: Infiltrating duct carcinoma, NOS	2	3	Poorly Differentiated	Frozen & Paraffin	positive / negative	negative			25.1028	13.9592	11.1435	11.1576
2 RebeccaRepeat	Br 2 LDA 10-26-09 Plate 2 mirVana	K9	1081454A6	Invasive Carcinoma	DDOST-Hs00193263_m1	2	CHTN	51	T2N0M0	2A	T2N0M0	0	M	Invasive Ductal Carcinoma	8500/3: Infiltrating duct carcinoma, NOS	2	3	Poorly Differentiated	Frozen & Paraffin	positive / negative	negative			25.1111	13.9592	11.1519
2 RebeccaRepeat	Br 2 LDA 10-26-09 Plate 2 mirVana	K8	1081454A6	Invasive Carcinoma	DDOST-Hs00193263_m1	3	CHTN	51	T2N0M0	2A	T2N0M0	0	M	Invasive Ductal Carcinoma	8500/3: Infiltrating duct carcinoma, NOS	2	3	Poorly Differentiated	Frozen & Paraffin	positive / negative	negative			25.1366	13.9592	11.1774
Jill	10-06-08 Samples 18-21s-09-12	G4	3061119A4	Invasive Carcinoma	DDOST-Hs00193263_m1	1	CHTN	74	T2N0M0	2A	T2N0M0	0		infiltrating ductal carcinoma with mucinous differentiation	8523/3: Infiltrating duct mixed with other types of ca.	2	1	Well-differentiated						20.8816	8.0076	12.874	12.4334
Jill	10-06-08 Samples 18-21s-09-12	G5	3061119A4	Invasive Carcinoma	DDOST-Hs00193263_m1	2	CHTN	74	T2N0M0	2A	T2N0M0	0		infiltrating ductal carcinoma with mucinous differentiation	8523/3: Infiltrating duct mixed with other types of ca.	2	1	Well-differentiated						19.9303	8.0076	11.9227
Jill	10-06-08 Samples 18-21s-09-12	G6	3061119A4	Invasive Carcinoma	DDOST-Hs00193263_m1	3	CHTN	74	T2N0M0	2A	T2N0M0	0		infiltrating ductal carcinoma with mucinous differentiation	8523/3: Infiltrating duct mixed with other types of ca.	2	1	Well-differentiated						20.5112	8.0076	12.5036
2 RebeccaRepeat	Br 2 LDA 11-18-09 Plate 1	K7	3062104A7	Invasive Carcinoma	DDOST-Hs00193263_m1	1	CHTN	52	T2, N0, M0	2A	T2, N0, M0	0	F	Invasive ductal carcinoma	8500/3: Infiltrating duct carcinoma, NOS	2	3	Poorly Differentiated						24.2897	5.27169	19.018	19.0462
2 RebeccaRepeat	Br 2 LDA 11-18-09 Plate 1	K8	3062104A7	Invasive Carcinoma	DDOST-Hs00193263_m1	2	CHTN	52	T2, N0, M0	2A	T2, N0, M0	0	F	Invasive ductal carcinoma	8500/3: Infiltrating duct carcinoma, NOS	2	3	Poorly Differentiated						24.2784	5.27169	19.0067
2 RebeccaRepeat	Br 2 LDA 11-18-09 Plate 1	K9	3062104A7	Invasive Carcinoma	DDOST-Hs00193263_m1	3	CHTN	52	T2, N0, M0	2A	T2, N0, M0	0	F	Invasive ductal carcinoma	8500/3: Infiltrating duct carcinoma, NOS	2	3	Poorly Differentiated						24.3854	5.27169	19.1137
Jill	10-06-08 Samples 13-16-s-08-09	K4	3070617A7	Invasive Carcinoma	DDOST-Hs00193263_m1	1	CHTN	83	T3N0M0	2B	T3N0M0	0		infiltrating ductal carcinoma	8500/3: Infiltrating duct carcinoma, NOS	2	2	Moderately differentiated		positive/positive				20.7622	10.0795	10.6827	10.8564
Jill	10-06-08 Samples 13-16-s-08-09	K5	3070617A7	Invasive Carcinoma	DDOST-Hs00193263_m1	2	CHTN	83	T3N0M0	2B	T3N0M0	0		infiltrating ductal carcinoma	8500/3: Infiltrating duct carcinoma, NOS	2	2	Moderately differentiated		positive/positive				21.1275	10.0795	11.048
Jill	10-06-08 Samples 13-16-s-08-09	K6	3070617A7	Invasive Carcinoma	DDOST-Hs00193263_m1	3	CHTN	83	T3N0M0	2B	T3N0M0	0		infiltrating ductal carcinoma	8500/3: Infiltrating duct carcinoma, NOS	2	2	Moderately differentiated		positive/positive				20.9182	10.0795	10.8387
Jill	10-06-08 Samples 22-25Maricicass12-16	G4	4060634A10	Invasive Carcinoma	DDOST-Hs00193263_m1	1	CHTN	79	T2N0M0	2A	T2N0M0	0		infiltrating ductal carcinoma with foci of cartilagginous metaplasia (metaplastic carcinoma)	8523/3: Infiltrating duct mixed with other types of ca.	2	3	Poorly differentiated						23.0225	8.78822	14.2343	14.187
Jill	10-06-08 Samples 22-25Maricicass12-16	G5	4060634A10	Invasive Carcinoma	DDOST-Hs00193263_m1	2	CHTN	79	T2N0M0	2A	T2N0M0	0		infiltrating ductal carcinoma with foci of cartilagginous metaplasia (metaplastic carcinoma)	8523/3: Infiltrating duct mixed with other types of ca.	2	3	Poorly differentiated						23.5663	8.78822	14.7781
Jill	10-06-08 Samples 22-25Maricicass12-16	G6	4060634A10	Invasive Carcinoma	DDOST-Hs00193263_m1	3	CHTN	79	T2N0M0	2A	T2N0M0	0		infiltrating ductal carcinoma with foci of cartilagginous metaplasia (metaplastic carcinoma)	8523/3: Infiltrating duct mixed with other types of ca.	2	3	Poorly differentiated						22.337	8.78822	13.5488
Jill	10-02-08 Samples 9-12	K4	4061094B24	Invasive Carcinoma	DDOST-Hs00193263_m1	1	CHTN	84	T3N1M0	3C	T3N1M0	1		infiltrating ductal carcinoma	8500/3: Infiltrating duct carcinoma, NOS	3	3	Poorly differentiated						19.2547	11.0615	8.19327	8.06282
Jill	10-02-08 Samples 9-12	K5	4061094B24	Invasive Carcinoma	DDOST-Hs00193263_m1	2	CHTN	84	T3N1M0	3C	T3N1M0	1		infiltrating ductal carcinoma	8500/3: Infiltrating duct carcinoma, NOS	3	3	Poorly differentiated						18.9457	11.0615	7.88425
Jill	10-02-08 Samples 9-12	K6	4061094B24	Invasive Carcinoma	DDOST-Hs00193263_m1	3	CHTN	84	T3N1M0	3C	T3N1M0	1		infiltrating ductal carcinoma	8500/3: Infiltrating duct carcinoma, NOS	3	3	Poorly differentiated						19.1724	11.0615	8.11095
Jill	10-02-08 Samples 9-12	O4	4061196A1	Invasive Carcinoma	DDOST-Hs00193263_m1	1	CHTN	75	T2N0M0	2A	T2N0M0	0		infiltrating lobular carcinoma with pleomorphic features and infiltrating ductal carcinoma (small component)	8524/3: Infiltrating lobular mixed with other types of ca.	2	2	Moderately differentiated						21.217	7.20059	14.0164	13.6626
Jill	10-02-08 Samples 9-12	O5	4061196A1	Invasive Carcinoma	DDOST-Hs00193263_m1	2	CHTN	75	T2N0M0	2A	T2N0M0	0		infiltrating lobular carcinoma with pleomorphic features and infiltrating ductal carcinoma (small component)	8524/3: Infiltrating lobular mixed with other types of ca.	2	2	Moderately differentiated						20.9262	7.20059	13.7256
Jill	10-02-08 Samples 9-12	O6	4061196A1	Invasive Carcinoma	DDOST-Hs00193263_m1	3	CHTN	75	T2N0M0	2A	T2N0M0	0		infiltrating lobular carcinoma with pleomorphic features and infiltrating ductal carcinoma (small component)	8524/3: Infiltrating lobular mixed with other types of ca.	2	2	Moderately differentiated						20.4462	7.20059	13.2457
Jill	10-06-08 Samples 13-16-s-08-09	O4	4070249A3	Invasive Carcinoma	DDOST-Hs00193263_m1	1	CHTN	61	T2N0M0	2A	T2N0M0	0		invasive lobular carcinoma, pleomorphic type with signet-ring cell features	8524/3: Infiltrating lobular mixed with other types of ca.	2	1	Well-differentiated						22.2288	11.885	10.3438	10.4812
Jill	10-06-08 Samples 13-16-s-08-09	O5	4070249A3	Invasive Carcinoma	DDOST-Hs00193263_m1	2	CHTN	61	T2N0M0	2A	T2N0M0	0		invasive lobular carcinoma, pleomorphic type with signet-ring cell features	8524/3: Infiltrating lobular mixed with other types of ca.	2	1	Well-differentiated						22.5533	11.885	10.6683
Jill	10-06-08 Samples 13-16-s-08-09	O6	4070249A3	Invasive Carcinoma	DDOST-Hs00193263_m1	3	CHTN	61	T2N0M0	2A	T2N0M0	0		invasive lobular carcinoma, pleomorphic type with signet-ring cell features	8524/3: Infiltrating lobular mixed with other types of ca.	2	1	Well-differentiated						22.3166	11.885	10.4316
RebeccaRepeat	Br 2 LDA 9-28-09 Plate 1	K9	4080633A6	Invasive Carcinoma	DDOST-Hs00193263_m1	1	CHTN	65	T3, N1, M0	3A	T3, N1, M0	1	F	Invasive Ductal Carcinoma	8500/3: Infiltrating duct carcinoma, NOS	3	3	Poorly Differentiated	Frozen& Paraffin					24.3138	10.7268	13.587	13.7628
RebeccaRepeat	Br 2 LDA 9-28-09 Plate 1	K8	4080633A6	Invasive Carcinoma	DDOST-Hs00193263_m1	2	CHTN	65	T3, N1, M0	3A	T3, N1, M0	1	F	Invasive Ductal Carcinoma	8500/3: Infiltrating duct carcinoma, NOS	3	3	Poorly Differentiated	Frozen& Paraffin					24.5326	10.7268	13.8058
RebeccaRepeat	Br 2 LDA 9-28-09 Plate 1	K7	4080633A6	Invasive Carcinoma	DDOST-Hs00193263_m1	3	CHTN	65	T3, N1, M0	3A	T3, N1, M0	1	F	Invasive Ductal Carcinoma	8500/3: Infiltrating duct carcinoma, NOS	3	3	Poorly Differentiated	Frozen& Paraffin					24.6224	10.7268	13.8956
RebeccaLast	Br 2 LDA 1-7-10 Plate 1	K7	T03-104	Invasive Carcinoma	DDOST-Hs00193263_m1	1	WVUTB	Missing	T3N1M0	3A	T3N1M0	1	F	Infiltrating Ductal Carcinoma	8500/3: Infiltrating duct carcinoma, NOS	3	3	Poorly differentiated	Frozen	negative/negative	negative			24.7558	14.5378	10.218	10.1931
RebeccaLast	Br 2 LDA 1-7-10 Plate 1	K8	T03-104	Invasive Carcinoma	DDOST-Hs00193263_m1	2	WVUTB	Missing	T3N1M0	3A	T3N1M0	1	F	Infiltrating Ductal Carcinoma	8500/3: Infiltrating duct carcinoma, NOS	3	3	Poorly differentiated	Frozen	negative/negative	negative			24.717	14.5378	10.1793
RebeccaLast	Br 2 LDA 1-7-10 Plate 1	K9	T03-104	Invasive Carcinoma	DDOST-Hs00193263_m1	3	WVUTB	Missing	T3N1M0	3A	T3N1M0	1	F	Infiltrating Ductal Carcinoma	8500/3: Infiltrating duct carcinoma, NOS	3	3	Poorly differentiated	Frozen	negative/negative	negative			24.7199	14.5378	10.1821
Jill	10-09-08 Samples 50-53s40-44	C4	T033474	Invasive Carcinoma	DDOST-Hs00193263_m1	1	WVUTB	50	I;T1,NO,MO		T1,NO,MO	0		infiltrating ductal carcinoma	8500/3: Infiltrating duct carcinoma, NOS	1	2	Moderately Differentiated						25.3828	8.56206	16.8207	16.8933
Jill	10-09-08 Samples 50-53s40-44	C5	T033474	Invasive Carcinoma	DDOST-Hs00193263_m1	2	WVUTB	50	I;T1,NO,MO		T1,NO,MO	0		infiltrating ductal carcinoma	8500/3: Infiltrating duct carcinoma, NOS	1	2	Moderately Differentiated						25.4209	8.56206	16.8589
Jill	10-09-08 Samples 50-53s40-44	C6	T033474	Invasive Carcinoma	DDOST-Hs00193263_m1	3	WVUTB	50	I;T1,NO,MO		T1,NO,MO	0		infiltrating ductal carcinoma	8500/3: Infiltrating duct carcinoma, NOS	1	2	Moderately Differentiated						25.5622	8.56206	17.0002
Jill	10-09-08 Samples 50-53s40-44	K4	T041014	Invasive Carcinoma	DDOST-Hs00193263_m1	1	WVUTB	66	IIA,T2, N0, M0		T2, N0, M0	0		invasive ductal carcinoma	8500/3: Infiltrating duct carcinoma, NOS	2	3	Poorly differentiated						22.3959	5.78564	16.6103	16.3972
Jill	10-09-08 Samples 50-53s40-44	K5	T041014	Invasive Carcinoma	DDOST-Hs00193263_m1	2	WVUTB	66	IIA,T2, N0, M0		T2, N0, M0	0		invasive ductal carcinoma	8500/3: Infiltrating duct carcinoma, NOS	2	3	Poorly differentiated						22.0644	5.78564	16.2788
Jill	10-09-08 Samples 50-53s40-44	K6	T041014	Invasive Carcinoma	DDOST-Hs00193263_m1	3	WVUTB	66	IIA,T2, N0, M0		T2, N0, M0	0		invasive ductal carcinoma	8500/3: Infiltrating duct carcinoma, NOS	2	3	Poorly differentiated						22.0881	5.78564	16.3024
2 RebeccaRepeat	Br 2 LDA 11-16-09 Plate 1	O8	T04-167-005	Invasive Carcinoma	DDOST-Hs00193263_m1	1	WVUTB	43	T2, N0, M0	2A	T2, N0, M0	0	F	Infiltrating metastatic ductal carcinoma	8500/3: Infiltrating duct carcinoma, NOS	2	3	Poorly differentiated	Frozen	positive/positive	intermediate	Pre menopausal		27.9263	10.7992	17.1271	17.3443
2 RebeccaRepeat	Br 2 LDA 11-16-09 Plate 1	O7	T04-167-005	Invasive Carcinoma	DDOST-Hs00193263_m1	2	WVUTB	43	T2, N0, M0	2A	T2, N0, M0	0	F	Infiltrating metastatic ductal carcinoma	8500/3: Infiltrating duct carcinoma, NOS	2	3	Poorly differentiated	Frozen	positive/positive	intermediate	Pre menopausal		28.1073	10.7992	17.308
2 RebeccaRepeat	Br 2 LDA 11-16-09 Plate 1	O9	T04-167-005	Invasive Carcinoma	DDOST-Hs00193263_m1	3	WVUTB	43	T2, N0, M0	2A	T2, N0, M0	0	F	Infiltrating metastatic ductal carcinoma	8500/3: Infiltrating duct carcinoma, NOS	2	3	Poorly differentiated	Frozen	positive/positive	intermediate	Pre menopausal		28.3972	10.7992	17.5979
Jill	10-09-08 Samples 46-49s37-40	K4	T053774	Invasive Carcinoma	DDOST-Hs00193263_m1	1	WVUTB	59	IIA;T2,N0,M0		T2,N0,M0	0		infiltrating ductal carcinoma	8500/3: Infiltrating duct carcinoma, NOS	2	3	Poorly differentiated						17.4861	5.64001	11.8461	11.5656
Jill	10-09-08 Samples 46-49s37-40	K5	T053774	Invasive Carcinoma	DDOST-Hs00193263_m1	2	WVUTB	59	IIA;T2,N0,M0		T2,N0,M0	0		infiltrating ductal carcinoma	8500/3: Infiltrating duct carcinoma, NOS	2	3	Poorly differentiated						16.6189	5.64001	10.9789
Jill	10-09-08 Samples 46-49s37-40	K6	T053774	Invasive Carcinoma	DDOST-Hs00193263_m1	3	WVUTB	59	IIA;T2,N0,M0		T2,N0,M0	0		infiltrating ductal carcinoma	8500/3: Infiltrating duct carcinoma, NOS	2	3	Poorly differentiated						17.5118	5.64001	11.8718
Jill	10-07-08 Samples 34-37-Maricicas-27-28	C4	T053889	Invasive Carcinoma	DDOST-Hs00193263_m1	1	WVUTB	80	IIA, pT2, pN0, pM0		pT2, pN0, pM0	0		infiltrating ductal adenocarcinoma	8500/3: Infiltrating duct carcinoma, NOS	2	3	Poorly differentiated						20.9906	7.30877	13.6818	14.1613
Jill	10-07-08 Samples 34-37-Maricicas-27-28	C5	T053889	Invasive Carcinoma	DDOST-Hs00193263_m1	2	WVUTB	80	IIA, pT2, pN0, pM0		pT2, pN0, pM0	0		infiltrating ductal adenocarcinoma	8500/3: Infiltrating duct carcinoma, NOS	2	3	Poorly differentiated						21.1471	7.30877	13.8383
Jill	10-07-08 Samples 34-37-Maricicas-27-28	C6	T053889	Invasive Carcinoma	DDOST-Hs00193263_m1	3	WVUTB	80	IIA, pT2, pN0, pM0		pT2, pN0, pM0	0		infiltrating ductal adenocarcinoma	8500/3: Infiltrating duct carcinoma, NOS	2	3	Poorly differentiated						22.2724	7.30877	14.9636
Jill	10-08-08 Samples 38-41s31-32	O4	T0607908	Invasive Carcinoma	DDOST-Hs00193263_m1	1	WVUTB	46	IIA, pT2N0M0		pT2N0M0	0		papillary carcinoma	8050/3: Papillary carcinoma, NOS	2	2	Moderately differentiated						20.4186	6.56973	13.8489	13.5678
Jill	10-08-08 Samples 38-41s31-32	O5	T0607908	Invasive Carcinoma	DDOST-Hs00193263_m1	2	WVUTB	46	IIA, pT2N0M0		pT2N0M0	0		papillary carcinoma	8050/3: Papillary carcinoma, NOS	2	2	Moderately differentiated						20.7854	6.56973	14.2157
Jill	10-08-08 Samples 38-41s31-32	O6	T0607908	Invasive Carcinoma	DDOST-Hs00193263_m1	3	WVUTB	46	IIA, pT2N0M0		pT2N0M0	0		papillary carcinoma	8050/3: Papillary carcinoma, NOS	2	2	Moderately differentiated						19.2084	6.56973	12.6387
Jill	10-08-08 Samples 42-45s32-36	K4	T061324	Invasive Carcinoma	DDOST-Hs00193263_m1	1	WVUTB	55	II, pT2, pN0, pM0		pT2, pN0, pM0	0		invasive ductal adenocarcinoma, mucinous	8500/3: Infiltrating duct carcinoma, NOS	2	3	Poorly Differentiated						19.4335	6.26543	13.1681	13.0352
Jill	10-08-08 Samples 42-45s32-36	K5	T061324	Invasive Carcinoma	DDOST-Hs00193263_m1	2	WVUTB	55	II, pT2, pN0, pM0		pT2, pN0, pM0	0		invasive ductal adenocarcinoma, mucinous	8500/3: Infiltrating duct carcinoma, NOS	2	3	Poorly Differentiated						18.8013	6.26543	12.5358
Jill	10-08-08 Samples 42-45s32-36	K6	T061324	Invasive Carcinoma	DDOST-Hs00193263_m1	3	WVUTB	55	II, pT2, pN0, pM0		pT2, pN0, pM0	0		invasive ductal adenocarcinoma, mucinous	8500/3: Infiltrating duct carcinoma, NOS	2	3	Poorly Differentiated						19.6672	6.26543	13.4017
Jill	10-07-08 Samples 34-37-Maricicas-27-28	K4	T0621513	Invasive Carcinoma	DDOST-Hs00193263_m1	1	WVUTB	86	IIIB, T4, N1, M0		T4, N1, M0	1		mammary carcinoma, predominately mucinous adenocarcinoma with areas of infiltrating ductal carcinoma	8480/3: Mucinous adenocarcinoma	3	3	Poorly differentiated						20.534	7.7534	12.7806	12.6788
Jill	10-07-08 Samples 34-37-Maricicas-27-28	K5	T0621513	Invasive Carcinoma	DDOST-Hs00193263_m1	2	WVUTB	86	IIIB, T4, N1, M0		T4, N1, M0	1		mammary carcinoma, predominately mucinous adenocarcinoma with areas of infiltrating ductal carcinoma	8480/3: Mucinous adenocarcinoma	3	3	Poorly differentiated						20.0541	7.7534	12.3007
Jill	10-07-08 Samples 34-37-Maricicas-27-28	K6	T0621513	Invasive Carcinoma	DDOST-Hs00193263_m1	3	WVUTB	86	IIIB, T4, N1, M0		T4, N1, M0	1		mammary carcinoma, predominately mucinous adenocarcinoma with areas of infiltrating ductal carcinoma	8480/3: Mucinous adenocarcinoma	3	3	Poorly differentiated						20.7084	7.7534	12.955
Jill	10-07-08 Samples 34-37-Maricicas-27-28	O4	T0630919	Invasive Carcinoma	DDOST-Hs00193263_m1	1	WVUTB	58	I, pT1,pN0, pM0		pT1,pN0, pM0	0		invasive ductal carcinoma, mucinous carcinoma	8500/3: Infiltrating duct carcinoma, NOS	1	1	Well-differentiated						21.9759	8.44754	13.5284	13.5088
Jill	10-07-08 Samples 34-37-Maricicas-27-28	O5	T0630919	Invasive Carcinoma	DDOST-Hs00193263_m1	2	WVUTB	58	I, pT1,pN0, pM0		pT1,pN0, pM0	0		invasive ductal carcinoma, mucinous carcinoma	8500/3: Infiltrating duct carcinoma, NOS	1	1	Well-differentiated						22.0886	8.44754	13.6411
Jill	10-07-08 Samples 34-37-Maricicas-27-28	O6	T0630919	Invasive Carcinoma	DDOST-Hs00193263_m1	3	WVUTB	58	I, pT1,pN0, pM0		pT1,pN0, pM0	0		invasive ductal carcinoma, mucinous carcinoma	8500/3: Infiltrating duct carcinoma, NOS	1	1	Well-differentiated						21.8045	8.44754	13.357
RebeccaRepeat	Br 2 LDA 9-28-09 Plate 2	K8	T06-326-013	Invasive Carcinoma	DDOST-Hs00193263_m1	1	WVUTB	44	pT2, pN2a, pMx	3A	pT2, pN2a, pMx	1	F	Invasive ductal carcinoma	8500/3: Infiltrating duct carcinoma, NOS	3	3	Poorly differentiated	Frozen	Positive / Positive	negative			23.6309	9.01661	14.6143	14.7775
RebeccaRepeat	Br 2 LDA 9-28-09 Plate 2	K7	T06-326-013	Invasive Carcinoma	DDOST-Hs00193263_m1	2	WVUTB	44	pT2, pN2a, pMx	3A	pT2, pN2a, pMx	1	F	Invasive ductal carcinoma	8500/3: Infiltrating duct carcinoma, NOS	3	3	Poorly differentiated	Frozen	Positive / Positive	negative			23.8453	9.01661	14.8286
RebeccaRepeat	Br 2 LDA 9-28-09 Plate 2	K9	T06-326-013	Invasive Carcinoma	DDOST-Hs00193263_m1	3	WVUTB	44	pT2, pN2a, pMx	3A	pT2, pN2a, pMx	1	F	Invasive ductal carcinoma	8500/3: Infiltrating duct carcinoma, NOS	3	3	Poorly differentiated	Frozen	Positive / Positive	negative			23.9063	9.01661	14.8897
Jill	10-08-08 Samples 38-41s31-32	C4	T0633206	Invasive Carcinoma	DDOST-Hs00193263_m1	1	WVUTB	50	IIA, pT2, pN0, pM0		pT2, pN0, pM0	0		invasive ductal carcinoma	8500/3: Infiltrating duct carcinoma, NOS	2	1	Well-differentiated						22.0087	8.27849	13.7303	14.1871
Jill	10-08-08 Samples 38-41s31-32	C5	T0633206	Invasive Carcinoma	DDOST-Hs00193263_m1	2	WVUTB	50	IIA, pT2, pN0, pM0		pT2, pN0, pM0	0		invasive ductal carcinoma	8500/3: Infiltrating duct carcinoma, NOS	2	1	Well-differentiated						22.2915	8.27849	14.013
Jill	10-08-08 Samples 38-41s31-32	C6	T0633206	Invasive Carcinoma	DDOST-Hs00193263_m1	3	WVUTB	50	IIA, pT2, pN0, pM0		pT2, pN0, pM0	0		invasive ductal carcinoma	8500/3: Infiltrating duct carcinoma, NOS	2	1	Well-differentiated						23.0965	8.27849	14.818
Jill	10-08-08 Samples 42-45s32-36	C4	T0633418	Invasive Carcinoma	DDOST-Hs00193263_m1	1	WVUTB	50	IIIC, pT1, pN3a, pM0		pT1, pN3a, pM0	1		infiltrating ductal adenocarcinoma	8500/3: Infiltrating duct carcinoma, NOS	3	3	Poorly Differentiated						19.0143	4.40614	14.6081	13.7227
Jill	10-08-08 Samples 42-45s32-36	C5	T0633418	Invasive Carcinoma	DDOST-Hs00193263_m1	2	WVUTB	50	IIIC, pT1, pN3a, pM0		pT1, pN3a, pM0	1		infiltrating ductal adenocarcinoma	8500/3: Infiltrating duct carcinoma, NOS	3	3	Poorly Differentiated						16.1848	4.40614	11.7787
Jill	10-08-08 Samples 42-45s32-36	C6	T0633418	Invasive Carcinoma	DDOST-Hs00193263_m1	3	WVUTB	50	IIIC, pT1, pN3a, pM0		pT1, pN3a, pM0	1		infiltrating ductal adenocarcinoma	8500/3: Infiltrating duct carcinoma, NOS	3	3	Poorly Differentiated						19.1874	4.40614	14.7812
Jill	10-07-08 Samples 26-29s-17-20	C4	T066004	Invasive Carcinoma	DDOST-Hs00193263_m1	1	WVUTB	46	IIA, T2, N1, M0		T2, N1, M0	1		infiltrating ductal carcinoma	8500/3: Infiltrating duct carcinoma, NOS	2	3	Poorly differentiated						23.8397	8.53468	15.305	14.439
Jill	10-07-08 Samples 26-29s-17-20	C5	T066004	Invasive Carcinoma	DDOST-Hs00193263_m1	2	WVUTB	46	IIA, T2, N1, M0		T2, N1, M0	1		infiltrating ductal carcinoma	8500/3: Infiltrating duct carcinoma, NOS	2	3	Poorly differentiated						22.6076	8.53468	14.0729
Jill	10-07-08 Samples 26-29s-17-20	C6	T066004	Invasive Carcinoma	DDOST-Hs00193263_m1	3	WVUTB	46	IIA, T2, N1, M0		T2, N1, M0	1		infiltrating ductal carcinoma	8500/3: Infiltrating duct carcinoma, NOS	2	3	Poorly differentiated						22.4736	8.53468	13.939
Jill	10-07-08 Samples 30-33s-21-24	K4	T069213	Invasive Carcinoma	DDOST-Hs00193263_m1	1	WVUTB	80	1, T1, N0, M0		T1, N0, M0	0		invasive pleomorphic lobular carcinoma	8524/3: Infiltrating lobular mixed with other types of ca.	1	3	Poorly differentiated						22.5389	7.49955	15.0393	15.118
Jill	10-07-08 Samples 30-33s-21-24	K5	T069213	Invasive Carcinoma	DDOST-Hs00193263_m1	2	WVUTB	80	1, T1, N0, M0		T1, N0, M0	0		invasive pleomorphic lobular carcinoma	8524/3: Infiltrating lobular mixed with other types of ca.	1	3	Poorly differentiated						22.6903	7.49955	15.1908
Jill	10-07-08 Samples 30-33s-21-24	K6	T069213	Invasive Carcinoma	DDOST-Hs00193263_m1	3	WVUTB	80	1, T1, N0, M0		T1, N0, M0	0		invasive pleomorphic lobular carcinoma	8524/3: Infiltrating lobular mixed with other types of ca.	1	3	Poorly differentiated						22.6234	7.49955	15.1239
2 RebeccaRepeat	Br 2 LDA 11-10-09 Plate 1	C7	T07-086-004	Invasive Carcinoma	DDOST-Hs00193263_m1	1	WVUTB	45	pT1c, pN0(i-), pM0	1	pT1c, pN0(i-), pM0	0	F	Invasive ductal carcinoma	8500/3: Infiltrating duct carcinoma, NOS	1	3	Poorly differentiated	Frozen	positive / positive	negative			34.9533	28.6578	6.29543	6.83081
2 RebeccaRepeat	Br 2 LDA 11-10-09 Plate 1	C8	T07-086-004	Invasive Carcinoma	DDOST-Hs00193263_m1	2	WVUTB	45	pT1c, pN0(i-), pM0	1	pT1c, pN0(i-), pM0	0	F	Invasive ductal carcinoma	8500/3: Infiltrating duct carcinoma, NOS	1	3	Poorly differentiated	Frozen	positive / positive	negative			35.5292	28.6578	6.87137
2 RebeccaRepeat	Br 2 LDA 11-10-09 Plate 1	C9	T07-086-004	Invasive Carcinoma	DDOST-Hs00193263_m1	3	WVUTB	45	pT1c, pN0(i-), pM0	1	pT1c, pN0(i-), pM0	0	F	Invasive ductal carcinoma	8500/3: Infiltrating duct carcinoma, NOS	1	3	Poorly differentiated	Frozen	positive / positive	negative			35.9835	28.6578	7.32563
Jill	10-09-08 Samples 46-49s37-40	C4	T0714312	Invasive Carcinoma	DDOST-Hs00193263_m1	1	WVUTB	42	IIA;T2,N0,M0		T2,N0,M0	0		recurrent/residual infiltrating ductal adenocarcinoma with an extensive intraductal component	8500/3: Infiltrating duct carcinoma, NOS	2	3	Poorly differentiated						19.8625	6.7503	13.1122	13.0484
Jill	10-09-08 Samples 46-49s37-40	C5	T0714312	Invasive Carcinoma	DDOST-Hs00193263_m1	2	WVUTB	42	IIA;T2,N0,M0		T2,N0,M0	0		recurrent/residual infiltrating ductal adenocarcinoma with an extensive intraductal component	8500/3: Infiltrating duct carcinoma, NOS	2	3	Poorly differentiated						19.7257	6.7503	12.9754
Jill	10-09-08 Samples 46-49s37-40	C6	T0714312	Invasive Carcinoma	DDOST-Hs00193263_m1	3	WVUTB	42	IIA;T2,N0,M0		T2,N0,M0	0		recurrent/residual infiltrating ductal adenocarcinoma with an extensive intraductal component	8500/3: Infiltrating duct carcinoma, NOS	2	3	Poorly differentiated						19.8079	6.7503	13.0576
Jill	10-09-08 Samples 46-49s37-40	O4	T071626	Invasive Carcinoma	DDOST-Hs00193263_m1	1	WVUTB	69	IV, pT3, pN1a, pM0		pT3, pN1a, pM0	1		invasive ductal carcinoma	8500/3: Infiltrating duct carcinoma, NOS	3	3	Poorly differentiated						19.7023	6.71873	12.9836	12.6463
Jill	10-09-08 Samples 46-49s37-40	O5	T071626	Invasive Carcinoma	DDOST-Hs00193263_m1	2	WVUTB	69	IV, pT3, pN1a, pM0		pT3, pN1a, pM0	1		invasive ductal carcinoma	8500/3: Infiltrating duct carcinoma, NOS	3	3	Poorly differentiated						18.6713	6.71873	11.9526
Jill	10-09-08 Samples 46-49s37-40	O6	T071626	Invasive Carcinoma	DDOST-Hs00193263_m1	3	WVUTB	69	IV, pT3, pN1a, pM0		pT3, pN1a, pM0	1		invasive ductal carcinoma	8500/3: Infiltrating duct carcinoma, NOS	3	3	Poorly differentiated						19.7213	6.71873	13.0026
Jill	10-09-08 Samples 50-53s40-44	O4	T0717210	Invasive Carcinoma	DDOST-Hs00193263_m1	1	WVUTB	50	IIIB,pT2, pN2a, pM0		pT2, pN2a, pM0	1		invasive ductal carcinoma	8500/3: Infiltrating duct carcinoma, NOS	3	2	Moderately differentiated						23.0439	7.90212	15.1417	15.2153
Jill	10-09-08 Samples 50-53s40-44	O5	T0717210	Invasive Carcinoma	DDOST-Hs00193263_m1	2	WVUTB	50	IIIB,pT2, pN2a, pM0		pT2, pN2a, pM0	1		invasive ductal carcinoma	8500/3: Infiltrating duct carcinoma, NOS	3	2	Moderately differentiated						23.2597	7.90212	15.3576
Jill	10-09-08 Samples 50-53s40-44	O6	T0717210	Invasive Carcinoma	DDOST-Hs00193263_m1	3	WVUTB	50	IIIB,pT2, pN2a, pM0		pT2, pN2a, pM0	1		invasive ductal carcinoma	8500/3: Infiltrating duct carcinoma, NOS	3	2	Moderately differentiated						23.0486	7.90212	15.1465
Jill	10-07-08 Samples 26-29s-17-20	K4	T071976	Invasive Carcinoma	DDOST-Hs00193263_m1	1	WVUTB	43	IIIA;T3,N1,M0		T3,N1,M0	1		resdiual, invasive infiltrating ductal carcinoma	8500/3: Infiltrating duct carcinoma, NOS	3	3	Poorly differentiated						19.5633	5.98754	13.5757	13.2786
Jill	10-07-08 Samples 26-29s-17-20	K5	T071976	Invasive Carcinoma	DDOST-Hs00193263_m1	2	WVUTB	43	IIIA;T3,N1,M0		T3,N1,M0	1		resdiual, invasive infiltrating ductal carcinoma	8500/3: Infiltrating duct carcinoma, NOS	3	3	Poorly differentiated						18.5819	5.98754	12.5943
Jill	10-07-08 Samples 26-29s-17-20	K6	T071976	Invasive Carcinoma	DDOST-Hs00193263_m1	3	WVUTB	43	IIIA;T3,N1,M0		T3,N1,M0	1		resdiual, invasive infiltrating ductal carcinoma	8500/3: Infiltrating duct carcinoma, NOS	3	3	Poorly differentiated						19.6532	5.98754	13.6657
Jill	10-08-08 Samples 42-45s32-36	O4	T07593	Invasive Carcinoma	DDOST-Hs00193263_m1	1	WVUTB	67	IIB,pT2, pN1b, pM0		pT2, pN1b, pM0	1		invasive ductal carcinoma	8500/3: Infiltrating duct carcinoma, NOS	2	2	Moderately differentiated						20.4275	6.63636	13.7912	13.6223
Jill	10-08-08 Samples 42-45s32-36	O5	T07593	Invasive Carcinoma	DDOST-Hs00193263_m1	2	WVUTB	67	IIB,pT2, pN1b, pM0		pT2, pN1b, pM0	1		invasive ductal carcinoma	8500/3: Infiltrating duct carcinoma, NOS	2	2	Moderately differentiated						20.4597	6.63636	13.8234
Jill	10-08-08 Samples 42-45s32-36	O6	T07593	Invasive Carcinoma	DDOST-Hs00193263_m1	3	WVUTB	67	IIB,pT2, pN1b, pM0		pT2, pN1b, pM0	1		invasive ductal carcinoma	8500/3: Infiltrating duct carcinoma, NOS	2	2	Moderately differentiated						19.8888	6.63636	13.2525
Jill	10-07-08 Samples 30-33s-21-24	G4	T07818	Invasive Carcinoma	DDOST-Hs00193263_m1	1	WVUTB	43	IIB, T2 N1 M0		T2 N1 M0	1		invasive ductal carcinoma	8500/3: Infiltrating duct carcinoma, NOS	2	3	Poorly differentiated						22.6381	9.34579	13.2923	12.3832
Jill	10-07-08 Samples 30-33s-21-24	G5	T07818	Invasive Carcinoma	DDOST-Hs00193263_m1	2	WVUTB	43	IIB, T2 N1 M0		T2 N1 M0	1		invasive ductal carcinoma	8500/3: Infiltrating duct carcinoma, NOS	2	3	Poorly differentiated						21.4833	9.34579	12.1375
Jill	10-07-08 Samples 30-33s-21-24	G6	T07818	Invasive Carcinoma	DDOST-Hs00193263_m1	3	WVUTB	43	IIB, T2 N1 M0		T2 N1 M0	1		invasive ductal carcinoma	8500/3: Infiltrating duct carcinoma, NOS	2	3	Poorly differentiated						21.0656	9.34579	11.7198
RebeccaRepeat	Br 2 LDA 9-25-09 Plate 1	K9	T09-013-004	Invasive Carcinoma	DDOST-Hs00193263_m1	1	WVUTB	68	T1, N0, M0	1	T1, N0, M0	0	F	Invasive ductal carcinoma	8500/3: Infiltrating duct carcinoma, NOS	1	2	Moderately differentiated	Frozen	positive/positive	negative	Post menopausal		24.4717	9.49052	14.9812	15.1199
RebeccaRepeat	Br 2 LDA 9-25-09 Plate 1	K8	T09-013-004	Invasive Carcinoma	DDOST-Hs00193263_m1	2	WVUTB	68	T1, N0, M0	1	T1, N0, M0	0	F	Invasive ductal carcinoma	8500/3: Infiltrating duct carcinoma, NOS	1	2	Moderately differentiated	Frozen	positive/positive	negative	Post menopausal		24.5814	9.49052	15.0909
RebeccaRepeat	Br 2 LDA 9-25-09 Plate 1	K7	T09-013-004	Invasive Carcinoma	DDOST-Hs00193263_m1	3	WVUTB	68	T1, N0, M0	1	T1, N0, M0	0	F	Invasive ductal carcinoma	8500/3: Infiltrating duct carcinoma, NOS	1	2	Moderately differentiated	Frozen	positive/positive	negative	Post menopausal		24.7783	9.49052	15.2878
RebeccaRepeat	Br 2 LDA 9-28-09 Plate 2	G9	T09-023-003	Invasive Carcinoma	DDOST-Hs00193263_m1	1	WVUTB	56	pT1c, pN0(i-), pM0	1	pT1c, pN0(i-), pM0	0	F	Invasive ductal adenocarcinoma	8500/3: Infiltrating duct carcinoma, NOS	1	2	Moderately differentiated	Frozen	positive/positive	positive	Post menopausal		26.5569	11.0381	15.5187	15.619
RebeccaRepeat	Br 2 LDA 9-28-09 Plate 2	G7	T09-023-003	Invasive Carcinoma	DDOST-Hs00193263_m1	2	WVUTB	56	pT1c, pN0(i-), pM0	1	pT1c, pN0(i-), pM0	0	F	Invasive ductal adenocarcinoma	8500/3: Infiltrating duct carcinoma, NOS	1	2	Moderately differentiated	Frozen	positive/positive	positive	Post menopausal		26.574	11.0381	15.5358
RebeccaRepeat	Br 2 LDA 9-28-09 Plate 2	G8	T09-023-003	Invasive Carcinoma	DDOST-Hs00193263_m1	3	WVUTB	56	pT1c, pN0(i-), pM0	1	pT1c, pN0(i-), pM0	0	F	Invasive ductal adenocarcinoma	8500/3: Infiltrating duct carcinoma, NOS	1	2	Moderately differentiated	Frozen	positive/positive	positive	Post menopausal		26.8407	11.0381	15.8025
RebeccaRepeat	Br 2 LDA 9-28-09 Plate 2	O7	T09-034-002	Invasive Carcinoma	DDOST-Hs00193263_m1	1	WVUTB	51	pT1c, pN0, pM0	1	pT1c, pN0, pM0	0	F	Invasive lobular carcinoma	8524/3: Infiltrating lobular mixed with other types of ca.	1	2	Moderately differentiated	Frozen	positive/positive	negative	perimenopausal		26.7046	10.7996	15.9051	16.0098
RebeccaRepeat	Br 2 LDA 9-28-09 Plate 2	O8	T09-034-002	Invasive Carcinoma	DDOST-Hs00193263_m1	2	WVUTB	51	pT1c, pN0, pM0	1	pT1c, pN0, pM0	0	F	Invasive lobular carcinoma	8524/3: Infiltrating lobular mixed with other types of ca.	1	2	Moderately differentiated	Frozen	positive/positive	negative	perimenopausal		26.7523	10.7996	15.9528
RebeccaRepeat	Br 2 LDA 9-28-09 Plate 2	O9	T09-034-002	Invasive Carcinoma	DDOST-Hs00193263_m1	3	WVUTB	51	pT1c, pN0, pM0	1	pT1c, pN0, pM0	0	F	Invasive lobular carcinoma	8524/3: Infiltrating lobular mixed with other types of ca.	1	2	Moderately differentiated	Frozen	positive/positive	negative	perimenopausal		26.9712	10.7996	16.1717
2 RebeccaRepeat	Br 2 LDA 11-16-09 Plate 1	K8	T09-035-001	Invasive Carcinoma	DDOST-Hs00193263_m1	1	WVUTB	78	pT2, pN0(i-), pM0	2A	pT2, pN0(i-), pM0	0	F	Invasive lobular carcinoma	8524/3: Infiltrating lobular mixed with other types of ca.	2	2	Moderately differentiated	Frozen	positive/negative	negative	Post menopausal		34.3209	29.0066	5.31433	5.61325
2 RebeccaRepeat	Br 2 LDA 11-16-09 Plate 1	K9	T09-035-001	Invasive Carcinoma	DDOST-Hs00193263_m1	2	WVUTB	78	pT2, pN0(i-), pM0	2A	pT2, pN0(i-), pM0	0	F	Invasive lobular carcinoma	8524/3: Infiltrating lobular mixed with other types of ca.	2	2	Moderately differentiated	Frozen	positive/negative	negative	Post menopausal		34.55	29.0066	5.54342
2 RebeccaRepeat	Br 2 LDA 11-16-09 Plate 1	K7	T09-035-001	Invasive Carcinoma	DDOST-Hs00193263_m1	3	WVUTB	78	pT2, pN0(i-), pM0	2A	pT2, pN0(i-), pM0	0	F	Invasive lobular carcinoma	8524/3: Infiltrating lobular mixed with other types of ca.	2	2	Moderately differentiated	Frozen	positive/negative	negative	Post menopausal		34.9886	29.0066	5.98199
2 RebeccaRepeat	Br 2 LDA 11-18-09 Plate 2	C7	T09-047-003	Invasive Carcinoma	DDOST-Hs00193263_m1	1	WVUTB	51	pT1c pN0(i-),pM0	1A	pT1c pN0(i-),pM0	0	F	Mucinous carcinoma	8480/3: Mucinous adenocarcinoma	1	2	Moderately differentiated	Frozen	positive/positive	negative			23.578	9.77874	13.7992	13.886
2 RebeccaRepeat	Br 2 LDA 11-18-09 Plate 2	C8	T09-047-003	Invasive Carcinoma	DDOST-Hs00193263_m1	2	WVUTB	51	pT1c pN0(i-),pM0	1A	pT1c pN0(i-),pM0	0	F	Mucinous carcinoma	8480/3: Mucinous adenocarcinoma	1	2	Moderately differentiated	Frozen	positive/positive	negative			23.6522	9.77874	13.8735
2 RebeccaRepeat	Br 2 LDA 11-18-09 Plate 2	C9	T09-047-003	Invasive Carcinoma	DDOST-Hs00193263_m1	3	WVUTB	51	pT1c pN0(i-),pM0	1A	pT1c pN0(i-),pM0	0	F	Mucinous carcinoma	8480/3: Mucinous adenocarcinoma	1	2	Moderately differentiated	Frozen	positive/positive	negative			23.7642	9.77874	13.9854
2 RebeccaRepeat	Br 2 LDA 11-18-09 Plate 2	K7	T09-064-001	Invasive Carcinoma	DDOST-Hs00193263_m1	1	WVUTB	44	pT1c, N1a, M0	2A	pT1c, N1a, M0	1	F	Invasive ductal carcinoma	8500/3: Infiltrating duct carcinoma, NOS	2	2	Moderately differentiated	Frozen	positive/positive	negative	Pre menopausal		24.7711	10.4652	14.3058	14.3642
2 RebeccaRepeat	Br 2 LDA 11-18-09 Plate 2	K8	T09-064-001	Invasive Carcinoma	DDOST-Hs00193263_m1	2	WVUTB	44	pT1c, N1a, M0	2A	pT1c, N1a, M0	1	F	Invasive ductal carcinoma	8500/3: Infiltrating duct carcinoma, NOS	2	2	Moderately differentiated	Frozen	positive/positive	negative	Pre menopausal		24.7782	10.4652	14.3129
2 RebeccaRepeat	Br 2 LDA 11-18-09 Plate 2	K9	T09-064-001	Invasive Carcinoma	DDOST-Hs00193263_m1	3	WVUTB	44	pT1c, N1a, M0	2A	pT1c, N1a, M0	1	F	Invasive ductal carcinoma	8500/3: Infiltrating duct carcinoma, NOS	2	2	Moderately differentiated	Frozen	positive/positive	negative	Pre menopausal		24.9389	10.4652	14.4737
RebeccaRepeat	Br 2 LDA 9-28-09 Plate 1	O7	T09-089-001	Invasive Carcinoma	DDOST-Hs00193263_m1	1	WVUTB	62	pT1c, N0, M0	1A	pT1c, N0, M0	0	F	Residual infiltrating ductal carcinoma	8500/3: Infiltrating duct carcinoma, NOS	1	2	Moderately differentiated	Frozen	positive/negative	positive			25.5721	10.9515	14.6206	14.8004
RebeccaRepeat	Br 2 LDA 9-28-09 Plate 1	O9	T09-089-001	Invasive Carcinoma	DDOST-Hs00193263_m1	2	WVUTB	62	pT1c, N0, M0	1A	pT1c, N0, M0	0	F	Residual infiltrating ductal carcinoma	8500/3: Infiltrating duct carcinoma, NOS	1	2	Moderately differentiated	Frozen	positive/negative	positive			25.7121	10.9515	14.7606
RebeccaRepeat	Br 2 LDA 9-28-09 Plate 1	O8	T09-089-001	Invasive Carcinoma	DDOST-Hs00193263_m1	3	WVUTB	62	pT1c, N0, M0	1A	pT1c, N0, M0	0	F	Residual infiltrating ductal carcinoma	8500/3: Infiltrating duct carcinoma, NOS	1	2	Moderately differentiated	Frozen	positive/negative	positive			25.9716	10.9515	15.0201
Rebecca	Br 2 LDA 12-7-09 Plate 1	K7	T09-122-007	Invasive Carcinoma	DDOST-Hs00193263_m1	1	WVUTB	51	T2,N0,M0	2A	T2,N0,M0	0	F	Infiltrating Ductal Carcinoma	8500/3: Infiltrating duct carcinoma, NOS	2	3	Poorly Differentiated	Frozen	positive/positive	positive			23.3727	9.32693	14.0458	14.0193
Rebecca	Br 2 LDA 12-7-09 Plate 1	K8	T09-122-007	Invasive Carcinoma	DDOST-Hs00193263_m1	2	WVUTB	51	T2,N0,M0	2A	T2,N0,M0	0	F	Infiltrating Ductal Carcinoma	8500/3: Infiltrating duct carcinoma, NOS	2	3	Poorly Differentiated	Frozen	positive/positive	positive			23.3192	9.32693	13.9923
Rebecca	Br 2 LDA 12-7-09 Plate 1	K9	T09-122-007	Invasive Carcinoma	DDOST-Hs00193263_m1	3	WVUTB	51	T2,N0,M0	2A	T2,N0,M0	0	F	Infiltrating Ductal Carcinoma	8500/3: Infiltrating duct carcinoma, NOS	2	3	Poorly Differentiated	Frozen	positive/positive	positive			23.3467	9.32693	14.0198
2 RebeccaRepeat	Br 2 LDA 11-18-09 Plate 2	O8	T09-138-002	Invasive Carcinoma	DDOST-Hs00193263_m1	1	WVUTB	70	T2pN0M0	2A	T2pN0M0	0	F	Infiltrating Ductal Carcinoma	8500/3: Infiltrating duct carcinoma, NOS	2	3	Poorly Differentiated	Frozen	negative/negative	negative	Post menopausal		22.4255	8.82736	13.5981	13.6593
2 RebeccaRepeat	Br 2 LDA 11-18-09 Plate 2	O7	T09-138-002	Invasive Carcinoma	DDOST-Hs00193263_m1	2	WVUTB	70	T2pN0M0	2A	T2pN0M0	0	F	Infiltrating Ductal Carcinoma	8500/3: Infiltrating duct carcinoma, NOS	2	3	Poorly Differentiated	Frozen	negative/negative	negative	Post menopausal		22.4474	8.82736	13.62
2 RebeccaRepeat	Br 2 LDA 11-18-09 Plate 2	O9	T09-138-002	Invasive Carcinoma	DDOST-Hs00193263_m1	3	WVUTB	70	T2pN0M0	2A	T2pN0M0	0	F	Infiltrating Ductal Carcinoma	8500/3: Infiltrating duct carcinoma, NOS	2	3	Poorly Differentiated	Frozen	negative/negative	negative	Post menopausal		22.587	8.82736	13.7596
Rebecca	Br 2 LDA 12-7-09 Plate 1	O7	T09-141-002	Invasive Carcinoma	DDOST-Hs00193263_m1	1	WVUTB	75	pT2pN1aM0	2B	pT2pN1aM0	1	F	Invasive ductal carcinoma	8500/3: Infiltrating duct carcinoma, NOS	2	3	Poorly Differentiated	Frozen	negative/negative	negative	Post menopausal		24.1248	8.92162	15.2032	15.3058
Rebecca	Br 2 LDA 12-7-09 Plate 1	O8	T09-141-002	Invasive Carcinoma	DDOST-Hs00193263_m1	2	WVUTB	75	pT2pN1aM0	2B	pT2pN1aM0	1	F	Invasive ductal carcinoma	8500/3: Infiltrating duct carcinoma, NOS	2	3	Poorly Differentiated	Frozen	negative/negative	negative	Post menopausal		24.2513	8.92162	15.3297
Rebecca	Br 2 LDA 12-7-09 Plate 1	O9	T09-141-002	Invasive Carcinoma	DDOST-Hs00193263_m1	3	WVUTB	75	pT2pN1aM0	2B	pT2pN1aM0	1	F	Invasive ductal carcinoma	8500/3: Infiltrating duct carcinoma, NOS	2	3	Poorly Differentiated	Frozen	negative/negative	negative	Post menopausal		24.3062	8.92162	15.3845
Rebecca	Br 2 LDA 12-7-09 Plate 1	G7	T09-142-003	Invasive Carcinoma	DDOST-Hs00193263_m1	1	WVUTB	37	pT2N3aM0	3C	pT2N3aM0	1	F	Infiltrating Ductal Carcinoma	8500/3: Infiltrating duct carcinoma, NOS	3	3	Poorly Differentiated	Frozen	negative/negative	negative			23.5316	9.15739	14.3742	14.4809
Rebecca	Br 2 LDA 12-7-09 Plate 1	G8	T09-142-003	Invasive Carcinoma	DDOST-Hs00193263_m1	2	WVUTB	37	pT2N3aM0	3C	pT2N3aM0	1	F	Infiltrating Ductal Carcinoma	8500/3: Infiltrating duct carcinoma, NOS	3	3	Poorly Differentiated	Frozen	negative/negative	negative			23.6477	9.15739	14.4904
Rebecca	Br 2 LDA 12-7-09 Plate 1	G9	T09-142-003	Invasive Carcinoma	DDOST-Hs00193263_m1	3	WVUTB	37	pT2N3aM0	3C	pT2N3aM0	1	F	Infiltrating Ductal Carcinoma	8500/3: Infiltrating duct carcinoma, NOS	3	3	Poorly Differentiated	Frozen	negative/negative	negative			23.7356	9.15739	14.5782
Rebecca	Br 2 LDA 12-7-09 Plate 1	C7	T09-150-004	Invasive Carcinoma	DDOST-Hs00193263_m1	1	WVUTB	82	pT2N1aM0	2B	pT2N1aM0	1	F	Invasive Ductal Carcinoma	8500/3: Infiltrating duct carcinoma, NOS	2	2	Moderately Differentiated	Frozen	positive/positive	negative	Post menopausal		24.8467	10.3239	14.5228	14.5703
Rebecca	Br 2 LDA 12-7-09 Plate 1	C8	T09-150-004	Invasive Carcinoma	DDOST-Hs00193263_m1	2	WVUTB	82	pT2N1aM0	2B	pT2N1aM0	1	F	Invasive Ductal Carcinoma	8500/3: Infiltrating duct carcinoma, NOS	2	2	Moderately Differentiated	Frozen	positive/positive	negative	Post menopausal		24.928	10.3239	14.6041
Rebecca	Br 2 LDA 12-7-09 Plate 1	C9	T09-150-004	Invasive Carcinoma	DDOST-Hs00193263_m1	3	WVUTB	82	pT2N1aM0	2B	pT2N1aM0	1	F	Invasive Ductal Carcinoma	8500/3: Infiltrating duct carcinoma, NOS	2	2	Moderately Differentiated	Frozen	positive/positive	negative	Post menopausal		24.9079	10.3239	14.584
RebeccaRepeat	Br 2 LDA 9-25-09 Plate 1	O7	Z3588A1B	Invasive Carcinoma	DDOST-Hs00193263_m1	1	CHTN	NA	pT3, pN1, M1	4	pT3, pN1, M1	1	missing	Invasive Ductal Carcinoma	8500/3: Infiltrating duct carcinoma, NOS	4	3	Poorly Differentiated	Frozen & Paraffin					25.9281	10.0368	15.8913	15.9105
RebeccaRepeat	Br 2 LDA 9-25-09 Plate 1	O9	Z3588A1B	Invasive Carcinoma	DDOST-Hs00193263_m1	2	CHTN	NA	pT3, pN1, M1	4	pT3, pN1, M1	1	missing	Invasive Ductal Carcinoma	8500/3: Infiltrating duct carcinoma, NOS	4	3	Poorly Differentiated	Frozen & Paraffin					25.9299	10.0368	15.893
RebeccaRepeat	Br 2 LDA 9-25-09 Plate 1	O8	Z3588A1B	Invasive Carcinoma	DDOST-Hs00193263_m1	3	CHTN	NA	pT3, pN1, M1	4	pT3, pN1, M1	1	missing	Invasive Ductal Carcinoma	8500/3: Infiltrating duct carcinoma, NOS	4	3	Poorly Differentiated	Frozen & Paraffin					25.9839	10.0368	15.947
2 RebeccaRepeat	Br 2 LDA 11-9-09 Plate 1	G7	Z3740A1A	Invasive Carcinoma	DDOST-Hs00193263_m1	1	CHTN	Missing	T3N0M0	2B	T3N0M0	0	missing	Metaplastic carcinoma with chondrosarcomatous elements	8010/3: Carcinoma, NOS	2	3	Poorly differentiated						26.8339	19.9441	6.88973	6.89794
2 RebeccaRepeat	Br 2 LDA 11-9-09 Plate 1	G8	Z3740A1A	Invasive Carcinoma	DDOST-Hs00193263_m1	2	CHTN	Missing	T3N0M0	2B	T3N0M0	0	missing	Metaplastic carcinoma with chondrosarcomatous elements	8010/3: Carcinoma, NOS	2	3	Poorly differentiated						26.8447	19.9441	6.90061
2 RebeccaRepeat	Br 2 LDA 11-9-09 Plate 1	G9	Z3740A1A	Invasive Carcinoma	DDOST-Hs00193263_m1	3	CHTN	Missing	T3N0M0	2B	T3N0M0	0	missing	Metaplastic carcinoma with chondrosarcomatous elements	8010/3: Carcinoma, NOS	2	3	Poorly differentiated						26.8476	19.9441	6.90347
2 RebeccaRepeat	Br 2 LDA 11-9-09 Plate 1	K8	Z3841A1A	Invasive Carcinoma	DDOST-Hs00193263_m1	1	CHTN	Missing	T2N0M0	2A	T2N0M0	0	missing	Invasive Ductal Carcinoma	8500/3: Infiltrating duct carcinoma, NOS	2	3	Poorly Differentiated	Frozen & Paraffin	ordered	ordered			26.6356	19.6333	7.00228	7.10077
2 RebeccaRepeat	Br 2 LDA 11-9-09 Plate 1	K7	Z3841A1A	Invasive Carcinoma	DDOST-Hs00193263_m1	2	CHTN	Missing	T2N0M0	2A	T2N0M0	0	missing	Invasive Ductal Carcinoma	8500/3: Infiltrating duct carcinoma, NOS	2	3	Poorly Differentiated	Frozen & Paraffin	ordered	ordered			26.7818	19.6333	7.14849
2 RebeccaRepeat	Br 2 LDA 11-9-09 Plate 1	K9	Z3841A1A	Invasive Carcinoma	DDOST-Hs00193263_m1	3	CHTN	Missing	T2N0M0	2A	T2N0M0	0	missing	Invasive Ductal Carcinoma	8500/3: Infiltrating duct carcinoma, NOS	2	3	Poorly Differentiated	Frozen & Paraffin	ordered	ordered			26.7848	19.6333	7.15154
RebeccaLast	Br 2 LDA 1-7-10 Plate 1	C7	Z4142 A1F	Invasive Carcinoma	DDOST-Hs00193263_m1	1	CHTN	NA	T3N1M0	3A	T3N1M0	1	F	Invasive Ductal Carcinoma	8500/3: Infiltrating duct carcinoma, NOS	3	3	Poorly Differentiated	Frozen & Paraffin	positive/positive	positive			26.4554	13.2076	13.2478	13.168
RebeccaLast	Br 2 LDA 1-7-10 Plate 1	C8	Z4142 A1F	Invasive Carcinoma	DDOST-Hs00193263_m1	2	CHTN	NA	T3N1M0	3A	T3N1M0	1	F	Invasive Ductal Carcinoma	8500/3: Infiltrating duct carcinoma, NOS	3	3	Poorly Differentiated	Frozen & Paraffin	positive/positive	positive			26.3936	13.2076	13.186
RebeccaLast	Br 2 LDA 1-7-10 Plate 1	C9	Z4142 A1F	Invasive Carcinoma	DDOST-Hs00193263_m1	3	CHTN	NA	T3N1M0	3A	T3N1M0	1	F	Invasive Ductal Carcinoma	8500/3: Infiltrating duct carcinoma, NOS	3	3	Poorly Differentiated	Frozen & Paraffin	positive/positive	positive			26.2778	13.2076	13.0702
Jill	10-06-08 Samples 22-25Maricicass12-16	K4	1060163B3	normal	DDOST-Hs00193263_m1	1	CHTN	65				normal				normal								22.6582	7.6645	14.9937	14.955	14.767	1.07237
Jill	10-06-08 Samples 22-25Maricicass12-16	K5	1060163B3	normal	DDOST-Hs00193263_m1	2	CHTN	65				normal				normal								22.4743	7.6645	14.8098
Jill	10-06-08 Samples 22-25Maricicass12-16	K6	1060163B3	normal	DDOST-Hs00193263_m1	3	CHTN	65				normal				normal								22.726	7.6645	15.0615
Rebecca	Br 2 LDA 8-27-09 Plate 1	C7	3061119C4	normal	DDOST-Hs00193263_m1	1	CHTN	74				normal	F			normal			Frozen					25.7059	10.5695	15.1364	15.3132
Rebecca	Br 2 LDA 8-27-09 Plate 1	C9	3061119C4	normal	DDOST-Hs00193263_m1	2	CHTN	74				normal	F			normal			Frozen					25.9678	10.5695	15.3983
Rebecca	Br 2 LDA 8-27-09 Plate 1	C8	3061119C4	normal	DDOST-Hs00193263_m1	3	CHTN	74				normal	F			normal			Frozen					25.9745	10.5695	15.4049
Rebecca	Br 2 LDA 8-21-09 Plate 1	G9	3062104B6	normal	DDOST-Hs00193263_m1	1	CHTN	52				normal	F			normal								24.2679	9.61416	14.6537	14.7112
Rebecca	Br 2 LDA 8-21-09 Plate 1	G8	3062104B6	normal	DDOST-Hs00193263_m1	2	CHTN	52				normal	F			normal								24.3524	9.61416	14.7383
Rebecca	Br 2 LDA 8-21-09 Plate 1	G7	3062104B6	normal	DDOST-Hs00193263_m1	3	CHTN	52				normal	F			normal								24.3557	9.61416	14.7416
Rebecca	Br 2 LDA 8-25-09 Plate 1	K7	4060634B10	normal	DDOST-Hs00193263_m1	1	CHTN	79				normal	F			normal			Frozen					25.7676	10.8951	14.8724	14.984
Rebecca	Br 2 LDA 8-25-09 Plate 1	K8	4060634B10	normal	DDOST-Hs00193263_m1	2	CHTN	79				normal	F			normal			Frozen					25.8912	10.8951	14.9961
Rebecca	Br 2 LDA 8-25-09 Plate 1	K9	4060634B10	normal	DDOST-Hs00193263_m1	3	CHTN	79				normal	F			normal			Frozen					25.9785	10.8951	15.0834
Rebecca	Br 2 LDA 8-25-09 Plate 1	C7	T07-081-003	normal	DDOST-Hs00193263_m1	1	WVUTB	40				normal	F			normal								25.8701	10.489	15.3811	15.5592
Rebecca	Br 2 LDA 8-25-09 Plate 1	C8	T07-081-003	normal	DDOST-Hs00193263_m1	2	WVUTB	40				normal	F			normal								26.0918	10.489	15.6028
Rebecca	Br 2 LDA 8-25-09 Plate 1	C9	T07-081-003	normal	DDOST-Hs00193263_m1	3	WVUTB	40				normal	F			normal								26.1825	10.489	15.6935
Rebecca	Br 2 LDA 8-25-09 Plate 1	G9	T07-197-003	normal	DDOST-Hs00193263_m1	1	WVUTB	43				normal	F			normal			Frozen					25.3719	10.9588	14.4131	14.599
Rebecca	Br 2 LDA 8-25-09 Plate 1	G7	T07-197-003	normal	DDOST-Hs00193263_m1	2	WVUTB	43				normal	F			normal			Frozen					25.6281	10.9588	14.6692
Rebecca	Br 2 LDA 8-25-09 Plate 1	G8	T07-197-003	normal	DDOST-Hs00193263_m1	3	WVUTB	43				normal	F			normal			Frozen					25.6736	10.9588	14.7147
Rebecca	Br 2 LDA 8-27-09 Plate 1	K8	T09-045-001	normal	DDOST-Hs00193263_m1	1	WVUTB	39				normal	F			normal			Frozen					24.1276	8.89414	15.2334	15.4202
Rebecca	Br 2 LDA 8-27-09 Plate 1	K9	T09-045-001	normal	DDOST-Hs00193263_m1	2	WVUTB	39				normal	F			normal			Frozen					24.3927	8.89414	15.4986
Rebecca	Br 2 LDA 8-27-09 Plate 1	K7	T09-045-001	normal	DDOST-Hs00193263_m1	3	WVUTB	39				normal	F			normal			Frozen					24.4229	8.89414	15.5287
Rebecca	Br 2 LDA 8-27-09 Plate 1	O9	T09-047-002	normal	DDOST-Hs00193263_m1	1	WVUTB	51				normal	F			normal			Frozen					25.1088	9.98865	15.1202	15.2591
Rebecca	Br 2 LDA 8-27-09 Plate 1	O7	T09-047-002	normal	DDOST-Hs00193263_m1	2	WVUTB	51				normal	F			normal			Frozen					25.1723	9.98865	15.1837
Rebecca	Br 2 LDA 8-27-09 Plate 1	O8	T09-047-002	normal	DDOST-Hs00193263_m1	3	WVUTB	51				normal	F			normal			Frozen					25.4621	9.98865	15.4735
Rebecca	Br 2 LDA 8-27-09 Plate 1	G9	T09-064-003	normal	DDOST-Hs00193263_m1	1	WVUTB	44				normal	F			normal			Frozen					24.9762	9.73424	15.2419	15.3234
Rebecca	Br 2 LDA 8-27-09 Plate 1	G7	T09-064-003	normal	DDOST-Hs00193263_m1	2	WVUTB	44				normal	F			normal			Frozen					25.0934	9.73424	15.3592
Rebecca	Br 2 LDA 8-27-09 Plate 1	G8	T09-064-003	normal	DDOST-Hs00193263_m1	3	WVUTB	44				normal	F			normal			Frozen					25.1034	9.73424	15.3692
Rebecca	Br 2 LDA 12-8-09 Plate 1	O7	T09-089-002	normal	DDOST-Hs00193263_m1	1	WVUTB	62				normal				normal			Frozen					25.8028	12.8687	12.9341	12.9074
Rebecca	Br 2 LDA 12-8-09 Plate 1	O8	T09-089-002	normal	DDOST-Hs00193263_m1	2	WVUTB	62				normal				normal			Frozen					25.6669	12.8687	12.7982
Rebecca	Br 2 LDA 12-8-09 Plate 1	O9	T09-089-002	normal	DDOST-Hs00193263_m1	3	WVUTB	62				normal				normal			Frozen					25.8587	12.8687	12.99
Rebecca	Br 2 LDA 12-8-09 Plate 1	C7	T09-122-002	normal	DDOST-Hs00193263_m1	1	WVUTB	51				normal				normal			Frozen					23.5678	11.4183	12.1494	12.3189
Rebecca	Br 2 LDA 12-8-09 Plate 1	C8	T09-122-002	normal	DDOST-Hs00193263_m1	2	WVUTB	51				normal				normal			Frozen					23.7476	11.4183	12.3292
Rebecca	Br 2 LDA 12-8-09 Plate 1	C9	T09-122-002	normal	DDOST-Hs00193263_m1	3	WVUTB	51				normal				normal			Frozen					23.8963	11.4183	12.4779
Rebecca	Br 2 LDA 8-24-09 Plate 1	O7	Z3841A2A	normal	DDOST-Hs00193263_m1	1	CHTN	Missing				normal	missing			normal			Frozen & Paraffin					25.636	9.94032	15.6957	15.8534
Rebecca	Br 2 LDA 8-24-09 Plate 1	O9	Z3841A2A	normal	DDOST-Hs00193263_m1	2	CHTN	Missing				normal	missing			normal			Frozen & Paraffin					25.7498	9.94032	15.8094
Rebecca	Br 2 LDA 8-24-09 Plate 1	O8	Z3841A2A	normal	DDOST-Hs00193263_m1	3	CHTN	Missing				normal	missing			normal			Frozen & Paraffin					25.9953	9.94032	16.055
2 RebeccaRepeat	Br 2 LDA 11-10-09 Plate 1	O7	1082304A4	Sarcoma	DDOST-Hs00193263_m1	1	CHTN	79	T4, N0,M0	3B	T4, N0,M0	0	F	Spindle Cell Sarcoma	8801/3: Spindle cell sarcoma	3	2	Moderately Differentiated		negative/negative	negative			24.3521	5.72147	18.6306	18.7363	17.0778	2.34551	0.201549	0.390322
2 RebeccaRepeat	Br 2 LDA 11-10-09 Plate 1	O9	1082304A4	Sarcoma	DDOST-Hs00193263_m1	2	CHTN	79	T4, N0,M0	3B	T4, N0,M0	0	F	Spindle Cell Sarcoma	8801/3: Spindle cell sarcoma	3	2	Moderately Differentiated		negative/negative	negative			24.508	5.72147	18.7865
2 RebeccaRepeat	Br 2 LDA 11-10-09 Plate 1	O8	1082304A4	Sarcoma	DDOST-Hs00193263_m1	3	CHTN	79	T4, N0,M0	3B	T4, N0,M0	0	F	Spindle Cell Sarcoma	8801/3: Spindle cell sarcoma	3	2	Moderately Differentiated		negative/negative	negative			24.5133	5.72147	18.7918
RebeccaRepeat	Br 2 LDA 9-29-09 Plate 1	G9	T04-104-006	Sarcoma	DDOST-Hs00193263_m1	1	WVUTB	56	T4, N0, M0	1	T4, N0, M0	0	F	Recurrent Cystosarcoma Phyllodes		1	N/A	N/A	Frozen					25.4754	10.2202	15.2552	15.4193
RebeccaRepeat	Br 2 LDA 9-29-09 Plate 1	G7	T04-104-006	Sarcoma	DDOST-Hs00193263_m1	2	WVUTB	56	T4, N0, M0	1	T4, N0, M0	0	F	Recurrent Cystosarcoma Phyllodes		1	N/A	N/A	Frozen					25.6621	10.2202	15.4419
RebeccaRepeat	Br 2 LDA 9-29-09 Plate 1	G8	T04-104-006	Sarcoma	DDOST-Hs00193263_m1	3	WVUTB	56	T4, N0, M0	1	T4, N0, M0	0	F	Recurrent Cystosarcoma Phyllodes		1	N/A	N/A	Frozen					25.7809	10.2202	15.5607
Jill	10-09-08 Samples 50-53s40-44	G13	T0426310	DCIS	FAT-Hs00170627_m1	1	WVUTB	63		0		0		DCIS		0	3	Poorly differentiated						25.2981	8.64477	16.6533	16.6908	15.3764	1.15304	0.799912	0.692048
Jill	10-09-08 Samples 50-53s40-44	G14	T0426310	DCIS	FAT-Hs00170627_m1	2	WVUTB	63		0		0		DCIS		0	3	Poorly differentiated						25.3926	8.64477	16.7478
Jill	10-09-08 Samples 50-53s40-44	G15	T0426310	DCIS	FAT-Hs00170627_m1	3	WVUTB	63		0		0		DCIS		0	3	Poorly differentiated						25.3161	8.64477	16.6713
Jill	10-07-08 Samples 26-29s-17-20	G15	T06449	DCIS	FAT-Hs00170627_m1	1	WVUTB	56		0		0		DCIS		0	3	Poorly differentiated						23.2085	8.26771	14.9408	14.9026
Jill	10-07-08 Samples 26-29s-17-20	G14	T06449	DCIS	FAT-Hs00170627_m1	2	WVUTB	56		0		0		DCIS		0	3	Poorly differentiated						23.1886	8.26771	14.9209
Jill	10-07-08 Samples 26-29s-17-20	G13	T06449	DCIS	FAT-Hs00170627_m1	3	WVUTB	56		0		0		DCIS		0	3	Poorly differentiated						23.1139	8.26771	14.8462
2 RebeccaRepeat	Br 2 LDA 11-18-09 Plate 2	G18	T09-045-003	DCIS	FAT-Hs00170627_m1	1	WVUTB	39	pTis, pN1mi, pMx	0	pTis, pN1mi, pMx	0	F	DCIS		0	1	Well-Differentiated	Frozen	negative / negative	not addressed			25.059	10.5131	14.5459	14.5357
2 RebeccaRepeat	Br 2 LDA 11-18-09 Plate 2	G17	T09-045-003	DCIS	FAT-Hs00170627_m1	2	WVUTB	39	pTis, pN1mi, pMx	0	pTis, pN1mi, pMx	0	F	DCIS		0	1	Well-Differentiated	Frozen	negative / negative	not addressed			25.1138	10.5131	14.6007
2 RebeccaRepeat	Br 2 LDA 11-18-09 Plate 2	G16	T09-045-003	DCIS	FAT-Hs00170627_m1	3	WVUTB	39	pTis, pN1mi, pMx	0	pTis, pN1mi, pMx	0	F	DCIS		0	1	Well-Differentiated	Frozen	negative / negative	not addressed			24.9734	10.5131	14.4603
Jill	10-02-08 Samples 9-12	C13	1060163A9	Invasive Carcinoma	FAT-Hs00170627_m1	1	CHTN	65	T2N0M0	2A	T2N0M0	0		invasive ductal carcinoma	8500/3: Infiltrating duct carcinoma, NOS	2	3	Poorly differentiated		negative/negative	intermediate: test to be repeated	Postmenopausal		23.6518	9.98487	13.6669	13.4728	15.36	3.1228	0.809038	0.554288
Jill	10-02-08 Samples 9-12	C14	1060163A9	Invasive Carcinoma	FAT-Hs00170627_m1	2	CHTN	65	T2N0M0	2A	T2N0M0	0		invasive ductal carcinoma	8500/3: Infiltrating duct carcinoma, NOS	2	3	Poorly differentiated		negative/negative	intermediate: test to be repeated	Postmenopausal		23.1846	9.98487	13.1997
Jill	10-02-08 Samples 9-12	C15	1060163A9	Invasive Carcinoma	FAT-Hs00170627_m1	3	CHTN	65	T2N0M0	2A	T2N0M0	0		invasive ductal carcinoma	8500/3: Infiltrating duct carcinoma, NOS	2	3	Poorly differentiated		negative/negative	intermediate: test to be repeated	Postmenopausal		23.5366	9.98487	13.5517
RebeccaRepeat	Br 2 LDA 9-29-09 Plate 1	C16	1060568A18	Invasive Carcinoma	FAT-Hs00170627_m1	1	CHTN	50	T4, N1, M0	3B	T4, N1, M0	1	F	Invasive ductal carcinoma	8500/3: Infiltrating duct carcinoma, NOS	3	3	Poorly differentiated		positive/negative	negative			25.9784	10.3972	15.5812	15.5624
RebeccaRepeat	Br 2 LDA 9-29-09 Plate 1	C17	1060568A18	Invasive Carcinoma	FAT-Hs00170627_m1	2	CHTN	50	T4, N1, M0	3B	T4, N1, M0	1	F	Invasive ductal carcinoma	8500/3: Infiltrating duct carcinoma, NOS	3	3	Poorly differentiated		positive/negative	negative			25.9418	10.3972	15.5447
RebeccaRepeat	Br 2 LDA 9-29-09 Plate 1	C18	1060568A18	Invasive Carcinoma	FAT-Hs00170627_m1	3	CHTN	50	T4, N1, M0	3B	T4, N1, M0	1	F	Invasive ductal carcinoma	8500/3: Infiltrating duct carcinoma, NOS	3	3	Poorly differentiated		positive/negative	negative			25.9585	10.3972	15.5613
Jill	10-06-08 Samples 18-21s-09-12	C13	1060950A1	Invasive Carcinoma	FAT-Hs00170627_m1	1	CHTN	63	T1cN0M0	1A	T1cN0M0	0		infiltrating ductal carcinoma, cribriform subtype	8500/3: Infiltrating duct carcinoma, NOS	1	1	Well-differentiated		positive/positive	negative			24.1886	6.92383	17.2648	17.2833
Jill	10-06-08 Samples 18-21s-09-12	C14	1060950A1	Invasive Carcinoma	FAT-Hs00170627_m1	2	CHTN	63	T1cN0M0	1A	T1cN0M0	0		infiltrating ductal carcinoma, cribriform subtype	8500/3: Infiltrating duct carcinoma, NOS	1	1	Well-differentiated		positive/positive	negative			24.152	6.92383	17.2282
Jill	10-06-08 Samples 18-21s-09-12	C15	1060950A1	Invasive Carcinoma	FAT-Hs00170627_m1	3	CHTN	63	T1cN0M0	1A	T1cN0M0	0		infiltrating ductal carcinoma, cribriform subtype	8500/3: Infiltrating duct carcinoma, NOS	1	1	Well-differentiated		positive/positive	negative			24.2806	6.92383	17.3568
Jill	10-06-08 Samples 13-16-s-08-09	C14	1061053A1	Invasive Carcinoma	FAT-Hs00170627_m1	1	CHTN	36	T3N1aM0	3A	T3N1aM0	1		infiltrating ductal carcinoma	8500/3: Infiltrating duct carcinoma, NOS	3	2	Moderately differentiated		positive/positive	(+1) probably negative	Premenopausal		21.8215	6.34086	15.4807	15.5044
Jill	10-06-08 Samples 13-16-s-08-09	C13	1061053A1	Invasive Carcinoma	FAT-Hs00170627_m1	2	CHTN	36	T3N1aM0	3A	T3N1aM0	1		infiltrating ductal carcinoma	8500/3: Infiltrating duct carcinoma, NOS	3	2	Moderately differentiated		positive/positive	(+1) probably negative	Premenopausal		21.7767	6.34086	15.4358
Jill	10-06-08 Samples 13-16-s-08-09	C15	1061053A1	Invasive Carcinoma	FAT-Hs00170627_m1	3	CHTN	36	T3N1aM0	3A	T3N1aM0	1		infiltrating ductal carcinoma	8500/3: Infiltrating duct carcinoma, NOS	3	2	Moderately differentiated		positive/positive	(+1) probably negative	Premenopausal		21.9376	6.34086	15.5967
RebeccaRepeat	Br 2 LDA 9-28-09 Plate 1	C17	1061562A15	Invasive Carcinoma	FAT-Hs00170627_m1	1	CHTN	60	T2, N0, M0	2A	T2, N0, M0	0	F	Mucinous Adenocarcinoma	8480/3: Mucinous adenocarcinoma	2	1	Well-Differentiated	Frozen & Paraffin	positive/positive	negative			24.9493	9.96153	14.9878	14.9475
RebeccaRepeat	Br 2 LDA 9-28-09 Plate 1	C16	1061562A15	Invasive Carcinoma	FAT-Hs00170627_m1	2	CHTN	60	T2, N0, M0	2A	T2, N0, M0	0	F	Mucinous Adenocarcinoma	8480/3: Mucinous adenocarcinoma	2	1	Well-Differentiated	Frozen & Paraffin	positive/positive	negative			24.8472	9.96153	14.8857
RebeccaRepeat	Br 2 LDA 9-28-09 Plate 1	C18	1061562A15	Invasive Carcinoma	FAT-Hs00170627_m1	3	CHTN	60	T2, N0, M0	2A	T2, N0, M0	0	F	Mucinous Adenocarcinoma	8480/3: Mucinous adenocarcinoma	2	1	Well-Differentiated	Frozen & Paraffin	positive/positive	negative			24.9307	9.96153	14.9692
Jill	10-06-08 Samples 18-21s-09-12	O14	1061897A3	Invasive Carcinoma	FAT-Hs00170627_m1	1	CHTN	85	T2N2aM0	3A	T2N2aM0	1		invasive lobular carcinoma	8524/3: Infiltrating lobular mixed with other types of ca.	3	1	Well-differentiated		positive/positive	negative	Postmenopausal		26.3838	7.70997	18.6738	18.8539
Jill	10-06-08 Samples 18-21s-09-12	O13	1061897A3	Invasive Carcinoma	FAT-Hs00170627_m1	2	CHTN	85	T2N2aM0	3A	T2N2aM0	1		invasive lobular carcinoma	8524/3: Infiltrating lobular mixed with other types of ca.	3	1	Well-differentiated		positive/positive	negative	Postmenopausal		26.7049	7.70997	18.9949
Jill	10-06-08 Samples 18-21s-09-12	O15	1061897A3	Invasive Carcinoma	FAT-Hs00170627_m1	3	CHTN	85	T2N2aM0	3A	T2N2aM0	1		invasive lobular carcinoma	8524/3: Infiltrating lobular mixed with other types of ca.	3	1	Well-differentiated		positive/positive	negative	Postmenopausal		26.6029	7.70997	18.8929
RebeccaRepeat	Br 2 LDA 9-28-09 Plate 2	C16	1062323A6	Invasive Carcinoma	FAT-Hs00170627_m1	1	CHTN	62	T2N0M0	2A	T2N0M0	0	F	Infiltrating Ductal Carcinoma	8500/3: Infiltrating duct carcinoma, NOS	2	3	Poorly Differentiated	Frozen & Paraffin	negative/negative	negative			26.9805	8.83488	18.1456	18.2874
RebeccaRepeat	Br 2 LDA 9-28-09 Plate 2	C18	1062323A6	Invasive Carcinoma	FAT-Hs00170627_m1	2	CHTN	62	T2N0M0	2A	T2N0M0	0	F	Infiltrating Ductal Carcinoma	8500/3: Infiltrating duct carcinoma, NOS	2	3	Poorly Differentiated	Frozen & Paraffin	negative/negative	negative			27.2367	8.83488	18.4018
RebeccaRepeat	Br 2 LDA 9-28-09 Plate 2	C17	1062323A6	Invasive Carcinoma	FAT-Hs00170627_m1	3	CHTN	62	T2N0M0	2A	T2N0M0	0	F	Infiltrating Ductal Carcinoma	8500/3: Infiltrating duct carcinoma, NOS	2	3	Poorly Differentiated	Frozen & Paraffin	negative/negative	negative			27.1496	8.83488	18.3147
RebeccaRepeat	Br 2 LDA 9-28-09 Plate 1	G16	1070062A1	Invasive Carcinoma	FAT-Hs00170627_m1	1	CHTN	49	T2N0M0	2A	T2N0M0	0	F	Ductal Adenocarcinoma	8500/3: Infiltrating duct carcinoma, NOS	2	3	Poorly differentiated		positive/positive	negative			25.5498	9.88308	15.6667	15.6987
RebeccaRepeat	Br 2 LDA 9-28-09 Plate 1	G17	1070062A1	Invasive Carcinoma	FAT-Hs00170627_m1	2	CHTN	49	T2N0M0	2A	T2N0M0	0	F	Ductal Adenocarcinoma	8500/3: Infiltrating duct carcinoma, NOS	2	3	Poorly differentiated		positive/positive	negative			25.5615	9.88308	15.6784
RebeccaRepeat	Br 2 LDA 9-28-09 Plate 1	G18	1070062A1	Invasive Carcinoma	FAT-Hs00170627_m1	3	CHTN	49	T2N0M0	2A	T2N0M0	0	F	Ductal Adenocarcinoma	8500/3: Infiltrating duct carcinoma, NOS	2	3	Poorly differentiated		positive/positive	negative			25.6341	9.88308	15.751
Jill	10-06-08 Samples 22-25Maricicass12-16	O13	1070512A1	Invasive Carcinoma	FAT-Hs00170627_m1	1	CHTN	80	T1cN0M0	1A	T1cN0M0	0		invasive ductal carcinoma	8500/3: Infiltrating duct carcinoma, NOS	1	2	Moderately differentiated		positive/positive	negative			24.6972	6.83775	17.8594	17.8252
Jill	10-06-08 Samples 22-25Maricicass12-16	O14	1070512A1	Invasive Carcinoma	FAT-Hs00170627_m1	2	CHTN	80	T1cN0M0	1A	T1cN0M0	0		invasive ductal carcinoma	8500/3: Infiltrating duct carcinoma, NOS	1	2	Moderately differentiated		positive/positive	negative			24.6341	6.83775	17.7964
Jill	10-06-08 Samples 22-25Maricicass12-16	O15	1070512A1	Invasive Carcinoma	FAT-Hs00170627_m1	3	CHTN	80	T1cN0M0	1A	T1cN0M0	0		invasive ductal carcinoma	8500/3: Infiltrating duct carcinoma, NOS	1	2	Moderately differentiated		positive/positive	negative			24.6576	6.83775	17.8199
2 RebeccaRepeat	Br 2 LDA 11-18-09 Plate 1	O16	1072014A5	Invasive Carcinoma	FAT-Hs00170627_m1	1	CHTN	49	T3N0M0	2B	T3N0M0	0	F	Invasive ductal carcinoma	8500/3: Infiltrating duct carcinoma, NOS	2	3	Poorly differentiated		positive/positive	positive			24.9531	5.80943	19.1437	19.1322
2 RebeccaRepeat	Br 2 LDA 11-18-09 Plate 1	O17	1072014A5	Invasive Carcinoma	FAT-Hs00170627_m1	2	CHTN	49	T3N0M0	2B	T3N0M0	0	F	Invasive ductal carcinoma	8500/3: Infiltrating duct carcinoma, NOS	2	3	Poorly differentiated		positive/positive	positive			24.9138	5.80943	19.1044
2 RebeccaRepeat	Br 2 LDA 11-18-09 Plate 1	O18	1072014A5	Invasive Carcinoma	FAT-Hs00170627_m1	3	CHTN	49	T3N0M0	2B	T3N0M0	0	F	Invasive ductal carcinoma	8500/3: Infiltrating duct carcinoma, NOS	2	3	Poorly differentiated		positive/positive	positive			24.9579	5.80943	19.1484
RebeccaRepeat	Br 2 LDA 9-25-09 Plate 1	C16	1080312A4	Invasive Carcinoma	FAT-Hs00170627_m1	1	CHTN	71	T2N1M0	2B	T2N1M0	1	F	Invasive Ductal Carcinoma	8500/3: Infiltrating duct carcinoma, NOS	2	2	Moderately differentiated	Frozen& Paraffin	positive/positive	negative			26.5853	10.076	16.5093	16.4757
RebeccaRepeat	Br 2 LDA 9-25-09 Plate 1	C18	1080312A4	Invasive Carcinoma	FAT-Hs00170627_m1	2	CHTN	71	T2N1M0	2B	T2N1M0	1	F	Invasive Ductal Carcinoma	8500/3: Infiltrating duct carcinoma, NOS	2	2	Moderately differentiated	Frozen& Paraffin	positive/positive	negative			26.5178	10.076	16.4418
RebeccaRepeat	Br 2 LDA 9-25-09 Plate 1	C17	1080312A4	Invasive Carcinoma	FAT-Hs00170627_m1	3	CHTN	71	T2N1M0	2B	T2N1M0	1	F	Invasive Ductal Carcinoma	8500/3: Infiltrating duct carcinoma, NOS	2	2	Moderately differentiated	Frozen& Paraffin	positive/positive	negative			26.552	10.076	16.476
2 RebeccaRepeat	Br 2 LDA 10-26-09 Plate 2 mirVana	G17	1080502A1	Invasive Carcinoma	FAT-Hs00170627_m1	1	CHTN	42	T2N0M0	2A	T2N0M0	0	F	Invasive Ductal Carcinoma	8500/3: Infiltrating duct carcinoma, NOS	2	3	Poorly differentiated	Frozen& Paraffin	pending	pending			27.6204	14.3589	13.2615	13.3609
2 RebeccaRepeat	Br 2 LDA 10-26-09 Plate 2 mirVana	G16	1080502A1	Invasive Carcinoma	FAT-Hs00170627_m1	2	CHTN	42	T2N0M0	2A	T2N0M0	0	F	Invasive Ductal Carcinoma	8500/3: Infiltrating duct carcinoma, NOS	2	3	Poorly differentiated	Frozen& Paraffin	pending	pending			27.7528	14.3589	13.3939
2 RebeccaRepeat	Br 2 LDA 10-26-09 Plate 2 mirVana	G18	1080502A1	Invasive Carcinoma	FAT-Hs00170627_m1	3	CHTN	42	T2N0M0	2A	T2N0M0	0	F	Invasive Ductal Carcinoma	8500/3: Infiltrating duct carcinoma, NOS	2	3	Poorly differentiated	Frozen& Paraffin	pending	pending			27.7862	14.3589	13.4273
2 RebeccaRepeat	Br 2 LDA 10-26-09 Plate 2 mirVana	C17	1080719B5	Invasive Carcinoma	FAT-Hs00170627_m1	1	CHTN	64	T3N0M0	2B	T3N0M0	0	F	Invasive Ductal Carcinoma	8500/3: Infiltrating duct carcinoma, NOS	2	3	Poorly Differentiated	Frozen & Paraffin	ordered	ordered			25.9038	16.0027	9.90109	9.94939
2 RebeccaRepeat	Br 2 LDA 10-26-09 Plate 2 mirVana	C16	1080719B5	Invasive Carcinoma	FAT-Hs00170627_m1	2	CHTN	64	T3N0M0	2B	T3N0M0	0	F	Invasive Ductal Carcinoma	8500/3: Infiltrating duct carcinoma, NOS	2	3	Poorly Differentiated	Frozen & Paraffin	ordered	ordered			25.9418	16.0027	9.93912
2 RebeccaRepeat	Br 2 LDA 10-26-09 Plate 2 mirVana	C18	1080719B5	Invasive Carcinoma	FAT-Hs00170627_m1	3	CHTN	64	T3N0M0	2B	T3N0M0	0	F	Invasive Ductal Carcinoma	8500/3: Infiltrating duct carcinoma, NOS	2	3	Poorly Differentiated	Frozen & Paraffin	ordered	ordered			26.0106	16.0027	10.0079
2 RebeccaRepeat	Br 2 LDA 10-26-09 Plate 2 mirVana	K17	1081454A6	Invasive Carcinoma	FAT-Hs00170627_m1	1	CHTN	51	T2N0M0	2A	T2N0M0	0	M	Invasive Ductal Carcinoma	8500/3: Infiltrating duct carcinoma, NOS	2	3	Poorly Differentiated	Frozen & Paraffin	positive / negative	negative			26.6377	13.9592	12.6785	12.7708
2 RebeccaRepeat	Br 2 LDA 10-26-09 Plate 2 mirVana	K16	1081454A6	Invasive Carcinoma	FAT-Hs00170627_m1	2	CHTN	51	T2N0M0	2A	T2N0M0	0	M	Invasive Ductal Carcinoma	8500/3: Infiltrating duct carcinoma, NOS	2	3	Poorly Differentiated	Frozen & Paraffin	positive / negative	negative			26.7708	13.9592	12.8115
2 RebeccaRepeat	Br 2 LDA 10-26-09 Plate 2 mirVana	K18	1081454A6	Invasive Carcinoma	FAT-Hs00170627_m1	3	CHTN	51	T2N0M0	2A	T2N0M0	0	M	Invasive Ductal Carcinoma	8500/3: Infiltrating duct carcinoma, NOS	2	3	Poorly Differentiated	Frozen & Paraffin	positive / negative	negative			26.7817	13.9592	12.8224
Jill	10-06-08 Samples 18-21s-09-12	G13	3061119A4	Invasive Carcinoma	FAT-Hs00170627_m1	1	CHTN	74	T2N0M0	2A	T2N0M0	0		infiltrating ductal carcinoma with mucinous differentiation	8523/3: Infiltrating duct mixed with other types of ca.	2	1	Well-differentiated						22.7008	8.0076	14.6932	14.8556
Jill	10-06-08 Samples 18-21s-09-12	G15	3061119A4	Invasive Carcinoma	FAT-Hs00170627_m1	2	CHTN	74	T2N0M0	2A	T2N0M0	0		infiltrating ductal carcinoma with mucinous differentiation	8523/3: Infiltrating duct mixed with other types of ca.	2	1	Well-differentiated						22.9324	8.0076	14.9248
Jill	10-06-08 Samples 18-21s-09-12	G14	3061119A4	Invasive Carcinoma	FAT-Hs00170627_m1	3	CHTN	74	T2N0M0	2A	T2N0M0	0		infiltrating ductal carcinoma with mucinous differentiation	8523/3: Infiltrating duct mixed with other types of ca.	2	1	Well-differentiated						22.9565	8.0076	14.9489
2 RebeccaRepeat	Br 2 LDA 11-18-09 Plate 1	K16	3062104A7	Invasive Carcinoma	FAT-Hs00170627_m1	1	CHTN	52	T2, N0, M0	2A	T2, N0, M0	0	F	Invasive ductal carcinoma	8500/3: Infiltrating duct carcinoma, NOS	2	3	Poorly Differentiated						25.2025	5.27169	19.9308	19.9466
2 RebeccaRepeat	Br 2 LDA 11-18-09 Plate 1	K18	3062104A7	Invasive Carcinoma	FAT-Hs00170627_m1	2	CHTN	52	T2, N0, M0	2A	T2, N0, M0	0	F	Invasive ductal carcinoma	8500/3: Infiltrating duct carcinoma, NOS	2	3	Poorly Differentiated						25.1529	5.27169	19.8812
2 RebeccaRepeat	Br 2 LDA 11-18-09 Plate 1	K17	3062104A7	Invasive Carcinoma	FAT-Hs00170627_m1	3	CHTN	52	T2, N0, M0	2A	T2, N0, M0	0	F	Invasive ductal carcinoma	8500/3: Infiltrating duct carcinoma, NOS	2	3	Poorly Differentiated						25.2995	5.27169	20.0278
Jill	10-06-08 Samples 13-16-s-08-09	K13	3070617A7	Invasive Carcinoma	FAT-Hs00170627_m1	1	CHTN	83	T3N0M0	2B	T3N0M0	0		infiltrating ductal carcinoma	8500/3: Infiltrating duct carcinoma, NOS	2	2	Moderately differentiated		positive/positive				24.1207	10.0795	14.0412	13.9613
Jill	10-06-08 Samples 13-16-s-08-09	K15	3070617A7	Invasive Carcinoma	FAT-Hs00170627_m1	2	CHTN	83	T3N0M0	2B	T3N0M0	0		infiltrating ductal carcinoma	8500/3: Infiltrating duct carcinoma, NOS	2	2	Moderately differentiated		positive/positive				23.9473	10.0795	13.8677
Jill	10-06-08 Samples 13-16-s-08-09	K14	3070617A7	Invasive Carcinoma	FAT-Hs00170627_m1	3	CHTN	83	T3N0M0	2B	T3N0M0	0		infiltrating ductal carcinoma	8500/3: Infiltrating duct carcinoma, NOS	2	2	Moderately differentiated		positive/positive				24.0546	10.0795	13.9751
Jill	10-06-08 Samples 22-25Maricicass12-16	G13	4060634A10	Invasive Carcinoma	FAT-Hs00170627_m1	1	CHTN	79	T2N0M0	2A	T2N0M0	0		infiltrating ductal carcinoma with foci of cartilagginous metaplasia (metaplastic carcinoma)	8523/3: Infiltrating duct mixed with other types of ca.	2	3	Poorly differentiated						23.8433	8.78822	15.055	14.9835
Jill	10-06-08 Samples 22-25Maricicass12-16	G14	4060634A10	Invasive Carcinoma	FAT-Hs00170627_m1	2	CHTN	79	T2N0M0	2A	T2N0M0	0		infiltrating ductal carcinoma with foci of cartilagginous metaplasia (metaplastic carcinoma)	8523/3: Infiltrating duct mixed with other types of ca.	2	3	Poorly differentiated						23.7026	8.78822	14.9144
Jill	10-06-08 Samples 22-25Maricicass12-16	G15	4060634A10	Invasive Carcinoma	FAT-Hs00170627_m1	3	CHTN	79	T2N0M0	2A	T2N0M0	0		infiltrating ductal carcinoma with foci of cartilagginous metaplasia (metaplastic carcinoma)	8523/3: Infiltrating duct mixed with other types of ca.	2	3	Poorly differentiated						23.7694	8.78822	14.9811
Jill	10-02-08 Samples 9-12	K15	4061094B24	Invasive Carcinoma	FAT-Hs00170627_m1	1	CHTN	84	T3N1M0	3C	T3N1M0	1		infiltrating ductal carcinoma	8500/3: Infiltrating duct carcinoma, NOS	3	3	Poorly differentiated						22.1914	11.0615	11.13	11.0912
Jill	10-02-08 Samples 9-12	K13	4061094B24	Invasive Carcinoma	FAT-Hs00170627_m1	2	CHTN	84	T3N1M0	3C	T3N1M0	1		infiltrating ductal carcinoma	8500/3: Infiltrating duct carcinoma, NOS	3	3	Poorly differentiated						22.1191	11.0615	11.0576
Jill	10-02-08 Samples 9-12	K14	4061094B24	Invasive Carcinoma	FAT-Hs00170627_m1	3	CHTN	84	T3N1M0	3C	T3N1M0	1		infiltrating ductal carcinoma	8500/3: Infiltrating duct carcinoma, NOS	3	3	Poorly differentiated						22.1474	11.0615	11.086
Jill	10-02-08 Samples 9-12	O13	4061196A1	Invasive Carcinoma	FAT-Hs00170627_m1	1	CHTN	75	T2N0M0	2A	T2N0M0	0		infiltrating lobular carcinoma with pleomorphic features and infiltrating ductal carcinoma (small component)	8524/3: Infiltrating lobular mixed with other types of ca.	2	2	Moderately differentiated						23.0281	7.20059	15.8275	15.8861
Jill	10-02-08 Samples 9-12	O14	4061196A1	Invasive Carcinoma	FAT-Hs00170627_m1	2	CHTN	75	T2N0M0	2A	T2N0M0	0		infiltrating lobular carcinoma with pleomorphic features and infiltrating ductal carcinoma (small component)	8524/3: Infiltrating lobular mixed with other types of ca.	2	2	Moderately differentiated						23.0738	7.20059	15.8732
Jill	10-02-08 Samples 9-12	O15	4061196A1	Invasive Carcinoma	FAT-Hs00170627_m1	3	CHTN	75	T2N0M0	2A	T2N0M0	0		infiltrating lobular carcinoma with pleomorphic features and infiltrating ductal carcinoma (small component)	8524/3: Infiltrating lobular mixed with other types of ca.	2	2	Moderately differentiated						23.1581	7.20059	15.9575
Jill	10-06-08 Samples 13-16-s-08-09	O13	4070249A3	Invasive Carcinoma	FAT-Hs00170627_m1	1	CHTN	61	T2N0M0	2A	T2N0M0	0		invasive lobular carcinoma, pleomorphic type with signet-ring cell features	8524/3: Infiltrating lobular mixed with other types of ca.	2	1	Well-differentiated						27.2034	11.885	15.3184	15.3258
Jill	10-06-08 Samples 13-16-s-08-09	O14	4070249A3	Invasive Carcinoma	FAT-Hs00170627_m1	2	CHTN	61	T2N0M0	2A	T2N0M0	0		invasive lobular carcinoma, pleomorphic type with signet-ring cell features	8524/3: Infiltrating lobular mixed with other types of ca.	2	1	Well-differentiated						27.205	11.885	15.32
Jill	10-06-08 Samples 13-16-s-08-09	O15	4070249A3	Invasive Carcinoma	FAT-Hs00170627_m1	3	CHTN	61	T2N0M0	2A	T2N0M0	0		invasive lobular carcinoma, pleomorphic type with signet-ring cell features	8524/3: Infiltrating lobular mixed with other types of ca.	2	1	Well-differentiated						27.2239	11.885	15.3389
RebeccaRepeat	Br 2 LDA 9-28-09 Plate 1	K16	4080633A6	Invasive Carcinoma	FAT-Hs00170627_m1	1	CHTN	65	T3, N1, M0	3A	T3, N1, M0	1	F	Invasive Ductal Carcinoma	8500/3: Infiltrating duct carcinoma, NOS	3	3	Poorly Differentiated	Frozen& Paraffin					24.6178	10.7268	13.891	13.895
RebeccaRepeat	Br 2 LDA 9-28-09 Plate 1	K18	4080633A6	Invasive Carcinoma	FAT-Hs00170627_m1	2	CHTN	65	T3, N1, M0	3A	T3, N1, M0	1	F	Invasive Ductal Carcinoma	8500/3: Infiltrating duct carcinoma, NOS	3	3	Poorly Differentiated	Frozen& Paraffin					24.6641	10.7268	13.9373
RebeccaRepeat	Br 2 LDA 9-28-09 Plate 1	K17	4080633A6	Invasive Carcinoma	FAT-Hs00170627_m1	3	CHTN	65	T3, N1, M0	3A	T3, N1, M0	1	F	Invasive Ductal Carcinoma	8500/3: Infiltrating duct carcinoma, NOS	3	3	Poorly Differentiated	Frozen& Paraffin					24.5834	10.7268	13.8566
RebeccaLast	Br 2 LDA 1-7-10 Plate 1	K18	T03-104	Invasive Carcinoma	FAT-Hs00170627_m1	1	WVUTB	Missing	T3N1M0	3A	T3N1M0	1	F	Infiltrating Ductal Carcinoma	8500/3: Infiltrating duct carcinoma, NOS	3	3	Poorly differentiated	Frozen	negative/negative	negative			25.9338	14.5378	11.396	11.3041
RebeccaLast	Br 2 LDA 1-7-10 Plate 1	K16	T03-104	Invasive Carcinoma	FAT-Hs00170627_m1	2	WVUTB	Missing	T3N1M0	3A	T3N1M0	1	F	Infiltrating Ductal Carcinoma	8500/3: Infiltrating duct carcinoma, NOS	3	3	Poorly differentiated	Frozen	negative/negative	negative			25.7546	14.5378	11.2168
RebeccaLast	Br 2 LDA 1-7-10 Plate 1	K17	T03-104	Invasive Carcinoma	FAT-Hs00170627_m1	3	WVUTB	Missing	T3N1M0	3A	T3N1M0	1	F	Infiltrating Ductal Carcinoma	8500/3: Infiltrating duct carcinoma, NOS	3	3	Poorly differentiated	Frozen	negative/negative	negative			25.8373	14.5378	11.2996
Jill	10-09-08 Samples 50-53s40-44	C13	T033474	Invasive Carcinoma	FAT-Hs00170627_m1	1	WVUTB	50	I;T1,NO,MO		T1,NO,MO	0		infiltrating ductal carcinoma	8500/3: Infiltrating duct carcinoma, NOS	1	2	Moderately Differentiated						26.7019	8.56206	18.1398	18.1737
Jill	10-09-08 Samples 50-53s40-44	C14	T033474	Invasive Carcinoma	FAT-Hs00170627_m1	2	WVUTB	50	I;T1,NO,MO		T1,NO,MO	0		infiltrating ductal carcinoma	8500/3: Infiltrating duct carcinoma, NOS	1	2	Moderately Differentiated						26.6565	8.56206	18.0944
Jill	10-09-08 Samples 50-53s40-44	C15	T033474	Invasive Carcinoma	FAT-Hs00170627_m1	3	WVUTB	50	I;T1,NO,MO		T1,NO,MO	0		infiltrating ductal carcinoma	8500/3: Infiltrating duct carcinoma, NOS	1	2	Moderately Differentiated						26.8487	8.56206	18.2867
Jill	10-09-08 Samples 50-53s40-44	K13	T041014	Invasive Carcinoma	FAT-Hs00170627_m1	1	WVUTB	66	IIA,T2, N0, M0		T2, N0, M0	0		invasive ductal carcinoma	8500/3: Infiltrating duct carcinoma, NOS	2	3	Poorly differentiated						25.27	5.78564	19.4844	19.4234
Jill	10-09-08 Samples 50-53s40-44	K14	T041014	Invasive Carcinoma	FAT-Hs00170627_m1	2	WVUTB	66	IIA,T2, N0, M0		T2, N0, M0	0		invasive ductal carcinoma	8500/3: Infiltrating duct carcinoma, NOS	2	3	Poorly differentiated						25.1921	5.78564	19.4065
Jill	10-09-08 Samples 50-53s40-44	K15	T041014	Invasive Carcinoma	FAT-Hs00170627_m1	3	WVUTB	66	IIA,T2, N0, M0		T2, N0, M0	0		invasive ductal carcinoma	8500/3: Infiltrating duct carcinoma, NOS	2	3	Poorly differentiated						25.165	5.78564	19.3793
2 RebeccaRepeat	Br 2 LDA 11-16-09 Plate 1	O18	T04-167-005	Invasive Carcinoma	FAT-Hs00170627_m1	1	WVUTB	43	T2, N0, M0	2A	T2, N0, M0	0	F	Infiltrating metastatic ductal carcinoma	8500/3: Infiltrating duct carcinoma, NOS	2	3	Poorly differentiated	Frozen	positive/positive	intermediate	Pre menopausal		28.3701	10.7992	17.5708	17.5858
2 RebeccaRepeat	Br 2 LDA 11-16-09 Plate 1	O16	T04-167-005	Invasive Carcinoma	FAT-Hs00170627_m1	2	WVUTB	43	T2, N0, M0	2A	T2, N0, M0	0	F	Infiltrating metastatic ductal carcinoma	8500/3: Infiltrating duct carcinoma, NOS	2	3	Poorly differentiated	Frozen	positive/positive	intermediate	Pre menopausal		28.3883	10.7992	17.589
2 RebeccaRepeat	Br 2 LDA 11-16-09 Plate 1	O17	T04-167-005	Invasive Carcinoma	FAT-Hs00170627_m1	3	WVUTB	43	T2, N0, M0	2A	T2, N0, M0	0	F	Infiltrating metastatic ductal carcinoma	8500/3: Infiltrating duct carcinoma, NOS	2	3	Poorly differentiated	Frozen	positive/positive	intermediate	Pre menopausal		28.3969	10.7992	17.5976
Jill	10-09-08 Samples 46-49s37-40	K13	T053774	Invasive Carcinoma	FAT-Hs00170627_m1	1	WVUTB	59	IIA;T2,N0,M0		T2,N0,M0	0		infiltrating ductal carcinoma	8500/3: Infiltrating duct carcinoma, NOS	2	3	Poorly differentiated						22.6272	5.64001	16.9872	17.0176
Jill	10-09-08 Samples 46-49s37-40	K14	T053774	Invasive Carcinoma	FAT-Hs00170627_m1	2	WVUTB	59	IIA;T2,N0,M0		T2,N0,M0	0		infiltrating ductal carcinoma	8500/3: Infiltrating duct carcinoma, NOS	2	3	Poorly differentiated						22.5866	5.64001	16.9466
Jill	10-09-08 Samples 46-49s37-40	K15	T053774	Invasive Carcinoma	FAT-Hs00170627_m1	3	WVUTB	59	IIA;T2,N0,M0		T2,N0,M0	0		infiltrating ductal carcinoma	8500/3: Infiltrating duct carcinoma, NOS	2	3	Poorly differentiated						22.759	5.64001	17.119
Jill	10-07-08 Samples 34-37-Maricicas-27-28	C14	T053889	Invasive Carcinoma	FAT-Hs00170627_m1	1	WVUTB	80	IIA, pT2, pN0, pM0		pT2, pN0, pM0	0		infiltrating ductal adenocarcinoma	8500/3: Infiltrating duct carcinoma, NOS	2	3	Poorly differentiated						24.2248	7.30877	16.916	16.8621
Jill	10-07-08 Samples 34-37-Maricicas-27-28	C13	T053889	Invasive Carcinoma	FAT-Hs00170627_m1	2	WVUTB	80	IIA, pT2, pN0, pM0		pT2, pN0, pM0	0		infiltrating ductal adenocarcinoma	8500/3: Infiltrating duct carcinoma, NOS	2	3	Poorly differentiated						24.1116	7.30877	16.8029
Jill	10-07-08 Samples 34-37-Maricicas-27-28	C15	T053889	Invasive Carcinoma	FAT-Hs00170627_m1	3	WVUTB	80	IIA, pT2, pN0, pM0		pT2, pN0, pM0	0		infiltrating ductal adenocarcinoma	8500/3: Infiltrating duct carcinoma, NOS	2	3	Poorly differentiated						24.1762	7.30877	16.8675
Jill	10-08-08 Samples 38-41s31-32	O14	T0607908	Invasive Carcinoma	FAT-Hs00170627_m1	1	WVUTB	46	IIA, pT2N0M0		pT2N0M0	0		papillary carcinoma	8050/3: Papillary carcinoma, NOS	2	2	Moderately differentiated						22.6752	6.56973	16.1055	16.0943
Jill	10-08-08 Samples 38-41s31-32	O15	T0607908	Invasive Carcinoma	FAT-Hs00170627_m1	2	WVUTB	46	IIA, pT2N0M0		pT2N0M0	0		papillary carcinoma	8050/3: Papillary carcinoma, NOS	2	2	Moderately differentiated						22.6318	6.56973	16.0621
Jill	10-08-08 Samples 38-41s31-32	O13	T0607908	Invasive Carcinoma	FAT-Hs00170627_m1	3	WVUTB	46	IIA, pT2N0M0		pT2N0M0	0		papillary carcinoma	8050/3: Papillary carcinoma, NOS	2	2	Moderately differentiated						22.6849	6.56973	16.1152
Jill	10-08-08 Samples 42-45s32-36	K13	T061324	Invasive Carcinoma	FAT-Hs00170627_m1	1	WVUTB	55	II, pT2, pN0, pM0		pT2, pN0, pM0	0		invasive ductal adenocarcinoma, mucinous	8500/3: Infiltrating duct carcinoma, NOS	2	3	Poorly Differentiated						25.2628	6.26543	18.9974	18.9928
Jill	10-08-08 Samples 42-45s32-36	K14	T061324	Invasive Carcinoma	FAT-Hs00170627_m1	2	WVUTB	55	II, pT2, pN0, pM0		pT2, pN0, pM0	0		invasive ductal adenocarcinoma, mucinous	8500/3: Infiltrating duct carcinoma, NOS	2	3	Poorly Differentiated						25.1972	6.26543	18.9317
Jill	10-08-08 Samples 42-45s32-36	K15	T061324	Invasive Carcinoma	FAT-Hs00170627_m1	3	WVUTB	55	II, pT2, pN0, pM0		pT2, pN0, pM0	0		invasive ductal adenocarcinoma, mucinous	8500/3: Infiltrating duct carcinoma, NOS	2	3	Poorly Differentiated						25.3147	6.26543	19.0493
Jill	10-07-08 Samples 34-37-Maricicas-27-28	K13	T0621513	Invasive Carcinoma	FAT-Hs00170627_m1	1	WVUTB	86	IIIB, T4, N1, M0		T4, N1, M0	1		mammary carcinoma, predominately mucinous adenocarcinoma with areas of infiltrating ductal carcinoma	8480/3: Mucinous adenocarcinoma	3	3	Poorly differentiated						23.8205	7.7534	16.0671	16.0492
Jill	10-07-08 Samples 34-37-Maricicas-27-28	K14	T0621513	Invasive Carcinoma	FAT-Hs00170627_m1	2	WVUTB	86	IIIB, T4, N1, M0		T4, N1, M0	1		mammary carcinoma, predominately mucinous adenocarcinoma with areas of infiltrating ductal carcinoma	8480/3: Mucinous adenocarcinoma	3	3	Poorly differentiated						23.8162	7.7534	16.0628
Jill	10-07-08 Samples 34-37-Maricicas-27-28	K15	T0621513	Invasive Carcinoma	FAT-Hs00170627_m1	3	WVUTB	86	IIIB, T4, N1, M0		T4, N1, M0	1		mammary carcinoma, predominately mucinous adenocarcinoma with areas of infiltrating ductal carcinoma	8480/3: Mucinous adenocarcinoma	3	3	Poorly differentiated						23.7711	7.7534	16.0177
Jill	10-07-08 Samples 34-37-Maricicas-27-28	O15	T0630919	Invasive Carcinoma	FAT-Hs00170627_m1	1	WVUTB	58	I, pT1,pN0, pM0		pT1,pN0, pM0	0		invasive ductal carcinoma, mucinous carcinoma	8500/3: Infiltrating duct carcinoma, NOS	1	1	Well-differentiated						23.2312	8.44754	14.7836	14.7526
Jill	10-07-08 Samples 34-37-Maricicas-27-28	O14	T0630919	Invasive Carcinoma	FAT-Hs00170627_m1	2	WVUTB	58	I, pT1,pN0, pM0		pT1,pN0, pM0	0		invasive ductal carcinoma, mucinous carcinoma	8500/3: Infiltrating duct carcinoma, NOS	1	1	Well-differentiated						23.1905	8.44754	14.7429
Jill	10-07-08 Samples 34-37-Maricicas-27-28	O13	T0630919	Invasive Carcinoma	FAT-Hs00170627_m1	3	WVUTB	58	I, pT1,pN0, pM0		pT1,pN0, pM0	0		invasive ductal carcinoma, mucinous carcinoma	8500/3: Infiltrating duct carcinoma, NOS	1	1	Well-differentiated						23.1788	8.44754	14.7312
RebeccaRepeat	Br 2 LDA 9-28-09 Plate 2	K18	T06-326-013	Invasive Carcinoma	FAT-Hs00170627_m1	1	WVUTB	44	pT2, pN2a, pMx	3A	pT2, pN2a, pMx	1	F	Invasive ductal carcinoma	8500/3: Infiltrating duct carcinoma, NOS	3	3	Poorly differentiated	Frozen	Positive / Positive	negative			26.7896	9.01661	17.773	17.7167
RebeccaRepeat	Br 2 LDA 9-28-09 Plate 2	K16	T06-326-013	Invasive Carcinoma	FAT-Hs00170627_m1	2	WVUTB	44	pT2, pN2a, pMx	3A	pT2, pN2a, pMx	1	F	Invasive ductal carcinoma	8500/3: Infiltrating duct carcinoma, NOS	3	3	Poorly differentiated	Frozen	Positive / Positive	negative			26.6761	9.01661	17.6595
RebeccaRepeat	Br 2 LDA 9-28-09 Plate 2	K17	T06-326-013	Invasive Carcinoma	FAT-Hs00170627_m1	3	WVUTB	44	pT2, pN2a, pMx	3A	pT2, pN2a, pMx	1	F	Invasive ductal carcinoma	8500/3: Infiltrating duct carcinoma, NOS	3	3	Poorly differentiated	Frozen	Positive / Positive	negative			26.7342	9.01661	17.7176
Jill	10-08-08 Samples 38-41s31-32	C13	T0633206	Invasive Carcinoma	FAT-Hs00170627_m1	1	WVUTB	50	IIA, pT2, pN0, pM0		pT2, pN0, pM0	0		invasive ductal carcinoma	8500/3: Infiltrating duct carcinoma, NOS	2	1	Well-differentiated						24.3408	8.27849	16.0623	16.0716
Jill	10-08-08 Samples 38-41s31-32	C15	T0633206	Invasive Carcinoma	FAT-Hs00170627_m1	2	WVUTB	50	IIA, pT2, pN0, pM0		pT2, pN0, pM0	0		invasive ductal carcinoma	8500/3: Infiltrating duct carcinoma, NOS	2	1	Well-differentiated						24.3028	8.27849	16.0243
Jill	10-08-08 Samples 38-41s31-32	C14	T0633206	Invasive Carcinoma	FAT-Hs00170627_m1	3	WVUTB	50	IIA, pT2, pN0, pM0		pT2, pN0, pM0	0		invasive ductal carcinoma	8500/3: Infiltrating duct carcinoma, NOS	2	1	Well-differentiated						24.4067	8.27849	16.1282
Jill	10-08-08 Samples 42-45s32-36	C14	T0633418	Invasive Carcinoma	FAT-Hs00170627_m1	1	WVUTB	50	IIIC, pT1, pN3a, pM0		pT1, pN3a, pM0	1		infiltrating ductal adenocarcinoma	8500/3: Infiltrating duct carcinoma, NOS	3	3	Poorly Differentiated						21.9324	4.40614	17.5262	17.5445
Jill	10-08-08 Samples 42-45s32-36	C13	T0633418	Invasive Carcinoma	FAT-Hs00170627_m1	2	WVUTB	50	IIIC, pT1, pN3a, pM0		pT1, pN3a, pM0	1		infiltrating ductal adenocarcinoma	8500/3: Infiltrating duct carcinoma, NOS	3	3	Poorly Differentiated						21.9795	4.40614	17.5733
Jill	10-08-08 Samples 42-45s32-36	C15	T0633418	Invasive Carcinoma	FAT-Hs00170627_m1	3	WVUTB	50	IIIC, pT1, pN3a, pM0		pT1, pN3a, pM0	1		infiltrating ductal adenocarcinoma	8500/3: Infiltrating duct carcinoma, NOS	3	3	Poorly Differentiated						21.9402	4.40614	17.5341
Jill	10-07-08 Samples 26-29s-17-20	C13	T066004	Invasive Carcinoma	FAT-Hs00170627_m1	1	WVUTB	46	IIA, T2, N1, M0		T2, N1, M0	1		infiltrating ductal carcinoma	8500/3: Infiltrating duct carcinoma, NOS	2	3	Poorly differentiated						25.9993	8.53468	17.4646	17.5992
Jill	10-07-08 Samples 26-29s-17-20	C15	T066004	Invasive Carcinoma	FAT-Hs00170627_m1	2	WVUTB	46	IIA, T2, N1, M0		T2, N1, M0	1		infiltrating ductal carcinoma	8500/3: Infiltrating duct carcinoma, NOS	2	3	Poorly differentiated						26.3904	8.53468	17.8557
Jill	10-07-08 Samples 26-29s-17-20	C14	T066004	Invasive Carcinoma	FAT-Hs00170627_m1	3	WVUTB	46	IIA, T2, N1, M0		T2, N1, M0	1		infiltrating ductal carcinoma	8500/3: Infiltrating duct carcinoma, NOS	2	3	Poorly differentiated						26.0121	8.53468	17.4774
Jill	10-07-08 Samples 30-33s-21-24	K14	T069213	Invasive Carcinoma	FAT-Hs00170627_m1	1	WVUTB	80	1, T1, N0, M0		T1, N0, M0	0		invasive pleomorphic lobular carcinoma	8524/3: Infiltrating lobular mixed with other types of ca.	1	3	Poorly differentiated						25.8365	7.49955	18.337	18.3709
Jill	10-07-08 Samples 30-33s-21-24	K13	T069213	Invasive Carcinoma	FAT-Hs00170627_m1	2	WVUTB	80	1, T1, N0, M0		T1, N0, M0	0		invasive pleomorphic lobular carcinoma	8524/3: Infiltrating lobular mixed with other types of ca.	1	3	Poorly differentiated						25.6867	7.49955	18.1872
Jill	10-07-08 Samples 30-33s-21-24	K15	T069213	Invasive Carcinoma	FAT-Hs00170627_m1	3	WVUTB	80	1, T1, N0, M0		T1, N0, M0	0		invasive pleomorphic lobular carcinoma	8524/3: Infiltrating lobular mixed with other types of ca.	1	3	Poorly differentiated						26.0882	7.49955	18.5887
2 RebeccaRepeat	Br 2 LDA 11-10-09 Plate 1	C17	T07-086-004	Invasive Carcinoma	FAT-Hs00170627_m1	1	WVUTB	45	pT1c, pN0(i-), pM0	1	pT1c, pN0(i-), pM0	0	F	Invasive ductal carcinoma	8500/3: Infiltrating duct carcinoma, NOS	1	3	Poorly differentiated	Frozen	positive / positive	negative			33.8373	28.6578	5.17941	4.9384
2 RebeccaRepeat	Br 2 LDA 11-10-09 Plate 1	C18	T07-086-004	Invasive Carcinoma	FAT-Hs00170627_m1	2	WVUTB	45	pT1c, pN0(i-), pM0	1	pT1c, pN0(i-), pM0	0	F	Invasive ductal carcinoma	8500/3: Infiltrating duct carcinoma, NOS	1	3	Poorly differentiated	Frozen	positive / positive	negative				28.6578
2 RebeccaRepeat	Br 2 LDA 11-10-09 Plate 1	C16	T07-086-004	Invasive Carcinoma	FAT-Hs00170627_m1	3	WVUTB	45	pT1c, pN0(i-), pM0	1	pT1c, pN0(i-), pM0	0	F	Invasive ductal carcinoma	8500/3: Infiltrating duct carcinoma, NOS	1	3	Poorly differentiated	Frozen	positive / positive	negative			33.3552	28.6578	4.69738
Jill	10-09-08 Samples 46-49s37-40	C14	T0714312	Invasive Carcinoma	FAT-Hs00170627_m1	1	WVUTB	42	IIA;T2,N0,M0		T2,N0,M0	0		recurrent/residual infiltrating ductal adenocarcinoma with an extensive intraductal component	8500/3: Infiltrating duct carcinoma, NOS	2	3	Poorly differentiated						25.422	6.7503	18.6717	18.6764
Jill	10-09-08 Samples 46-49s37-40	C13	T0714312	Invasive Carcinoma	FAT-Hs00170627_m1	2	WVUTB	42	IIA;T2,N0,M0		T2,N0,M0	0		recurrent/residual infiltrating ductal adenocarcinoma with an extensive intraductal component	8500/3: Infiltrating duct carcinoma, NOS	2	3	Poorly differentiated						25.5174	6.7503	18.7671
Jill	10-09-08 Samples 46-49s37-40	C15	T0714312	Invasive Carcinoma	FAT-Hs00170627_m1	3	WVUTB	42	IIA;T2,N0,M0		T2,N0,M0	0		recurrent/residual infiltrating ductal adenocarcinoma with an extensive intraductal component	8500/3: Infiltrating duct carcinoma, NOS	2	3	Poorly differentiated						25.3406	6.7503	18.5903
Jill	10-09-08 Samples 46-49s37-40	O15	T071626	Invasive Carcinoma	FAT-Hs00170627_m1	1	WVUTB	69	IV, pT3, pN1a, pM0		pT3, pN1a, pM0	1		invasive ductal carcinoma	8500/3: Infiltrating duct carcinoma, NOS	3	3	Poorly differentiated						22.0943	6.71873	15.3756	15.3087
Jill	10-09-08 Samples 46-49s37-40	O13	T071626	Invasive Carcinoma	FAT-Hs00170627_m1	2	WVUTB	69	IV, pT3, pN1a, pM0		pT3, pN1a, pM0	1		invasive ductal carcinoma	8500/3: Infiltrating duct carcinoma, NOS	3	3	Poorly differentiated						21.9505	6.71873	15.2318
Jill	10-09-08 Samples 46-49s37-40	O14	T071626	Invasive Carcinoma	FAT-Hs00170627_m1	3	WVUTB	69	IV, pT3, pN1a, pM0		pT3, pN1a, pM0	1		invasive ductal carcinoma	8500/3: Infiltrating duct carcinoma, NOS	3	3	Poorly differentiated						22.0374	6.71873	15.3186
Jill	10-09-08 Samples 50-53s40-44	O14	T0717210	Invasive Carcinoma	FAT-Hs00170627_m1	1	WVUTB	50	IIIB,pT2, pN2a, pM0		pT2, pN2a, pM0	1		invasive ductal carcinoma	8500/3: Infiltrating duct carcinoma, NOS	3	2	Moderately differentiated						24.9627	7.90212	17.0606	17.099
Jill	10-09-08 Samples 50-53s40-44	O13	T0717210	Invasive Carcinoma	FAT-Hs00170627_m1	2	WVUTB	50	IIIB,pT2, pN2a, pM0		pT2, pN2a, pM0	1		invasive ductal carcinoma	8500/3: Infiltrating duct carcinoma, NOS	3	2	Moderately differentiated						24.9598	7.90212	17.0576
Jill	10-09-08 Samples 50-53s40-44	O15	T0717210	Invasive Carcinoma	FAT-Hs00170627_m1	3	WVUTB	50	IIIB,pT2, pN2a, pM0		pT2, pN2a, pM0	1		invasive ductal carcinoma	8500/3: Infiltrating duct carcinoma, NOS	3	2	Moderately differentiated						25.081	7.90212	17.1789
Jill	10-07-08 Samples 26-29s-17-20	K15	T071976	Invasive Carcinoma	FAT-Hs00170627_m1	1	WVUTB	43	IIIA;T3,N1,M0		T3,N1,M0	1		resdiual, invasive infiltrating ductal carcinoma	8500/3: Infiltrating duct carcinoma, NOS	3	3	Poorly differentiated						20.7321	5.98754	14.7445	14.7046
Jill	10-07-08 Samples 26-29s-17-20	K13	T071976	Invasive Carcinoma	FAT-Hs00170627_m1	2	WVUTB	43	IIIA;T3,N1,M0		T3,N1,M0	1		resdiual, invasive infiltrating ductal carcinoma	8500/3: Infiltrating duct carcinoma, NOS	3	3	Poorly differentiated						20.6798	5.98754	14.6923
Jill	10-07-08 Samples 26-29s-17-20	K14	T071976	Invasive Carcinoma	FAT-Hs00170627_m1	3	WVUTB	43	IIIA;T3,N1,M0		T3,N1,M0	1		resdiual, invasive infiltrating ductal carcinoma	8500/3: Infiltrating duct carcinoma, NOS	3	3	Poorly differentiated						20.6645	5.98754	14.677
Jill	10-08-08 Samples 42-45s32-36	O13	T07593	Invasive Carcinoma	FAT-Hs00170627_m1	1	WVUTB	67	IIB,pT2, pN1b, pM0		pT2, pN1b, pM0	1		invasive ductal carcinoma	8500/3: Infiltrating duct carcinoma, NOS	2	2	Moderately differentiated						24.3131	6.63636	17.6767	17.682
Jill	10-08-08 Samples 42-45s32-36	O14	T07593	Invasive Carcinoma	FAT-Hs00170627_m1	2	WVUTB	67	IIB,pT2, pN1b, pM0		pT2, pN1b, pM0	1		invasive ductal carcinoma	8500/3: Infiltrating duct carcinoma, NOS	2	2	Moderately differentiated						24.3815	6.63636	17.7451
Jill	10-08-08 Samples 42-45s32-36	O15	T07593	Invasive Carcinoma	FAT-Hs00170627_m1	3	WVUTB	67	IIB,pT2, pN1b, pM0		pT2, pN1b, pM0	1		invasive ductal carcinoma	8500/3: Infiltrating duct carcinoma, NOS	2	2	Moderately differentiated						24.2604	6.63636	17.624
Jill	10-07-08 Samples 30-33s-21-24	G13	T07818	Invasive Carcinoma	FAT-Hs00170627_m1	1	WVUTB	43	IIB, T2 N1 M0		T2 N1 M0	1		invasive ductal carcinoma	8500/3: Infiltrating duct carcinoma, NOS	2	3	Poorly differentiated						23.8641	9.34579	14.5183	14.5628
Jill	10-07-08 Samples 30-33s-21-24	G14	T07818	Invasive Carcinoma	FAT-Hs00170627_m1	2	WVUTB	43	IIB, T2 N1 M0		T2 N1 M0	1		invasive ductal carcinoma	8500/3: Infiltrating duct carcinoma, NOS	2	3	Poorly differentiated						23.8341	9.34579	14.4883
Jill	10-07-08 Samples 30-33s-21-24	G15	T07818	Invasive Carcinoma	FAT-Hs00170627_m1	3	WVUTB	43	IIB, T2 N1 M0		T2 N1 M0	1		invasive ductal carcinoma	8500/3: Infiltrating duct carcinoma, NOS	2	3	Poorly differentiated						24.0276	9.34579	14.6818
RebeccaRepeat	Br 2 LDA 9-25-09 Plate 1	K16	T09-013-004	Invasive Carcinoma	FAT-Hs00170627_m1	1	WVUTB	68	T1, N0, M0	1	T1, N0, M0	0	F	Invasive ductal carcinoma	8500/3: Infiltrating duct carcinoma, NOS	1	2	Moderately differentiated	Frozen	positive/positive	negative	Post menopausal		25.4579	9.49052	15.9674	16.0228
RebeccaRepeat	Br 2 LDA 9-25-09 Plate 1	K18	T09-013-004	Invasive Carcinoma	FAT-Hs00170627_m1	2	WVUTB	68	T1, N0, M0	1	T1, N0, M0	0	F	Invasive ductal carcinoma	8500/3: Infiltrating duct carcinoma, NOS	1	2	Moderately differentiated	Frozen	positive/positive	negative	Post menopausal		25.5258	9.49052	16.0352
RebeccaRepeat	Br 2 LDA 9-25-09 Plate 1	K17	T09-013-004	Invasive Carcinoma	FAT-Hs00170627_m1	3	WVUTB	68	T1, N0, M0	1	T1, N0, M0	0	F	Invasive ductal carcinoma	8500/3: Infiltrating duct carcinoma, NOS	1	2	Moderately differentiated	Frozen	positive/positive	negative	Post menopausal		25.5564	9.49052	16.0659
RebeccaRepeat	Br 2 LDA 9-28-09 Plate 2	G17	T09-023-003	Invasive Carcinoma	FAT-Hs00170627_m1	1	WVUTB	56	pT1c, pN0(i-), pM0	1	pT1c, pN0(i-), pM0	0	F	Invasive ductal adenocarcinoma	8500/3: Infiltrating duct carcinoma, NOS	1	2	Moderately differentiated	Frozen	positive/positive	positive	Post menopausal		26.3985	11.0381	15.3603	15.4747
RebeccaRepeat	Br 2 LDA 9-28-09 Plate 2	G18	T09-023-003	Invasive Carcinoma	FAT-Hs00170627_m1	2	WVUTB	56	pT1c, pN0(i-), pM0	1	pT1c, pN0(i-), pM0	0	F	Invasive ductal adenocarcinoma	8500/3: Infiltrating duct carcinoma, NOS	1	2	Moderately differentiated	Frozen	positive/positive	positive	Post menopausal		26.5355	11.0381	15.4974
RebeccaRepeat	Br 2 LDA 9-28-09 Plate 2	G16	T09-023-003	Invasive Carcinoma	FAT-Hs00170627_m1	3	WVUTB	56	pT1c, pN0(i-), pM0	1	pT1c, pN0(i-), pM0	0	F	Invasive ductal adenocarcinoma	8500/3: Infiltrating duct carcinoma, NOS	1	2	Moderately differentiated	Frozen	positive/positive	positive	Post menopausal		26.6046	11.0381	15.5665
RebeccaRepeat	Br 2 LDA 9-28-09 Plate 2	O17	T09-034-002	Invasive Carcinoma	FAT-Hs00170627_m1	1	WVUTB	51	pT1c, pN0, pM0	1	pT1c, pN0, pM0	0	F	Invasive lobular carcinoma	8524/3: Infiltrating lobular mixed with other types of ca.	1	2	Moderately differentiated	Frozen	positive/positive	negative	perimenopausal		25.9067	10.7996	15.1071	15.1123
RebeccaRepeat	Br 2 LDA 9-28-09 Plate 2	O16	T09-034-002	Invasive Carcinoma	FAT-Hs00170627_m1	2	WVUTB	51	pT1c, pN0, pM0	1	pT1c, pN0, pM0	0	F	Invasive lobular carcinoma	8524/3: Infiltrating lobular mixed with other types of ca.	1	2	Moderately differentiated	Frozen	positive/positive	negative	perimenopausal		25.9076	10.7996	15.108
RebeccaRepeat	Br 2 LDA 9-28-09 Plate 2	O18	T09-034-002	Invasive Carcinoma	FAT-Hs00170627_m1	3	WVUTB	51	pT1c, pN0, pM0	1	pT1c, pN0, pM0	0	F	Invasive lobular carcinoma	8524/3: Infiltrating lobular mixed with other types of ca.	1	2	Moderately differentiated	Frozen	positive/positive	negative	perimenopausal		25.9213	10.7996	15.1217
2 RebeccaRepeat	Br 2 LDA 11-16-09 Plate 1	K16	T09-035-001	Invasive Carcinoma	FAT-Hs00170627_m1	1	WVUTB	78	pT2, pN0(i-), pM0	2A	pT2, pN0(i-), pM0	0	F	Invasive lobular carcinoma	8524/3: Infiltrating lobular mixed with other types of ca.	2	2	Moderately differentiated	Frozen	positive/negative	negative	Post menopausal		34.0037	29.0066	4.99708	5.85269
2 RebeccaRepeat	Br 2 LDA 11-16-09 Plate 1	K17	T09-035-001	Invasive Carcinoma	FAT-Hs00170627_m1	2	WVUTB	78	pT2, pN0(i-), pM0	2A	pT2, pN0(i-), pM0	0	F	Invasive lobular carcinoma	8524/3: Infiltrating lobular mixed with other types of ca.	2	2	Moderately differentiated	Frozen	positive/negative	negative	Post menopausal		34.582	29.0066	5.57538
2 RebeccaRepeat	Br 2 LDA 11-16-09 Plate 1	K18	T09-035-001	Invasive Carcinoma	FAT-Hs00170627_m1	3	WVUTB	78	pT2, pN0(i-), pM0	2A	pT2, pN0(i-), pM0	0	F	Invasive lobular carcinoma	8524/3: Infiltrating lobular mixed with other types of ca.	2	2	Moderately differentiated	Frozen	positive/negative	negative	Post menopausal		35.9922	29.0066	6.98562
2 RebeccaRepeat	Br 2 LDA 11-18-09 Plate 2	C18	T09-047-003	Invasive Carcinoma	FAT-Hs00170627_m1	1	WVUTB	51	pT1c pN0(i-),pM0	1A	pT1c pN0(i-),pM0	0	F	Mucinous carcinoma	8480/3: Mucinous adenocarcinoma	1	2	Moderately differentiated	Frozen	positive/positive	negative			25.7963	9.77874	16.0176	16.0626
2 RebeccaRepeat	Br 2 LDA 11-18-09 Plate 2	C16	T09-047-003	Invasive Carcinoma	FAT-Hs00170627_m1	2	WVUTB	51	pT1c pN0(i-),pM0	1A	pT1c pN0(i-),pM0	0	F	Mucinous carcinoma	8480/3: Mucinous adenocarcinoma	1	2	Moderately differentiated	Frozen	positive/positive	negative			25.7899	9.77874	16.0112
2 RebeccaRepeat	Br 2 LDA 11-18-09 Plate 2	C17	T09-047-003	Invasive Carcinoma	FAT-Hs00170627_m1	3	WVUTB	51	pT1c pN0(i-),pM0	1A	pT1c pN0(i-),pM0	0	F	Mucinous carcinoma	8480/3: Mucinous adenocarcinoma	1	2	Moderately differentiated	Frozen	positive/positive	negative			25.9379	9.77874	16.1591
2 RebeccaRepeat	Br 2 LDA 11-18-09 Plate 2	K18	T09-064-001	Invasive Carcinoma	FAT-Hs00170627_m1	1	WVUTB	44	pT1c, N1a, M0	2A	pT1c, N1a, M0	1	F	Invasive ductal carcinoma	8500/3: Infiltrating duct carcinoma, NOS	2	2	Moderately differentiated	Frozen	positive/positive	negative	Pre menopausal		26.5051	10.4652	16.0399	15.9816
2 RebeccaRepeat	Br 2 LDA 11-18-09 Plate 2	K16	T09-064-001	Invasive Carcinoma	FAT-Hs00170627_m1	2	WVUTB	44	pT1c, N1a, M0	2A	pT1c, N1a, M0	1	F	Invasive ductal carcinoma	8500/3: Infiltrating duct carcinoma, NOS	2	2	Moderately differentiated	Frozen	positive/positive	negative	Pre menopausal		26.412	10.4652	15.9467
2 RebeccaRepeat	Br 2 LDA 11-18-09 Plate 2	K17	T09-064-001	Invasive Carcinoma	FAT-Hs00170627_m1	3	WVUTB	44	pT1c, N1a, M0	2A	pT1c, N1a, M0	1	F	Invasive ductal carcinoma	8500/3: Infiltrating duct carcinoma, NOS	2	2	Moderately differentiated	Frozen	positive/positive	negative	Pre menopausal		26.4234	10.4652	15.9582
RebeccaRepeat	Br 2 LDA 9-28-09 Plate 1	O16	T09-089-001	Invasive Carcinoma	FAT-Hs00170627_m1	1	WVUTB	62	pT1c, N0, M0	1A	pT1c, N0, M0	0	F	Residual infiltrating ductal carcinoma	8500/3: Infiltrating duct carcinoma, NOS	1	2	Moderately differentiated	Frozen	positive/negative	positive			25.9492	10.9515	14.9977	14.9086
RebeccaRepeat	Br 2 LDA 9-28-09 Plate 1	O18	T09-089-001	Invasive Carcinoma	FAT-Hs00170627_m1	2	WVUTB	62	pT1c, N0, M0	1A	pT1c, N0, M0	0	F	Residual infiltrating ductal carcinoma	8500/3: Infiltrating duct carcinoma, NOS	1	2	Moderately differentiated	Frozen	positive/negative	positive			25.8182	10.9515	14.8667
RebeccaRepeat	Br 2 LDA 9-28-09 Plate 1	O17	T09-089-001	Invasive Carcinoma	FAT-Hs00170627_m1	3	WVUTB	62	pT1c, N0, M0	1A	pT1c, N0, M0	0	F	Residual infiltrating ductal carcinoma	8500/3: Infiltrating duct carcinoma, NOS	1	2	Moderately differentiated	Frozen	positive/negative	positive			25.8128	10.9515	14.8613
Rebecca	Br 2 LDA 12-7-09 Plate 1	K18	T09-122-007	Invasive Carcinoma	FAT-Hs00170627_m1	1	WVUTB	51	T2,N0,M0	2A	T2,N0,M0	0	F	Infiltrating Ductal Carcinoma	8500/3: Infiltrating duct carcinoma, NOS	2	3	Poorly Differentiated	Frozen	positive/positive	positive			25.9277	9.32693	16.6007	16.5971
Rebecca	Br 2 LDA 12-7-09 Plate 1	K16	T09-122-007	Invasive Carcinoma	FAT-Hs00170627_m1	2	WVUTB	51	T2,N0,M0	2A	T2,N0,M0	0	F	Infiltrating Ductal Carcinoma	8500/3: Infiltrating duct carcinoma, NOS	2	3	Poorly Differentiated	Frozen	positive/positive	positive			25.8924	9.32693	16.5654
Rebecca	Br 2 LDA 12-7-09 Plate 1	K17	T09-122-007	Invasive Carcinoma	FAT-Hs00170627_m1	3	WVUTB	51	T2,N0,M0	2A	T2,N0,M0	0	F	Infiltrating Ductal Carcinoma	8500/3: Infiltrating duct carcinoma, NOS	2	3	Poorly Differentiated	Frozen	positive/positive	positive			25.9519	9.32693	16.625
2 RebeccaRepeat	Br 2 LDA 11-18-09 Plate 2	O18	T09-138-002	Invasive Carcinoma	FAT-Hs00170627_m1	1	WVUTB	70	T2pN0M0	2A	T2pN0M0	0	F	Infiltrating Ductal Carcinoma	8500/3: Infiltrating duct carcinoma, NOS	2	3	Poorly Differentiated	Frozen	negative/negative	negative	Post menopausal		23.4007	8.82736	14.5733	14.5954
2 RebeccaRepeat	Br 2 LDA 11-18-09 Plate 2	O16	T09-138-002	Invasive Carcinoma	FAT-Hs00170627_m1	2	WVUTB	70	T2pN0M0	2A	T2pN0M0	0	F	Infiltrating Ductal Carcinoma	8500/3: Infiltrating duct carcinoma, NOS	2	3	Poorly Differentiated	Frozen	negative/negative	negative	Post menopausal		23.4215	8.82736	14.5942
2 RebeccaRepeat	Br 2 LDA 11-18-09 Plate 2	O17	T09-138-002	Invasive Carcinoma	FAT-Hs00170627_m1	3	WVUTB	70	T2pN0M0	2A	T2pN0M0	0	F	Infiltrating Ductal Carcinoma	8500/3: Infiltrating duct carcinoma, NOS	2	3	Poorly Differentiated	Frozen	negative/negative	negative	Post menopausal		23.446	8.82736	14.6187
Rebecca	Br 2 LDA 12-7-09 Plate 1	O16	T09-141-002	Invasive Carcinoma	FAT-Hs00170627_m1	1	WVUTB	75	pT2pN1aM0	2B	pT2pN1aM0	1	F	Invasive ductal carcinoma	8500/3: Infiltrating duct carcinoma, NOS	2	3	Poorly Differentiated	Frozen	negative/negative	negative	Post menopausal		24.9302	8.92162	16.0086	15.9973
Rebecca	Br 2 LDA 12-7-09 Plate 1	O17	T09-141-002	Invasive Carcinoma	FAT-Hs00170627_m1	2	WVUTB	75	pT2pN1aM0	2B	pT2pN1aM0	1	F	Invasive ductal carcinoma	8500/3: Infiltrating duct carcinoma, NOS	2	3	Poorly Differentiated	Frozen	negative/negative	negative	Post menopausal		24.9434	8.92162	16.0218
Rebecca	Br 2 LDA 12-7-09 Plate 1	O18	T09-141-002	Invasive Carcinoma	FAT-Hs00170627_m1	3	WVUTB	75	pT2pN1aM0	2B	pT2pN1aM0	1	F	Invasive ductal carcinoma	8500/3: Infiltrating duct carcinoma, NOS	2	3	Poorly Differentiated	Frozen	negative/negative	negative	Post menopausal		24.8831	8.92162	15.9615
Rebecca	Br 2 LDA 12-7-09 Plate 1	G16	T09-142-003	Invasive Carcinoma	FAT-Hs00170627_m1	1	WVUTB	37	pT2N3aM0	3C	pT2N3aM0	1	F	Infiltrating Ductal Carcinoma	8500/3: Infiltrating duct carcinoma, NOS	3	3	Poorly Differentiated	Frozen	negative/negative	negative			23.296	9.15739	14.1386	14.2263
Rebecca	Br 2 LDA 12-7-09 Plate 1	G17	T09-142-003	Invasive Carcinoma	FAT-Hs00170627_m1	2	WVUTB	37	pT2N3aM0	3C	pT2N3aM0	1	F	Infiltrating Ductal Carcinoma	8500/3: Infiltrating duct carcinoma, NOS	3	3	Poorly Differentiated	Frozen	negative/negative	negative			23.3941	9.15739	14.2367
Rebecca	Br 2 LDA 12-7-09 Plate 1	G18	T09-142-003	Invasive Carcinoma	FAT-Hs00170627_m1	3	WVUTB	37	pT2N3aM0	3C	pT2N3aM0	1	F	Infiltrating Ductal Carcinoma	8500/3: Infiltrating duct carcinoma, NOS	3	3	Poorly Differentiated	Frozen	negative/negative	negative			23.4609	9.15739	14.3035
Rebecca	Br 2 LDA 12-7-09 Plate 1	C17	T09-150-004	Invasive Carcinoma	FAT-Hs00170627_m1	1	WVUTB	82	pT2N1aM0	2B	pT2N1aM0	1	F	Invasive Ductal Carcinoma	8500/3: Infiltrating duct carcinoma, NOS	2	2	Moderately Differentiated	Frozen	positive/positive	negative	Post menopausal		27.7701	10.3239	17.4462	17.3551
Rebecca	Br 2 LDA 12-7-09 Plate 1	C18	T09-150-004	Invasive Carcinoma	FAT-Hs00170627_m1	2	WVUTB	82	pT2N1aM0	2B	pT2N1aM0	1	F	Invasive Ductal Carcinoma	8500/3: Infiltrating duct carcinoma, NOS	2	2	Moderately Differentiated	Frozen	positive/positive	negative	Post menopausal		27.7298	10.3239	17.4059
Rebecca	Br 2 LDA 12-7-09 Plate 1	C16	T09-150-004	Invasive Carcinoma	FAT-Hs00170627_m1	3	WVUTB	82	pT2N1aM0	2B	pT2N1aM0	1	F	Invasive Ductal Carcinoma	8500/3: Infiltrating duct carcinoma, NOS	2	2	Moderately Differentiated	Frozen	positive/positive	negative	Post menopausal		27.5371	10.3239	17.2132
RebeccaRepeat	Br 2 LDA 9-25-09 Plate 1	O17	Z3588A1B	Invasive Carcinoma	FAT-Hs00170627_m1	1	CHTN	NA	pT3, pN1, M1	4	pT3, pN1, M1	1	missing	Invasive Ductal Carcinoma	8500/3: Infiltrating duct carcinoma, NOS	4	3	Poorly Differentiated	Frozen & Paraffin					26.8142	10.0368	16.7774	16.8256
RebeccaRepeat	Br 2 LDA 9-25-09 Plate 1	O18	Z3588A1B	Invasive Carcinoma	FAT-Hs00170627_m1	2	CHTN	NA	pT3, pN1, M1	4	pT3, pN1, M1	1	missing	Invasive Ductal Carcinoma	8500/3: Infiltrating duct carcinoma, NOS	4	3	Poorly Differentiated	Frozen & Paraffin					26.9279	10.0368	16.891
RebeccaRepeat	Br 2 LDA 9-25-09 Plate 1	O16	Z3588A1B	Invasive Carcinoma	FAT-Hs00170627_m1	3	CHTN	NA	pT3, pN1, M1	4	pT3, pN1, M1	1	missing	Invasive Ductal Carcinoma	8500/3: Infiltrating duct carcinoma, NOS	4	3	Poorly Differentiated	Frozen & Paraffin					26.8453	10.0368	16.8084
2 RebeccaRepeat	Br 2 LDA 11-9-09 Plate 1	G18	Z3740A1A	Invasive Carcinoma	FAT-Hs00170627_m1	1	CHTN	Missing	T3N0M0	2B	T3N0M0	0	missing	Metaplastic carcinoma with chondrosarcomatous elements	8010/3: Carcinoma, NOS	2	3	Poorly differentiated						26.9279	19.9441	6.98378	6.94796
2 RebeccaRepeat	Br 2 LDA 11-9-09 Plate 1	G17	Z3740A1A	Invasive Carcinoma	FAT-Hs00170627_m1	2	CHTN	Missing	T3N0M0	2B	T3N0M0	0	missing	Metaplastic carcinoma with chondrosarcomatous elements	8010/3: Carcinoma, NOS	2	3	Poorly differentiated						26.9922	19.9441	7.0481
2 RebeccaRepeat	Br 2 LDA 11-9-09 Plate 1	G16	Z3740A1A	Invasive Carcinoma	FAT-Hs00170627_m1	3	CHTN	Missing	T3N0M0	2B	T3N0M0	0	missing	Metaplastic carcinoma with chondrosarcomatous elements	8010/3: Carcinoma, NOS	2	3	Poorly differentiated						26.7561	19.9441	6.812
2 RebeccaRepeat	Br 2 LDA 11-9-09 Plate 1	K16	Z3841A1A	Invasive Carcinoma	FAT-Hs00170627_m1	1	CHTN	Missing	T2N0M0	2A	T2N0M0	0	missing	Invasive Ductal Carcinoma	8500/3: Infiltrating duct carcinoma, NOS	2	3	Poorly Differentiated	Frozen & Paraffin	ordered	ordered			27.9393	19.6333	8.30604	8.34593
2 RebeccaRepeat	Br 2 LDA 11-9-09 Plate 1	K18	Z3841A1A	Invasive Carcinoma	FAT-Hs00170627_m1	2	CHTN	Missing	T2N0M0	2A	T2N0M0	0	missing	Invasive Ductal Carcinoma	8500/3: Infiltrating duct carcinoma, NOS	2	3	Poorly Differentiated	Frozen & Paraffin	ordered	ordered			28.0035	19.6333	8.37026
2 RebeccaRepeat	Br 2 LDA 11-9-09 Plate 1	K17	Z3841A1A	Invasive Carcinoma	FAT-Hs00170627_m1	3	CHTN	Missing	T2N0M0	2A	T2N0M0	0	missing	Invasive Ductal Carcinoma	8500/3: Infiltrating duct carcinoma, NOS	2	3	Poorly Differentiated	Frozen & Paraffin	ordered	ordered			27.9948	19.6333	8.3615
RebeccaLast	Br 2 LDA 1-7-10 Plate 1	C17	Z4142 A1F	Invasive Carcinoma	FAT-Hs00170627_m1	1	CHTN	NA	T3N1M0	3A	T3N1M0	1	F	Invasive Ductal Carcinoma	8500/3: Infiltrating duct carcinoma, NOS	3	3	Poorly Differentiated	Frozen & Paraffin	positive/positive	positive			28.8811	13.2076	15.6735	15.694
RebeccaLast	Br 2 LDA 1-7-10 Plate 1	C18	Z4142 A1F	Invasive Carcinoma	FAT-Hs00170627_m1	2	CHTN	NA	T3N1M0	3A	T3N1M0	1	F	Invasive Ductal Carcinoma	8500/3: Infiltrating duct carcinoma, NOS	3	3	Poorly Differentiated	Frozen & Paraffin	positive/positive	positive			28.9376	13.2076	15.73
RebeccaLast	Br 2 LDA 1-7-10 Plate 1	C16	Z4142 A1F	Invasive Carcinoma	FAT-Hs00170627_m1	3	CHTN	NA	T3N1M0	3A	T3N1M0	1	F	Invasive Ductal Carcinoma	8500/3: Infiltrating duct carcinoma, NOS	3	3	Poorly Differentiated	Frozen & Paraffin	positive/positive	positive			28.8861	13.2076	15.6785
Jill	10-06-08 Samples 22-25Maricicass12-16	K14	1060163B3	normal	FAT-Hs00170627_m1	1	CHTN	65				normal				normal								24.2232	7.6645	16.5587	16.5041	15.0543	1.10194
Jill	10-06-08 Samples 22-25Maricicass12-16	K15	1060163B3	normal	FAT-Hs00170627_m1	2	CHTN	65				normal				normal								24.158	7.6645	16.4935
Jill	10-06-08 Samples 22-25Maricicass12-16	K13	1060163B3	normal	FAT-Hs00170627_m1	3	CHTN	65				normal				normal								24.1245	7.6645	16.46
Rebecca	Br 2 LDA 8-27-09 Plate 1	C18	3061119C4	normal	FAT-Hs00170627_m1	1	CHTN	74				normal	F			normal			Frozen					25.5528	10.5695	14.9832	14.9641
Rebecca	Br 2 LDA 8-27-09 Plate 1	C16	3061119C4	normal	FAT-Hs00170627_m1	2	CHTN	74				normal	F			normal			Frozen					25.6893	10.5695	15.1197
Rebecca	Br 2 LDA 8-27-09 Plate 1	C17	3061119C4	normal	FAT-Hs00170627_m1	3	CHTN	74				normal	F			normal			Frozen					25.359	10.5695	14.7894
Rebecca	Br 2 LDA 8-21-09 Plate 1	G16	3062104B6	normal	FAT-Hs00170627_m1	1	CHTN	52				normal	F			normal								24.9328	9.61416	15.3186	15.266
Rebecca	Br 2 LDA 8-21-09 Plate 1	G17	3062104B6	normal	FAT-Hs00170627_m1	2	CHTN	52				normal	F			normal								24.7598	9.61416	15.1456
Rebecca	Br 2 LDA 8-21-09 Plate 1	G18	3062104B6	normal	FAT-Hs00170627_m1	3	CHTN	52				normal	F			normal								24.9479	9.61416	15.3337
Rebecca	Br 2 LDA 8-25-09 Plate 1	K16	4060634B10	normal	FAT-Hs00170627_m1	1	CHTN	79				normal	F			normal			Frozen					25.3562	10.8951	14.461	14.4776
Rebecca	Br 2 LDA 8-25-09 Plate 1	K17	4060634B10	normal	FAT-Hs00170627_m1	2	CHTN	79				normal	F			normal			Frozen					25.4764	10.8951	14.5813
Rebecca	Br 2 LDA 8-25-09 Plate 1	K18	4060634B10	normal	FAT-Hs00170627_m1	3	CHTN	79				normal	F			normal			Frozen					25.2857	10.8951	14.3906
Rebecca	Br 2 LDA 8-25-09 Plate 1	C16	T07-081-003	normal	FAT-Hs00170627_m1	1	WVUTB	40				normal	F			normal								26.9484	10.489	16.4594	16.3864
Rebecca	Br 2 LDA 8-25-09 Plate 1	C17	T07-081-003	normal	FAT-Hs00170627_m1	2	WVUTB	40				normal	F			normal								26.7735	10.489	16.2845
Rebecca	Br 2 LDA 8-25-09 Plate 1	C18	T07-081-003	normal	FAT-Hs00170627_m1	3	WVUTB	40				normal	F			normal								26.9043	10.489	16.4153
Rebecca	Br 2 LDA 8-25-09 Plate 1	G17	T07-197-003	normal	FAT-Hs00170627_m1	1	WVUTB	43				normal	F			normal			Frozen					26.2357	10.9588	15.2768	15.3261
Rebecca	Br 2 LDA 8-25-09 Plate 1	G16	T07-197-003	normal	FAT-Hs00170627_m1	2	WVUTB	43				normal	F			normal			Frozen					26.3234	10.9588	15.3646
Rebecca	Br 2 LDA 8-25-09 Plate 1	G18	T07-197-003	normal	FAT-Hs00170627_m1	3	WVUTB	43				normal	F			normal			Frozen					26.2958	10.9588	15.3369
Rebecca	Br 2 LDA 8-27-09 Plate 1	K18	T09-045-001	normal	FAT-Hs00170627_m1	1	WVUTB	39				normal	F			normal			Frozen					24.7801	8.89414	15.8859	15.8216
Rebecca	Br 2 LDA 8-27-09 Plate 1	K16	T09-045-001	normal	FAT-Hs00170627_m1	2	WVUTB	39				normal	F			normal			Frozen					24.6479	8.89414	15.7538
Rebecca	Br 2 LDA 8-27-09 Plate 1	K17	T09-045-001	normal	FAT-Hs00170627_m1	3	WVUTB	39				normal	F			normal			Frozen					24.7194	8.89414	15.8252
Rebecca	Br 2 LDA 8-27-09 Plate 1	O16	T09-047-002	normal	FAT-Hs00170627_m1	1	WVUTB	51				normal	F			normal			Frozen					24.9076	9.98865	14.919	14.9467
Rebecca	Br 2 LDA 8-27-09 Plate 1	O18	T09-047-002	normal	FAT-Hs00170627_m1	2	WVUTB	51				normal	F			normal			Frozen					24.964	9.98865	14.9753
Rebecca	Br 2 LDA 8-27-09 Plate 1	O17	T09-047-002	normal	FAT-Hs00170627_m1	3	WVUTB	51				normal	F			normal			Frozen					24.9345	9.98865	14.9459
Rebecca	Br 2 LDA 8-27-09 Plate 1	G18	T09-064-003	normal	FAT-Hs00170627_m1	1	WVUTB	44				normal	F			normal			Frozen					24.4521	9.73424	14.7178	14.7124
Rebecca	Br 2 LDA 8-27-09 Plate 1	G17	T09-064-003	normal	FAT-Hs00170627_m1	2	WVUTB	44				normal	F			normal			Frozen					24.4236	9.73424	14.6894
Rebecca	Br 2 LDA 8-27-09 Plate 1	G16	T09-064-003	normal	FAT-Hs00170627_m1	3	WVUTB	44				normal	F			normal			Frozen					24.4643	9.73424	14.73
Rebecca	Br 2 LDA 12-8-09 Plate 1	O16	T09-089-002	normal	FAT-Hs00170627_m1	1	WVUTB	62				normal				normal			Frozen					25.8754	12.8687	13.0067	13.0573
Rebecca	Br 2 LDA 12-8-09 Plate 1	O18	T09-089-002	normal	FAT-Hs00170627_m1	2	WVUTB	62				normal				normal			Frozen					25.9435	12.8687	13.0748
Rebecca	Br 2 LDA 12-8-09 Plate 1	O17	T09-089-002	normal	FAT-Hs00170627_m1	3	WVUTB	62				normal				normal			Frozen					25.959	12.8687	13.0903
Rebecca	Br 2 LDA 12-8-09 Plate 1	C17	T09-122-002	normal	FAT-Hs00170627_m1	1	WVUTB	51				normal				normal			Frozen					24.5767	11.4183	13.1584	13.1993
Rebecca	Br 2 LDA 12-8-09 Plate 1	C16	T09-122-002	normal	FAT-Hs00170627_m1	2	WVUTB	51				normal				normal			Frozen					24.5619	11.4183	13.1436
Rebecca	Br 2 LDA 12-8-09 Plate 1	C18	T09-122-002	normal	FAT-Hs00170627_m1	3	WVUTB	51				normal				normal			Frozen					24.7144	11.4183	13.2961
Rebecca	Br 2 LDA 8-24-09 Plate 1	O18	Z3841A2A	normal	FAT-Hs00170627_m1	1	CHTN	Missing				normal	missing			normal			Frozen & Paraffin					25.8762	9.94032	15.9359	15.9897
Rebecca	Br 2 LDA 8-24-09 Plate 1	O16	Z3841A2A	normal	FAT-Hs00170627_m1	2	CHTN	Missing				normal	missing			normal			Frozen & Paraffin					25.9386	9.94032	15.9983
Rebecca	Br 2 LDA 8-24-09 Plate 1	O17	Z3841A2A	normal	FAT-Hs00170627_m1	3	CHTN	Missing				normal	missing			normal			Frozen & Paraffin					25.9752	9.94032	16.0348
2 RebeccaRepeat	Br 2 LDA 11-10-09 Plate 1	O17	1082304A4	Sarcoma	FAT-Hs00170627_m1	1	CHTN	79	T4, N0,M0	3B	T4, N0,M0	0	F	Spindle Cell Sarcoma	8801/3: Spindle cell sarcoma	3	2	Moderately Differentiated		negative/negative	negative			23.8042	5.72147	18.0827	18.0817	17.2477	1.17957	0.218639	0.195873
2 RebeccaRepeat	Br 2 LDA 11-10-09 Plate 1	O16	1082304A4	Sarcoma	FAT-Hs00170627_m1	2	CHTN	79	T4, N0,M0	3B	T4, N0,M0	0	F	Spindle Cell Sarcoma	8801/3: Spindle cell sarcoma	3	2	Moderately Differentiated		negative/negative	negative			23.8673	5.72147	18.1458
2 RebeccaRepeat	Br 2 LDA 11-10-09 Plate 1	O18	1082304A4	Sarcoma	FAT-Hs00170627_m1	3	CHTN	79	T4, N0,M0	3B	T4, N0,M0	0	F	Spindle Cell Sarcoma	8801/3: Spindle cell sarcoma	3	2	Moderately Differentiated		negative/negative	negative			23.7381	5.72147	18.0166
RebeccaRepeat	Br 2 LDA 9-29-09 Plate 1	G17	T04-104-006	Sarcoma	FAT-Hs00170627_m1	1	WVUTB	56	T4, N0, M0	1	T4, N0, M0	0	F	Recurrent Cystosarcoma Phyllodes		1	N/A	N/A	Frozen					26.4742	10.2202	16.254	16.4136
RebeccaRepeat	Br 2 LDA 9-29-09 Plate 1	G18	T04-104-006	Sarcoma	FAT-Hs00170627_m1	2	WVUTB	56	T4, N0, M0	1	T4, N0, M0	0	F	Recurrent Cystosarcoma Phyllodes		1	N/A	N/A	Frozen					26.7751	10.2202	16.5549
RebeccaRepeat	Br 2 LDA 9-29-09 Plate 1	G16	T04-104-006	Sarcoma	FAT-Hs00170627_m1	3	WVUTB	56	T4, N0, M0	1	T4, N0, M0	0	F	Recurrent Cystosarcoma Phyllodes		1	N/A	N/A	Frozen					26.6521	10.2202	16.4318
Jill	10-09-08 Samples 50-53s40-44	G16	T0426310	DCIS	FGF2-Hs00960934_m1	1	WVUTB	63		0		0		DCIS		0	3	Poorly differentiated						28.7843	8.64477	20.1395	20.2502	20.7392	0.482903	0.0971827	5.76454e-05
Jill	10-09-08 Samples 50-53s40-44	G17	T0426310	DCIS	FGF2-Hs00960934_m1	2	WVUTB	63		0		0		DCIS		0	3	Poorly differentiated						28.9188	8.64477	20.274
Jill	10-09-08 Samples 50-53s40-44	G18	T0426310	DCIS	FGF2-Hs00960934_m1	3	WVUTB	63		0		0		DCIS		0	3	Poorly differentiated						28.9819	8.64477	20.3372
Jill	10-07-08 Samples 26-29s-17-20	G16	T06449	DCIS	FGF2-Hs00960934_m1	1	WVUTB	56		0		0		DCIS		0	3	Poorly differentiated						29.6333	8.26771	21.3656	21.2158
Jill	10-07-08 Samples 26-29s-17-20	G17	T06449	DCIS	FGF2-Hs00960934_m1	2	WVUTB	56		0		0		DCIS		0	3	Poorly differentiated						29.7306	8.26771	21.4629
Jill	10-07-08 Samples 26-29s-17-20	G18	T06449	DCIS	FGF2-Hs00960934_m1	3	WVUTB	56		0		0		DCIS		0	3	Poorly differentiated						29.0866	8.26771	20.8189
2 RebeccaRepeat	Br 2 LDA 11-18-09 Plate 2	G20	T09-045-003	DCIS	FGF2-Hs00960934_m1	1	WVUTB	39	pTis, pN1mi, pMx	0	pTis, pN1mi, pMx	0	F	DCIS		0	1	Well-Differentiated	Frozen	negative / negative	not addressed			31.0851	10.5131	20.572	20.7515
2 RebeccaRepeat	Br 2 LDA 11-18-09 Plate 2	G19	T09-045-003	DCIS	FGF2-Hs00960934_m1	2	WVUTB	39	pTis, pN1mi, pMx	0	pTis, pN1mi, pMx	0	F	DCIS		0	1	Well-Differentiated	Frozen	negative / negative	not addressed			31.2076	10.5131	20.6946
2 RebeccaRepeat	Br 2 LDA 11-18-09 Plate 2	G21	T09-045-003	DCIS	FGF2-Hs00960934_m1	3	WVUTB	39	pTis, pN1mi, pMx	0	pTis, pN1mi, pMx	0	F	DCIS		0	1	Well-Differentiated	Frozen	negative / negative	not addressed			31.501	10.5131	20.9879
Jill	10-02-08 Samples 9-12	C16	1060163A9	Invasive Carcinoma	FGF2-Hs00960934_m1	1	CHTN	65	T2N0M0	2A	T2N0M0	0		invasive ductal carcinoma	8500/3: Infiltrating duct carcinoma, NOS	2	3	Poorly differentiated		negative/negative	intermediate: test to be repeated	Postmenopausal		27.2896	9.98487	17.3047	17.1555	19.7046	2.93417	0.199074	1.2543e-05
Jill	10-02-08 Samples 9-12	C17	1060163A9	Invasive Carcinoma	FGF2-Hs00960934_m1	2	CHTN	65	T2N0M0	2A	T2N0M0	0		invasive ductal carcinoma	8500/3: Infiltrating duct carcinoma, NOS	2	3	Poorly differentiated		negative/negative	intermediate: test to be repeated	Postmenopausal		27.1816	9.98487	17.1968
Jill	10-02-08 Samples 9-12	C18	1060163A9	Invasive Carcinoma	FGF2-Hs00960934_m1	3	CHTN	65	T2N0M0	2A	T2N0M0	0		invasive ductal carcinoma	8500/3: Infiltrating duct carcinoma, NOS	2	3	Poorly differentiated		negative/negative	intermediate: test to be repeated	Postmenopausal		26.9498	9.98487	16.965
RebeccaRepeat	Br 2 LDA 9-29-09 Plate 1	C20	1060568A18	Invasive Carcinoma	FGF2-Hs00960934_m1	1	CHTN	50	T4, N1, M0	3B	T4, N1, M0	1	F	Invasive ductal carcinoma	8500/3: Infiltrating duct carcinoma, NOS	3	3	Poorly differentiated		positive/negative	negative			27.5743	10.3972	17.1771	17.213
RebeccaRepeat	Br 2 LDA 9-29-09 Plate 1	C19	1060568A18	Invasive Carcinoma	FGF2-Hs00960934_m1	2	CHTN	50	T4, N1, M0	3B	T4, N1, M0	1	F	Invasive ductal carcinoma	8500/3: Infiltrating duct carcinoma, NOS	3	3	Poorly differentiated		positive/negative	negative			27.5804	10.3972	17.1832
RebeccaRepeat	Br 2 LDA 9-29-09 Plate 1	C21	1060568A18	Invasive Carcinoma	FGF2-Hs00960934_m1	3	CHTN	50	T4, N1, M0	3B	T4, N1, M0	1	F	Invasive ductal carcinoma	8500/3: Infiltrating duct carcinoma, NOS	3	3	Poorly differentiated		positive/negative	negative			27.6758	10.3972	17.2786
Jill	10-06-08 Samples 18-21s-09-12	C16	1060950A1	Invasive Carcinoma	FGF2-Hs00960934_m1	1	CHTN	63	T1cN0M0	1A	T1cN0M0	0		infiltrating ductal carcinoma, cribriform subtype	8500/3: Infiltrating duct carcinoma, NOS	1	1	Well-differentiated		positive/positive	negative			27.4886	6.92383	20.5648	20.8361
Jill	10-06-08 Samples 18-21s-09-12	C17	1060950A1	Invasive Carcinoma	FGF2-Hs00960934_m1	2	CHTN	63	T1cN0M0	1A	T1cN0M0	0		infiltrating ductal carcinoma, cribriform subtype	8500/3: Infiltrating duct carcinoma, NOS	1	1	Well-differentiated		positive/positive	negative			27.9678	6.92383	21.044
Jill	10-06-08 Samples 18-21s-09-12	C18	1060950A1	Invasive Carcinoma	FGF2-Hs00960934_m1	3	CHTN	63	T1cN0M0	1A	T1cN0M0	0		infiltrating ductal carcinoma, cribriform subtype	8500/3: Infiltrating duct carcinoma, NOS	1	1	Well-differentiated		positive/positive	negative			27.8233	6.92383	20.8994
Jill	10-06-08 Samples 13-16-s-08-09	C16	1061053A1	Invasive Carcinoma	FGF2-Hs00960934_m1	1	CHTN	36	T3N1aM0	3A	T3N1aM0	1		infiltrating ductal carcinoma	8500/3: Infiltrating duct carcinoma, NOS	3	2	Moderately differentiated		positive/positive	(+1) probably negative	Premenopausal		25.2361	6.34086	18.8952	18.6859
Jill	10-06-08 Samples 13-16-s-08-09	C17	1061053A1	Invasive Carcinoma	FGF2-Hs00960934_m1	2	CHTN	36	T3N1aM0	3A	T3N1aM0	1		infiltrating ductal carcinoma	8500/3: Infiltrating duct carcinoma, NOS	3	2	Moderately differentiated		positive/positive	(+1) probably negative	Premenopausal		24.994	6.34086	18.6531
Jill	10-06-08 Samples 13-16-s-08-09	C18	1061053A1	Invasive Carcinoma	FGF2-Hs00960934_m1	3	CHTN	36	T3N1aM0	3A	T3N1aM0	1		infiltrating ductal carcinoma	8500/3: Infiltrating duct carcinoma, NOS	3	2	Moderately differentiated		positive/positive	(+1) probably negative	Premenopausal		24.8503	6.34086	18.5095
RebeccaRepeat	Br 2 LDA 9-28-09 Plate 1	C21	1061562A15	Invasive Carcinoma	FGF2-Hs00960934_m1	1	CHTN	60	T2, N0, M0	2A	T2, N0, M0	0	F	Mucinous Adenocarcinoma	8480/3: Mucinous adenocarcinoma	2	1	Well-Differentiated	Frozen & Paraffin	positive/positive	negative			28.5531	9.96153	18.5916	18.6307
RebeccaRepeat	Br 2 LDA 9-28-09 Plate 1	C20	1061562A15	Invasive Carcinoma	FGF2-Hs00960934_m1	2	CHTN	60	T2, N0, M0	2A	T2, N0, M0	0	F	Mucinous Adenocarcinoma	8480/3: Mucinous adenocarcinoma	2	1	Well-Differentiated	Frozen & Paraffin	positive/positive	negative			28.5765	9.96153	18.615
RebeccaRepeat	Br 2 LDA 9-28-09 Plate 1	C19	1061562A15	Invasive Carcinoma	FGF2-Hs00960934_m1	3	CHTN	60	T2, N0, M0	2A	T2, N0, M0	0	F	Mucinous Adenocarcinoma	8480/3: Mucinous adenocarcinoma	2	1	Well-Differentiated	Frozen & Paraffin	positive/positive	negative			28.6471	9.96153	18.6855
Jill	10-06-08 Samples 18-21s-09-12	O16	1061897A3	Invasive Carcinoma	FGF2-Hs00960934_m1	1	CHTN	85	T2N2aM0	3A	T2N2aM0	1		invasive lobular carcinoma	8524/3: Infiltrating lobular mixed with other types of ca.	3	1	Well-differentiated		positive/positive	negative	Postmenopausal		28.7802	7.70997	21.0702	21.1281
Jill	10-06-08 Samples 18-21s-09-12	O17	1061897A3	Invasive Carcinoma	FGF2-Hs00960934_m1	2	CHTN	85	T2N2aM0	3A	T2N2aM0	1		invasive lobular carcinoma	8524/3: Infiltrating lobular mixed with other types of ca.	3	1	Well-differentiated		positive/positive	negative	Postmenopausal		28.8009	7.70997	21.0909
Jill	10-06-08 Samples 18-21s-09-12	O18	1061897A3	Invasive Carcinoma	FGF2-Hs00960934_m1	3	CHTN	85	T2N2aM0	3A	T2N2aM0	1		invasive lobular carcinoma	8524/3: Infiltrating lobular mixed with other types of ca.	3	1	Well-differentiated		positive/positive	negative	Postmenopausal		28.9332	7.70997	21.2233
RebeccaRepeat	Br 2 LDA 9-28-09 Plate 2	C19	1062323A6	Invasive Carcinoma	FGF2-Hs00960934_m1	1	CHTN	62	T2N0M0	2A	T2N0M0	0	F	Infiltrating Ductal Carcinoma	8500/3: Infiltrating duct carcinoma, NOS	2	3	Poorly Differentiated	Frozen & Paraffin	negative/negative	negative			30.4535	8.83488	21.6186	21.727
RebeccaRepeat	Br 2 LDA 9-28-09 Plate 2	C20	1062323A6	Invasive Carcinoma	FGF2-Hs00960934_m1	2	CHTN	62	T2N0M0	2A	T2N0M0	0	F	Infiltrating Ductal Carcinoma	8500/3: Infiltrating duct carcinoma, NOS	2	3	Poorly Differentiated	Frozen & Paraffin	negative/negative	negative			30.5658	8.83488	21.7309
RebeccaRepeat	Br 2 LDA 9-28-09 Plate 2	C21	1062323A6	Invasive Carcinoma	FGF2-Hs00960934_m1	3	CHTN	62	T2N0M0	2A	T2N0M0	0	F	Infiltrating Ductal Carcinoma	8500/3: Infiltrating duct carcinoma, NOS	2	3	Poorly Differentiated	Frozen & Paraffin	negative/negative	negative			30.6664	8.83488	21.8315
RebeccaRepeat	Br 2 LDA 9-28-09 Plate 1	G19	1070062A1	Invasive Carcinoma	FGF2-Hs00960934_m1	1	CHTN	49	T2N0M0	2A	T2N0M0	0	F	Ductal Adenocarcinoma	8500/3: Infiltrating duct carcinoma, NOS	2	3	Poorly differentiated		positive/positive	negative			29.4896	9.88308	19.6065	19.6808
RebeccaRepeat	Br 2 LDA 9-28-09 Plate 1	G21	1070062A1	Invasive Carcinoma	FGF2-Hs00960934_m1	2	CHTN	49	T2N0M0	2A	T2N0M0	0	F	Ductal Adenocarcinoma	8500/3: Infiltrating duct carcinoma, NOS	2	3	Poorly differentiated		positive/positive	negative			29.5754	9.88308	19.6923
RebeccaRepeat	Br 2 LDA 9-28-09 Plate 1	G20	1070062A1	Invasive Carcinoma	FGF2-Hs00960934_m1	3	CHTN	49	T2N0M0	2A	T2N0M0	0	F	Ductal Adenocarcinoma	8500/3: Infiltrating duct carcinoma, NOS	2	3	Poorly differentiated		positive/positive	negative			29.6267	9.88308	19.7436
Jill	10-06-08 Samples 22-25Maricicass12-16	O16	1070512A1	Invasive Carcinoma	FGF2-Hs00960934_m1	1	CHTN	80	T1cN0M0	1A	T1cN0M0	0		invasive ductal carcinoma	8500/3: Infiltrating duct carcinoma, NOS	1	2	Moderately differentiated		positive/positive	negative			29.3827	6.83775	22.545	22.4802
Jill	10-06-08 Samples 22-25Maricicass12-16	O17	1070512A1	Invasive Carcinoma	FGF2-Hs00960934_m1	2	CHTN	80	T1cN0M0	1A	T1cN0M0	0		invasive ductal carcinoma	8500/3: Infiltrating duct carcinoma, NOS	1	2	Moderately differentiated		positive/positive	negative			29.4626	6.83775	22.6248
Jill	10-06-08 Samples 22-25Maricicass12-16	O18	1070512A1	Invasive Carcinoma	FGF2-Hs00960934_m1	3	CHTN	80	T1cN0M0	1A	T1cN0M0	0		invasive ductal carcinoma	8500/3: Infiltrating duct carcinoma, NOS	1	2	Moderately differentiated		positive/positive	negative			29.1087	6.83775	22.2709
2 RebeccaRepeat	Br 2 LDA 11-18-09 Plate 1	O19	1072014A5	Invasive Carcinoma	FGF2-Hs00960934_m1	1	CHTN	49	T3N0M0	2B	T3N0M0	0	F	Invasive ductal carcinoma	8500/3: Infiltrating duct carcinoma, NOS	2	3	Poorly differentiated		positive/positive	positive			25.9432	5.80943	20.1338	21.0054
2 RebeccaRepeat	Br 2 LDA 11-18-09 Plate 1	O20	1072014A5	Invasive Carcinoma	FGF2-Hs00960934_m1	2	CHTN	49	T3N0M0	2B	T3N0M0	0	F	Invasive ductal carcinoma	8500/3: Infiltrating duct carcinoma, NOS	2	3	Poorly differentiated		positive/positive	positive			27.1558	5.80943	21.3464
2 RebeccaRepeat	Br 2 LDA 11-18-09 Plate 1	O21	1072014A5	Invasive Carcinoma	FGF2-Hs00960934_m1	3	CHTN	49	T3N0M0	2B	T3N0M0	0	F	Invasive ductal carcinoma	8500/3: Infiltrating duct carcinoma, NOS	2	3	Poorly differentiated		positive/positive	positive			27.3453	5.80943	21.5359
RebeccaRepeat	Br 2 LDA 9-25-09 Plate 1	C19	1080312A4	Invasive Carcinoma	FGF2-Hs00960934_m1	1	CHTN	71	T2N1M0	2B	T2N1M0	1	F	Invasive Ductal Carcinoma	8500/3: Infiltrating duct carcinoma, NOS	2	2	Moderately differentiated	Frozen& Paraffin	positive/positive	negative			29.0679	10.076	18.9919	19.1416
RebeccaRepeat	Br 2 LDA 9-25-09 Plate 1	C20	1080312A4	Invasive Carcinoma	FGF2-Hs00960934_m1	2	CHTN	71	T2N1M0	2B	T2N1M0	1	F	Invasive Ductal Carcinoma	8500/3: Infiltrating duct carcinoma, NOS	2	2	Moderately differentiated	Frozen& Paraffin	positive/positive	negative			29.2839	10.076	19.208
RebeccaRepeat	Br 2 LDA 9-25-09 Plate 1	C21	1080312A4	Invasive Carcinoma	FGF2-Hs00960934_m1	3	CHTN	71	T2N1M0	2B	T2N1M0	1	F	Invasive Ductal Carcinoma	8500/3: Infiltrating duct carcinoma, NOS	2	2	Moderately differentiated	Frozen& Paraffin	positive/positive	negative			29.3009	10.076	19.2249
2 RebeccaRepeat	Br 2 LDA 10-26-09 Plate 2 mirVana	G21	1080502A1	Invasive Carcinoma	FGF2-Hs00960934_m1	1	CHTN	42	T2N0M0	2A	T2N0M0	0	F	Invasive Ductal Carcinoma	8500/3: Infiltrating duct carcinoma, NOS	2	3	Poorly differentiated	Frozen& Paraffin	pending	pending			34.591	14.3589	20.2321	20.7455
2 RebeccaRepeat	Br 2 LDA 10-26-09 Plate 2 mirVana	G19	1080502A1	Invasive Carcinoma	FGF2-Hs00960934_m1	2	CHTN	42	T2N0M0	2A	T2N0M0	0	F	Invasive Ductal Carcinoma	8500/3: Infiltrating duct carcinoma, NOS	2	3	Poorly differentiated	Frozen& Paraffin	pending	pending			35.3098	14.3589	20.9509
2 RebeccaRepeat	Br 2 LDA 10-26-09 Plate 2 mirVana	G20	1080502A1	Invasive Carcinoma	FGF2-Hs00960934_m1	3	CHTN	42	T2N0M0	2A	T2N0M0	0	F	Invasive Ductal Carcinoma	8500/3: Infiltrating duct carcinoma, NOS	2	3	Poorly differentiated	Frozen& Paraffin	pending	pending			35.4122	14.3589	21.0533
2 RebeccaRepeat	Br 2 LDA 10-26-09 Plate 2 mirVana	C20	1080719B5	Invasive Carcinoma	FGF2-Hs00960934_m1	1	CHTN	64	T3N0M0	2B	T3N0M0	0	F	Invasive Ductal Carcinoma	8500/3: Infiltrating duct carcinoma, NOS	2	3	Poorly Differentiated	Frozen & Paraffin	ordered	ordered			31.0319	16.0027	15.0292	15.3005
2 RebeccaRepeat	Br 2 LDA 10-26-09 Plate 2 mirVana	C19	1080719B5	Invasive Carcinoma	FGF2-Hs00960934_m1	2	CHTN	64	T3N0M0	2B	T3N0M0	0	F	Invasive Ductal Carcinoma	8500/3: Infiltrating duct carcinoma, NOS	2	3	Poorly Differentiated	Frozen & Paraffin	ordered	ordered			31.3611	16.0027	15.3585
2 RebeccaRepeat	Br 2 LDA 10-26-09 Plate 2 mirVana	C21	1080719B5	Invasive Carcinoma	FGF2-Hs00960934_m1	3	CHTN	64	T3N0M0	2B	T3N0M0	0	F	Invasive Ductal Carcinoma	8500/3: Infiltrating duct carcinoma, NOS	2	3	Poorly Differentiated	Frozen & Paraffin	ordered	ordered			31.5165	16.0027	15.5138
2 RebeccaRepeat	Br 2 LDA 10-26-09 Plate 2 mirVana	K21	1081454A6	Invasive Carcinoma	FGF2-Hs00960934_m1	1	CHTN	51	T2N0M0	2A	T2N0M0	0	M	Invasive Ductal Carcinoma	8500/3: Infiltrating duct carcinoma, NOS	2	3	Poorly Differentiated	Frozen & Paraffin	positive / negative	negative			33.6486	13.9592	19.6894	19.7805
2 RebeccaRepeat	Br 2 LDA 10-26-09 Plate 2 mirVana	K20	1081454A6	Invasive Carcinoma	FGF2-Hs00960934_m1	2	CHTN	51	T2N0M0	2A	T2N0M0	0	M	Invasive Ductal Carcinoma	8500/3: Infiltrating duct carcinoma, NOS	2	3	Poorly Differentiated	Frozen & Paraffin	positive / negative	negative			33.6509	13.9592	19.6916
2 RebeccaRepeat	Br 2 LDA 10-26-09 Plate 2 mirVana	K19	1081454A6	Invasive Carcinoma	FGF2-Hs00960934_m1	3	CHTN	51	T2N0M0	2A	T2N0M0	0	M	Invasive Ductal Carcinoma	8500/3: Infiltrating duct carcinoma, NOS	2	3	Poorly Differentiated	Frozen & Paraffin	positive / negative	negative			33.9197	13.9592	19.9605
Jill	10-06-08 Samples 18-21s-09-12	G16	3061119A4	Invasive Carcinoma	FGF2-Hs00960934_m1	1	CHTN	74	T2N0M0	2A	T2N0M0	0		infiltrating ductal carcinoma with mucinous differentiation	8523/3: Infiltrating duct mixed with other types of ca.	2	1	Well-differentiated						28.1813	8.0076	20.1737	20.1001
Jill	10-06-08 Samples 18-21s-09-12	G17	3061119A4	Invasive Carcinoma	FGF2-Hs00960934_m1	2	CHTN	74	T2N0M0	2A	T2N0M0	0		infiltrating ductal carcinoma with mucinous differentiation	8523/3: Infiltrating duct mixed with other types of ca.	2	1	Well-differentiated						28.2435	8.0076	20.2359
Jill	10-06-08 Samples 18-21s-09-12	G18	3061119A4	Invasive Carcinoma	FGF2-Hs00960934_m1	3	CHTN	74	T2N0M0	2A	T2N0M0	0		infiltrating ductal carcinoma with mucinous differentiation	8523/3: Infiltrating duct mixed with other types of ca.	2	1	Well-differentiated						27.8984	8.0076	19.8908
2 RebeccaRepeat	Br 2 LDA 11-18-09 Plate 1	K19	3062104A7	Invasive Carcinoma	FGF2-Hs00960934_m1	1	CHTN	52	T2, N0, M0	2A	T2, N0, M0	0	F	Invasive ductal carcinoma	8500/3: Infiltrating duct carcinoma, NOS	2	3	Poorly Differentiated						25.2853	5.27169	20.0136	20.2752
2 RebeccaRepeat	Br 2 LDA 11-18-09 Plate 1	K20	3062104A7	Invasive Carcinoma	FGF2-Hs00960934_m1	2	CHTN	52	T2, N0, M0	2A	T2, N0, M0	0	F	Invasive ductal carcinoma	8500/3: Infiltrating duct carcinoma, NOS	2	3	Poorly Differentiated						25.5795	5.27169	20.3078
2 RebeccaRepeat	Br 2 LDA 11-18-09 Plate 1	K21	3062104A7	Invasive Carcinoma	FGF2-Hs00960934_m1	3	CHTN	52	T2, N0, M0	2A	T2, N0, M0	0	F	Invasive ductal carcinoma	8500/3: Infiltrating duct carcinoma, NOS	2	3	Poorly Differentiated						25.7757	5.27169	20.504
Jill	10-06-08 Samples 13-16-s-08-09	K16	3070617A7	Invasive Carcinoma	FGF2-Hs00960934_m1	1	CHTN	83	T3N0M0	2B	T3N0M0	0		infiltrating ductal carcinoma	8500/3: Infiltrating duct carcinoma, NOS	2	2	Moderately differentiated		positive/positive				28.727	10.0795	18.6475	18.6533
Jill	10-06-08 Samples 13-16-s-08-09	K17	3070617A7	Invasive Carcinoma	FGF2-Hs00960934_m1	2	CHTN	83	T3N0M0	2B	T3N0M0	0		infiltrating ductal carcinoma	8500/3: Infiltrating duct carcinoma, NOS	2	2	Moderately differentiated		positive/positive				28.7897	10.0795	18.7101
Jill	10-06-08 Samples 13-16-s-08-09	K18	3070617A7	Invasive Carcinoma	FGF2-Hs00960934_m1	3	CHTN	83	T3N0M0	2B	T3N0M0	0		infiltrating ductal carcinoma	8500/3: Infiltrating duct carcinoma, NOS	2	2	Moderately differentiated		positive/positive				28.6819	10.0795	18.6024
Jill	10-06-08 Samples 22-25Maricicass12-16	G16	4060634A10	Invasive Carcinoma	FGF2-Hs00960934_m1	1	CHTN	79	T2N0M0	2A	T2N0M0	0		infiltrating ductal carcinoma with foci of cartilagginous metaplasia (metaplastic carcinoma)	8523/3: Infiltrating duct mixed with other types of ca.	2	3	Poorly differentiated						26.9386	8.78822	18.1503	18.2815
Jill	10-06-08 Samples 22-25Maricicass12-16	G17	4060634A10	Invasive Carcinoma	FGF2-Hs00960934_m1	2	CHTN	79	T2N0M0	2A	T2N0M0	0		infiltrating ductal carcinoma with foci of cartilagginous metaplasia (metaplastic carcinoma)	8523/3: Infiltrating duct mixed with other types of ca.	2	3	Poorly differentiated						27.2457	8.78822	18.4575
Jill	10-06-08 Samples 22-25Maricicass12-16	G18	4060634A10	Invasive Carcinoma	FGF2-Hs00960934_m1	3	CHTN	79	T2N0M0	2A	T2N0M0	0		infiltrating ductal carcinoma with foci of cartilagginous metaplasia (metaplastic carcinoma)	8523/3: Infiltrating duct mixed with other types of ca.	2	3	Poorly differentiated						27.025	8.78822	18.2367
Jill	10-02-08 Samples 9-12	K16	4061094B24	Invasive Carcinoma	FGF2-Hs00960934_m1	1	CHTN	84	T3N1M0	3C	T3N1M0	1		infiltrating ductal carcinoma	8500/3: Infiltrating duct carcinoma, NOS	3	3	Poorly differentiated						28.1983	11.0615	17.1369	17.3035
Jill	10-02-08 Samples 9-12	K17	4061094B24	Invasive Carcinoma	FGF2-Hs00960934_m1	2	CHTN	84	T3N1M0	3C	T3N1M0	1		infiltrating ductal carcinoma	8500/3: Infiltrating duct carcinoma, NOS	3	3	Poorly differentiated						28.2788	11.0615	17.2173
Jill	10-02-08 Samples 9-12	K18	4061094B24	Invasive Carcinoma	FGF2-Hs00960934_m1	3	CHTN	84	T3N1M0	3C	T3N1M0	1		infiltrating ductal carcinoma	8500/3: Infiltrating duct carcinoma, NOS	3	3	Poorly differentiated						28.6179	11.0615	17.5564
Jill	10-02-08 Samples 9-12	O16	4061196A1	Invasive Carcinoma	FGF2-Hs00960934_m1	1	CHTN	75	T2N0M0	2A	T2N0M0	0		infiltrating lobular carcinoma with pleomorphic features and infiltrating ductal carcinoma (small component)	8524/3: Infiltrating lobular mixed with other types of ca.	2	2	Moderately differentiated						30.099	7.20059	22.8984	22.8796
Jill	10-02-08 Samples 9-12	O17	4061196A1	Invasive Carcinoma	FGF2-Hs00960934_m1	2	CHTN	75	T2N0M0	2A	T2N0M0	0		infiltrating lobular carcinoma with pleomorphic features and infiltrating ductal carcinoma (small component)	8524/3: Infiltrating lobular mixed with other types of ca.	2	2	Moderately differentiated						29.8684	7.20059	22.6678
Jill	10-02-08 Samples 9-12	O18	4061196A1	Invasive Carcinoma	FGF2-Hs00960934_m1	3	CHTN	75	T2N0M0	2A	T2N0M0	0		infiltrating lobular carcinoma with pleomorphic features and infiltrating ductal carcinoma (small component)	8524/3: Infiltrating lobular mixed with other types of ca.	2	2	Moderately differentiated						30.2732	7.20059	23.0726
Jill	10-06-08 Samples 13-16-s-08-09	O16	4070249A3	Invasive Carcinoma	FGF2-Hs00960934_m1	1	CHTN	61	T2N0M0	2A	T2N0M0	0		invasive lobular carcinoma, pleomorphic type with signet-ring cell features	8524/3: Infiltrating lobular mixed with other types of ca.	2	1	Well-differentiated						29.0371	11.885	17.1521	17.2483
Jill	10-06-08 Samples 13-16-s-08-09	O17	4070249A3	Invasive Carcinoma	FGF2-Hs00960934_m1	2	CHTN	61	T2N0M0	2A	T2N0M0	0		invasive lobular carcinoma, pleomorphic type with signet-ring cell features	8524/3: Infiltrating lobular mixed with other types of ca.	2	1	Well-differentiated						29.3483	11.885	17.4633
Jill	10-06-08 Samples 13-16-s-08-09	O18	4070249A3	Invasive Carcinoma	FGF2-Hs00960934_m1	3	CHTN	61	T2N0M0	2A	T2N0M0	0		invasive lobular carcinoma, pleomorphic type with signet-ring cell features	8524/3: Infiltrating lobular mixed with other types of ca.	2	1	Well-differentiated						29.0146	11.885	17.1297
RebeccaRepeat	Br 2 LDA 9-28-09 Plate 1	K20	4080633A6	Invasive Carcinoma	FGF2-Hs00960934_m1	1	CHTN	65	T3, N1, M0	3A	T3, N1, M0	1	F	Invasive Ductal Carcinoma	8500/3: Infiltrating duct carcinoma, NOS	3	3	Poorly Differentiated	Frozen& Paraffin					27.9271	10.7268	17.2003	17.2247
RebeccaRepeat	Br 2 LDA 9-28-09 Plate 1	K21	4080633A6	Invasive Carcinoma	FGF2-Hs00960934_m1	2	CHTN	65	T3, N1, M0	3A	T3, N1, M0	1	F	Invasive Ductal Carcinoma	8500/3: Infiltrating duct carcinoma, NOS	3	3	Poorly Differentiated	Frozen& Paraffin					27.9314	10.7268	17.2046
RebeccaRepeat	Br 2 LDA 9-28-09 Plate 1	K19	4080633A6	Invasive Carcinoma	FGF2-Hs00960934_m1	3	CHTN	65	T3, N1, M0	3A	T3, N1, M0	1	F	Invasive Ductal Carcinoma	8500/3: Infiltrating duct carcinoma, NOS	3	3	Poorly Differentiated	Frozen& Paraffin					27.996	10.7268	17.2692
RebeccaLast	Br 2 LDA 1-7-10 Plate 1	K19	T03-104	Invasive Carcinoma	FGF2-Hs00960934_m1	1	WVUTB	Missing	T3N1M0	3A	T3N1M0	1	F	Infiltrating Ductal Carcinoma	8500/3: Infiltrating duct carcinoma, NOS	3	3	Poorly differentiated	Frozen	negative/negative	negative			31.8128	14.5378	17.2751	17.4036
RebeccaLast	Br 2 LDA 1-7-10 Plate 1	K20	T03-104	Invasive Carcinoma	FGF2-Hs00960934_m1	2	WVUTB	Missing	T3N1M0	3A	T3N1M0	1	F	Infiltrating Ductal Carcinoma	8500/3: Infiltrating duct carcinoma, NOS	3	3	Poorly differentiated	Frozen	negative/negative	negative			32.2652	14.5378	17.7275
RebeccaLast	Br 2 LDA 1-7-10 Plate 1	K21	T03-104	Invasive Carcinoma	FGF2-Hs00960934_m1	3	WVUTB	Missing	T3N1M0	3A	T3N1M0	1	F	Infiltrating Ductal Carcinoma	8500/3: Infiltrating duct carcinoma, NOS	3	3	Poorly differentiated	Frozen	negative/negative	negative			31.7461	14.5378	17.2084
Jill	10-09-08 Samples 50-53s40-44	C16	T033474	Invasive Carcinoma	FGF2-Hs00960934_m1	1	WVUTB	50	I;T1,NO,MO		T1,NO,MO	0		infiltrating ductal carcinoma	8500/3: Infiltrating duct carcinoma, NOS	1	2	Moderately Differentiated						29.9558	8.56206	21.3937	21.5207
Jill	10-09-08 Samples 50-53s40-44	C17	T033474	Invasive Carcinoma	FGF2-Hs00960934_m1	2	WVUTB	50	I;T1,NO,MO		T1,NO,MO	0		infiltrating ductal carcinoma	8500/3: Infiltrating duct carcinoma, NOS	1	2	Moderately Differentiated						30.2625	8.56206	21.7005
Jill	10-09-08 Samples 50-53s40-44	C18	T033474	Invasive Carcinoma	FGF2-Hs00960934_m1	3	WVUTB	50	I;T1,NO,MO		T1,NO,MO	0		infiltrating ductal carcinoma	8500/3: Infiltrating duct carcinoma, NOS	1	2	Moderately Differentiated						30.0299	8.56206	21.4679
Jill	10-09-08 Samples 50-53s40-44	K16	T041014	Invasive Carcinoma	FGF2-Hs00960934_m1	1	WVUTB	66	IIA,T2, N0, M0		T2, N0, M0	0		invasive ductal carcinoma	8500/3: Infiltrating duct carcinoma, NOS	2	3	Poorly differentiated						24.4062	5.78564	18.6206	18.6629
Jill	10-09-08 Samples 50-53s40-44	K17	T041014	Invasive Carcinoma	FGF2-Hs00960934_m1	2	WVUTB	66	IIA,T2, N0, M0		T2, N0, M0	0		invasive ductal carcinoma	8500/3: Infiltrating duct carcinoma, NOS	2	3	Poorly differentiated						24.4676	5.78564	18.6819
Jill	10-09-08 Samples 50-53s40-44	K18	T041014	Invasive Carcinoma	FGF2-Hs00960934_m1	3	WVUTB	66	IIA,T2, N0, M0		T2, N0, M0	0		invasive ductal carcinoma	8500/3: Infiltrating duct carcinoma, NOS	2	3	Poorly differentiated						24.4719	5.78564	18.6863
2 RebeccaRepeat	Br 2 LDA 11-16-09 Plate 1	O19	T04-167-005	Invasive Carcinoma	FGF2-Hs00960934_m1	1	WVUTB	43	T2, N0, M0	2A	T2, N0, M0	0	F	Infiltrating metastatic ductal carcinoma	8500/3: Infiltrating duct carcinoma, NOS	2	3	Poorly differentiated	Frozen	positive/positive	intermediate	Pre menopausal		35.5552	10.7992	24.756	24.9699
2 RebeccaRepeat	Br 2 LDA 11-16-09 Plate 1	O20	T04-167-005	Invasive Carcinoma	FGF2-Hs00960934_m1	2	WVUTB	43	T2, N0, M0	2A	T2, N0, M0	0	F	Infiltrating metastatic ductal carcinoma	8500/3: Infiltrating duct carcinoma, NOS	2	3	Poorly differentiated	Frozen	positive/positive	intermediate	Pre menopausal		35.704	10.7992	24.9048
2 RebeccaRepeat	Br 2 LDA 11-16-09 Plate 1	O21	T04-167-005	Invasive Carcinoma	FGF2-Hs00960934_m1	3	WVUTB	43	T2, N0, M0	2A	T2, N0, M0	0	F	Infiltrating metastatic ductal carcinoma	8500/3: Infiltrating duct carcinoma, NOS	2	3	Poorly differentiated	Frozen	positive/positive	intermediate	Pre menopausal		36.0482	10.7992	25.2489
Jill	10-09-08 Samples 46-49s37-40	K16	T053774	Invasive Carcinoma	FGF2-Hs00960934_m1	1	WVUTB	59	IIA;T2,N0,M0		T2,N0,M0	0		infiltrating ductal carcinoma	8500/3: Infiltrating duct carcinoma, NOS	2	3	Poorly differentiated						28.8165	5.64001	23.1765	23.3507
Jill	10-09-08 Samples 46-49s37-40	K17	T053774	Invasive Carcinoma	FGF2-Hs00960934_m1	2	WVUTB	59	IIA;T2,N0,M0		T2,N0,M0	0		infiltrating ductal carcinoma	8500/3: Infiltrating duct carcinoma, NOS	2	3	Poorly differentiated						28.9573	5.64001	23.3173
Jill	10-09-08 Samples 46-49s37-40	K18	T053774	Invasive Carcinoma	FGF2-Hs00960934_m1	3	WVUTB	59	IIA;T2,N0,M0		T2,N0,M0	0		infiltrating ductal carcinoma	8500/3: Infiltrating duct carcinoma, NOS	2	3	Poorly differentiated						29.1983	5.64001	23.5583
Jill	10-07-08 Samples 34-37-Maricicas-27-28	C16	T053889	Invasive Carcinoma	FGF2-Hs00960934_m1	1	WVUTB	80	IIA, pT2, pN0, pM0		pT2, pN0, pM0	0		infiltrating ductal adenocarcinoma	8500/3: Infiltrating duct carcinoma, NOS	2	3	Poorly differentiated						28.9988	7.30877	21.6901	21.7194
Jill	10-07-08 Samples 34-37-Maricicas-27-28	C17	T053889	Invasive Carcinoma	FGF2-Hs00960934_m1	2	WVUTB	80	IIA, pT2, pN0, pM0		pT2, pN0, pM0	0		infiltrating ductal adenocarcinoma	8500/3: Infiltrating duct carcinoma, NOS	2	3	Poorly differentiated						29.0837	7.30877	21.7749
Jill	10-07-08 Samples 34-37-Maricicas-27-28	C18	T053889	Invasive Carcinoma	FGF2-Hs00960934_m1	3	WVUTB	80	IIA, pT2, pN0, pM0		pT2, pN0, pM0	0		infiltrating ductal adenocarcinoma	8500/3: Infiltrating duct carcinoma, NOS	2	3	Poorly differentiated						29.0022	7.30877	21.6934
Jill	10-08-08 Samples 38-41s31-32	O16	T0607908	Invasive Carcinoma	FGF2-Hs00960934_m1	1	WVUTB	46	IIA, pT2N0M0		pT2N0M0	0		papillary carcinoma	8050/3: Papillary carcinoma, NOS	2	2	Moderately differentiated						26.9489	6.56973	20.3792	20.3558
Jill	10-08-08 Samples 38-41s31-32	O17	T0607908	Invasive Carcinoma	FGF2-Hs00960934_m1	2	WVUTB	46	IIA, pT2N0M0		pT2N0M0	0		papillary carcinoma	8050/3: Papillary carcinoma, NOS	2	2	Moderately differentiated						26.8715	6.56973	20.3018
Jill	10-08-08 Samples 38-41s31-32	O18	T0607908	Invasive Carcinoma	FGF2-Hs00960934_m1	3	WVUTB	46	IIA, pT2N0M0		pT2N0M0	0		papillary carcinoma	8050/3: Papillary carcinoma, NOS	2	2	Moderately differentiated						26.9562	6.56973	20.3864
Jill	10-08-08 Samples 42-45s32-36	K16	T061324	Invasive Carcinoma	FGF2-Hs00960934_m1	1	WVUTB	55	II, pT2, pN0, pM0		pT2, pN0, pM0	0		invasive ductal adenocarcinoma, mucinous	8500/3: Infiltrating duct carcinoma, NOS	2	3	Poorly Differentiated						30.6065	6.26543	24.3411	24.1845
Jill	10-08-08 Samples 42-45s32-36	K17	T061324	Invasive Carcinoma	FGF2-Hs00960934_m1	2	WVUTB	55	II, pT2, pN0, pM0		pT2, pN0, pM0	0		invasive ductal adenocarcinoma, mucinous	8500/3: Infiltrating duct carcinoma, NOS	2	3	Poorly Differentiated						30.3937	6.26543	24.1283
Jill	10-08-08 Samples 42-45s32-36	K18	T061324	Invasive Carcinoma	FGF2-Hs00960934_m1	3	WVUTB	55	II, pT2, pN0, pM0		pT2, pN0, pM0	0		invasive ductal adenocarcinoma, mucinous	8500/3: Infiltrating duct carcinoma, NOS	2	3	Poorly Differentiated						30.3496	6.26543	24.0841
Jill	10-07-08 Samples 34-37-Maricicas-27-28	K16	T0621513	Invasive Carcinoma	FGF2-Hs00960934_m1	1	WVUTB	86	IIIB, T4, N1, M0		T4, N1, M0	1		mammary carcinoma, predominately mucinous adenocarcinoma with areas of infiltrating ductal carcinoma	8480/3: Mucinous adenocarcinoma	3	3	Poorly differentiated						27.0818	7.7534	19.3284	19.4205
Jill	10-07-08 Samples 34-37-Maricicas-27-28	K17	T0621513	Invasive Carcinoma	FGF2-Hs00960934_m1	2	WVUTB	86	IIIB, T4, N1, M0		T4, N1, M0	1		mammary carcinoma, predominately mucinous adenocarcinoma with areas of infiltrating ductal carcinoma	8480/3: Mucinous adenocarcinoma	3	3	Poorly differentiated						27.0712	7.7534	19.3178
Jill	10-07-08 Samples 34-37-Maricicas-27-28	K18	T0621513	Invasive Carcinoma	FGF2-Hs00960934_m1	3	WVUTB	86	IIIB, T4, N1, M0		T4, N1, M0	1		mammary carcinoma, predominately mucinous adenocarcinoma with areas of infiltrating ductal carcinoma	8480/3: Mucinous adenocarcinoma	3	3	Poorly differentiated						27.3688	7.7534	19.6154
Jill	10-07-08 Samples 34-37-Maricicas-27-28	O16	T0630919	Invasive Carcinoma	FGF2-Hs00960934_m1	1	WVUTB	58	I, pT1,pN0, pM0		pT1,pN0, pM0	0		invasive ductal carcinoma, mucinous carcinoma	8500/3: Infiltrating duct carcinoma, NOS	1	1	Well-differentiated						31.0707	8.44754	22.6232	22.7288
Jill	10-07-08 Samples 34-37-Maricicas-27-28	O17	T0630919	Invasive Carcinoma	FGF2-Hs00960934_m1	2	WVUTB	58	I, pT1,pN0, pM0		pT1,pN0, pM0	0		invasive ductal carcinoma, mucinous carcinoma	8500/3: Infiltrating duct carcinoma, NOS	1	1	Well-differentiated						31.3343	8.44754	22.8868
Jill	10-07-08 Samples 34-37-Maricicas-27-28	O18	T0630919	Invasive Carcinoma	FGF2-Hs00960934_m1	3	WVUTB	58	I, pT1,pN0, pM0		pT1,pN0, pM0	0		invasive ductal carcinoma, mucinous carcinoma	8500/3: Infiltrating duct carcinoma, NOS	1	1	Well-differentiated						31.124	8.44754	22.6764
RebeccaRepeat	Br 2 LDA 9-28-09 Plate 2	K21	T06-326-013	Invasive Carcinoma	FGF2-Hs00960934_m1	1	WVUTB	44	pT2, pN2a, pMx	3A	pT2, pN2a, pMx	1	F	Invasive ductal carcinoma	8500/3: Infiltrating duct carcinoma, NOS	3	3	Poorly differentiated	Frozen	Positive / Positive	negative			29.8869	9.01661	20.8703	20.8959
RebeccaRepeat	Br 2 LDA 9-28-09 Plate 2	K19	T06-326-013	Invasive Carcinoma	FGF2-Hs00960934_m1	2	WVUTB	44	pT2, pN2a, pMx	3A	pT2, pN2a, pMx	1	F	Invasive ductal carcinoma	8500/3: Infiltrating duct carcinoma, NOS	3	3	Poorly differentiated	Frozen	Positive / Positive	negative			29.9149	9.01661	20.8983
RebeccaRepeat	Br 2 LDA 9-28-09 Plate 2	K20	T06-326-013	Invasive Carcinoma	FGF2-Hs00960934_m1	3	WVUTB	44	pT2, pN2a, pMx	3A	pT2, pN2a, pMx	1	F	Invasive ductal carcinoma	8500/3: Infiltrating duct carcinoma, NOS	3	3	Poorly differentiated	Frozen	Positive / Positive	negative			29.9357	9.01661	20.9191
Jill	10-08-08 Samples 38-41s31-32	C16	T0633206	Invasive Carcinoma	FGF2-Hs00960934_m1	1	WVUTB	50	IIA, pT2, pN0, pM0		pT2, pN0, pM0	0		invasive ductal carcinoma	8500/3: Infiltrating duct carcinoma, NOS	2	1	Well-differentiated						28.8533	8.27849	20.5748	20.5851
Jill	10-08-08 Samples 38-41s31-32	C17	T0633206	Invasive Carcinoma	FGF2-Hs00960934_m1	2	WVUTB	50	IIA, pT2, pN0, pM0		pT2, pN0, pM0	0		invasive ductal carcinoma	8500/3: Infiltrating duct carcinoma, NOS	2	1	Well-differentiated						28.948	8.27849	20.6695
Jill	10-08-08 Samples 38-41s31-32	C18	T0633206	Invasive Carcinoma	FGF2-Hs00960934_m1	3	WVUTB	50	IIA, pT2, pN0, pM0		pT2, pN0, pM0	0		invasive ductal carcinoma	8500/3: Infiltrating duct carcinoma, NOS	2	1	Well-differentiated						28.7895	8.27849	20.511
Jill	10-08-08 Samples 42-45s32-36	C16	T0633418	Invasive Carcinoma	FGF2-Hs00960934_m1	1	WVUTB	50	IIIC, pT1, pN3a, pM0		pT1, pN3a, pM0	1		infiltrating ductal adenocarcinoma	8500/3: Infiltrating duct carcinoma, NOS	3	3	Poorly Differentiated						28.2248	4.40614	23.8187	24.1042
Jill	10-08-08 Samples 42-45s32-36	C17	T0633418	Invasive Carcinoma	FGF2-Hs00960934_m1	2	WVUTB	50	IIIC, pT1, pN3a, pM0		pT1, pN3a, pM0	1		infiltrating ductal adenocarcinoma	8500/3: Infiltrating duct carcinoma, NOS	3	3	Poorly Differentiated						28.9251	4.40614	24.519
Jill	10-08-08 Samples 42-45s32-36	C18	T0633418	Invasive Carcinoma	FGF2-Hs00960934_m1	3	WVUTB	50	IIIC, pT1, pN3a, pM0		pT1, pN3a, pM0	1		infiltrating ductal adenocarcinoma	8500/3: Infiltrating duct carcinoma, NOS	3	3	Poorly Differentiated						28.3811	4.40614	23.975
Jill	10-07-08 Samples 26-29s-17-20	C16	T066004	Invasive Carcinoma	FGF2-Hs00960934_m1	1	WVUTB	46	IIA, T2, N1, M0		T2, N1, M0	1		infiltrating ductal carcinoma	8500/3: Infiltrating duct carcinoma, NOS	2	3	Poorly differentiated						31.6003	8.53468	23.0657	22.927
Jill	10-07-08 Samples 26-29s-17-20	C17	T066004	Invasive Carcinoma	FGF2-Hs00960934_m1	2	WVUTB	46	IIA, T2, N1, M0		T2, N1, M0	1		infiltrating ductal carcinoma	8500/3: Infiltrating duct carcinoma, NOS	2	3	Poorly differentiated						31.521	8.53468	22.9863
Jill	10-07-08 Samples 26-29s-17-20	C18	T066004	Invasive Carcinoma	FGF2-Hs00960934_m1	3	WVUTB	46	IIA, T2, N1, M0		T2, N1, M0	1		infiltrating ductal carcinoma	8500/3: Infiltrating duct carcinoma, NOS	2	3	Poorly differentiated						31.2638	8.53468	22.7291
Jill	10-07-08 Samples 30-33s-21-24	K16	T069213	Invasive Carcinoma	FGF2-Hs00960934_m1	1	WVUTB	80	1, T1, N0, M0		T1, N0, M0	0		invasive pleomorphic lobular carcinoma	8524/3: Infiltrating lobular mixed with other types of ca.	1	3	Poorly differentiated						28.6545	7.49955	21.1549	21.4648
Jill	10-07-08 Samples 30-33s-21-24	K17	T069213	Invasive Carcinoma	FGF2-Hs00960934_m1	2	WVUTB	80	1, T1, N0, M0		T1, N0, M0	0		invasive pleomorphic lobular carcinoma	8524/3: Infiltrating lobular mixed with other types of ca.	1	3	Poorly differentiated						29.2568	7.49955	21.7572
Jill	10-07-08 Samples 30-33s-21-24	K18	T069213	Invasive Carcinoma	FGF2-Hs00960934_m1	3	WVUTB	80	1, T1, N0, M0		T1, N0, M0	0		invasive pleomorphic lobular carcinoma	8524/3: Infiltrating lobular mixed with other types of ca.	1	3	Poorly differentiated						28.9817	7.49955	21.4822
2 RebeccaRepeat	Br 2 LDA 11-10-09 Plate 1	C21	T07-086-004	Invasive Carcinoma	FGF2-Hs00960934_m1	1	WVUTB	45	pT1c, pN0(i-), pM0	1	pT1c, pN0(i-), pM0	0	F	Invasive ductal carcinoma	8500/3: Infiltrating duct carcinoma, NOS	1	3	Poorly differentiated	Frozen	positive / positive	negative			37.1476	28.6578	8.48972	9.28274
2 RebeccaRepeat	Br 2 LDA 11-10-09 Plate 1	C19	T07-086-004	Invasive Carcinoma	FGF2-Hs00960934_m1	2	WVUTB	45	pT1c, pN0(i-), pM0	1	pT1c, pN0(i-), pM0	0	F	Invasive ductal carcinoma	8500/3: Infiltrating duct carcinoma, NOS	1	3	Poorly differentiated	Frozen	positive / positive	negative			38.7336	28.6578	10.0758
2 RebeccaRepeat	Br 2 LDA 11-10-09 Plate 1	C20	T07-086-004	Invasive Carcinoma	FGF2-Hs00960934_m1	3	WVUTB	45	pT1c, pN0(i-), pM0	1	pT1c, pN0(i-), pM0	0	F	Invasive ductal carcinoma	8500/3: Infiltrating duct carcinoma, NOS	1	3	Poorly differentiated	Frozen	positive / positive	negative				28.6578
Jill	10-09-08 Samples 46-49s37-40	C16	T0714312	Invasive Carcinoma	FGF2-Hs00960934_m1	1	WVUTB	42	IIA;T2,N0,M0		T2,N0,M0	0		recurrent/residual infiltrating ductal adenocarcinoma with an extensive intraductal component	8500/3: Infiltrating duct carcinoma, NOS	2	3	Poorly differentiated						27.8754	6.7503	21.1251	20.8623
Jill	10-09-08 Samples 46-49s37-40	C17	T0714312	Invasive Carcinoma	FGF2-Hs00960934_m1	2	WVUTB	42	IIA;T2,N0,M0		T2,N0,M0	0		recurrent/residual infiltrating ductal adenocarcinoma with an extensive intraductal component	8500/3: Infiltrating duct carcinoma, NOS	2	3	Poorly differentiated						27.4128	6.7503	20.6625
Jill	10-09-08 Samples 46-49s37-40	C18	T0714312	Invasive Carcinoma	FGF2-Hs00960934_m1	3	WVUTB	42	IIA;T2,N0,M0		T2,N0,M0	0		recurrent/residual infiltrating ductal adenocarcinoma with an extensive intraductal component	8500/3: Infiltrating duct carcinoma, NOS	2	3	Poorly differentiated						27.5496	6.7503	20.7993
Jill	10-09-08 Samples 46-49s37-40	O16	T071626	Invasive Carcinoma	FGF2-Hs00960934_m1	1	WVUTB	69	IV, pT3, pN1a, pM0		pT3, pN1a, pM0	1		invasive ductal carcinoma	8500/3: Infiltrating duct carcinoma, NOS	3	3	Poorly differentiated						26.8619	6.71873	20.1431	19.9912
Jill	10-09-08 Samples 46-49s37-40	O17	T071626	Invasive Carcinoma	FGF2-Hs00960934_m1	2	WVUTB	69	IV, pT3, pN1a, pM0		pT3, pN1a, pM0	1		invasive ductal carcinoma	8500/3: Infiltrating duct carcinoma, NOS	3	3	Poorly differentiated						26.6868	6.71873	19.9681
Jill	10-09-08 Samples 46-49s37-40	O18	T071626	Invasive Carcinoma	FGF2-Hs00960934_m1	3	WVUTB	69	IV, pT3, pN1a, pM0		pT3, pN1a, pM0	1		invasive ductal carcinoma	8500/3: Infiltrating duct carcinoma, NOS	3	3	Poorly differentiated						26.5812	6.71873	19.8624
Jill	10-09-08 Samples 50-53s40-44	O16	T0717210	Invasive Carcinoma	FGF2-Hs00960934_m1	1	WVUTB	50	IIIB,pT2, pN2a, pM0		pT2, pN2a, pM0	1		invasive ductal carcinoma	8500/3: Infiltrating duct carcinoma, NOS	3	2	Moderately differentiated						30.126	7.90212	22.2239	21.8195
Jill	10-09-08 Samples 50-53s40-44	O17	T0717210	Invasive Carcinoma	FGF2-Hs00960934_m1	2	WVUTB	50	IIIB,pT2, pN2a, pM0		pT2, pN2a, pM0	1		invasive ductal carcinoma	8500/3: Infiltrating duct carcinoma, NOS	3	2	Moderately differentiated						29.6373	7.90212	21.7352
Jill	10-09-08 Samples 50-53s40-44	O18	T0717210	Invasive Carcinoma	FGF2-Hs00960934_m1	3	WVUTB	50	IIIB,pT2, pN2a, pM0		pT2, pN2a, pM0	1		invasive ductal carcinoma	8500/3: Infiltrating duct carcinoma, NOS	3	2	Moderately differentiated						29.4016	7.90212	21.4994
Jill	10-07-08 Samples 26-29s-17-20	K16	T071976	Invasive Carcinoma	FGF2-Hs00960934_m1	1	WVUTB	43	IIIA;T3,N1,M0		T3,N1,M0	1		resdiual, invasive infiltrating ductal carcinoma	8500/3: Infiltrating duct carcinoma, NOS	3	3	Poorly differentiated						24.7323	5.98754	18.7448	18.9681
Jill	10-07-08 Samples 26-29s-17-20	K17	T071976	Invasive Carcinoma	FGF2-Hs00960934_m1	2	WVUTB	43	IIIA;T3,N1,M0		T3,N1,M0	1		resdiual, invasive infiltrating ductal carcinoma	8500/3: Infiltrating duct carcinoma, NOS	3	3	Poorly differentiated						24.9901	5.98754	19.0026
Jill	10-07-08 Samples 26-29s-17-20	K18	T071976	Invasive Carcinoma	FGF2-Hs00960934_m1	3	WVUTB	43	IIIA;T3,N1,M0		T3,N1,M0	1		resdiual, invasive infiltrating ductal carcinoma	8500/3: Infiltrating duct carcinoma, NOS	3	3	Poorly differentiated						25.1446	5.98754	19.157
Jill	10-08-08 Samples 42-45s32-36	O16	T07593	Invasive Carcinoma	FGF2-Hs00960934_m1	1	WVUTB	67	IIB,pT2, pN1b, pM0		pT2, pN1b, pM0	1		invasive ductal carcinoma	8500/3: Infiltrating duct carcinoma, NOS	2	2	Moderately differentiated						24.9124	6.63636	18.276	18.05
Jill	10-08-08 Samples 42-45s32-36	O17	T07593	Invasive Carcinoma	FGF2-Hs00960934_m1	2	WVUTB	67	IIB,pT2, pN1b, pM0		pT2, pN1b, pM0	1		invasive ductal carcinoma	8500/3: Infiltrating duct carcinoma, NOS	2	2	Moderately differentiated						24.65	6.63636	18.0136
Jill	10-08-08 Samples 42-45s32-36	O18	T07593	Invasive Carcinoma	FGF2-Hs00960934_m1	3	WVUTB	67	IIB,pT2, pN1b, pM0		pT2, pN1b, pM0	1		invasive ductal carcinoma	8500/3: Infiltrating duct carcinoma, NOS	2	2	Moderately differentiated						24.4967	6.63636	17.8603
Jill	10-07-08 Samples 30-33s-21-24	G16	T07818	Invasive Carcinoma	FGF2-Hs00960934_m1	1	WVUTB	43	IIB, T2 N1 M0		T2 N1 M0	1		invasive ductal carcinoma	8500/3: Infiltrating duct carcinoma, NOS	2	3	Poorly differentiated						30.8802	9.34579	21.5344	21.6853
Jill	10-07-08 Samples 30-33s-21-24	G17	T07818	Invasive Carcinoma	FGF2-Hs00960934_m1	2	WVUTB	43	IIB, T2 N1 M0		T2 N1 M0	1		invasive ductal carcinoma	8500/3: Infiltrating duct carcinoma, NOS	2	3	Poorly differentiated						31.592	9.34579	22.2462
Jill	10-07-08 Samples 30-33s-21-24	G18	T07818	Invasive Carcinoma	FGF2-Hs00960934_m1	3	WVUTB	43	IIB, T2 N1 M0		T2 N1 M0	1		invasive ductal carcinoma	8500/3: Infiltrating duct carcinoma, NOS	2	3	Poorly differentiated						30.6211	9.34579	21.2753
RebeccaRepeat	Br 2 LDA 9-25-09 Plate 1	K20	T09-013-004	Invasive Carcinoma	FGF2-Hs00960934_m1	1	WVUTB	68	T1, N0, M0	1	T1, N0, M0	0	F	Invasive ductal carcinoma	8500/3: Infiltrating duct carcinoma, NOS	1	2	Moderately differentiated	Frozen	positive/positive	negative	Post menopausal		25.7199	9.49052	16.2294	16.3114
RebeccaRepeat	Br 2 LDA 9-25-09 Plate 1	K19	T09-013-004	Invasive Carcinoma	FGF2-Hs00960934_m1	2	WVUTB	68	T1, N0, M0	1	T1, N0, M0	0	F	Invasive ductal carcinoma	8500/3: Infiltrating duct carcinoma, NOS	1	2	Moderately differentiated	Frozen	positive/positive	negative	Post menopausal		25.7578	9.49052	16.2673
RebeccaRepeat	Br 2 LDA 9-25-09 Plate 1	K21	T09-013-004	Invasive Carcinoma	FGF2-Hs00960934_m1	3	WVUTB	68	T1, N0, M0	1	T1, N0, M0	0	F	Invasive ductal carcinoma	8500/3: Infiltrating duct carcinoma, NOS	1	2	Moderately differentiated	Frozen	positive/positive	negative	Post menopausal		25.9281	9.49052	16.4376
RebeccaRepeat	Br 2 LDA 9-28-09 Plate 2	G19	T09-023-003	Invasive Carcinoma	FGF2-Hs00960934_m1	1	WVUTB	56	pT1c, pN0(i-), pM0	1	pT1c, pN0(i-), pM0	0	F	Invasive ductal adenocarcinoma	8500/3: Infiltrating duct carcinoma, NOS	1	2	Moderately differentiated	Frozen	positive/positive	positive	Post menopausal		30.3976	11.0381	19.3595	19.429
RebeccaRepeat	Br 2 LDA 9-28-09 Plate 2	G21	T09-023-003	Invasive Carcinoma	FGF2-Hs00960934_m1	2	WVUTB	56	pT1c, pN0(i-), pM0	1	pT1c, pN0(i-), pM0	0	F	Invasive ductal adenocarcinoma	8500/3: Infiltrating duct carcinoma, NOS	1	2	Moderately differentiated	Frozen	positive/positive	positive	Post menopausal		30.4341	11.0381	19.3959
RebeccaRepeat	Br 2 LDA 9-28-09 Plate 2	G20	T09-023-003	Invasive Carcinoma	FGF2-Hs00960934_m1	3	WVUTB	56	pT1c, pN0(i-), pM0	1	pT1c, pN0(i-), pM0	0	F	Invasive ductal adenocarcinoma	8500/3: Infiltrating duct carcinoma, NOS	1	2	Moderately differentiated	Frozen	positive/positive	positive	Post menopausal		30.5698	11.0381	19.5316
RebeccaRepeat	Br 2 LDA 9-28-09 Plate 2	O21	T09-034-002	Invasive Carcinoma	FGF2-Hs00960934_m1	1	WVUTB	51	pT1c, pN0, pM0	1	pT1c, pN0, pM0	0	F	Invasive lobular carcinoma	8524/3: Infiltrating lobular mixed with other types of ca.	1	2	Moderately differentiated	Frozen	positive/positive	negative	perimenopausal		29.7382	10.7996	18.9386	19.0342
RebeccaRepeat	Br 2 LDA 9-28-09 Plate 2	O19	T09-034-002	Invasive Carcinoma	FGF2-Hs00960934_m1	2	WVUTB	51	pT1c, pN0, pM0	1	pT1c, pN0, pM0	0	F	Invasive lobular carcinoma	8524/3: Infiltrating lobular mixed with other types of ca.	1	2	Moderately differentiated	Frozen	positive/positive	negative	perimenopausal		29.8453	10.7996	19.0457
RebeccaRepeat	Br 2 LDA 9-28-09 Plate 2	O20	T09-034-002	Invasive Carcinoma	FGF2-Hs00960934_m1	3	WVUTB	51	pT1c, pN0, pM0	1	pT1c, pN0, pM0	0	F	Invasive lobular carcinoma	8524/3: Infiltrating lobular mixed with other types of ca.	1	2	Moderately differentiated	Frozen	positive/positive	negative	perimenopausal		29.9179	10.7996	19.1183
2 RebeccaRepeat	Br 2 LDA 11-16-09 Plate 1	K19	T09-035-001	Invasive Carcinoma	FGF2-Hs00960934_m1	1	WVUTB	78	pT2, pN0(i-), pM0	2A	pT2, pN0(i-), pM0	0	F	Invasive lobular carcinoma	8524/3: Infiltrating lobular mixed with other types of ca.	2	2	Moderately differentiated	Frozen	positive/negative	negative	Post menopausal			29.0066
2 RebeccaRepeat	Br 2 LDA 11-16-09 Plate 1	K20	T09-035-001	Invasive Carcinoma	FGF2-Hs00960934_m1	2	WVUTB	78	pT2, pN0(i-), pM0	2A	pT2, pN0(i-), pM0	0	F	Invasive lobular carcinoma	8524/3: Infiltrating lobular mixed with other types of ca.	2	2	Moderately differentiated	Frozen	positive/negative	negative	Post menopausal			29.0066
2 RebeccaRepeat	Br 2 LDA 11-16-09 Plate 1	K21	T09-035-001	Invasive Carcinoma	FGF2-Hs00960934_m1	3	WVUTB	78	pT2, pN0(i-), pM0	2A	pT2, pN0(i-), pM0	0	F	Invasive lobular carcinoma	8524/3: Infiltrating lobular mixed with other types of ca.	2	2	Moderately differentiated	Frozen	positive/negative	negative	Post menopausal			29.0066
2 RebeccaRepeat	Br 2 LDA 11-18-09 Plate 2	C19	T09-047-003	Invasive Carcinoma	FGF2-Hs00960934_m1	1	WVUTB	51	pT1c pN0(i-),pM0	1A	pT1c pN0(i-),pM0	0	F	Mucinous carcinoma	8480/3: Mucinous adenocarcinoma	1	2	Moderately differentiated	Frozen	positive/positive	negative			28.5376	9.77874	18.7588	18.8183
2 RebeccaRepeat	Br 2 LDA 11-18-09 Plate 2	C21	T09-047-003	Invasive Carcinoma	FGF2-Hs00960934_m1	2	WVUTB	51	pT1c pN0(i-),pM0	1A	pT1c pN0(i-),pM0	0	F	Mucinous carcinoma	8480/3: Mucinous adenocarcinoma	1	2	Moderately differentiated	Frozen	positive/positive	negative			28.6263	9.77874	18.8476
2 RebeccaRepeat	Br 2 LDA 11-18-09 Plate 2	C20	T09-047-003	Invasive Carcinoma	FGF2-Hs00960934_m1	3	WVUTB	51	pT1c pN0(i-),pM0	1A	pT1c pN0(i-),pM0	0	F	Mucinous carcinoma	8480/3: Mucinous adenocarcinoma	1	2	Moderately differentiated	Frozen	positive/positive	negative			28.6273	9.77874	18.8486
2 RebeccaRepeat	Br 2 LDA 11-18-09 Plate 2	K21	T09-064-001	Invasive Carcinoma	FGF2-Hs00960934_m1	1	WVUTB	44	pT1c, N1a, M0	2A	pT1c, N1a, M0	1	F	Invasive ductal carcinoma	8500/3: Infiltrating duct carcinoma, NOS	2	2	Moderately differentiated	Frozen	positive/positive	negative	Pre menopausal		29.9881	10.4652	19.5229	19.7617
2 RebeccaRepeat	Br 2 LDA 11-18-09 Plate 2	K20	T09-064-001	Invasive Carcinoma	FGF2-Hs00960934_m1	2	WVUTB	44	pT1c, N1a, M0	2A	pT1c, N1a, M0	1	F	Invasive ductal carcinoma	8500/3: Infiltrating duct carcinoma, NOS	2	2	Moderately differentiated	Frozen	positive/positive	negative	Pre menopausal		30.1917	10.4652	19.7264
2 RebeccaRepeat	Br 2 LDA 11-18-09 Plate 2	K19	T09-064-001	Invasive Carcinoma	FGF2-Hs00960934_m1	3	WVUTB	44	pT1c, N1a, M0	2A	pT1c, N1a, M0	1	F	Invasive ductal carcinoma	8500/3: Infiltrating duct carcinoma, NOS	2	2	Moderately differentiated	Frozen	positive/positive	negative	Pre menopausal		30.501	10.4652	20.0358
RebeccaRepeat	Br 2 LDA 9-28-09 Plate 1	O20	T09-089-001	Invasive Carcinoma	FGF2-Hs00960934_m1	1	WVUTB	62	pT1c, N0, M0	1A	pT1c, N0, M0	0	F	Residual infiltrating ductal carcinoma	8500/3: Infiltrating duct carcinoma, NOS	1	2	Moderately differentiated	Frozen	positive/negative	positive			27.6174	10.9515	16.6659	16.7031
RebeccaRepeat	Br 2 LDA 9-28-09 Plate 1	O19	T09-089-001	Invasive Carcinoma	FGF2-Hs00960934_m1	2	WVUTB	62	pT1c, N0, M0	1A	pT1c, N0, M0	0	F	Residual infiltrating ductal carcinoma	8500/3: Infiltrating duct carcinoma, NOS	1	2	Moderately differentiated	Frozen	positive/negative	positive			27.6348	10.9515	16.6833
RebeccaRepeat	Br 2 LDA 9-28-09 Plate 1	O21	T09-089-001	Invasive Carcinoma	FGF2-Hs00960934_m1	3	WVUTB	62	pT1c, N0, M0	1A	pT1c, N0, M0	0	F	Residual infiltrating ductal carcinoma	8500/3: Infiltrating duct carcinoma, NOS	1	2	Moderately differentiated	Frozen	positive/negative	positive			27.7116	10.9515	16.7601
Rebecca	Br 2 LDA 12-7-09 Plate 1	K19	T09-122-007	Invasive Carcinoma	FGF2-Hs00960934_m1	1	WVUTB	51	T2,N0,M0	2A	T2,N0,M0	0	F	Infiltrating Ductal Carcinoma	8500/3: Infiltrating duct carcinoma, NOS	2	3	Poorly Differentiated	Frozen	positive/positive	positive			31.3296	9.32693	22.0027	21.8871
Rebecca	Br 2 LDA 12-7-09 Plate 1	K20	T09-122-007	Invasive Carcinoma	FGF2-Hs00960934_m1	2	WVUTB	51	T2,N0,M0	2A	T2,N0,M0	0	F	Infiltrating Ductal Carcinoma	8500/3: Infiltrating duct carcinoma, NOS	2	3	Poorly Differentiated	Frozen	positive/positive	positive			31.1903	9.32693	21.8634
Rebecca	Br 2 LDA 12-7-09 Plate 1	K21	T09-122-007	Invasive Carcinoma	FGF2-Hs00960934_m1	3	WVUTB	51	T2,N0,M0	2A	T2,N0,M0	0	F	Infiltrating Ductal Carcinoma	8500/3: Infiltrating duct carcinoma, NOS	2	3	Poorly Differentiated	Frozen	positive/positive	positive			31.1221	9.32693	21.7952
2 RebeccaRepeat	Br 2 LDA 11-18-09 Plate 2	O21	T09-138-002	Invasive Carcinoma	FGF2-Hs00960934_m1	1	WVUTB	70	T2pN0M0	2A	T2pN0M0	0	F	Infiltrating Ductal Carcinoma	8500/3: Infiltrating duct carcinoma, NOS	2	3	Poorly Differentiated	Frozen	negative/negative	negative	Post menopausal		28.9243	8.82736	20.0969	20.1458
2 RebeccaRepeat	Br 2 LDA 11-18-09 Plate 2	O19	T09-138-002	Invasive Carcinoma	FGF2-Hs00960934_m1	2	WVUTB	70	T2pN0M0	2A	T2pN0M0	0	F	Infiltrating Ductal Carcinoma	8500/3: Infiltrating duct carcinoma, NOS	2	3	Poorly Differentiated	Frozen	negative/negative	negative	Post menopausal		28.9779	8.82736	20.1505
2 RebeccaRepeat	Br 2 LDA 11-18-09 Plate 2	O20	T09-138-002	Invasive Carcinoma	FGF2-Hs00960934_m1	3	WVUTB	70	T2pN0M0	2A	T2pN0M0	0	F	Infiltrating Ductal Carcinoma	8500/3: Infiltrating duct carcinoma, NOS	2	3	Poorly Differentiated	Frozen	negative/negative	negative	Post menopausal		29.0173	8.82736	20.19
Rebecca	Br 2 LDA 12-7-09 Plate 1	O19	T09-141-002	Invasive Carcinoma	FGF2-Hs00960934_m1	1	WVUTB	75	pT2pN1aM0	2B	pT2pN1aM0	1	F	Invasive ductal carcinoma	8500/3: Infiltrating duct carcinoma, NOS	2	3	Poorly Differentiated	Frozen	negative/negative	negative	Post menopausal		30.5067	8.92162	21.5851	21.6736
Rebecca	Br 2 LDA 12-7-09 Plate 1	O20	T09-141-002	Invasive Carcinoma	FGF2-Hs00960934_m1	2	WVUTB	75	pT2pN1aM0	2B	pT2pN1aM0	1	F	Invasive ductal carcinoma	8500/3: Infiltrating duct carcinoma, NOS	2	3	Poorly Differentiated	Frozen	negative/negative	negative	Post menopausal		30.9329	8.92162	22.0113
Rebecca	Br 2 LDA 12-7-09 Plate 1	O21	T09-141-002	Invasive Carcinoma	FGF2-Hs00960934_m1	3	WVUTB	75	pT2pN1aM0	2B	pT2pN1aM0	1	F	Invasive ductal carcinoma	8500/3: Infiltrating duct carcinoma, NOS	2	3	Poorly Differentiated	Frozen	negative/negative	negative	Post menopausal		30.3459	8.92162	21.4243
Rebecca	Br 2 LDA 12-7-09 Plate 1	G19	T09-142-003	Invasive Carcinoma	FGF2-Hs00960934_m1	1	WVUTB	37	pT2N3aM0	3C	pT2N3aM0	1	F	Infiltrating Ductal Carcinoma	8500/3: Infiltrating duct carcinoma, NOS	3	3	Poorly Differentiated	Frozen	negative/negative	negative			29.6507	9.15739	20.4933	20.6122
Rebecca	Br 2 LDA 12-7-09 Plate 1	G20	T09-142-003	Invasive Carcinoma	FGF2-Hs00960934_m1	2	WVUTB	37	pT2N3aM0	3C	pT2N3aM0	1	F	Infiltrating Ductal Carcinoma	8500/3: Infiltrating duct carcinoma, NOS	3	3	Poorly Differentiated	Frozen	negative/negative	negative			29.9238	9.15739	20.7664
Rebecca	Br 2 LDA 12-7-09 Plate 1	G21	T09-142-003	Invasive Carcinoma	FGF2-Hs00960934_m1	3	WVUTB	37	pT2N3aM0	3C	pT2N3aM0	1	F	Infiltrating Ductal Carcinoma	8500/3: Infiltrating duct carcinoma, NOS	3	3	Poorly Differentiated	Frozen	negative/negative	negative			29.7344	9.15739	20.577
Rebecca	Br 2 LDA 12-7-09 Plate 1	C19	T09-150-004	Invasive Carcinoma	FGF2-Hs00960934_m1	1	WVUTB	82	pT2N1aM0	2B	pT2N1aM0	1	F	Invasive Ductal Carcinoma	8500/3: Infiltrating duct carcinoma, NOS	2	2	Moderately Differentiated	Frozen	positive/positive	negative	Post menopausal		30.8578	10.3239	20.5338	20.3735
Rebecca	Br 2 LDA 12-7-09 Plate 1	C20	T09-150-004	Invasive Carcinoma	FGF2-Hs00960934_m1	2	WVUTB	82	pT2N1aM0	2B	pT2N1aM0	1	F	Invasive Ductal Carcinoma	8500/3: Infiltrating duct carcinoma, NOS	2	2	Moderately Differentiated	Frozen	positive/positive	negative	Post menopausal		30.4705	10.3239	20.1465
Rebecca	Br 2 LDA 12-7-09 Plate 1	C21	T09-150-004	Invasive Carcinoma	FGF2-Hs00960934_m1	3	WVUTB	82	pT2N1aM0	2B	pT2N1aM0	1	F	Invasive Ductal Carcinoma	8500/3: Infiltrating duct carcinoma, NOS	2	2	Moderately Differentiated	Frozen	positive/positive	negative	Post menopausal		30.7641	10.3239	20.4402
RebeccaRepeat	Br 2 LDA 9-25-09 Plate 1	O20	Z3588A1B	Invasive Carcinoma	FGF2-Hs00960934_m1	1	CHTN	NA	pT3, pN1, M1	4	pT3, pN1, M1	1	missing	Invasive Ductal Carcinoma	8500/3: Infiltrating duct carcinoma, NOS	4	3	Poorly Differentiated	Frozen & Paraffin					31.3479	10.0368	21.3111	21.5777
RebeccaRepeat	Br 2 LDA 9-25-09 Plate 1	O19	Z3588A1B	Invasive Carcinoma	FGF2-Hs00960934_m1	2	CHTN	NA	pT3, pN1, M1	4	pT3, pN1, M1	1	missing	Invasive Ductal Carcinoma	8500/3: Infiltrating duct carcinoma, NOS	4	3	Poorly Differentiated	Frozen & Paraffin					31.5846	10.0368	21.5477
RebeccaRepeat	Br 2 LDA 9-25-09 Plate 1	O21	Z3588A1B	Invasive Carcinoma	FGF2-Hs00960934_m1	3	CHTN	NA	pT3, pN1, M1	4	pT3, pN1, M1	1	missing	Invasive Ductal Carcinoma	8500/3: Infiltrating duct carcinoma, NOS	4	3	Poorly Differentiated	Frozen & Paraffin					31.911	10.0368	21.8741
2 RebeccaRepeat	Br 2 LDA 11-9-09 Plate 1	G21	Z3740A1A	Invasive Carcinoma	FGF2-Hs00960934_m1	1	CHTN	Missing	T3N0M0	2B	T3N0M0	0	missing	Metaplastic carcinoma with chondrosarcomatous elements	8010/3: Carcinoma, NOS	2	3	Poorly differentiated						33.7912	19.9441	13.847	14.3596
2 RebeccaRepeat	Br 2 LDA 11-9-09 Plate 1	G20	Z3740A1A	Invasive Carcinoma	FGF2-Hs00960934_m1	2	CHTN	Missing	T3N0M0	2B	T3N0M0	0	missing	Metaplastic carcinoma with chondrosarcomatous elements	8010/3: Carcinoma, NOS	2	3	Poorly differentiated						33.8831	19.9441	13.939
2 RebeccaRepeat	Br 2 LDA 11-9-09 Plate 1	G19	Z3740A1A	Invasive Carcinoma	FGF2-Hs00960934_m1	3	CHTN	Missing	T3N0M0	2B	T3N0M0	0	missing	Metaplastic carcinoma with chondrosarcomatous elements	8010/3: Carcinoma, NOS	2	3	Poorly differentiated						35.237	19.9441	15.2928
2 RebeccaRepeat	Br 2 LDA 11-9-09 Plate 1	K21	Z3841A1A	Invasive Carcinoma	FGF2-Hs00960934_m1	1	CHTN	Missing	T2N0M0	2A	T2N0M0	0	missing	Invasive Ductal Carcinoma	8500/3: Infiltrating duct carcinoma, NOS	2	3	Poorly Differentiated	Frozen & Paraffin	ordered	ordered			29.0547	19.6333	9.42139	9.46954
2 RebeccaRepeat	Br 2 LDA 11-9-09 Plate 1	K19	Z3841A1A	Invasive Carcinoma	FGF2-Hs00960934_m1	2	CHTN	Missing	T2N0M0	2A	T2N0M0	0	missing	Invasive Ductal Carcinoma	8500/3: Infiltrating duct carcinoma, NOS	2	3	Poorly Differentiated	Frozen & Paraffin	ordered	ordered			29.0764	19.6333	9.44312
2 RebeccaRepeat	Br 2 LDA 11-9-09 Plate 1	K20	Z3841A1A	Invasive Carcinoma	FGF2-Hs00960934_m1	3	CHTN	Missing	T2N0M0	2A	T2N0M0	0	missing	Invasive Ductal Carcinoma	8500/3: Infiltrating duct carcinoma, NOS	2	3	Poorly Differentiated	Frozen & Paraffin	ordered	ordered			29.1774	19.6333	9.54412
RebeccaLast	Br 2 LDA 1-7-10 Plate 1	C19	Z4142 A1F	Invasive Carcinoma	FGF2-Hs00960934_m1	1	CHTN	NA	T3N1M0	3A	T3N1M0	1	F	Invasive Ductal Carcinoma	8500/3: Infiltrating duct carcinoma, NOS	3	3	Poorly Differentiated	Frozen & Paraffin	positive/positive	positive			35.8534	13.2076	22.6458	21.9871
RebeccaLast	Br 2 LDA 1-7-10 Plate 1	C20	Z4142 A1F	Invasive Carcinoma	FGF2-Hs00960934_m1	2	CHTN	NA	T3N1M0	3A	T3N1M0	1	F	Invasive Ductal Carcinoma	8500/3: Infiltrating duct carcinoma, NOS	3	3	Poorly Differentiated	Frozen & Paraffin	positive/positive	positive			34.9246	13.2076	21.717
RebeccaLast	Br 2 LDA 1-7-10 Plate 1	C21	Z4142 A1F	Invasive Carcinoma	FGF2-Hs00960934_m1	3	CHTN	NA	T3N1M0	3A	T3N1M0	1	F	Invasive Ductal Carcinoma	8500/3: Infiltrating duct carcinoma, NOS	3	3	Poorly Differentiated	Frozen & Paraffin	positive/positive	positive			34.8062	13.2076	21.5986
Jill	10-06-08 Samples 22-25Maricicass12-16	K16	1060163B3	normal	FGF2-Hs00960934_m1	1	CHTN	65				normal				normal								26.5726	7.6645	18.9081	19.0571	17.376	1.01809
Jill	10-06-08 Samples 22-25Maricicass12-16	K17	1060163B3	normal	FGF2-Hs00960934_m1	2	CHTN	65				normal				normal								26.7577	7.6645	19.0932
Jill	10-06-08 Samples 22-25Maricicass12-16	K18	1060163B3	normal	FGF2-Hs00960934_m1	3	CHTN	65				normal				normal								26.8345	7.6645	19.17
Rebecca	Br 2 LDA 8-27-09 Plate 1	C21	3061119C4	normal	FGF2-Hs00960934_m1	1	CHTN	74				normal	F			normal			Frozen					26.9065	10.5695	16.3369	16.4229
Rebecca	Br 2 LDA 8-27-09 Plate 1	C19	3061119C4	normal	FGF2-Hs00960934_m1	2	CHTN	74				normal	F			normal			Frozen					26.999	10.5695	16.4295
Rebecca	Br 2 LDA 8-27-09 Plate 1	C20	3061119C4	normal	FGF2-Hs00960934_m1	3	CHTN	74				normal	F			normal			Frozen					27.0719	10.5695	16.5023
Rebecca	Br 2 LDA 8-21-09 Plate 1	G20	3062104B6	normal	FGF2-Hs00960934_m1	1	CHTN	52				normal	F			normal								27.0834	9.61416	17.4692	17.5323
Rebecca	Br 2 LDA 8-21-09 Plate 1	G19	3062104B6	normal	FGF2-Hs00960934_m1	2	CHTN	52				normal	F			normal								27.126	9.61416	17.5119
Rebecca	Br 2 LDA 8-21-09 Plate 1	G21	3062104B6	normal	FGF2-Hs00960934_m1	3	CHTN	52				normal	F			normal								27.2299	9.61416	17.6158
Rebecca	Br 2 LDA 8-25-09 Plate 1	K21	4060634B10	normal	FGF2-Hs00960934_m1	1	CHTN	79				normal	F			normal			Frozen					27.3497	10.8951	16.4545	16.5367
Rebecca	Br 2 LDA 8-25-09 Plate 1	K20	4060634B10	normal	FGF2-Hs00960934_m1	2	CHTN	79				normal	F			normal			Frozen					27.4069	10.8951	16.5117
Rebecca	Br 2 LDA 8-25-09 Plate 1	K19	4060634B10	normal	FGF2-Hs00960934_m1	3	CHTN	79				normal	F			normal			Frozen					27.539	10.8951	16.6438
Rebecca	Br 2 LDA 8-25-09 Plate 1	C19	T07-081-003	normal	FGF2-Hs00960934_m1	1	WVUTB	40				normal	F			normal								28.2073	10.489	17.7183	17.7952
Rebecca	Br 2 LDA 8-25-09 Plate 1	C20	T07-081-003	normal	FGF2-Hs00960934_m1	2	WVUTB	40				normal	F			normal								28.2448	10.489	17.7558
Rebecca	Br 2 LDA 8-25-09 Plate 1	C21	T07-081-003	normal	FGF2-Hs00960934_m1	3	WVUTB	40				normal	F			normal								28.4005	10.489	17.9115
Rebecca	Br 2 LDA 8-25-09 Plate 1	G19	T07-197-003	normal	FGF2-Hs00960934_m1	1	WVUTB	43				normal	F			normal			Frozen					29.7176	10.9588	18.7588	18.8499
Rebecca	Br 2 LDA 8-25-09 Plate 1	G20	T07-197-003	normal	FGF2-Hs00960934_m1	2	WVUTB	43				normal	F			normal			Frozen					29.7941	10.9588	18.8352
Rebecca	Br 2 LDA 8-25-09 Plate 1	G21	T07-197-003	normal	FGF2-Hs00960934_m1	3	WVUTB	43				normal	F			normal			Frozen					29.9145	10.9588	18.9557
Rebecca	Br 2 LDA 8-27-09 Plate 1	K20	T09-045-001	normal	FGF2-Hs00960934_m1	1	WVUTB	39				normal	F			normal			Frozen					27.1417	8.89414	18.2476	18.3753
Rebecca	Br 2 LDA 8-27-09 Plate 1	K19	T09-045-001	normal	FGF2-Hs00960934_m1	2	WVUTB	39				normal	F			normal			Frozen					27.3127	8.89414	18.4186
Rebecca	Br 2 LDA 8-27-09 Plate 1	K21	T09-045-001	normal	FGF2-Hs00960934_m1	3	WVUTB	39				normal	F			normal			Frozen					27.3538	8.89414	18.4596
Rebecca	Br 2 LDA 8-27-09 Plate 1	O21	T09-047-002	normal	FGF2-Hs00960934_m1	1	WVUTB	51				normal	F			normal			Frozen					26.5393	9.98865	16.5507	16.7734
Rebecca	Br 2 LDA 8-27-09 Plate 1	O20	T09-047-002	normal	FGF2-Hs00960934_m1	2	WVUTB	51				normal	F			normal			Frozen					26.8089	9.98865	16.8202
Rebecca	Br 2 LDA 8-27-09 Plate 1	O19	T09-047-002	normal	FGF2-Hs00960934_m1	3	WVUTB	51				normal	F			normal			Frozen					26.9378	9.98865	16.9492
Rebecca	Br 2 LDA 8-27-09 Plate 1	G19	T09-064-003	normal	FGF2-Hs00960934_m1	1	WVUTB	44				normal	F			normal			Frozen					27.4964	9.73424	17.7621	17.8382
Rebecca	Br 2 LDA 8-27-09 Plate 1	G20	T09-064-003	normal	FGF2-Hs00960934_m1	2	WVUTB	44				normal	F			normal			Frozen					27.5388	9.73424	17.8046
Rebecca	Br 2 LDA 8-27-09 Plate 1	G21	T09-064-003	normal	FGF2-Hs00960934_m1	3	WVUTB	44				normal	F			normal			Frozen					27.6821	9.73424	17.9479
Rebecca	Br 2 LDA 12-8-09 Plate 1	O19	T09-089-002	normal	FGF2-Hs00960934_m1	1	WVUTB	62				normal				normal			Frozen					29.9484	12.8687	17.0797	16.9107
Rebecca	Br 2 LDA 12-8-09 Plate 1	O20	T09-089-002	normal	FGF2-Hs00960934_m1	2	WVUTB	62				normal				normal			Frozen					29.9115	12.8687	17.0427
Rebecca	Br 2 LDA 12-8-09 Plate 1	O21	T09-089-002	normal	FGF2-Hs00960934_m1	3	WVUTB	62				normal				normal			Frozen					29.4783	12.8687	16.6096
Rebecca	Br 2 LDA 12-8-09 Plate 1	C19	T09-122-002	normal	FGF2-Hs00960934_m1	1	WVUTB	51				normal				normal			Frozen					27.8751	11.4183	16.4568	16.4116
Rebecca	Br 2 LDA 12-8-09 Plate 1	C20	T09-122-002	normal	FGF2-Hs00960934_m1	2	WVUTB	51				normal				normal			Frozen					27.8655	11.4183	16.4472
Rebecca	Br 2 LDA 12-8-09 Plate 1	C21	T09-122-002	normal	FGF2-Hs00960934_m1	3	WVUTB	51				normal				normal			Frozen					27.7493	11.4183	16.3309
Rebecca	Br 2 LDA 8-24-09 Plate 1	O21	Z3841A2A	normal	FGF2-Hs00960934_m1	1	CHTN	Missing				normal	missing			normal			Frozen & Paraffin					25.9368	9.94032	15.9965	16.0091
Rebecca	Br 2 LDA 8-24-09 Plate 1	O20	Z3841A2A	normal	FGF2-Hs00960934_m1	2	CHTN	Missing				normal	missing			normal			Frozen & Paraffin					25.9386	9.94032	15.9983
Rebecca	Br 2 LDA 8-24-09 Plate 1	O19	Z3841A2A	normal	FGF2-Hs00960934_m1	3	CHTN	Missing				normal	missing			normal			Frozen & Paraffin					25.973	9.94032	16.0327
2 RebeccaRepeat	Br 2 LDA 11-10-09 Plate 1	O20	1082304A4	Sarcoma	FGF2-Hs00960934_m1	1	CHTN	79	T4, N0,M0	3B	T4, N0,M0	0	F	Spindle Cell Sarcoma	8801/3: Spindle cell sarcoma	3	2	Moderately Differentiated		negative/negative	negative			28.5526	5.72147	22.8311	22.9662	21.4687	2.11782	0.0586127	0.21235
2 RebeccaRepeat	Br 2 LDA 11-10-09 Plate 1	O19	1082304A4	Sarcoma	FGF2-Hs00960934_m1	2	CHTN	79	T4, N0,M0	3B	T4, N0,M0	0	F	Spindle Cell Sarcoma	8801/3: Spindle cell sarcoma	3	2	Moderately Differentiated		negative/negative	negative			28.6952	5.72147	22.9737
2 RebeccaRepeat	Br 2 LDA 11-10-09 Plate 1	O21	1082304A4	Sarcoma	FGF2-Hs00960934_m1	3	CHTN	79	T4, N0,M0	3B	T4, N0,M0	0	F	Spindle Cell Sarcoma	8801/3: Spindle cell sarcoma	3	2	Moderately Differentiated		negative/negative	negative			28.8152	5.72147	23.0937
RebeccaRepeat	Br 2 LDA 9-29-09 Plate 1	G19	T04-104-006	Sarcoma	FGF2-Hs00960934_m1	1	WVUTB	56	T4, N0, M0	1	T4, N0, M0	0	F	Recurrent Cystosarcoma Phyllodes		1	N/A	N/A	Frozen					30.0416	10.2202	19.8214	19.9711
RebeccaRepeat	Br 2 LDA 9-29-09 Plate 1	G20	T04-104-006	Sarcoma	FGF2-Hs00960934_m1	2	WVUTB	56	T4, N0, M0	1	T4, N0, M0	0	F	Recurrent Cystosarcoma Phyllodes		1	N/A	N/A	Frozen					30.2395	10.2202	20.0192
RebeccaRepeat	Br 2 LDA 9-29-09 Plate 1	G21	T04-104-006	Sarcoma	FGF2-Hs00960934_m1	3	WVUTB	56	T4, N0, M0	1	T4, N0, M0	0	F	Recurrent Cystosarcoma Phyllodes		1	N/A	N/A	Frozen					30.293	10.2202	20.0728
Jill	10-09-08 Samples 50-53s40-44	H7	T0426310	DCIS	HMBS-Hs00609297_m1	1	WVUTB	63		0		0		DCIS		0	3	Poorly differentiated						29.3303	8.64477	20.6856	20.7606	18.8997	1.61591	1.12557	0.876487
Jill	10-09-08 Samples 50-53s40-44	H8	T0426310	DCIS	HMBS-Hs00609297_m1	2	WVUTB	63		0		0		DCIS		0	3	Poorly differentiated						29.4222	8.64477	20.7775
Jill	10-09-08 Samples 50-53s40-44	H9	T0426310	DCIS	HMBS-Hs00609297_m1	3	WVUTB	63		0		0		DCIS		0	3	Poorly differentiated						29.4636	8.64477	20.8188
Jill	10-07-08 Samples 26-29s-17-20	H7	T06449	DCIS	HMBS-Hs00609297_m1	1	WVUTB	56		0		0		DCIS		0	3	Poorly differentiated						26.6887	8.26771	18.421	18.0877
Jill	10-07-08 Samples 26-29s-17-20	H8	T06449	DCIS	HMBS-Hs00609297_m1	2	WVUTB	56		0		0		DCIS		0	3	Poorly differentiated						26.31	8.26771	18.0423
Jill	10-07-08 Samples 26-29s-17-20	H9	T06449	DCIS	HMBS-Hs00609297_m1	3	WVUTB	56		0		0		DCIS		0	3	Poorly differentiated						26.0675	8.26771	17.7998
2 RebeccaRepeat	Br 2 LDA 11-18-09 Plate 2	H11	T09-045-003	DCIS	HMBS-Hs00609297_m1	1	WVUTB	39	pTis, pN1mi, pMx	0	pTis, pN1mi, pMx	0	F	DCIS		0	1	Well-Differentiated	Frozen	negative / negative	not addressed			28.2978	10.5131	17.7848	17.8509
2 RebeccaRepeat	Br 2 LDA 11-18-09 Plate 2	H12	T09-045-003	DCIS	HMBS-Hs00609297_m1	2	WVUTB	39	pTis, pN1mi, pMx	0	pTis, pN1mi, pMx	0	F	DCIS		0	1	Well-Differentiated	Frozen	negative / negative	not addressed			28.3264	10.5131	17.8133
2 RebeccaRepeat	Br 2 LDA 11-18-09 Plate 2	H10	T09-045-003	DCIS	HMBS-Hs00609297_m1	3	WVUTB	39	pTis, pN1mi, pMx	0	pTis, pN1mi, pMx	0	F	DCIS		0	1	Well-Differentiated	Frozen	negative / negative	not addressed			28.4678	10.5131	17.9547
Jill	10-02-08 Samples 9-12	D7	1060163A9	Invasive Carcinoma	HMBS-Hs00609297_m1	1	CHTN	65	T2N0M0	2A	T2N0M0	0		invasive ductal carcinoma	8500/3: Infiltrating duct carcinoma, NOS	2	3	Poorly differentiated		negative/negative	intermediate: test to be repeated	Postmenopausal		25.9283	9.98487	15.9435	15.968	17.7411	3.05841	2.51288	0.015506
Jill	10-02-08 Samples 9-12	D8	1060163A9	Invasive Carcinoma	HMBS-Hs00609297_m1	2	CHTN	65	T2N0M0	2A	T2N0M0	0		invasive ductal carcinoma	8500/3: Infiltrating duct carcinoma, NOS	2	3	Poorly differentiated		negative/negative	intermediate: test to be repeated	Postmenopausal		25.6437	9.98487	15.6588
Jill	10-02-08 Samples 9-12	D9	1060163A9	Invasive Carcinoma	HMBS-Hs00609297_m1	3	CHTN	65	T2N0M0	2A	T2N0M0	0		invasive ductal carcinoma	8500/3: Infiltrating duct carcinoma, NOS	2	3	Poorly differentiated		negative/negative	intermediate: test to be repeated	Postmenopausal		26.2867	9.98487	16.3018
RebeccaRepeat	Br 2 LDA 9-29-09 Plate 1	D12	1060568A18	Invasive Carcinoma	HMBS-Hs00609297_m1	1	CHTN	50	T4, N1, M0	3B	T4, N1, M0	1	F	Invasive ductal carcinoma	8500/3: Infiltrating duct carcinoma, NOS	3	3	Poorly differentiated		positive/negative	negative			24.5077	10.3972	14.1105	14.4084
RebeccaRepeat	Br 2 LDA 9-29-09 Plate 1	D10	1060568A18	Invasive Carcinoma	HMBS-Hs00609297_m1	2	CHTN	50	T4, N1, M0	3B	T4, N1, M0	1	F	Invasive ductal carcinoma	8500/3: Infiltrating duct carcinoma, NOS	3	3	Poorly differentiated		positive/negative	negative			24.9027	10.3972	14.5055
RebeccaRepeat	Br 2 LDA 9-29-09 Plate 1	D11	1060568A18	Invasive Carcinoma	HMBS-Hs00609297_m1	3	CHTN	50	T4, N1, M0	3B	T4, N1, M0	1	F	Invasive ductal carcinoma	8500/3: Infiltrating duct carcinoma, NOS	3	3	Poorly differentiated		positive/negative	negative			25.0064	10.3972	14.6092
Jill	10-06-08 Samples 18-21s-09-12	D7	1060950A1	Invasive Carcinoma	HMBS-Hs00609297_m1	1	CHTN	63	T1cN0M0	1A	T1cN0M0	0		infiltrating ductal carcinoma, cribriform subtype	8500/3: Infiltrating duct carcinoma, NOS	1	1	Well-differentiated		positive/positive	negative			24.6674	6.92383	17.7435	17.7465
Jill	10-06-08 Samples 18-21s-09-12	D8	1060950A1	Invasive Carcinoma	HMBS-Hs00609297_m1	2	CHTN	63	T1cN0M0	1A	T1cN0M0	0		infiltrating ductal carcinoma, cribriform subtype	8500/3: Infiltrating duct carcinoma, NOS	1	1	Well-differentiated		positive/positive	negative			24.4734	6.92383	17.5495
Jill	10-06-08 Samples 18-21s-09-12	D9	1060950A1	Invasive Carcinoma	HMBS-Hs00609297_m1	3	CHTN	63	T1cN0M0	1A	T1cN0M0	0		infiltrating ductal carcinoma, cribriform subtype	8500/3: Infiltrating duct carcinoma, NOS	1	1	Well-differentiated		positive/positive	negative			24.8702	6.92383	17.9463
Jill	10-06-08 Samples 13-16-s-08-09	D7	1061053A1	Invasive Carcinoma	HMBS-Hs00609297_m1	1	CHTN	36	T3N1aM0	3A	T3N1aM0	1		infiltrating ductal carcinoma	8500/3: Infiltrating duct carcinoma, NOS	3	2	Moderately differentiated		positive/positive	(+1) probably negative	Premenopausal		23.9221	6.34086	17.5812	17.5939
Jill	10-06-08 Samples 13-16-s-08-09	D8	1061053A1	Invasive Carcinoma	HMBS-Hs00609297_m1	2	CHTN	36	T3N1aM0	3A	T3N1aM0	1		infiltrating ductal carcinoma	8500/3: Infiltrating duct carcinoma, NOS	3	2	Moderately differentiated		positive/positive	(+1) probably negative	Premenopausal		23.8916	6.34086	17.5508
Jill	10-06-08 Samples 13-16-s-08-09	D9	1061053A1	Invasive Carcinoma	HMBS-Hs00609297_m1	3	CHTN	36	T3N1aM0	3A	T3N1aM0	1		infiltrating ductal carcinoma	8500/3: Infiltrating duct carcinoma, NOS	3	2	Moderately differentiated		positive/positive	(+1) probably negative	Premenopausal		23.9906	6.34086	17.6497
RebeccaRepeat	Br 2 LDA 9-28-09 Plate 1	D12	1061562A15	Invasive Carcinoma	HMBS-Hs00609297_m1	1	CHTN	60	T2, N0, M0	2A	T2, N0, M0	0	F	Mucinous Adenocarcinoma	8480/3: Mucinous adenocarcinoma	2	1	Well-Differentiated	Frozen & Paraffin	positive/positive	negative			27.8319	9.96153	17.8704	17.9161
RebeccaRepeat	Br 2 LDA 9-28-09 Plate 1	D10	1061562A15	Invasive Carcinoma	HMBS-Hs00609297_m1	2	CHTN	60	T2, N0, M0	2A	T2, N0, M0	0	F	Mucinous Adenocarcinoma	8480/3: Mucinous adenocarcinoma	2	1	Well-Differentiated	Frozen & Paraffin	positive/positive	negative			27.8904	9.96153	17.9288
RebeccaRepeat	Br 2 LDA 9-28-09 Plate 1	D11	1061562A15	Invasive Carcinoma	HMBS-Hs00609297_m1	3	CHTN	60	T2, N0, M0	2A	T2, N0, M0	0	F	Mucinous Adenocarcinoma	8480/3: Mucinous adenocarcinoma	2	1	Well-Differentiated	Frozen & Paraffin	positive/positive	negative			27.9105	9.96153	17.9489
Jill	10-06-08 Samples 18-21s-09-12	P7	1061897A3	Invasive Carcinoma	HMBS-Hs00609297_m1	1	CHTN	85	T2N2aM0	3A	T2N2aM0	1		invasive lobular carcinoma	8524/3: Infiltrating lobular mixed with other types of ca.	3	1	Well-differentiated		positive/positive	negative	Postmenopausal		26.2712	7.70997	18.5612	18.7021
Jill	10-06-08 Samples 18-21s-09-12	P8	1061897A3	Invasive Carcinoma	HMBS-Hs00609297_m1	2	CHTN	85	T2N2aM0	3A	T2N2aM0	1		invasive lobular carcinoma	8524/3: Infiltrating lobular mixed with other types of ca.	3	1	Well-differentiated		positive/positive	negative	Postmenopausal		26.663	7.70997	18.953
Jill	10-06-08 Samples 18-21s-09-12	P9	1061897A3	Invasive Carcinoma	HMBS-Hs00609297_m1	3	CHTN	85	T2N2aM0	3A	T2N2aM0	1		invasive lobular carcinoma	8524/3: Infiltrating lobular mixed with other types of ca.	3	1	Well-differentiated		positive/positive	negative	Postmenopausal		26.3019	7.70997	18.592
RebeccaRepeat	Br 2 LDA 9-28-09 Plate 2	D10	1062323A6	Invasive Carcinoma	HMBS-Hs00609297_m1	1	CHTN	62	T2N0M0	2A	T2N0M0	0	F	Infiltrating Ductal Carcinoma	8500/3: Infiltrating duct carcinoma, NOS	2	3	Poorly Differentiated	Frozen & Paraffin	negative/negative	negative			28.6543	8.83488	19.8194	19.9914
RebeccaRepeat	Br 2 LDA 9-28-09 Plate 2	D11	1062323A6	Invasive Carcinoma	HMBS-Hs00609297_m1	2	CHTN	62	T2N0M0	2A	T2N0M0	0	F	Infiltrating Ductal Carcinoma	8500/3: Infiltrating duct carcinoma, NOS	2	3	Poorly Differentiated	Frozen & Paraffin	negative/negative	negative			28.9016	8.83488	20.0667
RebeccaRepeat	Br 2 LDA 9-28-09 Plate 2	D12	1062323A6	Invasive Carcinoma	HMBS-Hs00609297_m1	3	CHTN	62	T2N0M0	2A	T2N0M0	0	F	Infiltrating Ductal Carcinoma	8500/3: Infiltrating duct carcinoma, NOS	2	3	Poorly Differentiated	Frozen & Paraffin	negative/negative	negative			28.923	8.83488	20.0881
RebeccaRepeat	Br 2 LDA 9-28-09 Plate 1	H12	1070062A1	Invasive Carcinoma	HMBS-Hs00609297_m1	1	CHTN	49	T2N0M0	2A	T2N0M0	0	F	Ductal Adenocarcinoma	8500/3: Infiltrating duct carcinoma, NOS	2	3	Poorly differentiated		positive/positive	negative			27.4494	9.88308	17.5663	17.5884
RebeccaRepeat	Br 2 LDA 9-28-09 Plate 1	H10	1070062A1	Invasive Carcinoma	HMBS-Hs00609297_m1	2	CHTN	49	T2N0M0	2A	T2N0M0	0	F	Ductal Adenocarcinoma	8500/3: Infiltrating duct carcinoma, NOS	2	3	Poorly differentiated		positive/positive	negative			27.4668	9.88308	17.5837
RebeccaRepeat	Br 2 LDA 9-28-09 Plate 1	H11	1070062A1	Invasive Carcinoma	HMBS-Hs00609297_m1	3	CHTN	49	T2N0M0	2A	T2N0M0	0	F	Ductal Adenocarcinoma	8500/3: Infiltrating duct carcinoma, NOS	2	3	Poorly differentiated		positive/positive	negative			27.4983	9.88308	17.6152
Jill	10-06-08 Samples 22-25Maricicass12-16	P7	1070512A1	Invasive Carcinoma	HMBS-Hs00609297_m1	1	CHTN	80	T1cN0M0	1A	T1cN0M0	0		invasive ductal carcinoma	8500/3: Infiltrating duct carcinoma, NOS	1	2	Moderately differentiated		positive/positive	negative			26.3296	6.83775	19.4919	19.5662
Jill	10-06-08 Samples 22-25Maricicass12-16	P8	1070512A1	Invasive Carcinoma	HMBS-Hs00609297_m1	2	CHTN	80	T1cN0M0	1A	T1cN0M0	0		invasive ductal carcinoma	8500/3: Infiltrating duct carcinoma, NOS	1	2	Moderately differentiated		positive/positive	negative			26.4706	6.83775	19.6328
Jill	10-06-08 Samples 22-25Maricicass12-16	P9	1070512A1	Invasive Carcinoma	HMBS-Hs00609297_m1	3	CHTN	80	T1cN0M0	1A	T1cN0M0	0		invasive ductal carcinoma	8500/3: Infiltrating duct carcinoma, NOS	1	2	Moderately differentiated		positive/positive	negative			26.4115	6.83775	19.5738
2 RebeccaRepeat	Br 2 LDA 11-18-09 Plate 1	P11	1072014A5	Invasive Carcinoma	HMBS-Hs00609297_m1	1	CHTN	49	T3N0M0	2B	T3N0M0	0	F	Invasive ductal carcinoma	8500/3: Infiltrating duct carcinoma, NOS	2	3	Poorly differentiated		positive/positive	positive			28.5335	5.80943	22.7241	22.7453
2 RebeccaRepeat	Br 2 LDA 11-18-09 Plate 1	P12	1072014A5	Invasive Carcinoma	HMBS-Hs00609297_m1	2	CHTN	49	T3N0M0	2B	T3N0M0	0	F	Invasive ductal carcinoma	8500/3: Infiltrating duct carcinoma, NOS	2	3	Poorly differentiated		positive/positive	positive			28.5545	5.80943	22.7451
2 RebeccaRepeat	Br 2 LDA 11-18-09 Plate 1	P10	1072014A5	Invasive Carcinoma	HMBS-Hs00609297_m1	3	CHTN	49	T3N0M0	2B	T3N0M0	0	F	Invasive ductal carcinoma	8500/3: Infiltrating duct carcinoma, NOS	2	3	Poorly differentiated		positive/positive	positive			28.5762	5.80943	22.7668
RebeccaRepeat	Br 2 LDA 9-25-09 Plate 1	D12	1080312A4	Invasive Carcinoma	HMBS-Hs00609297_m1	1	CHTN	71	T2N1M0	2B	T2N1M0	1	F	Invasive Ductal Carcinoma	8500/3: Infiltrating duct carcinoma, NOS	2	2	Moderately differentiated	Frozen& Paraffin	positive/positive	negative			28.7894	10.076	18.7134	18.7442
RebeccaRepeat	Br 2 LDA 9-25-09 Plate 1	D11	1080312A4	Invasive Carcinoma	HMBS-Hs00609297_m1	2	CHTN	71	T2N1M0	2B	T2N1M0	1	F	Invasive Ductal Carcinoma	8500/3: Infiltrating duct carcinoma, NOS	2	2	Moderately differentiated	Frozen& Paraffin	positive/positive	negative			28.808	10.076	18.732
RebeccaRepeat	Br 2 LDA 9-25-09 Plate 1	D10	1080312A4	Invasive Carcinoma	HMBS-Hs00609297_m1	3	CHTN	71	T2N1M0	2B	T2N1M0	1	F	Invasive Ductal Carcinoma	8500/3: Infiltrating duct carcinoma, NOS	2	2	Moderately differentiated	Frozen& Paraffin	positive/positive	negative			28.8633	10.076	18.7873
2 RebeccaRepeat	Br 2 LDA 10-26-09 Plate 2 mirVana	H11	1080502A1	Invasive Carcinoma	HMBS-Hs00609297_m1	1	CHTN	42	T2N0M0	2A	T2N0M0	0	F	Invasive Ductal Carcinoma	8500/3: Infiltrating duct carcinoma, NOS	2	3	Poorly differentiated	Frozen& Paraffin	pending	pending			30.365	14.3589	16.0061	16.3209
2 RebeccaRepeat	Br 2 LDA 10-26-09 Plate 2 mirVana	H10	1080502A1	Invasive Carcinoma	HMBS-Hs00609297_m1	2	CHTN	42	T2N0M0	2A	T2N0M0	0	F	Invasive Ductal Carcinoma	8500/3: Infiltrating duct carcinoma, NOS	2	3	Poorly differentiated	Frozen& Paraffin	pending	pending			30.768	14.3589	16.4091
2 RebeccaRepeat	Br 2 LDA 10-26-09 Plate 2 mirVana	H12	1080502A1	Invasive Carcinoma	HMBS-Hs00609297_m1	3	CHTN	42	T2N0M0	2A	T2N0M0	0	F	Invasive Ductal Carcinoma	8500/3: Infiltrating duct carcinoma, NOS	2	3	Poorly differentiated	Frozen& Paraffin	pending	pending			30.9064	14.3589	16.5475
2 RebeccaRepeat	Br 2 LDA 10-26-09 Plate 2 mirVana	D11	1080719B5	Invasive Carcinoma	HMBS-Hs00609297_m1	1	CHTN	64	T3N0M0	2B	T3N0M0	0	F	Invasive Ductal Carcinoma	8500/3: Infiltrating duct carcinoma, NOS	2	3	Poorly Differentiated	Frozen & Paraffin	ordered	ordered			30.3267	16.0027	14.324	14.5761
2 RebeccaRepeat	Br 2 LDA 10-26-09 Plate 2 mirVana	D10	1080719B5	Invasive Carcinoma	HMBS-Hs00609297_m1	2	CHTN	64	T3N0M0	2B	T3N0M0	0	F	Invasive Ductal Carcinoma	8500/3: Infiltrating duct carcinoma, NOS	2	3	Poorly Differentiated	Frozen & Paraffin	ordered	ordered			30.572	16.0027	14.5693
2 RebeccaRepeat	Br 2 LDA 10-26-09 Plate 2 mirVana	D12	1080719B5	Invasive Carcinoma	HMBS-Hs00609297_m1	3	CHTN	64	T3N0M0	2B	T3N0M0	0	F	Invasive Ductal Carcinoma	8500/3: Infiltrating duct carcinoma, NOS	2	3	Poorly Differentiated	Frozen & Paraffin	ordered	ordered			30.8377	16.0027	14.835
2 RebeccaRepeat	Br 2 LDA 10-26-09 Plate 2 mirVana	L11	1081454A6	Invasive Carcinoma	HMBS-Hs00609297_m1	1	CHTN	51	T2N0M0	2A	T2N0M0	0	M	Invasive Ductal Carcinoma	8500/3: Infiltrating duct carcinoma, NOS	2	3	Poorly Differentiated	Frozen & Paraffin	positive / negative	negative			30.4186	13.9592	16.4593	16.659
2 RebeccaRepeat	Br 2 LDA 10-26-09 Plate 2 mirVana	L10	1081454A6	Invasive Carcinoma	HMBS-Hs00609297_m1	2	CHTN	51	T2N0M0	2A	T2N0M0	0	M	Invasive Ductal Carcinoma	8500/3: Infiltrating duct carcinoma, NOS	2	3	Poorly Differentiated	Frozen & Paraffin	positive / negative	negative			30.6662	13.9592	16.7069
2 RebeccaRepeat	Br 2 LDA 10-26-09 Plate 2 mirVana	L12	1081454A6	Invasive Carcinoma	HMBS-Hs00609297_m1	3	CHTN	51	T2N0M0	2A	T2N0M0	0	M	Invasive Ductal Carcinoma	8500/3: Infiltrating duct carcinoma, NOS	2	3	Poorly Differentiated	Frozen & Paraffin	positive / negative	negative			30.7699	13.9592	16.8106
Jill	10-06-08 Samples 18-21s-09-12	H7	3061119A4	Invasive Carcinoma	HMBS-Hs00609297_m1	1	CHTN	74	T2N0M0	2A	T2N0M0	0		infiltrating ductal carcinoma with mucinous differentiation	8523/3: Infiltrating duct mixed with other types of ca.	2	1	Well-differentiated						24.8929	8.0076	16.8853	16.9892
Jill	10-06-08 Samples 18-21s-09-12	H8	3061119A4	Invasive Carcinoma	HMBS-Hs00609297_m1	2	CHTN	74	T2N0M0	2A	T2N0M0	0		infiltrating ductal carcinoma with mucinous differentiation	8523/3: Infiltrating duct mixed with other types of ca.	2	1	Well-differentiated						24.9471	8.0076	16.9395
Jill	10-06-08 Samples 18-21s-09-12	H9	3061119A4	Invasive Carcinoma	HMBS-Hs00609297_m1	3	CHTN	74	T2N0M0	2A	T2N0M0	0		infiltrating ductal carcinoma with mucinous differentiation	8523/3: Infiltrating duct mixed with other types of ca.	2	1	Well-differentiated						25.1504	8.0076	17.1428
2 RebeccaRepeat	Br 2 LDA 11-18-09 Plate 1	L10	3062104A7	Invasive Carcinoma	HMBS-Hs00609297_m1	1	CHTN	52	T2, N0, M0	2A	T2, N0, M0	0	F	Invasive ductal carcinoma	8500/3: Infiltrating duct carcinoma, NOS	2	3	Poorly Differentiated						28.1044	5.27169	22.8327	22.8469
2 RebeccaRepeat	Br 2 LDA 11-18-09 Plate 1	L11	3062104A7	Invasive Carcinoma	HMBS-Hs00609297_m1	2	CHTN	52	T2, N0, M0	2A	T2, N0, M0	0	F	Invasive ductal carcinoma	8500/3: Infiltrating duct carcinoma, NOS	2	3	Poorly Differentiated						28.0357	5.27169	22.764
2 RebeccaRepeat	Br 2 LDA 11-18-09 Plate 1	L12	3062104A7	Invasive Carcinoma	HMBS-Hs00609297_m1	3	CHTN	52	T2, N0, M0	2A	T2, N0, M0	0	F	Invasive ductal carcinoma	8500/3: Infiltrating duct carcinoma, NOS	2	3	Poorly Differentiated						28.2158	5.27169	22.9441
Jill	10-06-08 Samples 13-16-s-08-09	L7	3070617A7	Invasive Carcinoma	HMBS-Hs00609297_m1	1	CHTN	83	T3N0M0	2B	T3N0M0	0		infiltrating ductal carcinoma	8500/3: Infiltrating duct carcinoma, NOS	2	2	Moderately differentiated		positive/positive				25.8425	10.0795	15.763	15.9394
Jill	10-06-08 Samples 13-16-s-08-09	L8	3070617A7	Invasive Carcinoma	HMBS-Hs00609297_m1	2	CHTN	83	T3N0M0	2B	T3N0M0	0		infiltrating ductal carcinoma	8500/3: Infiltrating duct carcinoma, NOS	2	2	Moderately differentiated		positive/positive				26.0152	10.0795	15.9356
Jill	10-06-08 Samples 13-16-s-08-09	L9	3070617A7	Invasive Carcinoma	HMBS-Hs00609297_m1	3	CHTN	83	T3N0M0	2B	T3N0M0	0		infiltrating ductal carcinoma	8500/3: Infiltrating duct carcinoma, NOS	2	2	Moderately differentiated		positive/positive				26.1991	10.0795	16.1195
Jill	10-06-08 Samples 22-25Maricicass12-16	H7	4060634A10	Invasive Carcinoma	HMBS-Hs00609297_m1	1	CHTN	79	T2N0M0	2A	T2N0M0	0		infiltrating ductal carcinoma with foci of cartilagginous metaplasia (metaplastic carcinoma)	8523/3: Infiltrating duct mixed with other types of ca.	2	3	Poorly differentiated						28.1545	8.78822	19.3663	19.1734
Jill	10-06-08 Samples 22-25Maricicass12-16	H8	4060634A10	Invasive Carcinoma	HMBS-Hs00609297_m1	2	CHTN	79	T2N0M0	2A	T2N0M0	0		infiltrating ductal carcinoma with foci of cartilagginous metaplasia (metaplastic carcinoma)	8523/3: Infiltrating duct mixed with other types of ca.	2	3	Poorly differentiated						27.949	8.78822	19.1608
Jill	10-06-08 Samples 22-25Maricicass12-16	H9	4060634A10	Invasive Carcinoma	HMBS-Hs00609297_m1	3	CHTN	79	T2N0M0	2A	T2N0M0	0		infiltrating ductal carcinoma with foci of cartilagginous metaplasia (metaplastic carcinoma)	8523/3: Infiltrating duct mixed with other types of ca.	2	3	Poorly differentiated						27.7813	8.78822	18.993
Jill	10-02-08 Samples 9-12	L7	4061094B24	Invasive Carcinoma	HMBS-Hs00609297_m1	1	CHTN	84	T3N1M0	3C	T3N1M0	1		infiltrating ductal carcinoma	8500/3: Infiltrating duct carcinoma, NOS	3	3	Poorly differentiated						23.8306	11.0615	12.7691	13.0263
Jill	10-02-08 Samples 9-12	L8	4061094B24	Invasive Carcinoma	HMBS-Hs00609297_m1	2	CHTN	84	T3N1M0	3C	T3N1M0	1		infiltrating ductal carcinoma	8500/3: Infiltrating duct carcinoma, NOS	3	3	Poorly differentiated						24.3942	11.0615	13.3328
Jill	10-02-08 Samples 9-12	L9	4061094B24	Invasive Carcinoma	HMBS-Hs00609297_m1	3	CHTN	84	T3N1M0	3C	T3N1M0	1		infiltrating ductal carcinoma	8500/3: Infiltrating duct carcinoma, NOS	3	3	Poorly differentiated						24.0384	11.0615	12.9769
Jill	10-02-08 Samples 9-12	P7	4061196A1	Invasive Carcinoma	HMBS-Hs00609297_m1	1	CHTN	75	T2N0M0	2A	T2N0M0	0		infiltrating lobular carcinoma with pleomorphic features and infiltrating ductal carcinoma (small component)	8524/3: Infiltrating lobular mixed with other types of ca.	2	2	Moderately differentiated						27.11	7.20059	19.9094	19.9452
Jill	10-02-08 Samples 9-12	P8	4061196A1	Invasive Carcinoma	HMBS-Hs00609297_m1	2	CHTN	75	T2N0M0	2A	T2N0M0	0		infiltrating lobular carcinoma with pleomorphic features and infiltrating ductal carcinoma (small component)	8524/3: Infiltrating lobular mixed with other types of ca.	2	2	Moderately differentiated						27.2498	7.20059	20.0492
Jill	10-02-08 Samples 9-12	P9	4061196A1	Invasive Carcinoma	HMBS-Hs00609297_m1	3	CHTN	75	T2N0M0	2A	T2N0M0	0		infiltrating lobular carcinoma with pleomorphic features and infiltrating ductal carcinoma (small component)	8524/3: Infiltrating lobular mixed with other types of ca.	2	2	Moderately differentiated						27.0776	7.20059	19.877
Jill	10-06-08 Samples 13-16-s-08-09	P7	4070249A3	Invasive Carcinoma	HMBS-Hs00609297_m1	1	CHTN	61	T2N0M0	2A	T2N0M0	0		invasive lobular carcinoma, pleomorphic type with signet-ring cell features	8524/3: Infiltrating lobular mixed with other types of ca.	2	1	Well-differentiated						27.3665	11.885	15.4815	15.6492
Jill	10-06-08 Samples 13-16-s-08-09	P8	4070249A3	Invasive Carcinoma	HMBS-Hs00609297_m1	2	CHTN	61	T2N0M0	2A	T2N0M0	0		invasive lobular carcinoma, pleomorphic type with signet-ring cell features	8524/3: Infiltrating lobular mixed with other types of ca.	2	1	Well-differentiated						27.7044	11.885	15.8194
Jill	10-06-08 Samples 13-16-s-08-09	P9	4070249A3	Invasive Carcinoma	HMBS-Hs00609297_m1	3	CHTN	61	T2N0M0	2A	T2N0M0	0		invasive lobular carcinoma, pleomorphic type with signet-ring cell features	8524/3: Infiltrating lobular mixed with other types of ca.	2	1	Well-differentiated						27.5318	11.885	15.6468
RebeccaRepeat	Br 2 LDA 9-28-09 Plate 1	L10	4080633A6	Invasive Carcinoma	HMBS-Hs00609297_m1	1	CHTN	65	T3, N1, M0	3A	T3, N1, M0	1	F	Invasive Ductal Carcinoma	8500/3: Infiltrating duct carcinoma, NOS	3	3	Poorly Differentiated	Frozen& Paraffin					28.445	10.7268	17.7182	17.8019
RebeccaRepeat	Br 2 LDA 9-28-09 Plate 1	L12	4080633A6	Invasive Carcinoma	HMBS-Hs00609297_m1	2	CHTN	65	T3, N1, M0	3A	T3, N1, M0	1	F	Invasive Ductal Carcinoma	8500/3: Infiltrating duct carcinoma, NOS	3	3	Poorly Differentiated	Frozen& Paraffin					28.5228	10.7268	17.796
RebeccaRepeat	Br 2 LDA 9-28-09 Plate 1	L11	4080633A6	Invasive Carcinoma	HMBS-Hs00609297_m1	3	CHTN	65	T3, N1, M0	3A	T3, N1, M0	1	F	Invasive Ductal Carcinoma	8500/3: Infiltrating duct carcinoma, NOS	3	3	Poorly Differentiated	Frozen& Paraffin					28.6182	10.7268	17.8914
RebeccaLast	Br 2 LDA 1-7-10 Plate 1	L10	T03-104	Invasive Carcinoma	HMBS-Hs00609297_m1	1	WVUTB	Missing	T3N1M0	3A	T3N1M0	1	F	Infiltrating Ductal Carcinoma	8500/3: Infiltrating duct carcinoma, NOS	3	3	Poorly differentiated	Frozen	negative/negative	negative			28.659	14.5378	14.1213	14.2846
RebeccaLast	Br 2 LDA 1-7-10 Plate 1	L11	T03-104	Invasive Carcinoma	HMBS-Hs00609297_m1	2	WVUTB	Missing	T3N1M0	3A	T3N1M0	1	F	Infiltrating Ductal Carcinoma	8500/3: Infiltrating duct carcinoma, NOS	3	3	Poorly differentiated	Frozen	negative/negative	negative			28.9207	14.5378	14.3829
RebeccaLast	Br 2 LDA 1-7-10 Plate 1	L12	T03-104	Invasive Carcinoma	HMBS-Hs00609297_m1	3	WVUTB	Missing	T3N1M0	3A	T3N1M0	1	F	Infiltrating Ductal Carcinoma	8500/3: Infiltrating duct carcinoma, NOS	3	3	Poorly differentiated	Frozen	negative/negative	negative			28.8872	14.5378	14.3495
Jill	10-09-08 Samples 50-53s40-44	D7	T033474	Invasive Carcinoma	HMBS-Hs00609297_m1	1	WVUTB	50	I;T1,NO,MO		T1,NO,MO	0		infiltrating ductal carcinoma	8500/3: Infiltrating duct carcinoma, NOS	1	2	Moderately Differentiated						29.4092	8.56206	20.8472	20.8019
Jill	10-09-08 Samples 50-53s40-44	D8	T033474	Invasive Carcinoma	HMBS-Hs00609297_m1	2	WVUTB	50	I;T1,NO,MO		T1,NO,MO	0		infiltrating ductal carcinoma	8500/3: Infiltrating duct carcinoma, NOS	1	2	Moderately Differentiated						29.2982	8.56206	20.7361
Jill	10-09-08 Samples 50-53s40-44	D9	T033474	Invasive Carcinoma	HMBS-Hs00609297_m1	3	WVUTB	50	I;T1,NO,MO		T1,NO,MO	0		infiltrating ductal carcinoma	8500/3: Infiltrating duct carcinoma, NOS	1	2	Moderately Differentiated						29.3846	8.56206	20.8225
Jill	10-09-08 Samples 50-53s40-44	L7	T041014	Invasive Carcinoma	HMBS-Hs00609297_m1	1	WVUTB	66	IIA,T2, N0, M0		T2, N0, M0	0		invasive ductal carcinoma	8500/3: Infiltrating duct carcinoma, NOS	2	3	Poorly differentiated						26.8148	5.78564	21.0292	20.9401
Jill	10-09-08 Samples 50-53s40-44	L8	T041014	Invasive Carcinoma	HMBS-Hs00609297_m1	2	WVUTB	66	IIA,T2, N0, M0		T2, N0, M0	0		invasive ductal carcinoma	8500/3: Infiltrating duct carcinoma, NOS	2	3	Poorly differentiated						26.6246	5.78564	20.839
Jill	10-09-08 Samples 50-53s40-44	L9	T041014	Invasive Carcinoma	HMBS-Hs00609297_m1	3	WVUTB	66	IIA,T2, N0, M0		T2, N0, M0	0		invasive ductal carcinoma	8500/3: Infiltrating duct carcinoma, NOS	2	3	Poorly differentiated						26.7376	5.78564	20.952
2 RebeccaRepeat	Br 2 LDA 11-16-09 Plate 1	P10	T04-167-005	Invasive Carcinoma	HMBS-Hs00609297_m1	1	WVUTB	43	T2, N0, M0	2A	T2, N0, M0	0	F	Infiltrating metastatic ductal carcinoma	8500/3: Infiltrating duct carcinoma, NOS	2	3	Poorly differentiated	Frozen	positive/positive	intermediate	Pre menopausal		28.8264	10.7992	18.0271	18.0394
2 RebeccaRepeat	Br 2 LDA 11-16-09 Plate 1	P12	T04-167-005	Invasive Carcinoma	HMBS-Hs00609297_m1	2	WVUTB	43	T2, N0, M0	2A	T2, N0, M0	0	F	Infiltrating metastatic ductal carcinoma	8500/3: Infiltrating duct carcinoma, NOS	2	3	Poorly differentiated	Frozen	positive/positive	intermediate	Pre menopausal		28.838	10.7992	18.0388
2 RebeccaRepeat	Br 2 LDA 11-16-09 Plate 1	P11	T04-167-005	Invasive Carcinoma	HMBS-Hs00609297_m1	3	WVUTB	43	T2, N0, M0	2A	T2, N0, M0	0	F	Infiltrating metastatic ductal carcinoma	8500/3: Infiltrating duct carcinoma, NOS	2	3	Poorly differentiated	Frozen	positive/positive	intermediate	Pre menopausal		28.8516	10.7992	18.0523
Jill	10-09-08 Samples 46-49s37-40	L7	T053774	Invasive Carcinoma	HMBS-Hs00609297_m1	1	WVUTB	59	IIA;T2,N0,M0		T2,N0,M0	0		infiltrating ductal carcinoma	8500/3: Infiltrating duct carcinoma, NOS	2	3	Poorly differentiated						23.8479	5.64001	18.2079	18.2821
Jill	10-09-08 Samples 46-49s37-40	L8	T053774	Invasive Carcinoma	HMBS-Hs00609297_m1	2	WVUTB	59	IIA;T2,N0,M0		T2,N0,M0	0		infiltrating ductal carcinoma	8500/3: Infiltrating duct carcinoma, NOS	2	3	Poorly differentiated						23.9029	5.64001	18.2629
Jill	10-09-08 Samples 46-49s37-40	L9	T053774	Invasive Carcinoma	HMBS-Hs00609297_m1	3	WVUTB	59	IIA;T2,N0,M0		T2,N0,M0	0		infiltrating ductal carcinoma	8500/3: Infiltrating duct carcinoma, NOS	2	3	Poorly differentiated						24.0154	5.64001	18.3754
Jill	10-07-08 Samples 34-37-Maricicas-27-28	D7	T053889	Invasive Carcinoma	HMBS-Hs00609297_m1	1	WVUTB	80	IIA, pT2, pN0, pM0		pT2, pN0, pM0	0		infiltrating ductal adenocarcinoma	8500/3: Infiltrating duct carcinoma, NOS	2	3	Poorly differentiated						26.1071	7.30877	18.7983	18.8447
Jill	10-07-08 Samples 34-37-Maricicas-27-28	D8	T053889	Invasive Carcinoma	HMBS-Hs00609297_m1	2	WVUTB	80	IIA, pT2, pN0, pM0		pT2, pN0, pM0	0		infiltrating ductal adenocarcinoma	8500/3: Infiltrating duct carcinoma, NOS	2	3	Poorly differentiated						26.1066	7.30877	18.7978
Jill	10-07-08 Samples 34-37-Maricicas-27-28	D9	T053889	Invasive Carcinoma	HMBS-Hs00609297_m1	3	WVUTB	80	IIA, pT2, pN0, pM0		pT2, pN0, pM0	0		infiltrating ductal adenocarcinoma	8500/3: Infiltrating duct carcinoma, NOS	2	3	Poorly differentiated						26.2468	7.30877	18.9381
Jill	10-08-08 Samples 38-41s31-32	P7	T0607908	Invasive Carcinoma	HMBS-Hs00609297_m1	1	WVUTB	46	IIA, pT2N0M0		pT2N0M0	0		papillary carcinoma	8050/3: Papillary carcinoma, NOS	2	2	Moderately differentiated						25.3115	6.56973	18.7418	18.9176
Jill	10-08-08 Samples 38-41s31-32	P8	T0607908	Invasive Carcinoma	HMBS-Hs00609297_m1	2	WVUTB	46	IIA, pT2N0M0		pT2N0M0	0		papillary carcinoma	8050/3: Papillary carcinoma, NOS	2	2	Moderately differentiated						25.5193	6.56973	18.9496
Jill	10-08-08 Samples 38-41s31-32	P9	T0607908	Invasive Carcinoma	HMBS-Hs00609297_m1	3	WVUTB	46	IIA, pT2N0M0		pT2N0M0	0		papillary carcinoma	8050/3: Papillary carcinoma, NOS	2	2	Moderately differentiated						25.6312	6.56973	19.0615
Jill	10-08-08 Samples 42-45s32-36	L7	T061324	Invasive Carcinoma	HMBS-Hs00609297_m1	1	WVUTB	55	II, pT2, pN0, pM0		pT2, pN0, pM0	0		invasive ductal adenocarcinoma, mucinous	8500/3: Infiltrating duct carcinoma, NOS	2	3	Poorly Differentiated						25.0216	6.26543	18.7562	18.8194
Jill	10-08-08 Samples 42-45s32-36	L8	T061324	Invasive Carcinoma	HMBS-Hs00609297_m1	2	WVUTB	55	II, pT2, pN0, pM0		pT2, pN0, pM0	0		invasive ductal adenocarcinoma, mucinous	8500/3: Infiltrating duct carcinoma, NOS	2	3	Poorly Differentiated						24.9832	6.26543	18.7178
Jill	10-08-08 Samples 42-45s32-36	L9	T061324	Invasive Carcinoma	HMBS-Hs00609297_m1	3	WVUTB	55	II, pT2, pN0, pM0		pT2, pN0, pM0	0		invasive ductal adenocarcinoma, mucinous	8500/3: Infiltrating duct carcinoma, NOS	2	3	Poorly Differentiated						25.2496	6.26543	18.9842
Jill	10-07-08 Samples 34-37-Maricicas-27-28	L7	T0621513	Invasive Carcinoma	HMBS-Hs00609297_m1	1	WVUTB	86	IIIB, T4, N1, M0		T4, N1, M0	1		mammary carcinoma, predominately mucinous adenocarcinoma with areas of infiltrating ductal carcinoma	8480/3: Mucinous adenocarcinoma	3	3	Poorly differentiated						25.871	7.7534	18.1176	18.1785
Jill	10-07-08 Samples 34-37-Maricicas-27-28	L8	T0621513	Invasive Carcinoma	HMBS-Hs00609297_m1	2	WVUTB	86	IIIB, T4, N1, M0		T4, N1, M0	1		mammary carcinoma, predominately mucinous adenocarcinoma with areas of infiltrating ductal carcinoma	8480/3: Mucinous adenocarcinoma	3	3	Poorly differentiated						25.9307	7.7534	18.1773
Jill	10-07-08 Samples 34-37-Maricicas-27-28	L9	T0621513	Invasive Carcinoma	HMBS-Hs00609297_m1	3	WVUTB	86	IIIB, T4, N1, M0		T4, N1, M0	1		mammary carcinoma, predominately mucinous adenocarcinoma with areas of infiltrating ductal carcinoma	8480/3: Mucinous adenocarcinoma	3	3	Poorly differentiated						25.9941	7.7534	18.2407
Jill	10-07-08 Samples 34-37-Maricicas-27-28	P7	T0630919	Invasive Carcinoma	HMBS-Hs00609297_m1	1	WVUTB	58	I, pT1,pN0, pM0		pT1,pN0, pM0	0		invasive ductal carcinoma, mucinous carcinoma	8500/3: Infiltrating duct carcinoma, NOS	1	1	Well-differentiated						26.4284	8.44754	17.9809	18.1465
Jill	10-07-08 Samples 34-37-Maricicas-27-28	P8	T0630919	Invasive Carcinoma	HMBS-Hs00609297_m1	2	WVUTB	58	I, pT1,pN0, pM0		pT1,pN0, pM0	0		invasive ductal carcinoma, mucinous carcinoma	8500/3: Infiltrating duct carcinoma, NOS	1	1	Well-differentiated						26.607	8.44754	18.1595
Jill	10-07-08 Samples 34-37-Maricicas-27-28	P9	T0630919	Invasive Carcinoma	HMBS-Hs00609297_m1	3	WVUTB	58	I, pT1,pN0, pM0		pT1,pN0, pM0	0		invasive ductal carcinoma, mucinous carcinoma	8500/3: Infiltrating duct carcinoma, NOS	1	1	Well-differentiated						26.7466	8.44754	18.299
RebeccaRepeat	Br 2 LDA 9-28-09 Plate 2	L10	T06-326-013	Invasive Carcinoma	HMBS-Hs00609297_m1	1	WVUTB	44	pT2, pN2a, pMx	3A	pT2, pN2a, pMx	1	F	Invasive ductal carcinoma	8500/3: Infiltrating duct carcinoma, NOS	3	3	Poorly differentiated	Frozen	Positive / Positive	negative			27.7693	9.01661	18.7527	18.8456
RebeccaRepeat	Br 2 LDA 9-28-09 Plate 2	L12	T06-326-013	Invasive Carcinoma	HMBS-Hs00609297_m1	2	WVUTB	44	pT2, pN2a, pMx	3A	pT2, pN2a, pMx	1	F	Invasive ductal carcinoma	8500/3: Infiltrating duct carcinoma, NOS	3	3	Poorly differentiated	Frozen	Positive / Positive	negative			27.8822	9.01661	18.8656
RebeccaRepeat	Br 2 LDA 9-28-09 Plate 2	L11	T06-326-013	Invasive Carcinoma	HMBS-Hs00609297_m1	3	WVUTB	44	pT2, pN2a, pMx	3A	pT2, pN2a, pMx	1	F	Invasive ductal carcinoma	8500/3: Infiltrating duct carcinoma, NOS	3	3	Poorly differentiated	Frozen	Positive / Positive	negative			27.9351	9.01661	18.9185
Jill	10-08-08 Samples 38-41s31-32	D7	T0633206	Invasive Carcinoma	HMBS-Hs00609297_m1	1	WVUTB	50	IIA, pT2, pN0, pM0		pT2, pN0, pM0	0		invasive ductal carcinoma	8500/3: Infiltrating duct carcinoma, NOS	2	1	Well-differentiated						27.2688	8.27849	18.9903	19.0252
Jill	10-08-08 Samples 38-41s31-32	D8	T0633206	Invasive Carcinoma	HMBS-Hs00609297_m1	2	WVUTB	50	IIA, pT2, pN0, pM0		pT2, pN0, pM0	0		invasive ductal carcinoma	8500/3: Infiltrating duct carcinoma, NOS	2	1	Well-differentiated						27.6056	8.27849	19.3271
Jill	10-08-08 Samples 38-41s31-32	D9	T0633206	Invasive Carcinoma	HMBS-Hs00609297_m1	3	WVUTB	50	IIA, pT2, pN0, pM0		pT2, pN0, pM0	0		invasive ductal carcinoma	8500/3: Infiltrating duct carcinoma, NOS	2	1	Well-differentiated						27.0366	8.27849	18.7581
Jill	10-08-08 Samples 42-45s32-36	D7	T0633418	Invasive Carcinoma	HMBS-Hs00609297_m1	1	WVUTB	50	IIIC, pT1, pN3a, pM0		pT1, pN3a, pM0	1		infiltrating ductal adenocarcinoma	8500/3: Infiltrating duct carcinoma, NOS	3	3	Poorly Differentiated						23.8507	4.40614	19.4446	19.3825
Jill	10-08-08 Samples 42-45s32-36	D8	T0633418	Invasive Carcinoma	HMBS-Hs00609297_m1	2	WVUTB	50	IIIC, pT1, pN3a, pM0		pT1, pN3a, pM0	1		infiltrating ductal adenocarcinoma	8500/3: Infiltrating duct carcinoma, NOS	3	3	Poorly Differentiated						23.8044	4.40614	19.3983
Jill	10-08-08 Samples 42-45s32-36	D9	T0633418	Invasive Carcinoma	HMBS-Hs00609297_m1	3	WVUTB	50	IIIC, pT1, pN3a, pM0		pT1, pN3a, pM0	1		infiltrating ductal adenocarcinoma	8500/3: Infiltrating duct carcinoma, NOS	3	3	Poorly Differentiated						23.7108	4.40614	19.3047
Jill	10-07-08 Samples 26-29s-17-20	D7	T066004	Invasive Carcinoma	HMBS-Hs00609297_m1	1	WVUTB	46	IIA, T2, N1, M0		T2, N1, M0	1		infiltrating ductal carcinoma	8500/3: Infiltrating duct carcinoma, NOS	2	3	Poorly differentiated						27.5143	8.53468	18.9796	19.124
Jill	10-07-08 Samples 26-29s-17-20	D8	T066004	Invasive Carcinoma	HMBS-Hs00609297_m1	2	WVUTB	46	IIA, T2, N1, M0		T2, N1, M0	1		infiltrating ductal carcinoma	8500/3: Infiltrating duct carcinoma, NOS	2	3	Poorly differentiated						27.713	8.53468	19.1784
Jill	10-07-08 Samples 26-29s-17-20	D9	T066004	Invasive Carcinoma	HMBS-Hs00609297_m1	3	WVUTB	46	IIA, T2, N1, M0		T2, N1, M0	1		infiltrating ductal carcinoma	8500/3: Infiltrating duct carcinoma, NOS	2	3	Poorly differentiated						27.7486	8.53468	19.214
Jill	10-07-08 Samples 30-33s-21-24	L7	T069213	Invasive Carcinoma	HMBS-Hs00609297_m1	1	WVUTB	80	1, T1, N0, M0		T1, N0, M0	0		invasive pleomorphic lobular carcinoma	8524/3: Infiltrating lobular mixed with other types of ca.	1	3	Poorly differentiated						27.16	7.49955	19.6604	19.5452
Jill	10-07-08 Samples 30-33s-21-24	L8	T069213	Invasive Carcinoma	HMBS-Hs00609297_m1	2	WVUTB	80	1, T1, N0, M0		T1, N0, M0	0		invasive pleomorphic lobular carcinoma	8524/3: Infiltrating lobular mixed with other types of ca.	1	3	Poorly differentiated						27.0514	7.49955	19.5519
Jill	10-07-08 Samples 30-33s-21-24	L9	T069213	Invasive Carcinoma	HMBS-Hs00609297_m1	3	WVUTB	80	1, T1, N0, M0		T1, N0, M0	0		invasive pleomorphic lobular carcinoma	8524/3: Infiltrating lobular mixed with other types of ca.	1	3	Poorly differentiated						26.9228	7.49955	19.4232
2 RebeccaRepeat	Br 2 LDA 11-10-09 Plate 1	D12	T07-086-004	Invasive Carcinoma	HMBS-Hs00609297_m1	1	WVUTB	45	pT1c, pN0(i-), pM0	1	pT1c, pN0(i-), pM0	0	F	Invasive ductal carcinoma	8500/3: Infiltrating duct carcinoma, NOS	1	3	Poorly differentiated	Frozen	positive / positive	negative			33.3284	28.6578	4.67053	6.79186
2 RebeccaRepeat	Br 2 LDA 11-10-09 Plate 1	D10	T07-086-004	Invasive Carcinoma	HMBS-Hs00609297_m1	2	WVUTB	45	pT1c, pN0(i-), pM0	1	pT1c, pN0(i-), pM0	0	F	Invasive ductal carcinoma	8500/3: Infiltrating duct carcinoma, NOS	1	3	Poorly differentiated	Frozen	positive / positive	negative			35.9049	28.6578	7.24701
2 RebeccaRepeat	Br 2 LDA 11-10-09 Plate 1	D11	T07-086-004	Invasive Carcinoma	HMBS-Hs00609297_m1	3	WVUTB	45	pT1c, pN0(i-), pM0	1	pT1c, pN0(i-), pM0	0	F	Invasive ductal carcinoma	8500/3: Infiltrating duct carcinoma, NOS	1	3	Poorly differentiated	Frozen	positive / positive	negative			37.1159	28.6578	8.45805
Jill	10-09-08 Samples 46-49s37-40	D7	T0714312	Invasive Carcinoma	HMBS-Hs00609297_m1	1	WVUTB	42	IIA;T2,N0,M0		T2,N0,M0	0		recurrent/residual infiltrating ductal adenocarcinoma with an extensive intraductal component	8500/3: Infiltrating duct carcinoma, NOS	2	3	Poorly differentiated						25.5708	6.7503	18.8206	18.8373
Jill	10-09-08 Samples 46-49s37-40	D8	T0714312	Invasive Carcinoma	HMBS-Hs00609297_m1	2	WVUTB	42	IIA;T2,N0,M0		T2,N0,M0	0		recurrent/residual infiltrating ductal adenocarcinoma with an extensive intraductal component	8500/3: Infiltrating duct carcinoma, NOS	2	3	Poorly differentiated						25.3869	6.7503	18.6366
Jill	10-09-08 Samples 46-49s37-40	D9	T0714312	Invasive Carcinoma	HMBS-Hs00609297_m1	3	WVUTB	42	IIA;T2,N0,M0		T2,N0,M0	0		recurrent/residual infiltrating ductal adenocarcinoma with an extensive intraductal component	8500/3: Infiltrating duct carcinoma, NOS	2	3	Poorly differentiated						25.805	6.7503	19.0547
Jill	10-09-08 Samples 46-49s37-40	P7	T071626	Invasive Carcinoma	HMBS-Hs00609297_m1	1	WVUTB	69	IV, pT3, pN1a, pM0		pT3, pN1a, pM0	1		invasive ductal carcinoma	8500/3: Infiltrating duct carcinoma, NOS	3	3	Poorly differentiated						23.863	6.71873	17.1443	17.5793
Jill	10-09-08 Samples 46-49s37-40	P8	T071626	Invasive Carcinoma	HMBS-Hs00609297_m1	2	WVUTB	69	IV, pT3, pN1a, pM0		pT3, pN1a, pM0	1		invasive ductal carcinoma	8500/3: Infiltrating duct carcinoma, NOS	3	3	Poorly differentiated						24.505	6.71873	17.7863
Jill	10-09-08 Samples 46-49s37-40	P9	T071626	Invasive Carcinoma	HMBS-Hs00609297_m1	3	WVUTB	69	IV, pT3, pN1a, pM0		pT3, pN1a, pM0	1		invasive ductal carcinoma	8500/3: Infiltrating duct carcinoma, NOS	3	3	Poorly differentiated						24.526	6.71873	17.8073
Jill	10-09-08 Samples 50-53s40-44	P7	T0717210	Invasive Carcinoma	HMBS-Hs00609297_m1	1	WVUTB	50	IIIB,pT2, pN2a, pM0		pT2, pN2a, pM0	1		invasive ductal carcinoma	8500/3: Infiltrating duct carcinoma, NOS	3	2	Moderately differentiated						27.7765	7.90212	19.8744	19.9231
Jill	10-09-08 Samples 50-53s40-44	P8	T0717210	Invasive Carcinoma	HMBS-Hs00609297_m1	2	WVUTB	50	IIIB,pT2, pN2a, pM0		pT2, pN2a, pM0	1		invasive ductal carcinoma	8500/3: Infiltrating duct carcinoma, NOS	3	2	Moderately differentiated						27.8949	7.90212	19.9928
Jill	10-09-08 Samples 50-53s40-44	P9	T0717210	Invasive Carcinoma	HMBS-Hs00609297_m1	3	WVUTB	50	IIIB,pT2, pN2a, pM0		pT2, pN2a, pM0	1		invasive ductal carcinoma	8500/3: Infiltrating duct carcinoma, NOS	3	2	Moderately differentiated						27.8042	7.90212	19.9021
Jill	10-07-08 Samples 26-29s-17-20	L7	T071976	Invasive Carcinoma	HMBS-Hs00609297_m1	1	WVUTB	43	IIIA;T3,N1,M0		T3,N1,M0	1		resdiual, invasive infiltrating ductal carcinoma	8500/3: Infiltrating duct carcinoma, NOS	3	3	Poorly differentiated						24.581	5.98754	18.5935	18.3631
Jill	10-07-08 Samples 26-29s-17-20	L8	T071976	Invasive Carcinoma	HMBS-Hs00609297_m1	2	WVUTB	43	IIIA;T3,N1,M0		T3,N1,M0	1		resdiual, invasive infiltrating ductal carcinoma	8500/3: Infiltrating duct carcinoma, NOS	3	3	Poorly differentiated						24.1443	5.98754	18.1568
Jill	10-07-08 Samples 26-29s-17-20	L9	T071976	Invasive Carcinoma	HMBS-Hs00609297_m1	3	WVUTB	43	IIIA;T3,N1,M0		T3,N1,M0	1		resdiual, invasive infiltrating ductal carcinoma	8500/3: Infiltrating duct carcinoma, NOS	3	3	Poorly differentiated						24.3265	5.98754	18.339
Jill	10-08-08 Samples 42-45s32-36	P7	T07593	Invasive Carcinoma	HMBS-Hs00609297_m1	1	WVUTB	67	IIB,pT2, pN1b, pM0		pT2, pN1b, pM0	1		invasive ductal carcinoma	8500/3: Infiltrating duct carcinoma, NOS	2	2	Moderately differentiated						25.2126	6.63636	18.5762	18.6444
Jill	10-08-08 Samples 42-45s32-36	P8	T07593	Invasive Carcinoma	HMBS-Hs00609297_m1	2	WVUTB	67	IIB,pT2, pN1b, pM0		pT2, pN1b, pM0	1		invasive ductal carcinoma	8500/3: Infiltrating duct carcinoma, NOS	2	2	Moderately differentiated						25.2992	6.63636	18.6628
Jill	10-08-08 Samples 42-45s32-36	P9	T07593	Invasive Carcinoma	HMBS-Hs00609297_m1	3	WVUTB	67	IIB,pT2, pN1b, pM0		pT2, pN1b, pM0	1		invasive ductal carcinoma	8500/3: Infiltrating duct carcinoma, NOS	2	2	Moderately differentiated						25.3305	6.63636	18.6942
Jill	10-07-08 Samples 30-33s-21-24	H7	T07818	Invasive Carcinoma	HMBS-Hs00609297_m1	1	WVUTB	43	IIB, T2 N1 M0		T2 N1 M0	1		invasive ductal carcinoma	8500/3: Infiltrating duct carcinoma, NOS	2	3	Poorly differentiated						27.9692	9.34579	18.6235	18.6272
Jill	10-07-08 Samples 30-33s-21-24	H8	T07818	Invasive Carcinoma	HMBS-Hs00609297_m1	2	WVUTB	43	IIB, T2 N1 M0		T2 N1 M0	1		invasive ductal carcinoma	8500/3: Infiltrating duct carcinoma, NOS	2	3	Poorly differentiated						27.8895	9.34579	18.5437
Jill	10-07-08 Samples 30-33s-21-24	H9	T07818	Invasive Carcinoma	HMBS-Hs00609297_m1	3	WVUTB	43	IIB, T2 N1 M0		T2 N1 M0	1		invasive ductal carcinoma	8500/3: Infiltrating duct carcinoma, NOS	2	3	Poorly differentiated						28.0604	9.34579	18.7146
RebeccaRepeat	Br 2 LDA 9-25-09 Plate 1	L11	T09-013-004	Invasive Carcinoma	HMBS-Hs00609297_m1	1	WVUTB	68	T1, N0, M0	1	T1, N0, M0	0	F	Invasive ductal carcinoma	8500/3: Infiltrating duct carcinoma, NOS	1	2	Moderately differentiated	Frozen	positive/positive	negative	Post menopausal		27.8937	9.49052	18.4031	18.454
RebeccaRepeat	Br 2 LDA 9-25-09 Plate 1	L10	T09-013-004	Invasive Carcinoma	HMBS-Hs00609297_m1	2	WVUTB	68	T1, N0, M0	1	T1, N0, M0	0	F	Invasive ductal carcinoma	8500/3: Infiltrating duct carcinoma, NOS	1	2	Moderately differentiated	Frozen	positive/positive	negative	Post menopausal		27.9126	9.49052	18.4221
RebeccaRepeat	Br 2 LDA 9-25-09 Plate 1	L12	T09-013-004	Invasive Carcinoma	HMBS-Hs00609297_m1	3	WVUTB	68	T1, N0, M0	1	T1, N0, M0	0	F	Invasive ductal carcinoma	8500/3: Infiltrating duct carcinoma, NOS	1	2	Moderately differentiated	Frozen	positive/positive	negative	Post menopausal		28.0272	9.49052	18.5367
RebeccaRepeat	Br 2 LDA 9-28-09 Plate 2	H11	T09-023-003	Invasive Carcinoma	HMBS-Hs00609297_m1	1	WVUTB	56	pT1c, pN0(i-), pM0	1	pT1c, pN0(i-), pM0	0	F	Invasive ductal adenocarcinoma	8500/3: Infiltrating duct carcinoma, NOS	1	2	Moderately differentiated	Frozen	positive/positive	positive	Post menopausal		30.1101	11.0381	19.072	19.3434
RebeccaRepeat	Br 2 LDA 9-28-09 Plate 2	H10	T09-023-003	Invasive Carcinoma	HMBS-Hs00609297_m1	2	WVUTB	56	pT1c, pN0(i-), pM0	1	pT1c, pN0(i-), pM0	0	F	Invasive ductal adenocarcinoma	8500/3: Infiltrating duct carcinoma, NOS	1	2	Moderately differentiated	Frozen	positive/positive	positive	Post menopausal		30.2517	11.0381	19.2136
RebeccaRepeat	Br 2 LDA 9-28-09 Plate 2	H12	T09-023-003	Invasive Carcinoma	HMBS-Hs00609297_m1	3	WVUTB	56	pT1c, pN0(i-), pM0	1	pT1c, pN0(i-), pM0	0	F	Invasive ductal adenocarcinoma	8500/3: Infiltrating duct carcinoma, NOS	1	2	Moderately differentiated	Frozen	positive/positive	positive	Post menopausal		30.7828	11.0381	19.7446
RebeccaRepeat	Br 2 LDA 9-28-09 Plate 2	P10	T09-034-002	Invasive Carcinoma	HMBS-Hs00609297_m1	1	WVUTB	51	pT1c, pN0, pM0	1	pT1c, pN0, pM0	0	F	Invasive lobular carcinoma	8524/3: Infiltrating lobular mixed with other types of ca.	1	2	Moderately differentiated	Frozen	positive/positive	negative	perimenopausal		29.7067	10.7996	18.9071	19.2213
RebeccaRepeat	Br 2 LDA 9-28-09 Plate 2	P12	T09-034-002	Invasive Carcinoma	HMBS-Hs00609297_m1	2	WVUTB	51	pT1c, pN0, pM0	1	pT1c, pN0, pM0	0	F	Invasive lobular carcinoma	8524/3: Infiltrating lobular mixed with other types of ca.	1	2	Moderately differentiated	Frozen	positive/positive	negative	perimenopausal		30.1459	10.7996	19.3463
RebeccaRepeat	Br 2 LDA 9-28-09 Plate 2	P11	T09-034-002	Invasive Carcinoma	HMBS-Hs00609297_m1	3	WVUTB	51	pT1c, pN0, pM0	1	pT1c, pN0, pM0	0	F	Invasive lobular carcinoma	8524/3: Infiltrating lobular mixed with other types of ca.	1	2	Moderately differentiated	Frozen	positive/positive	negative	perimenopausal		30.2101	10.7996	19.4106
2 RebeccaRepeat	Br 2 LDA 11-16-09 Plate 1	L10	T09-035-001	Invasive Carcinoma	HMBS-Hs00609297_m1	1	WVUTB	78	pT2, pN0(i-), pM0	2A	pT2, pN0(i-), pM0	0	F	Invasive lobular carcinoma	8524/3: Infiltrating lobular mixed with other types of ca.	2	2	Moderately differentiated	Frozen	positive/negative	negative	Post menopausal		33.9697	29.0066	4.96313	5.33259
2 RebeccaRepeat	Br 2 LDA 11-16-09 Plate 1	L11	T09-035-001	Invasive Carcinoma	HMBS-Hs00609297_m1	2	WVUTB	78	pT2, pN0(i-), pM0	2A	pT2, pN0(i-), pM0	0	F	Invasive lobular carcinoma	8524/3: Infiltrating lobular mixed with other types of ca.	2	2	Moderately differentiated	Frozen	positive/negative	negative	Post menopausal		34.3651	29.0066	5.35849
2 RebeccaRepeat	Br 2 LDA 11-16-09 Plate 1	L12	T09-035-001	Invasive Carcinoma	HMBS-Hs00609297_m1	3	WVUTB	78	pT2, pN0(i-), pM0	2A	pT2, pN0(i-), pM0	0	F	Invasive lobular carcinoma	8524/3: Infiltrating lobular mixed with other types of ca.	2	2	Moderately differentiated	Frozen	positive/negative	negative	Post menopausal		34.6827	29.0066	5.67616
2 RebeccaRepeat	Br 2 LDA 11-18-09 Plate 2	D10	T09-047-003	Invasive Carcinoma	HMBS-Hs00609297_m1	1	WVUTB	51	pT1c pN0(i-),pM0	1A	pT1c pN0(i-),pM0	0	F	Mucinous carcinoma	8480/3: Mucinous adenocarcinoma	1	2	Moderately differentiated	Frozen	positive/positive	negative			28.7676	9.77874	18.9889	19.0702
2 RebeccaRepeat	Br 2 LDA 11-18-09 Plate 2	D11	T09-047-003	Invasive Carcinoma	HMBS-Hs00609297_m1	2	WVUTB	51	pT1c pN0(i-),pM0	1A	pT1c pN0(i-),pM0	0	F	Mucinous carcinoma	8480/3: Mucinous adenocarcinoma	1	2	Moderately differentiated	Frozen	positive/positive	negative			28.8688	9.77874	19.0901
2 RebeccaRepeat	Br 2 LDA 11-18-09 Plate 2	D12	T09-047-003	Invasive Carcinoma	HMBS-Hs00609297_m1	3	WVUTB	51	pT1c pN0(i-),pM0	1A	pT1c pN0(i-),pM0	0	F	Mucinous carcinoma	8480/3: Mucinous adenocarcinoma	1	2	Moderately differentiated	Frozen	positive/positive	negative			28.9105	9.77874	19.1317
2 RebeccaRepeat	Br 2 LDA 11-18-09 Plate 2	L10	T09-064-001	Invasive Carcinoma	HMBS-Hs00609297_m1	1	WVUTB	44	pT1c, N1a, M0	2A	pT1c, N1a, M0	1	F	Invasive ductal carcinoma	8500/3: Infiltrating duct carcinoma, NOS	2	2	Moderately differentiated	Frozen	positive/positive	negative	Pre menopausal		29.4891	10.4652	19.0239	19.2402
2 RebeccaRepeat	Br 2 LDA 11-18-09 Plate 2	L12	T09-064-001	Invasive Carcinoma	HMBS-Hs00609297_m1	2	WVUTB	44	pT1c, N1a, M0	2A	pT1c, N1a, M0	1	F	Invasive ductal carcinoma	8500/3: Infiltrating duct carcinoma, NOS	2	2	Moderately differentiated	Frozen	positive/positive	negative	Pre menopausal		29.6994	10.4652	19.2342
2 RebeccaRepeat	Br 2 LDA 11-18-09 Plate 2	L11	T09-064-001	Invasive Carcinoma	HMBS-Hs00609297_m1	3	WVUTB	44	pT1c, N1a, M0	2A	pT1c, N1a, M0	1	F	Invasive ductal carcinoma	8500/3: Infiltrating duct carcinoma, NOS	2	2	Moderately differentiated	Frozen	positive/positive	negative	Pre menopausal		29.9278	10.4652	19.4626
RebeccaRepeat	Br 2 LDA 9-28-09 Plate 1	P12	T09-089-001	Invasive Carcinoma	HMBS-Hs00609297_m1	1	WVUTB	62	pT1c, N0, M0	1A	pT1c, N0, M0	0	F	Residual infiltrating ductal carcinoma	8500/3: Infiltrating duct carcinoma, NOS	1	2	Moderately differentiated	Frozen	positive/negative	positive			29.078	10.9515	18.1265	18.1743
RebeccaRepeat	Br 2 LDA 9-28-09 Plate 1	P11	T09-089-001	Invasive Carcinoma	HMBS-Hs00609297_m1	2	WVUTB	62	pT1c, N0, M0	1A	pT1c, N0, M0	0	F	Residual infiltrating ductal carcinoma	8500/3: Infiltrating duct carcinoma, NOS	1	2	Moderately differentiated	Frozen	positive/negative	positive			29.1254	10.9515	18.1739
RebeccaRepeat	Br 2 LDA 9-28-09 Plate 1	P10	T09-089-001	Invasive Carcinoma	HMBS-Hs00609297_m1	3	WVUTB	62	pT1c, N0, M0	1A	pT1c, N0, M0	0	F	Residual infiltrating ductal carcinoma	8500/3: Infiltrating duct carcinoma, NOS	1	2	Moderately differentiated	Frozen	positive/negative	positive			29.174	10.9515	18.2225
Rebecca	Br 2 LDA 12-7-09 Plate 1	L10	T09-122-007	Invasive Carcinoma	HMBS-Hs00609297_m1	1	WVUTB	51	T2,N0,M0	2A	T2,N0,M0	0	F	Infiltrating Ductal Carcinoma	8500/3: Infiltrating duct carcinoma, NOS	2	3	Poorly Differentiated	Frozen	positive/positive	positive			28.3529	9.32693	19.026	19.0835
Rebecca	Br 2 LDA 12-7-09 Plate 1	L11	T09-122-007	Invasive Carcinoma	HMBS-Hs00609297_m1	2	WVUTB	51	T2,N0,M0	2A	T2,N0,M0	0	F	Infiltrating Ductal Carcinoma	8500/3: Infiltrating duct carcinoma, NOS	2	3	Poorly Differentiated	Frozen	positive/positive	positive			28.5244	9.32693	19.1975
Rebecca	Br 2 LDA 12-7-09 Plate 1	L12	T09-122-007	Invasive Carcinoma	HMBS-Hs00609297_m1	3	WVUTB	51	T2,N0,M0	2A	T2,N0,M0	0	F	Infiltrating Ductal Carcinoma	8500/3: Infiltrating duct carcinoma, NOS	2	3	Poorly Differentiated	Frozen	positive/positive	positive			28.354	9.32693	19.0271
2 RebeccaRepeat	Br 2 LDA 11-18-09 Plate 2	P10	T09-138-002	Invasive Carcinoma	HMBS-Hs00609297_m1	1	WVUTB	70	T2pN0M0	2A	T2pN0M0	0	F	Infiltrating Ductal Carcinoma	8500/3: Infiltrating duct carcinoma, NOS	2	3	Poorly Differentiated	Frozen	negative/negative	negative	Post menopausal		26.6436	8.82736	17.8162	17.8806
2 RebeccaRepeat	Br 2 LDA 11-18-09 Plate 2	P11	T09-138-002	Invasive Carcinoma	HMBS-Hs00609297_m1	2	WVUTB	70	T2pN0M0	2A	T2pN0M0	0	F	Infiltrating Ductal Carcinoma	8500/3: Infiltrating duct carcinoma, NOS	2	3	Poorly Differentiated	Frozen	negative/negative	negative	Post menopausal		26.7222	8.82736	17.8948
2 RebeccaRepeat	Br 2 LDA 11-18-09 Plate 2	P12	T09-138-002	Invasive Carcinoma	HMBS-Hs00609297_m1	3	WVUTB	70	T2pN0M0	2A	T2pN0M0	0	F	Infiltrating Ductal Carcinoma	8500/3: Infiltrating duct carcinoma, NOS	2	3	Poorly Differentiated	Frozen	negative/negative	negative	Post menopausal		26.7581	8.82736	17.9307
Rebecca	Br 2 LDA 12-7-09 Plate 1	P10	T09-141-002	Invasive Carcinoma	HMBS-Hs00609297_m1	1	WVUTB	75	pT2pN1aM0	2B	pT2pN1aM0	1	F	Invasive ductal carcinoma	8500/3: Infiltrating duct carcinoma, NOS	2	3	Poorly Differentiated	Frozen	negative/negative	negative	Post menopausal		28.8933	8.92162	19.9716	19.979
Rebecca	Br 2 LDA 12-7-09 Plate 1	P11	T09-141-002	Invasive Carcinoma	HMBS-Hs00609297_m1	2	WVUTB	75	pT2pN1aM0	2B	pT2pN1aM0	1	F	Invasive ductal carcinoma	8500/3: Infiltrating duct carcinoma, NOS	2	3	Poorly Differentiated	Frozen	negative/negative	negative	Post menopausal		28.8925	8.92162	19.9708
Rebecca	Br 2 LDA 12-7-09 Plate 1	P12	T09-141-002	Invasive Carcinoma	HMBS-Hs00609297_m1	3	WVUTB	75	pT2pN1aM0	2B	pT2pN1aM0	1	F	Invasive ductal carcinoma	8500/3: Infiltrating duct carcinoma, NOS	2	3	Poorly Differentiated	Frozen	negative/negative	negative	Post menopausal		28.9162	8.92162	19.9946
Rebecca	Br 2 LDA 12-7-09 Plate 1	H10	T09-142-003	Invasive Carcinoma	HMBS-Hs00609297_m1	1	WVUTB	37	pT2N3aM0	3C	pT2N3aM0	1	F	Infiltrating Ductal Carcinoma	8500/3: Infiltrating duct carcinoma, NOS	3	3	Poorly Differentiated	Frozen	negative/negative	negative			27.7135	9.15739	18.5561	18.4941
Rebecca	Br 2 LDA 12-7-09 Plate 1	H11	T09-142-003	Invasive Carcinoma	HMBS-Hs00609297_m1	2	WVUTB	37	pT2N3aM0	3C	pT2N3aM0	1	F	Infiltrating Ductal Carcinoma	8500/3: Infiltrating duct carcinoma, NOS	3	3	Poorly Differentiated	Frozen	negative/negative	negative			27.5759	9.15739	18.4185
Rebecca	Br 2 LDA 12-7-09 Plate 1	H12	T09-142-003	Invasive Carcinoma	HMBS-Hs00609297_m1	3	WVUTB	37	pT2N3aM0	3C	pT2N3aM0	1	F	Infiltrating Ductal Carcinoma	8500/3: Infiltrating duct carcinoma, NOS	3	3	Poorly Differentiated	Frozen	negative/negative	negative			27.665	9.15739	18.5077
Rebecca	Br 2 LDA 12-7-09 Plate 1	D10	T09-150-004	Invasive Carcinoma	HMBS-Hs00609297_m1	1	WVUTB	82	pT2N1aM0	2B	pT2N1aM0	1	F	Invasive Ductal Carcinoma	8500/3: Infiltrating duct carcinoma, NOS	2	2	Moderately Differentiated	Frozen	positive/positive	negative	Post menopausal		29.3929	10.3239	19.0689	19.1361
Rebecca	Br 2 LDA 12-7-09 Plate 1	D11	T09-150-004	Invasive Carcinoma	HMBS-Hs00609297_m1	2	WVUTB	82	pT2N1aM0	2B	pT2N1aM0	1	F	Invasive Ductal Carcinoma	8500/3: Infiltrating duct carcinoma, NOS	2	2	Moderately Differentiated	Frozen	positive/positive	negative	Post menopausal		29.4546	10.3239	19.1307
Rebecca	Br 2 LDA 12-7-09 Plate 1	D12	T09-150-004	Invasive Carcinoma	HMBS-Hs00609297_m1	3	WVUTB	82	pT2N1aM0	2B	pT2N1aM0	1	F	Invasive Ductal Carcinoma	8500/3: Infiltrating duct carcinoma, NOS	2	2	Moderately Differentiated	Frozen	positive/positive	negative	Post menopausal		29.5328	10.3239	19.2088
RebeccaRepeat	Br 2 LDA 9-25-09 Plate 1	P10	Z3588A1B	Invasive Carcinoma	HMBS-Hs00609297_m1	1	CHTN	NA	pT3, pN1, M1	4	pT3, pN1, M1	1	missing	Invasive Ductal Carcinoma	8500/3: Infiltrating duct carcinoma, NOS	4	3	Poorly Differentiated	Frozen & Paraffin					29.2187	10.0368	19.1819	19.2348
RebeccaRepeat	Br 2 LDA 9-25-09 Plate 1	P12	Z3588A1B	Invasive Carcinoma	HMBS-Hs00609297_m1	2	CHTN	NA	pT3, pN1, M1	4	pT3, pN1, M1	1	missing	Invasive Ductal Carcinoma	8500/3: Infiltrating duct carcinoma, NOS	4	3	Poorly Differentiated	Frozen & Paraffin					29.2957	10.0368	19.2588
RebeccaRepeat	Br 2 LDA 9-25-09 Plate 1	P11	Z3588A1B	Invasive Carcinoma	HMBS-Hs00609297_m1	3	CHTN	NA	pT3, pN1, M1	4	pT3, pN1, M1	1	missing	Invasive Ductal Carcinoma	8500/3: Infiltrating duct carcinoma, NOS	4	3	Poorly Differentiated	Frozen & Paraffin					29.3006	10.0368	19.2638
2 RebeccaRepeat	Br 2 LDA 11-9-09 Plate 1	H12	Z3740A1A	Invasive Carcinoma	HMBS-Hs00609297_m1	1	CHTN	Missing	T3N0M0	2B	T3N0M0	0	missing	Metaplastic carcinoma with chondrosarcomatous elements	8010/3: Carcinoma, NOS	2	3	Poorly differentiated						30.6844	19.9441	10.7402	11.0361
2 RebeccaRepeat	Br 2 LDA 11-9-09 Plate 1	H11	Z3740A1A	Invasive Carcinoma	HMBS-Hs00609297_m1	2	CHTN	Missing	T3N0M0	2B	T3N0M0	0	missing	Metaplastic carcinoma with chondrosarcomatous elements	8010/3: Carcinoma, NOS	2	3	Poorly differentiated						31.0635	19.9441	11.1194
2 RebeccaRepeat	Br 2 LDA 11-9-09 Plate 1	H10	Z3740A1A	Invasive Carcinoma	HMBS-Hs00609297_m1	3	CHTN	Missing	T3N0M0	2B	T3N0M0	0	missing	Metaplastic carcinoma with chondrosarcomatous elements	8010/3: Carcinoma, NOS	2	3	Poorly differentiated						31.1928	19.9441	11.2486
2 RebeccaRepeat	Br 2 LDA 11-9-09 Plate 1	L11	Z3841A1A	Invasive Carcinoma	HMBS-Hs00609297_m1	1	CHTN	Missing	T2N0M0	2A	T2N0M0	0	missing	Invasive Ductal Carcinoma	8500/3: Infiltrating duct carcinoma, NOS	2	3	Poorly Differentiated	Frozen & Paraffin	ordered	ordered			31.7816	19.6333	12.1483	12.257
2 RebeccaRepeat	Br 2 LDA 11-9-09 Plate 1	L12	Z3841A1A	Invasive Carcinoma	HMBS-Hs00609297_m1	2	CHTN	Missing	T2N0M0	2A	T2N0M0	0	missing	Invasive Ductal Carcinoma	8500/3: Infiltrating duct carcinoma, NOS	2	3	Poorly Differentiated	Frozen & Paraffin	ordered	ordered			31.902	19.6333	12.2687
2 RebeccaRepeat	Br 2 LDA 11-9-09 Plate 1	L10	Z3841A1A	Invasive Carcinoma	HMBS-Hs00609297_m1	3	CHTN	Missing	T2N0M0	2A	T2N0M0	0	missing	Invasive Ductal Carcinoma	8500/3: Infiltrating duct carcinoma, NOS	2	3	Poorly Differentiated	Frozen & Paraffin	ordered	ordered			31.9873	19.6333	12.354
RebeccaLast	Br 2 LDA 1-7-10 Plate 1	D10	Z4142 A1F	Invasive Carcinoma	HMBS-Hs00609297_m1	1	CHTN	NA	T3N1M0	3A	T3N1M0	1	F	Invasive Ductal Carcinoma	8500/3: Infiltrating duct carcinoma, NOS	3	3	Poorly Differentiated	Frozen & Paraffin	positive/positive	positive			31.5954	13.2076	18.3878	18.6845
RebeccaLast	Br 2 LDA 1-7-10 Plate 1	D11	Z4142 A1F	Invasive Carcinoma	HMBS-Hs00609297_m1	2	CHTN	NA	T3N1M0	3A	T3N1M0	1	F	Invasive Ductal Carcinoma	8500/3: Infiltrating duct carcinoma, NOS	3	3	Poorly Differentiated	Frozen & Paraffin	positive/positive	positive			32.0566	13.2076	18.849
RebeccaLast	Br 2 LDA 1-7-10 Plate 1	D12	Z4142 A1F	Invasive Carcinoma	HMBS-Hs00609297_m1	3	CHTN	NA	T3N1M0	3A	T3N1M0	1	F	Invasive Ductal Carcinoma	8500/3: Infiltrating duct carcinoma, NOS	3	3	Poorly Differentiated	Frozen & Paraffin	positive/positive	positive			32.0244	13.2076	18.8168
Jill	10-06-08 Samples 22-25Maricicass12-16	L7	1060163B3	normal	HMBS-Hs00609297_m1	1	CHTN	65				normal				normal								27.7513	7.6645	20.0868	20.1965	19.0704	1.21278
Jill	10-06-08 Samples 22-25Maricicass12-16	L8	1060163B3	normal	HMBS-Hs00609297_m1	2	CHTN	65				normal				normal								27.8255	7.6645	20.161
Jill	10-06-08 Samples 22-25Maricicass12-16	L9	1060163B3	normal	HMBS-Hs00609297_m1	3	CHTN	65				normal				normal								28.0061	7.6645	20.3416
Rebecca	Br 2 LDA 8-27-09 Plate 1	D11	3061119C4	normal	HMBS-Hs00609297_m1	1	CHTN	74				normal	F			normal			Frozen					28.9745	10.5695	18.4049	18.5976
Rebecca	Br 2 LDA 8-27-09 Plate 1	D10	3061119C4	normal	HMBS-Hs00609297_m1	2	CHTN	74				normal	F			normal			Frozen					29.2578	10.5695	18.6883
Rebecca	Br 2 LDA 8-27-09 Plate 1	D12	3061119C4	normal	HMBS-Hs00609297_m1	3	CHTN	74				normal	F			normal			Frozen					29.2691	10.5695	18.6996
Rebecca	Br 2 LDA 8-21-09 Plate 1	H10	3062104B6	normal	HMBS-Hs00609297_m1	1	CHTN	52				normal	F			normal								28.1386	9.61416	18.5245	18.5816
Rebecca	Br 2 LDA 8-21-09 Plate 1	H12	3062104B6	normal	HMBS-Hs00609297_m1	2	CHTN	52				normal	F			normal								28.2088	9.61416	18.5947
Rebecca	Br 2 LDA 8-21-09 Plate 1	H11	3062104B6	normal	HMBS-Hs00609297_m1	3	CHTN	52				normal	F			normal								28.2398	9.61416	18.6257
Rebecca	Br 2 LDA 8-25-09 Plate 1	L12	4060634B10	normal	HMBS-Hs00609297_m1	1	CHTN	79				normal	F			normal			Frozen					29.7819	10.8951	18.8867	18.9405
Rebecca	Br 2 LDA 8-25-09 Plate 1	L10	4060634B10	normal	HMBS-Hs00609297_m1	2	CHTN	79				normal	F			normal			Frozen					29.7971	10.8951	18.902
Rebecca	Br 2 LDA 8-25-09 Plate 1	L11	4060634B10	normal	HMBS-Hs00609297_m1	3	CHTN	79				normal	F			normal			Frozen					29.9279	10.8951	19.0327
Rebecca	Br 2 LDA 8-25-09 Plate 1	D10	T07-081-003	normal	HMBS-Hs00609297_m1	1	WVUTB	40				normal	F			normal								30.3219	10.489	19.8328	20.0105
Rebecca	Br 2 LDA 8-25-09 Plate 1	D12	T07-081-003	normal	HMBS-Hs00609297_m1	2	WVUTB	40				normal	F			normal								30.4488	10.489	19.9598
Rebecca	Br 2 LDA 8-25-09 Plate 1	D11	T07-081-003	normal	HMBS-Hs00609297_m1	3	WVUTB	40				normal	F			normal								30.7279	10.489	20.2389
Rebecca	Br 2 LDA 8-25-09 Plate 1	H11	T07-197-003	normal	HMBS-Hs00609297_m1	1	WVUTB	43				normal	F			normal			Frozen					30.3174	10.9588	19.3585	19.4426
Rebecca	Br 2 LDA 8-25-09 Plate 1	H10	T07-197-003	normal	HMBS-Hs00609297_m1	2	WVUTB	43				normal	F			normal			Frozen					30.4199	10.9588	19.461
Rebecca	Br 2 LDA 8-25-09 Plate 1	H12	T07-197-003	normal	HMBS-Hs00609297_m1	3	WVUTB	43				normal	F			normal			Frozen					30.467	10.9588	19.5082
Rebecca	Br 2 LDA 8-27-09 Plate 1	L10	T09-045-001	normal	HMBS-Hs00609297_m1	1	WVUTB	39				normal	F			normal			Frozen					28.7903	8.89414	19.8961	19.9874
Rebecca	Br 2 LDA 8-27-09 Plate 1	L12	T09-045-001	normal	HMBS-Hs00609297_m1	2	WVUTB	39				normal	F			normal			Frozen					28.8912	8.89414	19.997
Rebecca	Br 2 LDA 8-27-09 Plate 1	L11	T09-045-001	normal	HMBS-Hs00609297_m1	3	WVUTB	39				normal	F			normal			Frozen					28.9631	8.89414	20.0689
Rebecca	Br 2 LDA 8-27-09 Plate 1	P10	T09-047-002	normal	HMBS-Hs00609297_m1	1	WVUTB	51				normal	F			normal			Frozen					28.7593	9.98865	18.7706	18.9409
Rebecca	Br 2 LDA 8-27-09 Plate 1	P11	T09-047-002	normal	HMBS-Hs00609297_m1	2	WVUTB	51				normal	F			normal			Frozen					28.9153	9.98865	18.9267
Rebecca	Br 2 LDA 8-27-09 Plate 1	P12	T09-047-002	normal	HMBS-Hs00609297_m1	3	WVUTB	51				normal	F			normal			Frozen					29.1141	9.98865	19.1254
Rebecca	Br 2 LDA 8-27-09 Plate 1	H10	T09-064-003	normal	HMBS-Hs00609297_m1	1	WVUTB	44				normal	F			normal			Frozen					29.7462	9.73424	20.0119	20.1842
Rebecca	Br 2 LDA 8-27-09 Plate 1	H12	T09-064-003	normal	HMBS-Hs00609297_m1	2	WVUTB	44				normal	F			normal			Frozen					29.8961	9.73424	20.1619
Rebecca	Br 2 LDA 8-27-09 Plate 1	H11	T09-064-003	normal	HMBS-Hs00609297_m1	3	WVUTB	44				normal	F			normal			Frozen					30.113	9.73424	20.3788
Rebecca	Br 2 LDA 12-8-09 Plate 1	P10	T09-089-002	normal	HMBS-Hs00609297_m1	1	WVUTB	62				normal				normal			Frozen					29.9483	12.8687	17.0795	17.1919
Rebecca	Br 2 LDA 12-8-09 Plate 1	P11	T09-089-002	normal	HMBS-Hs00609297_m1	2	WVUTB	62				normal				normal			Frozen					29.8794	12.8687	17.0107
Rebecca	Br 2 LDA 12-8-09 Plate 1	P12	T09-089-002	normal	HMBS-Hs00609297_m1	3	WVUTB	62				normal				normal			Frozen					30.3543	12.8687	17.4855
Rebecca	Br 2 LDA 12-8-09 Plate 1	D10	T09-122-002	normal	HMBS-Hs00609297_m1	1	WVUTB	51				normal				normal			Frozen					28.0284	11.4183	16.6101	16.5356
Rebecca	Br 2 LDA 12-8-09 Plate 1	D11	T09-122-002	normal	HMBS-Hs00609297_m1	2	WVUTB	51				normal				normal			Frozen					27.9165	11.4183	16.4982
Rebecca	Br 2 LDA 12-8-09 Plate 1	D12	T09-122-002	normal	HMBS-Hs00609297_m1	3	WVUTB	51				normal				normal			Frozen					27.9169	11.4183	16.4985
Rebecca	Br 2 LDA 8-24-09 Plate 1	P10	Z3841A2A	normal	HMBS-Hs00609297_m1	1	CHTN	Missing				normal	missing			normal			Frozen & Paraffin					29.9339	9.94032	19.9936	20.2355
Rebecca	Br 2 LDA 8-24-09 Plate 1	P11	Z3841A2A	normal	HMBS-Hs00609297_m1	2	CHTN	Missing				normal	missing			normal			Frozen & Paraffin					30.2657	9.94032	20.3254
Rebecca	Br 2 LDA 8-24-09 Plate 1	P12	Z3841A2A	normal	HMBS-Hs00609297_m1	3	CHTN	Missing				normal	missing			normal			Frozen & Paraffin					30.3278	9.94032	20.3874
2 RebeccaRepeat	Br 2 LDA 11-10-09 Plate 1	P11	1082304A4	Sarcoma	HMBS-Hs00609297_m1	1	CHTN	79	T4, N0,M0	3B	T4, N0,M0	0	F	Spindle Cell Sarcoma	8801/3: Spindle cell sarcoma	3	2	Moderately Differentiated		negative/negative	negative			25.6139	5.72147	19.8924	19.9695	17.6345	3.30214	2.70551	0.648552
2 RebeccaRepeat	Br 2 LDA 11-10-09 Plate 1	P12	1082304A4	Sarcoma	HMBS-Hs00609297_m1	2	CHTN	79	T4, N0,M0	3B	T4, N0,M0	0	F	Spindle Cell Sarcoma	8801/3: Spindle cell sarcoma	3	2	Moderately Differentiated		negative/negative	negative			25.6766	5.72147	19.9551
2 RebeccaRepeat	Br 2 LDA 11-10-09 Plate 1	P10	1082304A4	Sarcoma	HMBS-Hs00609297_m1	3	CHTN	79	T4, N0,M0	3B	T4, N0,M0	0	F	Spindle Cell Sarcoma	8801/3: Spindle cell sarcoma	3	2	Moderately Differentiated		negative/negative	negative			25.7823	5.72147	20.0609
RebeccaRepeat	Br 2 LDA 9-29-09 Plate 1	H12	T04-104-006	Sarcoma	HMBS-Hs00609297_m1	1	WVUTB	56	T4, N0, M0	1	T4, N0, M0	0	F	Recurrent Cystosarcoma Phyllodes		1	N/A	N/A	Frozen					25.0393	10.2202	14.8191	15.2995
RebeccaRepeat	Br 2 LDA 9-29-09 Plate 1	H11	T04-104-006	Sarcoma	HMBS-Hs00609297_m1	2	WVUTB	56	T4, N0, M0	1	T4, N0, M0	0	F	Recurrent Cystosarcoma Phyllodes		1	N/A	N/A	Frozen					25.6918	10.2202	15.4715
RebeccaRepeat	Br 2 LDA 9-29-09 Plate 1	H10	T04-104-006	Sarcoma	HMBS-Hs00609297_m1	3	WVUTB	56	T4, N0, M0	1	T4, N0, M0	0	F	Recurrent Cystosarcoma Phyllodes		1	N/A	N/A	Frozen					25.8282	10.2202	15.6079
Jill	10-09-08 Samples 50-53s40-44	F19	T0426310	DCIS	HSP90AB1-Hs00607336_gH	1	WVUTB	63		0		0		DCIS		0	3	Poorly differentiated						25.43	8.64477	16.7853	16.776	14.6977	2.03247	0.463281	0.448783
Jill	10-09-08 Samples 50-53s40-44	F20	T0426310	DCIS	HSP90AB1-Hs00607336_gH	2	WVUTB	63		0		0		DCIS		0	3	Poorly differentiated						25.4559	8.64477	16.8111
Jill	10-09-08 Samples 50-53s40-44	F21	T0426310	DCIS	HSP90AB1-Hs00607336_gH	3	WVUTB	63		0		0		DCIS		0	3	Poorly differentiated						25.3764	8.64477	16.7316
Jill	10-07-08 Samples 26-29s-17-20	F19	T06449	DCIS	HSP90AB1-Hs00607336_gH	1	WVUTB	56		0		0		DCIS		0	3	Poorly differentiated						22.9601	8.26771	14.6923	14.6028
Jill	10-07-08 Samples 26-29s-17-20	F20	T06449	DCIS	HSP90AB1-Hs00607336_gH	2	WVUTB	56		0		0		DCIS		0	3	Poorly differentiated						22.7955	8.26771	14.5277
Jill	10-07-08 Samples 26-29s-17-20	F21	T06449	DCIS	HSP90AB1-Hs00607336_gH	3	WVUTB	56		0		0		DCIS		0	3	Poorly differentiated						22.8559	8.26771	14.5882
2 RebeccaRepeat	Br 2 LDA 11-18-09 Plate 2	F22	T09-045-003	DCIS	HSP90AB1-Hs00607336_gH	1	WVUTB	39	pTis, pN1mi, pMx	0	pTis, pN1mi, pMx	0	F	DCIS		0	1	Well-Differentiated	Frozen	negative / negative	not addressed			23.1396	10.5131	12.6265	12.7144
2 RebeccaRepeat	Br 2 LDA 11-18-09 Plate 2	F23	T09-045-003	DCIS	HSP90AB1-Hs00607336_gH	2	WVUTB	39	pTis, pN1mi, pMx	0	pTis, pN1mi, pMx	0	F	DCIS		0	1	Well-Differentiated	Frozen	negative / negative	not addressed			23.184	10.5131	12.6709
2 RebeccaRepeat	Br 2 LDA 11-18-09 Plate 2	F24	T09-045-003	DCIS	HSP90AB1-Hs00607336_gH	3	WVUTB	39	pTis, pN1mi, pMx	0	pTis, pN1mi, pMx	0	F	DCIS		0	1	Well-Differentiated	Frozen	negative / negative	not addressed			23.3587	10.5131	12.8457
Jill	10-02-08 Samples 9-12	B19	1060163A9	Invasive Carcinoma	HSP90AB1-Hs00607336_gH	1	CHTN	65	T2N0M0	2A	T2N0M0	0		invasive ductal carcinoma	8500/3: Infiltrating duct carcinoma, NOS	2	3	Poorly differentiated		negative/negative	intermediate: test to be repeated	Postmenopausal		25.5109	9.98487	15.5261	14.8647	13.8877	3.00397	0.812221	0.596012
Jill	10-02-08 Samples 9-12	B20	1060163A9	Invasive Carcinoma	HSP90AB1-Hs00607336_gH	2	CHTN	65	T2N0M0	2A	T2N0M0	0		invasive ductal carcinoma	8500/3: Infiltrating duct carcinoma, NOS	2	3	Poorly differentiated		negative/negative	intermediate: test to be repeated	Postmenopausal		24.418	9.98487	14.4331
Jill	10-02-08 Samples 9-12	B21	1060163A9	Invasive Carcinoma	HSP90AB1-Hs00607336_gH	3	CHTN	65	T2N0M0	2A	T2N0M0	0		invasive ductal carcinoma	8500/3: Infiltrating duct carcinoma, NOS	2	3	Poorly differentiated		negative/negative	intermediate: test to be repeated	Postmenopausal		24.6199	9.98487	14.635
RebeccaRepeat	Br 2 LDA 9-29-09 Plate 1	B22	1060568A18	Invasive Carcinoma	HSP90AB1-Hs00607336_gH	1	CHTN	50	T4, N1, M0	3B	T4, N1, M0	1	F	Invasive ductal carcinoma	8500/3: Infiltrating duct carcinoma, NOS	3	3	Poorly differentiated		positive/negative	negative			24.6455	10.3972	14.2483	14.3327
RebeccaRepeat	Br 2 LDA 9-29-09 Plate 1	B23	1060568A18	Invasive Carcinoma	HSP90AB1-Hs00607336_gH	2	CHTN	50	T4, N1, M0	3B	T4, N1, M0	1	F	Invasive ductal carcinoma	8500/3: Infiltrating duct carcinoma, NOS	3	3	Poorly differentiated		positive/negative	negative			24.7056	10.3972	14.3085
RebeccaRepeat	Br 2 LDA 9-29-09 Plate 1	B24	1060568A18	Invasive Carcinoma	HSP90AB1-Hs00607336_gH	3	CHTN	50	T4, N1, M0	3B	T4, N1, M0	1	F	Invasive ductal carcinoma	8500/3: Infiltrating duct carcinoma, NOS	3	3	Poorly differentiated		positive/negative	negative			24.8384	10.3972	14.4412
Jill	10-06-08 Samples 18-21s-09-12	B19	1060950A1	Invasive Carcinoma	HSP90AB1-Hs00607336_gH	1	CHTN	63	T1cN0M0	1A	T1cN0M0	0		infiltrating ductal carcinoma, cribriform subtype	8500/3: Infiltrating duct carcinoma, NOS	1	1	Well-differentiated		positive/positive	negative			23.3186	6.92383	16.3947	16.5708
Jill	10-06-08 Samples 18-21s-09-12	B20	1060950A1	Invasive Carcinoma	HSP90AB1-Hs00607336_gH	2	CHTN	63	T1cN0M0	1A	T1cN0M0	0		infiltrating ductal carcinoma, cribriform subtype	8500/3: Infiltrating duct carcinoma, NOS	1	1	Well-differentiated		positive/positive	negative			23.8558	6.92383	16.932
Jill	10-06-08 Samples 18-21s-09-12	B21	1060950A1	Invasive Carcinoma	HSP90AB1-Hs00607336_gH	3	CHTN	63	T1cN0M0	1A	T1cN0M0	0		infiltrating ductal carcinoma, cribriform subtype	8500/3: Infiltrating duct carcinoma, NOS	1	1	Well-differentiated		positive/positive	negative			23.3095	6.92383	16.3857
Jill	10-06-08 Samples 13-16-s-08-09	B19	1061053A1	Invasive Carcinoma	HSP90AB1-Hs00607336_gH	1	CHTN	36	T3N1aM0	3A	T3N1aM0	1		infiltrating ductal carcinoma	8500/3: Infiltrating duct carcinoma, NOS	3	2	Moderately differentiated		positive/positive	(+1) probably negative	Premenopausal		21.3348	6.34086	14.9939	15.095
Jill	10-06-08 Samples 13-16-s-08-09	B20	1061053A1	Invasive Carcinoma	HSP90AB1-Hs00607336_gH	2	CHTN	36	T3N1aM0	3A	T3N1aM0	1		infiltrating ductal carcinoma	8500/3: Infiltrating duct carcinoma, NOS	3	2	Moderately differentiated		positive/positive	(+1) probably negative	Premenopausal		21.4701	6.34086	15.1292
Jill	10-06-08 Samples 13-16-s-08-09	B21	1061053A1	Invasive Carcinoma	HSP90AB1-Hs00607336_gH	3	CHTN	36	T3N1aM0	3A	T3N1aM0	1		infiltrating ductal carcinoma	8500/3: Infiltrating duct carcinoma, NOS	3	2	Moderately differentiated		positive/positive	(+1) probably negative	Premenopausal		21.5027	6.34086	15.1618
RebeccaRepeat	Br 2 LDA 9-28-09 Plate 1	B23	1061562A15	Invasive Carcinoma	HSP90AB1-Hs00607336_gH	1	CHTN	60	T2, N0, M0	2A	T2, N0, M0	0	F	Mucinous Adenocarcinoma	8480/3: Mucinous adenocarcinoma	2	1	Well-Differentiated	Frozen & Paraffin	positive/positive	negative			22.505	9.96153	12.5434	12.5892
RebeccaRepeat	Br 2 LDA 9-28-09 Plate 1	B24	1061562A15	Invasive Carcinoma	HSP90AB1-Hs00607336_gH	2	CHTN	60	T2, N0, M0	2A	T2, N0, M0	0	F	Mucinous Adenocarcinoma	8480/3: Mucinous adenocarcinoma	2	1	Well-Differentiated	Frozen & Paraffin	positive/positive	negative			22.5559	9.96153	12.5944
RebeccaRepeat	Br 2 LDA 9-28-09 Plate 1	B22	1061562A15	Invasive Carcinoma	HSP90AB1-Hs00607336_gH	3	CHTN	60	T2, N0, M0	2A	T2, N0, M0	0	F	Mucinous Adenocarcinoma	8480/3: Mucinous adenocarcinoma	2	1	Well-Differentiated	Frozen & Paraffin	positive/positive	negative			22.5912	9.96153	12.6297
Jill	10-06-08 Samples 18-21s-09-12	N19	1061897A3	Invasive Carcinoma	HSP90AB1-Hs00607336_gH	1	CHTN	85	T2N2aM0	3A	T2N2aM0	1		invasive lobular carcinoma	8524/3: Infiltrating lobular mixed with other types of ca.	3	1	Well-differentiated		positive/positive	negative	Postmenopausal		24.2363	7.70997	16.5263	16.7679
Jill	10-06-08 Samples 18-21s-09-12	N20	1061897A3	Invasive Carcinoma	HSP90AB1-Hs00607336_gH	2	CHTN	85	T2N2aM0	3A	T2N2aM0	1		invasive lobular carcinoma	8524/3: Infiltrating lobular mixed with other types of ca.	3	1	Well-differentiated		positive/positive	negative	Postmenopausal		24.3001	7.70997	16.5901
Jill	10-06-08 Samples 18-21s-09-12	N21	1061897A3	Invasive Carcinoma	HSP90AB1-Hs00607336_gH	3	CHTN	85	T2N2aM0	3A	T2N2aM0	1		invasive lobular carcinoma	8524/3: Infiltrating lobular mixed with other types of ca.	3	1	Well-differentiated		positive/positive	negative	Postmenopausal		24.8972	7.70997	17.1872
RebeccaRepeat	Br 2 LDA 9-28-09 Plate 2	B23	1062323A6	Invasive Carcinoma	HSP90AB1-Hs00607336_gH	1	CHTN	62	T2N0M0	2A	T2N0M0	0	F	Infiltrating Ductal Carcinoma	8500/3: Infiltrating duct carcinoma, NOS	2	3	Poorly Differentiated	Frozen & Paraffin	negative/negative	negative			26.0359	8.83488	17.201	17.354
RebeccaRepeat	Br 2 LDA 9-28-09 Plate 2	B22	1062323A6	Invasive Carcinoma	HSP90AB1-Hs00607336_gH	2	CHTN	62	T2N0M0	2A	T2N0M0	0	F	Infiltrating Ductal Carcinoma	8500/3: Infiltrating duct carcinoma, NOS	2	3	Poorly Differentiated	Frozen & Paraffin	negative/negative	negative			26.2604	8.83488	17.4255
RebeccaRepeat	Br 2 LDA 9-28-09 Plate 2	B24	1062323A6	Invasive Carcinoma	HSP90AB1-Hs00607336_gH	3	CHTN	62	T2N0M0	2A	T2N0M0	0	F	Infiltrating Ductal Carcinoma	8500/3: Infiltrating duct carcinoma, NOS	2	3	Poorly Differentiated	Frozen & Paraffin	negative/negative	negative			26.2704	8.83488	17.4355
RebeccaRepeat	Br 2 LDA 9-28-09 Plate 1	F23	1070062A1	Invasive Carcinoma	HSP90AB1-Hs00607336_gH	1	CHTN	49	T2N0M0	2A	T2N0M0	0	F	Ductal Adenocarcinoma	8500/3: Infiltrating duct carcinoma, NOS	2	3	Poorly differentiated		positive/positive	negative			22.0438	9.88308	12.1608	12.233
RebeccaRepeat	Br 2 LDA 9-28-09 Plate 1	F22	1070062A1	Invasive Carcinoma	HSP90AB1-Hs00607336_gH	2	CHTN	49	T2N0M0	2A	T2N0M0	0	F	Ductal Adenocarcinoma	8500/3: Infiltrating duct carcinoma, NOS	2	3	Poorly differentiated		positive/positive	negative			22.0553	9.88308	12.1722
RebeccaRepeat	Br 2 LDA 9-28-09 Plate 1	F24	1070062A1	Invasive Carcinoma	HSP90AB1-Hs00607336_gH	3	CHTN	49	T2N0M0	2A	T2N0M0	0	F	Ductal Adenocarcinoma	8500/3: Infiltrating duct carcinoma, NOS	2	3	Poorly differentiated		positive/positive	negative			22.2491	9.88308	12.366
Jill	10-06-08 Samples 22-25Maricicass12-16	N19	1070512A1	Invasive Carcinoma	HSP90AB1-Hs00607336_gH	1	CHTN	80	T1cN0M0	1A	T1cN0M0	0		invasive ductal carcinoma	8500/3: Infiltrating duct carcinoma, NOS	1	2	Moderately differentiated		positive/positive	negative			24.502	6.83775	17.6642	17.6156
Jill	10-06-08 Samples 22-25Maricicass12-16	N20	1070512A1	Invasive Carcinoma	HSP90AB1-Hs00607336_gH	2	CHTN	80	T1cN0M0	1A	T1cN0M0	0		invasive ductal carcinoma	8500/3: Infiltrating duct carcinoma, NOS	1	2	Moderately differentiated		positive/positive	negative			24.4017	6.83775	17.564
Jill	10-06-08 Samples 22-25Maricicass12-16	N21	1070512A1	Invasive Carcinoma	HSP90AB1-Hs00607336_gH	3	CHTN	80	T1cN0M0	1A	T1cN0M0	0		invasive ductal carcinoma	8500/3: Infiltrating duct carcinoma, NOS	1	2	Moderately differentiated		positive/positive	negative			24.4562	6.83775	17.6185
2 RebeccaRepeat	Br 2 LDA 11-18-09 Plate 1	N23	1072014A5	Invasive Carcinoma	HSP90AB1-Hs00607336_gH	1	CHTN	49	T3N0M0	2B	T3N0M0	0	F	Invasive ductal carcinoma	8500/3: Infiltrating duct carcinoma, NOS	2	3	Poorly differentiated		positive/positive	positive			23.7745	5.80943	17.965	18.0811
2 RebeccaRepeat	Br 2 LDA 11-18-09 Plate 1	N24	1072014A5	Invasive Carcinoma	HSP90AB1-Hs00607336_gH	2	CHTN	49	T3N0M0	2B	T3N0M0	0	F	Invasive ductal carcinoma	8500/3: Infiltrating duct carcinoma, NOS	2	3	Poorly differentiated		positive/positive	positive			23.9413	5.80943	18.1319
2 RebeccaRepeat	Br 2 LDA 11-18-09 Plate 1	N22	1072014A5	Invasive Carcinoma	HSP90AB1-Hs00607336_gH	3	CHTN	49	T3N0M0	2B	T3N0M0	0	F	Invasive ductal carcinoma	8500/3: Infiltrating duct carcinoma, NOS	2	3	Poorly differentiated		positive/positive	positive			23.9559	5.80943	18.1464
RebeccaRepeat	Br 2 LDA 9-25-09 Plate 1	B23	1080312A4	Invasive Carcinoma	HSP90AB1-Hs00607336_gH	1	CHTN	71	T2N1M0	2B	T2N1M0	1	F	Invasive Ductal Carcinoma	8500/3: Infiltrating duct carcinoma, NOS	2	2	Moderately differentiated	Frozen& Paraffin	positive/positive	negative			24.2337	10.076	14.1577	14.2275
RebeccaRepeat	Br 2 LDA 9-25-09 Plate 1	B22	1080312A4	Invasive Carcinoma	HSP90AB1-Hs00607336_gH	2	CHTN	71	T2N1M0	2B	T2N1M0	1	F	Invasive Ductal Carcinoma	8500/3: Infiltrating duct carcinoma, NOS	2	2	Moderately differentiated	Frozen& Paraffin	positive/positive	negative			24.2768	10.076	14.2008
RebeccaRepeat	Br 2 LDA 9-25-09 Plate 1	B24	1080312A4	Invasive Carcinoma	HSP90AB1-Hs00607336_gH	3	CHTN	71	T2N1M0	2B	T2N1M0	1	F	Invasive Ductal Carcinoma	8500/3: Infiltrating duct carcinoma, NOS	2	2	Moderately differentiated	Frozen& Paraffin	positive/positive	negative			24.4	10.076	14.324
2 RebeccaRepeat	Br 2 LDA 10-26-09 Plate 2 mirVana	F23	1080502A1	Invasive Carcinoma	HSP90AB1-Hs00607336_gH	1	CHTN	42	T2N0M0	2A	T2N0M0	0	F	Invasive Ductal Carcinoma	8500/3: Infiltrating duct carcinoma, NOS	2	3	Poorly differentiated	Frozen& Paraffin	pending	pending			26.286	14.3589	11.9271	11.9966
2 RebeccaRepeat	Br 2 LDA 10-26-09 Plate 2 mirVana	F22	1080502A1	Invasive Carcinoma	HSP90AB1-Hs00607336_gH	2	CHTN	42	T2N0M0	2A	T2N0M0	0	F	Invasive Ductal Carcinoma	8500/3: Infiltrating duct carcinoma, NOS	2	3	Poorly differentiated	Frozen& Paraffin	pending	pending			26.2943	14.3589	11.9354
2 RebeccaRepeat	Br 2 LDA 10-26-09 Plate 2 mirVana	F24	1080502A1	Invasive Carcinoma	HSP90AB1-Hs00607336_gH	3	CHTN	42	T2N0M0	2A	T2N0M0	0	F	Invasive Ductal Carcinoma	8500/3: Infiltrating duct carcinoma, NOS	2	3	Poorly differentiated	Frozen& Paraffin	pending	pending			26.4862	14.3589	12.1273
2 RebeccaRepeat	Br 2 LDA 10-26-09 Plate 2 mirVana	B22	1080719B5	Invasive Carcinoma	HSP90AB1-Hs00607336_gH	1	CHTN	64	T3N0M0	2B	T3N0M0	0	F	Invasive Ductal Carcinoma	8500/3: Infiltrating duct carcinoma, NOS	2	3	Poorly Differentiated	Frozen & Paraffin	ordered	ordered			23.8108	16.0027	7.80809	7.89043
2 RebeccaRepeat	Br 2 LDA 10-26-09 Plate 2 mirVana	B23	1080719B5	Invasive Carcinoma	HSP90AB1-Hs00607336_gH	2	CHTN	64	T3N0M0	2B	T3N0M0	0	F	Invasive Ductal Carcinoma	8500/3: Infiltrating duct carcinoma, NOS	2	3	Poorly Differentiated	Frozen & Paraffin	ordered	ordered			23.9251	16.0027	7.92238
2 RebeccaRepeat	Br 2 LDA 10-26-09 Plate 2 mirVana	B24	1080719B5	Invasive Carcinoma	HSP90AB1-Hs00607336_gH	3	CHTN	64	T3N0M0	2B	T3N0M0	0	F	Invasive Ductal Carcinoma	8500/3: Infiltrating duct carcinoma, NOS	2	3	Poorly Differentiated	Frozen & Paraffin	ordered	ordered			23.9435	16.0027	7.94083
2 RebeccaRepeat	Br 2 LDA 10-26-09 Plate 2 mirVana	J24	1081454A6	Invasive Carcinoma	HSP90AB1-Hs00607336_gH	1	CHTN	51	T2N0M0	2A	T2N0M0	0	M	Invasive Ductal Carcinoma	8500/3: Infiltrating duct carcinoma, NOS	2	3	Poorly Differentiated	Frozen & Paraffin	positive / negative	negative			20.7776	13.9592	6.81838	6.91524
2 RebeccaRepeat	Br 2 LDA 10-26-09 Plate 2 mirVana	J22	1081454A6	Invasive Carcinoma	HSP90AB1-Hs00607336_gH	2	CHTN	51	T2N0M0	2A	T2N0M0	0	M	Invasive Ductal Carcinoma	8500/3: Infiltrating duct carcinoma, NOS	2	3	Poorly Differentiated	Frozen & Paraffin	positive / negative	negative			20.8964	13.9592	6.93718
2 RebeccaRepeat	Br 2 LDA 10-26-09 Plate 2 mirVana	J23	1081454A6	Invasive Carcinoma	HSP90AB1-Hs00607336_gH	3	CHTN	51	T2N0M0	2A	T2N0M0	0	M	Invasive Ductal Carcinoma	8500/3: Infiltrating duct carcinoma, NOS	2	3	Poorly Differentiated	Frozen & Paraffin	positive / negative	negative			20.9494	13.9592	6.99017
Jill	10-06-08 Samples 18-21s-09-12	F19	3061119A4	Invasive Carcinoma	HSP90AB1-Hs00607336_gH	1	CHTN	74	T2N0M0	2A	T2N0M0	0		infiltrating ductal carcinoma with mucinous differentiation	8523/3: Infiltrating duct mixed with other types of ca.	2	1	Well-differentiated						21.5489	8.0076	13.5413	13.5737
Jill	10-06-08 Samples 18-21s-09-12	F20	3061119A4	Invasive Carcinoma	HSP90AB1-Hs00607336_gH	2	CHTN	74	T2N0M0	2A	T2N0M0	0		infiltrating ductal carcinoma with mucinous differentiation	8523/3: Infiltrating duct mixed with other types of ca.	2	1	Well-differentiated						21.6136	8.0076	13.606
Jill	10-06-08 Samples 18-21s-09-12	F21	3061119A4	Invasive Carcinoma	HSP90AB1-Hs00607336_gH	3	CHTN	74	T2N0M0	2A	T2N0M0	0		infiltrating ductal carcinoma with mucinous differentiation	8523/3: Infiltrating duct mixed with other types of ca.	2	1	Well-differentiated							8.0076
2 RebeccaRepeat	Br 2 LDA 11-18-09 Plate 1	J22	3062104A7	Invasive Carcinoma	HSP90AB1-Hs00607336_gH	1	CHTN	52	T2, N0, M0	2A	T2, N0, M0	0	F	Invasive ductal carcinoma	8500/3: Infiltrating duct carcinoma, NOS	2	3	Poorly Differentiated						24.2459	5.27169	18.9742	19.0811
2 RebeccaRepeat	Br 2 LDA 11-18-09 Plate 1	J23	3062104A7	Invasive Carcinoma	HSP90AB1-Hs00607336_gH	2	CHTN	52	T2, N0, M0	2A	T2, N0, M0	0	F	Invasive ductal carcinoma	8500/3: Infiltrating duct carcinoma, NOS	2	3	Poorly Differentiated						24.3192	5.27169	19.0475
2 RebeccaRepeat	Br 2 LDA 11-18-09 Plate 1	J24	3062104A7	Invasive Carcinoma	HSP90AB1-Hs00607336_gH	3	CHTN	52	T2, N0, M0	2A	T2, N0, M0	0	F	Invasive ductal carcinoma	8500/3: Infiltrating duct carcinoma, NOS	2	3	Poorly Differentiated						24.4932	5.27169	19.2215
Jill	10-06-08 Samples 13-16-s-08-09	J19	3070617A7	Invasive Carcinoma	HSP90AB1-Hs00607336_gH	1	CHTN	83	T3N0M0	2B	T3N0M0	0		infiltrating ductal carcinoma	8500/3: Infiltrating duct carcinoma, NOS	2	2	Moderately differentiated		positive/positive				22.9625	10.0795	12.8829	13.0326
Jill	10-06-08 Samples 13-16-s-08-09	J20	3070617A7	Invasive Carcinoma	HSP90AB1-Hs00607336_gH	2	CHTN	83	T3N0M0	2B	T3N0M0	0		infiltrating ductal carcinoma	8500/3: Infiltrating duct carcinoma, NOS	2	2	Moderately differentiated		positive/positive				23.0909	10.0795	13.0114
Jill	10-06-08 Samples 13-16-s-08-09	J21	3070617A7	Invasive Carcinoma	HSP90AB1-Hs00607336_gH	3	CHTN	83	T3N0M0	2B	T3N0M0	0		infiltrating ductal carcinoma	8500/3: Infiltrating duct carcinoma, NOS	2	2	Moderately differentiated		positive/positive				23.2831	10.0795	13.2035
Jill	10-06-08 Samples 22-25Maricicass12-16	F19	4060634A10	Invasive Carcinoma	HSP90AB1-Hs00607336_gH	1	CHTN	79	T2N0M0	2A	T2N0M0	0		infiltrating ductal carcinoma with foci of cartilagginous metaplasia (metaplastic carcinoma)	8523/3: Infiltrating duct mixed with other types of ca.	2	3	Poorly differentiated						24.4906	8.78822	15.7024	15.5235
Jill	10-06-08 Samples 22-25Maricicass12-16	F20	4060634A10	Invasive Carcinoma	HSP90AB1-Hs00607336_gH	2	CHTN	79	T2N0M0	2A	T2N0M0	0		infiltrating ductal carcinoma with foci of cartilagginous metaplasia (metaplastic carcinoma)	8523/3: Infiltrating duct mixed with other types of ca.	2	3	Poorly differentiated						24.0257	8.78822	15.2375
Jill	10-06-08 Samples 22-25Maricicass12-16	F21	4060634A10	Invasive Carcinoma	HSP90AB1-Hs00607336_gH	3	CHTN	79	T2N0M0	2A	T2N0M0	0		infiltrating ductal carcinoma with foci of cartilagginous metaplasia (metaplastic carcinoma)	8523/3: Infiltrating duct mixed with other types of ca.	2	3	Poorly differentiated						24.4187	8.78822	15.6305
Jill	10-02-08 Samples 9-12	J19	4061094B24	Invasive Carcinoma	HSP90AB1-Hs00607336_gH	1	CHTN	84	T3N1M0	3C	T3N1M0	1		infiltrating ductal carcinoma	8500/3: Infiltrating duct carcinoma, NOS	3	3	Poorly differentiated						23.275	11.0615	12.2136	12.3971
Jill	10-02-08 Samples 9-12	J20	4061094B24	Invasive Carcinoma	HSP90AB1-Hs00607336_gH	2	CHTN	84	T3N1M0	3C	T3N1M0	1		infiltrating ductal carcinoma	8500/3: Infiltrating duct carcinoma, NOS	3	3	Poorly differentiated						23.6179	11.0615	12.5564
Jill	10-02-08 Samples 9-12	J21	4061094B24	Invasive Carcinoma	HSP90AB1-Hs00607336_gH	3	CHTN	84	T3N1M0	3C	T3N1M0	1		infiltrating ductal carcinoma	8500/3: Infiltrating duct carcinoma, NOS	3	3	Poorly differentiated						23.4827	11.0615	12.4212
Jill	10-02-08 Samples 9-12	N19	4061196A1	Invasive Carcinoma	HSP90AB1-Hs00607336_gH	1	CHTN	75	T2N0M0	2A	T2N0M0	0		infiltrating lobular carcinoma with pleomorphic features and infiltrating ductal carcinoma (small component)	8524/3: Infiltrating lobular mixed with other types of ca.	2	2	Moderately differentiated						22.4009	7.20059	15.2003	15.0811
Jill	10-02-08 Samples 9-12	N20	4061196A1	Invasive Carcinoma	HSP90AB1-Hs00607336_gH	2	CHTN	75	T2N0M0	2A	T2N0M0	0		infiltrating lobular carcinoma with pleomorphic features and infiltrating ductal carcinoma (small component)	8524/3: Infiltrating lobular mixed with other types of ca.	2	2	Moderately differentiated						22.2482	7.20059	15.0476
Jill	10-02-08 Samples 9-12	N21	4061196A1	Invasive Carcinoma	HSP90AB1-Hs00607336_gH	3	CHTN	75	T2N0M0	2A	T2N0M0	0		infiltrating lobular carcinoma with pleomorphic features and infiltrating ductal carcinoma (small component)	8524/3: Infiltrating lobular mixed with other types of ca.	2	2	Moderately differentiated						22.1961	7.20059	14.9955
Jill	10-06-08 Samples 13-16-s-08-09	N19	4070249A3	Invasive Carcinoma	HSP90AB1-Hs00607336_gH	1	CHTN	61	T2N0M0	2A	T2N0M0	0		invasive lobular carcinoma, pleomorphic type with signet-ring cell features	8524/3: Infiltrating lobular mixed with other types of ca.	2	1	Well-differentiated						24.7036	11.885	12.8186	12.8402
Jill	10-06-08 Samples 13-16-s-08-09	N20	4070249A3	Invasive Carcinoma	HSP90AB1-Hs00607336_gH	2	CHTN	61	T2N0M0	2A	T2N0M0	0		invasive lobular carcinoma, pleomorphic type with signet-ring cell features	8524/3: Infiltrating lobular mixed with other types of ca.	2	1	Well-differentiated						24.9872	11.885	13.1022
Jill	10-06-08 Samples 13-16-s-08-09	N21	4070249A3	Invasive Carcinoma	HSP90AB1-Hs00607336_gH	3	CHTN	61	T2N0M0	2A	T2N0M0	0		invasive lobular carcinoma, pleomorphic type with signet-ring cell features	8524/3: Infiltrating lobular mixed with other types of ca.	2	1	Well-differentiated						24.4846	11.885	12.5997
RebeccaRepeat	Br 2 LDA 9-28-09 Plate 1	J24	4080633A6	Invasive Carcinoma	HSP90AB1-Hs00607336_gH	1	CHTN	65	T3, N1, M0	3A	T3, N1, M0	1	F	Invasive Ductal Carcinoma	8500/3: Infiltrating duct carcinoma, NOS	3	3	Poorly Differentiated	Frozen& Paraffin					23.5086	10.7268	12.7818	13.0078
RebeccaRepeat	Br 2 LDA 9-28-09 Plate 1	J23	4080633A6	Invasive Carcinoma	HSP90AB1-Hs00607336_gH	2	CHTN	65	T3, N1, M0	3A	T3, N1, M0	1	F	Invasive Ductal Carcinoma	8500/3: Infiltrating duct carcinoma, NOS	3	3	Poorly Differentiated	Frozen& Paraffin					23.8297	10.7268	13.1029
RebeccaRepeat	Br 2 LDA 9-28-09 Plate 1	J22	4080633A6	Invasive Carcinoma	HSP90AB1-Hs00607336_gH	3	CHTN	65	T3, N1, M0	3A	T3, N1, M0	1	F	Invasive Ductal Carcinoma	8500/3: Infiltrating duct carcinoma, NOS	3	3	Poorly Differentiated	Frozen& Paraffin					23.8656	10.7268	13.1388
RebeccaLast	Br 2 LDA 1-7-10 Plate 1	J22	T03-104	Invasive Carcinoma	HSP90AB1-Hs00607336_gH	1	WVUTB	Missing	T3N1M0	3A	T3N1M0	1	F	Infiltrating Ductal Carcinoma	8500/3: Infiltrating duct carcinoma, NOS	3	3	Poorly differentiated	Frozen	negative/negative	negative			22.0936	14.5378	7.55582	7.54848
RebeccaLast	Br 2 LDA 1-7-10 Plate 1	J23	T03-104	Invasive Carcinoma	HSP90AB1-Hs00607336_gH	2	WVUTB	Missing	T3N1M0	3A	T3N1M0	1	F	Infiltrating Ductal Carcinoma	8500/3: Infiltrating duct carcinoma, NOS	3	3	Poorly differentiated	Frozen	negative/negative	negative			22.0598	14.5378	7.52208
RebeccaLast	Br 2 LDA 1-7-10 Plate 1	J24	T03-104	Invasive Carcinoma	HSP90AB1-Hs00607336_gH	3	WVUTB	Missing	T3N1M0	3A	T3N1M0	1	F	Infiltrating Ductal Carcinoma	8500/3: Infiltrating duct carcinoma, NOS	3	3	Poorly differentiated	Frozen	negative/negative	negative			22.1053	14.5378	7.56755
Jill	10-09-08 Samples 50-53s40-44	B19	T033474	Invasive Carcinoma	HSP90AB1-Hs00607336_gH	1	WVUTB	50	I;T1,NO,MO		T1,NO,MO	0		infiltrating ductal carcinoma	8500/3: Infiltrating duct carcinoma, NOS	1	2	Moderately Differentiated						25.7382	8.56206	17.1761	17.245
Jill	10-09-08 Samples 50-53s40-44	B20	T033474	Invasive Carcinoma	HSP90AB1-Hs00607336_gH	2	WVUTB	50	I;T1,NO,MO		T1,NO,MO	0		infiltrating ductal carcinoma	8500/3: Infiltrating duct carcinoma, NOS	1	2	Moderately Differentiated						25.7776	8.56206	17.2155
Jill	10-09-08 Samples 50-53s40-44	B21	T033474	Invasive Carcinoma	HSP90AB1-Hs00607336_gH	3	WVUTB	50	I;T1,NO,MO		T1,NO,MO	0		infiltrating ductal carcinoma	8500/3: Infiltrating duct carcinoma, NOS	1	2	Moderately Differentiated						25.9054	8.56206	17.3433
Jill	10-09-08 Samples 50-53s40-44	J19	T041014	Invasive Carcinoma	HSP90AB1-Hs00607336_gH	1	WVUTB	66	IIA,T2, N0, M0		T2, N0, M0	0		invasive ductal carcinoma	8500/3: Infiltrating duct carcinoma, NOS	2	3	Poorly differentiated						22.2005	5.78564	16.4149	16.3721
Jill	10-09-08 Samples 50-53s40-44	J20	T041014	Invasive Carcinoma	HSP90AB1-Hs00607336_gH	2	WVUTB	66	IIA,T2, N0, M0		T2, N0, M0	0		invasive ductal carcinoma	8500/3: Infiltrating duct carcinoma, NOS	2	3	Poorly differentiated						22.2413	5.78564	16.4556
Jill	10-09-08 Samples 50-53s40-44	J21	T041014	Invasive Carcinoma	HSP90AB1-Hs00607336_gH	3	WVUTB	66	IIA,T2, N0, M0		T2, N0, M0	0		invasive ductal carcinoma	8500/3: Infiltrating duct carcinoma, NOS	2	3	Poorly differentiated						22.0315	5.78564	16.2458
2 RebeccaRepeat	Br 2 LDA 11-16-09 Plate 1	N24	T04-167-005	Invasive Carcinoma	HSP90AB1-Hs00607336_gH	1	WVUTB	43	T2, N0, M0	2A	T2, N0, M0	0	F	Infiltrating metastatic ductal carcinoma	8500/3: Infiltrating duct carcinoma, NOS	2	3	Poorly differentiated	Frozen	positive/positive	intermediate	Pre menopausal		26.1286	10.7992	15.3294	15.4409
2 RebeccaRepeat	Br 2 LDA 11-16-09 Plate 1	N23	T04-167-005	Invasive Carcinoma	HSP90AB1-Hs00607336_gH	2	WVUTB	43	T2, N0, M0	2A	T2, N0, M0	0	F	Infiltrating metastatic ductal carcinoma	8500/3: Infiltrating duct carcinoma, NOS	2	3	Poorly differentiated	Frozen	positive/positive	intermediate	Pre menopausal		26.1478	10.7992	15.3486
2 RebeccaRepeat	Br 2 LDA 11-16-09 Plate 1	N22	T04-167-005	Invasive Carcinoma	HSP90AB1-Hs00607336_gH	3	WVUTB	43	T2, N0, M0	2A	T2, N0, M0	0	F	Infiltrating metastatic ductal carcinoma	8500/3: Infiltrating duct carcinoma, NOS	2	3	Poorly differentiated	Frozen	positive/positive	intermediate	Pre menopausal		26.444	10.7992	15.6448
Jill	10-09-08 Samples 46-49s37-40	J19	T053774	Invasive Carcinoma	HSP90AB1-Hs00607336_gH	1	WVUTB	59	IIA;T2,N0,M0		T2,N0,M0	0		infiltrating ductal carcinoma	8500/3: Infiltrating duct carcinoma, NOS	2	3	Poorly differentiated						20.1935	5.64001	14.5535	14.671
Jill	10-09-08 Samples 46-49s37-40	J20	T053774	Invasive Carcinoma	HSP90AB1-Hs00607336_gH	2	WVUTB	59	IIA;T2,N0,M0		T2,N0,M0	0		infiltrating ductal carcinoma	8500/3: Infiltrating duct carcinoma, NOS	2	3	Poorly differentiated						20.357	5.64001	14.7169
Jill	10-09-08 Samples 46-49s37-40	J21	T053774	Invasive Carcinoma	HSP90AB1-Hs00607336_gH	3	WVUTB	59	IIA;T2,N0,M0		T2,N0,M0	0		infiltrating ductal carcinoma	8500/3: Infiltrating duct carcinoma, NOS	2	3	Poorly differentiated						20.3825	5.64001	14.7425
Jill	10-07-08 Samples 34-37-Maricicas-27-28	B19	T053889	Invasive Carcinoma	HSP90AB1-Hs00607336_gH	1	WVUTB	80	IIA, pT2, pN0, pM0		pT2, pN0, pM0	0		infiltrating ductal adenocarcinoma	8500/3: Infiltrating duct carcinoma, NOS	2	3	Poorly differentiated						22.7805	7.30877	15.4717	15.3357
Jill	10-07-08 Samples 34-37-Maricicas-27-28	B20	T053889	Invasive Carcinoma	HSP90AB1-Hs00607336_gH	2	WVUTB	80	IIA, pT2, pN0, pM0		pT2, pN0, pM0	0		infiltrating ductal adenocarcinoma	8500/3: Infiltrating duct carcinoma, NOS	2	3	Poorly differentiated						22.5207	7.30877	15.212
Jill	10-07-08 Samples 34-37-Maricicas-27-28	B21	T053889	Invasive Carcinoma	HSP90AB1-Hs00607336_gH	3	WVUTB	80	IIA, pT2, pN0, pM0		pT2, pN0, pM0	0		infiltrating ductal adenocarcinoma	8500/3: Infiltrating duct carcinoma, NOS	2	3	Poorly differentiated						22.6321	7.30877	15.3234
Jill	10-08-08 Samples 38-41s31-32	N19	T0607908	Invasive Carcinoma	HSP90AB1-Hs00607336_gH	1	WVUTB	46	IIA, pT2N0M0		pT2N0M0	0		papillary carcinoma	8050/3: Papillary carcinoma, NOS	2	2	Moderately differentiated						22.1927	6.56973	15.6229	15.5616
Jill	10-08-08 Samples 38-41s31-32	N20	T0607908	Invasive Carcinoma	HSP90AB1-Hs00607336_gH	2	WVUTB	46	IIA, pT2N0M0		pT2N0M0	0		papillary carcinoma	8050/3: Papillary carcinoma, NOS	2	2	Moderately differentiated						22.1065	6.56973	15.5368
Jill	10-08-08 Samples 38-41s31-32	N21	T0607908	Invasive Carcinoma	HSP90AB1-Hs00607336_gH	3	WVUTB	46	IIA, pT2N0M0		pT2N0M0	0		papillary carcinoma	8050/3: Papillary carcinoma, NOS	2	2	Moderately differentiated						22.0947	6.56973	15.525
Jill	10-08-08 Samples 42-45s32-36	J19	T061324	Invasive Carcinoma	HSP90AB1-Hs00607336_gH	1	WVUTB	55	II, pT2, pN0, pM0		pT2, pN0, pM0	0		invasive ductal adenocarcinoma, mucinous	8500/3: Infiltrating duct carcinoma, NOS	2	3	Poorly Differentiated						20.3809	6.26543	14.1154	14.2651
Jill	10-08-08 Samples 42-45s32-36	J20	T061324	Invasive Carcinoma	HSP90AB1-Hs00607336_gH	2	WVUTB	55	II, pT2, pN0, pM0		pT2, pN0, pM0	0		invasive ductal adenocarcinoma, mucinous	8500/3: Infiltrating duct carcinoma, NOS	2	3	Poorly Differentiated						20.6299	6.26543	14.3645
Jill	10-08-08 Samples 42-45s32-36	J21	T061324	Invasive Carcinoma	HSP90AB1-Hs00607336_gH	3	WVUTB	55	II, pT2, pN0, pM0		pT2, pN0, pM0	0		invasive ductal adenocarcinoma, mucinous	8500/3: Infiltrating duct carcinoma, NOS	2	3	Poorly Differentiated						20.5807	6.26543	14.3153
Jill	10-07-08 Samples 34-37-Maricicas-27-28	J19	T0621513	Invasive Carcinoma	HSP90AB1-Hs00607336_gH	1	WVUTB	86	IIIB, T4, N1, M0		T4, N1, M0	1		mammary carcinoma, predominately mucinous adenocarcinoma with areas of infiltrating ductal carcinoma	8480/3: Mucinous adenocarcinoma	3	3	Poorly differentiated						23.2368	7.7534	15.4834	15.5961
Jill	10-07-08 Samples 34-37-Maricicas-27-28	J20	T0621513	Invasive Carcinoma	HSP90AB1-Hs00607336_gH	2	WVUTB	86	IIIB, T4, N1, M0		T4, N1, M0	1		mammary carcinoma, predominately mucinous adenocarcinoma with areas of infiltrating ductal carcinoma	8480/3: Mucinous adenocarcinoma	3	3	Poorly differentiated							7.7534
Jill	10-07-08 Samples 34-37-Maricicas-27-28	J21	T0621513	Invasive Carcinoma	HSP90AB1-Hs00607336_gH	3	WVUTB	86	IIIB, T4, N1, M0		T4, N1, M0	1		mammary carcinoma, predominately mucinous adenocarcinoma with areas of infiltrating ductal carcinoma	8480/3: Mucinous adenocarcinoma	3	3	Poorly differentiated						23.4623	7.7534	15.7089
Jill	10-07-08 Samples 34-37-Maricicas-27-28	N19	T0630919	Invasive Carcinoma	HSP90AB1-Hs00607336_gH	1	WVUTB	58	I, pT1,pN0, pM0		pT1,pN0, pM0	0		invasive ductal carcinoma, mucinous carcinoma	8500/3: Infiltrating duct carcinoma, NOS	1	1	Well-differentiated						22.9427	8.44754	14.4951	14.5126
Jill	10-07-08 Samples 34-37-Maricicas-27-28	N20	T0630919	Invasive Carcinoma	HSP90AB1-Hs00607336_gH	2	WVUTB	58	I, pT1,pN0, pM0		pT1,pN0, pM0	0		invasive ductal carcinoma, mucinous carcinoma	8500/3: Infiltrating duct carcinoma, NOS	1	1	Well-differentiated						22.9699	8.44754	14.5223
Jill	10-07-08 Samples 34-37-Maricicas-27-28	N21	T0630919	Invasive Carcinoma	HSP90AB1-Hs00607336_gH	3	WVUTB	58	I, pT1,pN0, pM0		pT1,pN0, pM0	0		invasive ductal carcinoma, mucinous carcinoma	8500/3: Infiltrating duct carcinoma, NOS	1	1	Well-differentiated						22.968	8.44754	14.5205
RebeccaRepeat	Br 2 LDA 9-28-09 Plate 2	J23	T06-326-013	Invasive Carcinoma	HSP90AB1-Hs00607336_gH	1	WVUTB	44	pT2, pN2a, pMx	3A	pT2, pN2a, pMx	1	F	Invasive ductal carcinoma	8500/3: Infiltrating duct carcinoma, NOS	3	3	Poorly differentiated	Frozen	Positive / Positive	negative			22.3051	9.01661	13.2885	13.343
RebeccaRepeat	Br 2 LDA 9-28-09 Plate 2	J24	T06-326-013	Invasive Carcinoma	HSP90AB1-Hs00607336_gH	2	WVUTB	44	pT2, pN2a, pMx	3A	pT2, pN2a, pMx	1	F	Invasive ductal carcinoma	8500/3: Infiltrating duct carcinoma, NOS	3	3	Poorly differentiated	Frozen	Positive / Positive	negative			22.374	9.01661	13.3573
RebeccaRepeat	Br 2 LDA 9-28-09 Plate 2	J22	T06-326-013	Invasive Carcinoma	HSP90AB1-Hs00607336_gH	3	WVUTB	44	pT2, pN2a, pMx	3A	pT2, pN2a, pMx	1	F	Invasive ductal carcinoma	8500/3: Infiltrating duct carcinoma, NOS	3	3	Poorly differentiated	Frozen	Positive / Positive	negative			22.3998	9.01661	13.3832
Jill	10-08-08 Samples 38-41s31-32	B19	T0633206	Invasive Carcinoma	HSP90AB1-Hs00607336_gH	1	WVUTB	50	IIA, pT2, pN0, pM0		pT2, pN0, pM0	0		invasive ductal carcinoma	8500/3: Infiltrating duct carcinoma, NOS	2	1	Well-differentiated						23.6246	8.27849	15.3461	15.8268
Jill	10-08-08 Samples 38-41s31-32	B20	T0633206	Invasive Carcinoma	HSP90AB1-Hs00607336_gH	2	WVUTB	50	IIA, pT2, pN0, pM0		pT2, pN0, pM0	0		invasive ductal carcinoma	8500/3: Infiltrating duct carcinoma, NOS	2	1	Well-differentiated						23.9492	8.27849	15.6707
Jill	10-08-08 Samples 38-41s31-32	B21	T0633206	Invasive Carcinoma	HSP90AB1-Hs00607336_gH	3	WVUTB	50	IIA, pT2, pN0, pM0		pT2, pN0, pM0	0		invasive ductal carcinoma	8500/3: Infiltrating duct carcinoma, NOS	2	1	Well-differentiated						24.742	8.27849	16.4635
Jill	10-08-08 Samples 42-45s32-36	B19	T0633418	Invasive Carcinoma	HSP90AB1-Hs00607336_gH	1	WVUTB	50	IIIC, pT1, pN3a, pM0		pT1, pN3a, pM0	1		infiltrating ductal adenocarcinoma	8500/3: Infiltrating duct carcinoma, NOS	3	3	Poorly Differentiated						19.7752	4.40614	15.369	15.2872
Jill	10-08-08 Samples 42-45s32-36	B20	T0633418	Invasive Carcinoma	HSP90AB1-Hs00607336_gH	2	WVUTB	50	IIIC, pT1, pN3a, pM0		pT1, pN3a, pM0	1		infiltrating ductal adenocarcinoma	8500/3: Infiltrating duct carcinoma, NOS	3	3	Poorly Differentiated						19.4132	4.40614	15.007
Jill	10-08-08 Samples 42-45s32-36	B21	T0633418	Invasive Carcinoma	HSP90AB1-Hs00607336_gH	3	WVUTB	50	IIIC, pT1, pN3a, pM0		pT1, pN3a, pM0	1		infiltrating ductal adenocarcinoma	8500/3: Infiltrating duct carcinoma, NOS	3	3	Poorly Differentiated						19.8917	4.40614	15.4855
Jill	10-07-08 Samples 26-29s-17-20	B19	T066004	Invasive Carcinoma	HSP90AB1-Hs00607336_gH	1	WVUTB	46	IIA, T2, N1, M0		T2, N1, M0	1		infiltrating ductal carcinoma	8500/3: Infiltrating duct carcinoma, NOS	2	3	Poorly differentiated						25.7154	8.53468	17.1807	17.2251
Jill	10-07-08 Samples 26-29s-17-20	B20	T066004	Invasive Carcinoma	HSP90AB1-Hs00607336_gH	2	WVUTB	46	IIA, T2, N1, M0		T2, N1, M0	1		infiltrating ductal carcinoma	8500/3: Infiltrating duct carcinoma, NOS	2	3	Poorly differentiated						25.6492	8.53468	17.1145
Jill	10-07-08 Samples 26-29s-17-20	B21	T066004	Invasive Carcinoma	HSP90AB1-Hs00607336_gH	3	WVUTB	46	IIA, T2, N1, M0		T2, N1, M0	1		infiltrating ductal carcinoma	8500/3: Infiltrating duct carcinoma, NOS	2	3	Poorly differentiated						25.9147	8.53468	17.38
Jill	10-07-08 Samples 30-33s-21-24	J19	T069213	Invasive Carcinoma	HSP90AB1-Hs00607336_gH	1	WVUTB	80	1, T1, N0, M0		T1, N0, M0	0		invasive pleomorphic lobular carcinoma	8524/3: Infiltrating lobular mixed with other types of ca.	1	3	Poorly differentiated						23.7851	7.49955	16.2855	16.3563
Jill	10-07-08 Samples 30-33s-21-24	J20	T069213	Invasive Carcinoma	HSP90AB1-Hs00607336_gH	2	WVUTB	80	1, T1, N0, M0		T1, N0, M0	0		invasive pleomorphic lobular carcinoma	8524/3: Infiltrating lobular mixed with other types of ca.	1	3	Poorly differentiated						23.8093	7.49955	16.3097
Jill	10-07-08 Samples 30-33s-21-24	J21	T069213	Invasive Carcinoma	HSP90AB1-Hs00607336_gH	3	WVUTB	80	1, T1, N0, M0		T1, N0, M0	0		invasive pleomorphic lobular carcinoma	8524/3: Infiltrating lobular mixed with other types of ca.	1	3	Poorly differentiated						23.9732	7.49955	16.4737
2 RebeccaRepeat	Br 2 LDA 11-10-09 Plate 1	B22	T07-086-004	Invasive Carcinoma	HSP90AB1-Hs00607336_gH	1	WVUTB	45	pT1c, pN0(i-), pM0	1	pT1c, pN0(i-), pM0	0	F	Invasive ductal carcinoma	8500/3: Infiltrating duct carcinoma, NOS	1	3	Poorly differentiated	Frozen	positive / positive	negative			34.8468	28.6578	6.18894	7.20384
2 RebeccaRepeat	Br 2 LDA 11-10-09 Plate 1	B23	T07-086-004	Invasive Carcinoma	HSP90AB1-Hs00607336_gH	2	WVUTB	45	pT1c, pN0(i-), pM0	1	pT1c, pN0(i-), pM0	0	F	Invasive ductal carcinoma	8500/3: Infiltrating duct carcinoma, NOS	1	3	Poorly differentiated	Frozen	positive / positive	negative			35.7214	28.6578	7.06358
2 RebeccaRepeat	Br 2 LDA 11-10-09 Plate 1	B24	T07-086-004	Invasive Carcinoma	HSP90AB1-Hs00607336_gH	3	WVUTB	45	pT1c, pN0(i-), pM0	1	pT1c, pN0(i-), pM0	0	F	Invasive ductal carcinoma	8500/3: Infiltrating duct carcinoma, NOS	1	3	Poorly differentiated	Frozen	positive / positive	negative			37.0168	28.6578	8.359
Jill	10-09-08 Samples 46-49s37-40	B19	T0714312	Invasive Carcinoma	HSP90AB1-Hs00607336_gH	1	WVUTB	42	IIA;T2,N0,M0		T2,N0,M0	0		recurrent/residual infiltrating ductal adenocarcinoma with an extensive intraductal component	8500/3: Infiltrating duct carcinoma, NOS	2	3	Poorly differentiated						22.1001	6.7503	15.3498	15.4455
Jill	10-09-08 Samples 46-49s37-40	B20	T0714312	Invasive Carcinoma	HSP90AB1-Hs00607336_gH	2	WVUTB	42	IIA;T2,N0,M0		T2,N0,M0	0		recurrent/residual infiltrating ductal adenocarcinoma with an extensive intraductal component	8500/3: Infiltrating duct carcinoma, NOS	2	3	Poorly differentiated						22.1973	6.7503	15.447
Jill	10-09-08 Samples 46-49s37-40	B21	T0714312	Invasive Carcinoma	HSP90AB1-Hs00607336_gH	3	WVUTB	42	IIA;T2,N0,M0		T2,N0,M0	0		recurrent/residual infiltrating ductal adenocarcinoma with an extensive intraductal component	8500/3: Infiltrating duct carcinoma, NOS	2	3	Poorly differentiated						22.2901	6.7503	15.5398
Jill	10-09-08 Samples 46-49s37-40	N19	T071626	Invasive Carcinoma	HSP90AB1-Hs00607336_gH	1	WVUTB	69	IV, pT3, pN1a, pM0		pT3, pN1a, pM0	1		invasive ductal carcinoma	8500/3: Infiltrating duct carcinoma, NOS	3	3	Poorly differentiated						20.8901	6.71873	14.1713	14.1997
Jill	10-09-08 Samples 46-49s37-40	N20	T071626	Invasive Carcinoma	HSP90AB1-Hs00607336_gH	2	WVUTB	69	IV, pT3, pN1a, pM0		pT3, pN1a, pM0	1		invasive ductal carcinoma	8500/3: Infiltrating duct carcinoma, NOS	3	3	Poorly differentiated						20.911	6.71873	14.1923
Jill	10-09-08 Samples 46-49s37-40	N21	T071626	Invasive Carcinoma	HSP90AB1-Hs00607336_gH	3	WVUTB	69	IV, pT3, pN1a, pM0		pT3, pN1a, pM0	1		invasive ductal carcinoma	8500/3: Infiltrating duct carcinoma, NOS	3	3	Poorly differentiated						20.9542	6.71873	14.2355
[truncated: 5,646 more rows]

## Sheet: SummaryTumorType18SbySample
Detector	DCIS-FCvsNormal	IC-FCvsNormal	S-FCvsNormal		DCIS-ttest	IC-ttest	S-ttest
18S-Hs99999901_s1	1	1	1		0.830125	0.618389	0.297546
ACOT4-Hs00745041_s1	1.57632	5.2195	0.19352		0.524987	0.00149467	0.300374
[truncated: 30 more rows]

## Sheet: GraphTumorType18SbySample
Detector	ACOT4	DDOST	FAT	FGF2	HSP90AB1	IGHA1	INPPL1	INSM1	IRF5	MAP2K2	MCF2	MCM2	PBX2	PDGFRA	PSMC3IP	PLSCR1	RAD50	RAD52	RPUSD2	S100P	SEH1L	SLC25A5	SMARCD2	SSBP1	TOMM70A	TXNRD1
[truncated: 3 more rows]
