# Supplementary material for: Expression-Based Diagnosis, Treatment Selection, and Drug Development for Breast Cancer
Source: Int J Mol Sci. 2023 Jun 23;24(13):10561. doi: 10.3390/ijms241310561 (PMC10342177; doi:10.3390/ijms241310561)
Supplement: Supplementary file 1 [file ijms-24-10561-s001.zip › Supplementary FIle S3.xlsx]

## Sheet: TCGA Model Details
The multivariate Cox model built with 25 available genes:
risk-score = – 0.2999 × ACOT4 + 0.447 × DDOST – 0.1125 × FAT1 + 0.1337 × FGF2 + 0.2427 × HSP90AB1 + 0.1855 × INPPL1 – 0.0604 × INSM1 – 0.1095 × IRF5 + -0.4372 × MAP2K2 – 0.2069 × MCF2 – 0.0075 × MCM2 – 0.0029 × PBX2 – 0.0401 × PDGFRA + 0.1154 × PSMC3IP – 0.1727 × PLSCR1 + 0.1204 × RAD50 + 0.0743 × RAD52 + 0.5238 × RPUSD2 – 0.0546 × S100P – 0.6772 × SEH1L + 0.6057 × SLC25A5 – 0.0304 × SMARCD2 – 0.…

## Sheet: TCGA BRCA taining data
attrib_name	PAM50	ACOT4	DDOST	FAT1	FGF2	HSP90AB1	INPPL1	INSM1	IRF5	MAP2K2	MCF2	MCM2	PBX2	PDGFRA	PSMC3IP	PLSCR1	RAD50	RAD52	RPUSD2	S100P	SEH1L	SLC25A5	SMARCD2	SSBP1	TOMM70A	TXNRD1	overall_survival	status
TCGA.AC.A2FM	LumA	8.4965	11.4616	9.2903	5.7825	15.2559	11.0423	1.5872	8.0276	11.5432	0.4159	10.3701	9.6752	8.3419	7.8999	8.2733	10.6648	8.1463	7.8819	9.9706	9.0514	12.0516	11.5346	9.4594	11.2293	10.5069	792	1
TCGA.AN.A0AJ	LumB	6.974	11.6436	9.4827	6.0807	16.0902	11.6654	4.4353	7.8994	11.0164	1.1351	11.579	10.6982	9.4429	7.9946	9.8066	10.5327	7.1514	7.8022	6.1972	11.0108	13.0332	11.164	10.062	11.9695	11.9967	303	0
TCGA.A2.A0EY	LumB	7.2628	12.2345	10.0088	6.1009	14.7325	11.8375	1.0688	7.2103	11.485	1.0688	10.4616	10.1016	10.0385	6.949	8.559	10.213	7.0443	7.2799	9.8073	8.9786	12.5712	11.3104	9.9342	11.917	11.4109	1925	0
TCGA.BH.A0H3	LumA	7.5106	12.1331	12.9434	7.5692	14.6218	10.6551	0.4035	7.1951	9.9944	0	9.0557	10.4872	11.2853	5.9155	9.2386	11.4184	7.5233	7.4046	1.1958	9.8646	11.697	11.5417	10.0003	11.1585	10.7855	1928	0
TCGA.AC.A8OS	NA	8.075	11.8987	10.9797	11.3871	13.8551	11.655	0.9092	8.1857	10.8239	0.5251	8.9393	10.5223	10.7364	5.3996	8.8934	10.3959	7.428	7.3755	7.9803	8.6534	11.9383	10.3713	9.85	10.8777	10.4211	70	0
TCGA.EW.A3U0	Basal	5.1092	12.1116	10.6215	7.5324	15.3501	10.9805	6.2423	8.8747	11.1102	0.4893	11.625	10.4305	10.5101	6.777	10.3793	10.0632	6.8937	7.3904	7.6415	10.3363	12.7772	11.059	9.9268	10.5033	10.9472	532	0
TCGA.EW.A2FW	LumB	9.0259	11.3367	9.7802	4.7652	15.1533	11.1799	4.0558	6.7672	10.8063	0	11.5539	10.2963	8.6735	8.4218	8.0491	10.2838	7.1081	7.4769	12.1112	10.0567	12.3943	12.007	10.433	11.5938	10.2975	672	0
TCGA.A2.A0D4	LumB	7.6791	12.1801	9.4109	5.5128	16.2124	10.7849	6.1876	7.9106	10.2354	2.0687	11.3527	10.1259	8.43	8.2198	9.0651	10.1799	5.9285	6.7193	12.1088	9.192	12.5695	12.2737	9.8985	11.5284	12.1291	767	0
TCGA.BH.A0C0	LumB	7.8157	12.1232	9.3964	5.4003	14.9188	10.7987	4.1985	8.8601	11.549	2.0696	10.4129	9.808	9.2903	7.3055	10.575	9.7232	6.4053	7.7951	8.0174	9.5129	13.1525	12.0687	9.8464	10.6819	11.3916	1270	0
TCGA.A7.A3RF	LumA	7.8429	12.845	9.8773	4.208	16.0257	11.6366	2.6876	7.8386	11.4948	3.7997	9.2452	10.1551	8.0113	6.1186	8.2419	10.5745	6.3688	7.7156	7.7479	9.7875	12.257	11.8898	9.7146	11.4529	9.8616	408	0
TCGA.B6.A40B	NA	8.8619	11.8691	9.6146	5.164	15.0038	12.008	1.5458	7.6826	11.5062	0	10.1641	10.6333	8.7016	6.9664	8.5655	10.2737	7.287	8.0841	11.5149	9.6228	12.8104	11.4308	10.2915	10.4974	10.3956	3152	0
TCGA.AC.A23G	LumA	7.6395	12.2184	12.1598	8.9344	14.197	11.134	7.9075	8.1775	11.3737	0	9.5429	9.986	11.5883	4.9155	9.202	10.2167	6.4629	7.7013	5.9037	9.54	12.0756	11.1129	9.7867	10.4668	10.19	2248	0
TCGA.A2.A04P	Basal	4.6053	12.3449	10.3782	6.3167	13.994	11.521	3.6335	8.4621	10.7888	3.6926	10.4306	10.809	9.8393	7.4292	10.1892	8.7305	6.1396	7.6413	9.3993	10.0165	11.9766	12.041	11.1988	11.3629	9.9178	548	1
TCGA.E2.A14N	Basal	6.0492	12.1271	12.313	6.6369	14.7112	10.6393	1.4787	7.1961	11.004	2.3278	11.3694	9.758	8.2208	6.8555	11.6887	8.8767	7.0578	7.5491	7.877	10.907	13.0063	11.2939	12.0298	12.3506	12.0457	1434	0
TCGA.AR.A24S	LumB	7.1908	11.8704	11.3456	7.0991	15.319	10.9034	8.2786	8.3786	9.9358	0.9103	10.1652	10.2652	11.6815	6.2769	10.8337	10.4278	6.8604	6.5352	6.8458	10.5093	12.7955	11.3986	10.0955	11.6881	11.0643	2976	0
TCGA.B6.A3ZX	NA	5.6198	12.4687	11.6585	7.6495	14.7515	11.512	3.9249	9.3982	11.3717	3.7234	10.2478	10.4828	9.6887	6.6614	9.4345	10.0785	7.2333	7.6742	8.6244	9.234	12.5714	12.506	9.7628	10.2833	10.5357	1152	1
TCGA.E2.A10C	LumB	9.3816	12.0392	11.3954	4.3683	14.1824	10.7882	1.9465	7.5248	11.1088	0.5614	9.1893	11.1249	9.5985	8.3509	8.8547	9.502	7.2551	7.9674	11.4691	9.2161	12.3333	11.7176	11.3613	10.3372	11.2053	1220	0
TCGA.S3.A6ZG	NA	7.5142	11.6421	10.661	6.068	14.5667	10.5186	0.3915	7.1868	10.9109	0.3915	10.435	10.076	9.2182	7.4009	9.2703	11.1993	7.5738	7.5768	11.9202	9.7384	11.7628	11.3284	9.8435	10.8768	11.3505	562	0
TCGA.BH.A0BP	LumA	7.0542	11.9843	11.3453	8.6973	14.2129	10.7638	1.8104	7.938	11.0704	0.5864	9.1297	9.4679	10.5507	4.678	9.3035	10.0758	6.7791	7.3397	5.9815	9.1604	11.9676	11.4604	9.9994	10.9074	10.9446	2296	1
TCGA.BH.A0BO	LumA	7.4116	11.9379	11.9853	11.1662	14.3751	10.506	0.4059	7.9347	10.2046	0.7223	7.9134	10.0101	10.6793	5.62	11.0806	10.4004	6.1729	7.533	9.6904	10.3453	11.7473	10.4979	9.6507	10.9077	11.003	2197	0
TCGA.AO.A1KO	NA	6.3332	12.2477	12.8984	9.4781	14.9642	10.7046	0.7391	6.6346	9.993	1.2254	8.973	9.7872	11.3498	4.6981	9.3818	11.1281	7.7535	7.3242	1.7407	9.9498	12.1696	11.69	9.6089	11.7012	10.5124	622	0
TCGA.AR.A24K	LumB	8.8105	12.1628	11.8882	4.8841	15.133	10.4005	0.3717	6.3598	10.3169	0.3717	10.5188	9.4812	8.9312	6.7326	8.6058	10.4659	7.1144	7.29	2.1787	11.24	12.2298	11.4862	10.1365	11.9868	10.4478	1548	0
TCGA.E2.A1LH	Basal	6.8091	13.3293	10.8879	6.7467	14.973	10.5965	0.8252	8.6687	12.199	0	9.6655	10.2171	9.732	7.6992	10.1461	8.3585	7.0466	7.9851	12.2194	10.155	11.2415	11.5298	11.3014	10.9976	10.3182	3247	0
TCGA.BH.A0H5	LumA	8.0093	12.3159	10.7847	7.8253	14.364	10.8785	2.7322	8.6942	10.965	1.8616	9.6898	10.8094	10.9588	5.6352	9.8613	10.6295	6.7782	7.6114	8.392	9.321	12.0173	11.3697	9.9286	10.8199	10.2197	1620	0
TCGA.D8.A147	Basal	6.424	12.1432	13.3491	9.1368	15.3535	10.7449	1.591	8.2851	10.0053	0.4173	11.3113	10.8532	10.319	8.0592	11.9458	11.1258	8.0071	7.2506	9.7767	9.868	12.6895	11.7193	10.251	11.4533	10.8461	584	0
TCGA.C8.A12N	LumA	8.9484	12.257	11.6276	5.257	14.7422	10.6947	9.6284	7.7349	10.7778	1.3854	8.9029	10.2086	10.5309	6.5414	10.0748	10.4773	7.0836	7.7074	6.6975	9.674	11.7507	11.3622	10.4814	10.8196	9.8456	358	0
TCGA.E2.A1LL	Basal	6.1073	12.6439	13.7516	6.9473	14.5409	10.0108	1.4475	8.4485	11.5872	1.4475	10.8168	9.9798	9.0134	7.3884	9.6566	10.3061	7.3315	7.7143	7.6823	10.0715	13.0949	11.1302	10.7614	11.1899	11.0754	1309	0
TCGA.A8.A09T	LumA	8.863	12.0842	10.7766	4.8003	14.6392	10.4813	6.2269	7.0476	10.7198	0	10.2154	9.9774	9.6176	6.0205	8.8084	11.4016	6.1963	7.6488	4.4223	9.803	12.1111	11.5625	10.2752	11.1563	10.306	579	0
TCGA.A2.A1G6	NA	7.3731	12.0129	11.9579	9.8544	14.675	10.5058	1.5856	7.7514	10.1164	1.5856	8.5796	10.2362	11.8815	5.3438	9.9292	10.4505	7.7997	7.3199	3.1163	9.9124	11.676	10.9629	9.9253	11.1615	10.7608	501	0
TCGA.C8.A137	Her2	8.0866	12.218	12.0214	4.6693	15.8176	10.6299	0	5.7435	10.4668	0	10.6075	10.1134	10.3546	5.0168	9.5339	11.3561	5.9682	7.5043	9.1462	9.0511	13.3747	11.3366	10.6463	12.095	12.4268	379	0
TCGA.AO.A03L	NA	8.1669	11.9676	10.7933	6.4814	15.562	10.959	0	7.859	11.1807	0	10.595	10.151	11.1283	6.6824	10.4419	10.9491	7.2271	7.6752	11.643	9.3337	12.9385	12.4494	9.887	10.7441	11.2364	2442	0
TCGA.E9.A295	LumA	8.6153	11.9948	10.6152	7.101	15.989	11.6585	7.9245	7.8659	11.2766	0	9.4216	10.3341	9.8907	7.3971	8.6347	10.5669	7.1886	7.3033	6.0167	9.2719	12.5808	11.7744	10.2997	10.6372	10.7118	375	0
TCGA.A8.A08R	Basal	6.2121	12.6765	12.81	7.3943	15.8855	11.1455	0.9396	7.8254	10.3165	1.6517	11.0335	9.9947	10.5576	8.173	11.6668	10.119	6.7232	7.2753	7.8563	10.4245	12.4449	11.4539	10.5357	11.1213	11.2478	30	0
TCGA.BH.A0B1	LumA	8.3081	12.7995	10.6189	7.4538	15.4234	10.9336	1.0825	7.963	10.1122	0.4569	10.6699	9.8405	9.9371	7.1146	10.1828	11.5729	7.5347	7.0742	9.1612	9.68	12.7385	10.9748	9.9613	11.8884	11.5662	1148	0
TCGA.AR.A24Z	NA	7.6856	12.9902	9.8056	8.0787	15.4631	12.521	5.6566	7.4919	10.4041	1.7177	10.4603	9.856	8.8621	7.8937	10.9113	10.8676	7.1355	7.2487	4.1278	10.1039	12.6665	11.4689	9.8239	11.4937	11.4377	3001	0
TCGA.A8.A07G	LumA	8.2211	12.3196	12.9333	8.2198	14.1874	10.5629	0.7543	7.4939	10.0919	0.7543	10.0335	9.8513	11.3992	6.0863	9.4266	11.3033	6.1647	7.4662	6.3092	9.7691	11.8748	11.6251	10.0713	11.45	11.1399	577	0
TCGA.B6.A0I8	LumA	6.7461	12.2748	10.1573	5.3149	15.6358	11.4994	0.7009	7.7707	9.7812	0	8.3093	11.0607	9.8417	6.7539	8.3486	10.6863	7.5152	7.901	12.2658	9.422	12.4079	12.5582	9.8721	11.4664	11.0777	749	1
TCGA.LD.A7W6	NA	8.0948	11.8698	9.8511	7.9642	14.1924	11.6005	1.7078	7.7697	11.0031	0.4624	10.1117	10.6697	10.436	6.4626	11.0547	10.672	7.959	7.7993	12.0943	9.5232	11.5917	11.1379	9.7452	10.6663	9.5734	404	0
TCGA.E9.A1NH	LumA	8.4376	12.1696	11.6655	6.2727	14.2618	10.9755	7.0976	7.491	10.565	0.9218	8.8281	10.7115	10.741	5.6423	9.5267	10.6764	6.3207	7.5194	7.8896	9.2241	11.7567	11.0889	9.6296	10.7831	10.3341	576	0
TCGA.BH.A0B7	Her2	6.7094	12.6341	12.915	8.1424	14.6512	11.5646	3.4127	7.3853	10.5596	0.4408	9.8486	10.3369	10.9388	4.7589	9.2803	10.4066	5.9734	7.054	8.9992	9.664	12.8405	11.043	9.8714	11.3545	10.926	2559	0
TCGA.E9.A1NC	NA	7.2877	12.4037	11.7714	9.6177	14.9613	10.8663	0.5591	9.5756	11.2845	0.961	10.0235	10.7577	9.9789	6.4367	11.4527	9.2304	6.8344	7.5866	12.6756	9.9578	13.0239	11.9033	10.1212	10.4297	10.599	1203	0
TCGA.A2.A0EW	LumA	8.5605	12.1629	11.5894	10.1577	14.2397	12.418	0.4374	7.4966	10.5361	0.4374	9.1365	10.2458	11.2765	5.5254	9.5222	10.8509	7.2026	7.2403	6.1597	9.2749	12.0472	11.3257	9.9094	10.8926	10.6155	1884	1
TCGA.AO.A0JF	NA	8.6071	12.0804	11.6336	8.631	14.1538	10.5741	1.3433	7.6333	10.3566	0.8226	9.0208	9.6645	11.4563	5.4387	9.7352	10.5465	5.1688	7.5647	7.8092	9.8007	12.4251	11.1226	9.8781	11.0077	11.2501	1980	0
TCGA.C8.A26V	LumB	7.7439	12.531	12.3281	5.1	15.1482	10.2343	5.6881	7.487	10.8171	0.5315	10.0468	10.0685	9.1452	5.7222	10.339	11.0935	6.8845	7.129	6.6097	9.9501	13.2773	10.9306	10.5772	11.6979	10.2908	616	0
TCGA.AR.A24P	LumA	8.3961	12.1382	12.4253	7.3579	14.1989	10.3128	0.6586	7.4261	10.2826	0.9014	10.3414	9.5124	11.2228	6.7458	9.6632	11.6865	7.1369	7.5109	10.1445	9.9869	11.8644	11.9383	9.9074	11.3114	10.4997	84	0
TCGA.AR.A1AP	LumA	7.2408	12.0778	12.2836	6.3128	14.3454	12.1796	1.2324	8.6792	10.8619	0.5359	10.4022	9.3936	10.4	5.8067	10.0238	10.8493	6.8088	7.368	8.6839	8.5238	11.9564	11.5865	10.144	10.9079	10.6265	2856	0
TCGA.B6.A1KN	LumB	7.4488	11.6183	11.0098	6.8638	15.5323	11.3089	0.9064	7.7536	9.1361	1.1149	10.9353	10.0861	9.9695	6.4773	10.1895	11.316	6.3477	7.0682	12.7261	10.067	12.6986	11.3011	10.7372	12.2774	12.5045	4233	0
TCGA.BH.A0C7	LumB	3.8626	11.6246	10.7868	6.9072	14.8732	11.3634	0.334	7.5982	10.9372	0	11.5104	10.2392	10.4644	8.3092	10.7643	11.4213	6.8187	6.8204	11.6036	9.0768	11.9911	12.0934	10.1596	11.6453	10.5909	2767	0
TCGA.AR.A250	NA	8.4017	11.7559	11.8786	6.3472	15.4904	11.5451	1.073	7.8071	9.9672	1.6814	9.9552	10.1788	10.7145	6.3513	9.5585	10.3453	6.5671	7.0482	11.8123	9.7192	12.1636	11.3419	9.8138	11.3742	11.2504	2707	0
TCGA.3C.AALI	NA	6.8204	12.0066	10.0097	5.4723	14.8846	11.8591	0.6265	8.7861	11.1958	1.6668	11.2154	9.6717	9.355	7.0921	9.4607	9.0307	6.9843	6.9209	9.3842	8.741	11.422	14.4442	10.3329	11.2947	11.0599	4005	0
TCGA.BH.A1EY	LumA	7.6469	13.1393	10.8369	5.9509	14.6764	11.6265	2.293	9.189	10.778	0.573	9.3181	10.248	11.3652	7.2613	9.746	10.9361	7.0385	7.0933	11.1075	8.9511	12.4125	10.5237	9.9245	11.0541	11.7539	538	1
TCGA.BH.A0B8	LumA	8.401	11.6667	10.2325	5.5096	15.6232	11.0377	0	8.3369	11.1515	0.5452	10.4799	10.2391	8.74	7.0788	9.3088	11.6106	6.7851	7.459	7.5537	10.635	13.1753	11.8023	9.5238	11.0713	11.3498	1569	0
TCGA.A1.A0SE	LumA	8.8006	12.3582	11.6017	8.0111	15.327	10.2342	8.6182	7.1381	10.7974	0	10.2302	10.5755	11.0428	6.2598	9.0813	10.9918	6.9163	7.8123	5.9667	9.6581	12.293	11.4435	9.9279	11.2327	9.7414	1321	0
TCGA.E9.A1NI	LumB	9.4451	12.334	10.7204	4.231	15.2172	10.9319	6.1576	8.2574	10.4756	0	9.9315	10.9926	9.7929	7.3188	10.0596	10.9145	6.8608	7.8993	10.1358	9.7301	12.2236	12.6553	10.7354	11.252	10.2994	300	0
TCGA.AO.A12A	NA	8.2084	11.8475	11.9223	8.309	14.6117	11.0536	1.0169	7.4171	10.7288	0	9.2315	10.3944	10.6647	5.9829	9.8296	11.0182	7.2267	7.5648	3.9058	10.018	11.8221	11.5201	10.034	10.9706	9.9682	3112	0
TCGA.E9.A5UO	LumB	8.9216	12.6096	11.4191	3.4719	15.024	11.7009	0	8.9745	11.5239	0.4783	11.0896	11.003	0.947	9.3249	9.1752	10.8645	6.173	9.0788	4.7093	9.0577	12.171	11.7887	9.5596	10.8449	10.9247	785	0
TCGA.AR.A254	NA	6.9703	11.8657	12.7612	6.2598	15.2067	11.0295	1.1127	8.5067	10.0352	0.368	10.5063	9.8658	11.6051	5.3304	9.942	11.3358	6.568	7.708	12.0348	10.4369	11.8959	11.9009	10.1857	12.3164	10.7417	2605	0
TCGA.LL.A440	LumA	6.9543	12.0397	11.9002	8.8898	13.9574	11.6874	2.6631	9.248	11.2265	1.737	9.1949	10.27	11.4524	6.6126	9.5838	10.2867	8.0188	7.3838	4.6631	9.3085	11.5865	11.1097	9.3809	10.4188	10.4099	759	0
TCGA.D8.A1XS	LumB	8.1787	11.7263	12.1237	5.8735	15.1969	10.5112	1.8601	7.6692	9.9958	0.664	10.1942	9.9838	10.6399	7.5532	8.9739	11.2195	7.26	7.3428	8.4738	10.0369	11.7891	12.2489	9.7734	11.5791	11.1807	496	0
TCGA.D8.A1JD	LumB	8.197	11.8528	11.0818	5.594	15.3243	11.8758	5.7513	7.7939	10.5183	0	10.9285	10.0362	10.4644	6.8804	9.6281	11.0692	6.3403	7.4259	5.7513	10.0966	11.9024	11.2992	9.735	11.6664	11.9836	552	0
TCGA.BH.A18K	NA	8.7922	12.043	10.4656	6.4026	15.1856	11.248	0.7726	7.757	10.261	0.7726	9.2044	10.9528	10.4415	6.6507	9.4838	10.84	7.1384	7.5734	11.4257	9.3803	13.1397	11.5505	10.9	11.2358	10.6102	2763	1
TCGA.BH.A6R9	NA	5.9273	12.4045	13.7434	8.3448	14.3876	11.4285	1.1515	8.7784	11.0748	2.0899	8.8023	10.4696	11.811	6.6429	10.6264	10.1572	6.7006	7.6149	1.9449	9.83	12.2191	10.8709	10.1117	10.6434	10.341	160	0
TCGA.GM.A2DD	NA	7.9823	12.7711	10.1763	7.4189	14.6642	10.8778	2.1517	8.0481	11.5894	1.3079	9.6259	10.363	9.8393	6.5142	9.8744	9.8071	6.9597	8.1162	10.9427	9.3678	12.5389	11.2826	10.4242	10.8585	10.7868	2282	0
TCGA.AO.A126	NA	7.8817	12.4107	10.8097	6.604	14.5553	10.2318	4.2598	7.3332	11.8106	0	9.3761	10.698	9.4623	6.4811	8.4246	9.5079	7.1164	8.1029	4.8194	9.5242	11.7696	11.3878	10.8195	10.9255	9.8128	3307	0
TCGA.AN.A0XT	NA	6.2077	11.3174	11.3978	7.4153	14.9447	11.271	2.2877	8.0119	9.8965	0	9.4581	10.3567	8.9931	4.3523	8.5139	10.5661	7.4321	7.4747	11.0043	10.4899	12.3845	10.1834	9.9428	11.1148	9.5963	NA	NA
TCGA.A1.A0SH	LumA	8.8467	12.16	13.2025	7.0834	14.6938	10.7974	0	7.4666	10.6749	0.7843	9.5291	10.1649	12.1508	5.7351	8.764	10.5879	6.669	7.5826	6.9177	9.3403	12.4478	11.5025	9.7666	11.0916	10.3303	1437	0
TCGA.LL.A740	NA	9.6269	12.9938	11.3439	5.268	16.0235	11.3817	0.4892	7.4175	11.0378	0.4892	9.0116	9.4633	9.7697	6.6024	8.4686	10.3671	6.6714	7.809	10.382	9.1696	12.5038	12.421	10.4204	11.2909	11.3546	441	0
TCGA.AN.A0XN	NA	7.9283	12.329	12.8128	6.2939	14.5137	10.7482	4.3168	8.2425	10.9202	0	9.682	9.8902	11.027	5.6429	9.8124	10.0322	6.1444	6.7361	7.2378	10.2823	12.0102	10.851	10.0037	11.01	11.4625	NA	NA
TCGA.PE.A5DD	NA	8.044	11.3082	10.2393	6.2904	14.5084	12.0914	2.6931	7.7022	11.5716	0.9957	10.1898	10.7682	9.4442	6.2051	8.5876	9.7899	7.7125	6.7463	10.2087	8.2675	12.4732	10.4187	10.4187	10.3483	10.1462	1953	0
TCGA.AO.A0JE	NA	8.1811	12.6368	12.7933	5.9692	15.3557	10.8569	0.8571	8.1067	10.5319	1.3911	10.5453	10.4647	11.1714	6.7236	10.786	10.7164	6.8606	8.0326	10.182	9.8131	12.7877	11.5767	9.6689	10.8859	11.6239	2335	0
TCGA.AO.A0JG	NA	7.7016	11.3256	10.7439	7.1445	16.5789	10.8783	1.6517	7.3665	10.3605	0.6889	9.0459	11.094	9.8723	4.6351	9.3002	11.2748	6.9999	7.6672	3.0607	9.0018	11.5609	11.1764	9.8879	11.57	11.2422	798	0
TCGA.A2.A0D3	LumA	8.6868	11.9715	11.6058	5.6864	15.1878	10.3433	0	7.3588	10.3998	0	9.4047	10.2919	9.3713	5.4956	7.8409	11.541	7.1322	7.7914	9.9355	10.3044	11.5672	12.1355	10.1813	11.2013	10.3625	1873	0
TCGA.B6.A0X0	LumA	8.3721	12.4656	11.9145	5.3745	14.5935	11.1749	0.6816	6.618	11.3056	0	10.005	10.2671	9.0202	5.8867	8.729	10.8688	7.0382	8.1842	8.24	10.0277	12.4423	12.1655	10.0786	11.0706	8.9842	3945	1
TCGA.B6.A40C	NA	8.1534	12.0961	10.1338	6.1377	14.639	11.6542	9.1859	7.8633	11.3307	0.3498	10.1871	10.6881	9.6152	7.6537	9.5031	10.3539	7.5323	7.5598	7.5744	9.5677	11.9197	11.3217	9.8505	10.6964	9.5986	2164	0
TCGA.OL.A97C	NA	7.1848	12.4705	13.7335	7.4146	14.2854	11.2406	1.8879	6.6669	11.894	2.5177	9.8602	10.6432	11.7817	6.3285	8.7788	10.0094	6.4388	6.8637	2.3367	9.2416	11.9463	11.0391	9.7959	10.7227	9.7626	271	0
TCGA.B6.A0IB	LumB	8.8863	11.726	8.0969	5.1666	15.2353	11.2739	7.8116	8.2999	11.1323	0.404	10.542	9.7921	7.1401	6.7261	8.671	9.7451	6.8262	7.8033	9.5461	10.3446	12.4528	11.8432	10.3457	11.1045	10.727	3941	1
TCGA.WT.AB44	NA	7.7927	11.6828	10.4961	5.8608	14.3486	11.0221	0	8.0179	10.5227	0	7.3277	10.4839	9.2246	8.1367	9.2856	9.4066	7.9624	7.7873	7.6537	9.9616	10.5637	10.643	10.9633	10.9026	10.3013	883	0
TCGA.OL.A5S0	NA	7.1177	12.9461	10.3513	7.0288	15.7077	10.2754	0.5916	7.9416	11.616	1.5982	10.9464	10.6057	10.2309	7.5964	11.0463	9.0141	6.5431	7.1229	12.3652	8.8715	13.3828	10.778	11.5887	10.8372	9.7519	620	0
TCGA.A8.A085	LumB	7.4758	12.1432	10.5752	3.4233	15.2832	11.2105	9.2305	7.3595	10.0915	0.3124	11.9077	9.3319	8.958	7.8917	9.2374	11.2223	5.8354	7.8409	11.7771	9.3939	14.0365	12.3407	9.8289	11.0696	11.3558	1124	0
TCGA.C8.A8HQ	NA	8.8764	11.7845	10.4462	6.1299	14.9676	10.9084	6.7349	8.152	11.1878	1.6178	10.4639	10.4716	10.8561	7.5772	9.5062	10.2416	6.4858	7.9046	12.1662	9.5711	12.2292	11.6157	10.4942	11.6001	10.096	380	0
TCGA.A8.A06Y	LumA	7.822	11.7838	10.9991	11.9035	15.3092	11.3111	2.8504	8.1864	10.7754	0	8.6326	9.7157	6.4941	5.1408	9.4657	11.4241	6.6375	6.9001	5.7551	9.4211	12.4683	11.476	10.5529	11.7133	10.1072	791	0
TCGA.LL.A7T0	NA	6.6689	11.6358	9.7533	5.016	16.0739	10.8288	4.1658	8.7336	11.3645	0.9572	11.1031	10.6085	8.5271	8.587	9.4201	10.0199	7.0534	8.1756	6.9746	9.7239	12.5442	11.5185	10.3285	10.8995	11.2084	376	0
TCGA.A7.A6VV	NA	6.1234	12.3815	12.7613	7.2863	14.7869	11.3839	0.8048	7.6523	10.8747	0.4578	12.2925	10.2077	9.9093	6.9811	9.985	9.186	6.4449	7.9358	3.6949	10.0556	12.1183	11.4307	9.9855	11.1731	11.1294	313	0
TCGA.A2.A1FV	LumA	4.5745	11.4274	10.9823	8.2447	15.7426	10.2934	10.4202	5.0291	9.3277	0.6859	9.0547	9.6249	9.852	6.1302	8.8232	11.2229	7.5012	6.1497	1.3344	10.8942	11.3886	9.511	10.1172	11.8477	11.5363	714	0
TCGA.A7.A0CH	LumA	8.5682	11.7558	11.0178	8.3113	14.4399	10.42	0	6.5597	10.0414	0	9.5555	10.0197	9.0159	5.5627	8.7147	11.0212	6.9642	7.7016	10.6741	9.8698	11.4905	11.5571	10.1176	11.173	10.0372	1079	0
TCGA.A8.A08B	Her2	8.6225	12.4758	10.4669	3.609	15.3915	11.0055	5.4397	6.5372	10.7696	0	10.9343	10.5147	7.359	6.5299	11.0458	10.9601	7.0221	7.4146	10.4821	9.1679	13.1322	10.7637	10.532	11.8882	10.296	1156	0
TCGA.EW.A1J1	LumA	9.7982	11.8792	11.2347	4.4689	15.5119	10.9271	8.5135	8.3879	10.2089	0.4014	9.43	9.8995	7.9035	5.5459	9.5688	11.3289	6.5304	7.3202	5.0197	9.1889	11.8243	10.0376	9.9815	11.5221	10.753	575	0
TCGA.A8.A07L	LumB	7.6122	12.6592	11.2847	4.8613	15.2924	11.7035	5.721	8.6323	10.3426	1.2454	12.0857	10.0272	9.6111	7.1507	9.1666	11.3376	7.1724	7.2229	8.7064	10.6925	12.678	11.8028	10.438	12.1204	11.417	975	0
TCGA.AR.A24H	NA	7.7727	11.5485	9.3252	6.1524	15.5262	11.2677	3.1591	7.9036	9.9743	0.3025	11.0899	10.7669	9.1796	7.8857	10.6065	11.6425	7.8474	7.2386	9.4864	10.3356	11.3712	12.7315	9.5729	12.0679	12.3705	4894	0
TCGA.D8.A27F	Basal	6.044	12.0445	13.9726	9.0974	15.384	11.23	0.8578	7.2435	11.8864	1.8904	11.6074	10.459	11.1924	7.3288	11.2006	10.3914	7.5876	7.1559	9.7794	10.8137	12.7462	11.8725	10.4087	11.7457	10.6919	488	0
TCGA.A2.A0YC	LumA	8.7293	11.877	10.5866	6.3256	14.9413	11.1943	11.1959	7.5551	10.4529	0	9.6111	10.103	9.7103	6.466	10.235	10.9106	6.9838	7.4927	6.6615	9.482	11.7336	12.1213	9.7416	11.2013	10.7721	990	0
TCGA.E9.A3Q9	LumA	8.1498	12.4098	8.3549	8.6794	14.637	10.8505	3.837	8.1773	10.597	1.1195	8.8875	10.2575	9.2472	5.1485	9.817	10.7493	7.3746	7.2835	8.9158	9.6951	11.9542	10.8753	9.868	10.9934	10.0792	1001	0
TCGA.AN.A041	NA	8.295	12.2048	11.504	5.9327	14.7044	11.524	5.1237	7.6831	10.0608	0	10.5181	10.2954	9.8533	7.1749	9.2005	10.7919	6.9943	7.343	13.0009	9.6572	11.9382	12.4388	9.7756	11.3849	11.2862	NA	NA
TCGA.EW.A6SD	NA	6.7471	12.332	13.6751	4.1768	15.4939	11.2852	0.8781	7.6165	11.0113	0.5049	11.0896	10.2891	9.8521	5.6732	9.4587	10.5859	5.9965	8.0056	10.0294	8.8605	12.8896	10.6967	9.868	12.0034	11.0579	1010	0
TCGA.A8.A09M	LumB	8.016	12.2584	9.2226	4.5914	15.7751	11.4813	0	8.8075	10.5624	1.0475	10.4616	10.0587	9.0557	7.4443	10.7298	10.4157	6.595	7.2561	6.6161	9.6594	11.4698	11.7738	10.2167	11.8182	11.1165	1006	0
TCGA.A2.A0CZ	NA	8.3221	12.6066	12.2231	10.4245	14.9855	11.1935	0.9652	7.4138	11.2712	0.9652	8.4767	10.4649	11.713	5.7787	9.1282	9.797	6.5742	7.541	2.9386	9.8298	12.0903	11.5737	10.1434	10.4634	10.4552	1616	0
TCGA.BH.A1FH	LumA	6.567	12.0634	12.991	9.5284	14.2945	11.2721	5.3771	7.237	10.4676	0.9478	9.0179	10.2264	11.788	5.0748	9.6788	10.7023	7.3481	6.8291	6.1045	9.5941	11.5823	11.8708	9.6875	11.0045	10.9868	1034	1
TCGA.AO.A1KR	Basal	6.8996	13.5618	8.3521	5.6082	15.3002	10.6448	0	8.4574	11.5682	1.878	11.5068	10.2563	8.3595	7.8782	10.6284	8.7293	9.0022	8.0401	5.6959	10.5043	12.7895	12.2377	11.8211	12.2311	10.5636	2513	0
TCGA.E9.A1NF	LumB	8.3626	12.973	12.069	6.1084	14.4103	11.0846	1.7977	8.2817	11.2185	1.5148	9.5618	9.9787	11.9481	5.9631	9.9255	10.6136	6.5238	7.651	9.1564	10.1441	11.9582	11.5024	10.7742	11.5403	11.4191	1072	1
TCGA.A2.A0ET	LumA	7.1889	11.2794	7.9886	8.0214	16.0353	11.4623	9.9711	7.4026	10.2412	0.6245	9.8845	10.487	6.5888	7.1279	9.9264	12.0149	7.4232	7.9669	6.801	10.167	12.191	11.455	9.8417	11.5802	11.514	1066	0
TCGA.BH.A0DO	LumA	7.5461	12.0978	12.4907	8.4355	14.2975	11.3257	6.273	6.8264	10.6488	1.0674	8.8134	10.1684	10.6301	5.1056	9.195	11.0615	6.987	7.1421	9.4611	9.5565	12.3407	10.8991	10.2032	11.1254	10.2819	1644	0
TCGA.A2.A0CU	LumA	9.1824	11.9237	9.731	7.3454	15.3352	10.9829	3.7245	8.5906	10.5342	0.4665	10.2841	9.7586	9.3358	7.5802	7.8195	10.8777	6.1237	7.2926	10.8053	9.4348	11.585	11.7017	9.9907	11.3456	10.0651	158	1
TCGA.D8.A1JE	LumB	8.3403	11.6865	11.0736	6.0046	14.3938	10.3683	3.0695	8.141	9.2552	0.3611	10.1401	8.9866	10.9396	5.7786	10.7641	11.5631	6.1663	6.572	10.8883	9.3934	12.9805	10.7437	9.6555	11.5408	10.0325	575	0
TCGA.AC.A8OR	NA	7.0108	12.6054	12.7832	3.9712	15.0669	11.6675	8.6195	8.592	11.3538	1.5735	9.5743	10.4468	4.6374	6.9737	9.5901	10.5938	7.1972	7.9715	2.985	9.2968	12.0792	11.2601	9.778	10.5928	10.2618	40	0
TCGA.AC.A2FK	NA	7.3863	11.8867	13.0345	11.48	14.8019	10.7912	0.9179	7.3034	10.2984	1.875	8.3665	10.3825	12.7518	4.9081	9.919	10.8806	7.3316	7.4316	6.4025	9.6788	11.7048	11.3098	9.4364	11.0763	10.4163	2650	0
TCGA.A2.A04W	Her2	5.9804	12.581	13.0261	5.2606	14.4218	10.3151	1.6605	7.627	11.2571	0	10.123	9.5264	10.542	5.7139	7.715	9.2018	5.2381	6.9118	13.4068	8.9836	13.1152	10.8596	10.6568	10.844	11.0326	3102	0
TCGA.AR.A5QP	NA	7.708	11.8287	10.8884	7.2234	14.468	11.0254	0.8495	7.7025	11.0545	1.1394	10.4148	10.3279	10.3653	6.5758	9.2366	10.869	7.1552	8.1542	7.4612	9.667	11.9143	11.3877	10.7356	11.2577	9.7187	1185	0
TCGA.BH.A0DK	LumA	6.6697	12.1079	11.5964	7.5143	14.9011	10.5378	0.5361	8.3364	11.2647	0.5361	10.4162	10.3654	10.9713	6.4598	10.3947	10.2036	6.3094	7.6071	11.7845	9.7055	12.9069	12.059	10.3787	10.8443	11.6118	423	0
TCGA.A8.A086	LumA	8.3871	11.9891	11.2712	5.8948	15.1266	11.4701	6.0783	7.4672	10.8588	4.9249	10.8518	9.5175	10.5226	7.851	9.7209	11.2448	6.6404	7.2999	9.4255	10.6606	12.1289	11.2832	10.1202	11.2005	10.7373	396	0
TCGA.A8.A09B	LumA	9.114	11.6064	10.8669	6.0867	15.5511	10.8193	9.5578	8.2364	10.9062	0.4311	10.3499	10.3029	10.0476	7.0178	8.605	11.2791	7.3545	7.643	9.8909	9.3525	12.0469	11.3305	10.0492	11.3033	9.5464	365	0
TCGA.E9.A6HE	NA	8.7484	12.4499	9.6842	5.6581	15.0883	11.2936	3.8879	8.1555	12.2029	0.4682	10.7638	10.5491	9.8367	7.7849	9.5607	9.6516	6.4538	7.8059	2.8349	9.8636	12.6912	11.8105	10.5182	10.6951	8.8927	847	0
TCGA.A2.A0EN	LumA	8.0346	11.7481	10.9492	9.0849	14.4927	10.9591	3.3571	8.8435	10.8123	0.4116	8.9104	10.1372	10.32	5.895	10.3938	10.6599	6.7616	7.3471	10.1431	9.4555	12.1992	10.7506	10.3721	10.9456	10.8567	4088	0
TCGA.D8.A27G	LumA	4.4832	12.2031	11.5863	6.0988	15.0235	10.7282	3.284	7.6814	10.7177	1.3888	8.9784	10.0949	10.6105	5.6003	8.915	10.7463	6.7704	7.3127	7.1214	9.2632	12.2982	12.2003	10.1628	11.0935	10.9023	409	0
TCGA.BH.A0HA	LumA	9.4047	12.9307	11.0095	6.7213	14.4122	11.025	2.8136	8.0266	11.1936	0	9.5819	10.7645	10.0902	7.3847	10.1038	9.9171	6.1879	8.1114	5.1615	9.6936	11.5518	11.5552	10.8493	10.9687	10.1599	1611	0
TCGA.4H.AAAK	NA	7.9752	12.1241	11.4198	6.8207	14.6513	11.4189	0	7.7683	10.3576	0	10.3067	10.4399	10.9267	6.7809	9.6115	10.4536	7.0066	7.6045	5.3576	9.6601	11.994	11.402	9.7711	10.932	10.0402	348	0
TCGA.E2.A1LK	Basal	8.1372	13.1854	13.119	12.2709	15.1246	11.0995	0.6662	7.1543	11.1485	0	10.406	9.7046	7.347	7.2622	10.8563	9.9069	6.0979	8.2911	13.6035	9.964	12.2716	11.6707	10.3808	11.6392	10.7497	266	1
TCGA.3C.AALJ	NA	7.9571	12.4457	10.1137	5.8267	14.8758	11.9186	0.931	8.5936	11.0103	1.4922	10.1302	10.2659	9.9828	6.3108	8.7323	10.1371	6.3164	7.9832	5.7191	9.4324	11.6416	11.867	10.418	10.7304	10.8452	1474	0
TCGA.S3.AA15	NA	5.5222	12.869	11.9142	7.6899	14.6944	11.4913	1.497	9.0337	11.1189	3.0514	11.1154	10.8831	11.7646	6.5686	10.4933	9.3825	7.2664	7.6589	7.2037	9.3098	12.5036	11.5995	10.0744	10.4902	10.9608	525	0
TCGA.AR.A0U3	LumA	8.6995	12.0278	9.8175	5.6361	15.4096	10.8598	7.6112	8.2663	10.9508	1.0982	10.6095	10.3442	8.5835	6.1096	9.1027	11.5408	7.2869	7.5245	2.7451	10.2959	12.8846	11.379	10.3786	11.4332	11.4213	4080	0
TCGA.E2.A10A	LumA	7.1526	11.3282	11.6375	4.499	15.3131	11.6947	0.9781	8.4677	9.969	2.0816	10.6342	10.638	9.3377	6.7449	10.0478	11.424	6.0226	7.9199	8.4317	9.7782	11.6453	11.3571	10.1014	11.3042	11.2669	1229	0
TCGA.B6.A0X5	LumB	9.3016	12.3567	8.7215	3.3269	14.633	10.6585	0.5533	8.448	10.518	0.5533	11.0233	9.7984	8.7402	7.7581	9.5972	10.3148	7.0276	6.4507	5.3644	9.4565	12.9857	10.9147	9.9092	11.6154	11.5796	2097	1
TCGA.E2.A15E	LumA	8.251	12.0771	12.1773	8.5999	15.0325	11.5507	3.9705	7.0285	10.1842	1.8198	9.7538	10.4215	10.8971	5.987	8.8183	11.0869	7.4931	7.9362	6.525	9.312	12.6203	11.551	10.3656	11.3217	10.3989	630	0
TCGA.AC.A8OP	NA	7.8048	11.6214	10.6171	7.4592	15.2406	12.331	3.8013	8.4929	11.581	2.3622	8.9219	9.7703	9.4943	6.7145	9.1921	10.6935	6.1992	7.1319	8.6462	9.4573	12.1015	11.406	9.7109	10.626	11.1638	614	0
TCGA.GI.A2C9	Basal	5.9951	12.4117	13.4294	9.7284	15.3521	11.0563	2.002	8.3155	11.6485	3.1178	9.4504	10.3114	9.5815	6.5277	10.4244	9.9135	7.5709	6.1792	10.7169	10.7433	12.3194	10.9554	10.5078	10.8225	10.8916	3342	0
TCGA.D8.A73W	NA	8.0936	11.6993	11.9777	12.3285	14.5087	11.3148	0.8766	8.7702	10.5368	0.504	8.7949	10.1635	10.0601	6.2397	10.8373	10.5862	7.3798	7.4014	12.8506	9.5915	11.4664	10.8241	9.7371	11.4116	10.988	385	1
TCGA.BH.A18Q	Basal	6.1732	12.9657	13.3136	8.3347	15.0708	11.1631	0	7.4694	10.5863	1.6406	12.2505	10.3594	10.0149	6.4819	11.0658	10.6663	7.9662	7.1243	3.4253	10.1376	11.8303	12.3919	8.6348	11.7136	11.6583	1692	1
TCGA.HN.A2OB	NA	7.6158	12.0401	12.3677	8.2871	14.3892	11.3186	0.5357	7.1053	11.1265	0	8.8101	10.4543	12.0033	5.6039	8.5197	10.3348	7.5924	7.5958	7.9997	9.3499	11.5421	11.2823	9.4918	10.7319	10.1073	1900	1
TCGA.AR.A5QN	NA	8.9185	12.0003	10.2853	8.3751	14.3353	11.6709	3.9859	8.3109	10.9724	0.6834	10.1176	10.0304	9.3889	7.2537	10.961	10.6815	6.7661	8.0275	11.1073	9.0505	11.5889	11.2364	10.1491	10.925	10.3349	1013	0
TCGA.E2.A14P	Her2	7.3362	12.6247	12.1884	6.7234	15.1279	10.8882	0.4859	7.7201	11.2057	0.8488	11.8649	9.1397	8.7228	6.3402	7.7146	10.0567	6.8168	7.684	7.8978	10.2869	12.226	13.8064	10.3293	10.8981	12.2438	1246	0
TCGA.A2.A0YM	Basal	6.9207	12.4233	13.5719	5.2168	15.5016	10.9562	4.1764	10.3109	11.3296	1.123	11.8798	10.7283	9.8404	7.832	12.3138	10.0964	6.957	7.3511	9.3977	12.4199	12.7663	11.7668	9.3438	11.2235	10.1805	965	0
TCGA.D8.A1XL	LumB	7.9537	12.4381	9.3368	3.3463	15.7381	10.5293	4.1731	7.6409	10.769	0.9482	11.9617	10.625	8.8633	7.8471	11.3776	9.6992	6.0725	7.8854	6.5726	9.9507	13.3008	12.4712	11.0698	11.3227	10.4324	606	0
TCGA.C8.A12P	Her2	8.2625	12.4872	12.4108	4.9799	15.5379	11.0852	0.819	7.5446	11.0991	0	10.5493	9.4199	10.562	6.5244	9.0995	10.6281	6.179	7.65	10.2114	8.912	13.6669	14.1217	10.6784	11.0531	11.3713	358	0
TCGA.A1.A0SQ	LumA	9.7648	12.3377	12.9801	6.2892	15.2386	12.182	8.4343	7.336	10.5443	0	10.41	9.8731	9.1501	6.3772	8.7598	10.7974	6.6647	7.6518	13.0088	9.5856	11.7146	10.986	9.8928	11.6046	11.032	554	0
TCGA.LL.A6FP	NA	8.1425	12.0684	6.0412	3.671	15.564	11.8231	0	7.0376	10.9981	0.7416	9.9917	10.2865	5.2997	6.8821	6.4709	9.7258	7.7664	8.1931	14.2182	8.6287	12.0981	11.2629	11.05	10.8401	9.3214	677	0
TCGA.BH.A18V	Basal	5.7288	12.049	12.4374	8.7864	15.6815	11.3052	0.7337	9.9922	10.255	1.7312	11.7384	10.457	10.5756	6.7278	10.9118	10.6485	7.0398	7.6876	11.4431	9.7477	12.1879	10.9148	11.1881	10.7404	11.0461	1556	1
TCGA.E2.A15D	LumA	8.3302	11.7225	12.4755	7.0311	14.7964	10.6645	7.1334	7.76	10.3272	1.0362	8.9981	10.3221	10.0084	5.821	8.604	11.1695	7.303	8.0485	8.2412	10.2088	11.3154	11.6151	10.103	10.8833	10.0232	526	0
TCGA.AN.A0FK	LumA	8.5495	12.0343	9.6857	8.4318	15.7505	11.7799	4.521	7.8472	10.7602	0.8027	9.9976	10.0298	8.1788	6.6917	9.8147	11.1444	6.7425	7.2942	10.6914	10.2844	12.8701	11.2458	10.3347	11.1122	10.744	213	0
TCGA.GM.A2DK	LumA	7.9364	12.5639	9.2859	8.5337	14.7507	11.4501	2.2666	8.9122	10.9114	1.539	9.3325	10.0391	9.9619	8.2555	10.4648	9.7877	5.3245	7.029	8.0102	9.4697	11.2922	11.4718	10.4634	10.5896	11.1188	2645	0
TCGA.A2.A25E	LumB	7.7492	12.6564	10.0632	6.2107	15.744	11.2832	4.8574	8.334	10.0517	0.3945	10.093	10.7319	9.8598	7.6985	9.6743	10.9915	6.8552	6.9129	8.0178	10.059	12.2011	12.4655	10.1185	11.9298	12.5322	3204	0
TCGA.E9.A1N6	LumB	7.7814	12.2665	11.4877	7.6361	15.2531	11.904	5.6691	7.9979	10.8278	2.2632	10.9706	9.8474	10.7011	6.3778	9.7512	10.8195	7.2304	7.3901	6.0253	10.1357	12.5675	11.8979	9.8848	11.3295	11.7842	678	1
TCGA.E2.A15P	LumA	7.5751	12.3758	11.1025	7.4301	14.7803	11.5146	0.6299	8.0859	10.3125	0	9.4344	10.1589	10.8341	6.3927	9.4986	11.8162	7.0397	7.8632	6.9011	9.8259	11.889	11.324	10.2363	11.5311	10.8904	595	0
TCGA.BH.A0DH	LumA	10.7226	11.6429	9.5893	6.5399	15.0798	10.7194	2.0039	7.5463	10.9072	0.8096	10.7213	10.6989	8.9382	6.4293	9.3795	10.8237	5.7567	8.0324	8.4936	8.8017	11.9921	11.1972	10.5922	11.7445	10.6531	1156	0
TCGA.A8.A091	LumA	6.0308	11.3201	12.0003	6.0495	14.9598	11.07	5.0367	6.8123	10.0385	0.5749	9.835	10.2185	9.1901	6.8762	8.4199	10.8664	7.4496	7.1793	6.7644	10.0151	11.5462	10.8099	9.7428	11.1004	9.9655	1004	0
TCGA.AN.A0FT	LumA	8.2224	12.6383	9.6367	6.0692	15.0754	10.5727	9.5768	7.8361	10.2653	0	9.006	11.2561	10.0163	8.2655	8.8158	9.1926	6.8988	8.2502	12.6181	10.1744	11.7731	11.9675	10.3383	11.1039	10.6455	214	0
TCGA.AR.A1AM	LumA	8.9002	12.3519	11.6465	7.3304	14.738	11.1512	0.7714	7.5516	11.1664	1.2712	9.192	10.7049	10.9406	6.0139	9.6836	10.3886	7.5357	8.2855	3.9533	9.628	11.8613	11.1648	10.0975	10.8054	10.1164	2991	0
TCGA.E2.A15T	LumB	8.5803	12.1272	9.2767	4.579	15.9502	11.0028	7.6633	7.4828	10.4507	2.5124	10.8883	10.0736	8.724	7.6543	8.0591	11.6639	7.0739	7.1192	4.8849	9.7113	11.3877	11.7273	9.4937	11.6541	10.7823	1563	0
TCGA.C8.A1HK	Her2	6.7817	12.3607	12.1457	5.4639	15.8629	9.8029	0.5851	6.3491	9.5975	1.3222	9.7627	10.0958	8.6138	5.4952	9.0461	10.9436	6.3491	7.5239	7.8364	9.471	12.9311	11.9636	10.3491	11.1367	11.4756	366	0
TCGA.AO.A0JA	NA	8.0014	11.3326	11.3434	7.5112	14.8442	10.9571	2.3886	7.7455	10.5192	0	9.49	10.3192	11.3715	4.6819	9.4002	10.7104	7.2355	7.0785	8.9796	9.206	11.971	11.3665	10.176	11.5899	10.2052	655	0
TCGA.AO.A12B	NA	8.8816	12.6393	9.2222	12.3785	15.4029	10.8989	14.1784	7.0864	11.3532	0	8.9362	10.483	6.343	7.2702	10.0341	9.8057	6.6994	6.8424	6.4887	9.7698	11.1008	11.4173	10.4995	10.7496	9.7816	2989	0
TCGA.C8.A274	LumB	8.2836	11.6943	9.4425	4.4561	14.3555	11.2752	3.1733	7.6803	10.3112	0.8717	9.9266	10.0984	8.4894	6.0568	9.1469	11.0157	6.8098	6.9487	10.0623	9.1797	12.8414	11.5061	10.2298	11.4643	10.8505	508	0
TCGA.AC.A7VC	NA	5.4824	13.5924	12.2813	3.6894	14.932	11.8193	0	6.3047	11.9173	2.5838	11.9042	11.1988	12.3515	8.3584	8.8413	9.3981	7.1058	8.428	2.2468	9.3928	12.9541	11.2429	10.7244	10.6477	9.9191	NA	NA
TCGA.A7.A6VY	NA	6.2556	12.9901	11.5328	8.7846	15.3808	11.6468	2.3648	9.1354	11.0354	2.5466	12.1426	10.4901	10.2982	7.3201	11.0107	9.4726	7.0188	8.1175	8.904	10.2725	13.1098	11.96	10.5063	10.9292	10.7532	266	0
TCGA.A7.A3J0	LumA	6.9799	12.1998	12.0541	5.2059	14.8987	11.8685	12.2876	8.1885	11.3944	2.3593	9.6854	9.7185	6.9509	6.9481	9.9238	10.9101	6.8695	7.3432	3.7435	9.5856	11.7133	11.2243	9.6408	10.9563	10.5409	313	0
TCGA.D8.A3Z5	LumA	7.3885	12.1619	11.3344	8.3874	14.1881	11.7617	2.438	6.831	11.1286	1.2385	9.3805	10.7038	10.2069	6.2433	8.7863	10.206	8.0504	8.3842	12.736	9.1349	11.5315	11.5133	9.5438	10.353	10.0121	1015	0
TCGA.A8.A06N	LumB	7.9536	11.5279	6.8717	3.7397	15.5575	11.7884	6.8575	6.5815	10.2706	0	10.5234	9.8999	1.9568	7.4211	10.3887	11.0724	7.3159	7.4676	6.7843	9.2445	12.1676	11.213	9.4445	11.2454	11.717	NA	NA
TCGA.AR.A0U2	LumB	7.2973	11.6497	11.2055	5.4865	15.1828	11.6111	5.1962	7.6622	9.7502	0.3897	11.1386	10.2563	8.8893	7.0006	9.1439	11.0305	6.9531	7.5135	10.2604	10.2567	12.0156	11.7449	8.9755	11.7927	12.7722	2551	1
TCGA.E9.A1N8	Basal	4.1243	12.8522	13.6977	8.1169	15.2561	11.6507	4.5574	7.4022	10.1988	2.8291	12.2896	10.8861	11.1568	6.9864	9.0001	10.034	8.1414	7.5968	8.9975	10.5112	12.3905	12.0955	10.1679	11.2416	11.6112	1039	0
TCGA.AO.A12D	NA	7.494	12.7529	12.0842	5.8846	15.3571	10.9794	0	8.1647	10.0521	0	9.6709	10.4879	10.7028	5.0197	9.9181	10.7259	6.2474	6.8199	10.4358	9.8648	12.6617	11.2416	9.2376	11.2317	10.7833	2515	0
TCGA.A2.A4S0	LumA	7.7228	12.0201	11.0736	7.8488	15.0721	11.8507	13.6102	7.3738	10.9906	5.0595	9.1394	10.1886	6.6002	6.103	8.5709	10.8053	6.881	7.3738	2.7525	9.6556	11.4358	10.8406	9.2816	10.8439	10.6307	706	0
TCGA.BH.A6R8	NA	9.4216	11.9741	7.9977	3.7879	14.9442	11.1519	5.4634	9.2475	11.0946	0.757	9.6549	11.7037	8.0206	6.6789	10.9088	10.77	7.0188	8.1439	8.2342	9.6819	12.5468	12.3035	10.54	10.705	10.0998	293	0
TCGA.EW.A1PE	LumA	8.9156	12.243	10.9484	10.7186	14.1795	11.0799	4.2328	8.301	10.546	0.71	9.476	10.4503	9.6898	6.2641	11.7419	11.154	6.9056	7.0231	11.552	9.2491	12.1585	11.1055	9.9003	11.0879	10.8246	320	0
TCGA.GM.A2DF	Basal	6.3633	13.6346	11.3201	7.3192	15.672	10.9977	1.3254	9.7548	11.1045	0	10.1064	10.875	10.4709	7.8093	10.9494	8.8653	6.4066	7.2772	11.4365	10.0337	12.1705	11.6627	11.6242	10.5832	10.579	2155	0
TCGA.E9.A1QZ	LumA	8.4801	11.9724	10.6281	9.0366	15.0772	9.9342	2.4744	8.7593	9.6935	1.1475	10.4042	10.3383	10.9137	7.77	10.6259	11.0639	6.897	7.18	8.9362	9.5453	12.1464	11.97	10.5508	11.4883	10.8628	755	0
TCGA.AO.A129	NA	5.9362	12.8376	11.5008	7.3444	16.0743	11.0836	1.7297	8.102	11.6094	2.8435	10.8425	10.4825	10.3304	7.0095	9.7541	9.4604	7.5145	7.724	9.8954	10.3586	12.2541	11.0501	11.2568	11.1904	10.7	3286	0
TCGA.E2.A154	LumA	8.6189	11.6355	10.4343	5.4905	14.7614	10.7433	6.515	7.6061	10.4087	0	10.8322	10.4317	9.3116	6.4808	9.0221	11.2802	7.5953	7.2768	9.3826	9.646	11.8072	11.4795	10.3745	11.4403	10.0709	591	0
TCGA.AR.A2LE	NA	7.895	12.0971	12.9532	6.7308	14.9107	11.3052	1.3202	6.9397	10.6383	0.584	8.7301	9.9499	9.2628	5.5755	9.4627	11.3269	7.5697	7.0195	12.7749	9.8543	12.987	10.8805	9.398	11.5663	10.3503	5062	0
TCGA.BH.A0BR	LumA	6.1313	13.4914	12.0885	6.1158	15.1593	12.2615	2.2818	8.3058	10.2485	0.8941	9.1894	10.4962	11.5387	6.1086	9.2868	10.8883	6.6521	6.8313	8.5648	9.5506	12.6596	11.3685	10.1887	10.8434	10.5779	2330	0
TCGA.E2.A1B4	LumA	9.0237	12.3549	9.3002	5.9724	14.0365	10.4254	0	6.7018	11.1645	0.6123	7.7597	10.2592	8.8308	6.562	8.2726	10.0437	7.2323	7.8665	4.8325	9.3496	11.5297	11.3882	10.3948	10.7042	9.5239	1004	1
TCGA.C8.A1HF	Her2	7.7391	12.4447	11.901	4.7549	15.4899	10.7352	1.877	8.0915	10.618	0.9191	11.2923	10.1267	10.2895	7.6482	10.3487	10.0206	6.4839	6.9709	3.173	10.4608	13.4445	12.4181	10.2721	11.4182	11.5023	332	0
TCGA.E9.A1N3	LumA	8.2664	12.1327	9.2434	9.8987	15.7768	11.1035	10.3334	7.9728	10.5292	3.6187	9.4496	10.1232	8.2312	6.8256	8.3598	11.7849	7.0433	7.2711	4.7219	10.1392	11.9129	11.4213	10.1628	11.6817	10.9345	1059	0
TCGA.EW.A1PG	NA	7.0316	12.0742	13.2727	9.517	15.1562	10.3793	2.9316	6.1076	10.2294	0	8.252	9.8347	10.6567	4.4104	10.3661	10.8141	6.6343	7.4005	7.6271	10.684	12.4603	10.6572	10.2968	11.3063	11.1443	1051	0
TCGA.E2.A2P5	LumA	8.4355	12.2784	9.5771	5.9672	15.4472	11.2635	2.2363	6.4387	11.6229	0.4554	10.4994	10.8677	8.8934	6.6642	8.3163	11.2041	6.7635	7.9337	3.3618	10.8521	13.232	11.4565	10.5141	11.3431	10.2509	821	1
TCGA.A2.A4S1	NA	4.5312	12.5969	13.2168	6.5971	14.7927	11.904	0	9.1789	11.4544	0.8881	9.4237	10.3828	12.0641	6.6234	9.856	9.7868	7.1271	7.9773	3.2492	9.3728	12.1024	11.1518	10.4387	10.3318	10.2266	820	0
TCGA.AC.A3TM	LumA	9.1648	12.5385	9.8936	4.9026	14.2885	10.9924	8.1489	8.0511	12.4856	0	10.3152	10.1755	9.0236	7.7558	8.2832	9.3835	6.8953	8.3689	9.7072	9.2788	12.3974	12.3211	10.8481	10.5006	8.6765	762	0
TCGA.E9.A1RH	Her2	9.3158	11.7711	14.3481	5.5796	15.0362	9.919	0.3975	6.9697	10.2709	0.3975	9.1859	10.0435	10.7443	6.8139	9.3107	10.811	6.3831	6.8986	8.2047	10.3374	12.7399	11.9065	10.2142	12.9674	11.3517	1417	0
TCGA.B6.A402	NA	5.7971	12.4037	12.1135	3.569	15.2876	10.9532	1.1522	8.2944	10.9074	0.4931	10.6406	10.9242	8.5574	8.2937	10.1235	9.0987	7.7749	7.843	10.3677	10.532	11.9426	11.9119	10.9482	11.4147	10.6563	2281	0
TCGA.A2.A3Y0	Basal	5.9635	12.8585	10.6113	3.8381	16.3092	10.638	3.7169	8.7377	11.7757	4.5028	11.7391	10.9108	8.2655	7.4599	9.8972	10.0794	6.6367	8.3476	9.1934	10.5579	13.2388	11.6281	11.3932	11.1796	9.8507	1546	0
TCGA.D8.A1XR	LumB	9.0822	11.6556	10.3458	5.8915	14.6322	11.3159	3.248	7.0662	10.3629	0.585	8.8107	9.9422	8.9201	6.9763	8.3016	11.5238	7.2835	7.4677	11.8283	9.0204	11.5543	11.2628	10.0769	11.5289	8.5576	482	0
TCGA.A7.A26G	Basal	5.6984	13.5447	12.7618	7.9611	14.9751	10.7563	1.5443	7.7635	9.7735	2.6951	9.4523	10.1928	11.6423	5.1814	11.0244	10.4194	6.5348	6.3963	4.4286	10.3727	12.0913	11.3565	9.1774	12.5963	11.4323	722	0
TCGA.B6.A0IM	LumA	6.4638	11.6491	11.5108	5.791	14.973	11.4477	6.4419	8.4678	10.422	1.2205	10.6101	10.1571	10.0531	7.5167	9.5994	11.2914	6.7436	8.2329	5.1853	10.2512	12.5964	10.8797	10.3955	10.8246	10.4799	3873	1
TCGA.E2.A107	LumA	8.6307	11.9866	8.8889	6.228	14.5964	11.5288	0.994	8.8315	11.2638	0	11.0806	9.862	8.1329	8.2291	8.7965	10.4536	7.304	7.9596	10.2197	8.9335	12.4744	12.259	10.3051	10.6873	10.734	1047	0
TCGA.BH.A1FD	NA	7.2434	12.254	10.2385	5.3349	16.0658	11.3967	2.9393	8.4364	10.4226	0	10.4629	10.0306	10.4559	6.3153	10.0117	11.3054	6.1238	7.5417	5.1384	10.4555	12.8832	11.4177	10.4914	12.0171	12.0284	1009	1
TCGA.A2.A0YF	LumA	8.6902	11.7196	10.011	6.21	15.2381	11.4447	4.9675	8.0775	9.6393	0.3399	10.0046	10.2466	8.5794	5.5501	9.9809	11.2078	6.4574	7.4752	12.9724	10.0642	12.0916	11.5359	10.2935	11.7133	11.3589	1535	0
TCGA.BH.A0E1	LumA	8.6584	12.4168	10.2984	6.3859	14.8222	11.3356	0.8415	7.254	10.8823	0	10.2196	10.2018	10.064	6.4941	9.2078	11.0322	6.3324	7.2427	11.0445	10.0079	12.2544	11.5504	10.3177	11.3074	9.8804	477	0
TCGA.V7.A7HQ	NA	10.5394	12.4619	8.7365	3.9772	15.0071	11.1413	4.572	8.2854	12.3113	1.1581	9.9002	10.6391	8.7668	8.0586	7.3264	8.9969	6.1414	8.8717	6.9845	9.0797	12.3889	11.8465	10.7547	10.5292	8.8429	2033	0
TCGA.C8.A27A	LumB	8.1918	11.9204	10.8549	5.1235	14.5829	10.9496	8.833	8.6376	9.3959	0.8184	10.9767	10.5015	7.5987	8.3312	11.4652	10.9935	5.9678	7.6292	10.4234	10.923	12.1535	11.9663	10.4086	12.0827	11.4733	747	0
TCGA.B6.A0RO	LumA	9.8994	12.2985	9.1059	8.6879	15.3437	11.2224	0.6764	7.2339	10.3385	0.6764	9.3861	9.6321	8.9179	4.7402	8.8504	10.4166	6.455	7.2679	11.3211	10.3291	12.7927	12.5052	10.1217	11.2813	11.0141	4929	0
TCGA.B6.A0WT	LumA	8.9425	11.9798	12.3062	6.3552	14.6913	10.6168	8.1953	6.8106	10.1985	0	10.2494	10.5182	10.4151	6.9637	8.5272	11.1458	7.2831	7.3561	7.3116	9.8093	11.8151	10.8065	9.9162	11.5219	9.4945	5739	0
TCGA.BH.A0DV	LumA	7.9013	12.116	11.9367	8.4339	14.5647	10.654	1.7574	7.1862	10.5015	0	8.9949	10.1543	11.712	5.3989	9.6732	10.3753	6.2193	6.7041	9.6552	9.3912	11.7979	11.1843	9.7525	10.7421	10.4761	2064	0
TCGA.A2.A0CM	Basal	5.3302	12.6544	13.0977	5.8377	15.8675	10.4629	2.7089	7.9644	10.2955	1.2537	11.3163	10.1935	10.1252	6.9677	11.4326	10.2591	6.5004	7.975	10.9034	11.0257	13.1565	11.4137	10.6125	11.657	11.8361	754	1
TCGA.5L.AAT1	NA	8.1237	12.284	11.271	6.196	13.9197	11.5291	3.0592	9.1503	11.3178	0	9.0782	10.305	10.0771	6.3065	9.8058	9.4635	6.8969	8.1363	9.6995	9.0826	12.2085	11.4076	10.5076	10.4823	10.2529	1471	0
TCGA.AR.A24R	LumB	8.7877	12.1746	10.147	6.4623	14.4932	10.5169	3.5095	8.5198	9.9244	1.4006	10.4651	9.9106	10.2942	6.6395	10.6517	11.3296	7.288	7.2234	5.8339	9.749	12.5237	13.3634	10.0015	11.0276	10.6878	3430	0
TCGA.E2.A14T	LumA	8.1446	12.2382	9.5387	5.7733	16.0219	10.9529	6.8045	8.4386	10.8141	0	10.0113	9.957	9.098	7.9401	8.0807	11.4654	6.369	7.4003	11.6827	10.2987	12.1449	12.7953	10.0948	11.6682	10.9541	2311	0
TCGA.A2.A3XT	Basal	6.0578	12.2948	11.5311	5.7197	14.8961	11.7554	2.5291	8.8115	11.8092	4.8745	11.6327	9.5717	9.6225	6.355	10.0737	9.584	7.0273	8.5758	5.4079	9.6889	13.4186	11.9672	10.5133	11.2772	11.2536	2770	0
TCGA.LD.A66U	NA	8.7107	11.9986	9.4401	6.7209	14.7094	11.6091	8.5178	8.8716	12.0393	0.8066	9.7447	10.5149	9.7835	7.1602	8.8531	10.0445	7.7116	8.2009	8.6965	9.3428	12.1537	11.6557	10.375	10.5185	9.5787	646	0
TCGA.BH.A0EE	Her2	8.9689	13.0433	11.9988	4.4832	14.5047	11.1316	1.4188	6.5138	10.7486	0	11.2528	10.0599	6.1686	6.8741	11.7119	10.2646	5.4977	7.9985	12.4672	10.8635	13.7777	13.5285	11.0247	11.1759	11.126	943	0
TCGA.E9.A1R6	LumA	8.2454	11.7056	10.8855	4.9675	15.5192	11.6125	1.4979	8.8119	10.9479	0.7905	10.7125	9.7314	8.801	7.6981	8.9809	11.355	7.3028	7.4989	7.6135	8.1262	11.9297	11.4046	9.2017	11.1479	11.1596	339	0
TCGA.A2.A04N	LumA	9.6028	12.1733	11.3166	6.303	15.139	10.7612	3.9689	7.7478	10.7944	0.4815	9.4246	10.443	10.1082	6.321	8.4709	10.6641	7.0717	7.9346	6.1033	9.7056	11.7901	11.4406	10.2037	10.9659	10.0887	4354	0
TCGA.OL.A66K	LumA	7.4922	11.634	9.5167	8.0138	14.8266	11.0559	9.92	7.3783	10.9628	0.871	9.5094	10.1013	9.7396	6.7587	8.0499	10.7824	7.0799	7.3819	8.9954	10.0898	11.3448	11.4212	9.9644	10.7174	9.3888	1275	1
TCGA.A8.A08O	LumA	8.0773	11.429	12.089	6.6046	14.9897	11.1978	6.071	6.597	9.7248	1.1697	9.6903	10.3013	11.1423	6.6553	9.1131	11.3698	7.3818	7.3192	5.1861	9.9315	11.8012	11.7343	10.2155	11.3215	10.6387	943	0
TCGA.BH.A1FE	LumA	8.0304	12.1731	12.3237	7.8272	15.271	10.7998	4.3308	7.3211	9.705	1.8849	10.3467	10.1816	11.6696	6.2721	10.4846	11.0074	7.1647	6.8139	4.512	9.8135	12.2795	11.3325	9.8293	11.6396	10.7475	2273	1
TCGA.EW.A1PD	LumA	7.3491	11.805	12.2238	7.0399	14.9169	11.2897	4.0172	8.1267	11.1394	1.5972	10.7939	9.8501	10.7625	8.3376	9.2913	10.8591	6.5553	6.7596	9.5881	9.5379	13.0474	12.1652	9.7112	11.0911	11.2823	424	0
TCGA.B6.A0X1	Basal	6.6738	11.925	12.7485	7.0163	15.5958	12.0236	1.8944	9.6242	10.4378	3.6958	10.3528	10.3748	7.822	7.5404	10.3145	10.9398	7.822	6.8059	6.2686	10.1627	12.5204	11.6443	11.4347	12.0554	13.4318	7455	1
TCGA.A8.A09C	LumB	8.8046	11.8956	10.2904	6.0511	15.3967	11.1658	4.832	6.5894	10.2822	0.4403	10.0999	10.365	9.224	6.2031	8.0349	11.0797	7.9562	7.4673	9.7187	10.3286	11.927	12.2414	10.3489	11.5033	11.7908	31	0
TCGA.A7.A0CD	LumA	8.5487	11.5466	11.3908	5.8354	15.3236	10.7846	3.7864	7.3718	10.6677	1.1134	10.9109	9.9706	8.7862	7.1061	10.4216	11.5019	7.0653	7.5769	9.6837	10.1673	11.9068	11.0076	9.3305	11.639	11.1065	1165	0
TCGA.BH.A0E0	Basal	6.8975	12.8247	10.9408	3.8608	15.575	10.4349	6.5675	9.2905	10.887	1.1498	10.9792	11.3184	7.5595	6.3623	7.9352	10.2233	6.5596	7.731	11.7486	10.5074	13.3682	11.7734	11.709	11.7792	10.8786	134	0
TCGA.A8.A07W	LumB	7.87	12.4244	11.0449	5.0278	15.8912	11.3507	6.4184	8.6306	10.4742	0.7098	11.6477	9.7498	9.2736	8.0168	9.1431	11.0675	6.7604	7.3123	8.4165	9.7251	12.5743	11.7865	9.9964	11.6119	11.891	304	0
TCGA.GM.A2DC	LumA	8.1629	12.1152	10.1006	5.3957	15.4723	10.6121	1.4013	9.464	10.214	0	8.759	9.4093	7.7904	7.4129	8.2169	10.9952	7.1005	8.1629	4.2521	10.3246	11.3265	11.8716	10.3878	11.208	10.3405	2535	0
TCGA.E2.A15F	LumA	7.6889	12.6868	11.7348	8.6237	14.7495	11.0102	2.9561	9.4639	10.4061	5.9307	10.1302	9.6461	9.1767	7.1088	10.3683	11.4819	7.4964	7.6037	5.0307	9.8268	11.7527	11.4619	9.6537	11.5579	10.3304	658	0
TCGA.GM.A2DL	LumA	7.3662	12.4062	11.4801	6.9906	14.8011	11.2552	0.557	7.9755	11.2854	1.5285	10.4208	9.9306	11.0884	6.9274	9.3913	10.0819	6.8281	7.4424	6.6088	8.8919	12.3033	10.8989	10.8236	11.1767	10.872	3519	0
TCGA.EW.A1OZ	LumB	8.4625	11.309	11.613	4.8965	15.5425	10.6859	1.2506	7.1572	11.3148	0	11.9534	10.5726	10.2027	6.5893	9.2113	10.601	6.9024	7.6536	7.6312	9.3977	12.8779	12.6426	10.4812	11.4804	10.3825	1229	0
TCGA.AQ.A7U7	NA	7.3033	12.0566	11.0658	7.3349	14.679	11.5446	9.6427	9.2011	10.7841	2.0438	9.6434	11.1029	10.594	6.4089	10.951	10.4251	7.5901	7.7347	9.8121	9.2901	11.392	10.7334	9.7035	10.641	10.3831	584	1
TCGA.A2.A3XU	Basal	5.4013	11.9485	9.513	4.6518	15.936	10.8204	0.8428	7.423	12.4781	0	11.7108	9.2806	12.133	8.2959	8.6271	10.4707	6.1218	8.2353	5.1505	10.3517	13.2835	11.5735	11.4169	11.5765	11.1908	912	1
TCGA.BH.A0WA	Basal	6.2721	13.0945	13.9407	9.3513	15.7082	10.7624	0.7521	7.6543	9.902	1.61	13.0082	10.8673	10.3374	7.0903	10.5576	10.2829	6.4576	6.948	10.273	10.9651	12.3961	11.2943	10.1128	10.8593	11.3701	701	0
TCGA.E2.A576	NA	8.8361	11.4831	6.9033	5.6942	15.2991	11.6091	9.5741	8.0964	12.6657	0.5443	10.25	10.1401	8.1516	8.6955	8.1156	9.8243	7.0373	8.3865	8.8433	10.2281	12.8548	11.7209	10.9665	10.6749	9.4176	1043	0
TCGA.AN.A04D	Basal	5.9817	12.5698	12.0896	4.698	15.1097	11.4109	5.5479	7.2952	10.7441	1.9558	12.2101	10.2667	7.611	8.6036	8.8784	10.1347	6.1195	7.0382	0.6562	10.1026	12.5342	12.6005	10.8437	11.9692	11.487	52	0
TCGA.D8.A27H	Basal	7.5646	12.6865	14.1806	10.1684	14.7294	11.8276	0.7526	7.7061	11.5052	0.4248	10.395	10.0688	11.5002	5.9832	11.6687	9.59	6.5825	6.6821	12.4155	9.5163	11.6159	11.2915	9.8101	10.9998	11.6432	397	0
TCGA.A2.A0CW	LumB	7.3597	12.2678	8.8291	3.7486	15.5982	12.3245	1.1041	8.4824	10.247	1.4459	11.1897	10.9613	7.9771	6.4955	10.6699	11.2218	6.4841	7.6326	9.3857	10.0697	11.7566	12.1729	10.9475	10.3728	11.443	3283	0
TCGA.E9.A1ND	Basal	6.5691	12.3015	12.4177	7.0126	15.0752	11.0834	2.3214	8.8034	11.6314	0.5847	9.8131	10.8669	10.4055	5.89	11.9298	10.142	6.7806	7.5307	11.7276	9.5973	12.9463	11.4971	10.7608	11.4763	11.6715	1266	0
TCGA.AQ.A04J	Basal	5.0328	11.9979	13.1559	8.473	15.3163	10.5494	1.8233	8.008	9.7291	1.8233	11.8379	11.0191	10.6405	6.5832	9.9405	10.0386	6.9668	7.4107	9.4934	10.3042	12.4999	12.2318	10.5126	11.1123	10.359	819	0
TCGA.AR.A1AJ	Basal	5.7442	12.1987	12.6093	7.6174	15.3345	10.7877	2.9212	9.3469	10.183	0	11.3316	10.4799	11.204	5.8521	11.5916	10.5973	6.6124	7.194	6.4534	10.5051	12.6539	11.2177	10.628	11.4766	11.0441	3072	0
TCGA.AR.A24N	LumB	8.3206	11.9205	11.9193	8.3887	15.3886	10.6108	0	8.0561	9.94	0.3704	10.4042	9.8691	10.2182	6.5837	10.1881	11.7784	7.189	7.1234	8.9211	10.2985	11.7817	11.2116	9.9434	11.3866	11.2753	3035	0
TCGA.E2.A1LS	Basal	5.7019	13.1529	12.9178	7.7426	14.9214	10.4408	0.5854	6.9556	9.9787	2.171	9.2517	10.4501	9.0047	4.6004	9.7934	9.7268	7.7361	7.5599	8.2303	10.329	11.7066	11.3206	11.898	11.8197	11.6496	1604	0
TCGA.EW.A1J2	LumA	8.0034	11.9111	12.3621	8.4667	14.1382	10.8764	1.3257	7.8343	10.216	0.5871	8.8758	10.3961	11.1959	5.4615	9.7728	11.0527	6.851	7.4071	6.6644	9.3583	11.4243	11.223	9.6835	10.9142	10.6573	403	0
TCGA.B6.A0I6	Basal	6.5953	12.5552	13.4961	8.9374	13.9783	11.6612	0.546	6.389	11.2503	0.9412	12.4558	10.1039	9.9562	7.1868	9.7763	9.9891	7.7042	7.2337	5.2922	10.4559	12.9854	11.873	9.6273	11.1633	11.2069	991	1
TCGA.S3.AA17	NA	7.3884	12.2328	9.889	5.8145	15.1117	11.9434	1.8489	9.0584	11.4448	1.8489	10.2497	10.6427	9.7324	6.8648	10.9585	10.4585	7.1045	7.063	6.0737	9.3912	12.1875	11.98	9.6928	11.0912	10.2681	424	0
TCGA.A2.A0YG	LumB	7.5295	12.4221	9.8431	5.6892	15.7034	11.8288	6.3926	7.3173	9.8822	0.4094	11.3393	10.3135	9.2474	5.5423	9.1075	11.7542	6.8355	6.9962	11.5183	9.7538	12.961	10.8335	10.5316	11.9053	11.4003	666	0
TCGA.A8.A08F	LumB	7.4742	12.3724	10.6549	5.3948	14.7288	11.8734	8.1587	8.9209	10.6715	1.433	11.1516	10.4307	9.6403	7.5788	9.6122	9.6796	6.1086	7.7121	9.2079	9.4998	12.5472	12.5311	10.4061	11.478	10.9867	1004	0
TCGA.A7.A0D9	LumA	7.8526	12.4465	11.8462	5.8263	15.6746	11.3915	6.3078	9.0205	10.4211	1.6128	8.8725	10.6357	9.3764	6.0087	7.8423	11.2453	7.449	6.6291	7.4524	9.7732	12.2867	11.6728	10.682	11.424	10.6827	1139	0
TCGA.BH.A1F0	Basal	6.0574	11.9249	12.3201	9.1597	14.8393	10.7832	2.5721	9.2391	9.8048	0.8955	9.7058	10.3235	11.6196	7.2595	11.578	9.8805	6.5198	7.1397	3.6814	10.2847	11.994	10.4859	10.6223	11.7237	11.3393	785	1
TCGA.AO.A0JC	NA	7.2148	11.8923	9.636	7.7393	13.9305	10.963	5.2395	9.6136	10.8776	3.2201	9.5619	11.2431	9.8907	6.1485	10.1429	10.1656	7.6642	7.7341	9.1114	9.7621	12.4678	11.046	10.1186	10.6399	10.9262	1547	0
TCGA.AR.A24U	NA	8.3737	12.0406	12.7467	8.0527	15.255	10.5529	1.73	8.1381	10.2964	0.7329	9.9296	9.808	11.32	5.1558	10.0174	10.7151	6.6339	7.8376	11.8446	10.1632	12.2553	10.507	10.0849	11.6628	11.9205	3128	0
TCGA.A7.A26F	Basal	6.0365	11.9939	13.4465	5.8145	14.2487	10.887	1.1326	8.5489	9.885	1.9495	9.4381	10.6599	11.5198	6.1761	10.8727	11.6488	6.1328	6.3634	10.6093	9.8537	12.0001	11.0223	10.4153	11.279	12.0444	738	0
TCGA.BH.A0E9	LumA	7.215	11.5311	11.4709	8.8274	14.6587	11.1231	4.4747	8.0935	10.6228	1.4696	9.7283	10.1523	11.3969	5.8236	9.2444	10.7988	7.3526	7.2854	9.9107	9.5592	12.3508	10.9851	9.8288	11.48	9.7826	2489	0
TCGA.A2.A0YL	LumA	7.8951	12.0242	12.911	8.4686	14.6769	10.805	1.547	7.4133	10.6115	1.1899	9.966	10.1411	11.8841	5.7237	9.8063	10.9433	7.3238	7.4401	8.1343	9.3627	12.3351	10.5826	10.0002	11.1205	10.238	1474	0
TCGA.D8.A1JT	LumB	9.2435	11.8046	9.9957	4.6524	15.0125	10.6475	8.8254	8.1295	9.3052	1.3156	9.1886	10.024	7.8284	5.2407	11.2962	11.5645	6.5624	6.2712	10.7252	10.7292	11.8548	11.3241	10.0302	11.8991	12.1813	405	0
TCGA.OL.A5RY	NA	6.2368	12.6111	11.6206	8.4183	14.6004	11.6197	3.3469	8.5472	11.5016	2.0208	10.3923	10.353	10.8814	5.712	10.7432	9.4402	6.5272	7.714	10.4065	9.5064	12.5594	11.5721	10.0458	10.7398	10.8728	752	0
TCGA.E2.A105	LumA	8.3656	12.0024	8.9006	5.6338	15.2436	10.7114	9.2722	8.7488	11.1419	0.7146	10.4433	10.2427	8.277	8.5164	8.7796	10.865	6.7852	7.7403	6.539	9.8169	12.0272	12.7128	10.3847	11.3199	9.9425	1308	0
TCGA.AN.A0FX	Basal	6.3296	12.4386	13.5972	10.2844	15.5319	10.3356	2.4504	7.5807	11.418	1.1864	12.2712	9.502	10.0505	6.8249	10.1444	10.3646	6.5954	7.5092	11.0918	9.6668	11.8589	11.2146	10.126	11.7782	10.8729	NA	NA
TCGA.B6.A409	NA	6.7654	12.5557	12.5906	6.324	15.9006	10.8987	1.3728	7.9415	11.729	0.9664	10.0453	10.4341	9.4326	6.9218	9.9035	9.3336	5.6337	8.5771	11.3787	10.1917	12.5563	11.4661	11.2281	10.5984	10.0274	573	1
TCGA.A2.A0CQ	LumA	9.0347	12.31	8.805	6.7382	13.7475	10.594	8.8802	8.0345	10.8249	1.051	8.9765	9.8572	7.3983	6.5421	9.3054	9.9979	7.41	7.7839	7.6695	9.9581	11.4299	11.5315	11.0409	10.6731	9.6794	2695	0
TCGA.AR.A0TV	LumB	8.1088	12.8756	8.2281	4.4109	16.1066	10.4063	4.7304	9.1531	11.0562	0.7654	10.9112	10.4383	8.8912	7.8762	9.739	8.7934	7.6498	7.6722	10.5819	10.0715	11.7405	11.3084	9.8871	11.8332	12.525	2288	0
TCGA.E2.A106	LumA	8.7194	12.4503	10.4772	4.396	16.2173	11.0783	1.9625	6.8145	10.0385	2.4185	9.5933	10.6331	8.1617	6.6508	7.4854	11.2404	6.5221	8.2725	13.0238	9.7115	11.9136	12.0959	9.8543	10.8928	10.0753	2541	0
TCGA.AC.A2BK	Basal	5.8239	12.4124	12.4575	8.7576	15.9848	10.892	0.4003	5.8561	9.891	4.289	11.8104	11.2618	11.9951	7.9853	10.0891	8.7848	6.2926	7.4693	0.7133	11.8327	12.8721	11.6975	10.1118	10.9449	11.6417	2222	0
TCGA.A8.A084	LumB	7.8524	12.0618	10.4562	7.4204	14.3957	11.1839	1.3487	6.4597	10.4135	0.4717	10.5399	10.243	9.719	5.9484	11.5407	10.5507	6.491	7.1901	11.3224	9.4886	12.9347	11.6052	10.4338	11.4761	9.9895	458	0
TCGA.BH.A0B6	LumA	7.7122	13.035	9.6134	6.6119	14.9651	11.6159	3.6471	9.0555	11.339	0	9.9473	10.3109	9.7719	5.1314	10.5671	9.6532	5.8932	7.6621	9.5575	9.1744	13.0361	11.7894	9.7227	10.8388	10.9231	2483	0
TCGA.OL.A66H	LumA	8.3107	12.438	8.6061	5.8809	15.3518	11.4258	0.5028	9.1722	11.4076	1.1706	9.7732	9.758	8.797	6.6142	10.9173	10.8264	6.5416	7.6159	13.3853	10.004	12.4831	11.548	10.7305	10.9398	10.6282	812	0
TCGA.B6.A0RM	NA	8.6657	11.8852	8.1948	3.9619	15.5566	11.0516	1.6268	6.0538	10.8121	1.4543	10.5601	10.0328	8.9655	7.5178	8.6633	10.7219	6.9886	7.6318	3.329	9.6732	11.727	11.275	9.8803	10.9182	11.2278	2373	1
TCGA.E9.A22A	LumB	8.1552	12.0978	11.4939	7.2365	15.3626	10.8802	2.1826	8.4608	10.8177	0.9146	10.2515	10.2028	11.4302	6.5102	10.7324	10.0583	5.6041	8.1112	9.2098	9.9258	12.0048	12.3698	10.9773	11.6222	11.5166	1189	0
TCGA.A8.A08C	LumA	7.6809	11.6222	11.0615	11.0415	15.2336	10.2171	0	6.4874	10.2938	0.4207	9.4021	10.6684	9.0863	5.7624	9.367	11.4926	7.0652	7.6951	1.4293	10.7244	11.0877	11.6686	10.2395	11.9934	10.5567	881	0
TCGA.E2.A1IO	LumA	7.9774	12.4136	11.7482	7.2805	14.4316	11.2551	7.9452	7.4381	10.7268	1.0788	9.9884	9.9768	12.08	6.2991	9.4013	10.3839	7.1525	7.091	2.5411	9.2203	11.9671	10.9028	9.3391	10.922	10.2594	1855	0
TCGA.A7.A13E	Basal	3.4359	12.7653	13.8713	8.6568	15.0932	10.7732	4.5364	8.1804	10.6301	0	10.4945	10.7394	9.152	6.5793	9.4861	10.4595	7.7504	8.0586	12.1355	11.0272	11.8134	11.6211	10.3117	10.9154	10.6329	614	1
TCGA.D8.A1JP	LumA	7.1023	11.7803	11.0185	6.5058	15.001	10.9304	4.8747	8.2437	10.9882	1.5466	12.0704	9.8155	10.516	7.1091	9.9265	9.9568	6.9704	7.237	6.9593	10.2384	13.3896	11.0272	10.0931	11.0479	11.0542	639	0
TCGA.AR.A0TX	Her2	6.5607	12.4365	12.6266	6.8109	14.6561	11.6614	3.1893	8.1337	10.7677	0.7457	10.0019	10.2373	10.8144	5.8084	8.6254	10.748	6.5607	6.6846	8.1799	9.0923	12.6915	12.0041	9.7245	11.1844	11.3923	1972	0
TCGA.AN.A03Y	NA	7.5004	12.0512	8.9764	4.7067	15.6257	10.8177	10.4728	7.276	11.3084	0.7778	10.6478	10.5026	8.9852	7.1708	9.4494	11.2896	6.8629	7.5779	1.6524	10.7363	12.9304	10.9476	10.6727	11.7326	10.9092	NA	NA
TCGA.BH.A0C3	LumB	8.6235	12.4341	11.9716	9.9485	14.764	11.7413	1.1821	8.35	10.3519	0	10.0287	9.998	11.3985	6.8144	9.8831	11.0443	6.4408	7.3376	7.45	9.5712	11.9709	12.0532	9.6294	11.3227	11.444	2709	0
TCGA.D8.A27E	LumA	8.0934	12.251	11.0501	11.1858	15.5069	11.1824	2.0592	7.5843	10.5192	0.3651	8.22	9.6257	8.6454	5.238	8.8509	11.2996	7.0504	7.4671	2.331	9.8493	12.069	11.398	9.8805	11.4513	10.8354	530	0
TCGA.AQ.A04L	LumA	7.9982	13.0768	10.0686	5.4115	13.9438	11.6943	0	6.756	11.7323	0	9.9232	9.214	9.7687	5.8213	8.5561	9.5692	5.9295	7.7071	7.4619	9.7745	12.8814	11.569	9.9674	12.183	10.1279	3957	0
TCGA.EW.A1J5	NA	8.8237	11.8379	10.1631	7.0889	14.4456	10.2071	0.8396	8.9519	10.0942	1.0375	10.0633	10.6295	9.7035	6.9437	11.1064	11.1115	7.352	7.4893	6.5929	9.4451	11.3969	11.7847	9.5617	11.2005	10.3425	477	0
TCGA.D8.A73U	NA	7.3585	11.9055	10.1614	7.0474	13.792	11.3478	7.7831	9.6621	11.0415	2.5567	9.1347	10.3131	10.6634	5.6781	9.5659	10.1858	7.3237	7.0851	11.2646	8.5936	12.1318	11.0663	9.6664	10.4952	10.7112	492	0
TCGA.E2.A1B5	LumA	8.2602	12.8098	10.29	7.8903	15.0288	10.1812	3.5966	8.2959	10.4148	1.648	8.6685	10.3182	10.31	5.9472	9.5467	10.8648	6.6685	7.6369	10.0221	9.7188	12.2754	13.3438	10.4246	11.6244	10.7483	984	0
TCGA.BH.A1FR	LumA	7.7109	12.1435	9.5297	9.6363	15.1302	11.4835	11.5543	8.1115	10.7799	1.3036	9.963	9.8014	7.9938	7.3179	8.7142	10.6926	6.6135	7.3746	1.5646	9.8611	11.9164	10.9409	9.9016	11.1702	10.7167	1642	1
TCGA.D8.A146	LumA	8.4769	11.904	11.759	7.8913	14.4015	11.1383	5.107	7.9504	10.2441	1.0482	9.1972	10.188	10.8155	5.4479	8.5972	10.5263	7.1459	7.2742	11.1574	9.1644	11.7749	11.1188	10.1501	11.0762	10.2933	643	0
TCGA.GM.A2DN	LumA	7.7064	12.5657	12.5683	6.9514	14.3781	10.722	3.9326	8.6049	10.6624	1.109	10.4781	10.5332	9.5474	6.5182	10.0856	10.6396	6.6893	7.6186	6.9409	9.6851	12.1593	11.7912	10.1384	11.0154	10.3377	3091	0
TCGA.E2.A574	Basal	6.6884	13.3826	10.1493	3.7359	15.8142	10.7339	0	8.0454	12.1536	3.1467	9.968	10.0235	9.2154	7.5616	8.4902	8.6955	7.4039	8.5626	12.6704	9.5467	12.8375	11.6934	11.5166	10.6617	9.152	1179	0
TCGA.A7.A4SE	Basal	5.4916	11.1852	11.7631	6.6859	15.3799	11.88	4.4283	8.3224	10.6778	1.1198	10.6258	10.9479	10.2558	6.9429	11.8823	9.2716	7.1534	7.6596	10.1631	10.5883	12.4404	10.7499	10.6322	11.1657	10.3907	644	0
TCGA.E9.A227	LumA	8.8314	12.5417	10.3015	7.3607	14.5179	10.7773	1.6761	7.754	10.3306	0	9.3575	9.9717	10.2862	6.6619	9.2389	10.7089	6.8038	7.5686	12.4672	9.9509	11.9812	11.8217	10.7211	10.8979	10.0681	975	0
TCGA.LL.A50Y	LumA	9.3167	12.4481	7.6672	3.7248	14.0385	11.2037	0	8.0027	11.6973	0	9.5511	10.248	7.8534	6.2027	8.2889	9.5944	6.5742	8.123	6.7878	9.2121	12.3011	11.6537	10.5551	10.3801	9.6735	762	0
TCGA.BH.A0B0	LumA	8.1867	12.7293	10.6586	7.349	14.0083	10.9245	2.9277	8.3344	10.9364	1.163	9.7874	9.8443	10.3644	5.4737	9.9885	10.4886	6.068	8.02	9.6195	9.3749	12.6655	10.9385	10.5039	10.7486	10.4371	2477	0
TCGA.E9.A2JT	LumA	6.4496	11.7829	10.0582	8.1881	14.1615	11.0546	4.6886	9.5113	10.8334	2.3921	10.1164	10.6414	10.4313	5.4295	9.8625	10.3959	7.2398	7.7521	9.0955	9.441	12.1937	11.0695	9.8603	10.707	10.5537	288	0
TCGA.BH.A42T	LumB	7.5673	12.2807	9.8347	5.2994	15.2345	12.3863	1.3749	8.8231	11.832	0.7114	11.2919	10.9558	8.7198	8.3422	9.7346	10.0081	6.8977	7.4799	4.6926	10.0085	12.8196	11.9531	9.509	10.7726	10.0893	320	1
TCGA.A1.A0SB	NA	4.5835	12.7851	15.2449	10.0631	14.7562	11.0004	0.5366	5.4228	11.0979	0.5366	10.221	10.134	12.3417	6.2423	8.5189	10.9056	7.3622	7.1635	1.8887	10.2602	12.4709	11.7407	9.9077	11.2197	10.5436	259	0
TCGA.E9.A1RB	LumB	7.1123	12.8997	11.169	8.8567	14.7397	11.0956	7.4102	7.3097	9.7556	2.6922	12.0397	9.7569	10.0977	7.2636	9.8017	10.2425	7.47	7.6901	4.1835	10.2332	13.6071	12.0114	10.8438	11.8614	10.815	976	1
TCGA.B6.A0WY	LumA	7.6469	12.4176	12.4053	8.6469	15.2373	11.6287	2.0707	7.9679	10.845	2.1767	9.6763	10.7202	10.2795	6.1598	11.1136	10.8364	6.3629	7.9418	10.4762	9.4024	12.4023	11.945	10.0064	11.5953	10.8412	3461	1
TCGA.A2.A1G1	Basal	6.6863	12.3702	13.0627	5.5937	15.3437	11.2341	3.9859	8.6651	9.751	1.7966	10.059	10.0049	10.0624	5.8128	10.278	10.8665	8.3761	6.5742	7.2984	10.4811	12.9305	11.25	10.4477	11.1008	11.304	584	0
TCGA.AR.A5QQ	NA	5.9908	13.0615	12.3593	6.2112	15.1026	10.719	2.5772	9.5289	11.7798	6.2576	11.5342	9.9737	9.8336	8.2672	10.77	10.2386	6.5981	8.1928	7.9391	9.05	13.0823	11.1565	11.1615	10.8889	10.5298	322	1
TCGA.B6.A0I2	Basal	5.674	12.1563	11.7427	5.9943	15.2561	12.1709	1.8897	8.3984	11.1435	6.0232	11.4927	10.8839	7.1129	6.5583	10.6741	9.6145	7.7004	7.9912	11.3304	10.3575	12.5108	11.2164	11.1657	11.4988	10.4034	4361	0
TCGA.AQ.A54N	Basal	6.116	12.5784	12.032	2.1895	14.5151	11.451	0	8.8784	11.5295	1.2432	10.6069	9.8059	11.4629	7.3434	9.4017	7.8498	8.4604	8.1039	7.2807	10.2181	11.8726	11.4048	11.1635	11.4981	10.3157	78	0
TCGA.BH.A0AY	LumA	8.7883	12.1132	10.6156	6.478	15.2463	11.0161	5.583	7.5199	10.5368	0	9.7994	10.2736	11.0686	6.6127	9.2275	10.1588	5.9707	7.3225	5.609	9.2969	12.8943	11.9649	10.2221	11.0604	10.9332	777	0
TCGA.S3.A6ZF	NA	8.4588	11.6128	10.1027	6.048	15.4276	12.2282	1.571	8.7261	10.236	2.4852	10.5854	10.3749	8.6917	7.497	10.0406	10.5971	7.6325	7.4816	8.5324	9.055	13.3899	11.197	10.13	11.3786	11.2436	572	0
TCGA.E2.A15H	LumA	9.6067	11.8633	10.8568	5.6423	15.5504	12.0456	0	7.5243	10.1673	0.8518	10.7313	10.3044	9.8459	5.8911	9.0126	11.3402	7.6071	7.9476	11.5168	9.9068	12.65	13.4251	10.0308	11.4327	10.3209	393	0
TCGA.A8.A07B	LumA	5.348	11.9545	12.403	4.7244	15.8158	9.7732	0	5.739	10.3276	0	10.183	9.5684	10.0025	4.3129	8.7181	11.0309	5.9706	6.2035	7.16	10.0808	12.3124	10.9756	10.4442	11.7655	11.2783	1308	0
TCGA.AO.A125	NA	9.2372	11.7146	8.7398	6.8095	13.752	10.9931	7.3146	7.9011	10.6211	1.3299	8.1806	10.3687	1.7096	5.775	8.1824	10.3462	7.7546	7.7188	4.6347	9.9017	10.9027	11.1071	11.2561	10.8921	9.645	3456	0
TCGA.BH.A0DS	LumA	8.8752	11.8269	11.5723	6.4028	15.0196	10.4232	3.8034	7.8899	10.6828	0.971	8.6367	10.2366	10.2008	5.7861	9.2059	10.4571	6.5344	8.1215	10.7091	10.0642	11.8282	11.57	10.9644	11.1312	10.6138	78	0
TCGA.BH.A1FU	NA	7.2778	12.6302	14.2546	7.7217	15.2421	10.8218	1.4502	7.2161	10.263	1.2012	9.6195	10.3311	11.6068	5.3342	8.8977	10.3928	6.446	7.8757	8.478	10.7755	13.1535	11.5468	10.1092	11.4152	10.8249	1688	1
TCGA.E2.A1B0	Her2	8.9729	12.6949	13.4558	8.2628	15.4173	11.1227	0.4555	6.8732	10.153	0	10.3606	10.1483	10.6883	5.4144	9.2809	10.5765	6.4909	7.2492	10.1833	10.1867	13.2278	12.3864	10.3618	11.9115	11.1664	1631	0
TCGA.EW.A1OV	Her2	5.8701	12.2619	11.4051	6.354	15.0221	11.5505	2.2302	8.7686	10.9039	0	10.6764	11.7714	10.6622	7.677	9.5758	9.7343	6.7698	7.2811	5.857	9.1172	12.5219	10.9955	10.4034	11.3728	10.4985	789	0
TCGA.E9.A1RG	NA	9.4808	12.5869	10.0842	3.4238	15.2086	11.9196	0.548	9.2308	10.8007	1.2548	10.9857	9.8572	8.4252	7.6429	8.9033	10.126	6.5385	8.344	11.8953	8.9364	13.2763	12.3511	10.7505	10.4414	10.0762	647	0
TCGA.B6.A2IU	LumA	9.5633	11.7781	8.9235	6.5602	14.6208	11.1876	1.6584	7.1561	10.6802	2.1999	10.634	10.1913	8.471	7.0521	9.2111	10.7481	7.1561	7.5091	6.4942	9.2285	11.627	11.5786	9.5046	10.9962	10.2342	5176	0
TCGA.BH.A28Q	LumA	8.2261	12.1194	12.8453	6.5159	14.7527	10.2968	3.657	7.2188	10.3229	0.5898	9.6253	10.2371	11.1697	5.6519	9.0546	11.2476	7.737	7.5534	5.599	9.8468	11.7687	11.5275	9.8897	11.1732	10.7006	1119	0
TCGA.3C.AAAU	NA	8.3457	12.5419	8.8884	5.6674	15.3866	12.0583	10.9801	8.9449	10.9678	6.0323	10.9382	10.3138	8.5634	7.4158	8.2163	11.1962	7.753	8.1105	3.6292	10.1958	12.3923	11.5583	9.4064	11.5313	10.0111	4047	0
TCGA.A2.A25B	LumB	8.3097	12.1174	11.2598	5.1172	15.4925	10.7906	1.024	7.3512	9.8502	1.024	10.3047	9.4535	10.0197	6.4426	9.6086	10.6952	6.0841	6.5497	11.2962	9.9556	11.6244	12.7416	10.9222	11.4006	12.4451	1291	0
TCGA.E2.A1IG	LumA	9.2207	12.3444	11.748	6.2322	14.8406	10.5682	3.0545	8.2103	11.0534	0.4916	9.9341	9.9719	10.7006	7.7871	9.4673	10.4555	6.6032	7.2559	10.7604	9.0576	11.5586	11.5408	9.627	11.3274	9.5105	2140	0
TCGA.AR.A0TT	LumB	6.9561	12.2192	10.5677	5.8245	14.5271	11.8445	3.2577	9.0352	10.6388	1.6037	10.1056	10.4628	11.1859	6.019	9.4529	11.0082	7.0874	7.5181	7.0612	9.2801	11.6838	11.821	9.9894	11.4811	11.0815	3316	0
TCGA.E2.A153	LumA	8.8812	12.3503	12.9585	6.5003	14.4414	10.3757	3.2238	7.9145	10.8933	1.0788	9.0451	9.9712	10.6562	5.6641	8.725	10.6868	7.0713	7.3424	9.1991	9.6015	11.6201	11.5095	10.1084	10.9205	9.8478	707	0
TCGA.A2.A0SW	LumB	7.7071	12.994	10.3248	6.0772	14.7682	11.4165	0.5248	7.944	10.8545	1.2118	10.5318	9.661	10.8052	6.3357	10.1592	10.5215	6.6205	7.0511	10.704	9.8102	13.5054	12.1276	10.7744	11.0729	11.422	1365	1
TCGA.A7.A0CE	Basal	6.0973	13.6724	12.6239	8.361	15.4706	9.6482	1.2363	7.6585	10.2888	4.9305	11.2819	10.4821	9.338	6.972	9.9095	10.6528	7.9287	7.2972	14.0394	10.2993	13.9516	11.7685	11.0472	10.7866	10.7909	1074	0
TCGA.AR.A2LM	NA	7.2475	11.8277	12.997	8.2972	14.2091	11.2296	4.698	7.3371	10.3279	0	9.6008	10.6041	11.6649	6.1358	9.3263	11.1114	6.989	7.1017	4.1239	9.5413	11.2627	10.893	9.3688	10.9375	10.0228	1935	0
TCGA.C8.A12Q	Her2	6.7209	13.0136	11.1994	6.8049	15.0052	10.7044	1.3177	7.8491	9.7171	0.3768	10.2172	10.4695	10.7961	5.3126	9.3101	11.0553	6.8902	7.4466	13.212	9.3033	13.1906	12.2095	10.2472	12.3892	11.9837	385	1
TCGA.AC.A6IX	NA	8.0053	11.7287	11.1319	7.9157	14.7833	12.0279	0.4485	8.4599	10.3843	1.2977	9.6049	10.6629	10.0649	5.9403	9.726	10.1386	7.3953	7.8544	9.2746	9.2472	12.1188	11.3406	10.0998	10.9344	10.5133	373	0
TCGA.A2.A04Y	LumB	9.4763	12.9421	9.4524	6.8771	15.0955	11.303	2.1196	8.589	10.4776	1.5885	9.4253	10.7858	9.5124	7.415	9.9252	10.8113	7.009	7.2115	6.1068	10.2646	12.3341	12.189	10.9346	11.049	10.5377	1099	0
TCGA.D8.A1JB	LumA	6.9443	12.2205	11.0141	8.3525	14.7837	10.9253	2.7736	8.57	10.2938	0.9246	8.8097	10.0842	10.7623	5.5901	10.3872	10.3051	7.1859	7.3734	7.0507	9.5595	12.6647	11.3596	9.9274	11.3595	10.9045	1688	0
TCGA.A2.A0EX	LumA	8.4582	12.327	11.1194	7.5759	15.0196	10.4136	8.5197	6.717	10.7933	0.5239	9.6798	10.0713	10.8496	5.8968	9.072	10.5292	5.7659	7.7132	10.3341	9.874	12.7689	11.8648	10.427	11.1666	10.6481	752	0
TCGA.B6.A0RH	Her2	8.8196	13.2011	11.2767	5.5215	15.3673	10.2495	4.6676	7.167	11.4578	0.4264	10.1942	10.3479	9.388	6.9742	10.7689	9.9633	5.4247	7.657	9.0626	8.6947	12.5187	11.6744	11.2978	11.0545	10.0121	6456	1
TCGA.E9.A22H	LumB	9.2448	12.2749	9.776	6.4501	14.9186	10.8632	3.6261	7.8672	9.5491	0.3245	10.5246	10.2013	8.1255	7.064	10.7931	11.5489	7.1595	7.0402	8.565	9.8618	12.4429	11.2394	10.3793	11.3522	10.6879	1232	0
TCGA.AQ.A0Y5	LumA	8.1377	12.0316	12.3679	6.9615	15.9791	11.1032	2.4826	7.2555	9.983	3.8494	9.5068	10.3834	11.7705	5.7156	8.6282	11.4303	6.4855	6.3296	10.698	9.5475	12.6878	11.2512	10.4606	11.996	11.1481	172	1
TCGA.AN.A0XS	NA	9.1791	11.8529	10.723	7.0948	14.8524	10.6594	4.2214	7.9551	10.9455	1.8542	9.4832	10.0893	11.1543	6.434	8.3744	10.5193	7.2138	7.727	4.2465	9.5324	11.6201	11.5501	9.6032	11.0784	9.5125	NA	NA
TCGA.AO.A0JM	NA	9.4542	12.2842	10.5465	4.0587	15.2021	11.0314	1.3973	6.7443	10.2882	0	10.1049	9.9594	9.8729	6.8651	9.7111	10.5011	6.4386	7.9108	10.5248	9.1866	11.753	12.7371	10.3748	11.792	11.0928	2184	0
TCGA.B6.A0RE	Basal	5.7717	12.4464	11.9503	7.1473	15.5074	11.0951	0.4707	8.5443	11.3402	2.2805	10.7217	9.8273	8.9896	6.7213	10.9703	9.5887	6.5068	7.7098	9.8267	11.3469	12.9462	12.3293	10.8602	11.1791	11.169	7777	0
TCGA.AR.A2LJ	NA	8.3545	12.6337	10.7381	6.7764	14.6137	10.9611	3.2458	8.9336	12.1565	0	10.0517	10.2761	10.2954	6.9023	8.819	9.3956	6.0793	7.944	2.8806	9.341	12.653	11.5395	10.212	10.4054	9.9569	2632	0
TCGA.JL.A3YW	Her2	7.7625	12.821	11.2935	6.0512	15.0687	11.2557	2.0848	8.9964	11.5359	1.0571	10.05	9.8426	11.0833	7.0414	10.1277	9.7977	6.8343	7.8096	11.0273	9.4337	13.0307	11.3965	10.1864	11.0011	11.5445	360	0
TCGA.LL.A5YN	LumA	7.9304	12.6216	7.896	5.2561	14.5106	11.2892	6.9332	8.5848	11.9989	1.8529	9.9672	11.4511	8.647	6.2267	10.0029	9.0661	7.2577	8.2231	11.5557	8.3393	13.1844	12.0261	10.4093	10.535	9.8731	447	0
TCGA.B6.A0WV	LumB	9.2907	11.8327	9.9568	8.3914	14.6053	10.2988	0.9258	7.3875	10.8507	2.2012	10.5472	9.0548	8.5711	7.6093	9.2314	11.4563	6.9898	6.7497	8.8936	9.5542	13.1746	11.8885	10.2998	11.5182	10.7484	2417	1
TCGA.B6.A400	NA	6.4491	12.8581	12.7454	8.5468	15.4987	11.5267	3.4915	9.2373	11.0102	3.5286	11.0754	10.0542	10.9287	8.0101	11.1258	9.4333	7.1539	8.266	10.2025	10.7141	12.0381	11.7831	10.1015	10.4859	10.7596	215	0
TCGA.E9.A244	Basal	6.2812	12.8101	11.8174	9.2905	14.9004	11.4333	2.0932	6.3052	11.0864	1.2059	10.3045	10.2405	9.5903	6.867	10.1024	9.691	7.0871	7.6529	11.4442	11.3617	11.6067	12.3112	11.2068	11.1139	10.5525	NA	NA
TCGA.E2.A1IH	LumA	8.7232	11.7631	11.1172	7.9115	15.266	10.3003	2.8548	8.7868	9.8491	0.9886	9.9838	9.9314	10.7028	6.1645	9.6966	10.0509	7.4531	6.9042	6.2318	9.8049	12.319	10.77	10.662	11.6691	10.7148	1026	0
TCGA.BH.A0HU	LumB	8.1949	12.2867	8.9823	5.2434	15.4105	11.018	4.181	7.0633	10.2167	0.418	11.5444	10.6423	8.5406	8.6927	9.4793	10.2867	6.5141	7.9085	8.7677	10.2707	12.2185	11.4538	11.0091	11.2073	10.5926	392	0
TCGA.AQ.A54O	LumB	9.0948	12.079	8.3512	9.3163	13.9407	11.6074	0.6365	9.7978	11.4587	5.2114	9.2863	9.2786	7.8899	7.52	9.3782	9.1408	6.7848	8.2654	6.718	9.1578	11.6082	11.4004	10.9065	11.2267	9.2709	1001	0
TCGA.EW.A3E8	LumA	8.3791	12.1396	10.9635	7.168	14.2151	11.4214	1.0909	8.467	11.3789	0.8856	9.1382	10.6796	9.7597	7.1331	10.1853	10.1744	7.0046	7.2915	4.4155	9.2005	12.0331	11.2031	9.6584	10.4321	9.8046	1035	0
TCGA.AR.A1AX	LumA	6.2452	12.1886	12.1147	7.6498	14.8084	10.8716	8.1791	8.3172	9.8592	1.329	10.2979	10.2282	10.7319	5.7959	10.3536	11.0972	7.0751	7.7043	9.0751	9.7507	12.5178	11.2486	9.8229	11.5014	10.9922	2629	0
TCGA.PL.A8LZ	NA	5.874	12.7728	11.8204	7.6641	15.1629	11.0939	1.4373	8.3486	10.6647	2.9695	10.9941	10.5412	10.1786	6.7943	12.6502	9.4601	6.6632	7.9803	3.2541	10.6985	12.5901	12.0106	10.3224	10.6681	11.2731	302	0
TCGA.A8.A08Z	LumA	7.3819	12.0694	13.6262	6.3986	14.463	10.9483	7.9489	8.1346	10.3736	0	9.6236	9.9454	11.3849	6.192	9.1758	11.2287	6.2919	7.4589	8.3889	9.8644	11.8348	10.7964	9.8983	11.0622	10.9365	1217	0
TCGA.A7.A4SB	LumA	7.6811	11.7302	11.5345	8.7397	14.4353	11.9582	0	8.3166	10.7437	1.1026	9.8951	10.3675	9.2834	7.6078	9.1565	10.0907	7.4964	7.3417	9.4196	9.0513	11.4062	10.7495	9.8411	10.9804	10.4591	418	0
TCGA.E2.A14Q	LumA	10.1252	12.3239	11.0076	8.44	14.7737	10.9722	0	7.4963	11.0069	0.7345	9.162	10.4398	10.4908	5.8333	9.0786	10.7866	6.2669	7.5433	11.6246	9.0759	12.461	11.4496	10.5743	10.6797	9.8377	1163	0
TCGA.BH.A1FB	LumA	8.8512	11.9289	12.5535	9.6642	14.7095	10.6088	6.3211	8.0152	10.253	0.9111	9.1029	10.047	11.8314	5.5991	9.8935	11.2768	7.2946	6.9642	4.6478	9.6062	11.799	11.3291	9.6968	11.0782	10.4535	3669	1
TCGA.A8.A06U	LumA	8.5303	12.2266	10.0092	10.0689	15.4878	11.6213	0.8302	8.176	10.8221	1.1156	9.3939	9.4852	9.0696	7.0622	9.6409	10.7333	5.8093	6.9577	8.5941	9.1677	13.2102	11.5733	9.3308	13.031	12.7562	883	1
TCGA.AN.A0AM	LumB	8.2161	12.9643	10.5016	10.2905	15.2532	11.3633	2.3741	8.0033	11.779	2.7178	11.0167	9.8993	10.5904	6.5815	10.2201	10.6617	9.0573	7.1088	9.3112	10.2327	12.2635	12.6771	10.0426	11.9086	11.6563	NA	NA
TCGA.AN.A0FW	LumA	8.2911	12.5646	9.7514	7.8033	16.2542	10.7733	0.9529	6.9457	11.2713	0	10.8129	9.6441	9.3822	5.8846	8.7235	10.0982	6.6864	7.2798	5.2758	10.0721	12.2874	12.8675	10.0908	11.1104	9.8662	NA	NA
TCGA.E9.A1RC	LumA	8.7207	11.2817	12.0343	4.2669	15.5884	11.233	3.1992	7.5219	9.4743	0.8024	11.1768	9.9811	8.9742	6.5095	8.4943	11.8636	7.6829	7.0439	9.2952	9.7785	12.2717	11.297	10.4975	11.6697	11.731	1224	0
TCGA.A2.A0T7	LumA	8.3486	12.1538	11.8593	8.2007	14.7829	11.7422	2.6322	8.2603	10.4845	0	10.4542	10.4836	11.2366	6.2376	9.2614	10.701	6.2966	7.6462	8.3085	9.6123	11.9223	11.7273	9.368	11.3349	11.4937	631	0
TCGA.LL.A6FR	NA	7.0283	12.8212	10.0229	4.605	15.2957	10.2308	0	7.5243	12.1809	1.167	11.3654	10.0646	9.9582	7.5523	10.8273	8.5518	5.8806	8.2344	12.7274	10.1922	12.918	11.7071	11.3824	11.3421	9.4208	489	0
TCGA.BH.A8FY	NA	9.0817	12.8355	8.901	6.0736	14.829	11.7366	1.6865	9.0728	11.4988	1.0768	9.6604	10.5484	5.7345	7.4335	9.0367	10.8318	7.3777	8.1092	8.4208	9.7551	11.3482	10.6214	10.8695	10.793	10.1046	295	1
TCGA.E2.A14W	LumB	8.2539	13.0433	10.8451	6.8275	15.0954	10.5743	5.5546	8.5029	10.8224	0	9.6691	10.0188	8.6608	7.5204	8.0049	10.9932	6.7073	6.4231	4.2272	10.9949	11.9962	12.603	10.174	11.9589	10.9696	974	0
TCGA.D8.A140	LumA	8.3258	12.2513	10.3326	6.2091	14.8125	11.7357	6.4679	8.0484	10.5878	5.2136	10.1862	9.8001	8.9412	6.3592	10.0459	10.9842	7.7074	7.3001	10.7203	9.539	11.488	12.5499	9.5145	11.1249	10.04	403	0
TCGA.A7.A3IZ	LumA	7.8009	11.6851	9.6487	4.7319	14.8531	12.7312	2.0164	6.7898	10.8324	2.4328	10.6285	10.0437	7.428	7.3324	9.1825	10.3422	7.5324	7.2791	5.1911	9.4212	11.7134	10.4637	8.5674	11.1307	10.9782	322	0
TCGA.A2.A1FZ	LumA	8.1455	12.0996	12.0434	8.579	14.2792	11.0853	0.4995	8.32	10.4104	0.4995	10.4442	9.8875	10.6087	5.7869	9.217	10.7923	7.0279	7.1715	7.6138	9.3121	11.4759	10.8124	9.844	11.8649	10.7399	683	0
TCGA.LL.A9Q3	NA	7.2872	12.3566	9.6767	4.6094	14.7517	11.1994	2.5982	8.5452	12.159	1.0079	9.2301	10.5923	8.4509	6.1358	8.8312	10.4696	6.3375	7.7402	13.8691	8.9015	12.76	12.1597	10.8835	10.4936	10.2518	532	0
TCGA.BH.A1EO	LumA	7.8158	11.8811	11.8857	7.1223	15.214	10.6092	6.4497	8.0796	10.1987	0	9.7869	10.2545	11.6191	5.4935	9.3454	11.049	6.7241	6.5762	8.6371	9.4256	11.9394	10.4401	9.9087	11.2846	10.4341	2798	1
TCGA.AC.A2FB	LumA	8.0368	12.0023	11.7302	9.2404	14.7722	11.0629	3.5076	8.2345	10.5071	0.98	9.5598	10.1673	10.9255	6.0669	10.6082	10.7371	6.8399	7.208	9.1096	9.4906	12.1897	11.4683	9.929	10.926	11.0433	1234	0
TCGA.A7.A2KD	LumB	7.4247	11.6537	11.2072	5.177	14.3913	11.2731	1.6486	8.4339	10.3243	0.3413	10.3303	10.157	10.2427	8.4959	10.1546	11.0042	8.3672	7.2485	11.5516	10.5258	12.6376	12.3238	10.039	10.9027	12.1543	679	0
TCGA.B6.A0WS	LumA	6.9461	12.1897	10.6529	6.3331	14.5402	10.9744	2.1459	8.1356	10.5963	0.425	10.3963	10.164	9.8184	6.5201	10.4999	11.2747	6.5256	7.4515	10.8088	10.4737	12.1618	11.4118	9.9563	11.4643	11.4872	2965	1
TCGA.B6.A0RS	Her2	7.9066	12.2274	9.4716	6.6345	14.8027	10.4263	2.4381	7.8952	10.9942	0	10.4805	9.8468	10.1836	7.1324	8.7523	9.6505	6.5022	8.2375	7.3867	9.0831	12.6265	12.1981	10.9336	11.4936	11.3829	3063	1
TCGA.LL.A5YM	LumB	8.8166	12.7581	6.9278	4.7938	15.6936	10.6755	4.957	9.4248	12.6306	4.8335	10.9143	9.8183	8.2403	8.7707	6.6993	10.3619	5.0263	9.2903	10.1914	9.1039	12.2669	12.0375	10.9516	11.3989	10.3125	466	0
TCGA.BH.A0EA	LumA	7.4878	11.8155	12.5948	7.9901	14.4335	10.7573	2.4078	7.588	10.6083	0.5641	8.7618	10.1407	10.4289	4.9584	8.8133	10.6625	7.2454	7.6751	6.4531	9.162	12.1044	11.4968	9.6621	10.7537	10.0492	991	1
TCGA.AR.A1AO	NA	6.8037	12.4038	11.5772	8.0503	14.449	11.0994	7.5261	9.4988	10.412	0.9896	9.8985	10.114	11.6658	5.6184	10.6793	10.2135	6.5891	7.4657	10.1491	9.8592	12.5968	11.6062	10.1878	11.1346	11.7858	2618	0
TCGA.AR.A24Q	Basal	5.7622	11.4626	13.4673	9.4105	15.2349	11.0633	3.4069	7.3398	10.418	1.2961	10.6534	9.9676	11.0289	6.9447	8.9657	10.374	7.8911	7.513	4.1129	10.9713	12.2112	11.8584	10.7587	11.0494	12.1346	3172	0
TCGA.AR.A24V	NA	8.0942	11.9087	11.5509	6.4321	14.702	10.4557	5.6448	8.2292	10.5812	0	9.9188	9.8099	11.8254	7.0676	11.3138	11.435	6.2464	7.0439	8.659	9.2399	12.0488	11.1586	9.8741	11.3716	11.001	3203	0
TCGA.A7.A26I	Basal	4.9354	12.3909	12.4371	5.7861	16.9346	11.0303	3.7493	8.8821	10.2518	2.2004	10.2485	10.3394	10.9047	6.9588	10.6675	10.387	5.8916	6.9294	9.138	10.4339	13.3083	11.4355	10.725	11.4548	11.4306	661	0
TCGA.UL.AAZ6	NA	7.5317	12.6746	8.6802	3.8629	15.494	12.5788	10.096	7.9595	11.6871	0.8467	11.3061	10.6552	6.5969	6.7763	10.3777	10.0176	7.4049	7.0525	11.1585	9.8055	13.1211	12.0283	10.5816	10.7249	11.4565	518	0
TCGA.LL.A5YP	Basal	4.4756	13.0059	11.9529	6.0485	15.0526	10.8002	1.2365	8.4419	10.9901	1.8924	11.8435	10.0866	10.7584	7.1878	10.0697	9.0398	7.0748	7.8524	9.2124	9.9847	13.0894	12.1276	10.4416	10.8114	10.9245	450	0
TCGA.C8.A138	Her2	9.0709	12.1043	10.4052	6.5845	14.9857	10.9689	1.611	8.0074	10.5343	0.5981	9.2483	10.436	10.4595	6.7796	9.1539	9.6728	6.9515	7.9754	10.5761	10.0737	12.0993	11.5313	10.8984	10.8116	11.8971	380	0
TCGA.C8.A27B	Basal	5.9682	12.1009	12.0514	7.2055	15.9531	10.4546	0.6061	8.337	10.5831	1.3596	12.2387	10.8652	9.2219	7.3619	12.4651	10.0073	6.4014	7.4062	10.0576	10.8798	13.8655	11.9155	10.4578	11.5149	11.45	439	0
TCGA.AR.A1AH	Basal	5.124	11.8855	10.9695	4.597	14.9684	10.859	0.7405	8.4025	10.1594	2.1223	10.3726	11.3304	9.7348	7.1337	9.6025	9.0116	7.4905	7.963	5.7091	10.8316	12.8121	11.9271	11.2209	11.055	11.1607	3807	0
TCGA.PE.A5DC	NA	8.175	11.9122	9.6945	6.5622	15.9771	11.8779	8.0935	8.6992	11.6209	0	10.9567	10.4342	8.7902	8.4336	10.3245	10.0637	7.381	8.1534	7.8468	9.5157	11.7693	11.3742	9.9228	11.4659	10.1243	1430	1
TCGA.AR.A0TY	LumB	9.5385	12.7029	9.6182	5.5294	15.42	11.0749	0	8.0077	10.8711	0	11.2153	10.2411	8.8654	6.3598	7.3899	10.4584	7.4174	7.7641	7.8351	10.4246	13.135	14.4905	10.7016	11.9748	11.3844	1699	1
TCGA.A7.A6VW	NA	6.4334	12.341	10.2549	3.8809	15.4462	11.1287	2.3662	9.3631	12.6571	1.2541	11.8576	11.5512	8.8661	8.0293	11.3441	9.0017	7.2825	8.0097	10.8204	10.3173	13.8242	11.011	11.24	10.8654	9.7967	285	0
TCGA.BH.A0HO	LumA	8.5393	12.6944	9.7956	5.1449	15.121	11.2398	3.2019	8.2487	10.7225	0.3593	8.9945	9.7456	9.0531	5.8726	10.6113	11.3976	6.1921	7.3666	12.6021	10.166	12.3707	11.6186	10.3623	11.4095	9.6919	76	0
TCGA.C8.A12U	LumB	8.9599	12.8413	7.6957	4.0962	15.3689	10.172	6.9822	8.3013	10.918	0.5185	10.6884	9.4715	7.0168	6.7818	9.3381	11.0228	8.5529	7.7747	5.3654	10.5446	13.0865	14.5387	10.4766	12.0853	10.545	385	0
TCGA.D8.A1XO	LumA	7.2855	11.5673	10.6496	7.0927	14.7284	11.0359	5.5112	8.0224	10.3709	1.0808	9.2979	10.4684	10.6544	5.4505	8.6518	11.532	7.0975	7.1951	6.4269	9.688	12.1231	11.1678	10.0779	11.4096	10.24	1682	0
TCGA.AC.A5EH	NA	7.898	12.5543	10.2773	4.7781	13.8985	11.7927	0	8.5252	11.665	1.4057	10.3415	9.1477	9.8029	5.356	9.1008	10.506	7.0239	7.903	12.1605	9.377	13.0378	11.6247	10.2181	10.9918	10.4382	511	0
TCGA.E9.A1R0	LumA	9.3372	12.0094	10.1307	8.1822	14.3428	10.6605	7.63	7.3295	10.9686	0.9107	9.9649	10.0351	10.2669	6.3934	9.4419	10.5985	6.7595	7.6617	5.7415	9.288	12.0318	11.2197	9.8736	11.0973	9.3168	860	0
TCGA.PE.A5DE	NA	8.5213	12.3501	9.7762	7.3439	14.4078	11.4836	2.0388	8.7379	11.2955	0.9171	10.1824	10.651	9.2432	5.6915	10.1025	10.2794	6.5923	7.6972	11.6901	9.0997	12.3054	11.2322	10.0861	10.5157	9.9299	2645	0
TCGA.A2.A0CO	LumA	8.136	12.0744	10.9229	8.625	14.081	11.2183	4.4793	7.7697	11.17	1.4174	8.8679	10.4071	10.2857	5.5196	10.8063	10.0447	7.156	7.992	11.5261	9.182	11.5622	11.1121	9.4959	10.2171	9.7494	3492	1
TCGA.A8.A06T	LumA	8.3985	11.6963	9.5492	8.5198	15.6803	10.9397	1.0483	8.7944	10.3032	0.6173	10.1055	10.3144	9.0871	7.7327	9.7151	11.6832	6.3559	8.0705	4.0893	10.252	12.5023	11.3098	10.4542	11.6053	11.43	1614	0
TCGA.D8.A1X7	LumB	7.8811	12.8252	13.0493	6.1274	15.0766	10.5585	6.1633	8.0605	10.0446	7.0164	10.0531	10.079	9.8629	5.7327	9.2243	11.5418	6.7378	7.2104	9.5115	9.6518	12.0215	11.4737	10.0337	11.874	10.2716	509	0
TCGA.A2.A0D2	Basal	4.1402	12.1238	12.0328	8.2306	15.8414	10.9668	1.3095	7.6481	11.1649	0.4538	11.5113	10.5773	10.9325	7.6398	9.7507	9.5828	6.4511	7.6614	9.8237	11.2479	13.2503	11.4998	11.9611	10.652	10.9418	1027	0
TCGA.A1.A0SM	LumA	8.331	11.7844	11.7261	6.0912	14.8821	11.9998	0.706	7.8105	10.8549	0	9.7913	10.2643	11.1993	5.688	9.0055	10.0602	6.2628	7.0444	11.1917	9.6357	12.2022	11.9094	10.0177	11.1032	10.7559	242	0
TCGA.A2.A04U	Basal	7.8495	14.2559	12.2617	8.7178	15.0942	8.947	3.2192	6.9915	12.1501	0.6036	11.3767	9.4497	8.6926	9.3689	9.9455	7.959	5.8035	8.7259	8.8382	11.3764	12.3547	11.5081	11.409	11.1791	11.2967	2654	0
TCGA.BH.A1EV	Her2	8.0724	12.9331	11.5347	5.3733	15.2348	11.0716	4.8743	6.8418	10.4992	0.4731	11.1584	11.3424	9.8837	5.7238	8.7293	10.8724	7.4533	8.5452	10.0803	9.2905	12.6342	12.2529	9.0852	11.7106	11.4993	365	1
TCGA.A1.A0SG	NA	9.9689	12.2289	11.3568	6.0056	14.0926	11.0695	0.4436	8.2279	10.9924	0	9.7721	10.3668	10.1259	6.3066	8.4959	10.6035	6.3512	7.9644	5.3434	9.1805	11.939	11.6553	9.8574	10.8667	10.5924	434	0
TCGA.GM.A2DM	LumA	8.2244	12.2703	11.4041	6.9446	15.191	11.3601	7.244	8.4245	10.8502	1.1119	8.0244	10.2061	6.9117	6.1455	9.2424	11.1213	6.7682	7.503	4.4274	10.0605	12.0138	11.304	9.9412	11.5217	11.3437	3226	0
TCGA.OL.A5RU	NA	8.367	12.458	9.8074	11.2362	14.5435	11.4668	2.4113	8.5055	10.9973	1.4478	9.0561	10.3979	9.4918	5.5033	8.9366	10.3356	7.2291	7.5941	6.5658	9.4058	12.3377	11.4666	9.8673	11.0034	10.012	1219	0
TCGA.A7.A5ZV	Basal	4.0187	12.7542	11.6532	7.911	15.9735	13.2802	0	8.7922	11.9787	1.5366	11.3879	9.1867	11.8326	6.2878	9.4262	9.51	7.6438	7.2342	7.2761	10.1681	12.8229	11.8962	10.3001	11.7806	10.0368	368	0
TCGA.A8.A08G	LumB	9.1371	11.9761	9.7755	4.9148	15.5236	12.1713	3.8716	8.5397	10.9574	1.9641	10.2711	10.363	9.1795	7.1599	10.1885	11.5279	7.5866	6.9239	9.4767	9.184	12.1736	13.2676	10.0063	11.1941	11.6235	607	0
TCGA.GM.A2D9	LumA	9.0933	12.4147	10.0542	6.203	14.1167	11.6773	0	7.9726	11.1521	1.9606	8.3883	10.4961	9.3579	6.5107	9.5057	9.8725	6.8086	8.0054	11.303	9.4531	11.5203	11.2582	10.0433	10.6066	9.6188	1812	1
TCGA.B6.A0IJ	Basal	5.38	11.8229	8.1186	5.2341	15.6598	10.8905	1.5666	9.6216	11.1249	2.2153	11.9382	10.1154	8.4016	7.8019	11.1098	9.9653	6.7818	7.662	10.9916	10.394	13.093	11.3805	10.7069	11.4673	11.0919	7106	0
TCGA.A2.A0CX	Her2	7.274	12.5609	10.8645	6.0184	15.2235	10.6141	2.3322	7.7312	10.4787	0	11.0699	10.1935	10.675	6.608	9.2913	10.2967	6.4016	7.5903	12.1097	9.7867	12.8889	12.2585	10.1955	12.2097	11.8333	1728	0
TCGA.A8.A07P	LumA	9.3571	11.7046	9.7826	4.9787	15.3847	11.1693	6.1805	7.8021	10.5286	0	10.0598	9.2645	9.2248	6.5371	10.0889	10.5975	5.7043	7.8504	10.7077	9.2902	12.9364	12.1654	10.1112	11.7253	11.3365	334	0
TCGA.AO.A12F	NA	6.2518	13.0671	11.837	7.7683	15.0787	10.2824	0.4226	7.5713	10.8193	0.749	10.8603	10.5808	11.4604	8.0612	9.2204	9.103	8.5135	8.1589	4.552	10.7506	12.304	11.6924	11.7589	11.1843	10.8547	1842	0
TCGA.D8.A1JI	LumB	8.9675	12.1069	8.0471	4.9011	15.1004	10.6401	12.4428	7.6746	10.8377	0	9.4167	10.3781	7.134	6.1557	8.7865	11.0365	7.5934	7.699	2.9181	9.7322	11.9475	11.7724	10.0153	11.3242	10.5594	577	0
TCGA.A8.A08A	NA	8.6967	12.096	10.7889	9.1141	14.9012	10.9331	1.4901	7.8343	11.2064	1.0603	9.8747	9.9673	9.9753	5.9591	8.4018	10.4128	6.6089	8.0187	7.5771	9.9071	12.0666	12.0105	10.1534	10.8422	10.1461	30	0
TCGA.BH.A0BG	Basal	5.4817	12.4985	13.6211	9.5373	15.306	11.0971	1.678	8.6889	10.8345	4.0898	10.0746	10.405	9.3778	6.5184	10.4897	9.9835	7.313	7.201	8.1522	11.9395	12.4325	12.0666	9.9361	11.5457	11.3061	1871	0
TCGA.BH.A0H0	LumB	8.4832	11.9268	8.0278	6.4092	15.3737	10.5328	4.4411	6.1271	9.7218	1.3866	10.8724	10.4038	8.2312	7.6524	8.1158	10.9533	7.3151	7.7694	8.1788	10.0967	12.2504	11.5945	10.076	11.6477	10.7629	461	0
TCGA.E2.A14Z	LumA	8.5051	12.4622	10.7037	7.1452	15.3098	11.3071	10.0422	8.2634	11.1562	1.4822	10.7375	10.9906	9.9528	6.5808	10.1175	10.4299	6.5406	7.9495	4.3737	9.6204	12.5916	11.2787	10.1175	11.6812	10.2176	563	1
TCGA.C8.A132	LumA	7.2874	12.1338	12.1321	7.1344	15.8644	11.8858	3.247	8.1478	10.7462	2.2813	10.3624	10.3428	11.5152	5.3989	9.5553	11.2079	7.1011	7.6399	9.9093	8.9642	12.0607	11.0907	10.0415	11.5015	10.9466	383	0
TCGA.D8.A143	Basal	7.7691	13.2373	13.1386	5.5745	15.2436	9.8459	0.4629	7.4388	10.9561	0	12.817	10.2507	8.8661	7.3893	10.0252	9.9091	6.7056	7.4513	6.8674	9.9945	13.6044	12.4566	10.3548	11.7191	10.1424	431	0
TCGA.BH.A1F6	Basal	5.9826	12.6483	12.1074	6.4956	15.2354	10.776	5.1655	9.2237	11.2901	0.9583	10.386	9.8912	10.0107	6.237	10.9408	10.3066	6.5235	8.0215	11.538	10.7359	13.2043	11.1721	10.9736	11.17	10.8911	2965	1
TCGA.AO.A0J3	NA	7.2272	11.6904	7.5245	5.0246	14.2568	10.8528	11.4619	9.5361	10.6118	2.2409	10.585	10.8846	5.9806	7.7537	8.9402	10.9338	6.6668	8.1036	4.036	10.0729	12.3357	11.966	11.0369	11.6165	10.4907	651	0
TCGA.D8.A27M	Basal	5.9533	12.567	14.0182	10.0492	14.9775	11.1044	1.7921	9.1024	10.0966	1.158	10.2778	9.7195	11.1618	6.3579	11.2095	10.2899	7.4417	6.4816	11.3881	9.9637	12.3618	10.3432	9.7041	10.899	11.204	410	0
TCGA.D8.A13Z	Her2	7.8481	13.0386	11.7909	5.4223	15.6092	10.0278	1.0563	8.1016	10.4363	0.3447	11.2818	10.6041	10.0276	6.7479	11.1578	10.8426	6.8204	7.2544	9.5266	10.3141	13.0305	12.0535	10.0515	11.0339	10.8559	635	0
TCGA.A8.A06O	LumB	8.9361	12.2686	10.7333	6.6051	15.6534	10.2986	6.8354	8.1227	10.9456	0.4221	11.4451	9.5635	9.8653	7.4474	9.8318	11.306	7.245	7.6935	8.3151	10.5911	12.8409	11.7283	10.1024	11.8697	10.9231	396	0
TCGA.BH.A209	LumB	7.4611	12.2359	9.7173	8.0674	16.8725	10.8164	3.3043	8.7761	9.9804	1.8732	11.016	10.0863	10.5478	6.9983	10.6973	10.4028	7.5251	8.0417	5.656	10.6502	12.1755	11.4537	10.876	12.0066	11.2526	3959	1
TCGA.BH.A0EI	LumA	7.9167	11.9382	12.7498	5.9121	14.3651	12.2921	8.2155	7.8312	10.6905	0	10.1147	10.2936	10.4018	6.5414	9.6907	10.5185	7.1706	7.5748	0.8258	9.4562	12.5609	11.0862	9.5888	11.029	10.5208	1926	0
TCGA.E9.A1N9	Basal	6.231	11.8391	11.0422	7.536	15.9171	10.7859	6.6324	7.1165	10.68	1.495	10.7206	10.6345	10.6747	6.9197	9.043	11.1233	8.0358	6.4568	2.8808	10.2729	12.4898	11.1353	10.0822	11.6091	10.7642	1101	0
TCGA.B6.A0IK	Her2	7.4511	13.3805	12.2123	6.2462	14.8967	10.4794	1.7277	7.9464	11.1123	0	11.1073	9.7607	9.6167	6.4082	9.8483	10.7029	6.1603	7.6676	11.2007	9.0637	13.9619	12.5632	11.0341	11.8537	11.9956	571	1
TCGA.EW.A1IZ	NA	7.3976	12.6148	9.8613	6.9046	14.3383	11.0023	3.4934	9.0344	11.3067	0.8916	10.2723	10.4722	8.4429	8.0499	9.5787	10.0111	6.3988	7.6364	11.141	9.7568	11.8939	11.8102	10.4835	10.7495	10.6297	554	0
TCGA.E9.A3HO	LumB	7.5951	12.2472	9.9545	6.0786	14.6919	11.3323	11.6448	6.9887	11.6306	0.5059	11.4457	11.0853	8.4376	8.9352	10.3943	10.5976	8.0707	7.7382	8.9126	10.0178	12.0821	11.8763	10.1686	10.833	10.6502	1158	0
TCGA.AC.A3QP	LumA	8.9714	12.4198	10.3483	6.9003	14.7157	10.8936	0.819	8.3763	11.685	0	9.2098	10.1092	10.0708	5.9898	9.0588	10.0734	6.404	8.488	5.2063	9.469	12.6368	11.6527	10.6105	10.5957	9.6195	675	0
TCGA.BH.A0E2	LumA	7.9304	12.0047	11.2315	6.7346	15.5989	11.4633	3.0801	7.7316	11.3945	2.1802	10.1103	10.36	10.4251	5.7235	9.8965	10.7206	6.5846	7.5501	9.159	10.4314	12.7429	11.6999	10.5381	11.755	10.7691	435	0
TCGA.D8.A3Z6	LumA	9.1071	12.3853	10.8422	6.2947	14.6354	11.4843	1.7197	8.421	10.9537	1.3996	9.196	10.2629	9.961	6.0449	8.9487	10.0706	7.3988	7.5171	9.6275	9.0855	11.9137	11.4797	10.2533	10.6588	10.5652	563	0
TCGA.BH.A42U	NA	7.0966	12.0191	10.9567	9.1055	14.6046	11.219	5.0632	8.4099	11.6776	0	9.2095	10.4759	10.5375	6.3493	9.7387	9.3846	7.4635	8.1046	6.9943	9.3153	12.3036	11.569	10.0782	10.5226	9.8522	3364	0
TCGA.E2.A15O	LumA	8.1142	11.3049	9.1819	6.4914	15.0739	10.6084	9.0646	7.4298	10.7013	0	9.9798	10.6702	9.068	7.9223	8.4632	10.9899	8.1862	8.1078	10.6224	10.1162	11.7595	11.3351	9.883	11.0367	10.9241	1545	0
TCGA.E9.A229	LumA	8.6353	12.0062	11.3867	6.0838	15.0699	11.4901	3.5844	8.1079	10.2779	0.8676	9.697	10.5533	11.459	6.9946	10.8744	11.2365	6.7685	7.5935	5.4464	9.5418	11.7501	11.4148	9.9287	11.2259	10.6148	1148	0
TCGA.GM.A3NW	LumA	7.9577	11.6258	10.4159	6.9872	14.5771	11.8676	1.0763	6.9506	11.149	0.4536	9.434	10.0956	8.6021	7.0495	9.6026	10.5161	7.0665	7.9251	8.0369	9.7336	11.8852	10.6349	10.1164	11.0873	10.6601	3361	0
TCGA.LL.A6FQ	NA	9.8558	12.0923	7.1239	7.8067	15.3229	11.9852	4.961	7.9366	12.5901	0	10.0014	9.8805	8.091	7.1529	8.8013	9.7579	6.2377	8.3446	10.0186	9.042	13.0951	11.7411	11.1693	10.3846	9.2281	80	0
TCGA.D8.A27K	LumA	8.2471	11.9001	13.1112	6.884	14.3651	10.9889	1.2032	8.0071	10.1253	0.4066	9.0861	10.2976	10.9153	5.2566	9.2739	11.3469	7.2717	7.4422	4.1111	9.8055	11.7596	11.481	9.7629	11.0964	10.2678	1461	0
TCGA.A7.A3J1	LumA	7.0414	11.9863	9.9177	8.0191	13.7575	11.5827	1.6206	9.0439	10.8063	0.8303	9.8974	9.9989	10.4516	5.6708	10.9361	10.8034	7.8011	7.4601	7.7774	9.0072	11.6114	11.6223	9.4709	10.8465	10.5559	343	0
TCGA.GM.A5PV	NA	9.1021	12.5482	9.3422	7.4848	14.3555	10.4728	3.6882	7.7079	11.3669	0	8.8541	9.9667	8.5072	6.62	9.5123	9.9459	6.3689	8.1992	5.2426	9.4926	12.0749	11.3971	10.6819	10.823	9.9563	412	0
TCGA.AC.A6IW	NA	4.9009	11.9776	13.1191	6.5672	15.9277	11.1766	1.1912	8.747	12.5058	2.827	11.1851	10.7057	8.2884	6.6123	10.9559	9.3142	7.0951	8.5659	9.0905	10.9795	13.0049	12.2177	10.6306	11.5364	11.1467	413	0
TCGA.A2.A4RY	NA	6.5319	12.0647	12.0876	9.7116	14.4692	11.636	6.4772	8.3587	11.0005	0.5773	9.4055	10.6069	11.6504	5.8287	9.5928	10.3407	8.0326	7.2947	3.564	9.4232	11.5271	11.446	9.2416	10.611	10.0666	648	0
TCGA.AR.A0U0	Basal	7.4134	12.3047	11.4257	8.9152	15.6054	10.4904	0.8341	7.9788	11.8631	0.4765	10.0743	10.5006	8.7697	6.9295	11.5531	11.5749	6.1901	5.0313	8.685	11.2311	12.4476	11.7901	10.9443	11.4887	10.8793	1988	0
TCGA.BH.AB28	NA	8.2756	11.6279	11.6219	6.9287	14.4982	11.4054	4.853	8.0425	10.9091	0.484	10.609	10.7816	10.2234	6.3742	9.2366	11.1229	7.5231	8.0684	9.391	9.7244	11.8774	11.7892	9.8881	11.0816	9.8899	287	0
TCGA.AR.A0TS	Basal	6.8571	12.1775	13.8694	7.5259	15.8834	10.5394	4.0347	8.6037	10.1274	1.399	10.8169	11.2485	10.5114	7.1273	10.1752	10.3766	7.0042	7.3753	9.2528	10.4258	12.0831	11.3796	9.3623	11.2381	11.0212	2558	0
TCGA.E9.A1R5	LumA	8.7483	11.1614	10.7151	5.0811	15.0905	11.2921	9.6784	7.8717	9.9521	0	9.0931	10.2968	10.3089	6.5962	9.2552	12.0655	7.3078	7.5543	11.7337	9.8165	12.051	12.1494	10.3284	11.715	10.5655	92	0
TCGA.D8.A1JS	LumA	10.095	13.0972	7.2314	8.2186	14.8905	10.4305	9.3221	6.4259	10.9304	0	8.1776	9.9309	4.2831	5.7959	8.6533	10.409	6.5897	8.2891	8.6122	9.6381	12.773	12.3046	10.8729	10.9578	9.2695	371	0
TCGA.C8.A26Z	LumA	9.4944	11.9669	10.2851	5.4867	15.7703	11.1345	0.9249	8.624	10.098	0.378	9.6172	9.5917	9.5056	7.4073	8.8664	10.9949	7.3086	7.739	5.2071	9.0406	12.2798	11.562	10.0281	11.196	11.2801	470	0
TCGA.BH.A0HY	LumB	8.3809	13.1595	12.5332	5.759	15.4303	10.9229	5.0597	6.5378	10.6846	0	10.9943	9.2277	9.8476	6.3916	8.9387	10.2091	6.7547	7.2969	4.5272	9.1288	11.7267	12.5141	10.2804	11.9882	10.9476	1545	0
TCGA.AC.A2QJ	Basal	4.3899	13.9436	10.2261	2.7035	14.2516	12.093	0.6665	9.2329	13.191	0	10.6984	9.9807	11.6426	7.436	8.7879	8.4136	5.9421	8.5097	8.4528	8.937	13.0033	11.3043	10.6501	10.5412	9.3043	446	1
TCGA.BH.A0AW	Her2	7.0414	12.7299	11.6352	6.3897	15.2496	10.2786	2.3108	8.3304	10.9976	0	10.1508	10.1364	11.0291	5.5853	9.489	9.6089	5.1734	7.6575	8.1809	10.709	13.3165	12.0263	11.2704	11.1219	11.1793	622	0
TCGA.BH.A18P	Her2	6.7878	11.5981	12.6699	6.4545	14.432	12.0796	0.7928	7.4598	10.1931	0	9.728	10.8015	9.3955	6.9688	9.4551	11.0646	6.9071	7.1422	6.9504	9.624	12.2712	10.6516	10.0732	11.3416	11.0367	921	1
TCGA.A1.A0SF	LumA	8.6934	12.7274	10.3071	7.7165	14.867	10.9533	4.4589	6.908	11.5312	1.4402	10.1293	10.7208	10.9919	6.0137	8.6073	10.2113	7.0266	7.7892	8.0186	9.7709	12.9303	11.4108	10.4715	10.9731	9.2921	1463	0
TCGA.E9.A1NA	LumB	8.7014	12.8906	10.3134	4.8992	14.6778	11.7548	4.195	9.3118	11.1378	0.9468	10.5113	9.3111	10.3018	5.991	9.8269	10.8625	7.408	7.1931	12.1823	9.87	12.7452	13.1911	10.3654	11.8562	10.3995	1112	0
TCGA.E9.A1N4	LumA	8.0961	12.341	10.5959	7.0049	14.6665	11.6965	3.5372	7.6517	10.2973	1.1594	9.6705	10.0957	10.9478	6.2374	9.9471	11.4021	6.9962	7.2803	5.5961	9.4517	12.8502	11.076	9.9348	11.5348	11.0487	1000	0
TCGA.A2.A0EO	LumA	8.7469	12.1233	12.8614	8.4383	14.077	10.7335	0.7802	7.2548	10.393	0.4422	9.1859	9.6278	11.6042	5.7276	9.6285	10.684	6.7534	7.1162	4.8568	9.9406	11.7167	11.6606	10.2081	10.9504	10.2124	2442	0
TCGA.AN.A0XW	NA	8.25	12.4749	12.3858	6.8825	15.1588	10.4856	6.6468	8.526	10.1895	0.8303	9.9121	9.8538	10.97	6.9247	9.9392	10.6172	6.6745	7.1947	8.0738	9.3073	12.2025	10.9284	10.2515	11.3332	10.7888	170	0
TCGA.AO.A0J9	NA	8.346	11.8432	10.3779	8.7508	14.1836	10.5682	2.8288	8.3816	10.7653	0.8592	9.4306	10.4163	10.0598	7.1406	9.5975	10.1489	7.6381	7.6084	7.6023	9.9783	12.4027	10.894	10.8866	10.8206	10.5235	1613	0
TCGA.E2.A14Y	Basal	5.8883	12.5304	13.1794	8.2461	15.4541	10.3379	1.3719	6.5893	9.8455	4.3261	11.3602	10.3237	8.4763	5.3329	10.8017	10.2857	6.2612	7.6055	13.9254	10.882	13.8731	11.6295	11.0904	11.9041	11.3878	2109	0
TCGA.A2.A0CT	LumA	7.6678	11.7288	12.6472	6.2945	15.5853	9.8739	4.7506	6.5059	10.7327	0	10.5999	10.2248	8.2715	7.2851	9.366	11.0644	6.5581	7.1697	8.3791	10.2729	12.714	11.3306	9.6617	11.6534	11.3084	2289	0
TCGA.D8.A145	LumA	7.9111	12.0855	12.7305	8.0321	14.6644	11.1329	5.0033	7.6695	10.6448	0.8537	9.9103	10.319	10.7315	6.2197	8.8	11.2625	6.9457	7.4238	9.6011	9.5453	11.6006	11.1067	9.4816	11.2351	10.5858	410	0
TCGA.UU.A93S	NA	8.6661	12.0934	12.254	3.8874	14.6847	11.0938	0.7854	7.2084	11.3504	0	11.4552	10.7121	6.3958	8.4502	10.8137	9.9838	6.4932	7.5633	11.7902	9.0418	13.2524	12.1242	10.6407	11.4585	10.6472	116	1
TCGA.A2.A0YD	LumA	8.0592	11.9246	11.7349	7.6894	14.202	11.4096	4.6343	8.0328	10.4283	0.4028	9.1404	10.4682	11.2087	5.0363	10.4202	10.8448	6.9128	7.3658	11.0623	9.4209	11.5412	11.115	9.8023	10.8905	10.653	769	0
TCGA.A8.A08L	Her2	5.4434	12.5149	10.8476	4.9444	15.243	10.7175	8.1594	7.9968	10.9231	1.5378	12.2926	9.6848	9.1599	8.1268	8.8437	10.4236	6.5343	7.1991	7.3385	9.3452	12.9514	12.4551	10.1467	12.2788	10.6544	304	1
TCGA.A8.A0A7	Her2	6.8922	12.3693	11.2321	6.7021	15.0391	11.0834	3.7193	8.7407	10.8125	0.4778	9.8246	9.6253	11.5689	5.4401	10.603	10.2985	5.8562	7.1963	9.7795	9.6274	12.8271	11.1278	10.4851	11.21	12.2352	30	0
TCGA.A8.A06X	LumB	7.6346	12.3161	10.2374	5.2305	15.6288	11.2201	0	7.5719	11.5271	0.5819	10.5201	10.0116	9.2727	6.9352	10.4227	10.3711	6.2946	7.4295	7.0406	10.4341	12.774	13.1563	10.598	11.033	10.9722	943	1
TCGA.A8.A09A	LumA	6.496	11.8145	11.9348	7.4189	15.3949	11.0683	1.2384	7.6168	10.2498	0.9307	9.1412	9.4524	11.4589	6.8625	9.5011	10.8484	6.1173	6.7047	9.0092	9.5498	11.964	11.7961	9.802	11.1508	11.4214	304	0
TCGA.E9.A1RE	LumB	8.9712	11.5621	13.0122	5.5369	15.5034	11.2452	8.2608	7.3735	10.4365	0.3693	10.1846	9.8939	8.8005	7.4193	8.304	11.5554	6.7557	7.0184	9.1771	10.5841	12.1438	11.4145	10.3537	11.2962	10.5798	1419	0
TCGA.B6.A0WW	LumB	8.5472	11.5427	10.3121	5.9404	15.9598	10.4792	1.7099	8.2544	10.9775	0	9.968	9.6742	8.9577	7.0658	9.7254	10.3807	6.9699	7.7677	8.1631	9.1819	12.0023	11.1028	10.0592	11.5935	10.9279	558	1
TCGA.AN.A0FD	NA	6.5127	12.1083	11.0402	6.8097	15.5909	11.1693	4.9147	7.4082	10.7668	0	10.195	10.0875	9.8549	5.703	10.1822	10.7476	5.3974	7.2162	7.2025	10.3683	12.1097	11.6512	10.6525	11.3007	10.2908	196	0
TCGA.D8.A1JC	LumB	8.3315	11.4335	11.2174	7.0188	14.7989	10.6064	2.5213	8.5344	9.6705	1.3203	10.6963	9.7353	10.0839	7.161	10.9436	11.1613	7.2107	7.2593	8.8783	10.485	12.0516	11.68	9.815	11.6308	11.7843	480	0
TCGA.A2.A0SV	LumB	7.7046	12.2912	10.6453	4.2893	15.3399	11.2623	3.615	8.4153	11.1478	0.8828	11.2151	9.7432	10.2701	7.9398	10.5924	10.8434	7.1576	7.553	7.4147	10.0093	12.8283	11.7444	10.7201	11.4306	11.3041	825	1
TCGA.AR.A1AL	NA	6.8688	11.568	11.6887	8.7617	14.2756	10.9046	6.8961	6.9897	9.7041	0.7123	9.3292	10.4822	11.3353	5.7878	9.901	11.2108	7.1112	7.4324	5.7799	9.7085	11.6962	11.0334	9.6323	11.1078	10.191	2971	0
TCGA.OL.A5RV	NA	7.9805	11.8528	11.8172	7.8087	14.3907	11.4159	5.6263	7.9517	11.0025	1.8087	9.4195	10.2086	10.5048	5.9468	8.8505	10.4416	7.266	7.7	7.1025	9.221	12.1255	11.404	9.8837	10.6326	10.127	1062	0
TCGA.A7.A26E	LumA	8.4851	11.6702	11.2477	7.5882	14.867	9.9768	0.6144	7.2857	9.8493	0	9.3982	10.0577	11.0395	5.4855	8.8521	11.4564	7.4331	6.9282	8.5832	9.7044	11.6705	10.9312	10.3144	11.5657	12.2666	954	0
TCGA.C8.A1HJ	Basal	7.4369	12.1422	11.4505	7.4763	15.129	9.7105	2.0536	7.3121	10.5135	4.1824	11.1099	11.4391	9.8184	5.61	11.6041	9.6807	8.9817	7.4074	8.9524	10.8227	13.0949	12.1325	11.3994	11.9788	12.2063	NA	NA
TCGA.OK.A5Q2	NA	7.1815	11.6406	10.646	7.3753	14.5836	11.2692	2.825	8.0845	11.0116	0.8161	10.3062	10.4227	10.1583	6.7448	9.4878	10.332	7.3457	7.684	10.4983	9.4012	12.0358	11.4769	9.8843	11.0358	9.9906	64	0
TCGA.BH.A0BW	Basal	6.6925	12.6844	13.9729	10.6129	14.8296	11.4958	1.3067	9.1196	9.7954	0.4526	10.7153	10.0682	9.0219	7.7898	11.6661	10.7744	6.7822	6.1499	7.5728	9.8558	11.8966	11.3717	9.0197	11.322	12.5055	2371	0
TCGA.BH.A8G0	NA	7.9147	11.9426	11.6582	7.8082	14.0686	11.0924	4.0729	8.5659	10.9252	1.7648	9.0591	10.4583	11.0277	6.2341	9.445	10.1263	7.3999	7.6852	7.6057	9.3043	11.4143	11.1287	9.6842	10.4558	10.5372	662	0
TCGA.A7.A0DB	LumA	9.0037	12.1778	10.1157	8.1	14.7066	10.4653	1.3407	7.9925	11.0121	0.468	9.8112	9.8519	10.2952	5.7525	8.5403	11.1725	6.3414	7.8123	7.6457	9.4792	12.2814	11.2469	10.8315	11.5526	10.1671	1007	0
TCGA.AO.A03T	NA	8.4603	12.2582	10.0198	9.2785	15.7339	10.8574	6.9767	8.974	10.5054	1.0203	9.7013	10.1502	9.1447	7.5697	9.9637	9.667	5.6094	7.9441	6.8345	9.7852	11.822	11.8999	11.1684	11.3567	10.6583	2124	0
TCGA.AN.A0AT	Basal	5.8883	12.2824	11.6828	9.1274	16.0783	10.7595	3.8339	7.5837	11.1237	3.0368	10.9646	10.7215	9.7128	8.0296	9.4036	10.5103	7.4989	7.6822	10.323	11.7312	13.4638	12.0197	11.4475	11.5153	11.663	NA	NA
TCGA.B6.A1KC	LumB	7.2251	11.1566	12.1717	5.9022	16.0157	10.666	8.5456	7.7636	9.9626	0.4032	10.3434	10.056	8.3039	7.5844	9.3203	11.158	6.9294	6.9782	4.4134	10.2816	12.8572	9.9362	9.7134	12.2536	11.3628	1326	0
TCGA.AC.A3TN	LumA	9.3192	12.3112	8.3291	5.3444	14.2123	11.3325	3.0222	7.1946	11.9459	0.8073	9.4229	10.2081	8.1297	6.9636	8.3948	9.6028	7.2382	8.3104	11.3293	9.3543	12.1408	11.4666	10.2716	10.2825	9.6674	456	0
TCGA.AC.A2FG	LumA	8.8347	12.4025	11.7928	10.9265	14.2478	10.8723	0.6025	6.7166	10.3882	0.3324	9.7001	10.342	11.2459	5.532	9.0782	10.4677	7.1544	7.8064	11.107	9.7122	11.7326	11.3084	10.0834	11.1355	10.3894	1853	0
TCGA.A2.A25C	LumB	9.6793	11.41	10.6779	6.3691	14.9375	11.3679	0.5272	7.7133	9.858	1.0723	9.2614	11.1191	10.5974	6.2659	10.6172	11.3616	6.2477	7.7771	10.6101	9.1454	11.8141	11.8938	10.3247	11.5039	11.4021	523	0
TCGA.D8.A1X6	LumB	8.9547	11.9531	7.8252	4.1694	15.3436	10.8868	4.1774	8.6649	10.5196	0.3278	10.7351	10.0172	8.6194	7.5343	9.5919	12.2776	7.0869	7.83	8.9436	9.7837	12.699	11.5097	10.4442	11.3199	10.2643	541	0
TCGA.B6.A0IC	LumA	8.5855	11.7279	7.2442	6.0592	14.4017	11.4106	1.423	7.1907	10.5356	0	9.5704	10.1784	3.8365	6.1686	8.9368	11.0362	7.1932	7.6517	2.1253	9.4768	12.0763	11.5002	8.7418	10.7814	10.7698	1542	1
TCGA.AO.A1KQ	LumB	8.5038	12.4146	8.9057	4.9964	15.6501	11.3005	7.2032	8.1017	11.3997	1.3008	10.0414	10.6878	9.4931	9.2344	9.4281	10.6312	7.5054	7.8746	9.3772	10.2042	12.8483	12.2991	10.6192	11.2384	10.886	1882	0
TCGA.BH.A0B4	LumA	8.1701	11.8275	10.769	6.3987	15.2795	11.2953	4.4264	8.8745	11.0718	0	10.1338	9.9702	11.0751	7.1197	10.3874	9.8431	5.4358	8.0977	5.8744	9.7992	12.4909	12.5619	10.7216	11.2794	11.6999	1191	0
TCGA.EW.A1P3	LumA	9.864	12.3787	11.3524	7.2382	14.5874	10.8868	5.2399	7.9891	11.0993	1.0805	9.8237	10.765	9.6724	7.4123	9.3215	10.5241	7.5091	7.3895	7.3895	9.3063	11.7008	11.5843	11.1805	10.9865	10.0889	1611	0
TCGA.E9.A3QA	Basal	5.1789	12.6601	11.2787	9.7616	15.6507	11.3533	2.4233	9.2835	11.3275	2.6552	10.9908	10.6256	9.8184	7.2118	11.5139	9.7048	6.8544	7.6317	11.2258	10.5945	12.3706	10.6035	10.2624	10.5047	10.4419	918	0
TCGA.B6.A0I9	Her2	6.7171	11.7176	9.9333	5.8124	16.1713	12.8704	0.3991	7.2901	10.6786	1.1857	10.7339	10.1576	9.1061	6.3544	9.2098	10.9598	7.6474	6.8585	4.3976	9.5976	13.0813	12.0315	9.4633	11.4034	12.0323	362	1
TCGA.AN.A0XO	NA	8.4667	12.1939	12.14	5.1489	15.6063	10.5458	1.7111	6.8202	10.9938	0	10.0811	10.2303	9.8892	6.8604	8.4124	11.2083	7.447	7.5658	7.7936	10.5298	12.4544	11.2833	10.1553	11.941	10.0943	375	0
TCGA.AQ.A1H3	LumA	8.1003	11.9397	12.6132	8.1242	14.9621	10.4531	1.0853	8.0615	10.145	0.6424	9.9016	10.2784	10.3728	6.5307	9.7139	11.3467	6.899	7.2172	8.36	9.9806	11.5859	11.8016	10.1267	11.178	10.2531	989	0
TCGA.BH.A1EW	LumA	6.9323	12.665	11.7039	8.859	14.9616	10.5301	6.9153	7.6983	9.4336	1.0555	8.27	10.7293	10.2143	7.5414	10.8011	11.1216	6.8383	7.3749	8.6031	9.6582	11.9443	11.49	9.6658	10.8378	10.7445	1694	1
TCGA.GM.A3XG	LumA	7.9116	12.4297	11.0769	8.659	14.8146	11.216	2.0437	7.4211	11.5617	2.3685	8.8117	10.3472	9.9023	6.8877	8.8663	9.6763	7.1661	8.2882	3.8613	9.473	12.5083	11.8159	10.5401	10.6464	9.4481	1330	0
TCGA.AR.A0TU	Basal	7.3991	12.4983	13.3989	8.9042	14.9361	11.133	0.9554	7.6195	11.7615	2.1517	10.9237	9.5593	8.4145	7.2487	11.1599	9.9607	7.8268	8.2525	8.4214	11.6114	13.2694	11.7755	11.8809	11.0425	11.3492	709	0
TCGA.A2.A0T5	LumA	8.1313	12.6544	12.9579	6.2184	15.3816	10.4748	0.7904	6.9617	11.0694	0	10.2172	10.3812	11.1296	5.7328	8.2009	10.871	6.9318	8.0777	9.8226	10.5616	12.1418	12.0134	10.367	11.3039	10.1859	531	0
TCGA.D8.A1JN	LumA	9.1507	12.4548	7.101	5.9458	14.3474	11.0972	0	7.1279	10.3415	1.026	8.4133	10.379	6.1671	4.2633	8.0984	10.7384	7.3549	7.8293	9.4155	9.0682	11.65	10.9848	10.4502	11.737	10.4112	620	0
TCGA.A2.A0SX	Basal	5.962	12.2537	13.5648	6.7094	14.851	10.742	7.6283	8.4647	10.3964	0.4017	11.3947	10.3147	10.829	7.1906	11.9411	10.2378	7.1228	6.9124	9.4267	9.899	12.1543	11.6498	9.3802	10.5239	11.1708	1534	0
TCGA.A2.A0EV	LumA	9.1622	11.9615	10.4078	8.4297	15.1832	10.1838	2.8001	7.5082	10.8263	0	9.7887	10.2588	10.3164	7.6485	9.8635	11.0308	5.914	7.4745	5.9472	8.7835	12.4767	11.7181	10.4145	11.0921	10.5217	968	0
TCGA.A2.A3XY	Basal	6.1977	12.5552	12.8195	8.882	15.5226	11.8228	3.0655	8.2126	11.3389	0.6102	10.3127	10.9852	10.488	6.3579	10.4382	9.6098	6.8619	8.2691	9.8185	9.8673	11.8287	11.8642	10.0753	10.6764	10.7709	1093	1
TCGA.A2.A4S2	LumA	8.0361	11.6952	10.2869	7.5176	14.0347	12.1303	2.8878	8.1826	11.3195	0.9891	9.4116	9.9681	9.5565	5.9503	11.6012	11.4173	7.2727	7.4977	4.7067	9.4405	11.4003	11.1024	9.4986	10.6802	11.0397	643	0
TCGA.E9.A5FL	NA	6.8498	13.3652	11.2857	7.231	14.8435	11.2616	0.719	9.3158	12.4036	1.5548	10.7296	10.1157	10.0714	6.5823	10.08	8.7907	6.6415	7.9973	7.7813	9.112	11.7834	12.2497	10.8831	11.2474	12.3998	NA	NA
TCGA.BH.A0B9	Basal	5.7507	12.3027	12.9118	7.1689	15.153	11.0661	1.2287	7.8318	10.7215	1.2287	12.0783	10.8719	9.2433	6.9729	10.0448	10.8721	8.659	8.4552	8.3816	10.7605	13.4143	12.4161	11.2014	11.4376	11.5721	1572	0
TCGA.A7.A425	LumA	7.8405	12.1665	10.1033	7.8307	14.1419	12.2048	4.159	8.2522	11.2117	1.284	10.1901	10.7578	9.9883	7.0583	8.8294	10.6411	7.5179	8.1411	11.7534	9.0309	12.5544	11.684	10.2094	10.6106	10.4841	447	0
TCGA.B6.A0IG	LumA	9.2376	12.3617	9.7247	6.1745	15.0578	10.3161	1.1566	6.7623	11.3226	0.3866	10.5366	10.5131	9.6476	8.5187	9.7147	9.6795	6.9497	7.627	10.492	10.0578	12.9127	15.5849	10.7252	10.3105	9.9901	4456	1
TCGA.E2.A1L9	LumA	8.8153	12.2373	11.6856	6.153	14.6185	10.4275	3.8282	8.6711	9.907	0	8.9683	10.1872	11.3854	5.727	10.3267	10.8584	6.9402	7.425	9.4529	9.8167	11.56	11.3834	10.6211	10.9775	10.2843	598	0
TCGA.AQ.A1H2	LumA	9.435	11.3611	7.8816	5.2131	15.3836	11.5247	6.2047	8.551	10.9193	0.323	9.2701	9.2169	8.0099	6.342	10.7528	10.8539	7.0329	7.8552	7.6105	8.6985	12.2269	11.3103	9.4428	10.9694	11.7827	475	0
TCGA.C8.A3M8	LumB	9.3397	12.0562	10.6707	6.1986	15.3204	11.7355	9.1604	7.8155	11.2539	0.6166	11.3749	9.9958	8.87	8.0548	8.7231	10.6799	6.9689	7.8392	13.0185	8.9801	11.7866	11.3829	9.7405	12.0477	10.8389	394	0
TCGA.E2.A1LE	Her2	7.2128	13.0281	11.929	6.8229	14.795	11.0422	1.6402	8.4065	11.7611	0.5093	10.4988	10.2795	10.7995	5.7113	9.613	10.0561	6.4235	8.2244	9.6492	8.8468	12.0532	11.9599	10.3819	10.7651	10.8931	879	1
TCGA.AO.A0J8	NA	8.4948	12.2705	11.5358	7.8961	14.2357	10.9317	5.2603	8.2639	10.4906	0	9.5908	9.7334	9.9171	6.3803	9.7986	11.2674	6.6859	7.9902	4.4122	9.6066	11.8976	11.7589	10.3305	11.1362	9.9352	680	0
TCGA.EW.A1P8	Basal	6.253	12.2574	12.2671	5.4413	15.4216	11.5415	1.9514	8.3929	10.4811	1.8111	12.1306	11.0687	10.6974	7.2011	10.0843	9.5294	7.5498	7.918	2.3053	9.9553	13.193	11.1743	10.9517	11.2588	10.277	239	1
TCGA.D8.A27L	LumA	8.1371	11.9911	12.0947	7.0961	14.6133	10.9124	4.9568	7.9269	10.42	1.0587	9.6104	10.316	11.314	6.6053	9.3552	11.0439	7.1198	7.3976	8.7176	9.2629	11.7635	11.1056	9.7485	10.7071	10.9211	499	0
TCGA.E9.A1R2	LumA	6.7995	12.3597	10.4203	6.8	15.5573	11.533	1.5058	8.6147	10.6899	0	9.8201	10.4917	9.8661	7.2347	10.0339	10.1634	7.218	7.9596	5.6633	9.8528	11.7263	11.9998	10.1599	11.3971	11.1214	1063	0
TCGA.E9.A226	LumB	7.0902	11.72	11.9657	5.5645	14.9611	10.4495	1.5589	6.819	8.9747	0	8.9303	10.6416	10.8586	3.4445	10.91	10.9625	6.6568	6.6192	8.134	10.0132	11.7473	11.3709	9.6111	11.3972	11.0748	1048	1
TCGA.BH.A0BT	NA	10.9581	12.2174	10.7105	6.2261	15.5674	10.4519	2.2735	6.422	10.285	1.5447	9.3592	12.0522	9.1472	6.6247	10.6114	9.8136	7.2988	8.3798	6.2142	9.6627	12.2319	12.2421	11.0145	11.6941	9.2065	2365	0
TCGA.B6.A0WZ	LumA	10.3355	12.3478	10.5068	5.635	13.8322	10.3387	7.9908	7.0799	11.6097	1.2915	9.4263	10.3221	8.7025	6.6342	8.9195	10.0256	6.1095	7.1984	8.9011	9.2167	12.329	11.4163	11.0202	11.0569	9.1639	6292	0
TCGA.AC.A62V	NA	8.958	12.6558	8.1128	4.0676	15.4887	11.9275	0	7.1793	11.8369	0	11.8359	9.9211	7.9088	8.7412	7.9452	9.1976	6.1975	8.2862	4.3613	9.3489	13.1275	13.9638	10.6429	10.8059	9.1551	348	1
TCGA.E9.A245	LumA	8.6224	12.5772	9.2326	7.0826	15.2366	11.3933	11.6107	8.4955	11.1618	3.6196	9.5284	10.0655	9.1211	6.5184	9.0525	10.969	6.8931	7.7612	4.9373	9.7361	12.1695	11.3654	10.1638	11.1482	10.4487	NA	NA
TCGA.BH.A201	LumA	8.0676	12.2474	12.226	8.7712	14.8071	10.0394	2.8354	7.1668	10.2532	0.3861	9.5004	10.2644	10.8436	6.4685	10.5555	11.2109	7.0614	7.6159	7.5058	10.1727	12.3306	10.758	10.3084	11.4162	10.7926	856	0
TCGA.E9.A1R7	LumB	8.0045	11.0601	10.0171	6.3746	16.1361	11.7907	0	7.2475	10.9266	0.435	9.4895	10.3052	9.69	7.037	8.5304	11.5434	7.0924	7.1219	9.5408	10.193	11.8997	12.3299	9.4457	11.7788	11.9799	1467	0
TCGA.JL.A3YX	LumA	9.1702	12.3538	11.2456	6.2126	15.3275	11.1906	4.3364	7.4206	11.606	0.3892	10.2471	10.1798	8.8808	7.922	8.3205	10.9024	7.2344	7.7294	7.5311	10.2196	12.6731	11.7764	10.5447	10.9035	9.8703	352	0
TCGA.D8.A1XG	LumA	7.7629	11.5428	13.238	5.614	14.9885	11.154	10.4087	8.0861	10.45	0	9.6634	10.0281	9.8503	6.7861	9.7663	11.3015	7.1357	7.5709	0	9.9462	11.3858	10.9154	9.4366	11.449	11.114	448	0
TCGA.BH.A1FM	LumB	8.1035	11.7082	11.0455	5.5816	15.3116	10.5092	0	7.3329	8.3478	1.2927	9.9871	9.3938	10.8775	4.0227	9.5958	11.2152	6.6896	5.8647	9.1949	10.5624	12.7639	11.9252	10.8423	12.6884	12.7884	1388	1
TCGA.AR.A0TR	LumA	8.3325	11.9475	6.5135	8.8993	15.3001	11.5479	3.616	7.0355	10.63	0.3502	9.1241	10.5884	7.7009	6.247	6.8658	12.0978	6.8061	7.7068	3.1194	9.8741	12.4907	11.25	10.4843	11.7301	10.8819	160	1
TCGA.C8.A1HE	LumA	9.4053	11.6624	10.0387	7.3925	14.7918	11.0094	3.8743	7.7197	9.9787	0.6191	9.3736	9.9449	9.4985	5.8187	9.5103	11.2623	7.1814	7.4303	9.6017	8.9223	12.1144	11.2484	9.9833	11.3385	10.4917	375	0
TCGA.E2.A14O	LumB	9.895	12.5407	8.4875	4.7037	15.5065	10.2797	9.0202	8.8627	10.8062	0	10.4638	10.295	7.2471	8.0895	8.7531	10.6255	7.4375	7.4442	6.0073	9.1004	12.8974	11.9723	10.8613	11.6775	10.6818	1359	0
TCGA.A8.A0AB	NA	5.9322	11.865	11.6078	5.804	14.9553	10.6545	0	5.8115	10.0081	0.5998	10.8259	10.5352	9.5026	6.757	7.902	11.6561	7.5547	7.449	4.9006	10.2215	12.0566	11.2001	9.9678	11.8009	9.8675	518	0
TCGA.AR.A1AV	LumA	8.4573	12.0231	12.0844	5.0855	15.804	11.9045	6.6795	8.1894	10.1817	0.6584	9.924	10.4643	9.3894	6.5536	8.2821	12.0051	7.1243	7.5598	11.1247	8.9519	12.1802	11.6533	9.8857	11.254	9.8496	1864	0
TCGA.AN.A0FF	LumB	9.3868	12.1576	10.3629	6.3011	14.7969	11.6854	2.6213	8.2283	10.4403	0	10.0133	10.5956	10.144	6.9101	10.942	10.857	7.036	7.3901	9.5459	9.7459	11.859	11.6498	9.9248	10.9913	10.7982	172	0
TCGA.EW.A1IY	LumB	8.0734	12.2136	11.6596	7.4634	14.5337	9.9265	3.7459	7.7091	8.8458	1.573	9.0714	9.6122	11.0574	4.1274	10.1012	11.2854	6.6925	6.1721	8.1311	10.4311	11.9457	10.5956	10.3385	11.5325	11.0931	258	0
TCGA.AO.A0J4	NA	6.1415	12.7235	13.3486	8.3793	15.29	11.1268	2.5468	8.5565	10.6297	1.9276	11.0583	10.3302	12.5768	6.0677	10.3245	10.16	6.5475	7.9938	12.0475	9.9625	12.6936	11.4919	10.0881	11.2199	10.9172	1587	0
TCGA.E2.A1LB	Her2	9.3247	13.4881	11.3637	4.5446	14.8223	10.7993	0	6.9184	10.7096	1.6988	9.5201	9.7239	10.3759	5.6725	8.8918	10.2078	6.5268	7.6761	5.3088	9.0457	12.6495	12.0528	9.389	11.7472	11.2676	2306	0
TCGA.D8.A1XB	LumA	8.8586	11.9856	12.858	5.9989	14.8002	11.1258	6.0627	7.6365	10.4831	0.5432	9.8782	9.8513	11.2977	6.4999	8.5367	11.705	7.0167	7.7171	5.3818	9.5069	11.8967	10.9711	9.5106	11.1817	10.0126	552	0
TCGA.AO.A12H	NA	8.5047	12.3349	9.2727	4.9837	15.2033	11.5156	0.4103	8.5836	10.9416	0.4103	8.9998	10.2963	7.4	7.0183	8.875	10.7438	7.1512	7.4597	2.9222	9.7783	11.4596	11.2211	10.3117	11.1975	10.9464	1234	0
TCGA.BH.A1EU	LumA	7.6765	12.063	11.2605	9.6371	13.8216	10.7582	5.3301	8.4961	9.5741	1.4069	9.107	9.8752	11.6361	5.191	10.1593	11.6047	7.5629	7.2589	4.0249	9.4368	11.7864	10.5165	10.1792	11.2791	10.3147	1286	1
TCGA.BH.A18I	LumA	7.8961	11.9556	11.4775	7.1589	14.4659	11.6971	4.7065	7.7746	10.099	1.2238	10.0222	10.0895	10.9555	6.5353	10.1155	10.9275	6.9621	7.5949	7.739	9.948	11.9773	10.7576	10.0373	11.1533	10.1522	1093	0
TCGA.BH.A202	LumB	6.7575	12.7362	11.83	6.4665	15.1606	10.7296	6.3225	7.5467	10.1949	0.3343	11.4757	9.423	9.3385	6.8849	10.0294	11.3342	6.5322	7.4765	9.7362	10.3025	12.8641	11.3169	10.5974	12.5012	11.088	795	0
TCGA.E9.A248	Her2	6.2189	12.8109	12.1304	6.0456	15.172	11.2444	1.8439	8.2279	10.3333	1.7076	10.2605	10.2673	11.0129	6.9524	10.5306	10.8893	6.1416	7.118	7.9729	9.7144	12.069	11.5194	10.3231	11.8562	13.5145	59	0
TCGA.GM.A2DO	LumB	5.1477	12.0496	8.5356	6.6867	13.9967	11.3007	3.4386	9.0778	11.3505	2.7877	10.0593	10.6255	8.8337	7.5014	9.7667	10.2497	6.7691	7.7321	6.1272	9.4304	11.5578	11.1243	10.419	10.2274	9.5808	2596	0
TCGA.BH.A1F2	LumB	8.8717	11.0404	11.2332	8.6254	15.2849	10.0644	1.9075	6.8763	8.919	1.1524	9.5431	9.559	11.0969	4.475	9.8631	10.4363	6.6966	6.047	12.5793	10.3058	12.3845	11.2327	10.1894	11.9745	11.8286	959	1
TCGA.A7.A5ZW	LumA	8.262	12.0306	11.3953	7.1726	14.3662	10.5098	2.045	7.8631	10.8035	1.2265	9.0088	10.1424	11.5667	6.1554	9.6164	10.2016	6.678	7.852	4.5165	10.0285	11.8869	11.1065	10.3197	10.9058	10.4327	326	0
TCGA.A2.A25F	Basal	6.9004	12.0753	12.4047	8.4488	14.862	10.4405	4.1278	9.2189	10.3137	2.0322	10.423	9.9665	12.6552	5.5509	10.8246	10.5926	6.3597	7.1537	2.9916	10.5193	12.7897	10.869	10.2632	11.2659	11.5686	322	0
TCGA.BH.A1F5	LumA	9.0701	11.4788	10.0255	6.4916	14.2454	10.2367	2.6226	7.9121	8.7626	0.7965	8.5648	9.7455	9.4288	4.3694	9.0064	11.2881	7.5159	6.1941	6.4827	10.4364	11.9679	10.7647	9.815	11.6338	11.0911	2712	1
TCGA.BH.A1F8	LumB	8.1773	12.204	9.7838	5.5882	16.1524	10.6446	1.1093	8.8223	8.5897	1.4521	10.3525	9.9547	9.8328	6.3629	11.7631	11.6938	6.8672	6.7634	6.6722	9.8932	12.7219	11.2688	11.0443	12.4122	12.2525	763	1
TCGA.EW.A2FV	LumA	8.2215	12.2799	10.9243	8.7415	15.4501	11.0338	1.277	8.4048	10.4683	1.277	10.5599	10.4532	10.9852	5.9421	11.3776	10.2787	6.6101	7.3932	12.3958	9.781	12.5311	14.0061	10.0813	10.9432	12.5139	788	0
TCGA.BH.A5J0	NA	8.9431	12.5216	9.2806	6.3429	14.7168	10.8844	0.5493	8.6801	11.6894	0.9462	10.2474	10.1132	9.5796	6.3223	9.8727	9.4932	6.3834	8.0481	11.158	8.7376	12.7193	10.9904	10.1156	10.7522	9.8234	715	0
TCGA.B6.A0IN	LumB	8.495	12.6875	10.1195	7.608	16.2829	10.5835	2.3906	10.0155	11.1734	0.9584	9.2171	10.2938	9.5857	6.9058	8.983	9.9427	5.3931	7.9979	9.8388	9.6383	12.1208	13.0098	11.822	11.0079	10.9225	2573	1
TCGA.AR.A0U4	NA	7.1092	13.0191	13.2133	8.8448	15.6368	10.6861	6.9419	8.3592	11.9718	1.4423	11.046	11.0639	10.1416	5.9279	10.2373	9.7616	6.6078	7.1482	2.4504	10.4046	12.6376	12.3354	9.5028	12.081	11.4765	3261	0
TCGA.BH.A0GY	LumA	8.3923	12.1563	10.6136	7.0479	15.4766	10.8959	9.0858	7.8709	10.8508	0	9.8367	10.4419	9.9536	6.8237	9.9183	10.9058	6.2535	7.5623	8.0801	9.7525	12.655	11.5192	10.4512	11.3466	11.6177	923	0
TCGA.BH.A0BA	LumA	8.5425	12.0106	10.5754	8.3533	14.66	10.4892	0	6.8167	10.3076	1.4402	9.8576	10.084	10.6637	6.1432	8.7323	11.0459	7.6249	7.6497	8.6486	8.9359	12.5194	10.8423	10.3903	11.2432	12.2909	1132	0
TCGA.AO.A03P	NA	9.2038	11.9246	9.5956	7.2496	15.9009	10.3739	3.1177	7.3394	10.782	1.5866	10.2401	10.3468	8.0784	7.3358	9.3977	11.5128	7.2055	8.3659	7.0829	10.101	12.3268	11.5967	10.4147	11.4517	10.8631	2911	1
TCGA.BH.A18T	Basal	6.9119	12.8881	13.3192	4.8883	15.6624	12.5966	3.1828	6.9989	11.1175	1.1357	11.4424	10.5552	9.4365	6.8456	9.4077	10.1235	9.1702	7.369	7.6419	10.1636	12.895	11.9367	10.2004	11.8043	12.0085	224	1
TCGA.LL.A5YO	Her2	8.3845	12.7515	10.4725	5.6858	14.9912	10.8341	4.1757	9.7813	11.5588	1.0714	10.7332	10.3741	9.8421	6.4567	9.809	9.8002	6.4597	8.363	9.5401	10.7687	12.931	11.5163	10.4635	10.5364	10.2314	440	0
TCGA.BH.A0BZ	LumB	7.8948	13.0726	11.1283	5.866	15.6565	11.2989	0.3806	8.7493	10.865	0.3806	10.409	10.4939	11.0979	7.4318	10.0965	10.1837	6.2107	7.2589	7.987	10.0708	12.2554	11.9332	10.8083	11.0601	11.0958	2255	0
TCGA.AC.A3YI	NA	6.9923	12.1994	12.1204	8.5145	14.6804	11.1587	3.3149	7.7538	10.7596	0	8.6361	10.0576	10.716	6.3689	10.5246	9.9486	6.6362	7.9494	6.2115	10.2425	11.9852	10.8459	10.1715	10.7294	10.5907	707	0
TCGA.E2.A109	LumB	8.6836	12.125	10.6847	5.3019	15.6494	11.3086	5.2577	7.8169	10.3994	1.1581	11.2656	9.9776	9.5326	7.7835	9.8792	10.8167	7.7708	7.4125	10.6839	9.0616	12.354	10.9062	9.7976	11.7873	11.375	1417	0
TCGA.BH.A0HN	LumA	9.0909	11.9373	7.2363	3.3694	14.5737	11.251	7.0781	8.4492	11.3525	1.3036	9.3047	9.9875	7.0826	6.4767	7.8551	10.1794	7.2869	7.9973	11.0866	10.0273	12.086	11.2654	10.914	10.953	8.6383	516	0
TCGA.A2.A0SU	LumA	8.938	12.1286	11.4771	9.753	15.7688	11.3891	0.5165	6.5934	10.7603	1.1962	10.1307	10.3569	10.0687	6.6303	8.4937	10.7248	6.5005	6.841	9.3245	10.278	12.5041	12.2818	9.961	11.1876	10.6925	1662	0
TCGA.A7.A13F	LumB	8.9395	12.299	10.5197	5.9026	15.2663	10.2329	0	8.5824	10.7298	0.4871	11.6801	9.9503	9.2507	7.6847	8.7027	10.8439	6.5634	7.7646	10.4026	9.2852	12.3779	11.5419	10.1078	11.7153	8.5488	765	0
TCGA.AR.A1AU	LumA	6.8176	12.2466	12.6519	8.5255	14.9217	12.1146	2.1335	8.4021	10.858	0.4609	9.944	10.2224	10.8805	6.6396	9.2555	11.1026	6.9018	6.8881	7.3608	9.3732	11.8379	11.8487	9.5923	11.6558	10.6436	2868	0
TCGA.E2.A14R	Basal	5.3211	12.731	10.8407	8.649	14.4279	10.1944	1.5029	7.264	10.9045	0.5446	12.1655	9.6971	10.2107	7.3453	10.746	10.0583	7.5015	7.898	6.5907	10.448	13.3196	12.1781	11.175	11.2972	10.8008	1174	0
TCGA.A1.A0SO	NA	5.6805	12.7583	13.1205	4.9384	15.5227	10.2501	0	6.1935	10.5496	2.9047	12.5972	10.5283	8.406	7.5376	10.3723	10.1772	6.8364	7.8856	2.0855	10.3509	11.9581	12.8889	10.14	11.6365	12.0608	852	0
TCGA.A2.A0CY	LumB	6.4007	13.1953	10.0614	5.2125	15.1244	11.2645	0	7.2067	11.8764	3.7961	10.3571	10.8292	7.3996	5.8501	8.2197	8.941	7.0008	8.3476	10.4862	10.6345	12.6114	12.0791	10.946	11.1864	10.5858	1673	0
TCGA.EW.A2FR	Her2	8.1866	12.3923	12.729	5.7146	14.753	11.7031	0	8.0658	10.3711	0.678	9.9908	10.7761	11.7135	6.8766	9.3203	10.3447	6.6778	7.6166	11.1809	9.2784	12.344	11.6286	10.6736	11.5313	10.6482	1673	0
TCGA.BH.A0DD	LumB	8.5772	11.3829	11.2342	5.4262	15.2668	11.2331	10.442	7.0591	11.042	1.4598	11.403	10.201	9.8208	7.3065	10.4514	11.2289	7.0555	7.3025	3.0623	10.4391	13.0589	11.5061	10.009	11.4451	10.7374	2486	0
TCGA.AR.A2LL	NA	8.6133	11.6519	10.6264	5.272	15.299	11.6054	1.6627	8.6655	10.6451	0	10.4271	10.5958	8.8865	7.3634	8.9873	11.0796	7.5491	7.5295	6.3867	9.7921	11.9554	11.9877	9.5391	11.2161	10.7331	2012	0
TCGA.D8.A1XY	LumA	9.4626	11.5389	11.2192	7.4516	15.0063	10.8587	7.3627	7.5138	9.9533	0.412	8.0063	10.1893	10.5354	6.88	10.9805	11.5686	6.4471	7.5776	11.6764	9.7251	11.3521	11.4985	10.3285	11.1641	11.2749	503	0
TCGA.BH.A1FJ	LumB	9.1992	12.2768	12.1254	4.6624	14.425	10.8828	0	5.8165	10.1909	0.3479	10.985	9.9028	8.5791	7.1219	9.1467	10.9619	6.9476	7.4146	12.1144	9.6744	12.0655	10.7544	10.0086	11.7275	9.9365	1927	1
TCGA.E2.A1L7	LumB	6.0449	13.0073	9.6222	6.0022	15.1811	11.2945	10.9038	7.4328	11.1476	1.5563	11.7207	9.598	9.9619	7.3369	10.3705	10.746	6.5866	6.9684	3.4842	10.0983	12.3896	11.453	9.5028	11.1457	11.2779	1836	0
TCGA.AN.A04C	NA	7.3146	12.6406	12.8738	5.3711	15.2327	10.8349	2.7387	8.1299	10.3547	1.6452	10.5679	10.652	8.9168	8.7141	7.8373	9.5631	6.6836	8.6246	8.8059	10.18	12.7868	12.0976	10.7739	11.9773	10.2961	54	0
TCGA.A2.A0EP	LumA	7.1279	12.1373	10.583	8.2351	14.0914	11.3154	4.5602	9.5479	11.2536	1.9964	9.6246	10.4997	11.8003	5.6549	9.7568	9.4291	6.9417	7.0756	10.1002	9.1998	12.5344	10.9487	9.8753	10.2943	10.6835	3603	0
TCGA.A8.A08P	LumB	8.216	12.0808	9.8658	5.674	15.4158	10.6648	4.2243	8.4661	10.7632	0	9.9661	9.7365	11.1368	7.632	10.2519	10.5383	7.0097	7.5513	8.892	10.1293	12.3421	11.4648	10.2055	11.0231	11.9155	943	0
TCGA.A8.A09N	LumB	8.2031	12.0129	9.8727	5.0479	15.9128	11.6801	0.5225	7.3323	10.0146	0.5225	10.6304	10.2021	9.2946	6.4624	8.9411	11.5057	6.8927	6.8767	6.1985	9.5156	13.2831	10.7875	10.4749	11.8322	11.9439	31	0
TCGA.AR.A2LQ	NA	6.0353	12.1681	13.4736	9.3879	14.2547	11.1196	0	7.3646	10.8813	0	9.1106	10.0146	12.1994	4.9439	9.6984	10.758	6.6538	7.3564	9.631	9.3936	11.9378	11.0576	9.4756	11.0525	10.9822	1233	0
TCGA.E9.A5UP	LumA	8.0454	11.4343	10.1329	3.5795	14.9661	11.0026	0	8.9112	11.1399	0	8.865	9.9001	6.4724	6.2456	10.1808	11.1232	7.1208	7.9577	12.4895	9.2631	11.7053	12.5664	9.5114	10.6738	9.9364	803	0

## Sheet: TCGA BRCA testing data
attrib_name	PAM50	ACOT4	DDOST	FAT1	FGF2	HSP90AB1	INPPL1	INSM1	IRF5	MAP2K2	MCF2	MCM2	PBX2	PDGFRA	PSMC3IP	PLSCR1	RAD50	RAD52	RPUSD2	S100P	SEH1L	SLC25A5	SMARCD2	SSBP1	TOMM70A	TXNRD1	overall_survival	status
TCGA.3C.AALK	NA	8.7813	12.3127	11.8556	6.194	15.013	11.155	4.466	7.7641	11.3649	0.8699	10.0043	10.5697	10.6553	6.0818	9.3907	9.8317	6.7951	7.39	8.7316	9.2605	12.1735	12.2938	9.8362	10.6182	10.1746	1448	0
TCGA.5L.AAT0	NA	7.551	12.3843	10.2855	6.5257	14.5718	11.4183	1.9756	7.9054	11.0141	0.6659	9.8704	10.5634	10.744	6.8084	9.077	10.238	6.7828	8.0239	4.8945	9.395	11.9241	10.6124	9.9767	10.5884	9.8208	1477	0
TCGA.5T.A9QA	NA	8.4068	12.0438	10.027	2.1218	14.9012	12.1305	5.1716	7.3313	11.148	0	10.6704	10.5547	4.8062	7.4614	9.2372	10.1079	7.1359	8.4223	14.2133	9.9897	11.4304	11.9703	9.514	11.0389	10.6399	303	0
TCGA.A1.A0SD	LumA	8.5114	11.5841	12.036	7.9103	15.2982	11.8002	3.2632	7.8698	9.9985	0.4123	9.6118	10.3356	10.4772	6.077	10.3437	10.7218	7.0004	7.4404	9.6497	9.0216	11.8869	10.7957	10.0489	11.4038	10.2195	437	0
TCGA.A1.A0SI	LumB	8.3391	12.578	10.9646	6.9538	14.4809	10.9103	1.8673	7.5805	10.6682	0.3722	12.1904	9.7635	11.2172	6.0589	10.5613	10.1196	5.9523	7.1374	9.487	9.116	12.6361	11.544	10.0938	11.7417	10.3059	635	0
TCGA.A1.A0SJ	LumA	8.2715	12.5872	11.9774	8.6126	15.1305	10.3503	1.6757	7.8906	10.3106	1.9732	9.7898	9.8303	11.3255	5.6062	9.5419	10.6754	6.9951	7.4371	9.918	9.5685	12.1964	14.2768	9.8709	11.3495	11.5599	416	0
TCGA.A1.A0SK	Basal	6.3463	12.026	11.351	7.6952	14.7259	11.914	10.2358	6.6433	11.3736	1.365	12.8373	9.484	8.802	8.8534	8.9628	9.2928	8.9399	7.1356	4.221	10.9095	13.8329	10.9695	10.3151	11.6676	13.0647	967	1
TCGA.A1.A0SN	LumB	8.4283	12.4626	11.0098	5.9508	14.9012	12.1408	4.0351	7.9725	11.0178	0	10.6592	10.4137	10.1508	5.6434	8.9388	11.2092	6.3544	8.007	11.6827	9.8081	13.0827	15.3654	9.5003	11.1905	13.0164	1196	0
TCGA.A1.A0SP	Basal	6.1581	12.8359	13.6762	8.9081	14.4029	11.6572	7.8068	8.3619	11.4536	1.0666	12.703	9.3748	9.457	9.2548	9.7746	9.9142	8.561	7.7663	9.668	10.977	12.8286	11.0747	10.6396	11.1497	11.4804	584	0
TCGA.A2.A04Q	Basal	6.9811	12.7257	12.7865	8.3142	14.6577	10.578	2.4926	9.0151	10.531	1.5501	10.5227	10.6114	10.5135	6.3669	10.2923	9.7039	6.9319	5.9881	2.5882	10.0116	11.9242	11.8855	10.5208	11.17	11.1916	2385	0
TCGA.A2.A04R	LumB	8.8955	11.6397	10.0937	6.1825	15.6797	11.2177	0	8.3515	11.0197	1.4911	10.9514	10.3558	9.4995	7.1466	8.9714	10.4836	6.4936	7.2756	9.1309	10.209	11.8874	12.2509	9.8785	11.7631	9.3267	3709	0
TCGA.A2.A04T	Basal	6.1334	13.1582	13.8642	5.7512	15.8791	10.9769	2.789	8.0514	10.2854	2.1627	11.286	11.0378	10.3483	7.0361	8.6927	10.0098	8.015	7.6779	8.9137	11.0188	13.274	11.7112	10.4112	10.8376	11.336	2246	0
TCGA.A2.A04V	LumA	7.6425	12.2835	11.613	5.4583	15.1581	10.1195	5.155	7.1535	10.7563	0.8598	10.0324	10.8224	10.7434	7.5055	8.774	10.07	6.4082	7.6688	4.9798	9.8095	11.5112	11.3189	10.4563	10.938	9.0736	1920	1
TCGA.A2.A04X	Her2	9.648	12.4974	9.6724	5.4437	15.1917	11.0706	1.9574	8.0032	10.4932	1.4866	10.5119	10.6432	8.8071	6.7186	10.2621	10.4593	6.3466	7.8312	13.029	8.8552	12.0589	10.6962	9.926	11.2056	10.4787	1686	0
TCGA.A2.A0CK	LumA	7.268	12.2012	9.3114	7.726	14.6641	12.3808	4.5868	7.6218	11.3942	0.4895	10.0657	10.6466	10.0536	7.17	9.2676	9.6978	7.3127	8.1156	5.6406	9.8565	11.6139	11.4832	9.9701	10.6458	10.0771	4159	0
TCGA.A2.A0CL	NA	6.9762	11.9743	10.6739	8.0192	14.4382	10.5803	5.4714	8.8807	10.4998	1.9874	10.9542	10.4295	11.8887	6.9746	11.0448	10.251	6.9297	7.332	3.5544	9.4181	12.2285	11.0977	9.7967	10.6471	10.9774	3015	0
TCGA.A2.A0CP	LumA	9.3138	12.5002	11.6115	8.2863	14.8869	10.576	8.1591	7.4028	11.1156	0	9.2228	10.2749	11.0555	6.325	9.0693	9.9931	6.6848	8.0539	6.526	9.822	11.9142	11.7933	10.6221	10.8519	9.8631	2813	0
TCGA.A2.A0CR	LumA	8.2594	12.5222	8.9291	7.9312	14.5002	10.9928	3.7533	9.0025	12.3138	2.1912	10.2077	10.789	10.2937	6.914	9.4423	8.9759	6.4512	8.4145	7.6841	9.0924	12.096	11.4664	10.6486	10.303	9.3178	3283	0
TCGA.A2.A0CS	LumA	9.4429	11.8371	10.0884	5.4067	14.5071	10.4035	2.8072	7.749	11.1473	0.9433	9.687	9.8588	10.1745	6.7694	9.7276	10.4787	6.5437	7.8126	9.3419	9.5978	12.12	11.857	10.4885	11.2015	10.1066	2348	1
TCGA.A2.A0CV	LumA	8.9932	12.1783	11.499	7.3963	14.5958	10.6299	1.2825	7.4171	10.8728	0.6536	9.4527	10.0887	10.7867	5.304	9.8698	10.8629	7.2429	7.8665	6.5521	9.5866	12.3172	11.0447	10.5018	11.0882	10.1387	3011	0
TCGA.A2.A0D0	Basal	6.8569	13.7018	10.6099	8.6204	15.2099	10.6833	0.4976	8.6457	11.6652	0.8669	12.1311	10.2088	6.8081	7.8749	11.3812	9.3418	7.318	7.916	5.3702	10.5462	12.4686	11.8381	12.1326	11.7384	10.6544	2048	0
TCGA.A2.A0D1	NA	7.2846	13.3924	12.5007	3.3513	15.7896	11.9508	8.0736	5.97	12.0164	0	10.3856	10.2787	8.6664	7.4618	7.1137	10.1477	7.0484	7.8795	5.1446	9.8626	12.2384	12.2304	10.4961	10.6974	9.7376	1051	0
TCGA.A2.A0EM	LumA	8.3214	11.9984	11.8692	6.2577	14.569	10.5626	4.0858	6.5768	10.2991	0	10.2728	9.7882	9.6047	6.0407	9.6029	10.4724	6.2996	7.7056	5.613	10.7366	11.8363	11.309	10.1219	11.0207	10.409	3094	0
TCGA.A2.A0EQ	Her2	4.9274	12.3474	11.9951	5.7542	15.1254	12.4738	7.8777	8.1503	11.0294	1.6194	10.678	10.3379	9.456	7.3082	9.7099	9.2758	6.4804	6.8401	2.3632	10.343	13.0346	11.7924	10.6376	11.1505	11.1138	2426	0
TCGA.A2.A0ER	LumA	9.1931	12.1087	11.1482	8.8504	14.8931	10.1427	0.3801	7.1714	10.3431	4.1354	10.327	9.7307	8.9187	7.307	9.1909	10.856	6.5095	6.7944	5.3174	9.8668	12.3477	11.1819	9.9207	11.3933	10.9182	2263	0
TCGA.A2.A0ES	LumA	7.5072	12.2138	12.5449	9.5167	14.4535	10.5927	5.0093	7.1287	10.3895	1.3138	8.4536	10.2652	11.3491	5.4464	9.8859	10.735	7.0581	7.3119	4.9236	9.5528	11.6459	11.3302	9.7691	10.8961	10.409	2190	0
TCGA.A2.A0EU	LumA	8.2749	11.5959	10.0002	6.4017	14.6634	10.7293	0.4826	8.1186	10.7814	2.8792	10.2266	9.5446	8.63	7.5392	9.612	10.9922	7.0587	7.2924	8.6706	9.4296	13.0524	10.8081	10.0834	11.3167	11.304	1043	0
TCGA.A2.A0ST	Basal	5.612	12.263	13.3385	8.4768	15.0684	10.5988	3.834	8.817	10.9716	1.8345	10.3267	10.586	10.6401	5.8699	11.0226	10.1791	6.5519	7.7645	6.6596	9.8738	12.8367	11.8924	10.5519	10.7245	10.4824	3017	0
TCGA.A2.A0SY	LumA	7.9483	12.2699	10.6541	7.4455	14.6086	10.9788	3.9341	7.5714	11.2111	0.7629	10.1854	10.2757	10.9307	5.0423	9.2042	10.7161	6.266	7.1367	4.1758	9.5205	12.534	11.0297	10.1875	11.0558	10.3177	1347	0
TCGA.A2.A0T0	Basal	4.8668	11.6646	11.6464	5.1537	14.9257	10.1101	0.7271	7.9659	11.5831	3.6401	10.9407	10.0547	10.0065	6.9753	11.1066	9.9202	5.7391	7.9411	10.8507	11.0075	14.1768	12.3762	11.2973	12.0753	10.3317	533	0
TCGA.A2.A0T1	Her2	7.5393	12.5677	12.2786	6.0803	14.7489	11.1118	1.9987	8.9996	10.6699	0.8066	11.13	9.5174	11.5	6.3954	9.6817	10.0992	6.0481	7.7967	10.4847	9.5415	12.1455	12.3034	9.9716	10.7725	11.4842	521	0
TCGA.A2.A0T2	Basal	7.684	13.1991	11.3442	5.2157	15.9849	9.9189	0.9197	9.431	10.7412	1.225	10.0677	10.7695	9.0445	7.0155	9.6276	10.0109	5.2311	7.8039	10.3365	10.6173	11.9877	11.7079	11.583	11.6855	9.999	255	1
TCGA.A2.A0T3	LumB	8.5207	12.2634	12.841	6.8417	14.6433	10.3835	1.6725	8.419	11.9652	0.3923	11.2604	9.4656	9.4354	6.6256	9.7754	11.0095	6.6761	7.7757	11.0363	9.5298	11.7118	12.5011	10.5209	11.7692	10.1391	1516	0
TCGA.A2.A0T4	LumA	8.1175	11.8248	11.2865	7.7227	14.5015	11.7621	7.1748	8.3788	10.8519	0.5734	10.5207	9.7579	10.4942	6.9391	10.0925	10.5197	6.7598	7.4531	8.9018	9.1136	12.216	11.2794	10.3569	11.3779	10.8697	624	0
TCGA.A2.A0T6	LumA	8.3243	11.9497	13.6695	7.4583	14.2911	10.8525	6.6373	7.8727	10.7069	0.6822	9.1385	10.2243	11.6274	5.5231	9.5012	11.1088	6.5974	7.2407	2.618	9.3788	11.6572	10.7521	9.7311	11.0365	10.2568	575	0
TCGA.A2.A0YE	Basal	5.928	12.8994	12.6549	8.3219	15.5801	12.3249	1.8217	9.3532	9.6111	2.0596	10.8782	11.4997	15.3295	7.0759	10.5711	10.1902	8.1079	7.2311	8.1939	9.2955	12.7006	11.614	10.2455	10.724	10.634	554	0
TCGA.A2.A0YH	LumB	9.2078	11.9826	11.5033	5.9653	14.9908	10.9725	6.6384	8.9131	10.5558	2.9524	10.648	10.2358	10.5324	6.2913	11.3133	10.5547	7.0199	7.9454	9.9597	10.0614	12.5538	11.2671	11.6116	11.5511	11.0781	659	0
TCGA.A2.A0YI	LumA	7.7427	11.5037	10.4995	7.9543	14.5652	11.9005	0.6747	8.5663	9.9864	1.881	8.7211	9.9214	10.3625	5.3042	9.7685	10.7936	6.7272	7.5903	8.8664	9.2953	12.3904	10.692	10.1231	11.2703	10.4606	1505	0
TCGA.A2.A0YJ	Basal	6.5571	12.4479	13.781	9.5032	17.4443	11.3079	2.0891	7.2703	10.3782	0	10.4383	10.0603	9.4016	5.5905	9.0283	10.0331	6.2375	7.7262	11.048	10.9366	11.7844	10.7354	10.0718	11.3603	11.4909	566	0
TCGA.A2.A0YK	NA	7.6231	11.94	11.9036	9.0267	14.2516	10.5096	4.5029	8.2257	10.3171	1.9597	9.5524	10.1796	11.4993	5.2845	9.9607	10.6891	7.115	7.2271	8.5164	9.3988	12.033	11.2222	9.6432	10.946	11.1268	588	0
TCGA.A2.A0YT	LumB	8.4479	12.5435	9.6181	7.12	16.2221	11.0763	0	7.7365	10.5251	0.6224	10.8033	10.2011	9.9393	6.7403	9.9874	11.2949	6.9881	7.2661	9.3138	9.9866	12.4979	12.2184	9.5356	11.6981	11.9053	723	1
TCGA.A2.A1FW	LumB	7.6143	11.567	12.1376	7.5286	15.4624	10.4682	0.6721	6.7325	9.6477	0.6721	10.3423	9.6343	10.67	5.736	9.7032	11.4279	7.1	6.6063	5.7892	9.684	11.9244	12.5406	9.037	11.3498	11.9451	528	0
TCGA.A2.A1FX	LumB	8.6638	11.8596	10.9672	6.4982	15.6739	12.3492	7.829	8.536	10.4875	0	11.1328	10.7952	9.8828	7.6181	10.0975	11.16	7.134	7.7907	2.2604	9.5461	12.2758	11.3227	9.9906	11.4724	10.6456	1847	0
TCGA.A2.A1G0	LumA	9.3294	11.9833	11.65	8.0475	15.1809	10.9947	6.8339	7.7034	9.4858	0.99	8.8657	10.2104	11.177	6.1235	8.9819	11.6959	7.0483	6.8709	6.3782	9.5152	11.4193	11.9433	9.9496	11.2342	10.5774	616	0
TCGA.A2.A1G4	LumB	6.4974	12.0925	11.5163	6.0828	15.172	11.2122	10.7085	7.8307	10.3303	0.3495	11.0102	10.3062	8.6352	7.4683	9.36	11.2968	6.9271	7.579	1.6747	9.4661	12.1306	11.3996	10.2701	11.3551	10.9619	595	0
TCGA.A2.A259	LumA	7.954	12.0844	11.9305	8.9978	15.0605	10.4918	1.5192	7.7503	10.2969	1.3535	9.1483	9.8627	10.1463	5.4241	10.3638	10.9258	6.4249	7.547	7.2167	10.3139	12.1635	11.1557	9.9296	11.2803	11.1196	1596	0
TCGA.A2.A25A	NA	8.2218	12.1472	11.6556	9.326	14.4332	10.7221	6.4772	7.3718	10.3617	1.238	9.6081	10.5495	11.8463	5.7619	10.3502	10.3738	7.0628	7.3277	8.3939	9.6804	12.0514	10.9388	10.154	10.8925	10.3681	3276	0
TCGA.A2.A25D	LumA	8.4123	11.9671	11.0986	6.8409	15.7245	11.0731	2.0167	8.0029	10.4296	1.3353	10.7142	10.0384	8.5913	6.7807	10.6938	10.5377	6.7752	7.4577	5.0271	9.3542	13.616	11.6339	10.4681	11.1279	10.7568	552	0
TCGA.A2.A3KC	LumA	7.4685	11.611	11.2333	8.3954	14.4984	12.4901	0	8.4112	10.6321	0.4384	9.9191	10.6211	11.3377	6.3727	9.5545	9.9822	7.3005	7.4274	9.5948	9.4623	11.5563	11.1422	9.7057	11.0177	10.4602	1102	0
TCGA.A2.A3KD	LumA	8.9623	12.6791	12.2648	7.201	14.7259	11.8325	7.2666	7.2583	10.9145	0.3746	9.3469	10.0381	10.6733	5.3915	9.2406	10.6744	6.7749	7.4068	3.7176	9.4786	11.9867	11.4716	9.4048	11.038	10.6676	1206	0
TCGA.A2.A3XS	Basal	6.1416	13.46	12.0196	5.9352	15.2065	11.2853	1.9836	9.3246	11.3026	2.0986	11.2499	10.6469	9.4951	7.7877	10.2177	8.963	7.5173	7.7529	9.8814	10.2013	12.9587	11.65	10.5558	11.3904	10.6843	1032	1
TCGA.A2.A3XV	Her2	9.5101	13.089	6.9086	2.9515	15.5734	10.8574	0.5161	7.202	12.5822	0	9.4457	9.8095	8.2918	8.521	6.9392	9.716	7.1107	8.9021	12.3863	9.5545	13.2121	12.9836	11.2407	11.7426	9.927	996	0
TCGA.A2.A3XW	NA	7.2169	12.4211	10.0844	5.6346	14.3278	11.0167	1.2735	8.9584	12.3912	0	10.0611	10.4369	9.7466	7.32	9.5959	8.5406	6.8379	8.7546	8.7234	9.0928	12.9014	12.2616	9.9875	10.0447	9.8441	1712	0
TCGA.A2.A3XX	Basal	7.4149	13.5008	11.9628	5.1197	17.746	10.5682	2.3541	7.9961	11.0501	1.6118	11.0636	10.8507	9.2992	8.1328	9.4115	9.5478	6.3854	8.3619	11.1048	10.5148	12.7521	11.8904	10.442	10.779	10.6797	1439	1
TCGA.A2.A3XZ	Her2	7.5502	13.4585	12.2546	5.7694	14.956	12.1614	3.4126	8.4866	10.7618	1.0242	10.09	10.8199	9.0082	6.895	8.9627	9.8127	7.055	8.216	10.4065	9.3547	12.8339	12.703	10.1959	10.5593	10.6733	1532	0
TCGA.A2.A4RW	LumA	5.2451	12.1191	11.1344	6.8976	14.8151	11.9748	4.3907	7.3667	11.1258	1.4936	9.3812	10.6127	10.5018	6.4748	9.264	9.5643	7.2338	7.5916	8.3301	9.5666	12.2164	11.3826	9.6943	10.7493	10.458	222	0
TCGA.A2.A4RX	Basal	6.5682	12.4176	13.189	9.2629	14.3677	11.2446	2.8681	6.9818	10.8605	1.1765	11.6837	10.1726	10.5527	6.9355	10.4563	10.6605	6.1614	7.8713	8.5225	10.1843	12.8874	10.6582	9.0946	10.9094	9.6952	742	0
TCGA.A2.A4S3	LumB	7.7011	12.368	11.9866	4.6707	15.2933	12.0531	4.716	9.0137	10.98	2.5463	11.4547	10.3833	8.8353	7.9013	10.0955	9.8333	7.7985	7.1708	7.9379	10.443	13.983	12.8237	10.3173	11.6317	11.0468	666	0
TCGA.A7.A0CG	LumA	7.541	12.2721	11.5798	9.9062	14.6237	10.4465	1.3617	7.0958	9.998	0.8358	9.3102	10.2541	11.4627	5.2604	9.1639	10.8808	6.6537	7.2965	10.4302	9.2668	12.4515	11.208	10.2184	11.3814	11.3311	1043	0
TCGA.A7.A0CJ	LumB	8.2905	12.3756	10.4782	4.4568	15.3585	11.6427	5.8482	7.2259	11.2768	0.8113	11.8963	11.2971	8.6087	6.9664	10.4446	10.8336	6.6151	7.2186	4.0086	11.5222	11.5735	12.6488	11.3081	12.401	10.4644	931	0
TCGA.A7.A0DA	Basal	4.8964	12.2968	12.7808	4.8171	15.2369	10.6499	0	8.8864	10.5904	0.4165	10.4331	9.9725	9.8942	6.127	9.9911	9.1815	6.2152	7.1956	10.592	10.308	11.4705	11.5898	10.5466	11.5685	10.7797	1085	0
TCGA.A7.A13D	Basal	6.088	13.0796	13.1584	5.9277	14.6881	10.7564	0.4918	8.9571	10.7008	2.4511	11.362	9.4029	9.4491	8.8978	9.9796	9.508	6.2812	7.3314	9.8668	10.6532	13.1495	12.1282	10.9484	11.3434	11.3264	965	0
TCGA.A7.A13G	LumA	9.0402	12.137	9.702	10.901	14.3019	11.0479	0.3438	6.8666	10.6097	0.3438	9.1302	10.0745	8.6328	6.0844	8.4455	11.1105	6.9969	7.3049	7.9588	9.1932	11.4658	11.3031	9.1772	10.8835	11.0047	718	0
TCGA.A7.A13H	LumA	8.0541	12.1176	10.6521	7.3792	14.4736	11.5333	2.7865	8.7339	11.0084	0	9.7304	10.5223	10.3539	5.92	9.6367	10.4222	7.692	8.0351	9.0429	9.278	11.7819	11.2133	9.4265	10.4614	10.9111	899	0
TCGA.A7.A26H	LumA	8.718	12.0561	12.6393	6.8999	14.9919	10.6644	4.0812	7.2471	10.2678	0.8345	10.5061	10.1799	10.9896	6.7346	9.5954	11.609	7.0423	7.0956	11.2117	9.5768	11.2704	11.3456	10.085	11.9718	10.6509	724	0
TCGA.A7.A26J	LumA	8.1405	11.9235	11.1754	6.712	15.6094	12.4514	4.249	7.9285	9.9295	0.8832	9.6662	10.7662	10.8743	6.8319	10.8734	11.9915	7.7886	7.1838	8.3278	9.8547	11.6136	11.8588	9.7115	11.4683	10.7935	627	0
TCGA.A7.A3IY	LumA	8.4978	12.9461	12.3523	7.6218	14.6387	11.0747	7.7676	8.9367	11.1978	1.4576	9.6385	10.335	9.6729	6.9983	10.8425	10.554	6.2761	8.0195	4.4335	9.8317	12.5573	11.2517	10.7633	10.7655	10.4298	345	0
TCGA.A7.A426	LumA	8.5012	12.0112	10.3112	8.4862	14.2848	11.553	5.7614	7.7168	11.2677	0	9.8351	10.5592	11.1716	5.9837	9.6517	9.9511	7.7301	7.6286	8.7096	9.3373	11.7546	11.6113	9.5646	10.3155	9.6557	364	0
TCGA.A7.A4SA	LumA	7.7958	11.6797	11.4401	7.6115	14.0997	11.7286	2.7041	8.7113	11.1967	1.0727	10.2225	9.9401	10.1688	6.1527	10.0605	10.065	6.7026	7.6046	8.4701	8.8745	12.2804	11.5651	10.3512	10.652	10.6584	454	0
TCGA.A7.A4SC	LumA	6.6289	11.9653	12.1464	7.9483	13.7313	11.9378	0	8.5618	10.9513	1.7247	9.5276	9.7505	10.3567	5.7026	9.176	10.9087	8.1785	6.8468	11.1913	9.2171	11.6402	11.3775	9.6403	11.4618	10.2117	446	0
TCGA.A7.A4SD	Basal	5.9702	13.4677	11.9128	6.3125	14.7293	11.0763	1.3176	9.14	10.575	2.1643	11.5662	10.0406	9.8104	6.2658	11.0528	9.9169	7.269	7.8477	6.8877	10.2132	12.9378	11.1111	9.925	10.97	10.4086	441	0
TCGA.A7.A4SF	Her2	7.9411	11.9466	8.1424	3.3954	16.0063	12.1078	1.9213	6.5391	10.6185	1.4182	10.7429	10.7823	9.1227	7.0481	8.1927	10.145	7.4916	7.6601	8.2625	8.329	12.7207	11.8135	10.1213	10.3852	11.3768	545	0
TCGA.A7.A56D	NA	8.3462	12.5332	8.5268	4.1349	14.7117	11.3105	3.7744	8.7035	12.2474	0	10.5343	10.5485	8.6634	7.7216	10.0495	8.3373	5.9944	8.1735	11.7661	8.5881	12.5519	13.1614	10.8833	11.0356	9.8044	448	0
TCGA.A7.A5ZX	LumA	7.967	12.0769	11.3772	9.2868	14.5858	10.942	3.5409	7.542	11.2873	0	8.568	10.204	11.6428	6.2042	9.0722	10.1536	7.3491	7.831	5.8241	9.357	11.6943	11.2311	9.8855	10.7959	9.8033	336	0
TCGA.A7.A6VX	NA	6.233	12.0338	11.0217	5.3514	15.273	11.1693	1.8375	8.095	10.561	0.8938	11.4824	10.0021	9.8859	6.8056	11.1658	10.1646	8.0583	7.4979	5.5516	8.7625	12.6891	10.6077	9.7912	10.6815	10.9422	317	0
TCGA.A8.A06P	LumA	9.2921	12.2058	11.7898	5.9976	14.9089	10.972	4.0757	7.8014	10.3422	0	9.5775	10.218	11.2099	6.4352	8.6182	10.1237	6.5371	7.5776	6.9839	9.5196	12.1337	11.4028	10.1893	11.0809	11.2065	396	0
TCGA.A8.A06Q	LumB	8.8152	12.8812	7.1974	3.9814	14.7789	11.6772	0	7.3144	10.2599	0.6333	10.4147	10.2104	8.1776	5.9632	7.9916	12.2925	6.8115	7.279	8.0647	10.0588	12.8092	11.7917	11.0711	12.1159	12.7417	31	0
TCGA.A8.A06R	LumB	8.0451	12.1249	10.8918	5.3808	15.2187	11.8261	1.2902	8.4973	10.4888	0	10.081	10.1298	10.7493	7.0245	10.2571	10.2626	9.4173	7.4289	10.329	9.799	12.2016	11.0381	10.6639	11.7202	12.0263	547	0
TCGA.A8.A06Z	LumB	8.4936	13.2294	8.5542	3.4969	15.0655	11.7664	9.9348	8.4102	10.5305	0	10.6072	9.2615	6.3626	7.5766	8.7315	11.6072	6.4658	7.2404	10.5826	10.3012	12.7095	11.7722	10.2275	11.7333	12.1199	31	0
TCGA.A8.A075	LumB	9.0008	12.2265	10.4491	4.7531	15.3542	11.4139	1.2834	7.5641	10.377	0.78	10.959	10.5849	10.4978	5.9547	9.375	10.53	6.4906	7.9078	10.3633	10.4304	12.0896	11.595	10.4623	11.3959	11.1393	518	0
TCGA.A8.A076	LumB	9.6445	12.1151	10.453	4.9524	15.6642	11.4213	4.4746	7.6057	10.3635	0.6764	10.7695	9.8208	10.6814	5.9266	10.3946	10.4165	6.5895	7.5024	10.8624	9.0892	11.7214	12.8163	9.9123	11.3737	11.0837	1642	0
TCGA.A8.A079	LumB	8.0806	12.0633	9.319	3.887	15.2777	10.5734	0.7465	8.6877	11.3433	0	11.6678	9.5846	8.9232	7.6002	8.8006	10.4655	6.8689	7.5445	7.3089	10.4174	12.7438	11.6519	9.9952	11.577	11.907	274	0
TCGA.A8.A07C	Basal	4.9812	12.5013	12.6307	7.6866	14.8837	9.719	1.7628	6.5518	10.4753	0.8463	11.0034	11.0218	10.2516	8.1152	10.0948	9.9611	7.2091	6.9984	6.8731	10.9916	12.0025	12.2918	10.6123	12.1194	12.5267	1034	0
TCGA.A8.A07E	LumA	7.8197	12.3899	11.7184	7.6166	14.7382	10.9846	3.7964	7.5837	10.5267	0.895	10.5932	9.9456	11.294	6.0719	9.6472	10.5774	6.4183	7.4879	9.8756	9.8345	12.7346	11.5164	10.0658	10.977	11.4889	608	0
TCGA.A8.A07F	LumA	9.0141	11.4648	12.8557	6.0422	15.1729	10.8647	4.7073	7.2612	10.1005	0	9.5418	10.5034	9.913	6.3327	8.9821	11.6769	7.1194	7.6383	4.6128	10.2316	12.2973	10.5392	9.9838	11.5447	10.0295	577	0
TCGA.A8.A07I	Her2	8.2095	12.1912	12.7055	5.1591	15.5525	12.4798	2.7512	7.4636	10.4253	0.5271	10.7314	10.7947	10.6805	5.9631	10.5215	11.2933	6.4931	7.3157	6.8481	9.3784	12.0234	11.4609	8.8999	11.3651	10.9809	426	0
TCGA.A8.A07J	LumA	7.9677	12.2964	10.7811	7.1596	15.3082	11.0847	6.8116	8.5365	10.3768	0.546	9.7113	9.8522	10.9908	5.1075	10.1791	10.7679	6.5675	7.5098	4.47	9.2787	12.1776	11.5101	9.9878	11.2834	10.5417	365	0
TCGA.A8.A07O	Basal	5.846	12.094	12.7408	4.5757	15.4469	10.9496	4.1736	6.445	10.5026	0.9238	11.8086	9.223	9.6564	7.472	9.6178	9.482	6.1309	8.9926	9.2417	11.0819	12.3245	11.4031	10.3562	11.7147	12.3331	304	0
TCGA.A8.A07R	Basal	7.5885	12.2111	12.2708	9.6998	15.4385	10.3016	1.1378	7.7641	10.305	0.3786	11.7727	10.3258	10.6579	7.3667	11.8375	9.8553	6.4352	7.51	10.0594	11.1375	13.7316	12.2278	11.3821	11.7815	12.8809	273	0
TCGA.A8.A07S	LumB	8.987	12.318	9.9416	4.4435	14.9975	10.9235	8.7075	7.225	10.2816	0	9.7971	10.1624	9.1187	6.6425	9.5977	11.1943	6.7696	7.2088	4.3514	10.0007	12.0813	11.639	10.0978	11.0818	10.3598	243	0
TCGA.A8.A07U	Basal	7.1596	12.5253	11.9029	7.2784	15.1333	10.972	2.632	8.9603	10.612	0	10.7786	10.4716	10.0712	5.5771	11.8895	10.2474	6.5327	7.0419	10.207	9.9195	12.7767	11.3503	10.4663	11.6213	11.017	760	0
TCGA.A8.A07Z	NA	8.3012	11.9966	8.8681	3.9786	15.0739	10.7905	0.9874	8.057	10.8917	2.6791	10.6568	10.093	7.7542	6.4892	10.2503	10.8241	6.7563	7.7918	6.4588	9.4895	12.8512	11.9161	10.2191	10.5216	10.2995	1371	0
TCGA.A8.A081	LumB	7.1546	12.3083	11.0181	5.2536	14.3098	10.3859	7.1334	6.8411	10.3761	0.6043	11.5067	10.09	9.0336	7.454	9.4983	10.1943	7.3305	7.4382	10.9423	9.3884	12.5629	11.8234	10.3579	11.9635	10.8861	NA	NA
TCGA.A8.A082	LumB	8.4749	11.8196	11.1076	4.1728	15.4166	10.6419	5.1293	8.1096	10.7819	2.3219	10.9103	10.2684	8.5856	7.487	9.072	10.2703	6.6917	7.5188	2.5361	9.4549	11.9791	11.5291	9.9935	10.935	10.151	549	0
TCGA.A8.A083	LumA	8.8752	12.1099	8.1277	4.0326	14.6015	10.6375	6.8195	6.4724	10.4829	0	8.6605	10.4116	6.3414	6.2378	10.201	11.5367	7.4277	7.7273	4.4789	9.0878	11.7132	11.6606	9.3012	11.0449	10.4293	NA	NA
TCGA.A8.A08H	NA	5.9022	12.7171	11.561	8.6115	14.4323	10.9683	0.5316	9.653	11.0635	0.5316	9.9164	10.1225	12.5411	7.0548	10.6186	10.6696	6.7949	7.3736	9.2725	9.535	12.7178	10.9852	10.1773	10.8531	11.3401	NA	NA
TCGA.A8.A08I	LumB	8.8289	13.0716	10.5636	6.0403	14.8963	11.1918	6.903	8.5622	9.8479	3.8755	10.9896	10.4237	8.0519	7.0989	10.4769	11.0189	6.7098	7.0081	4.1864	10.3913	12.4365	10.6789	9.5446	11.1048	11.0053	365	0
TCGA.A8.A08J	Her2	9.0121	12.0788	10.409	4.9514	15.3998	11.5709	5.6217	8.493	10.6189	0.7358	10.8423	10.4005	10.2299	6.5211	10.6078	10.8326	6.6278	7.6836	12.7685	9.2592	12.5082	11.9099	10.5076	11.2265	11.3362	1127	1
TCGA.A8.A08S	LumB	9.1285	11.2089	10.1475	4.5701	15.9805	10.8213	4.727	7.466	10.1759	0	10.4605	10.5254	9.3893	6.9067	11.5344	11.2452	7.5992	7.4791	11.8672	9.7423	12.6367	11.7045	9.6761	11.1495	12.4965	1004	0
TCGA.A8.A08T	LumA	8.0088	11.7107	12.799	5.677	14.56	10.9345	3.5828	7.508	10.5251	0	9.8331	9.7015	10.4523	5.9247	8.2312	10.9648	6.5776	7.7413	9.912	10.75	11.6574	11.1339	9.9985	11.0684	11.2111	3409	1
TCGA.A8.A08X	Her2	7.7183	12.5355	12.6057	5.5595	15.6474	10.6683	0	8.3323	10.7863	0.6786	10.211	9.81	10.9538	6.1077	9.7619	9.9142	5.9178	7.4575	8.3106	10.3569	12.7441	11.8511	10.0962	11.4869	10.7082	1308	0
TCGA.A8.A090	LumA	7.976	11.8224	10.8555	5.9906	15.1638	11.5961	3.0927	9.0335	10.162	0	10.302	9.7277	9.5722	7.5024	9.93	11.654	6.8747	7.2514	5.4936	9.4847	11.5676	11.2615	9.7493	11.8551	11.4257	NA	NA
TCGA.A8.A092	LumB	9.3621	12.0518	11.4037	4.8683	16.1047	10.6756	6.3141	7.6432	10.3234	0	11.2712	9.9201	9.181	7.9236	10.3121	10.9434	7.2078	7.4456	11.9107	9.8765	13.0506	12.093	10.1605	11.9725	11.3881	942	0
TCGA.A8.A093	LumA	8.5216	11.6686	10.2908	5.6476	14.8388	11.1227	8.716	6.0035	10.8447	0	10.1416	9.691	10.052	6.0548	8.3898	11.174	6.2652	7.2055	8.8682	9.785	12.1049	11.5391	10.3076	11.4221	9.0448	546	0
TCGA.A8.A094	Her2	7.7073	12.6203	10.2178	5.6296	15.0311	11.55	0.7001	7.7116	10.7387	1.1694	9.312	9.9528	10.2805	5.473	9.0138	10.2691	6.0706	7.6184	8.2682	9.4626	12.7602	10.8845	9.6825	11.1251	12.2342	NA	NA
TCGA.A8.A095	LumB	8.314	12.0653	10.1683	6.7568	14.3473	10.6926	0.7529	6.8161	10.3102	0	11.355	10.0884	10.0423	6.9118	9.2152	11.2573	7.1089	7.2225	9.3696	9.9633	12.6039	11.3402	10.4668	11.308	10.1554	1277	0
TCGA.A8.A096	LumB	8.2461	12.3281	13.1763	6.024	14.1471	10.7757	1.032	8.4726	10.6158	1.5265	10.036	10.034	10.5445	5.8709	9.9303	11.0237	6.6417	7.1312	9.9618	9.552	12.0518	10.8573	9.3643	11.0894	10.933	NA	NA
TCGA.A8.A097	LumA	8.0665	11.6844	11.7529	6.3708	15.1152	10.8722	5.9509	7.9682	10.5134	0.86	10.8143	10.2272	10.9427	8.0248	9.3378	11.5904	6.0607	7.9477	7.5288	9.813	12.1089	12.1133	9.7397	12.0933	11.3063	365	0
TCGA.A8.A099	LumA	8.1083	11.528	12.0455	4.5227	14.7901	11.2899	0.8468	7.7028	9.9749	0.6157	9.2317	9.5451	9.3246	5.9985	8.9396	11.4942	7.1904	7.5494	10.2618	9.9401	11.6631	10.6519	9.0217	11.6843	11.2628	304	0
TCGA.A8.A09D	LumA	7.4414	12.6789	11.3572	8.1368	15.2053	11.2704	0.4865	8.4356	10.4656	1.3806	9.8827	9.4167	11.1116	5.8979	9.6433	10.5209	6.0695	7.4937	5.6758	10.5221	12.5633	12.0899	10.0233	11.2591	10.4802	1522	0
TCGA.A8.A09E	NA	8.3882	12.1675	8.6541	5.4194	16.1136	9.8232	1.3506	9.6086	11.0192	0.8278	11.4868	10.1757	8.8294	7.2114	10.5944	10.9544	6.7595	8.3373	6.2876	9.4264	12.4513	11.5847	10.4408	11.9487	10.5544	1492	0
TCGA.A8.A09G	Her2	8.5497	13.3826	12.2416	6.0682	15.2039	11.3229	0	7.2672	10.1419	1.3394	10.3616	9.8511	9.6588	8.2821	8.6488	10.9705	5.6343	7.0175	11.5162	8.937	12.9936	11.7742	10.2893	11.4314	11.2829	NA	NA
TCGA.A8.A09I	LumB	7.8333	11.693	10.0428	5.0825	15.6829	11.8162	0.8488	7.8434	10.2497	2.9275	11.1463	9.9935	9.803	6.8639	10.8536	10.7896	6.8017	7.131	13.2415	9.8248	12.9626	13.1023	10.1055	11.3869	11.5171	1371	0
TCGA.A8.A09K	LumA	7.56	11.283	8.4951	5.3865	15.0708	10.7396	0.8825	7.5728	10.3459	1.1798	10.4241	9.5855	7.9023	6.6011	8.4849	10.9334	7.2757	7.4459	3.5292	9.7301	11.8675	13.1865	9.6923	11.3891	10.8296	912	0
TCGA.A8.A09Q	LumB	7.4568	12.0904	10.6917	5.6514	16.0839	11.0118	4.9586	8.3537	11.0842	0.7261	11.1453	9.8586	10.4494	6.5268	8.5716	10.5958	6.8399	7.1092	6.4703	10.0766	12.9022	11.674	9.478	12.5624	10.5672	761	0
TCGA.A8.A09R	LumB	7.6433	11.6259	11.2415	5.1707	15.4508	11.3284	3.612	8.606	10.6273	0	9.9037	9.7593	9.993	7.0103	9.507	11.3139	6.3455	7.5106	8.2196	9.6137	12.3899	11.8335	9.7962	11.5542	10.9415	273	0
TCGA.A8.A09V	LumA	7.9246	11.5013	12.4578	5.7556	14.3093	10.8471	0.8678	6.9434	9.5507	1.0703	9.7944	10.3886	10.5887	6.094	9.3057	11.2247	7.983	7.4172	7.0962	9.6646	10.7806	11.0307	9.3556	11.0317	9.983	457	0
TCGA.A8.A09W	LumB	8.3129	12.0876	11.8079	5.5565	15.2869	10.8308	0.5052	7.7724	10.5157	0	11.384	9.5352	10.8553	6.5561	10.0208	10.6442	5.4519	7.6421	13.0627	9.2304	13.2647	12.9341	9.6161	11.5746	11.8042	30	0
TCGA.A8.A09X	Her2	5.2419	12.2203	11.6765	4.8282	14.9104	10.419	0.8702	8.1121	10.7452	0.8702	9.9662	9.9281	10.2582	6.2608	9.3185	10.9508	7.4259	7.8985	12.0578	9.6249	13.8024	12.0565	10.9592	11.5351	11.9036	426	1
TCGA.A8.A09Z	LumB	7.8031	13.156	8.7252	5.2919	15.0457	11.2723	0	8.3587	11.318	0	9.2216	9.7578	8.0984	5.349	9.981	10.8101	6.4312	7.4348	7.632	8.3821	12.6092	10.934	9.8743	11.0608	11.2895	NA	NA
TCGA.A8.A0A1	LumA	8.1169	11.7273	11.7155	7.1312	13.8797	11.1863	0.5869	8.1732	10.4294	1.0029	9.9164	9.2164	9.852	6.012	9.2561	10.7986	6.6852	6.9424	10.1857	9.5841	11.789	10.977	9.3209	10.847	11.2418	365	0
TCGA.A8.A0A2	LumA	8.2108	11.63	10.5723	6.1472	14.964	11.1745	1.3074	7.4804	10.1755	0	9.1756	10.5106	9.7568	6.3424	8.7269	11.0632	7.8259	7.6254	7.369	9.3297	11.719	10.7523	9.5284	11.411	10.9918	579	0
TCGA.A8.A0A4	LumA	8.5283	13.298	11.8449	8.3393	14.5329	12.1364	4.6653	7.1762	10.9987	0	10.6823	10.3177	10.3661	6.3871	9.5889	11.6736	7.2606	8.0627	2.9124	9.5298	12.3441	11.1658	9.3776	11.457	10.613	396	0
TCGA.A8.A0A6	NA	7.0545	12.156	11.1393	8.2707	14.602	11.5712	6.2582	8.166	10.2804	1.0454	9.1323	10.0766	10.6164	5.975	9.6333	10.8761	6.9091	7.8238	12.017	9.5802	11.9608	11.1287	10.5529	11.563	11.0209	640	0
TCGA.A8.A0A9	LumA	7.6023	12.1014	10.3631	5.2339	15.1848	11.8047	4.3035	7.6473	11.1436	1.1188	10.0797	10.1771	10.0973	6.4875	9.7474	11.1111	7.2297	7.6929	8.7671	9.9952	12.2966	11.0743	9.738	11.1586	11.2987	822	0
TCGA.A8.A0AD	LumA	9.1283	11.7908	10.5064	6.1184	15.009	10.693	5.7591	7.8494	10.2216	0.9042	9.971	8.9208	9.3527	6.7197	9.4874	11.0994	6.8584	6.8584	9.4856	9.8275	12.029	11.0013	10.2347	11.4409	9.7552	1157	0
TCGA.AC.A23C	LumA	8.0537	12.0711	10.9842	6.7685	15.663	10.3398	2.7474	8.0667	10.0047	1.3242	9.8845	10.5352	10.0685	6.0352	9.4538	11.1597	7.02	7.2336	7.4401	9.2314	11.9287	11.9092	10.1892	11.3578	11.1494	585	0
TCGA.AC.A23E	LumA	8.255	12.3605	12.0302	6.6727	15.2771	10.6805	6.4715	7.4305	10.3514	0	9.301	10.2471	11.278	5.9815	9.623	11.2905	7.0089	6.8149	10.9172	9.7014	12.6689	11.1737	10.0803	11.2963	10.2274	698	0
TCGA.AC.A23H	Her2	6.8819	12.7638	11.7863	4.7732	15.6272	10.8349	0	7.1682	10.0498	0	10.9334	8.8635	9.4726	5.9294	9.194	10.3618	5.8686	6.7203	11.9476	9.3209	12.437	12.6007	10.5298	12.9284	11.1387	174	1
TCGA.AC.A2B8	LumA	8.7569	11.92	11.9753	8.0632	14.3272	10.6634	8.2291	7.761	10.3764	0.8122	9.6524	10.1331	10.9979	5.1544	9.0583	10.9258	7.412	7.2376	5.6109	9.6774	11.8128	10.9196	9.8417	10.8404	9.8496	677	0
TCGA.AC.A2BM	LumB	7.7076	11.6696	10.8524	5.787	15.1366	10.5826	1.025	8.8697	10.1668	0	10.5193	10.4387	8.9818	7.9606	10.207	11.6534	7.7475	7.7148	3.3667	9.9045	11.8715	10.9796	10.1415	11.6948	11.0641	3022	0
TCGA.AC.A2FE	LumA	7.1818	11.9066	10.473	7.3357	14.3584	11.7527	1.9203	8.2796	11.1567	1.162	9.3712	10.3922	9.326	5.5794	9.9114	10.5678	6.7803	7.6391	7.5104	9.7124	11.9974	11.0517	10.0887	10.8185	10.412	2636	1
TCGA.AC.A2FF	LumA	7.7686	12.5521	12.1946	9.0369	14.5134	10.4386	2.1836	7.7814	9.9989	1.1942	8.9316	10.5425	11.9965	5.4338	9.8915	11.0283	7.1306	7.4345	3.499	9.4582	12.4491	11.2314	10.0326	11.2488	10.6181	2759	0
TCGA.AC.A2FO	LumA	8.0337	11.968	9.9672	8.2039	14.4243	11.2115	5.7792	7.8051	10.4861	1.3514	8.8463	10.4042	11.4158	6.2258	10.0237	10.6539	7.4038	6.846	8.756	8.9541	11.4731	11.1658	9.835	10.9527	10.4617	2255	0
TCGA.AC.A2QH	Basal	4.731	13.477	15.048	8.5209	16.0111	11.3247	0.8674	6.8631	10.9377	2.7593	10.5144	11.2159	10.5922	7.5681	9.4982	9.7551	7.2545	8.2575	2.1035	10.5103	11.9212	11.7546	8.7773	10.8703	11.4345	1005	0
TCGA.AC.A2QI	LumA	7.8696	11.9339	11.0566	6.3713	14.1643	11.2585	2.2668	7.8239	11.0262	0	9.4648	10.089	9.9549	5.9361	9.1281	10.4156	6.7558	8.1208	9.2085	9.5456	12.0013	11.3071	9.716	10.602	10.4173	588	0
TCGA.AC.A3BB	LumA	8.889	12.0486	10.1041	7.77	14.2118	11.2816	4.7773	8.5237	11.5156	1.2915	9.5931	10.1318	10.314	6.1488	9.4263	10.1107	6.98	7.8553	7.7182	8.913	12.2269	11.3444	10.1554	10.7028	9.5181	987	0
TCGA.AC.A3EH	LumA	7.4751	11.0682	11.144	5.1283	14.9743	11.3729	1.2523	7.2512	11.202	0.4281	10.1669	10.5865	8.6588	6.6486	8.648	10.3813	6.7702	7.7544	9.0214	8.5935	12.4882	11.8611	9.8952	10.8547	9.5044	197	1
TCGA.AC.A3HN	LumA	8.1516	12.2853	11.4285	9.0425	14.378	11.084	5.5812	8.6072	10.9825	0.6104	9.7802	10.3833	10.9144	6.1047	9.5132	10.9985	6.8623	7.6235	6.8158	9.1049	11.9202	11.2987	9.8787	10.6942	10.3438	496	0
TCGA.AC.A3OD	LumA	6.8458	11.9407	10.7691	8.27	14.6957	12.186	2.9262	8.8957	11.6254	1.8482	10.4434	10.4585	10.2901	6.6402	10.675	10.8462	7.4901	7.0048	5.8975	10.0395	12.0698	11.0211	10.0648	11.7696	10.3495	451	0
TCGA.AC.A3QQ	LumA	8.8182	11.7959	8.7294	4.7302	14.5667	11.5555	4.3889	7.8388	12.1316	0	11.0149	10.0202	8.4174	7.9788	8.748	9.1205	6.9737	8.6148	13.5087	9.053	12.624	12.0522	10.536	10.2294	8.7957	734	0
TCGA.AC.A3W5	Her2	7.8895	12.6957	12.9637	6.4147	14.4964	11.9278	4.0911	8.6689	11.7266	0.4971	9.9239	10.5316	10.9648	5.8039	8.9997	9.701	6.9589	7.5143	11.092	8.8852	12.4187	11.059	9.911	10.6886	10.2466	504	0
TCGA.AC.A3W6	LumA	7.1203	12.377	10.3075	6.9062	14.0758	11.7736	1.629	8.9511	11.3983	0.8775	9.9006	10.2371	10.5324	6.7413	9.1363	9.7523	7.1116	7.6366	10.4949	8.8142	12.2681	10.6637	9.8763	10.3539	10.4481	602	0
TCGA.AC.A3W7	LumA	8.4368	12.2165	11.0537	7.304	13.856	11.8982	0.3782	7.3682	11.2493	0	9.6821	10.7097	9.9025	5.5198	8.5086	10.3158	7.1017	7.8262	12.0105	8.7006	12.1496	10.723	9.6399	10.3833	9.9988	471	0
TCGA.AC.A3YJ	NA	7.9752	12.5272	7.6071	4.3486	14.8716	11.5234	8.3784	9.351	11.5818	1.9564	8.5285	9.9819	6.2429	5.6569	8.5873	10.255	6.8845	8.0633	9.067	9.6069	13.181	11.5899	10.4851	10.5786	8.7808	754	0
TCGA.AC.A4ZE	NA	8.4762	10.983	9.1247	7.2794	14.769	10.4772	0	7.2155	10.8318	0.7421	10.8052	10.3772	9.7955	7.1475	8.7764	10.6076	7.7137	7.6944	11.4926	9.3503	11.9618	11.0401	9.5045	11.2348	9.5628	890	0
TCGA.AC.A5XS	LumA	8.394	11.9974	8.6623	7.9332	14.6221	10.9366	1.5151	8.7239	11.0309	0.5504	9.8188	10.6421	9.2093	6.4539	10.8687	10.2142	6.1991	8.3268	10.4519	9.8898	12.2188	11.135	10.9163	11.1254	10.3411	588	0
TCGA.AC.A5XU	NA	6.4609	11.9631	10.228	5.5052	16.308	10.8727	11.4438	8.4518	11.5509	0.8299	9.8143	10.211	9.6446	7.162	9.0608	10.6749	6.9435	7.6638	5.5022	9.0671	12.4445	11.0651	9.8937	11.5029	9.7616	455	0
TCGA.AC.A62X	NA	4.8528	12.2068	10.2315	7.9645	16.1713	10.6557	4.6994	8.0744	11.1127	1.6238	11.5381	11.5343	8.118	7.6948	12.5011	8.6069	6.0524	7.9043	5.1179	10.1708	12.2686	11.9084	11.1366	11.6892	10.2587	417	0
TCGA.AC.A62Y	LumA	8.7521	12.2906	10.1666	10.7341	14.3219	11.6255	4.9768	8.6448	10.9766	0.4977	9.6782	9.6585	9.235	6.5161	9.6288	10.115	6.7838	7.2104	10.7061	9.7162	12.6265	10.4863	10.8272	10.8114	10.5312	530	0
TCGA.AC.A6IV	NA	7.5688	11.6304	11.0552	8.5749	14.4977	11.415	2.8239	8.8587	10.8421	1.2814	9.925	10.3496	11.443	6.6355	9.9889	10.4504	6.9083	7.6762	11.6733	9.3916	11.8101	11.61	9.5787	10.7022	10.6757	568	0
TCGA.AC.A6NO	NA	8.7093	11.9151	10.9671	5.7849	14.7727	11.0715	0.4807	6.6867	10.9967	0.4807	10.3403	10.513	9.7616	6.9359	8.4205	10.8243	7.5937	8.2055	8.1423	10.1384	11.6529	12.0638	10.3997	10.8324	9.784	51	0
TCGA.AC.A7VB	NA	8.3113	12.6109	8.453	4.6793	15.228	11.5568	7.3932	8.4372	12.3008	1.1181	11.274	10.7177	7.0544	9.1487	9.9222	10.9785	7.3704	7.861	6.0754	9.6574	12.5334	12.1208	10.4812	11.3562	11.0206	250	0
TCGA.AC.A8OQ	NA	4.8067	12.1633	11.9435	7.9915	15.9587	11.2091	2.0618	8.8112	10.8215	1.3716	11.2347	10.1883	10.5002	7.613	10.246	10.0206	6.5966	7.7144	12.3311	9.352	11.8444	11.1203	10.3057	11.3036	10.5007	34	0
TCGA.AN.A03X	NA	7.3375	11.6256	11.1143	6.19	14.7458	10.2082	9.5928	6.5269	10.7064	0	9.4461	9.4395	10.5193	4.1383	9.2725	10.6347	5.4922	7.1494	11.6041	9.4736	11.9418	11.3313	10.2972	11.4353	10.1058	NA	NA
TCGA.AN.A046	NA	9.2964	12.3814	10.7979	6.3431	15.0777	11.4576	4.84	7.7953	10.9459	0.8134	9.5448	10.2839	9.7497	6.5103	9.2586	10.6632	6.7212	7.3324	5.8902	10.0339	11.9638	11.2708	10.6034	11.202	9.9263	NA	NA
TCGA.AN.A049	NA	8.2646	12.3013	10.4949	6.5009	15.331	11.9253	1.6497	8.051	11.2101	0	11.1271	10.5836	10.2831	6.7528	11.4293	11.1884	6.5707	7.2872	11.7805	9.3854	12.4367	11.995	9.7616	11.966	11.8952	NA	NA
TCGA.AN.A04A	NA	7.5784	12.122	12.0347	6.3876	14.7367	10.5728	5.3912	7.331	11.1121	1.9264	10.5981	10.1325	11.557	6.0958	9.6708	10.9315	5.6034	8.688	11.5681	9.8407	13.5184	12.6909	10.5028	11.2867	10.4593	90	0
TCGA.AN.A0AK	LumB	3.2951	12.6411	8.9867	4.1885	15.6142	11.0645	0	7.4392	10.8993	0	11.2297	10.1899	8.0009	7.6449	8.4472	10.9577	6.2022	7.3931	7.3	10.4292	11.6026	12.5995	10.5054	11.914	11.1639	224	0
TCGA.AN.A0AL	Basal	7.0601	13.299	11.3967	5.8754	15.0648	12.0131	1.7721	7.7248	10.9726	0.4881	11.0976	9.328	11.1505	6.2054	10.868	9.2886	6.9423	7.4801	9.7778	9.8737	13.2503	11.9771	10.9972	10.7569	12.3798	227	0
TCGA.AN.A0AR	NA	4.5681	12.1836	11.8297	3.7824	15.3854	10.864	1.058	7.2074	11.0909	1.058	10.4101	11.4361	10.205	6.0949	9.6147	9.7741	7.5167	8.3691	1.4871	9.684	13.2416	11.4119	10.8429	10.4729	11.3671	NA	NA
TCGA.AN.A0AS	LumA	6.5448	12.5842	12.258	4.5213	14.7793	12.1343	1.8888	7.4616	10.702	0	9.1168	9.5547	10.6571	4.3506	9.7961	9.8681	6.9437	7.9615	10.927	9.9643	12.4249	10.6891	9.6115	11.1575	11.8526	NA	NA
TCGA.AN.A0FJ	Basal	4.3791	12.9881	12.9912	8.2339	15.267	11.2217	7.6843	6.2711	11.5318	1.1378	12.0416	10.4795	9.0102	8.4948	9.5359	9.9827	6.014	8.0241	8.1963	10.8754	11.9395	11.5773	10.3132	11.1601	11.7738	242	0
TCGA.AN.A0FL	Basal	4.6411	12.7268	11.7829	8.0996	15.332	10.7233	1.2521	7.6203	10.0123	0.5466	10.2464	10.2895	7.1839	5.3883	10.7055	8.4423	3.2857	7.8305	8.6909	10.166	13.5781	10.8047	10.8547	10.8406	10.1184	231	0
TCGA.AN.A0FN	LumA	7.9112	12.1092	11.6642	9.4996	14.1125	10.7085	1.8864	8.4867	10.3087	0.4192	8.9754	10.4318	11.7	6.0829	10.205	10.2588	6.3016	7.3109	9.3398	9.7174	11.7351	10.8983	10.24	10.8154	10.8157	218	0
TCGA.AN.A0FS	LumA	7.8624	11.8651	10.8664	7.9184	14.8805	12.1748	4.3927	6.271	10.2626	1.1803	10.0185	10.2552	10.9786	5.6	9.7613	10.3678	7.5322	7.6569	5.34	9.4615	11.9197	11.0792	10.0873	10.9398	9.9738	210	0
TCGA.AN.A0FV	Her2	6.3446	12.2727	12.4624	4.4453	15.0031	11.5277	0	6.7206	10.5246	7.1492	10.6033	9.7574	9.8672	5.9249	9.4393	10.6964	5.9997	7.5754	11.4514	9.4232	13.469	12.76	10.3092	11.7699	11.7208	NA	NA
TCGA.AN.A0FY	LumB	6.1705	11.9463	11.9424	5.0485	15.2388	11.4522	9.3523	6.1596	9.9639	0	11.4673	10.1121	10.1224	7.1635	9.5704	10.164	7.284	7.0522	9.4209	11.1261	12.1666	11.5522	9.7934	10.8038	10.7469	NA	NA
TCGA.AN.A0FZ	LumA	8.6869	12.4442	10.5028	5.3521	15.8047	13.272	0	6.8325	10.0793	0.3238	9.7955	10.2625	10.1577	7.4235	9.2613	11.0241	7.671	7.2571	12.6565	8.8278	12.438	12.5453	9.644	11.3695	10.4446	NA	NA
TCGA.AN.A0G0	Basal	5.6923	13.2632	13.9778	4.8631	15.1781	12.8698	0.6656	6.7547	10.8406	0.3708	10.513	10.09	10.4346	7.6272	9.268	10.1685	6.6193	7.1585	1.7419	10.4372	11.9878	12.044	10.4409	10.7774	12.1473	NA	NA
TCGA.AN.A0XL	NA	8.4945	12.3768	10.9533	9.1499	14.7766	11.1845	3.4732	6.4193	10.1308	1.3203	9.7131	10.3247	10.9572	6.8777	9.314	10.5999	7.2023	7.5784	8.9149	9.3492	11.5905	11.6423	9.9732	11.1385	10.6451	163	0
TCGA.AN.A0XP	NA	8.8277	12.0137	10.7476	8.1512	14.6227	10.997	1.193	7.1643	10.3782	0	9.1745	9.8719	8.8234	5.7461	11.6918	10.982	7.064	7.7165	11.9138	8.7317	11.7981	11.3986	10.3761	11.166	10.9327	NA	NA
TCGA.AN.A0XR	NA	8.8657	12.2644	8.9561	3.8362	14.9205	10.9629	0.4992	5.2712	10.7749	0	10.5238	10.0932	8.0443	6.2261	10.1615	10.5258	7.3853	7.424	8.1015	9.3725	11.7223	12.062	10.3387	10.5331	10.7688	NA	NA
TCGA.AN.A0XU	Basal	7.1769	12.5331	13.2744	10.2261	15.364	10.1607	1.4451	7.5448	10.2282	4.2152	11.5349	10.3988	11.2195	7.7985	10.6375	10.2545	7.2308	7.592	11.1153	10.214	12.9962	12.1783	10.5202	11.5601	12.209	NA	NA
TCGA.AN.A0XV	NA	8.5593	12.3709	11.1001	8.2353	14.5892	10.8451	1.0328	8.161	10.2319	0	9.4091	10.0142	10.4444	6.4509	9.5311	11.0703	6.9099	7.4367	9.3602	9.9911	12.2024	11.1827	10.2493	11.5664	10.7394	162	0
TCGA.AO.A03M	NA	7.5917	12.279	11.0523	6.9471	15.8294	11.8653	2.5388	7.7198	10.7004	0.6178	10.5121	10.247	10.4177	6.4359	9.9797	10.546	6.5424	7.1645	6.3898	9.163	12.6558	12.7144	10.7039	11.5305	11.6909	1866	0
TCGA.AO.A03N	NA	7.3196	11.8193	9.8764	4.791	15.145	10.42	0	5.6745	10.4915	0	9.3718	10.7954	8.9963	8.1993	8.5413	9.3783	6.494	8.2619	10.4068	9.6215	12.6971	11.1411	11.2322	11.3057	11.0011	2031	0
TCGA.AO.A03O	NA	5.8302	12.3122	10.6281	4.6897	16.3057	10.6939	5.9874	6.9095	10.5667	0	11.2003	10.6878	8.4816	7.3737	11.8637	10.8577	7.1458	7.679	3.2167	9.9016	13.2157	11.4452	9.9022	12.4158	11.2933	2483	1
TCGA.AO.A03R	NA	8.9842	12.1709	9.9285	7.5023	15.0395	10.9763	0.7379	7.8581	11.2376	0	10.7064	10.1319	9.3149	8.5485	9.584	9.6622	5.0753	7.5283	6.231	9.9951	12.6865	11.5935	10.7958	11.4831	9.9989	2091	0
TCGA.AO.A03U	NA	5.9044	12.9907	12.0778	9.3094	14.6464	10.9617	0	8.7555	10.688	0.6873	8.8558	10.1469	11.4967	5.153	11.2355	10.4192	6.8555	7.3108	2.2209	9.2134	12.0127	11.6364	9.725	10.7793	10.8093	1793	1
TCGA.AO.A03V	NA	8.7069	12.819	9.9485	6.6394	15.9895	11.1579	1.7454	7.0485	10.6634	0.4774	9.97	10.231	9.1744	5.1638	9.3565	11.0135	7.0356	7.1791	8.7015	10.9009	11.7123	10.6158	10.2796	11.3376	10.1768	1351	0
TCGA.AO.A0J2	NA	7.1239	12.9122	11.8531	3.0546	15.0005	11.2409	0	7.3116	10.3735	1.2778	10.7892	9.9683	8.9845	6.5742	10.4463	10.6403	6.3411	7.5886	11.1825	10.4798	15.0734	12.8281	11.616	12.283	10.3007	997	0
TCGA.AO.A0J5	NA	7.4726	12.1146	12.0536	6.7451	15.1938	11.3306	1.8168	7.632	10.4407	0.3565	10.0188	10.1273	11.1566	5.4626	8.706	10.6595	6.822	6.9712	9.5986	8.9723	11.8366	13.2606	9.7008	10.7008	10.0877	792	1
TCGA.AO.A0J6	NA	6.1014	11.9774	12.3538	9.5265	15.3096	11.7653	0	9.633	11.3923	0.8204	11.0179	10.2756	7.6821	7.0903	11.0384	10.3035	5.4891	7.0989	9.8067	10.1612	12.5101	11.6937	10.5517	11.3832	11.7011	1140	0
TCGA.AO.A0J7	NA	8.5947	12.2016	9.3768	4.2867	14.9982	10.7242	1.0525	7.2179	11.3299	0	11.6563	10.4141	8.3975	7.9457	8.4036	11.2697	6.3996	7.3119	10.0708	9.5922	13.2025	11.6772	9.6767	11.8096	10.7409	618	0
TCGA.AO.A0JB	NA	7.2559	13.2581	10.4044	8.0725	14.567	11.0102	1.2437	7.2299	12.6039	1.2437	8.9348	9.9313	10.4844	7.4406	8.9627	9.0322	7.048	8.0795	8.094	10.4275	11.3337	12.6247	11.4469	10.99	9.7064	1542	0
TCGA.AO.A0JD	NA	8.3869	12.3184	9.6777	6.583	15.3651	10.5752	6.6213	6.6486	11.2466	0.8094	10.8438	10.0248	8.3071	6.1956	9.6168	11.2533	6.9011	7.3733	7.7285	10.4954	13.8318	12.69	10.3841	11.9974	11.3947	2190	0
TCGA.AO.A0JI	NA	7.7903	11.0277	9.3434	6.6315	14.8756	11.4601	0	8.7981	10.4799	0.8134	10.1809	10.1485	8.6851	6.5094	9.414	11.5826	7.3343	7.8881	4.173	9.9341	12.1338	10.9157	10.0318	11.8963	10.0956	1528	0
TCGA.AO.A0JJ	NA	8.4405	12.1686	11.0135	8.4501	13.8626	10.769	1.2871	8.2421	10.5766	1.0568	10.4197	9.5424	11.3064	6.6479	9.8756	10.5453	6.6649	7.2672	11.6918	9.6427	12.18	11.3774	10.0102	11.1797	10.3045	1887	0
TCGA.AO.A0JL	NA	6.8185	12.5053	10.3525	8.3099	14.1152	11.3356	0	7.5551	11.7568	0	9.2567	11.0551	8.7735	6.7601	8.8226	8.926	8.1623	7.9576	4.7701	11.2771	11.814	10.989	11.058	11.0741	10.2352	1683	0
TCGA.AO.A124	NA	6.5421	11.738	13.687	7.6528	16.1998	10.3982	3.2177	6.291	10.5253	0.6532	11.4882	11.8478	8.0089	7.3077	10.5659	10.1106	7.1715	7.1886	10.3875	11.2527	13.7881	12.0766	10.4973	11.4544	10.6477	3506	0
TCGA.AO.A128	Basal	7.6549	13.1285	12.8023	8.7525	15.0192	10.9755	1.5359	9.0723	11.4691	3.4998	11.4018	10.4129	9.1392	6.2074	11.3585	10.0319	6.3552	6.8246	8.5306	9.6961	12.6972	11.412	10.3847	11.724	11.1034	3248	0
TCGA.AO.A12C	NA	7.949	11.7392	12.1324	6.5193	15.9937	11.4276	3.9002	7.233	10.7563	0	8.8411	10.3329	11.864	4.3023	8.9766	11.1323	6.7466	7.115	4.4937	8.8635	11.983	11.0603	10.151	11.5116	10.2031	2372	0
TCGA.AO.A12E	NA	9.1123	12.011	11.3958	8.7586	14.8913	10.5263	2.8096	8.6237	10.6922	0.6289	10.4353	10.3822	10.5328	7.3091	10.4715	11.4719	7.1384	7.2384	11.244	9.319	11.8577	11.454	10.394	11.3666	11.3433	2142	0
TCGA.AO.A12G	NA	7.1396	12.723	11.0573	6.965	15.2768	11.0772	5.8125	7.1231	10.7591	0	9.7384	10.0647	10.2967	6.4425	8.866	10.1821	6.6696	7.4774	5.6611	9.9764	12.8985	11.3178	10.5143	11.3482	11.0203	1639	0
TCGA.AO.A1KP	LumB	7.821	10.7764	9.0585	5.188	15.2417	10.8276	3.315	8.287	9.5035	0.4132	9.8709	10.572	8.0183	7.1324	9.3732	11.0465	8.4504	7.5873	5.9774	10.295	11.7075	10.8002	10.4684	11.7331	9.6254	2953	0
TCGA.AO.A1KS	LumB	7.2037	11.6932	11.4556	7.558	14.8889	11.6486	5.3337	7.0752	9.329	1.4074	9.0275	10.3886	10.0313	5.3628	9.763	11.5491	7.2915	6.1578	2.3121	11.2541	12.8343	11.7333	9.7821	12.2522	10.8968	350	0
TCGA.AO.A1KT	LumB	8.2596	11.7212	10.7696	5.9506	16.3081	10.3683	0.9275	9.1368	9.6393	0.6792	10.9558	10.1286	9.8886	7.8076	9.3841	10.3676	6.9608	7.5753	11.7104	10.4697	12.4745	11.679	10.4605	11.2391	11.5709	541	0
TCGA.AQ.A04H	LumB	7.7731	11.7058	10.707	5.0465	14.5122	11.7386	0.3717	7.901	10.6858	0.3717	10.8131	10.3594	8.3819	6.9197	8.3961	11.3182	7.1171	6.9522	7.4363	9.1381	12.3725	12.15	9.7337	11.4831	11.2366	754	0
TCGA.AR.A0TP	Basal	4.9733	12.9886	13.9079	9.0287	15.2017	11.2286	0.4458	8.0136	11.0201	2.2081	12.0774	10.8383	9.911	6.9155	8.6241	9.7307	6.9299	7.0725	5.7988	10.3564	12.53	11.5341	10.7406	10.16	12.1726	4275	0
TCGA.AR.A0TQ	LumB	8.7804	12.3169	11.8803	6.6518	15.2951	11.6493	3.1597	7.4449	10.1251	0.349	11.0095	9.9716	10.1772	6.9191	10.9962	10.5334	6.755	7.2845	12.2756	9.4818	12.1037	14.1192	9.767	11.0821	11.0031	2991	0
TCGA.AR.A0TW	LumA	8.6605	12.4583	9.9178	5.3271	15.561	11.6031	2.3049	8.1028	10.769	0.4097	9.9931	9.2099	9.1479	5.1676	8.6791	11.4396	6.6653	7.8388	3.8214	9.7999	12.6786	13.2114	9.8475	11.5445	12.2418	3009	0
TCGA.AR.A0TZ	LumA	7.9746	11.1681	12.206	5.1121	15.3652	11.1041	4.3493	7.7904	10.5176	0.3095	10.8528	10.6299	8.9326	8.0693	8.5772	11.1601	5.8145	7.2479	7.1147	10.2019	11.9071	10.8074	9.8298	10.7051	11.0438	3262	1
TCGA.AR.A1AI	Basal	5.5943	13.5585	13.318	8.8224	15.751	9.6811	1.4339	7.9706	10.5092	0	11.5201	10.2191	8.4407	6.39	10.4188	10.5069	6.9247	7.2936	7.9764	10.014	13.2991	11.7839	10.9682	11.9517	10.8385	3296	0
TCGA.AR.A1AK	NA	8.3851	11.9388	10.7132	8.4154	14.4688	10.582	3.4958	9.1245	9.9103	1.3683	9.9466	10.1384	11.181	7.4344	11.0213	11.0539	7.6713	7.3322	12.1584	9.1747	11.7276	11.8699	9.6758	10.955	10.9903	3159	0
TCGA.AR.A1AN	LumA	8.4442	12.7899	10.8515	7.0174	14.8403	11.4192	0.429	7.211	11.0539	0	9.9949	10.0095	11.8682	5.7429	8.9282	10.1773	6.1274	7.7528	8.7413	10.194	12.2582	11.4143	10.4084	11.1811	10.2521	2920	0
TCGA.AR.A1AQ	Basal	6.3773	13.2371	11.5332	5.5253	16.5139	11.0988	5.6753	8.5124	10.5976	2.0353	10.8076	10.3013	9.8759	6.9664	11.2008	10.0713	6.808	7.5545	7.8116	11.1858	13.285	11.5921	10.8458	11.4493	11.113	3021	0
TCGA.AR.A1AR	Basal	4.4272	12.5198	12.313	6.934	15.0825	10.5039	1.7956	8.6674	9.9683	1.1608	10.7334	10.155	12.0158	5.9036	11.4967	10.9091	6.6737	6.7974	3.2706	11.1205	13.0599	10.4163	11.0337	11.8785	11.2198	524	1
TCGA.AR.A1AS	LumA	9.0875	12.3964	9.2909	2.6501	15.0378	10.798	2.6787	7.2591	10.5301	0.5363	11.1893	10.0344	9.2311	6.4562	8.0877	11.12	7.069	7.6407	11.8306	9.8068	12.668	11.9668	10.2918	11.6745	9.1298	1150	0
TCGA.AR.A1AT	NA	8.0435	12.2856	13.6073	5.2842	14.8311	11.0518	6.4609	8.2516	10.8281	0	10.6783	10.3525	9.6612	6.1615	10.4668	10.7386	5.9339	7.7454	7.0741	9.5599	12.7147	12.6232	10.0472	11.2453	10.8465	1272	1
TCGA.AR.A1AW	LumB	5.7026	12.0407	10.2252	6.9565	14.775	10.5347	2.8938	9.0047	11.0525	2.0097	10.1589	10.8023	11.2831	6.8939	10.4006	10.9836	7.2866	7.2512	2.7389	9.2646	11.8908	10.8706	9.7675	11.182	10.8808	2632	0
TCGA.AR.A1AY	Basal	5.9625	12.3553	12.7903	7.6956	15.3992	11.2161	5.7622	6.4727	10.7764	2.7029	11.5373	10.3318	9.9554	6.4248	8.8771	9.9863	7.0044	7.3326	5.5747	10.9627	12.3494	11.6175	10.533	11.6921	11.9179	1026	0
TCGA.AR.A24L	LumA	7.3733	11.398	12.5811	8.1339	15.4294	11.4651	7.8126	7.6288	10.0088	2.0475	9.9811	9.4845	11.1784	7.2136	9.6666	10.8554	6.8795	7.1287	7.9285	10.0846	11.6656	11.6709	9.7703	11.8459	10.7736	2866	1
TCGA.AR.A24M	LumA	8.7473	12.0958	11.8506	7.3667	14.5878	10.2755	0.3262	7.3917	9.8619	0	10.492	9.7967	11.6667	6.0042	9.7276	11.0732	6.8727	7.1579	11.0488	9.6445	11.6662	11.1863	9.937	11.7272	11.8634	3660	0
TCGA.AR.A24O	LumA	8.2339	12.2937	11.7904	9.2671	14.6834	10.7996	4.744	7.4495	10.1645	0.7475	9.6549	10.081	11.7707	5.9721	10.5383	10.8735	7.0885	6.8462	9.4419	9.8075	12.0671	10.9609	9.9063	11.1466	10.4757	3607	0
TCGA.AR.A24T	NA	8.3213	11.8548	11.4619	7.4686	14.5261	10.9115	4.937	8.0041	10.1801	1.1943	9.6452	10.3285	11.4345	5.5348	10.2259	11.1062	7.0594	7.3517	5.882	9.767	12.2072	10.6028	9.9936	11.5097	10.2773	3202	0
TCGA.AR.A24W	NA	8.2617	12.1068	12.6162	10.1962	14.9136	10.8427	1.6796	6.9715	10.1606	0.4512	9.0333	10.0909	11.3663	5.4593	9.6586	11.2795	6.8062	6.9243	7.0773	9.9571	11.6865	10.8525	9.671	11.3878	11.5621	1550	0
TCGA.AR.A24X	NA	7.8601	11.8986	12.3464	6.8266	14.8487	10.4084	1.7891	6.9689	10.0146	0.5765	9.6209	10.3521	10.3403	5.933	8.9169	11.4947	6.769	7.4783	8.9645	10.3666	11.8842	11.7639	10.1995	11.345	10.1905	3004	0
TCGA.AR.A251	NA	7.2252	12.5479	13.5604	9.5083	15.671	10.854	2.2403	7.3039	10.4077	0.4568	11.1653	9.6823	10.4865	7.9464	10.3386	9.8521	6.983	6.2736	10.2111	10.8511	11.4034	10.4349	10.2617	12.3741	11.4906	3030	0
TCGA.AR.A252	NA	8.6184	12.31	11.2826	8.8979	14.6914	10.998	1.9866	8.3317	9.5913	1.9866	9.6965	9.9008	11.3119	4.8627	10.3677	11.3895	6.4018	7.0472	1.4739	9.6945	12.1454	12.8831	10.1313	11.5429	11.1698	2838	0
TCGA.AR.A255	NA	8.0773	12.0457	11.7441	7.938	15.3932	10.433	7.5073	8.0369	10.4092	0.9494	10.6531	10.084	10.6543	6.7119	11.6785	11.7069	7.6493	7.0543	9.5702	9.6177	11.624	11.4383	9.6442	12.2438	11.2504	2161	0
TCGA.AR.A256	NA	4.5355	12.3975	12.911	8.935	15.3289	10.0441	1.873	8.625	10.4953	0.6707	11.5108	9.6458	8.9432	6.7434	10.1788	10.6158	6.4785	7.1146	10.4905	11.2925	12.5435	11.2945	11.3384	12.2685	9.8183	2854	1
TCGA.AR.A2LH	NA	7.6905	12.6017	12.0288	8.1493	14.7999	10.8599	1.6337	8.289	10.9324	1.8595	10.2776	10.4106	11.0249	6.3074	10.7127	10.4599	6.5636	7.9821	10.3398	10.0948	12.9388	11.1865	10.2837	10.3822	10.6853	616	1
TCGA.AR.A2LK	NA	8.6104	11.8081	10.673	5.358	15.8931	10.7135	4.9848	7.7688	10.0391	1.147	11.203	10.0651	9.9414	7.6568	8.7664	11.8474	7.5501	7.3364	7.7197	10.1554	12.7728	11.3668	9.4753	11.5253	11.1276	1649	1
TCGA.AR.A2LN	NA	7.5192	11.9362	11.6702	9.1432	14.1827	10.9874	0.6381	7.4008	10.4449	0.6381	8.4131	10.2713	11.3104	4.435	9.9069	10.6008	7.898	7.101	10.2385	8.9816	11.519	10.8213	9.4459	10.6258	10.1445	1161	0
TCGA.AR.A2LO	NA	7.9089	11.6136	11.7519	8.1702	14.7428	11.3414	1.8352	8.4245	10.7772	0.598	10.552	10.5856	11.2425	6.6366	9.5837	10.8983	7.8903	7.8966	9.1795	9.9328	11.6792	11.2494	10.2155	11.0145	9.7759	1198	0
TCGA.AR.A2LR	NA	5.7397	11.9998	12.4684	10.1401	14.8799	12.6468	3.768	7.8973	11.0629	3.9603	11.3849	10.4399	11.8932	7.717	9.7714	10.5599	7.5465	6.6722	9.0844	10.164	12.5685	11.2764	10.367	10.6195	11.4482	1742	0
TCGA.AR.A5QM	NA	8.7246	12.1705	10.2817	7.3566	14.2439	11.6308	3.3714	8.5089	11.3912	0	9.3641	10.3244	10.0426	5.318	9.3902	10.8622	7.4844	7.5848	7.685	8.5961	12.8107	11.0205	10.1852	10.6277	10.7029	2231	0
TCGA.B6.A0I1	NA	8.0871	12.8871	10.2828	8.6687	14.9342	10.4277	0	8.0168	10.2165	0.4041	10.6034	9.5366	6.1632	7.3414	10.0553	9.672	6.5662	8.0888	10.058	11.0124	12.9035	11.2618	11.469	11.3692	10.401	2361	1
TCGA.B6.A0I5	LumA	9.734	12.6183	10.8771	5.839	14.8965	10.256	2.7223	8.8014	10.7894	0.6415	8.9943	10.3456	9.967	5.8635	8.7366	9.7733	6.3901	8.946	11.1643	10.463	11.3679	12.0458	11.7272	10.6789	10.0443	8556	0
TCGA.B6.A0IA	LumA	10.1344	12.4095	7.2366	4.152	14.5851	10.1339	8.5026	7.5835	11.0191	0	9.7762	9.7275	6.3855	7.1051	8.5623	9.8901	5.4168	7.9415	11.6384	10.2277	12.3012	11.4494	11.1266	11.7518	9.1034	8391	0
TCGA.B6.A0IE	LumA	7.9123	13.2893	10.8006	6.0423	15.4953	10.7154	1.2301	6.0208	10.9415	1.0068	10.4261	9.6983	10.046	7.863	8.5821	9.006	6.3709	8.6159	8.5226	10.0992	11.7105	12.4025	10.8459	11.1607	10.5472	1993	1
TCGA.B6.A0IH	LumA	6.3485	12.1211	12.4422	8.7583	14.1352	11.0087	4.5458	7.267	10.7403	2.3146	9.1794	10.6926	10.5643	5.1038	9.44	10.6446	7.3746	7.1558	3.1618	9.68	11.5711	10.6234	9.9171	10.8589	9.8465	3418	1
TCGA.B6.A0IO	LumA	8.5356	12.9606	11.9572	5.055	14.9402	10.8105	0.7294	7.7203	10.3492	2.7911	9.9607	10.2637	7.8929	7.1115	8.7711	10.378	7.892	6.9158	10.7072	9.9815	12.073	11.8708	10.0799	11.5321	10.6701	5042	0
TCGA.B6.A0IP	LumA	8.5581	12.1853	9.8495	7.1099	14.2638	10.7343	1.2633	7.2767	10.777	0	10.2263	10.3939	9.6762	6.4636	8.9434	10.5457	7.1372	7.9199	2.595	10.0315	11.5731	11.6033	10.1959	10.7566	10.1134	3926	1
TCGA.B6.A0IQ	Basal	4.517	12.8992	11.4081	3.5992	15.1073	10.7089	2.9816	6.1955	10.8709	1.6321	12.2169	11.2744	9.7767	8.0337	8.8186	9.2763	7.4755	7.2833	1.7654	10.9284	13.3593	11.5831	12.0713	11.9721	11.5513	4285	0
TCGA.B6.A0RG	LumA	10.779	12.171	9.8338	5.3486	16.223	10.9984	1.824	7.7947	11.2364	3.829	9.8719	10.4124	9.3607	7.258	9.1461	10.3603	6.4324	7.6081	8.1239	9.498	13.3083	11.7669	10.3418	11.5373	10.496	2082	0
TCGA.B6.A0RI	LumA	9.0669	12.3793	12.2705	4.5488	14.8255	10.7883	2.185	7.5598	10.7977	1.5533	9.948	10.5088	10.4647	6.9381	9.2515	10.9871	6.4446	6.9451	6.7427	9.7456	12.0798	11.5009	10.1163	11.2815	9.7993	7126	0
TCGA.B6.A0RL	NA	7.5739	11.8086	11.073	2.9905	15.6388	10.8678	1.509	9.0696	10.9817	0	11.449	10.8168	3.3626	8.408	9.6329	10.9742	7.7116	8.3767	3.2653	9.177	11.6655	11.6876	10.6311	11.2181	11.4236	2469	1
TCGA.B6.A0RN	LumA	8.5751	12.0994	11.992	5.7562	14.5599	10.5978	2.9222	6.2053	10.6717	0.4969	9.4489	9.9763	9.8528	5.9902	9.0005	10.2994	6.875	8.1494	6.8131	10.194	11.3967	11.1819	10.2364	11.1289	9.6704	8008	0
TCGA.B6.A0RP	LumA	8.4631	11.8312	10.3839	6.4639	14.5122	10.5549	3.4339	7.5889	10.561	1.1068	9.7099	10.0425	9.9536	6.0893	9.6813	10.7063	7.3213	7.7406	11.158	9.1322	11.4349	11.0929	9.8585	11.4454	9.971	3126	1
TCGA.B6.A0RQ	NA	7.571	12.1808	11.9651	10.6669	14.9187	10.8053	0	7.0872	10.7842	0	8.7276	10.3367	11.9771	5.1701	9.5113	10.5124	6.8942	7.9235	2.4153	9.8004	11.9132	12.0132	9.8789	11.0076	10.3412	4267	1
TCGA.B6.A0RT	Basal	6.4664	12.0113	11.6178	7.4276	15.0301	10.7372	3.0552	9.5768	10.5962	3.5225	10.5101	10.4857	11.0984	6.1166	10.4728	10.2336	6.8551	7.7982	8.8694	10.2705	13.4718	11.4805	10.0455	10.8473	10.4997	2721	0
TCGA.B6.A0RU	Basal	6.8575	12.3643	14.5772	10.0167	15.2244	9.9984	0.4381	5.9713	10.2704	0.7737	11.9556	9.7876	10.7686	6.6642	9.5597	10.2729	5.175	7.9886	3.5416	10.5278	13.4515	11.2838	10.652	11.5851	10.8214	8605	0
TCGA.B6.A0RV	LumA	8.7962	12.3021	11.6388	7.0947	14.7914	11.8601	3.8386	7.2345	11.0893	0.4887	10.4364	10.504	10.1561	5.6618	10.2583	10.3894	6.2931	7.5209	10.0292	9.7296	12.3738	11.5013	10.3188	10.8251	11.0052	5156	0
TCGA.B6.A0WX	Basal	6.4444	12.4746	11.9487	7.2825	14.9156	10.2654	2.0121	8.8827	11.1349	0.4638	10.6403	10.4011	10.8339	7.3386	8.7274	10.013	6.8473	7.6636	5.8739	10.3242	11.7554	11.4268	10.719	11.2162	9.9618	639	1
TCGA.B6.A0X4	LumA	8.6291	12.3686	10.6844	7.7032	15.4621	10.8878	13.321	7.7181	10.793	1.9824	8.7684	9.9833	6.4693	5.6171	7.8158	11.2081	7.4029	7.3878	6.729	10.4273	11.6866	11.5269	10.173	11.5611	10.7727	860	1
TCGA.B6.A0X7	LumA	7.8688	12.2116	11.4605	7.3192	14.4122	10.5165	1.2468	6.7517	10.8578	1.7668	9.3362	10.6107	10.3646	5.2454	9.6718	10.5246	7.6397	7.8453	3.812	9.5229	11.8446	10.9766	10.0809	11.0196	9.9296	1781	1
TCGA.B6.A1KF	Basal	5.3991	13.1157	11.6248	6.1855	16.6281	10.1164	2.9316	7.1935	9.5216	0	11.0509	10.3923	10.1741	6.3991	8.8256	10.1978	6.1567	7.7453	4.5971	10.609	13.2012	11.3418	10.5473	12.1701	11.6918	3088	0
TCGA.B6.A1KI	LumA	8.3965	12.3361	11.0242	8.7581	14.6888	10.9648	0	6.7523	10.5708	0.3712	8.5769	10.1377	9.3043	5.7909	8.7403	11.0377	6.9773	7.5197	10.0614	8.9846	12.3351	11.0778	10.5688	10.8417	10.968	2236	0
TCGA.B6.A401	NA	8.8523	12.3751	10.9376	6.2555	14.1424	11.7167	7.067	9.0626	11.7613	0.7521	9.8856	10.1205	9.6119	7.2566	9.1547	10.0851	7.2369	7.972	11.9317	9.4341	12.3072	11.6975	10.5715	10.7845	9.4852	2596	0
TCGA.B6.A408	NA	8.6843	11.9821	9.9987	6.5982	14.5504	11.8163	6.3518	8.545	11.1578	1.6344	10.1582	10.4387	8.2564	7.3675	11.1287	10.6897	7.4965	8.1554	7.5515	9.4799	11.9097	11.0872	9.8695	10.6309	10.8166	2072	0
TCGA.BH.A0AU	LumB	8.2829	12.3976	11.1306	6.7708	14.9673	11.2953	0.5373	8.8954	10.0296	0.5373	10.4792	9.6096	10.5496	6.5641	9.7881	10.7023	6.7722	7.033	5.315	9.5561	12.0214	12.0794	9.7102	11.8063	10.9363	1914	0
TCGA.BH.A0AV	Basal	5.8849	12.153	13.824	7.5298	15.4086	10.404	4.4913	7.2836	10.2867	2.746	12.161	10.7633	12.2158	6.0732	10.6327	9.9658	6.835	7.3082	10.9648	9.5665	12.3436	11.7082	9.7515	11.1319	11.2898	1820	0
TCGA.BH.A0AZ	LumA	7.9017	12.6129	12.4723	7.4252	15.0452	11.0343	4.8476	7.7717	10.7985	0.9696	9.1036	9.8205	12.2467	5.8233	9.5274	10.6559	5.9619	7.6428	10.0953	9.5478	11.9722	11.641	9.4215	11.0905	10.439	1919	0
TCGA.BH.A0B3	Basal	7.3488	12.6578	12.6559	6.8437	15.409	10.6345	5.4594	8.3864	10.9151	0.4687	10.8849	10.2274	10.4891	7.2163	11.6671	10.0548	5.2129	7.359	8.0897	10.108	12.8144	11.8713	10.4058	10.6864	11.3569	1203	0
TCGA.BH.A0B5	LumA	7.7311	11.8135	10.9979	6.7406	14.1668	11.2837	6.7379	7.7357	10.6212	0.7373	10.8579	10.2751	10.5646	6.7072	9.8662	11.1281	7.6472	7.0453	5.6734	9.5134	12.4203	11.1201	9.9488	10.9629	10.349	2136	0
TCGA.BH.A0BC	LumA	8.2965	12.5343	10.696	7.2243	14.6414	11.5206	2.99	8.2756	11.1227	0.3806	11.1676	9.9122	9.9162	5.6657	10.3202	10.0878	5.5484	7.6971	3.9814	10.0741	12.6617	11.8036	10.4027	10.8303	10.5418	974	0
TCGA.BH.A0BD	LumB	8.074	12.5294	12.4292	7.8667	15.1696	9.9247	5.0176	8.4278	10.4018	4.6364	11.0761	10.1786	10.8141	6.8153	10.2651	10.8614	6.5676	7.4961	6.5324	9.3547	12.3052	11.2423	10.1477	11.2274	10.7136	554	0
TCGA.BH.A0BF	LumB	7.2517	12.1822	12.6819	6.6782	14.8603	10.839	7.8897	8.5977	10.5208	1.3454	9.8703	10.5592	11.551	5.6215	11.1375	10.2996	7.2185	7.2407	8.0324	9.7017	12.0639	12.2962	9.7916	11.2285	10.6817	1324	1
TCGA.BH.A0BJ	LumA	8.5033	12.3084	11.2993	8.7502	14.3738	11.313	0	7.9899	11.0144	0.4421	9.4855	9.6053	10.9573	6.0985	9.0693	11.179	6.4442	7.7	1.4819	9.9177	12.7604	11.215	10.4256	10.6855	9.9505	660	0
TCGA.BH.A0BL	Basal	6.2144	12.1554	13.142	7.792	15.0924	10.4719	2.8236	8.9404	10.1416	1.4976	11.1504	10.167	11.7028	6.8427	10.5841	10.4909	7.4551	7.6	7.888	10.3161	12.3968	11.1726	10.6346	11.2696	10.518	2278	0
TCGA.BH.A0BM	LumA	9.0367	12.1523	11.1378	8.6774	14.6615	10.2655	2.0651	6.8773	10.723	1.8269	7.9587	10.1384	10.3834	6.1801	8.9869	10.1228	6.9445	7.9807	12.7538	9.6283	12.0085	11.3952	10.5886	11.1247	9.7698	1876	0
TCGA.BH.A0BQ	LumA	8.5117	12.5818	12.3501	7.0713	14.7011	10.5225	0.5526	7.622	11.2588	0.9511	9.5217	10.5032	11.6662	5.2444	9.8104	10.813	6.6361	7.7495	6.1015	9.5739	12.1812	11.7953	10.194	10.9492	9.8014	2255	0
TCGA.BH.A0BS	LumA	9.4987	12.782	10.1683	6.391	14.6753	9.9036	1.7074	7.4443	10.1031	0	9.1015	9.5307	7.8468	5.4862	8.4956	11.1497	6.3504	7.0347	1.9683	9.881	12.2169	11.6534	10.317	11.1365	10.0535	2612	0
TCGA.BH.A0BV	LumA	8.6593	12.1236	10.5343	5.4578	15.4394	10.9403	5.6472	8.5048	10.7496	0	10.251	10.2142	10.3	6.7451	10.0421	10.7646	7.1066	7.4873	11.9496	9.6101	12.7328	11.4677	10.0395	11.2399	10.1821	1519	0
TCGA.BH.A0C1	LumA	7.1206	11.8965	11.0437	6.8539	15.1355	11.018	5.0292	6.5081	10.6755	0.9922	9.9468	10.9146	10.1847	5.5197	8.9012	10.9846	7.6592	6.6522	8.737	10.3695	13.1477	10.755	10.1063	11.4016	10.0224	1411	1
TCGA.BH.A0DE	LumA	6.6031	11.5429	11.2721	8.8042	14.5224	10.47	2.1995	8.5648	10.4929	1.3768	9.2198	9.7538	10.2025	6.6402	10.106	10.4321	6.8218	7.6908	7.6796	9.8796	11.5168	11.832	9.9442	11.2415	10.8271	2372	0
TCGA.BH.A0DG	LumA	7.075	11.8223	12.7461	6.6101	14.7439	11.6451	1.1704	8.2224	10.6921	1.8079	9.9716	10.0616	11.5537	4.5767	10.0372	10.4214	6.3988	7.2746	12.0356	8.9921	12.247	12.5174	9.8891	10.6243	11.0207	2041	0
TCGA.BH.A0DI	LumA	6.8624	12.7285	12.515	8.1061	14.7043	11.1213	6.4953	7.9776	10.9342	1.1667	9.565	10.2892	11.44	6.5804	9.1837	10.7674	6.5475	7.3325	5.3808	9.1556	12.201	11.352	9.7873	10.8938	10.6752	912	0
TCGA.BH.A0DL	Basal	5.9719	12.801	12.7858	4.9978	14.2917	10.5386	2.5708	10.3748	10.081	0.946	11.2377	9.9206	9.9675	7.5771	12.1974	10.7228	7.5052	8.0315	11.6608	9.5254	13.7197	11.7539	10.1391	11.1209	10.21	2381	0
TCGA.BH.A0DP	LumA	8.0454	11.9369	11.4733	8.1587	14.2791	10.8003	5.4966	7.6022	10.9229	0.5146	9.5229	9.6384	10.8173	5.8131	9.4461	11.0432	6.984	7.3715	7.279	9.9297	12.4235	11.007	10.4857	11.2185	10.2095	476	0
TCGA.BH.A0DQ	LumA	9.1294	12.1683	11.0257	7.6917	15.7268	10.6239	4.6503	7.6761	10.7141	0.4944	10.0147	10.5975	11.1561	7.3508	9.8152	10.3244	6.0259	7.8394	6.7283	9.8139	12.303	11.123	9.9754	10.9599	10.5185	98	0
TCGA.BH.A0DT	LumA	8.222	12.0769	12.3368	7.5872	14.5618	10.5238	1.3493	7.4103	10.4131	0	9.1416	10.5317	10.8296	5.4282	9.3931	10.8943	7.1443	7.4713	6.3957	10.2503	11.7785	11.4899	10.1595	10.8816	9.7625	2403	0
TCGA.BH.A0DX	LumA	8.4653	12.6014	10.7919	6.9726	14.5289	11.2124	3.1997	8.0246	10.8495	0.8026	9.9667	9.8476	10.3829	5.3724	8.6769	10.4123	7.1427	6.6438	9.6154	10.7659	12.6348	11.6901	9.4837	10.9923	10.6824	2156	0
TCGA.BH.A0DZ	LumA	7.34	12.4152	11.6599	5.4755	15.039	10.5112	0	7.1291	10.7386	0	10.4124	9.3854	10.6431	5.1597	9.7287	9.638	5.5473	7.645	12.4425	9.7473	12.7515	12.7392	10.2976	10.9762	11.0134	495	0
TCGA.BH.A0E6	Basal	6.6176	12.9871	11.0541	5.7793	15.2528	10.1879	3.1609	9.1845	11.0842	1.5206	10.0954	11.0582	9.2626	7.5082	9.7644	9.1374	6.0019	8.4988	9.6457	10.3988	13.224	12.4499	12.1781	10.3039	9.9612	293	0
TCGA.BH.A0E7	LumA	9.1048	12.1625	10.3354	4.8078	14.9914	10.6339	4.8098	7.3099	9.9579	0.6558	9.3116	10.1304	8.1848	5.5548	8.7929	11.1135	6.797	7.3099	3.6449	9.5765	11.6688	11.2246	9.6293	11.1133	10.6417	1363	0
TCGA.BH.A0EB	LumA	8.6202	12.6619	10.816	7.8989	14.6679	10.7612	0.7299	8.41	9.9795	0.4107	9.5	10.2318	10.4724	6.1679	10.1	10.9385	6.4032	7.7462	8.6909	10.0308	12.3399	11.5124	9.9615	11.0285	11.4023	745	0
TCGA.BH.A0GZ	LumA	9.2988	11.7781	10.3642	6.0939	15.0309	10.3731	0	8.3336	11.1223	0	10.2347	10.0377	9.5641	7.5813	8.8947	10.3891	6.9405	8.2474	7.9615	10.0862	12.5087	11.0569	11.138	11.2424	10.4238	328	0
TCGA.BH.A0H6	LumA	10.2788	11.9749	11.8695	6.1347	14.7617	10.5974	0	7.8462	10.4251	0.8568	9.5762	10.0671	9.7484	6.4928	9.1246	10.6405	6.6015	7.9958	6.1112	9.7059	11.6071	11.0768	10.0818	11.0762	10.1457	747	0
TCGA.BH.A0H7	LumA	8.6147	12.5129	11.4546	5.991	15.5444	11.1056	1.4014	7.7704	10.4463	0	10.6493	9.8178	10.1503	6.657	9.3246	10.3786	6.33	7.6026	8.6832	10.0531	12.5085	11.4837	9.9063	11.5047	11.8203	702	0
TCGA.BH.A0H9	LumA	8.0934	11.969	9.9093	8.0341	15.5883	11.4524	0	6.9651	10.9261	1.1196	10.1875	9.785	9.5021	6.4782	8.6132	10.9059	6.4496	7.2545	12.0209	9.8934	12.5608	11.6535	10.4679	11.4952	10.4603	1247	0
TCGA.BH.A0HB	LumA	9.3902	12.5997	9.7148	6.2055	15.4109	10.9813	2.6463	7.791	11.3906	0	11.3084	9.5293	9.1027	5.7253	9.7376	10.2567	5.6095	8.3831	8.4238	9.8139	13.4448	11.0335	10.886	11.4179	11.3605	806	0
TCGA.BH.A0HF	LumA	8.9867	12.47	11.1252	6.9655	14.8501	10.5561	0.5334	7.7226	10.5306	0.9218	9.9738	9.7485	10.3458	5.4435	9.4272	10.1958	5.6876	7.5882	9.6354	9.8372	14.1929	11.4945	10.4219	10.813	12.1539	727	0
TCGA.BH.A0HI	LumA	9.1205	12.6305	10.3571	8.6031	14.6761	10.9524	1.7914	7.1921	10.7957	0.7683	9.1803	10.0167	9.5201	5.4412	8.9688	10.6153	5.8659	7.5766	8.134	9.4935	11.9892	11.3809	10.2983	10.926	10.4755	620	0
TCGA.BH.A0HK	LumA	7.7894	12.1608	10.5451	8.4124	14.8224	10.1735	0	7.2599	11.0659	1.3677	9.2466	10.2739	10.594	4.8668	9.5522	10.8081	5.6131	6.8562	11.553	10.3775	13.3685	11.5418	10.2473	11.433	11.4769	178	0
TCGA.BH.A0HL	LumA	4.7451	12.034	9.6069	3.6244	14.9067	13.3455	8.6717	8.1639	10.6505	0	9.9917	10.0161	6.4775	7.8279	7.4248	9.389	6.9055	7.2221	3.8288	9.6327	10.9893	10.7032	9.3948	10.4328	11.0408	72	0
TCGA.BH.A0HP	LumA	7.8824	12.1691	11.0802	8.1817	14.9877	10.2506	1.1937	7.5297	10.9646	0	9.446	10.3986	10.9484	4.6013	9.1998	10.7289	7.1097	7.2505	6.4258	9.7808	12.863	10.6974	10.0895	11.2402	10.2612	414	0
TCGA.BH.A0HQ	LumA	8.7106	12.0887	11.6582	7.0194	15.1754	10.653	0.536	6.8375	10.8627	0.536	9.4616	10.3927	10.8134	5.7629	8.4972	10.8214	6.7914	7.7995	8.1946	9.4708	11.8217	11.2592	10.1033	10.9148	9.9956	1121	0
TCGA.BH.A0HW	LumB	7.6167	11.6646	9.2975	4.5817	15.2834	11.3827	4.5396	7.3252	10.1351	1.3125	9.0551	10.2401	4.5751	8.9069	8.8952	11.129	7.1342	7.5925	5.766	10.0054	11.7139	12.2748	10.0804	10.7431	10.8913	1561	0
TCGA.BH.A0HX	LumA	8.0655	12.2177	11.4602	6.7507	14.8691	11.8318	5.6159	8.3498	10.4761	0	10.3885	8.9617	10.0876	6.7939	9.1497	11.0442	6.9426	6.4954	11.3704	10.4024	12.982	12.0865	9.9113	11.6073	11.677	829	0
TCGA.BH.A0RX	Basal	7.1	12.925	10.7965	9.5677	15.1379	10.4553	2.5307	8.8036	11.0084	1.283	10.5708	10.1772	11.1416	7.6067	10.7683	9.4445	5.5059	8.3055	1.5417	9.9598	12.8219	11.6251	11.5289	10.3232	10.7817	170	0
TCGA.BH.A0W3	LumB	8.9968	11.6912	8.4427	6.1222	14.0835	12.1615	1.862	7.4898	10.6086	0.5253	10.9021	9.8697	8.0626	7.0384	9.312	11.1581	6.9942	7.808	5.6618	9.1249	12.0956	11.5527	9.8264	11.0297	10.8189	728	0
TCGA.BH.A0W4	LumA	7.7216	12.4825	12.9449	7.5204	14.4474	11.299	2.6144	7.0684	10.8766	0.7141	9.6094	10.5181	10.6617	6.1849	9.075	10.8825	7.3377	6.813	5.1532	9.4814	12.1157	10.9137	9.7961	11.1859	10.089	759	0
TCGA.BH.A0W5	LumA	8.7437	12.0348	11.3198	7.6431	14.5063	10.7017	3.1105	8.5013	10.4847	1.6242	9.7119	10.2417	10.5564	5.8122	9.0009	11.0315	7.2146	7.8656	10.2086	9.6213	11.8633	11.1124	9.8404	10.9032	10.4636	1288	0
TCGA.BH.A0W7	LumA	9.5967	12.5555	10.2386	6.5475	14.7859	10.9925	2.5682	8.1751	11.1405	0.4966	10.1301	10.718	10.4246	6.0265	10.6265	10.6201	6.736	7.6159	9.5595	9.4695	12.3748	11.0728	9.8957	11.0436	11.0087	1363	0
TCGA.BH.A18F	LumA	8.341	12.0191	11.8836	8.4711	14.6873	11.0108	2.0491	6.8767	10.2044	0.8356	10.4796	10.4516	10.767	6.3911	9.2616	10.9637	6.9518	6.9518	6.0124	9.5656	12.7283	10.6816	10.0351	11.0029	10.8447	1001	0
TCGA.BH.A18G	Basal	6.5177	12.7979	11.6672	7.2677	14.7632	10.7332	0	9.1589	11.1056	1.5236	9.6389	10.1695	9.5886	5.0218	9.939	9.4234	5.4429	8	8.0587	9.9636	12.5214	13.3268	11.1794	11.2113	11.0741	149	0
TCGA.BH.A18H	LumA	8.027	12.1811	10.4298	7.9685	15.37	11.1436	1.6184	7.8506	10.4276	1.3521	8.9672	9.985	8.9189	6.1642	10.4481	10.8064	6.5088	7.4632	12.0388	9.6479	12.1976	11.3814	10.3231	11.2419	11.0364	652	0
TCGA.BH.A18J	LumA	8.134	13.6458	11.5565	5.4587	14.8513	11.7709	3.477	8.2855	10.5035	0	10.2832	10.5815	9.7995	6.283	8.8461	11.1782	6.4366	6.7818	9.8516	9.8701	12.5026	11.6505	10.1991	10.953	10.7735	612	1
TCGA.BH.A18L	LumB	8.5192	12.0462	8.664	5.6062	15.1773	10.7504	11.5667	7.7969	9.9572	0	10.3805	10.1548	7.1201	7.5785	9.9458	11.8667	7.4677	7.0181	11.7616	9.4135	12.1145	12.2687	9.2601	11.4348	12.9998	811	1
TCGA.BH.A18M	LumA	8.1948	12.137	11.6689	8.5757	15.2569	11.0761	4.3809	7.2194	10.4532	0.7946	9.7091	10.2799	11.3032	6.1579	10.2309	11.6282	6.8712	7.1163	2.5298	9.7891	12.4341	10.9935	10.0858	11.2011	10.2441	2207	1
TCGA.BH.A18N	LumA	8.3757	11.8136	10.1853	4.8035	14.9975	10.8498	6.5651	8.5654	10.5704	3.3107	10.1483	10.1721	7.6392	6.2292	9.3653	11.771	7.2015	7.3022	4.0984	9.4751	11.9274	11.4649	9.4938	11.1294	9.6627	1148	1
TCGA.BH.A18R	Her2	5.1486	11.6924	11.2846	6.7622	15.6708	11.4159	1.8776	6.982	10.2653	0.3754	11.692	10.7874	10.2741	5.3859	8.9844	10.7079	7.3015	7.3615	5.3513	10.0504	13.1416	11.3013	10.139	12.5308	11.481	1142	1
TCGA.BH.A18S	LumA	8.8924	12.6316	11.7013	12.7067	15.1829	10.4934	8.3208	7.8594	10.3445	3.9724	8.9277	10.0456	7.738	6.0767	8.306	11.1361	7.1854	7.7993	4.9411	9.7064	11.6563	11.7194	10.1702	11.5565	10.7142	2009	1
TCGA.BH.A18U	LumB	7.9599	12.0455	11.6257	5.5054	14.4979	11.2068	9.6101	8.2753	11.6383	0	11.5265	9.895	9.6278	7.9068	10.0947	11.0402	6.5951	7.1925	8.8933	10.2046	12.5434	11.4172	10.4787	12.1424	11.7552	1563	1
TCGA.BH.A1EN	Her2	7.7862	12.2414	12.7363	4.5676	15.2357	10.2861	0.3978	8.1574	10.6095	7.819	9.5182	10.1652	10.1246	5.2652	7.7138	10.8078	6.0534	7.4222	15.728	9.382	13.3201	11.9775	11.0472	11.1239	11.384	2127	1
TCGA.BH.A1ES	LumA	7.2227	12.1151	12.2682	6.0749	15.4967	10.7529	3.0664	7.7696	10.2261	1.7904	10.5012	9.9518	10.4922	6.2279	9.3806	10.737	6.9247	6.8752	3.641	9.5699	12.4186	11.0883	10.287	11.1103	9.9494	3462	1
TCGA.BH.A1ET	LumA	9.2066	12.1167	10.6779	7.4204	14.3509	10.5867	6.8628	7.1099	9.4212	0.2813	8.7103	10.1521	10.2487	5.553	9.3997	11.5989	7.1009	7.1844	9.475	9.7985	11.544	11.1893	10.2338	11.379	10.3126	2520	1
TCGA.BH.A1EX	LumA	7.5103	11.6747	12.6972	7.3403	14.9345	10.5812	0.9593	8.21	9.7789	0.9593	9.3301	10.2579	11.549	5.8972	9.1583	11.2056	6.881	7.1824	9.9454	9.4959	12.3167	11.6893	10.3917	11.1085	9.7033	1508	1
TCGA.BH.A1FC	Basal	5.4189	11.9389	12.2502	4.3362	15.3711	11.1453	5.6307	7.8486	11.2876	0.9128	11.3918	10.7146	9.0875	8.3335	9.795	10.3928	6.5678	7.2305	3.3806	11.8849	13.2071	11.3881	10.0966	11.4961	11.7251	3472	1
TCGA.BH.A1FG	LumA	9.8417	12.4721	9.6018	5.9536	15.5771	9.9343	1.0652	7.9106	10.6244	0	9.2789	9.6025	8.5933	6.2174	10.0449	11.0128	6.5299	7.5019	3.6193	9.8973	12.2995	11.5544	10.4129	11.4536	9.8588	3736	1
TCGA.BH.A1FL	LumA	8.8901	11.8554	11.2341	6.3546	14.584	10.9947	0.6245	6.8594	10.2845	0.8581	10.0784	10.5993	9.0751	6.3607	8.3368	10.9735	7.7971	8.062	7.312	9.6331	11.3679	10.9371	10.1133	11.1346	10.1298	1673	1
TCGA.BH.A1FN	LumB	6.748	12.4613	11.5208	5.7696	15.0812	10.7663	0.98	7.3862	10.1539	0	11.1993	9.7847	11.1632	6.8239	11.5522	10.6877	7.7353	6.3696	7.8085	10.3892	12.4414	11.0164	9.7966	11.7517	11.1502	2192	1
TCGA.BH.A203	Her2	7.3395	12.6347	11.2269	6.5402	14.2705	11.5035	0.442	7.8369	10.9509	1.2833	9.6414	9.7867	10.2068	6.9633	8.7133	10.5752	7.4485	6.4671	6.7526	9.5608	12.5214	12.3653	10.1963	12.3755	11.7834	1174	1
TCGA.BH.A204	LumB	3.2324	11.1272	11.4109	5.7564	15.3836	10.117	0	8.6619	8.4913	0.2951	11.076	9.4477	9.4109	7.9042	8.7459	11.8984	7.0266	5.3478	9.1958	10.0537	12.2249	10.698	10.4602	12.3915	11.6998	2534	1
TCGA.BH.A208	NA	6.6364	13.0484	12.7281	7.7556	14.4552	10.7571	0	7.1159	10.0895	0.5219	8.1773	10.2997	12.6829	6.063	9.3028	10.1016	6.4902	6.7043	9.5963	9.8469	12.0923	10.7527	10.32	11.0323	10.4528	1759	1
TCGA.BH.A28O	NA	6.9734	12.1137	12.0452	9.5929	14.4599	11.3214	0	7.4139	11.1151	1.0726	9.1995	10.3844	11.8432	5.8099	9.4984	10.2073	7.4718	8.0778	10.7649	9.4769	11.6035	11.5484	9.5396	10.6248	10.0585	1120	0
TCGA.BH.A2L8	NA	7.3445	12.2211	10.9858	6.7081	14.6396	10.8916	5.796	7.9726	11.4337	1.2844	9.1354	10.359	10.3077	6.6798	9.7115	10.7661	6.1127	7.7259	5.6896	9.5189	12.4328	11.5349	10.3805	10.8746	10.5382	612	0
TCGA.BH.A42V	LumA	8.7591	12.1711	10.7787	9.0111	14.841	11.3308	3.0491	7.5265	11.2903	1.7349	9.2703	10.7308	11.0228	6.5931	9.3171	10.3633	7.3525	8.0275	6.1528	9.5115	12.0794	11.7924	9.8032	10.7219	9.9666	635	0
TCGA.BH.A5IZ	NA	4.8317	13.6553	11.9691	3.9118	15.8015	11.1873	1.4143	10.2766	11.2204	1.6237	11.5638	10.6182	8.6259	6.9515	10.6078	9.981	7.2091	7.7758	12.4257	9.4366	12.9983	12.6992	10.6277	10.7891	10.5202	567	0
TCGA.BH.A8FZ	NA	8.107	12.4995	11.6146	8.3014	14.878	11.5564	3.1668	8.2372	10.4234	0.8798	9.5983	10.3648	10.9069	6.6201	10.6586	9.9399	6.6396	7.7581	12.4294	9.9902	12.7014	10.9796	10.2506	11.3047	10.5003	574	0
TCGA.C8.A12K	Basal	5.5343	12.8277	12.3688	6.5582	14.6166	10.8248	5.3282	9.0287	10.6638	2.712	11.9273	10.043	9.3312	7.0329	11.0006	10.2202	7.0386	6.8198	5.6716	11.1781	13.2481	11.6756	10.9778	11.4688	10.8877	NA	NA
TCGA.C8.A12L	Her2	5.906	12.4741	12.6123	6.1487	15.6293	12.4008	3.5946	7.8709	11.8271	1.9146	10.3911	9.407	9.1007	6.9396	10.7339	10.602	7.7984	7.0994	9.2462	10.1805	13.4945	12.0619	10.0875	12.6017	11.9744	363	0
TCGA.C8.A12M	LumB	6.1661	12.0285	10.1607	5.6904	16.0076	10.367	5.9578	6.7078	9.7966	0	10.1437	9.974	7.0056	7.0476	7.6708	11.6343	7.1506	7.0607	4.589	9.9717	11.8259	10.7078	10.5261	12.1952	10.8101	358	0
TCGA.C8.A12O	LumA	8.6715	12.4511	12.8978	6.0507	14.8011	10.7654	0	8.5064	10.5373	1.2763	9.8305	9.3281	11.5447	7.2858	9.402	10.8944	6.788	7.353	11.045	10.2545	12.7192	11.9252	9.8333	10.8672	11.8674	385	0
TCGA.C8.A12T	Her2	9.3232	12.7273	11.7217	4.567	15.6424	11.2414	2.0396	7.3664	11.3642	0.5306	11.0828	10.0476	10.732	6.7302	9.0995	10.2581	6.5665	7.1396	7.3895	9.4506	12.9782	12.0946	10.151	11.4406	10.31	NA	NA
TCGA.C8.A12V	Basal	6.1773	13.1135	13.041	8.3066	15.0154	10.6489	3.3683	9.2804	11.0624	2.2171	10.7331	10.2684	10.1591	6.6751	11.0964	9.8724	6.1854	7.484	1.1483	9.8916	12.4811	10.9111	10.2483	10.5277	10.7775	385	0
TCGA.C8.A12W	LumB	8.0692	11.9644	12.5266	5.3253	15.8181	10.8251	5.1855	7.9882	10.5115	0.8978	11.2424	9.3852	11.4958	7.7972	8.5598	10.7417	7.5767	7.9383	11.7878	9.2648	12.1577	12.2165	9.1021	11.355	11.3354	385	0
TCGA.C8.A12X	LumA	8.6552	13.0382	9.4112	5.1266	15.3551	11.5373	5.9239	8.4947	11.1757	0.7819	10.447	10.7754	7.8907	7.1384	10.5538	10.5682	6.3753	7.6091	4.4971	9.3741	12.0692	11.8557	10.0091	11.1296	10.9419	385	0
TCGA.C8.A12Y	LumA	9.2188	12.5228	10.6911	5.4608	15.2489	12.1255	7.1112	7.7502	10.8668	0	10.4716	10.6892	9.1812	7.3723	10.0119	10.1053	6.7082	7.9552	10.3184	9.7382	12.0589	11.7415	11.2282	11.0659	9.7471	1476	0
TCGA.C8.A12Z	Her2	8.5401	11.8056	12.0108	3.822	14.9711	11.7068	0.577	7.2334	9.9221	0	10.2842	10.0264	9.6412	5.4922	8.1408	10.9427	6.7574	7.812	12.4937	8.8707	12.533	12.6149	10.3884	11.9136	11.4092	382	0
TCGA.C8.A130	LumB	6.9843	13.0078	10.3321	5.8211	14.9659	12.3608	2.1426	7.8469	11.1767	1.3323	12.4565	10.8744	9.8263	8.0062	9.3526	10.0655	8.4889	7.5348	6.4641	10.0455	12.42	12.3786	10.8288	11.3142	10.3789	370	0
TCGA.C8.A131	Basal	8.6523	13.1475	12.9133	5.234	15.1851	10.8309	2.5391	6.7527	11.3748	0.9727	10.158	10.6226	9.8529	7.4452	8.0138	8.9006	5.6056	8.1274	10.4664	10.0317	11.6344	11.9831	10.6552	10.9813	9.6357	411	0
TCGA.C8.A133	LumA	8.6784	12.7892	9.4426	3.4582	15.0918	11.2818	7.6427	8.0188	11.3724	3.5876	9.0197	10.4055	4.1277	5.7744	8.8482	11.1255	6.2217	7.8305	2.3127	9.8988	12.3817	11.9303	10.3264	11.3834	10.8661	NA	NA
TCGA.C8.A134	Basal	6.5476	12.2703	12.8088	9.5506	15.5383	10.1383	1.3117	8.9216	11.0933	0.5094	12.0788	10.5934	8.5331	7.8772	10.4345	10.1293	6.7256	7.2817	7.4829	9.604	12.4766	11.9923	11.2613	11.6979	11.2915	383	0
TCGA.C8.A135	Her2	7.8743	12.87	13.5031	6.9745	15.5011	10.1947	0	7.5232	10.578	1.2525	10.3434	9.7264	10.7125	5.9884	8.7343	10.3541	6.8663	7.2711	9.2356	9.3903	13.1736	11.9984	9.6922	11.2437	10.6946	393	0
TCGA.C8.A1HG	LumB	7.1323	12.6942	8.9453	5.6025	16.0153	10.0623	13.6292	8.4571	11.0025	1.3023	10.0384	9.4596	9.3095	7.8863	10.0242	10.7872	6.0338	7.7239	9.983	11.3609	12.8475	12.0411	10.558	11.3426	13.3313	345	0
TCGA.C8.A1HI	LumA	9.4325	12.1334	11.0081	8.3233	15.8808	11.0927	5.8369	7.5314	10.312	2.362	9.365	9.9102	11.0578	6.4464	9.6765	11.2102	6.1836	7.7911	6.8665	9.0666	12.6099	12.1699	10.9344	11.6969	11.3121	343	0
TCGA.C8.A1HL	LumB	9.6507	12.4065	10.8531	6.5155	15.3156	10.502	1.0233	7.4764	9.9111	2.4973	10.1514	10.2839	10.538	7.0555	9.0061	10.0355	6.972	7.1956	11.985	9.9002	12.6798	11.6179	11.0426	10.7791	11.7137	317	0
TCGA.C8.A1HM	LumB	6.7676	12.5027	7.9329	6.1689	15.8059	10.581	6.3817	8.4254	10.1964	0.5592	11.114	9.7864	8.1736	7.5162	12.0758	10.1923	7.6899	7.1265	8.6028	9.0852	13.0073	12.4287	10.0475	11.3636	11.6888	375	0
TCGA.C8.A1HN	LumB	8.5952	12.1103	9.031	8.3009	15.0965	11.4348	5.3796	7.9722	10.0032	1.2136	10.5864	9.7269	8.2983	8.2507	9.2475	11.1255	6.1045	7.1161	8.6615	9.9792	11.8715	12.0778	10.707	12.262	12.4381	394	0
TCGA.C8.A1HO	LumA	8.5092	12.3036	9.0253	5.6942	16.2596	9.9371	10.8176	6.7008	10.6966	3.6692	10.4022	10.381	9.0603	6.9808	11.9882	10.7606	6.9974	7.4836	7.7671	9.6302	11.9984	12.4411	9.812	11.6095	10.6391	375	0
TCGA.C8.A26W	LumB	8.8756	11.8982	9.6923	6.8069	14.6454	10.3127	5.4457	7.6854	10.9701	0.6384	11.532	10.3766	10.527	6.6836	11.0753	9.9551	6.9117	7.7315	9.6237	9.868	12.623	10.5101	10.7193	11.6564	10.9235	381	0
TCGA.C8.A26X	Her2	9.2925	13.2641	10.6955	6.3876	14.674	11.2684	2.3601	8.568	11.2649	1.5046	10.2419	9.8622	10.5123	5.9407	10.0639	9.7665	6.2629	8.1542	12.3702	9.0861	12.9578	12.921	10.5533	11.3615	11.1968	376	0
TCGA.C8.A26Y	Her2	8.6925	12.961	11.0238	5.2859	14.5857	9.0868	1.6515	9.6606	10.3511	0.9395	11.2507	9.9976	7.5209	7.4408	9.614	10.1428	6.2929	6.6805	13.1427	10.5918	12.8296	12.3159	10.6443	11.4543	11.8746	394	0
TCGA.C8.A273	LumA	9.0926	13.1136	10.511	5.8851	15.2669	11.3852	0.9107	8.4705	11.0939	0	10.5812	10.0913	10.5908	6.392	9.8268	10.4794	6.5315	7.4578	6.843	9.6653	12.5149	13.1713	11.4542	10.8454	10.6923	513	0
TCGA.C8.A275	Her2	7.4766	12.4502	12.2401	5.4853	15.4779	10.4533	1.9789	8.5973	10.7218	1.1222	10.3659	9.3059	10.1959	5.6881	10.1907	9.9803	6.5687	7.5734	11.3625	9.6671	12.6808	12.9942	10.398	11.2656	10.8777	NA	NA
TCGA.C8.A278	Her2	7.1983	12.7872	10.6277	6.0707	15.375	11.0028	0.9977	8.1736	10.0841	1.4121	10.9181	10.1531	10.9313	6.3048	10.5393	10.5993	6.0899	7.4765	10.7524	9.7685	13.3325	13.1569	10.7027	11.8512	12.5828	297	0
TCGA.C8.A3M7	LumA	6.1136	11.8896	11.7039	9.5332	14.1369	10.9196	0	7.007	10.2763	0.9886	9.132	10.5384	10.5886	6.2239	9.5851	9.9034	7.7142	7.4717	9.9949	9.1628	12.0181	11.0714	10.7707	11.1833	10.6273	1034	1
TCGA.C8.A8HP	NA	7.0992	12.6955	10.2242	5.973	15.5395	10.893	2.5511	9.2609	10.6883	2.9418	10.6984	11.1383	9.7569	7.5291	8.7338	10.2206	6.7213	7.6677	11.1053	8.8158	11.5494	11.5861	10.3665	11.3807	10.4887	396	0
TCGA.C8.A8HR	NA	8.5224	11.8134	11.3153	8.3857	14.6683	11.4379	1.4574	8.9338	12.4512	2.1675	10.5508	10.4423	11.0871	7.4594	10.665	9.8135	6.9655	7.9848	7.0344	9.8508	13.0299	11.75	9.6077	10.9673	10.7442	408	0
TCGA.D8.A13Y	LumB	7.3168	11.4704	9.8181	6.5528	14.3645	12.66	12.7878	8.1155	9.6811	0.449	12.179	8.8439	7.1558	8.4408	8.8824	11.0522	7.3002	7.925	3.1749	10.5436	12.7243	11.8685	10.2875	11.1962	11.0709	1728	0
TCGA.D8.A141	LumA	8.0671	12.2652	12.3803	6.2197	14.774	11.0661	4.6919	8.7432	10.7061	1.4339	9.1713	10.2	11.4379	6.0754	9.4605	10.7668	6.8543	7.6834	3.4868	9.6387	11.8422	11.4824	9.7794	10.8654	10.4395	626	0
TCGA.D8.A142	Basal	6.9352	12.3886	13.0894	6.7705	16.7822	11.1233	0.8454	7.3653	10.7524	1.5156	10.2669	10.213	10.7956	7.8933	8.5404	9.7663	6.6256	6.929	10.825	10.3188	12.1079	11.848	9.9968	11.1014	10.8678	425	0
TCGA.D8.A1J8	LumB	7.519	11.3653	10.4135	6.2899	14.4148	10.2651	6.0604	7.8035	9.2116	0.6302	9.3954	9.6536	10.5179	5.399	9.8316	10.4792	6.9185	5.6759	11.4651	10.1487	12.9657	10.1081	10.7269	11.968	12.3128	431	0
TCGA.D8.A1J9	LumB	8.3122	13.2857	11.6524	5.8428	14.8777	11.974	3.6453	7.7056	10.2255	1.3617	10.5595	9.4253	9.8074	5.6929	10.3507	11.0309	6.8177	6.9137	13.0007	9.4855	12.5313	11.2116	9.9181	11.6141	12.0154	532	0
TCGA.D8.A1JA	Her2	8.3161	12.2765	12.9015	6.2462	15.0537	10.2165	1.2353	6.5655	8.7078	0.3459	9.5094	9.8574	12.036	2.3306	10.8652	10.536	6.4893	6.6022	9.7557	9.0652	11.9996	10.8227	9.8137	12.5578	10.9478	502	0
TCGA.D8.A1JF	Her2	9.078	12.1937	11.1037	5.6988	14.881	11.0479	0	6.8769	9.7959	0.9027	8.6255	9.199	10.2748	5.3584	8.2337	10.9641	6.0618	6.573	10.0596	10.2353	13.6185	11.8102	10.3008	11.9787	11.8692	366	0
TCGA.D8.A1JG	Her2	7.2827	11.7405	13.3579	5.0407	15.6685	11.0174	2.1254	7.9057	10.5762	1.3518	10.1255	9.7593	10.5649	7.6837	10.467	11.0538	6.2287	7.0377	10.34	9.4582	13.0442	11.3983	9.2979	11.441	11.4247	1612	0
TCGA.D8.A1JH	LumA	7.9059	11.8771	12.2655	7.2621	15.1261	10.9838	1.8274	8.3644	10.4791	0.8194	9.2115	10.122	10.8767	6.2724	9.2663	10.8803	7.4103	7.5015	7.5415	9.365	11.9362	11.0461	9.6325	10.9612	10.4899	426	0
TCGA.D8.A1JJ	LumB	7.5731	12.4472	11.3051	5.0516	15.4599	11.3505	0.9126	7.8773	10.2794	0.3719	10.7533	10.2753	10.9339	6.5003	9.4546	11.7727	6.6499	7.3441	9.9116	9.9054	12.4529	11.9696	10.2305	11.7052	11.4794	611	0
TCGA.D8.A1JK	Basal	7.8615	13.2064	12.508	5.1972	15.3542	10.7455	1.539	7.6587	11.3239	0.9656	10.6576	9.8782	10.5092	6.2493	10.2963	10.1092	6.4858	7.512	10.8912	9.5052	13.3411	12.1923	10.3083	10.6033	11.1647	612	0
TCGA.D8.A1JL	Basal	6.1229	12.9032	12.8089	9.3069	15.881	11.0553	2.9717	9.0452	9.8057	1.7843	10.6178	10.4692	10.9384	6.4838	11.4696	10.2654	6.9763	6.8567	4.8391	10.4978	12.0899	10.7121	10.3028	11.2226	11.4971	611	0
TCGA.D8.A1JM	Basal	6.066	12.6981	11.8153	3.9904	15.4478	10.8356	1.9117	7.1978	10.2906	7.6997	11.781	9.3448	5.0413	6.8689	9.7152	10.7792	9.1219	7.663	12.9528	10.0237	12.9789	11.1679	10.8431	12.6835	10.9686	590	0
TCGA.D8.A1JU	LumA	8.1468	11.9243	12.2846	8.5382	14.093	10.7541	1.9304	7.8217	10.4921	0.3922	7.9273	9.9971	11.3648	5.4117	9.6024	10.6219	6.9562	7.3962	2.9769	9.4077	11.7629	10.7822	9.5546	10.8521	10.399	447	0
TCGA.D8.A1X5	LumB	8.9006	12.2542	10.866	5.2569	15.9971	12.864	0	8.1306	10.0874	0	11.3255	10.1385	9.7273	5.1699	9.4084	11.3321	6.0731	6.8604	11.2026	9.5051	11.3228	12.152	9.4167	11.5543	11.5062	565	0
TCGA.D8.A1X8	LumA	8.1415	11.7362	10.5389	7.3141	14.7569	10.7703	1.5409	8.1431	10.2246	0.9671	9.472	10.2292	10.56	5.9805	9.3584	11.1374	6.5779	7.5361	4.4599	9.8166	12.2406	11.2431	10.1225	11.6602	10.1067	783	0
TCGA.D8.A1X9	LumA	8.4783	12.6716	12.5216	8.0875	15.3774	11.329	5.0932	7.9797	10.517	0.3253	10.4944	10.2421	10.644	8.1492	10.643	11.5646	6.8046	7.5714	6.5674	9.557	12.0575	11.7693	9.9736	11.4594	11.8138	727	0
TCGA.D8.A1XA	LumA	7.8263	12.4437	10.4244	11.3234	14.4464	11.7968	1.3911	8.6357	10.7827	0	10.4547	9.2506	9.6319	6.8413	9.9124	10.8729	7.5733	7.8795	4.9739	9.0354	11.7748	11.0475	9.4802	11.8003	11.6818	839	0
TCGA.D8.A1XC	LumA	7.5018	12.3631	9.0372	10.5968	15.0981	11.4906	11.8852	7.2055	10.1599	1.6845	8.8083	9.7207	7.2112	6.1052	9.413	11.1624	7.0012	7.2011	3.7442	9.8074	11.3651	10.6768	9.412	11.1373	10.9846	377	1
TCGA.D8.A1XD	LumA	7.9873	11.8931	13.1288	6.9695	15.0701	11.0497	1.2091	7.1916	10.4484	1.2091	10.2678	10.3748	10.5603	6.5389	7.6182	11.1074	7.5458	7.7471	4.4003	9.6757	10.8909	10.7664	9.5867	11.1051	10.3767	522	0
TCGA.D8.A1XF	LumB	6.8748	11.2659	11.2926	4.9282	15.3667	12.3912	9.0414	9.3771	10.6245	0.4323	11.1471	10.0037	7.2276	8.6687	10.0922	10.6232	7.0061	7.041	11.9828	10.0266	11.2405	11.7847	9.5948	10.866	10.7866	463	0
TCGA.D8.A1XJ	Her2	6.5685	11.8447	11.0921	5.4645	15.4115	11.6219	1.3276	7.9472	10.5683	0.3807	12.1886	10.1251	9.8447	6.1233	10.1266	11.2658	6.0092	6.9317	12.2846	9.2908	13.2218	11.0583	10.7803	12.1183	10.6017	664	0
TCGA.D8.A1XK	Basal	4.9857	12.4613	11.6643	9.4978	15.753	11.0821	0.6258	7.5984	10.9373	1.0608	12.0498	11.0746	9.9262	9.1429	11.2622	9.8848	7.3616	5.6085	8.0524	11.9448	13.8153	11.2404	10.6612	11.6861	10.8813	441	0
TCGA.D8.A1XM	LumA	8.7198	12.2847	12.9248	7.7319	14.9493	11.2274	7.6616	7.9128	10.4054	1.7542	10.0029	10.2572	10.7136	6.8229	10.2441	11.3334	5.9461	7.3803	2.9246	9.5157	11.9457	11.6123	9.346	11.3378	10.9278	538	0
TCGA.D8.A1XQ	Basal	6.9749	12.2293	12.6704	8.1576	15.0011	10.9154	1.4422	8.2939	10.4589	1.5867	12.0254	9.9979	12.4629	6.4911	9.6112	9.8198	5.1667	7.5228	5.0593	10.4094	11.4291	11.7928	10.207	11.282	11.3847	499	0
TCGA.D8.A1XT	Her2	6.9728	12.0046	14.4952	4.723	15.1448	11.7499	0.8429	8.0529	9.8415	1.3715	10.8988	10.9593	10.4438	6.3988	11.3168	10.8567	6.0545	7.9143	5.0449	9.5512	12.1507	11.7471	10.5365	12.2736	13.073	506	0
TCGA.D8.A1XU	LumA	7.9191	12.472	11.2965	5.6894	15.043	11.431	3.4256	8.2826	10.7192	0	9.512	9.7342	9.9603	5.9623	9.0407	11.2544	6.9964	6.8607	10.724	8.892	13.205	10.7437	9.6883	11.4113	10.9145	395	0
TCGA.D8.A1XV	LumA	8.213	12.5567	8.9104	10.4037	15.3281	11.0097	11.6507	7.1926	9.9695	2.3566	9.3696	9.9273	7.8638	7.104	8.747	11.5423	6.9316	7.1876	2.0325	10.08	11.971	11.0631	10.6025	11.8552	10.6744	461	0
TCGA.D8.A1XW	NA	4.9161	12.0212	13.1949	8.9563	18.0717	10.7447	0	8.3674	9.8797	1.3247	9.0944	10.0413	10.0212	6.2097	9.4365	9.8971	6.5637	7.4308	1.14	10.1859	12.416	10.0012	9.9897	10.9456	11.1841	1309	0
TCGA.D8.A1XZ	LumB	7.2085	12.519	10.7916	4.3667	16.0046	10.7317	5.5625	7.686	9.7134	1.085	10.6683	10.3413	9.8851	6.6339	9.2833	10.7794	7.1725	7.9294	7.0219	10.515	12.7556	10.5948	11.0209	11.4145	11.9711	466	0
TCGA.D8.A1Y0	LumA	6.916	12.1078	10.9399	7.7401	15.5164	11.3955	1.8139	8.298	10.3012	0.8113	10.6222	10.4087	10.2114	7.128	10.0903	11.6538	7.5406	6.6384	6.713	9.968	12.3485	10.9483	9.9996	11.3173	10.8253	472	0
TCGA.D8.A1Y1	LumB	9.1615	11.8417	11.4143	4.9718	14.9792	10.7955	9.1514	8.1761	10.6478	0.3413	10.2053	9.5668	10.666	6.9712	8.7406	11.0112	7.0935	7.281	11.3864	10.2079	12.7009	11.4589	10.7389	10.9155	10.8516	302	1
TCGA.D8.A1Y2	LumB	8.0443	12.7055	10.9076	5.6824	15.0119	11.5637	4.6524	9.3296	10.4664	1.4082	10.6028	9.9668	11.7457	7.0878	10.0329	10.9862	6.6378	7.6305	10.6271	9.9247	12.7505	11.4147	10.4725	11.4207	10.4862	433	0
TCGA.D8.A1Y3	LumB	8.3021	12.5458	8.2611	3.8814	16.4009	10.7927	0.7059	7.8101	10.8048	0.3957	12.0934	10.5647	8.1541	8.7356	10.5219	10.0344	6.6315	9.0042	4.7141	10.1859	13.0828	12.0505	11.8356	12.189	10.8247	430	0
TCGA.D8.A27I	LumA	7.4821	11.9182	11.4732	8.8654	14.9032	11.1502	5.7716	8.1016	10.4482	1.1149	9.779	10.1706	11.3344	6.0188	9.6978	11.1562	7.5193	7.5843	4.8277	9.5819	11.7333	10.9001	10.1732	11.0511	10.8901	439	0
TCGA.D8.A27N	LumB	7.7649	12.7238	11.2627	5.0238	14.4731	11.8644	1.9926	8.165	10.9551	0.995	9.6267	9.5529	11.2162	6.1858	9.975	10.5094	7.2412	7.4739	10.2631	10.0203	12.9556	13.4906	10.2309	10.2963	11.4238	519	0
TCGA.D8.A27P	LumA	8.2572	12.2825	12.2173	6.852	14.3416	10.7097	0.4792	6.8973	10.5898	0.4792	9.2715	9.9111	10.3108	5.4201	8.8456	10.8062	6.9256	7.5916	7.8351	9.5561	11.9	11.103	9.7904	11.1232	10.1703	49	0
TCGA.D8.A27R	LumB	8.0271	12.7625	9.8731	6.2857	16.0909	12.2467	0	8.5005	10.4708	1.2443	10.4624	10.6034	10.5043	7.3081	9.2099	10.5942	6.6577	7.6698	12.1333	9.7156	12.6551	12.9152	10.4438	11.6939	11.9643	307	0
TCGA.D8.A27T	LumA	8.4092	12.2315	10.7012	7.1313	14.0188	11.4086	9.2673	8.3561	10.7762	0.4132	10.0726	10.2642	10.7055	7.0698	10.9678	11.1971	7.0802	7.4685	7.9527	9.7773	12.7634	11.1637	10.1275	11.2583	10.1479	398	0
TCGA.D8.A27V	LumA	8.5449	11.7451	11.5641	8.1604	15.4449	10.0148	0.7042	6.201	9.8419	1.4211	9.4321	10.2182	11.4401	4.5422	9.6436	11.2	6.6521	7.3682	10.2354	9.7831	12.1355	11.0079	10.2481	11.2414	10.5808	381	0
TCGA.D8.A27W	LumB	8.2713	12.5323	11.5706	6.9885	15.247	10.7984	6.0664	8.3483	10.4344	0	10.7617	8.9224	10.1345	7.3396	9.6615	11.3268	6.6494	7.4471	12.1248	10.0366	12.3318	12.4172	9.7509	11.8657	11.956	373	0
TCGA.D8.A4Z1	LumA	7.8546	12.1249	11.9415	9.2132	14.0671	11.5726	2.9397	7.7346	10.8954	0.5977	8.9581	10.3782	11.428	6.0805	9.5914	10.3743	8.2101	7.4169	2.1994	9.3335	11.6726	11.2251	9.354	10.663	10.0469	659	0
TCGA.D8.A73X	NA	9.3424	12.0644	11.686	5.3449	14.3405	11.0033	6.7824	7.6297	10.7793	0.7687	9.6673	10.386	10.0742	6.6874	9.2955	10.8268	7.5316	7.5722	7.5095	9.3494	11.303	11.2446	10.0883	10.8952	9.9814	767	0
TCGA.E2.A108	NA	7.944	12.4171	11.732	9.0276	14.504	10.7005	2.1571	9.0177	10.7016	1.449	9.695	10.0265	11.7618	5.5856	10.1914	10.2078	6.7657	7.6025	8.4244	9.6177	12.1587	10.8956	8.747	11.1347	11.0928	837	0
TCGA.E2.A10B	LumA	7.8095	11.848	10.9869	6.0242	14.9395	11.5397	3.6947	7.8113	10.4941	0.6498	10.1831	10.0116	10.3845	5.9865	9.5945	11.7364	7.413	7.3726	7.3996	10.1707	12.487	11.2376	10.0474	11.1992	11.4993	1141	0
TCGA.E2.A10E	LumA	8.7003	11.4019	10.3153	6.9847	14.9774	11.5403	1.6746	7.2972	10.247	1.1717	9.7399	10.2688	9.2282	6.3322	10.1777	10.6714	7.1749	7.1234	7.9254	8.9736	11.9607	10.9364	10.2128	11.4507	10.574	865	0
TCGA.E2.A10F	LumA	7.7504	12.0311	11.9139	6.8209	14.6921	10.7994	8.5556	8.4665	10.6374	0.7879	9.9959	10.2528	10.7871	6.7026	9.766	11.1627	7.7382	6.939	4.556	9.7816	11.939	11.162	9.907	11.286	10.1624	878	0
TCGA.E2.A14S	LumB	8.422	12.476	8.5045	5.9432	14.9138	12.6613	4.8711	8.4721	10.8188	0.9499	10.0551	10.2156	8.0663	7.1515	8.834	10.9931	7.2738	7.4144	5.1488	10.1182	11.5851	11.1268	10.2175	11.503	10.5046	1009	0
TCGA.E2.A14U	LumA	8.4176	11.9507	11.6423	8.1845	14.6396	11.5035	1.1677	7.4733	11.1364	0.9523	8.8339	10.4164	9.6994	5.7591	8.6186	9.8114	7.4733	7.9146	2.1467	9.6964	11.7984	11.8038	9.5116	10.5271	9.9958	1318	0
TCGA.E2.A14V	Her2	7.9303	12.3033	11.0804	5.6478	15.0016	10.2704	5.666	7.5513	10.7498	0.7306	11.3037	10.0178	9.6505	6.1046	8.9697	11.0867	7.4917	7.3705	11.0039	9.6745	13.1714	12.9898	10.5897	11.737	10.4206	1042	0
TCGA.E2.A14X	Basal	6.5791	13.2126	12.6696	6.5909	15.6018	10.6737	1.1688	7.2971	10.7791	0.5843	10.853	10.9499	10.4168	6.0251	9.0512	10.6305	6.3643	7.7242	11.2671	10.7663	12.7944	10.8927	10.1556	11.3109	12.3061	972	0
TCGA.E2.A150	Basal	7.1725	13.0953	13.2775	5.8525	17.4207	11.1547	1.3889	7.9392	10.4192	0.8555	9.5984	10.2502	9.7698	6.3939	10.9453	10.0411	7.3584	6.9963	2.0832	11.0139	12.7177	10.7957	10.334	11.2517	10.9388	1935	0
TCGA.E2.A152	Her2	7.4194	12.6013	13.1105	5.7311	15.0126	11.3284	1.1292	7.4556	9.8876	0	10.0564	9.938	10.3766	6.1804	9.2425	10.3985	5.9061	6.7792	9.921	8.827	12.6129	10.5528	10.2266	11.3631	10.9726	2128	0
TCGA.E2.A155	LumB	6.3067	12.1141	10.7399	4.7557	15.4656	11.4692	5.0269	7.7774	10.7422	1.09	10.5282	8.7852	9.6249	6.7981	8.9968	10.7212	6.0235	6.7728	6.7728	9.6994	11.7221	12.597	9.8129	11.4123	11.6296	640	0
TCGA.E2.A156	LumA	7.9201	12.0789	9.0144	4.6574	14.3873	11.0258	9.1299	6.3083	10.3809	0.7806	9.6784	10.1848	6.4582	5.783	8.185	11.1851	7.286	7.606	5.5306	9.4502	11.8844	11.4623	9.7342	11.2293	10.3894	726	0
TCGA.E2.A158	Basal	5.5417	13.4275	13.0838	3.9559	15.2306	11.01	7.2264	6.3615	10.041	1.0202	11.6277	10.442	8.3599	5.657	8.9648	9.986	7.2683	7.6497	10.742	9.6724	12.4843	11.5111	11.0003	11.2527	11.823	450	0
TCGA.E2.A159	Basal	7.0414	12.5953	11.5424	5.4766	15.2398	10.9797	0.7776	9.2811	10.2224	1.4781	11.152	10.683	10.5185	7.1934	9.8842	11.1183	5.9309	6.8492	9.4775	10.3761	12.7276	11.6468	10.6896	11.3762	10.7614	762	0
TCGA.E2.A15A	LumB	8.2763	12.0924	10.4539	5.26	15.6752	10.671	6.0432	9.0239	10.0752	0.4004	10.7401	10.5295	10.4725	7.2768	9.8081	10.8091	6.8759	7.4751	7.6621	10.023	12.2843	12.0053	9.8911	11.0673	11.5607	710	0
TCGA.E2.A15C	LumA	9.0229	11.8073	12.115	6.4928	14.5527	10.855	1.1375	6.9284	10.2921	0.4854	9.7579	10.2698	10.4918	5.8695	8.3174	11.2371	7.3593	7.5804	8.6589	10.0787	11.0761	11.0643	9.5434	10.9308	10.1285	694	0
TCGA.E2.A15G	LumA	8.9792	11.6783	9.7078	5.4837	14.8282	11.005	7.8816	7.7002	10.2964	0.4955	9.7849	10.4241	7.5646	6.0053	8.6504	11.2611	7.6715	7.841	5.9462	9.6427	12.0547	11.3555	9.9731	11.1963	10.7224	554	0
TCGA.E2.A15I	LumA	7.836	11.8171	10.4742	7.0829	14.8289	11.2557	4.2757	7.387	10.1171	0.771	8.6884	10.6497	10.4667	5.847	8.8823	11.1955	8.0588	7.068	4.017	9.5986	11.6763	11.0523	10.1193	10.9325	9.5894	1692	0
TCGA.E2.A15J	NA	8.5691	12.1168	10.6329	4.0633	15.2085	11.1554	0.4366	7.7034	10.8701	0.4366	9.371	10.2686	7.5729	5.8376	8.3922	11.3439	7.47	7.8026	8.3429	10.0109	12.2554	12.1057	10.1434	11.4023	10.0761	1640	0
TCGA.E2.A15K	LumB	9.0796	12.0948	9.5165	6.1982	14.691	10.3767	1.3397	7.4397	10.4908	1.1031	10.8933	10.053	9.3637	7.1639	9.3631	10.5898	7.2855	7.9422	11.3318	9.5419	12.2285	11.984	10.1225	10.7011	9.8406	275	0
TCGA.E2.A15L	LumA	8.4098	12.1157	11.3379	6.0226	14.7885	11.1422	2.2715	6.5372	10.3793	0	10.1611	10.0698	10.3526	6.6045	8.2421	10.7576	7.1786	7.3407	11.355	9.759	12.2131	11.3785	9.8305	11.328	10.573	626	0
TCGA.E2.A15M	LumA	7.4739	12.1944	11.1094	8.8582	15.2054	10.4097	5.3797	8.2322	9.8301	2.172	9.1024	10.2469	11.2778	5.7366	10.3437	10.9983	6.8333	6.7883	8.8537	9.7937	12.6618	10.8277	9.9723	11.4632	11.1589	336	1
TCGA.E2.A15R	LumA	7.6375	10.7343	10.2	6.0643	15.7857	10.0772	8.9937	8.3571	10.147	0.5575	10.9478	9.9775	8.3897	7.3704	7.5675	11.7928	6.9463	7.7666	5.027	9.9839	11.7181	10.9786	10.047	11.9705	9.2234	1732	0
TCGA.E2.A15S	LumB	8.034	11.1721	9.8604	6.6369	16.2623	11.978	11.0483	8.3215	9.7105	0	10.9632	11.0178	8.5962	8.5356	8.1998	10.959	7.6807	7.1891	11.3866	10.0251	12.0451	11.9174	9.7404	11.7027	11.7401	428	0
TCGA.E2.A1AZ	Basal	5.1501	13.2167	12.5122	7.5611	14.7967	11.2084	2.2482	8.266	9.3391	1.3222	10.8899	10.5961	10.6409	6.5188	10.5549	11.3087	9.2566	6.8173	3.615	9.5166	12.7986	11.7927	10.8137	11.9729	11.3524	2329	0
TCGA.E2.A1B1	LumA	8.3513	12.0177	12.6357	8.5801	14.703	10.7614	3.1004	7.812	9.1438	1.1781	9.6025	10.395	12.0037	6.9819	11.0153	11.2215	7.0155	6.9458	11.8342	9.913	12.2807	12.5994	10.011	11.3291	11.5617	2653	0
TCGA.E2.A1B6	Basal	6.3176	12.174	10.205	7.2977	14.4771	11.4912	4.1484	9.2744	10.8743	2.5073	10.6429	10.4287	10.7423	7.8797	10.5075	9.3199	6.7502	8.0985	11.6029	10.2045	12.2289	12.1038	11.3834	11.2345	10.1543	867	0
TCGA.E2.A1BC	LumA	9.395	10.9567	10.8912	8.4521	14.0956	10.7383	1.3736	6.4547	9.8086	0	8.237	9.9934	10.913	5.782	8.9744	11.3887	7.0731	7.1233	8.3574	9.3761	11.4771	11.6827	9.3376	11.3761	11.1454	501	0
TCGA.E2.A1BD	LumA	8.9357	12.495	10.3248	7.0894	14.2909	10.6335	7.2644	7.3447	11.0645	0.3238	9.9824	10.3322	9.2797	6.7648	8.7916	10.6481	7.3995	8.0674	9.2158	9.3347	11.5444	11.6371	10.7083	11.0509	9.4288	1133	0
TCGA.E2.A1IE	LumA	6.8343	11.7664	9.7579	7.1809	15.006	11.7819	1.319	7.7797	10.6794	0	10.7363	9.9046	8.5606	8.2502	8.7764	10.8188	7.1625	7.3938	4.5031	8.8662	11.5728	11.8898	9.9905	11.4128	11.457	2362	0
TCGA.E2.A1IF	LumA	8.5804	12.5331	10.4089	7.1679	14.5746	10.9566	0.5107	7.3204	11.0413	0.5107	9.4961	10.4494	10.6857	7.0204	8.7192	10.0984	7.0515	7.3988	12.6936	9.4901	11.8485	12.0061	10.6109	10.7925	9.4495	1138	0
TCGA.E2.A1II	Basal	4.7861	12.2594	12.1114	9.0645	15.3304	11.2477	9.9785	8.334	11.2551	0	10.7101	10.8865	7.9065	6.6515	9.9755	10.3411	8.0259	7.6451	4.9892	10.9963	13.1671	11.3233	11.4556	11.5878	11.7103	1025	0
TCGA.E2.A1IJ	LumA	8.9934	11.8758	11.8893	7.6431	14.3795	10.7317	4.7031	8.5149	10.6969	0	9.0399	10.3446	11.3375	5.8489	9.3206	10.505	7.0305	7.773	10.4883	9.2201	11.706	11.6194	9.7818	10.9031	10.2351	865	0
TCGA.E2.A1IK	LumA	7.7806	12.9036	11.9456	11.9931	15.2493	11.1065	5.4703	7.9425	11.2093	0	8.7385	9.8806	8.7202	6.4251	10.2545	10.3957	6.2373	7.5478	4.3923	9.6705	12.0227	11.4019	10.3595	11.0261	11.0437	1800	0
TCGA.E2.A1IL	LumA	8.6844	12.0051	10.8798	11.7224	14.5656	11.0125	0	6.5275	10.5014	1.2484	9.2655	10.9288	9.8442	5.3325	8.8992	11.2603	6.8458	7.9063	8.1975	9.3582	11.8766	11.1311	9.5904	11.2431	10.1202	118	0
TCGA.E2.A1IN	LumA	8.7687	12.3252	10.9936	6.5004	15.3642	10.7268	2.7489	7.7104	10.3176	0.6276	9.7156	10.3311	9.8114	6.1991	8.4858	11.2255	6.8679	7.9613	7.9661	10.6381	12.1547	11.0284	10.5156	11.3423	10.143	675	0
TCGA.E2.A1IU	LumA	7.7577	12.0704	10.5819	7.2365	14.6038	11.0506	1.7935	7.7356	10.0945	0	9.788	10.1388	9.5723	6.0803	9.4322	11.4604	7.1756	7.7244	12.0661	9.4728	12.0665	11.6569	9.9021	10.9844	10.5675	337	0
TCGA.E2.A1L6	LumA	8.8309	12.2675	11.0361	7.7432	14.1007	11.0777	3.6111	7.6848	10.581	0.3913	9.2092	10.0528	10.8175	6.1065	9.4955	11.2275	6.9481	6.8924	8.8299	9.7328	11.9283	11.0698	10.0667	10.9922	10.2679	1648	0
TCGA.E2.A1L8	LumA	8.7607	11.4058	10.0759	8.8104	13.9963	10.0067	7.3899	7.3899	9.9104	1.6008	9.1217	9.7786	9.881	5.7887	8.9594	10.9784	7.7333	7.1835	7.0897	10.6227	12.2942	11.4241	9.9774	11.4656	10.8941	2240	0
TCGA.E2.A1LA	LumA	8.7027	11.7219	9.7148	5.6036	15.1745	10.1995	2.041	8.788	10.9209	2.041	9.9945	10.0889	8.9107	8.7893	9.3479	9.5283	6.1197	7.7184	6.4037	9.8286	11.7633	11.6562	10.1742	11.2835	10.0288	748	0
TCGA.E2.A1LG	Basal	5.9569	12.082	11.2524	10.1149	14.3337	11.2913	0.9422	5.7584	9.0603	1.6553	11.3721	10.9417	9.352	6.3753	10.3489	10.9437	6.6611	8.1318	12.1442	10.5312	13.5177	11.7511	10.7986	12.3395	9.6099	1523	0
TCGA.E2.A1LI	Basal	7.028	12.4595	12.1247	4.8663	16.3507	10.8403	5.4184	8.5809	10.6086	1.4869	11.4145	11.4295	9.3058	7.5012	11.4005	10.1607	7.0379	7.152	9.421	10.6111	12.2966	11.0886	10.7156	12.0771	10.7836	3121	0
TCGA.E2.A2P6	LumA	8.7916	11.6301	8.9481	8.4699	13.8796	11.6499	0	9.1385	10.9851	0	9.974	10.5018	9.4883	7.3429	9.1313	10.0403	7.6628	7.8297	12.2595	8.6353	11.5029	11.1615	9.977	10.6774	10.6863	1051	0
TCGA.E2.A3DX	LumA	8.2103	12.3388	12.5444	8.3465	14.1189	11.0452	0.9727	8.307	10.9232	1.1912	9.0709	10.3164	11.7023	5.2351	9.2511	10.4278	7.0577	7.2307	8.414	9.2	11.6144	11.0324	9.3366	10.6925	10.0517	1325	0
TCGA.E2.A56Z	LumB	6.6976	11.6642	9.1096	5.6894	15.1387	11.1182	8.8111	8.7261	11.3048	0.5369	9.7742	10.2264	8.1082	8.1306	9.4848	10.2834	7.0902	8.0873	11.2078	10.1801	12.5508	11.2768	10.6782	11.1614	10.8676	252	0
TCGA.E2.A570	LumA	9.1268	11.4741	10.8605	6.0241	14.4222	10.6994	2.5399	7.41	11.0384	1.6509	9.318	10.0771	10.6756	7.3448	8.5913	10.1235	7.1523	7.9708	4.8757	9.8289	12.1251	10.9997	10.7955	10.7415	9.8204	931	0
TCGA.E2.A572	NA	8.8418	12.3393	5.7808	6.0163	15.4604	10.3432	2.459	8.7759	12.5533	0	9.1543	9.6568	6.7296	7.0218	9.0723	9.0803	6.5994	8.4465	7.5994	8.9018	12.2319	12.4883	10.8473	11.0197	8.7426	1208	0
TCGA.E2.A573	Basal	6.3038	12.9775	11.1366	7.5177	15.4711	10.9078	3.4341	9.8348	11.3196	2.2439	11.519	10.8844	9.719	8.0061	12.8016	8.5638	7.2243	7.1408	11.0381	10.0188	12.3593	11.8684	11.2245	11.4018	10.7752	1062	0
TCGA.E2.A9RU	NA	7.4051	12.5982	10.1944	3.7068	15.0807	11.2515	1.5955	8.3421	12.6079	0	10.9123	10.1168	8.9486	8.1382	9.5122	9.3141	6.8611	8.0138	8.4737	9.1407	12.8637	11.1657	11.3709	11.0202	9.4059	538	0
TCGA.E9.A1N5	LumA	7.5495	11.9328	11.6339	6.2098	14.7798	11.5148	3.7883	8.3847	10.7768	0	10.3852	10.3343	11.1536	6.1186	9.1444	10.823	7.1294	7.5683	5.8502	9.2107	11.9893	11.3952	9.5822	10.7908	10.2504	1120	0
TCGA.E9.A1NE	LumA	6.8151	12.3145	11.2426	8.5434	14.8463	11.2899	1.7668	8.4794	10.2716	2.0717	9.9017	10.3738	11.642	6.5307	10.4159	11.0606	7.1922	6.9828	4.3188	9.5628	11.8747	12.1754	9.2104	11.5281	10.9684	1088	0
TCGA.E9.A1NG	LumA	7.3621	12.2149	12.8467	6.7275	14.8175	10.7909	0.6862	8.4077	9.9681	0.6862	9.4862	10.386	11.6946	5.9873	10.0206	11.0029	6.7533	7.327	11.1395	9.4776	11.8043	11.3327	10.2997	11.1263	10.5955	786	1
TCGA.E9.A1R3	LumA	8.7989	12.2006	11.9537	8.2632	14.9202	10.5556	3.1725	7.9629	9.8515	0.8086	8.1386	10.2508	10.4204	5.3054	9.1302	11.0349	6.9247	7.6431	11.4527	9.827	12.0221	11.1798	9.6322	11.1531	11.2876	78	0
TCGA.E9.A1R4	LumB	7.8474	11.7913	9.9158	5.447	15.0575	11.5787	2.9553	8.5628	10.4791	0	9.9579	10.7292	10.0656	7.0945	10.1	11.6625	5.3484	7.2853	9.6456	9.7592	11.5463	11.9036	9.2737	10.6048	11.9902	186	0
TCGA.E9.A1RA	NA	8.4795	11.9138	11.8291	5.6148	14.6885	11.1126	0.5566	8.0556	11.1421	0	9.8455	9.9112	9.8507	6.1036	9.2068	11.3614	7.4949	7.9359	8.4833	10.2587	13.1519	11.3905	10.7689	11.1647	10.528	1369	0
TCGA.E9.A1RD	LumA	9.1816	12.1068	10.2113	8.7897	14.8595	10.744	7.1653	7.7709	10.1658	0.3303	9.1873	10.1723	8.9995	6.1822	9.7719	11.7062	7.381	7.3472	6.5127	10.0265	12.2945	11.13	10.2542	11.242	10.4719	34	0
TCGA.E9.A1RF	LumA	7.3347	12.4159	10.6711	6.3285	15.1445	11.4457	0	8.7609	10.7297	1.8994	11.1818	9.6959	10.2807	5.6139	9.4576	10.467	7.0188	7.409	7.6874	8.952	12.5897	13.3385	11.2939	12.4973	10.8136	200	0
TCGA.E9.A1RI	LumA	8.7724	12.1132	11.6705	6.5025	14.8106	10.6434	4.5148	7.495	9.8662	0.7163	8.9252	10.2421	11.9082	6.7374	10.1879	11.2586	7.0671	7.1248	5.3528	9.6667	11.7556	11.7464	10.1755	11.3017	11.2643	1449	0
TCGA.E9.A228	LumB	6.7802	11.7018	11.4992	3.2704	15.1692	13.1046	8.9483	8.7061	10.6121	1.2872	11.0454	10.0788	8.9455	8.2451	8.819	11.3492	6.7496	7.4585	11.552	9.5371	12.6113	12.1701	10.1412	11.4054	11.4547	1285	0
TCGA.E9.A22B	LumA	6.9869	12.4893	11.2596	7.3724	15.6658	10.0852	8.3746	8.3194	11.1604	0	9.1974	10.0099	10.0829	7.0091	10.0522	10.8868	5.8265	7.5969	9.4607	9.8647	12.217	11.917	10.6584	11.9846	10.9923	1167	0
TCGA.E9.A22D	LumB	9.8395	12.4032	9.8411	7.0378	15.4563	11.5499	2.9454	8.3593	10.6393	0.8265	10.3472	10.268	9.3197	7.6432	10.8168	10.2907	6.2786	7.4407	11.3288	9.7016	12.9021	12.1205	10.6001	10.3819	11.3832	1248	0
TCGA.E9.A22E	LumB	7.4825	12.4556	11.9128	7.1939	14.6	10.7751	0	7.7442	10.4166	0.8064	8.9757	10.1294	11.7293	6.3468	9.9748	10.2685	6.0145	7.5503	10.6076	9.8701	12.0771	11.1841	10.6923	11.1416	10.5825	1269	0
TCGA.E9.A22G	Basal	6.8969	13.9061	12.2071	5.9477	15.5507	10.0446	6.3439	7.1132	10.8795	2.4205	11.4856	10.3884	9.2155	7.1176	10.5939	9.4899	7.4082	7.6751	6.8779	11.1619	13.1345	12.256	11.362	11.6583	12.3895	1239	0
TCGA.E9.A243	Basal	6.4017	12.244	12.1352	7.1291	14.5197	10.3033	1.6325	8.8478	9.6249	4.0152	10.8123	10.0011	11.3745	5.7985	11.2801	10.7281	6.9881	7.0613	11.981	10.0132	12.4025	11.3936	10.5319	11.9497	11.3031	612	0
TCGA.E9.A247	LumA	6.9694	11.8405	11.4685	4.9996	15.1356	11.1852	4.7183	8.0787	10.8081	1.2862	10.275	10.3175	8.413	8.3146	10.4807	9.8484	7.393	6.9595	2.983	10.095	11.6315	11.2522	12.0744	11.204	10.4842	1186	0
TCGA.E9.A249	LumB	8.7145	11.8099	11.43	4.7122	14.6453	10.5841	1.6368	6.7838	10.7773	0	10.0356	10.1455	8.6167	6.6765	9.3088	11.6035	7.5705	7.751	4.431	10.5128	12.2281	11.9447	10.8116	11.2668	9.5543	217	0
TCGA.E9.A24A	LumA	8.5817	11.9867	11.0945	5.9037	14.214	10.7089	1.4852	8.3493	9.5961	0.678	8.9186	9.8758	10.1967	5.3949	10.7676	11.015	7.0647	7.1218	12.5752	9.7462	11.5499	10.733	9.3955	11.0376	11.0491	747	0
TCGA.E9.A2JS	LumB	7.6281	11.6613	10.2566	5.4391	15.2913	11.9322	7.2992	8.8176	11.1046	4.1611	10.2129	9.3089	9.3378	8.2304	9.4934	11.0409	6.5344	7.48	7.228	9.5415	12.7054	12.3401	10.1699	10.8525	11.6157	904	1
TCGA.E9.A3X8	LumA	9.0253	12.4718	8.2802	7.0874	14.0387	10.7175	0.9837	9.0361	12.6025	0	9.2176	9.7568	10.3902	7.8591	8.3618	9.0414	6.709	8.4308	6.4433	9.3553	12.0568	11.5588	11.3444	10.833	8.6503	926	0
TCGA.E9.A54X	LumB	7.9843	13.0698	10.4453	4.654	14.9037	11.3167	9.2067	7.4657	11.1017	0.5816	9.28	10.8464	3.3687	7.393	8.8878	11.2473	6.4819	8.4308	6.8727	9.7297	11.9312	11.5123	10.9452	10.9065	10.0005	727	0
TCGA.E9.A54Y	NA	9.1853	12.0823	6.2857	3.0611	15.1532	11.8161	5.7945	8.9183	12.4371	0.6712	10.3712	10.4006	4.15	10.2131	8.1386	9.0255	7.255	9.3009	11.494	9.3966	10.8472	12.0934	10.2296	11.0255	9.8801	725	0
TCGA.E9.A5FK	NA	8.0771	12.6375	9.2073	7.0626	14.7242	10.9421	4.6233	8.3638	12.1046	2.0541	8.6789	10.4243	9.3355	6.8953	10.2284	9.6367	6.1368	8.1536	6.6023	9.1801	12.1757	11.5037	10.8522	10.4779	9.8998	812	0
TCGA.EW.A1IW	LumA	7.6177	11.4754	11.7703	7.9225	14.385	10.5915	3.9271	7.8728	10.5693	0.6291	11.266	10.1054	10.5732	7.2982	9.7148	11.0598	6.8923	7.3637	10.4585	9.5975	12.6434	11.3501	10.0439	11.5825	11.3792	371	0
TCGA.EW.A1IX	LumA	9.0017	11.9007	11.0935	6.5877	14.0875	11.4186	5.5478	7.8333	10.8505	1.9745	9.4132	10.3068	10.8574	5.5276	8.4223	10.8972	7.1534	7.6664	3.6689	9.1944	11.7304	11.3204	9.4155	10.8288	10.2147	1208	0
TCGA.EW.A1J3	LumA	8.514	12.2174	10.1626	6.9484	14.6161	10.6023	6.1272	6.5594	9.5848	0.7389	9.8144	9.9327	8.79	5.894	9.8691	10.9257	7.562	6.2778	9.3064	9.9798	11.9975	10.6104	10.3436	11.2711	10.687	504	0
TCGA.EW.A1J6	LumB	8.7462	11.9508	8.1682	9.0391	15.3106	11.5045	7.2762	10.0664	10.0349	2.4706	9.4355	10.5079	7.1159	8.6963	11.9908	11.2071	8.1383	7.0226	5.8863	9.9572	12.0257	10.2933	11.0681	11.8621	11.1709	875	0
TCGA.EW.A1OW	Basal	6.4572	12.5923	12.8409	8.4403	15.5768	10.6413	2.1241	6.9525	9.99	2.1241	11.6254	11.096	10.7209	7.6619	10.5436	9.6	7.222	7.4608	7.8836	11.2085	12.2477	11.5204	11.1472	11.4984	11.1536	694	0
TCGA.EW.A1OX	LumB	7.7173	12.511	8.6234	2.6048	15.1965	12.5755	7.0596	7.7802	10.887	1.4345	10.0518	10.124	5.5903	6.3961	9.4389	11.0088	6.7898	7.1575	8.0748	8.9483	11.9755	12.1755	9.7419	11.1718	10.7691	911	0
TCGA.EW.A1OY	LumB	8.1403	12.5918	9.5887	6.3239	15.2734	10.5907	8.2074	7.772	11.0568	0.601	10.5188	9.5653	8.3586	6.8365	9.7738	9.3863	6.4565	7.4945	8.7721	10.1009	12.9588	12.3624	10.4565	11.3602	10.4686	908	0
TCGA.EW.A1P0	LumB	8.2666	11.9163	9.5051	5.0482	15.2629	11.4576	1.2268	6.7875	10.7384	0	9.8714	10.1955	9.719	5.6568	9.1212	10.0912	6.7699	7.2817	8.5282	9.7672	11.965	11.3607	9.6606	11.2975	11.3161	1251	0
TCGA.EW.A1P1	NA	7.4039	12.1541	12.1648	9.6585	14.8767	10.6601	1.5986	7.0917	10.6114	0	9.1379	10.319	11.5063	5.6885	10.5873	10.1977	6.5279	7.5555	9.7371	9.9767	12.2662	11.1499	10.0978	10.9174	10.8449	1210	0
TCGA.EW.A1P4	Basal	7.1444	12.6997	12.9526	5.7399	15.8084	10.9717	1.5352	7.8186	10.8535	3.2827	11.7177	10.7622	10.2781	6.7367	11.7605	10.2437	6.6231	8.1814	12.6009	10.7367	13.2915	11.2519	10.6212	11.2257	11.3521	907	0
TCGA.EW.A1P5	LumA	7.837	12.3767	10.1745	6.6009	15.4615	10.9012	8.955	9.077	11.0054	0	9.8305	10.2728	8.4536	7.0507	10.7478	12.1537	6.821	8.2535	3.6783	9.6739	12.2709	11.1895	10.5828	11.1528	11.5411	703	0
TCGA.EW.A1P6	LumA	9.4847	12.2106	10.8215	4.9853	15.6432	10.5746	3.3958	7.7144	10.5751	0	10.3249	10.8337	10.3586	6.8995	7.6398	11.1689	6.9515	8.2287	7.5652	9.7691	11.95	11.4399	10.0301	11.1299	10.46	562	0
TCGA.EW.A1P7	NA	6.6665	11.8261	13.2017	10.4275	14.2563	11.4861	3.6059	9.1985	11.0831	1.1646	10.2898	10.6109	11.1069	5.6988	10.036	10.0758	7.2768	7.4635	8.7095	9.5896	11.5364	10.9027	9.5638	10.866	10.7482	915	0
TCGA.EW.A1PA	LumA	7.8042	12.3165	11.2156	7.3586	13.9737	11.7208	3.6458	8.5115	10.638	1.5073	10.4089	9.641	9.8931	7.1068	9.1523	9.803	7.4177	7.5932	3.9336	9.6082	11.3525	11.1609	10.2987	11.0417	10.4118	575	0
TCGA.EW.A1PB	Basal	4.9697	11.7631	10.862	6.6857	14.762	11.3002	3.1808	9.6258	12.6512	1.386	11.0785	10.3006	7.0824	6.9061	11.4733	10.1027	7.0306	8.3212	7.2142	10.362	13.1062	11.1052	11.2003	11.0414	10.6653	608	0
TCGA.EW.A1PC	LumB	7.7196	13.3212	9.6254	4.5942	14.8731	10.9513	7.2139	8.3098	10.581	0.3047	12.4899	10.2454	9.1421	8.3294	12.2944	10.5413	7.6351	7.6571	9.5124	9.5128	13.5206	11.9677	10.2051	12.4116	11.5818	187	0
TCGA.EW.A1PF	LumA	7.4226	11.7226	11.8712	7.0621	15.4813	10.935	0.4434	8.4169	10.721	5.6524	9.8829	10.2584	10.6792	5.9249	9.0389	11.0641	6.638	7.5909	9.2801	8.5599	12.3825	11.2618	9.8495	11.2503	10.6821	439	0
TCGA.EW.A1PH	Basal	6.9312	12.9034	11.9175	8.089	16.0431	10.8715	4.0435	7.1664	10.2403	1.6606	10.4289	11.3003	11.9942	6.4881	12.4147	9.7241	6.6908	6.65	10.9761	10.6811	12.3859	11.6428	10.9291	11.4926	11.0753	607	0
TCGA.EW.A2FS	LumA	8.1791	12.5563	9.5649	7.1628	14.8924	12.1153	5.0395	8.2317	10.692	4.539	9.5102	10.4765	9.6362	8.3864	10.6013	9.915	7.0472	7.1896	13.1717	9.2487	11.5775	11.4813	10.6603	11.0514	10.3226	1604	0
TCGA.EW.A423	LumA	8.0724	12.2612	8.1907	5.5307	14.7835	12.4113	2.9209	8.5907	11.2382	2.0998	9.5646	11.084	7.1715	7.1205	8.6801	10.427	7.7892	7.9339	9.974	9.1046	12.0303	11.4984	11.1009	10.7928	9.509	533	0
TCGA.EW.A424	LumA	7.4969	11.7908	11.0195	7.0483	15.16	11.3126	7.1947	7.8777	11.4586	0.712	9.8696	10.5708	9.9134	7.1879	8.8368	10.5215	7.6809	7.3857	6.9597	9.9634	11.8478	11.3119	10.2327	10.988	9.7619	715	0
TCGA.EW.A6S9	NA	8.512	12.2461	12.5251	4.8924	15.3058	11.7309	3.4006	7.3768	10.4648	0.4672	10.4236	10.2991	10.2785	6.3886	9.7188	10.9673	7.0223	7.7696	7.4916	9.4709	12.742	11.239	10.0988	11.1977	11.2588	463	0
TCGA.EW.A6SA	NA	7.4134	12.2275	8.8486	3.0532	15.3596	11.6952	0	7.0374	11.4605	2.1422	11.2138	10.5548	6.6524	8.156	8.887	10.9091	7.0272	6.8638	5.0833	10.1803	12.3386	12.4734	9.8121	10.8244	10.5085	510	0
TCGA.EW.A6SB	NA	6.9951	12.714	11.5626	7.92	15.272	10.7155	4.2608	8.4641	11.53	1.5259	10.4833	11.3265	7.5613	7.2358	9.5718	8.4434	7.1238	8.1698	7.9498	11.0306	13.0272	11.4872	11.2951	11.1591	10.4699	760	0
TCGA.EW.A6SC	NA	7.1027	11.9269	10.9559	6.7974	15.065	11.2122	1.1759	7.6347	10.9238	0.8794	10.2344	10.5207	9.7654	6.4421	9.7712	10.6382	5.9414	7.0982	6.3872	9.7268	12.2245	10.9747	9.8677	10.9244	10.5124	952	0
TCGA.GI.A2C8	LumA	7.4949	12.2075	10.9546	6.9736	14.6343	11.6607	1.4187	8.5794	10.4027	1.0029	8.4515	10.1329	10.2266	5.2677	10.0642	10.9578	6.5654	7.4348	5.0931	9.5838	12.1377	11.8513	10.5086	10.8429	10.9434	225	0
TCGA.GM.A2DA	LumA	8.2579	12.0718	10.0973	7.5717	13.9897	11.2924	0	7.2677	10.6471	1.0606	9.3401	10.4121	10.3402	6.3004	10.0611	10.0104	7.7255	6.7175	9.9436	9.5087	11.5045	10.7036	10.5822	10.7751	10.021	6593	1
TCGA.GM.A2DB	Her2	9.4196	12.9362	11.6144	5.613	15.5372	11.3242	3.3145	8.1326	11.8206	0.8038	10.1741	9.5729	8.3411	7.5584	9.4856	10.3319	6.4843	8.2503	9.8979	10.0558	12.9499	11.3376	11.5433	11.7579	11.4629	2406	0
TCGA.GM.A2DH	Her2	6.5719	12.3412	9.3871	6.3015	14.8436	11.4871	7.934	7.8807	10.4188	2.8068	12.1113	10.8081	9.4791	8.0965	10.7999	10.0948	7.1267	6.2299	3.4474	10.1224	12.9593	11.6048	10.2659	11.6731	11.8936	2193	0
TCGA.GM.A2DI	LumA	8.0512	12.1484	11.0646	8.5659	14.2561	11.1103	5.5265	8.1944	10.749	1.3687	9.661	10.4354	11.3382	5.1133	9.9876	10.6236	6.2806	7.6351	8.9317	9.375	12.1637	10.7263	9.2864	10.6301	10.4204	2590	0
TCGA.GM.A3NY	LumA	8.4867	12.2924	10.195	8.2461	13.3183	11.5439	7.3929	7.3959	10.7769	1.6228	8.7532	10.6884	8.9775	8.0501	9.1587	10.1179	8.1097	8.1906	12.1781	9.6948	11.0289	10.8637	10.7834	10.7373	9.2722	1162	0
TCGA.GM.A3XL	Basal	4.825	11.9715	10.7021	4.9601	15.7664	11.416	1.0274	8.7856	12.1857	1.7753	12.0919	9.5831	7.1621	8.8314	11.1432	9.8258	6.9348	8.3319	9.1114	10.628	12.95	12.4394	11.1642	11.5143	10.96	2108	0
TCGA.GM.A3XN	LumA	7.7834	12.1709	11.094	8.2468	14.1435	11.681	9.2246	8.1915	11.2044	0	9.1838	10.6141	10.4952	6.1183	9.6216	10.6982	7.036	7.8358	6.5596	9.3909	11.9605	11.4007	10.3504	10.5112	9.8523	2019	0
TCGA.GM.A4E0	LumA	7.0808	11.819	10.3451	10.0601	13.8689	11.3531	5.6067	9.2381	11.0972	2.2239	8.1815	10.6402	10.4899	6.4488	9.9482	9.4005	6.9499	7.6171	9.1116	9.3989	11.2906	11.2248	10.0616	10.7	9.9168	2191	0
TCGA.GM.A5PX	NA	7.8232	12.0016	9.9399	8.156	14.072	10.6763	4.1221	7.1973	10.9977	0.4759	8.8533	10.1255	9.9126	5.9356	9.1802	9.9907	7.0562	7.9102	7.8232	9.2337	11.6773	10.9195	10.5065	10.744	9.8172	551	0
TCGA.HN.A2NL	NA	5.8294	12.7212	12.3147	8.7194	15.4733	11.4946	8.951	7.2758	12.0581	0.4229	12.1113	10.5671	8.8574	7.9085	11.0476	9.8359	8.3149	7.694	1.2403	11.7341	13.5203	12.3524	10.5985	11.2108	11.8167	79	0
TCGA.LD.A74U	NA	7.784	12.2774	11.1639	8.8261	14.3447	11.463	2.5614	8.4809	11.2193	1.1543	9.7798	10.4019	11.1744	6.087	9.4505	10.2702	7.9173	7.9095	11.0586	8.8966	12.189	10.9073	10.0161	10.8127	10.452	402	0
TCGA.LD.A7W5	NA	5.7778	12.1556	9.9326	7.0886	15.0192	11.9687	4.4699	7.9118	11.5282	1.3802	10.0123	11.2728	10.418	6.1505	9.6944	9.9672	7.4091	8.192	7.4911	8.8123	11.8245	13.8835	9.7983	10.9733	10.0384	216	0
TCGA.LD.A9QF	NA	7.1983	12.0751	12.21	7.744	14.3523	11.2515	5.9471	9.272	11.4231	1.5646	9.2811	10.4806	10.2814	5.6965	10.0792	9.9373	6.8276	7.6595	12.2964	8.8672	12.6544	11.4453	10.0876	10.8017	10.4138	323	0
TCGA.LL.A441	NA	4.6759	12.1924	10.8452	8.2754	15.4657	10.888	4.0103	9.1095	11.1587	1.68	10.3532	10.7908	10.1658	7.0146	10.1119	9.651	7.9069	7.3832	3.0972	9.9375	12.1844	11.0218	10.2263	10.6604	10.4031	996	0
TCGA.LL.A442	LumA	8.86	12.5462	9.382	4.5323	15.2114	11.8908	2.6903	8.7641	10.9031	3.2974	10.6394	10.3303	1.6449	6.7715	8.5488	11.2626	7.506	7.6806	10.0978	9.4506	11.4114	10.7466	9.4104	10.9754	10.8882	889	0
TCGA.LL.A5YL	LumA	9.1014	11.9586	10.2153	7.2094	14.237	10.8246	2.6412	8.6811	11.8571	0	9.1795	10.1127	8.9332	7.2081	9.0736	9.5626	6.5409	8.1777	12.8465	9.5323	12.4294	11.768	10.2009	10.0114	9.4474	519	0
TCGA.LL.A73Y	NA	5.3699	12.0201	13.321	11.4375	15.0642	11.4188	3.5736	8.3309	10.9007	1.2952	9.8804	10.5913	10.7249	6.017	9.6498	10.1137	7.6486	7.7515	12.1324	10.6122	12.505	12.0699	9.6228	10.9909	10.5804	477	0
TCGA.LL.A73Z	NA	7.4437	12.3591	11.2077	8.1256	15.3075	10.9221	2.4832	7.8462	11.2026	1.7206	9.7855	10.2753	10.6869	7.0355	11.3233	9.985	6.6061	8.2459	8.3812	9.7273	12.7497	11.204	10.6173	10.8103	10.6295	227	1
TCGA.LL.A7SZ	NA	8.8397	12.7915	9.8348	4.398	14.9394	10.7354	1.6279	8.5781	12.3169	0	11.2202	9.5657	9.7336	7.5392	8.058	8.5273	6.4612	8.5354	12.1559	9.5019	13.3723	12.1623	10.1096	10.7983	10.7472	594	0
TCGA.LL.A8F5	NA	6.461	13.0831	11.2353	10.592	14.6028	10.7414	1.6316	9.0777	11.6857	2.5165	12.334	9.696	7.6283	7.9853	10.5421	8.9822	6.917	7.9395	9.1647	10.0959	12.9996	11.1472	11.2746	11.3367	9.3478	596	0
TCGA.LQ.A4E4	LumA	7.7842	11.7321	9.2817	6.7099	15.2262	11.1499	0.5837	7.5662	11.1298	0	10.402	10.2191	9.6505	6.0974	8.4922	10.6709	7.7842	8.1075	11.398	8.7793	12.4592	11.2944	10.059	10.8922	10.5911	849	0
TCGA.MS.A51U	NA	8.2005	12.0743	11.558	7.806	13.8547	11.4018	2.6361	7.1692	10.7835	0	8.8489	10.1572	11.1863	5.5905	10.0058	10.3971	7.0663	7.4271	7.0941	9.3184	12.0546	11.3583	9.6432	10.755	9.8636	681	0
TCGA.OL.A5D6	NA	8.4828	12.9326	11.3376	6.2875	15.2365	11.2961	1.018	7.5434	11.5889	1.3435	9.0978	9.3856	10.112	5.4806	8.596	10.3148	6.7769	7.9927	10.8073	8.5749	12.8385	11.8332	10.2855	11.1947	10.7819	1104	1
TCGA.OL.A5D7	NA	6.7554	12.9186	10.5461	5.2734	15.1197	11.8475	3.0299	8.4855	12.7176	2.8504	11.7891	9.9368	8.3166	7.4428	10.2583	8.4759	7.3779	8.6728	4.891	10.8917	12.6388	11.5078	10.9903	11.1702	11.0418	1780	0
TCGA.OL.A5D8	NA	8.1783	12.0577	9.3311	5.0145	14.8282	11.838	9.6675	8.0536	11.2511	0.4994	10.4014	11.0502	8.4613	7.3578	9.3218	10.0818	7.2708	7.6758	5.2563	9.6483	11.4597	12.7857	9.7194	10.827	10.3516	973	0
TCGA.OL.A5DA	NA	7.2055	11.8902	10.4488	6.5055	15.5519	11.388	7.5821	6.6535	11.2458	1.1673	9.6364	11.1361	9.1556	6.7061	8.5594	9.8948	7.056	7.8931	5.0066	9.325	11.2156	10.9635	9.8093	10.8041	9.9327	1783	0
TCGA.OL.A5RW	NA	7.0672	13.121	9.4328	6.3035	15.3239	11.3815	6.7812	8.2473	12.1465	1.3258	11.7641	10.7854	7.2628	8.442	12.4996	9.3859	6.561	7.4327	13.6298	10.1019	13.7136	12.3708	10.4411	11.5108	9.3441	1106	0
TCGA.OL.A5RX	NA	7.6951	12.1361	11.8097	7.4485	14.5449	11.0186	0	6.9685	11.0134	0.4999	9.2373	10.7052	10.3314	5.7061	9.2936	10.5979	7.0609	7.6393	4.4122	9.6096	11.7652	11.6665	10.2302	10.6726	9.5965	878	0
TCGA.OL.A5RZ	NA	7.5124	12.0805	11.0314	4.908	15.7453	12.5602	1.3417	7.0605	11.8836	2.3483	11.1374	11.304	7.3317	6.5618	6.827	9.8466	6.625	8.7993	6.6978	10.0908	12.7617	14.3035	10.7885	11.1879	11.9157	679	0
TCGA.OL.A66I	Basal	6.3272	13.2136	12.7152	7.9136	15.4186	11.0772	7.3881	8.9467	11.4536	0.8755	11.302	10.448	9.3566	7.5463	9.905	9.003	6.713	7.5414	8.4386	9.6404	12.3857	11.212	10.3765	10.723	10.84	714	0
TCGA.OL.A66J	LumA	4.7622	11.107	9.7639	8.5021	14.4372	11.1903	8.5596	8.3141	11.2662	0.5367	9.4815	10.0981	9.8136	7.4814	9.4705	8.9693	6.7156	8.0503	6.8171	9.4116	11.8354	10.7931	10.1766	10.7392	9.7795	1996	0
TCGA.OL.A66L	NA	9.1474	12.4662	7.7301	6.9289	14.344	11.2295	4.5435	7.239	12.3445	1.2778	9.1045	10.3062	9.4123	6.9772	9.1328	9.556	6.2929	8.2297	7.0709	9.163	12.5763	11.3969	11.0745	10.5628	8.7713	1301	0
TCGA.OL.A66N	NA	6.8469	12.0153	9.6963	6.887	15.0819	11.2766	6.9891	9.0401	11.7695	0	9.5847	10.0682	9.2705	7.0765	8.1613	9.8744	7.0226	8.4109	9.8486	8.9298	12.6926	11.7627	10.7841	10.41	8.9781	792	0
TCGA.OL.A66O	NA	9.0417	12.2387	7.4108	4.0304	15.2273	13.0961	0.7874	8.5712	12.2181	0.7874	10.9619	9.9415	8.0284	8.6845	9.0156	9.5442	7.1519	7.9722	7.3702	9.6247	12.7803	11.8278	10.3792	10.9378	9.828	528	0
TCGA.OL.A66P	NA	7.6038	13.2196	8.933	6.4043	14.6145	11.2032	2.5936	8.9851	12.318	1.6591	9.7312	9.8234	8.9034	5.2204	9.1237	8.728	6.1007	8.0848	7.7652	9.6752	12.9826	12.7535	9.9069	10.6165	10.7168	428	0
TCGA.OL.A6VO	NA	6.0908	13.0255	11.4623	5.3457	15.7421	11.1272	2.2308	7.3325	10.7546	1.2285	11.0625	10.2506	8.7449	8.7872	11.4463	10.5041	6.835	8.3681	7.3234	11.6175	11.9474	11.4618	10.8056	10.6879	10.9097	858	0
TCGA.OL.A6VQ	NA	8.8726	12.1554	11.8455	8.5002	14.1326	11.3241	1.0073	7.4154	10.7271	1.0073	9.3961	10.5701	10.8867	5.5835	9.472	10.6108	6.1437	6.9214	7.0913	8.7828	11.7586	10.9789	9.5787	10.75	10.048	600	0
TCGA.OL.A6VR	NA	8.6683	12.4438	9.5449	6.0925	15.0414	11.1286	5.8246	7.0053	11.251	0.6857	10.0074	10.341	8.2046	6.9054	9.1993	10.4485	6.9954	7.9615	5.0814	9.2142	12.2291	11.7111	9.7692	10.6015	10.021	1220	0
TCGA.PL.A8LV	NA	7.7934	12.8528	11.761	6.026	14.7753	10.5563	2.6976	9.0274	11.1516	1.7164	11.2866	9.7622	9.7235	7.9951	9.8782	9.2365	6.5728	7.4492	12.6694	9.6818	13.128	11.2278	10.9952	10.9111	10.4185	NA	NA
TCGA.PL.A8LX	NA	8.4565	12.112	8.9053	5.5235	16.1922	12.8934	0	9.2534	10.686	1.4752	9.715	10.494	6.341	6.4618	9.4708	10.4896	7.4907	8.8864	10.452	9.3589	12.0274	11.6554	10.3116	11.1707	11.4607	NA	NA
TCGA.PL.A8LY	NA	7.2118	12.6051	12.0012	8.9739	15.1434	10.9163	0.6298	7.2946	11.5922	1.0667	10.2565	10.6387	9.2107	6.8377	9.0888	10.2871	7.2276	8.4722	4.1673	9.9633	12.6767	12.4357	10.2871	10.9597	9.6744	NA	NA
TCGA.S3.A6ZH	NA	9.9484	12.1281	9.4619	5.1372	15.2673	10.5134	1.5309	7.282	10.7198	0.395	11.572	10.2532	8.5641	8.812	9.2402	10.7351	6.9812	8.0182	10.1625	9.2235	13.001	11.7433	10.3237	11.243	11.1987	641	0
TCGA.S3.AA0Z	NA	4.8961	13.0936	11.6106	5.1563	14.7428	12.0841	3.0937	7.2903	10.6446	4.1802	12.6174	11.2927	8.6969	7.2087	10.6794	10.3314	7.6735	7.8911	12.2039	9.4317	11.9222	11.5928	8.8032	11.5603	11.9002	629	0
TCGA.S3.AA10	NA	6.4346	12.6866	12.8216	8.0466	15.4164	10.8929	2.6098	8.5601	11.4821	1.9919	11.8689	9.7831	9.6686	8.4053	11.1419	9.3082	7.256	7.7248	11.2051	10.0237	12.9399	11.3106	9.5647	10.4346	10.8842	586	0
TCGA.S3.AA11	NA	7.4885	11.8805	10.2772	5.4002	14.3569	11.9679	6.6576	7.7931	11.0646	2.3214	8.4683	10.56	8.5194	7.0898	9.3611	10.7126	7.9308	7.7902	3.3687	9.3601	11.9813	11.2581	9.8373	10.9239	10.719	421	0
TCGA.S3.AA12	NA	8.5331	11.7288	10.2865	6.8881	15.0395	11.7521	2.2986	5.866	11.2109	0.9854	10.2486	10.5036	6.7967	7.6432	8.7089	10.7427	7.2655	7.2793	5.0591	10.0773	12.151	10.7921	9.3095	10.9512	10.7973	574	0
TCGA.S3.AA14	NA	9.7384	12.6172	11.6795	6.6008	14.3871	11.3734	0	7.1485	10.9762	0	9.9949	10.1639	11.0218	6.4375	8.8847	10.6901	7.2641	7.8083	5.7691	9.1495	12.4834	11.4225	9.6225	11.2974	10.4179	529	0
TCGA.W8.A86G	NA	8.3365	11.8998	10.9503	10.7796	14.289	11.627	2.3982	7.3431	11.2605	1.2773	8.4109	10.8102	11.3363	6.3625	9.2748	10.3385	7.9447	7.3929	6.1157	9.373	11.4159	11.0496	10.1609	10.4528	9.5742	347	0
TCGA.WT.AB41	NA	6.9453	11.9929	7.9624	5.4822	14.4032	11.967	5.8126	9.0265	11.2453	2.3054	9.3161	10.7291	8.1842	8.5146	9.9304	8.3897	6.7792	7.9395	7.2593	9.6437	11.7984	12.0004	10.7054	10.219	9.3018	1611	0
TCGA.XX.A899	NA	7.791	11.8563	11.7421	8.7212	14.5212	11.2137	7.1168	8.3823	10.8985	1.5697	9.8843	10.476	11.7407	6.311	10.2086	10.5001	7.333	7.5486	5.7377	9.4172	11.8523	11.2301	9.6293	10.8512	10.4728	467	0
TCGA.XX.A89A	NA	7.0784	11.8715	11.1528	8.6613	14.7144	11.1748	6.7325	8.3797	10.6438	1.5308	9.9032	10.9141	11.085	6.3041	9.1672	10.3109	7.276	7.6429	9.6621	9.0345	12.337	10.5953	9.803	10.5691	10.8113	488	0
TCGA.Z7.A8R5	NA	8.1565	12.1532	10.5102	9.5422	14.8507	10.7204	3.4001	8.5912	11.6653	1.4813	8.7438	10.5481	10.9148	7.0381	9.766	9.5017	7.0846	8.1474	9.6656	9.479	12.4029	11.7628	10.7286	10.4579	9.91	3287	0
TCGA.Z7.A8R6	NA	9.0459	12.104	9.2979	5.1631	14.7037	10.4833	2.9282	7.3501	11.1308	0.4308	11.3358	10.3711	8.9621	8.1176	9.1244	10.382	6.936	7.6935	9.6043	9.8656	12.8911	11.6848	10.1064	10.7572	10.5135	3256	0

## Sheet: GSE10780 26 genes
Probe Set ID	Gene Symbol	GENE
229534_at	ACOT4	ACOT4
208674_x_at	DDOST	DDOST_1
208675_s_at	DDOST	DDOST_2
201579_at	FAT1	FAT1
204421_s_at	FGF2	FGF2_1
204422_s_at	FGF2	FGF2_2
1557910_at	HSP90AB1	HSP90AB1_1
200064_at	HSP90AB1	HSP90AB1_2
214359_s_at	HSP90AB1	HSP90AB1_3
211868_x_at	IGHA1	IGHA1_1
211637_x_at	IGHA1	IGHA1_2
211639_x_at	IGHA1	IGHA1_3
211635_x_at	IGHA1	IGHA1_4
217236_x_at	IGHA1	IGHA1_5
211641_x_at	IGHA1	IGHA1_6
211638_at	IGHA1	IGHA1_7
217281_x_at	IGHA1	IGHA1_8
214916_x_at	IGHA1	IGHA1_9
211636_at	IGHA1	IGHA1_10
217217_at	IGHA1	IGHA1_11
217022_s_at	IGHA1	IGHA1_12
211646_at	IGHA1	IGHA1_13
234419_x_at	IGHA1	IGHA1_14
211649_x_at	IGHA1	IGHA1_15
216558_x_at	IGHA1	IGHA1_16
211650_x_at	IGHA1	IGHA1_17
216557_x_at	IGHA1	IGHA1_18
217360_x_at	IGHA1	IGHA1_19
217169_at	IGHA1	IGHA1_20
216510_x_at	IGHA1	IGHA1_21
217084_at	IGHA1	IGHA1_22
216542_x_at	IGHA1	IGHA1_23
1561937_x_at	IGHA1	IGHA1_24
234477_at	IGHA1	IGHA1_25
234792_x_at	IGHA1	IGHA1_26
201598_s_at	INPPL1	INPPL1
206502_s_at	INSM1	INSM1
205468_s_at	IRF5	IRF5_1
205469_s_at	IRF5	IRF5_2
239412_at	IRF5	IRF5_3
202424_at	MAP2K2	MAP2K2_1
213487_at	MAP2K2	MAP2K2_2
213490_s_at	MAP2K2	MAP2K2_3
1555313_a_at	MCF2	MCF2_1
208017_s_at	MCF2	MCF2_2
214884_at	MCF2	MCF2_3
217004_s_at	MCF2	MCF2_4
202107_s_at	MCM2	MCM2
202875_s_at	PBX2	PBX2_1
202876_s_at	PBX2	PBX2_2
211096_at	PBX2	PBX2_3
211097_s_at	PBX2	PBX2_4
1554828_at	PDGFRA	PDGFRA_1
203131_at	PDGFRA	PDGFRA_2
211533_at	PDGFRA	PDGFRA_3
215305_at	PDGFRA	PDGFRA_4
202430_s_at	PLSCR1	PLSCR1_1
202446_s_at	PLSCR1	PLSCR1_2
244315_at	PLSCR1	PLSCR1_3
201267_s_at	PSMC3	PSMC3
208393_s_at	RAD50	RAD50_1
209349_at	RAD50	RAD50_2
205647_at	RAD52	RAD52_1
210630_s_at	RAD52	RAD52_2
211904_x_at	RAD52	RAD52_3
236880_at	RAD52	RAD52_4
221940_at	RPUSD2	RPUSD2
204351_at	S100P	S100P
221931_s_at	SEH1L	SEH1L_1
223225_s_at	SEH1L	SEH1L_2
200657_at	SLC25A5	SLC25A5
201827_at	SMARCD2	SMARCD2
1562442_a_at	SSBP1	SSBP1_1
202591_s_at	SSBP1	SSBP1_2
214060_at	SSBP1	SSBP1_3
201512_s_at	TOMM70A	TOMM70A_1
201519_at	TOMM70A	TOMM70A_2
1561080_at	TXNRD1	TXNRD1_1
201266_at	TXNRD1	TXNRD1_2

## Sheet: GSE2429 25 genes
Probe Set ID	Gene Symbol	GENE
208674_x_at	DDOST	DDOST_1
208675_s_at	DDOST	DDOST_2
201579_at	FAT1	FAT1
204421_s_at	FGF2	FGF2_1
204422_s_at	FGF2	FGF2_2
200064_at	HSP90AB1	HSP90AB1_1
214359_s_at	HSP90AB1	HSP90AB1_2
211868_x_at	IGHA1	IGHA1_1
211637_x_at	IGHA1	IGHA1_2
211639_x_at	IGHA1	IGHA1_3
211635_x_at	IGHA1	IGHA1_4
217236_x_at	IGHA1	IGHA1_5
211641_x_at	IGHA1	IGHA1_6
211638_at	IGHA1	IGHA1_7
217281_x_at	IGHA1	IGHA1_8
214916_x_at	IGHA1	IGHA1_9
211636_at	IGHA1	IGHA1_10
217217_at	IGHA1	IGHA1_11
217022_s_at	IGHA1	IGHA1_12
211646_at	IGHA1	IGHA1_13
211649_x_at	IGHA1	IGHA1_14
216558_x_at	IGHA1	IGHA1_15
211650_x_at	IGHA1	IGHA1_16
216557_x_at	IGHA1	IGHA1_17
217360_x_at	IGHA1	IGHA1_18
217169_at	IGHA1	IGHA1_19
216510_x_at	IGHA1	IGHA1_20
217084_at	IGHA1	IGHA1_21
216542_x_at	IGHA1	IGHA1_22
201598_s_at	INPPL1	INPPL1
206502_s_at	INSM1	INSM1
205468_s_at	IRF5	IRF5_1
205469_s_at	IRF5	IRF5_2
202424_at	MAP2K2	MAP2K2_1
213487_at	MAP2K2	MAP2K2_2
213490_s_at	MAP2K2	MAP2K2_3
208017_s_at	MCF2	MCF2_1
214884_at	MCF2	MCF2_2
217004_s_at	MCF2	MCF2_3
202107_s_at	MCM2	MCM2
202875_s_at	PBX2	PBX2_1
202876_s_at	PBX2	PBX2_2
211096_at	PBX2	PBX2_3
211097_s_at	PBX2	PBX2_4
203131_at	PDGFRA	PDGFRA_1
211533_at	PDGFRA	PDGFRA_2
215305_at	PDGFRA	PDGFRA_3
202430_s_at	PLSCR1	PLSCR1_1
202446_s_at	PLSCR1	PLSCR1_2
201267_s_at	PSMC3	PSMC3
208393_s_at	RAD50	RAD50_1
209349_at	RAD50	RAD50_2
205647_at	RAD52	RAD52_1
210630_s_at	RAD52	RAD52_2
211904_x_at	RAD52	RAD52_3
221940_at	RPUSD2	RPUSD2
204351_at	S100P	S100P
221931_s_at	SEH1L	SEH1L
200657_at	SLC25A5	SLC25A5
201827_at	SMARCD2	SMARCD2
202591_s_at	SSBP1	SSBP1_1
214060_at	SSBP1	SSBP1_2
201512_s_at	TOMM70A	TOMM70A_1
201519_at	TOMM70A	TOMM70A_2
201266_at	TXNRD1	TXNRD1
