# Supplementary material for: Expression-Based Diagnosis, Treatment Selection, and Drug Development for Breast Cancer
Source: Int J Mol Sci. 2023 Jun 23;24(13):10561. doi: 10.3390/ijms241310561 (PMC10342177; doi:10.3390/ijms241310561)
Supplement: Supplementary file 1 [file ijms-24-10561-s001.zip › Supplementary FIle S4.xlsx]

## Sheet: README
The statistical test results of xCell scores for gene expression level stratified patient groups.
Sheet	Description
RAD52	The results of the two-sample unpaired t-tests comparing the RAD52 high expression group to the low expression group.
PBX2	The results of the two-sample unpaired t-tests comparing the PBX2 high expression group to the low expression group.
RAD52 and PBX2	The results of the ANOVA tests and subsequent post-hoc Tukey's HSD tests conducted on four groups categorized by their RAD52 and PBX2 expression levels.

## Sheet: RAD52
cell_type	t_statistic	p_value	high_RAD52_mean	low_RAD52_mean
Epithelial cells	54.048	7.94755e-263	0.362186	0.12255
Keratinocytes	17.1177	1.49681e-55	0.0466854	0.0146655
CD8+ naive T-cells	16.794	1.39029e-54	0.0118428	0.00313511
Melanocytes	15.6348	1.60994e-48	0.00942401	0.00336715
Sebocytes	14.8158	2.67668e-45	0.0136588	0.00265195
CD4+ Tcm	14.3254	4.6717e-42	0.0123343	0.00158495
Macrophages M2	13.7656	2.5941e-37	0.031003	0.0147383
Osteoblast	13.1839	3.63968e-35	0.0415874	0.0149
Hepatocytes	11.9897	1.309e-29	0.00169029	0.000597001
CLP	11.8824	4.35615e-29	0.0372433	0.0201813
Mesangial cells	9.23529	9.42372e-19	0.0222357	0.012157
Preadipocytes	8.99768	5.06426e-18	0.0379638	0.0141839
MSC	-8.43467	1.06138e-15	0.139195	0.22224
pro B-cells	6.54259	1.08438e-10	0.00957426	0.00412498
Basophils	6.35816	5.5712e-10	0.0815751	0.0572483
Tregs	-6.16206	2.39429e-09	0.00592546	0.0130235
Megakaryocytes	5.85188	8.61453e-09	0.00398764	0.00245153
Pericytes	5.57238	4.1411e-08	0.0396644	0.0242025
Neurons	4.95866	8.94779e-07	0.00449132	0.00239604
Macrophages	4.65938	4.14118e-06	0.0299155	0.0207036
CD4+ memory T-cells	-4.59142	6.57083e-06	0.00319868	0.00910487
Th2 cells	4.40149	1.29698e-05	0.0675909	0.0446911
Chondrocytes	4.13198	4.33964e-05	0.0483087	0.036963
Mast cells	-4.00328	7.57478e-05	0.0167251	0.0198439
CD8+ Tcm	-3.4383	0.000666266	0.0199721	0.0340143
Th1 cells	2.9784	0.00306084	0.101191	0.0855183
Eosinophils	2.93256	0.00345099	0.000249202	7.99885e-05
CMP	2.92745	0.00354461	0.00145645	0.000848681
iDC	2.73034	0.00658329	0.0415393	0.0288121
Monocytes	2.59032	0.00987503	0.00471574	0.00280154
NKT	2.5891	0.0099922	0.0585139	0.0514074
Astrocytes	2.49946	0.0128336	0.09211	0.0795504
CD4+ T-cells	-2.30617	0.0217712	0.00173797	0.0036082
MPP	-2.21965	0.0273385	1.69097e-05	0.000195781
HSC	2.19623	0.028685	0.151585	0.134064
naive B-cells	2.1743	0.0299311	0.00333999	0.00186162
NK cells	-2.1525	0.0323612	5.12407e-05	0.000520664
Fibroblasts	2.02432	0.0435957	0.0777501	0.0673319
Macrophages M1	1.86146	0.0633578	0.0181589	0.0152214
Class-switched memory B-cells	-1.70913	0.0882527	0.0243076	0.0281503
MEP	1.45033	0.147772	0.0373819	0.0342872
MicroenvironmentScore	1.44772	0.148447	0.16485	0.15144
B-cells	1.35248	0.176728	0.0366583	0.029855
ImmuneScore	1.28776	0.198504	0.0761529	0.0673224
Memory B-cells	1.22644	0.220439	0.00669541	0.00482526
CD4+ Tem	1.18821	0.235519	0.0135267	0.011669
Endothelial cells	1.11372	0.266094	0.0595023	0.0550661
CD8+ Tem	-1.05619	0.291815	0.000954354	0.00170373
Plasma cells	-1.00778	0.314326	0.0122451	0.0135057
Adipocytes	-0.98711	0.324268	0.0401414	0.0458374
Erythrocytes	0.764758	0.444715	9.90714e-06	6.8412e-06
StromaScore	0.733561	0.463673	0.0886969	0.0841177
ly Endothelial cells	0.715167	0.474932	0.0198252	0.0184457
aDC	-0.606797	0.544348	0.146756	0.152311
CD4+ naive T-cells	0.596618	0.551047	0.00968552	0.0086355
Tgd cells	-0.439848	0.660324	0.00320189	0.00350489
mv Endothelial cells	-0.404493	0.68609	0.0329562	0.0339351
Neutrophils	-0.366611	0.714211	0.000140597	0.000180628
cDC	-0.30972	0.75693	0.038756	0.0397397
GMP	0.208549	0.834907	0.00131811	0.00124331
CD8+ T-cells	0.204754	0.837875	0.0169708	0.0164037
Skeletal muscle	0.130129	0.896489	0.000847084	0.000784917
Smooth muscle	-0.11967	0.904804	0.155495	0.156281
DC	0.0913798	0.927236	0.0070649	0.00698643
Myocytes	0.0542037	0.956798	0.00299045	0.00295764
Platelets	0.0343919	0.972581	0.000310761	0.000306929
pDC	-0.00766307	0.99389	0.00696194	0.00697282

## Sheet: PBX2
cell_type	t_statistic	p_value	low_PBX2_mean	high_PBX2_mean
Epithelial cells	-89.7633	0	0.0413544	0.371074
Keratinocytes	-24.3133	1.13e-101	0.0079134	0.0494159
CD8+ naive T-cells	-16.5386	6.79e-53	0.00351544	0.0123737
Melanocytes	-15.4106	6.4e-46	0.00332465	0.00985263
Sebocytes	-14.6191	6.82e-44	0.00275292	0.0144063
Preadipocytes	-14.2202	7.88e-42	0.00687536	0.0344944
ly Endothelial cells	-13.8048	6.69e-40	0.00519123	0.0220451
Macrophages M2	14.568	9.01e-37	0.0359314	0.013526
Mast cells	-11.748	4.03e-28	0.0152566	0.0241267
Class-switched memory B-cells	-9.10477	8.36e-19	0.0167474	0.0327304
Endothelial cells	-8.73433	2.36e-17	0.0366352	0.0639485
MicroenvironmentScore	-7.96087	7.33e-15	0.122508	0.182844
Osteoblast	-7.45688	3.8e-13	0.0216906	0.0378857
CD4+ Tem	7.23283	4.54e-12	0.01968	0.00672134
CD4+ T-cells	-6.84519	1.29e-11	0.000427664	0.00334382
Tgd cells	-6.85289	1.47e-11	0.0015628	0.00514398
Th1 cells	6.98166	1.62e-11	0.111571	0.0705775
CD4+ naive T-cells	-6.7799	1.97e-11	0.00289081	0.0111228
CD4+ memory T-cells	-6.77653	2.09e-11	0.00266064	0.00782618
StromaScore	-5.83033	9.62e-09	0.0662751	0.097405
cDC	-5.66718	2.24e-08	0.025805	0.0405142
Monocytes	-5.53101	4.12e-08	0.0023525	0.00571144
B-cells	-5.45589	6.09e-08	0.0163695	0.0382886
ImmuneScore	-5.4329	7.36e-08	0.0562332	0.0854393
CD8+ T-cells	-5.42855	7.76e-08	0.0085847	0.0196352
Th2 cells	-4.92665	1.15e-06	0.0457679	0.0737528
Adipocytes	-4.61572	4.82e-06	0.0303121	0.0526683
pro B-cells	-4.51061	7.81e-06	0.00565197	0.0100251
Erythrocytes	-4.4662	9.01e-06	2.66e-07	1.34e-05
HSC	-4.49295	9.16e-06	0.122697	0.156723
mv Endothelial cells	-4.27584	2.3e-05	0.0270723	0.0358074
Hepatocytes	-4.233	2.83e-05	0.000923202	0.00135865
Megakaryocytes	-4.18305	3.39e-05	0.00296694	0.00408585
Astrocytes	4.07538	5.65e-05	0.0929673	0.0723413
Tregs	-3.50332	0.000507476	0.0104884	0.0145134
CD4+ Tcm	3.46641	0.000597178	0.00921088	0.00563058
Smooth muscle	-3.32086	0.000977821	0.124966	0.145617
Memory B-cells	-3.23335	0.00126077	0.00301437	0.00707632
NK cells	-3.15926	0.00163401	1.17e-05	0.000219347
Mesangial cells	2.95776	0.00330161	0.0179203	0.0145374
naive B-cells	-2.87105	0.00417069	0.00141793	0.00308254
Fibroblasts	-2.61155	0.00932053	0.0656028	0.0781931
Macrophages	2.5578	0.0109187	0.0357758	0.0297579
Neurons	2.55069	0.0112952	0.00563755	0.00360911
pDC	-2.41589	0.0159439	0.00549914	0.00791221
DC	-2.39627	0.016888	0.00514893	0.00682799
Chondrocytes	-2.35103	0.0191955	0.0383042	0.044744
Pericytes	2.32789	0.0204547	0.0399484	0.0325055
iDC	2.28671	0.0226753	0.0393034	0.0296076
Eosinophils	2.06879	0.0394324	0.000330549	0.000132485
CMP	-1.93043	0.0541582	0.00091205	0.00135188
Myocytes	-1.89005	0.0590533	0.00346876	0.00433776
Macrophages M1	1.85545	0.0643339	0.0220233	0.0186278
MEP	1.74566	0.0817324	0.0400359	0.0359912
Skeletal muscle	-1.37767	0.168651	0.000358058	0.000972095
CLP	-1.30607	0.192284	0.0343492	0.0366292
MPP	1.04238	0.297929	6.75e-05	2.75e-05
Plasma cells	0.920514	0.358003	0.013549	0.0123641
aDC	0.838412	0.402273	0.135122	0.128457
Platelets	0.770135	0.441641	0.000353151	0.00027114
GMP	-0.612433	0.540537	0.00125289	0.0014584
Neutrophils	-0.563922	0.572946	9.18e-05	0.000115343
NKT	0.443987	0.657317	0.0532594	0.0520405
Basophils	0.194047	0.846245	0.0729949	0.0722169
CD8+ Tcm	0.143655	0.885836	0.0233787	0.0229461
MSC	0.102497	0.918416	0.179125	0.178178
CD8+ Tem	0.00488625	0.996104	0.000687364	0.000685147

## Sheet: RAD52 and PBX2
cell_type	F_statistic	ANOVA_p_value	PBX2high_RAD52high mean	PBX2low_RAD52low mean	PBX2high_RAD52low mean	PBX2low_RAD52high mean	PBX2low_RAD52low vs PBX2high_RAD52high p_value	PBX2high_RAD52low vs PBX2high_RAD52high p_value	PBX2low_RAD52high vs PBX2high_RAD52high p_value	PBX2high_RAD52low vs. PBX2low_RAD52low p_value	PBX2low_RAD52high vs PBX2low_RAD52low p_value	PBX2low_RAD52high vs PBX2high_RAD52low p_value
Epithelial cells	1236.03	0	0.366124	0.0459895	0.126986	0.0299404	0	0	0	2.87e-12	0.46734	0
Keratinocytes	109.16	8.54e-62	0.0481938	0.00804444	0.0157898	0.00739482	0	0	0	0.348834	0.999042	0.0992912
Macrophages M2	76.1361	1.04e-44	0.0139897	0.0121256	0.0140928	0.0351305	0.803656	0.999872	0	0.83871	0	0
CD8+ naive T-cells	71.8699	2.06e-42	0.0121618	0.00159974	0.00368366	0.00373953	0	0	0	0.421249	0.395429	0.999948
Melanocytes	67.1326	7.8e-40	0.00965574	0.00271058	0.00326462	0.00333542	0	0	0	0.949366	0.92908	0.999753
Mast cells	53.0939	4.96e-32	0.0111821	0.00710686	0.0192129	0.0166763	0.00188152	0	4.05e-11	0	1.33e-12	0.0584922
Preadipocytes	49.5173	5.3e-30	0.039378	0.00782725	0.0134656	0.00588061	1.22e-09	6.26e-13	0	0.747156	0.985615	0.308284
Sebocytes	44.0125	7.56e-27	0.0136407	0.00138846	0.0030301	0.00281278	8.42e-10	0	0	0.872584	0.911954	0.999236
Osteoblast	42.2107	8.32e-26	0.0428197	0.026039	0.0137052	0.020869	0.000625442	0	4.08e-12	0.0606157	0.720307	0.246132
CD4+ Tem	30.3821	7.28e-19	0.00649297	0.0063572	0.0125979	0.0203611	0.999912	0.000391627	0	0.0580269	1.18e-07	0.0003764
CLP	30.031	1.18e-18	0.0354134	0.0182044	0.0194425	0.0338466	1.37e-08	0	0.861608	0.981402	1.06e-05	1.19e-07
Astrocytes	27.5258	3.68e-17	0.0664869	0.015256	0.0850753	0.0895321	3.68e-10	0.0037613	0.000137396	0	0	0.917503
Hepatocytes	27.1895	5.85e-17	0.00160528	0.000696603	0.000586894	0.00102015	8.32e-06	0	5.19e-05	0.956093	0.429027	0.0472931
ly Endothelial cells	25.7485	4.28e-16	0.0219329	0.00566362	0.0206136	0.00444143	3.78e-06	0.938711	1.85e-14	0.000348983	0.987603	1.77e-07
Mesangial cells	25.0101	1.19e-15	0.0162604	0.00118168	0.0133837	0.0178345	0	0.117885	0.613004	5.26e-08	0	0.0344495
MSC	21.0385	2.98e-13	0.143844	0.111073	0.218851	0.167374	0.123641	8.42e-12	0.108467	2.1e-09	0.00523545	0.000649563
CD4+ Tcm	18.9387	5.62e-12	0.00731635	0.00352592	0.000651459	0.0100267	0.0652277	5.49e-09	0.0567257	0.357029	0.00122611	7.36e-11
Th1 cells	18.3687	1.25e-11	0.0666748	0.0595392	0.087887	0.107113	0.837611	0.00241955	1.28e-10	0.0196352	7.16e-06	0.0568619
Tregs	17.2715	5.83e-11	0.00655469	0.0089428	0.0139087	0.00561186	0.407946	1.11e-10	0.817947	0.0251463	0.230585	1.28e-08
Endothelial cells	16.687	1.33e-10	0.0640561	0.0417382	0.058705	0.0328984	0.00514761	0.669715	3.28e-10	0.121588	0.656867	0.000107583
Class-switched memory B-cells	15.1692	1.12e-09	0.0256493	0.0162904	0.0299544	0.0105818	0.0588869	0.355202	5.95e-08	0.00753302	0.536114	4.47e-08
Chondrocytes	13.9418	6.35e-09	0.0457613	0.0172356	0.037349	0.0367724	1.5e-08	0.0571464	0.0346475	0.0012475	0.00181834	0.999097
CD4+ memory T-cells	13.1881	1.84e-08	0.00365148	0.00190699	0.0105755	0.00275458	0.735736	5.91e-08	0.875764	5.59e-05	0.972263	1.9e-06
Basophils	12.7484	3.42e-08	0.0760206	0.0568493	0.0499539	0.0752417	0.0183034	1.15e-07	0.998253	0.793456	0.0665714	9.61e-05
NKT	12.1477	8e-08	0.0508817	0.0257162	0.0535436	0.0518778	7.04e-08	0.823034	0.988119	2.02e-07	1.16e-06	0.973931
NK cells	11.3416	2.5e-07	5.53e-05	6.45e-18	0.000940892	7.72e-06	0.994777	1.64e-07	0.990395	0.00151123	0.99999	2.21e-05
Megakaryocytes	11.2559	2.82e-07	0.00410816	0.00187088	0.00272417	0.00291047	0.000110668	0.000944524	0.00572576	0.478194	0.298085	0.978138
MicroenvironmentScore	9.91678	1.88e-06	0.165259	0.105375	0.157219	0.113685	0.00161731	0.89887	4.82e-05	0.0300804	0.970972	0.0161817
HSC	9.86828	2.01e-06	0.160129	0.12605	0.135637	0.114629	0.0531067	0.0456996	7.75e-06	0.923154	0.877023	0.292093
Tgd cells	9.71002	2.51e-06	0.00468533	9.1e-05	0.0034322	0.00148508	0.000304927	0.393032	0.000327978	0.0485188	0.701669	0.216109
pro B-cells	8.72665	1.01e-05	0.00989124	0.00475523	0.00384366	0.00599386	0.0477407	9.22e-05	0.0259315	0.977969	0.947182	0.616803
Neurons	8.6135	1.18e-05	0.00373697	0.00257417	0.00219999	0.00626239	0.613587	0.099636	0.000910623	0.986025	0.00395713	1.17e-05
cDC	8.58634	1.23e-05	0.0409846	0.0220067	0.0418474	0.0251959	0.00455395	0.996393	0.000409683	0.0117855	0.960374	0.00549271
CD4+ naive T-cells	8.37909	1.65e-05	0.0125044	0.00623529	0.0104159	0.000483452	0.283501	0.833654	7.3e-06	0.726723	0.479742	0.00873481
CMP	8.28058	1.9e-05	0.00170247	0.00119217	0.000446936	0.000566557	0.660028	0.000367376	0.00155391	0.458204	0.605667	0.990467
Th2 cells	8.22504	2.05e-05	0.0721118	0.0369091	0.0466357	0.0485708	0.00568774	0.00407121	0.00922583	0.856484	0.774663	0.997048
mv Endothelial cells	8.08662	2.49e-05	0.0355573	0.0247185	0.0364535	0.0241044	0.0299306	0.988186	0.000193533	0.0447397	0.999081	0.00247929
Macrophages	7.78913	3.79e-05	0.0280972	0.0191374	0.0204072	0.0345768	0.0828123	0.020014	0.0679905	0.991126	0.00198897	0.000162873
StromaScore	7.21497	8.52e-05	0.0905489	0.0613038	0.0870372	0.0619298	0.0230449	0.962037	0.000414514	0.125344	0.999945	0.0313501
CD4+ T-cells	7.09845	0.000100385	0.00225046	0.000675422	0.00475165	0.000184028	0.533536	0.0128817	0.0567002	0.0125685	0.982941	7.75e-05
MEP	6.60379	0.00020132	0.037136	0.041379	0.0271591	0.0387747	0.645103	0.000549604	0.916717	0.00343698	0.92231	0.00191773
Monocytes	5.34148	0.00118041	0.00532297	0.000963376	0.00365625	0.00228038	0.0165472	0.373387	0.0169097	0.378932	0.861725	0.721411
CD8+ T-cells	5.19014	0.00145792	0.0189626	0.012386	0.015879	0.00651411	0.488047	0.779999	0.000756527	0.912311	0.683304	0.10704
CD8+ Tcm	4.98868	0.00193033	0.0221269	0.0333484	0.0262374	0.0112681	0.194121	0.729264	0.0311298	0.689083	0.0035669	0.0160995
Smooth muscle	4.92183	0.00211853	0.154512	0.146399	0.145761	0.124753	0.885773	0.67893	0.000816667	0.999955	0.32237	0.149113
B-cells	4.71716	0.00281567	0.0390253	0.019504	0.0326634	0.0123496	0.273969	0.838154	0.00257389	0.713	0.938614	0.153757
Fibroblasts	3.81929	0.00973379	0.0754221	0.0493859	0.0706415	0.0630471	0.0163224	0.866063	0.183224	0.147958	0.522422	0.766752
ImmuneScore	3.69365	0.0115647	0.0747106	0.0440711	0.0701814	0.0517549	0.0750131	0.957291	0.0483849	0.273769	0.951607	0.363298
CD8+ Tem	3.17594	0.0234302	0.000491147	0.0013984	0.00202441	0.000464844	0.625806	0.02054	0.999956	0.886858	0.699328	0.0949127
Pericytes	3.04398	0.0280153	0.0355936	0.0404205	0.0256746	0.0369547	0.803285	0.0418769	0.983511	0.0750946	0.941467	0.084367
aDC	2.28465	0.0773261	0.125701	0.135722	0.152072	0.133168	0.900546	0.0482514	0.882579	0.757214	0.998689	0.461309
MPP	2.26846	0.0789948	2.5e-05	0.000130263	0.000131271	1.1e-05	0.441519	0.139597	0.992044	0.999999	0.447788	0.222886
Adipocytes	2.1814	0.0885796	0.0416195	0.0314835	0.0447279	0.0279141	0.670781	0.960639	0.128053	0.567905	0.985405	0.152908
Neutrophils	1.85334	0.135772	0.000108688	3.21e-05	0.000271666	0.000107872	0.897326	0.148569	1	0.222773	0.929999	0.336674
DC	1.84483	0.137269	0.0069023	0.00621656	0.00737892	0.00465652	0.967305	0.968351	0.134647	0.902845	0.793609	0.168522
Macrophages M1	1.83046	0.139833	0.0173149	0.016688	0.0152624	0.0210147	0.996272	0.73678	0.250279	0.972153	0.545641	0.108928
Erythrocytes	1.7914	0.147038	1.37e-05	9.1e-07	9.88e-06	4.05e-07	0.518463	0.938552	0.175397	0.833886	0.999961	0.664104
Memory B-cells	1.63402	0.179779	0.00774888	0.00284198	0.00576096	0.00309422	0.51207	0.856578	0.240985	0.889785	0.999914	0.834864
naive B-cells	1.49149	0.215222	0.00380702	0.000884829	0.00235816	0.0022396	0.347067	0.646741	0.581882	0.8846	0.907101	0.999846
Eosinophils	1.04197	0.373069	0.000158948	8.49e-05	0.000110266	0.000279093	0.932501	0.943984	0.507514	0.997942	0.514949	0.420276
pDC	0.877371	0.45223	0.00715979	0.00506295	0.00781009	0.00531019	0.778216	0.975286	0.628984	0.696869	0.999662	0.583034
Myocytes	0.817037	0.484491	0.00283114	0.00456313	0.00295051	0.0028168	0.408731	0.998753	0.999998	0.587555	0.519185	0.99914
iDC	0.655044	0.579857	0.0311641	0.0228242	0.0294169	0.0350804	0.715945	0.989187	0.893436	0.884682	0.523976	0.852297
Platelets	0.594855	0.61844	0.000248844	0.000117722	0.000272578	0.000379542	0.891155	0.997786	0.73848	0.881365	0.594035	0.914156
GMP	0.348182	0.79048	0.00154752	0.000956199	0.00174193	0.00160094	0.82267	0.977586	0.999501	0.745764	0.841546	0.995637
Skeletal muscle	0.222161	0.881034	0.000960849	7.54e-05	0.000858466	0.00036516	0.924334	0.999613	0.931987	0.962867	0.997961	0.979873
Plasma cells	0.186002	0.90595	0.0121334	0.0110341	0.0123383	0.0116685	0.926899	0.99845	0.982345	0.919103	0.989498	0.974893
