# Supplementary material for: Expression-Based Diagnosis, Treatment Selection, and Drug Development for Breast Cancer
Source: Int J Mol Sci. 2023 Jun 23;24(13):10561. doi: 10.3390/ijms241310561 (PMC10342177; doi:10.3390/ijms241310561)
Supplement: Supplementary file 1 [file ijms-24-10561-s001.zip › Supplementary FIle S5.xlsx]

## Sheet: breast cancer cell line detail
	PAM50 Subtype	Count	Proportion		Cancer Subtype	Count	Proportion
	basal	3	0.05		BNNOS; Breast Neoplasm, NOS	1	0.016129
	basal_A	16	0.266667		BRCA; Invasive Breast Carcinoma	19	0.306452
	basal_B	11	0.183333		BRCNOS; Invasive Breast Carcinoma	3	0.0483871
	HER2_amp	13	0.216667		DCIS; Breast Ductal Carcinoma In Situ	5	0.0806452
	luminal	15	0.25		IDC; Invasive Breast Carcinoma	28	0.451613
	luminal_HER2_amp	2	0.0333333		ILC; Invasive Breast Carcinoma	6	0.0967742
	NA	3	0.05		NA; Immortalized Breast Cells	1	0.016129
ModelID	PatientID	CellLineName	StrippedCellLineName	Age	SourceType	SangerModelID	RRID	DepmapModelType	GrowthPattern	MolecularSubtype	PrimaryOrMetastasis	SampleCollectionSite	Sex	SourceDetail	CatalogNumber	CCLEName	COSMICID	PublicComments	WTSIMasterCellID	OncotreeCode	OncotreeSubtype	OncotreePrimaryDisease	OncotreeLineage
ACH-000097	PT-k1TO7o	ZR-75-1	ZR751	63	Commercial	SIDM00314	CVCL_0588	IDC	Adherent	luminal	Metastatic	ascites	Female	ATCC		ZR751_BREAST				IDC	Breast Invasive Ductal Carcinoma	Invasive Breast Carcinoma	Breast
ACH-000828	PT-mV0nNw	ZR-75-30	ZR7530	47	Commercial	SIDM00971	CVCL_1661	ILC	Adherent	HER2_amp	Metastatic	ascites	Female	ATCC		ZR7530_BREAST	909907		429	ILC	Breast Invasive Lobular Carcinoma	Invasive Breast Carcinoma	Breast
ACH-000111	PT-yKJqsn	HCC1187	HCC1187	41	Commercial	SIDM00885	CVCL_1247	IDC	Mixed	basal_A	Primary	breast	Female	ATCC		HCC1187_BREAST	749711		1644	IDC	Breast Invasive Ductal Carcinoma	Invasive Breast Carcinoma	Breast
ACH-000148	PT-sW6DWH	Hs 578T	HS578T	74	Commercial	SIDM00135	CVCL_0332	BRCNOS	Adherent	basal_B	Primary	breast	Female	ATCC		HS578T_BREAST	905957		655	BRCNOS	Breast Invasive Carcinoma, NOS	Invasive Breast Carcinoma	Breast
ACH-000196	PT-ZerhVq	HCC1599	HCC1599	44	Commercial	SIDM00877	CVCL_1256	IDC	Suspension	basal_A	Primary	breast	Female	ATCC		HCC1599_BREAST	749713		1264	IDC	Breast Invasive Ductal Carcinoma	Invasive Breast Carcinoma	Breast
ACH-000223	PT-Vntr9y	HCC1937	HCC1937	24	Commercial	SIDM00874	CVCL_0290	IDC	Adherent	basal_A	Primary	breast	Female	ATCC		HCC1937_BREAST	749714		936	IDC	Breast Invasive Ductal Carcinoma	Invasive Breast Carcinoma	Breast
ACH-000276	PT-S4bLNM	HCC38	HCC38	50	Commercial	SIDM00675	CVCL_1267	IDC	Adherent	basal_A	Primary	breast	Female	ATCC		HCC38_BREAST	749717		1318	IDC	Breast Invasive Ductal Carcinoma	Invasive Breast Carcinoma	Breast
ACH-000277	PT-osxHUh	HCC1419	HCC1419	42	Commercial	SIDM00882	CVCL_1251	IDC	Unknown	HER2_amp	Primary	breast	Female	ATCC		HCC1419_BREAST	907045		1551	IDC	Breast Invasive Ductal Carcinoma	Invasive Breast Carcinoma	Breast
ACH-000288	PT-hgWgpg	BT-549	BT549	72	Commercial	SIDM00122	CVCL_1092	BRCNOS	Adherent	basal_B	Primary	breast	Female	ATCC		BT549_BREAST	905951		1835	BRCNOS	Breast Invasive Carcinoma, NOS	Invasive Breast Carcinoma	Breast
ACH-000349	PT-nuy7MI	HCC1500	HCC1500	32	Commercial	SIDM00879	CVCL_1254	DCIS	Adherent	luminal	Primary	breast	Female	ATCC		HCC1500_BREAST	1303900		653	DCIS	Breast Ductal Carcinoma In Situ	Breast Ductal Carcinoma In Situ	Breast
ACH-000374	PT-UPBMOO	HCC1143	HCC1143	52	Commercial	SIDM00866	CVCL_1245	IDC	Adherent	basal_A	Primary	breast	Female	ATCC		HCC1143_BREAST	749710		1316	IDC	Breast Invasive Ductal Carcinoma	Invasive Breast Carcinoma	Breast
ACH-000536	PT-jtQBfm	BT-20	BT20	74	Commercial	SIDM00893	CVCL_0178	IDC	Adherent	basal_A	Primary	breast	Female	ATCC		BT20_BREAST	906801	SNP fingerprinting rules out HeLa contamination.	2264	IDC	Breast Invasive Ductal Carcinoma	Invasive Breast Carcinoma	Breast
ACH-000554	PT-i8kZN9	UACC-893	UACC893	57	Commercial	SIDM01186	CVCL_1782	ILC	Adherent	HER2_amp	Primary	breast	Female	ATCC		UACC893_BREAST	909778		1090	ILC	Breast Invasive Lobular Carcinoma	Invasive Breast Carcinoma	Breast
ACH-000568	PT-4c0rgH	UACC-812	UACC812	43	Commercial	SIDM01187	CVCL_1781	ILC	Mixed	luminal	Primary	breast	Female	ATCC		UACC812_BREAST	910910		1754	ILC	Breast Invasive Lobular Carcinoma	Invasive Breast Carcinoma	Breast
ACH-000624	PT-j1ziCB	HCC1806	HCC1806	60	Commercial	SIDM00875	CVCL_1258	DCIS	Adherent	basal_A	Primary	breast	Female	ATCC		HCC1806_BREAST	907047		1317	DCIS	Breast Ductal Carcinoma In Situ	Breast Ductal Carcinoma In Situ	Breast
ACH-000642	PT-FzOtZ1	HMEL	HMEL		Academic lab		CVCL_IZ34	ZIMMBR	Mixed			breast	Female	Jesse Boehm (Broad)		HMEL_BREAST					Immortalized Breast Cells	Non-Cancerous	Breast
ACH-000643	PT-wBDiHn	HDQ-P1	HDQP1	50	Commercial	SIDM01062	CVCL_2067	IDC	Unknown	basal_A	Primary	breast	Female	DSMZ		HDQP1_BREAST	1290922		743	IDC	Breast Invasive Ductal Carcinoma	Invasive Breast Carcinoma	Breast
ACH-000668	PT-3DyHhv	HCC70	HCC70	49	Commercial	SIDM00673	CVCL_1270	IDC	Adherent	basal_A	Primary	breast	Female	ATCC		HCC70_BREAST	907048		937	IDC	Breast Invasive Ductal Carcinoma	Invasive Breast Carcinoma	Breast
ACH-000691	PT-vOaofa	HCC2157	HCC2157	48	Commercial	SIDM00774	CVCL_1261	IDC	Unknown	basal_A	Primary	breast	Female	ATCC		HCC2157_BREAST	749715		351	IDC	Breast Invasive Ductal Carcinoma	Invasive Breast Carcinoma	Breast
ACH-000699	PT-8MisfZ	HCC1395	HCC1395	43	Commercial	SIDM00884	CVCL_1249	IDC	Adherent	basal_B	Primary	breast	Female	ATCC		HCC1395_BREAST	749712		94	IDC	Breast Invasive Ductal Carcinoma	Invasive Breast Carcinoma	Breast
ACH-000725	PT-gUhFHU	HCC202	HCC202	82	Commercial	SIDM00870	CVCL_2062	DCIS	Adherent	HER2_amp	Primary	breast	Female	ATCC		HCC202_BREAST	1290906		1552	DCIS	Breast Ductal Carcinoma In Situ	Breast Ductal Carcinoma In Situ	Breast
ACH-000755	PT-DxHqyx	HCC2218	HCC2218	38	Commercial	SIDM00772	CVCL_1263	DCIS	Suspension	HER2_amp	Primary	breast	Female	ATCC		HCC2218_BREAST	749716		352	DCIS	Breast Ductal Carcinoma In Situ	Breast Ductal Carcinoma In Situ	Breast
ACH-000818	PT-EQndr2	BT-483	BT483	23	Commercial	SIDM00892	CVCL_2319	IDC	Adherent	luminal	Primary	breast	Female	ATCC		BT483_BREAST	949093		1231	IDC	Breast Invasive Ductal Carcinoma	Invasive Breast Carcinoma	Breast
ACH-000857	PT-IcfZvW	CAL-85-1	CAL851	35	Commercial	SIDM00928	CVCL_1114	IDC	Adherent	basal_A	Primary	breast	Female	DSMZ		CAL851_BREAST	910852		113	IDC	Breast Invasive Ductal Carcinoma	Invasive Breast Carcinoma	Breast
ACH-000859	PT-603OA3	HCC1954	HCC1954	61	Commercial	SIDM00872	CVCL_1259	DCIS	Adherent	basal_A	Primary	breast	Female	ATCC		HCC1954_BREAST	749709		2143	DCIS	Breast Ductal Carcinoma In Situ	Breast Ductal Carcinoma In Situ	Breast
ACH-000927	PT-Az6j9u	BT-474	BT474	60	Commercial	SIDM00963	CVCL_0179	IDC	Adherent	HER2_amp	Primary	breast	Female	ATCC		BT474_BREAST	946359		412	IDC	Breast Invasive Ductal Carcinoma	Invasive Breast Carcinoma	Breast
ACH-000930	PT-AHaEgg	HCC1569	HCC1569	70	Commercial	SIDM00878	CVCL_1255	IDC	Adherent	basal_A	Primary	breast	Female	ATCC		HCC1569_BREAST	907046		2127	IDC	Breast Invasive Ductal Carcinoma	Invasive Breast Carcinoma	Breast
ACH-001388	PT-UklPiT	SUM-102PT	SUM102PT	57			CVCL_3421	IDC		basal	Primary	breast	Female	Asterand		SUM102PT_BREAST				IDC	Breast Invasive Ductal Carcinoma	Invasive Breast Carcinoma	Breast
ACH-001390	PT-SMhk4C	SUM-149PT	SUM149PT	40			CVCL_3422	IDC		basal_B	Primary	breast	Female	Asterand		SUM149PT_BREAST				IDC	Breast Invasive Ductal Carcinoma	Invasive Breast Carcinoma	Breast
ACH-001391	PT-OlQpj4	SUM-159PT	SUM159PT	71			CVCL_5423	BRCA		basal_B	Primary	breast	Female	Asterand		SUM159PT_BREAST				BRCA	Invasive Breast Carcinoma	Invasive Breast Carcinoma	Breast
ACH-001393	PT-Zd61pI	SUM-190PT	SUM190PT				CVCL_3423	BRCA		basal_A	Primary	breast	Female	Asterand		SUM190PT_BREAST				BRCA	Invasive Breast Carcinoma	Invasive Breast Carcinoma	Breast
ACH-001419	PT-vA9Pcv	VP229	VP229	47	Commercial		CVCL_2754	IDC			Primary	breast	Female	Sigma-Aldrich		VP229_BREAST				IDC	Breast Invasive Ductal Carcinoma	Invasive Breast Carcinoma	Breast
ACH-000934	PT-0VWXIm	MDA-MB-361	MDAMB361	40	Commercial	SIDM00528	CVCL_0620	BRCA	Adherent	HER2_amp	Metastatic	central_nervous_system	Female	ATCC		MDAMB361_BREAST	908121		880	BRCA	Invasive Breast Carcinoma	Invasive Breast Carcinoma	Breast
ACH-000910	PT-TFQ2Kc	MDA-MB-453	MDAMB453	48	Commercial	SIDM00272	CVCL_0418	BRCA	Adherent	HER2_amp	Metastatic	pericardial_effusion	Female	ATCC		MDAMB453_BREAST	908122		101	BRCA	Invasive Breast Carcinoma	Invasive Breast Carcinoma	Breast
ACH-000017	PT-8CE6ah	SK-BR-3	SKBR3	43	Commercial	SIDM00897	CVCL_0033	BRCA	Adherent	HER2_amp	Metastatic	pleural_effusion	Female	ATCC		SKBR3_BREAST				BRCA	Invasive Breast Carcinoma	Invasive Breast Carcinoma	Breast
ACH-000019	PT-viJKnw	MCF7	MCF7	69	Commercial	SIDM00148	CVCL_0031	BRCA	Adherent	luminal	Metastatic	pleural_effusion	Female	ATCC		MCF7_BREAST	905946		588	BRCA	Invasive Breast Carcinoma	Invasive Breast Carcinoma	Breast
ACH-000028	PT-viJKnw	KPL-1	KPL1	69	Commercial	SIDM00147	CVCL_2094	BRCA	Adherent	luminal	Metastatic	pleural_effusion	Female	DSMZ		KPL1_BREAST		SNP fingerprinting confirms that this line is an MCF-7 derivative. DepMap metadata has been updated (as of 22Q2) to reflect this.		BRCA	Invasive Breast Carcinoma	Invasive Breast Carcinoma	Breast
ACH-000044	PT-HMBfbj	MDA-MB-134-VI	MDAMB134VI	47	Commercial	SIDM00005	CVCL_0617	ILC	Unknown	luminal	Metastatic	pleural_effusion	Female	ATCC		MDAMB134VI_BREAST				ILC	Breast Invasive Lobular Carcinoma	Invasive Breast Carcinoma	Breast
ACH-000117	PT-qkpbqp	EFM-192A	EFM192A	46	Commercial	SIDM01002	CVCL_1812	BRCA	Unknown	HER2_amp	Metastatic	pleural_effusion	Female	DSMZ		EFM192A_BREAST	1290798		1187	BRCA	Invasive Breast Carcinoma	Invasive Breast Carcinoma	Breast
ACH-000147	PT-9WkxWW	T-47D	T47D	54	Commercial	SIDM00097	CVCL_0553	IDC	Adherent	luminal	Metastatic	pleural_effusion	Female	ATCC		T47D_BREAST	905945		1286	IDC	Breast Invasive Ductal Carcinoma	Invasive Breast Carcinoma	Breast
ACH-000212	PT-y6HadC	CAL-120	CAL120	43	Commercial	SIDM00940	CVCL_1104	BRCA	Adherent	basal_B	Metastatic	pleural_effusion	Female	DSMZ		CAL120_BREAST	906826		1748	BRCA	Invasive Breast Carcinoma	Invasive Breast Carcinoma	Breast
ACH-000248	PT-8CE6ah	AU565	AU565	43	Commercial	SIDM00898	CVCL_1074	BRCA	Adherent	HER2_amp	Metastatic	pleural_effusion	Female	ATCC		AU565_BREAST	910704		726	BRCA	Invasive Breast Carcinoma	Invasive Breast Carcinoma	Breast
ACH-000330	PT-ykXL80	EFM-19	EFM19	50	Commercial	SIDM01056	CVCL_0253	IDC	Adherent	luminal	Metastatic	pleural_effusion	Female	DSMZ		EFM19_BREAST	906851		1786	IDC	Breast Invasive Ductal Carcinoma	Invasive Breast Carcinoma	Breast
ACH-000352	PT-jBpXJh	HCC1428	HCC1428	49	Commercial	SIDM00881	CVCL_1252	BRCA	Adherent	luminal	Metastatic	pleural_effusion	Female	ATCC		HCC1428_BREAST	1290905		1567	BRCA	Invasive Breast Carcinoma	Invasive Breast Carcinoma	Breast
ACH-000573	PT-aOGEYV	MDA-MB-436	MDAMB436	43	Commercial	SIDM00629	CVCL_0623	BRCNOS	Adherent	basal_B	Metastatic	pleural_effusion	Female	ATCC		MDAMB436_BREAST	1240172		927	BRCNOS	Breast Invasive Carcinoma, NOS	Invasive Breast Carcinoma	Breast
ACH-000621	PT-ER2PWK	MDA-MB-157	MDAMB157	44	Commercial	SIDM00529	CVCL_0618	IDC	Adherent	basal_B	Metastatic	pleural_effusion	Female	ATCC		MDAMB157_BREAST	925338		1796	IDC	Breast Invasive Ductal Carcinoma	Invasive Breast Carcinoma	Breast
ACH-000711	PT-K0vetf	JIMT-1	JIMT1	62	Commercial	SIDM01037	CVCL_2077	IDC	Unknown	basal_A	Metastatic	pleural_effusion	Female	DSMZ		JIMT1_BREAST	1298157		479	IDC	Breast Invasive Ductal Carcinoma	Invasive Breast Carcinoma	Breast
ACH-000721	PT-tXW4rS	HMC-1-8	HMC18	35	Commercial		CVCL_2949	IDC	Unknown	basal_B	Metastatic	pleural_effusion	Female	HSRRB		HMC18_BREAST				IDC	Breast Invasive Ductal Carcinoma	Invasive Breast Carcinoma	Breast
ACH-000759	PT-maODOx	MDA-MB-175-VII	MDAMB175VII	56	Commercial	SIDM00633	CVCL_1400	IDC	Adherent	HER2_amp	Metastatic	pleural_effusion	Female	ATCC		MDAMB175VII_BREAST	908120		50	IDC	Breast Invasive Ductal Carcinoma	Invasive Breast Carcinoma	Breast
ACH-000768	PT-pYG6Rc	MDA-MB-231	MDAMB231	51	Commercial	SIDM00146	CVCL_0062	BRCA	Adherent	basal_B	Metastatic	pleural_effusion	Female	ATCC		MDAMB231_BREAST	905960		1013	BRCA	Invasive Breast Carcinoma	Invasive Breast Carcinoma	Breast
ACH-000783	PT-dK1tBm	CAMA-1	CAMA1	51	Commercial	SIDM00920	CVCL_1115	ILC	Adherent	luminal	Metastatic	pleural_effusion	Female	ATCC		CAMA1_BREAST	946382		363	ILC	Breast Invasive Lobular Carcinoma	Invasive Breast Carcinoma	Breast
ACH-000849	PT-58loXx	MDA-MB-468	MDAMB468	51	Commercial	SIDM00628	CVCL_0419	BRCA	Adherent	basal_A	Metastatic	pleural_effusion	Female	ATCC		MDAMB468_BREAST	908123		415	BRCA	Invasive Breast Carcinoma	Invasive Breast Carcinoma	Breast
ACH-000856	PT-PgOEtc	CAL-51	CAL51	45	Commercial	SIDM00933	CVCL_1110	BRCA	Adherent	basal_B	Metastatic	pleural_effusion	Female	DSMZ		CAL51_BREAST	910927		4	BRCA	Invasive Breast Carcinoma	Invasive Breast Carcinoma	Breast
ACH-000876	PT-FjJcwU	MDA-MB-415	MDAMB415	38	Commercial	SIDM00630	CVCL_0621	BRCA	Adherent	HER2_amp	Metastatic	pleural_effusion	Female	ATCC		MDAMB415_BREAST	924240		344	BRCA	Invasive Breast Carcinoma	Invasive Breast Carcinoma	Breast
ACH-000902	PT-vbLgiZ	CAL-148	CAL148	58	Commercial	SIDM00938	CVCL_1106	IDC	Suspension	luminal_HER2_amp	Metastatic	pleural_effusion	Female	DSMZ		CAL148_BREAST	924106		1610	IDC	Breast Invasive Ductal Carcinoma	Invasive Breast Carcinoma	Breast
ACH-001392	PT-i9dYpA	SUM-185PE	SUM185PE				CVCL_5591	BRCA		luminal	Metastatic	pleural_effusion	Female	Asterand		SUM185PE_BREAST				BRCA	Invasive Breast Carcinoma	Invasive Breast Carcinoma	Breast
ACH-001394	PT-jgjbSo	SUM-229PE	SUM229PE				CVCL_5594	BRCA		basal	Metastatic	pleural_effusion	Female	Asterand		SUM229PE_BREAST		SNP fingerprinting rules out SUM149PT contamination.		BRCA	Invasive Breast Carcinoma	Invasive Breast Carcinoma	Breast
ACH-001395	PT-VCE3zi	SUM-44PE	SUM44PE				CVCL_3424	ILC		luminal	Metastatic	pleural_effusion	Female	Asterand		SUM44PE_BREAST				ILC	Breast Invasive Lobular Carcinoma	Invasive Breast Carcinoma	Breast
ACH-001396	PT-sYFvXw	SUM-52PE, SUM52	SUM52PE				CVCL_3425	BRCA		luminal	Metastatic	pleural_effusion	Female	Asterand		SUM52PE_BREAST				BRCA	Invasive Breast Carcinoma	Invasive Breast Carcinoma	Breast
ACH-001819	PT-FVLPZS	MFM-223	MFM223		Commercial	SIDM00332	CVCL_1408	IDC		luminal	Metastatic	pleural_effusion	Female	DSMZ		MFM223_BREAST				IDC	Breast Invasive Ductal Carcinoma	Invasive Breast Carcinoma	Breast
ACH-001820	PT-UXPdpL	COLO-824	COLO824	52	Commercial	SIDM00954	CVCL_1136	BNNOS			Metastatic	pleural_effusion	Female	DSMZ		COLO824_BREAST				BNNOS	Breast Neoplasm, NOS	Breast Neoplasm, NOS	Breast
ACH-000258	PT-XTyUEa	Du4475	DU4475	62	Commercial	SIDM01001	CVCL_1183	BRCA	Suspension	luminal_HER2_amp	Metastatic	skin	Female	ATCC		DU4475_BREAST	906844		302	BRCA	Invasive Breast Carcinoma	Invasive Breast Carcinoma	Breast
ACH-001389	PT-huyXeM	SUM-1315MO2	SUM1315MO2				CVCL_5589	IDC		basal	Metastatic	skin	Female	Asterand		SUM1315MO2_BREAST				IDC	Breast Invasive Ductal Carcinoma	Invasive Breast Carcinoma	Breast

## Sheet: mutation
gene	ModelID	PatientID	CellLineName	StrippedCellLineName	Chrom	Pos	Ref	Alt	AF	RefCount	AltCount	GT	PS	VariantType	VariantInfo	DNAChange	ProteinChange	HgncName	HgncFamily	Transcript	TranscriptExon	TranscriptStrand	UniprotID	Str	DbsnpID	DbsnpFilter	Issues	GcContent	LineageAssociation	CancerMolecularGenetics	CCLEDeleterious	StructuralRelation	CosmicHotspot	CosmicOverlappingMutations	AssociatedWith	LoF	Driver	LikelyDriver	TranscriptLikelyLoF	CivicID	CivicDescription	CivicScore	Popaf	LikelyGoF	LikelyLoF	HessDriver	HessSignature	CscapeScore	DannScore
FAT1	ACH-000117	PT-qkpbqp	EFM-192A	EFM192A	chr4	186619980	G	A	0.791	9	36	0/1	NA	SNP	SILENT	c.6606C>T	p.V2202V	FAT atypical cadherin 1	Cadherin related	ENST00000441802.7	10	-	Q14517	NA	NA	NA	NA	0.473815	NA	NA	NA	NA	NA	NA	NA	NA	NA	NA	NA	NA	NA	NA	7.3	NA	NA	NA	NA	0.119097	NA
MCF2	ACH-000212	PT-y6HadC	CAL-120	CAL120	chrX	139602462	T	C	0.944	0	17	1|1	NA	SNP	MISSENSE	c.1780A>G	p.N594D	MCF.2 cell line derived transforming sequence	Rho guanine nucleotide exchange factors	ENST00000370576.9	16	-	P10911	NA	rs149562038	NA	as_specific	0.346633	NA	NA	NA	NA	NA	NA	NA	NA	NA	NA	NA	NA	NA	NA	3.23	NA	NA	NA	NA	NA	0.835376
PDGFRA	ACH-000111	PT-yKJqsn	HCC1187	HCC1187	chr4	54295158	G	A	0.947	0	16	1|1	NA	SNP	SILENT	c.3156G>A	p.T1052T	platelet derived growth factor receptor alpha	I-set domain containing CD molecules Receptor Tyrosine Kinases	ENST00000257290.10	23	+	P16234	NA	rs55996208	NA	as_specific	0.518703	\L	M	O\	Dom	NA	FIP1L1	NA	NA	structural_relation;	NA	NA	NA	NA	NA	NA	NA	3.19	NA	NA	NA	NA
RPUSD2	ACH-000117	PT-qkpbqp	EFM-192A	EFM192A	chr15	40571821	G	A	0.458	19	16	0/1	NA	SNP	MISSENSE	c.641G>A	p.R214H	RNA pseudouridylate synthase domain containing 2	RNA pseudouridylate synthase domain containing	ENST00000559271.1	2	+	Q8IZ73	NA	rs1459835965	NA	as_specific	0.538653	NA	NA	NA	NA	NA	NA	NA	NA	NA	NA	NA	NA	NA	NA	7.3	NA	NA	NA	NA	0.886005	0.745068
RPUSD2	ACH-000196	PT-ZerhVq	HCC1599	HCC1599	chr15	40574028	G	A	0.459	20	17	0/1	NA	SNP	MISSENSE	c.1222G>A	p.E408K	RNA pseudouridylate synthase domain containing 2	RNA pseudouridylate synthase domain containing	ENST00000559271.1	3	+	Q8IZ73	NA	NA	NA	NA	0.551122	NA	NA	NA	NA	NA	NA	gene_function_loss;	NA	NA	NA	NA	NA	NA	NA	7.3	NA	Y	NA	NA	0.333548	0.996206
SLC25A5	ACH-000117	PT-qkpbqp	EFM-192A	EFM192A	chrX	119470436	CT	GG	0.25	38	13	0|1	119470436	DNP	MISSENSE	c.662_663CT>GG	p.T221R	solute carrier family 25 member 5	Solute carriers	ENST00000317881.9	3	+	P05141	NA	NA	NA	NA	0.462687	NA	NA	NA	NA	NA	NA	NA	NA	NA	NA	NA	NA	NA	NA	7.3	NA	NA	NA	NA	NA	NA
SLC25A5	ACH-000111	PT-yKJqsn	HCC1187	HCC1187	chrX	119470043	AC	GT	0.24	41	11	0|1	119469962	DNP	MISSENSE	c.494_495AC>GT	p.Y165C	solute carrier family 25 member 5	Solute carriers	ENST00000317881.9	2	+	P05141	NA	NA	NA	NA	0.49005	NA	NA	NA	NA	NA	NA	NA	NA	NA	NA	NA	NA	NA	NA	7.3	NA	NA	NA	NA	NA	NA
SLC25A5	ACH-000212	PT-y6HadC	CAL-120	CAL120	chrX	119469909	TG	CT	0.158	23	4	0|1	119469906	DNP	MISSENSE	c.360_361TG>CT	p.G121C	solute carrier family 25 member 5	Solute carriers	ENST00000317881.9	2	+	P05141	NA	NA	NA	NA	0.512438	NA	NA	NA	NA	NA	NA	NA	NA	NA	NA	NA	NA	NA	NA	7.3	NA	NA	NA	NA	NA	NA
SLC25A5	ACH-000212	PT-y6HadC	CAL-120	CAL120	chrX	119471054	CA	TG	0.214	21	6	0|1	119471038	DNP	MISSENSE	c.893_894CA>TG	p.T298M	solute carrier family 25 member 5	Solute carriers	ENST00000317881.9	4	+	P05141	NA	NA	NA	NA	0.415423	NA	NA	NA	NA	NA	NA	NA	NA	NA	NA	NA	NA	NA	NA	7.3	NA	NA	NA	NA	NA	NA
SLC25A5	ACH-000097	PT-k1TO7o	ZR-75-1	ZR751	chrX	119470436	CT	GG	0.226	43	12	0|1	119470436	DNP	MISSENSE	c.662_663CT>GG	p.T221R	solute carrier family 25 member 5	Solute carriers	ENST00000317881.9	3	+	P05141	NA	NA	NA	NA	0.462687	NA	NA	NA	NA	NA	NA	NA	NA	NA	NA	NA	NA	NA	NA	7.3	NA	NA	NA	NA	NA	NA
SLC25A5	ACH-000223	PT-Vntr9y	HCC1937	HCC1937	chrX	119469909	TG	CT	0.208	20	4	0|1	119469906	DNP	MISSENSE	c.360_361TG>CT	p.G121C	solute carrier family 25 member 5	Solute carriers	ENST00000317881.9	2	+	P05141	NA	NA	NA	NA	0.512438	NA	NA	NA	NA	NA	NA	NA	NA	NA	NA	NA	NA	NA	NA	7.3	NA	NA	NA	NA	NA	NA
SLC25A5	ACH-000019	PT-viJKnw	MCF7	MCF7	chrX	119469909	TG	CT	0.179	24	4	0|1	119469901	DNP	MISSENSE	c.360_361TG>CT	p.G121C	solute carrier family 25 member 5	Solute carriers	ENST00000317881.9	2	+	P05141	NA	NA	NA	NA	0.512438	NA	NA	NA	NA	NA	NA	NA	NA	NA	NA	NA	NA	NA	NA	7.3	NA	NA	NA	NA	NA	NA
SLC25A5	ACH-000223	PT-Vntr9y	HCC1937	HCC1937	chrX	119470436	CT	GG	0.628	19	32	0|1	119470436	DNP	MISSENSE	c.662_663CT>GG	p.T221R	solute carrier family 25 member 5	Solute carriers	ENST00000317881.9	3	+	P05141	NA	NA	NA	NA	0.462687	NA	NA	NA	NA	NA	NA	NA	NA	NA	NA	NA	NA	NA	NA	7.3	NA	NA	NA	NA	NA	NA
SLC25A5	ACH-000019	PT-viJKnw	MCF7	MCF7	chrX	119470436	CT	GG	0.403	38	26	0|1	119470436	DNP	MISSENSE	c.662_663CT>GG	p.T221R	solute carrier family 25 member 5	Solute carriers	ENST00000317881.9	3	+	P05141	NA	NA	NA	NA	0.462687	NA	NA	NA	NA	NA	NA	NA	NA	NA	NA	NA	NA	NA	NA	7.3	NA	NA	NA	NA	NA	NA
SLC25A5	ACH-000248	PT-8CE6ah	AU565	AU565	chrX	119470436	CT	GG	0.488	21	22	0|1	119470436	DNP	MISSENSE	c.662_663CT>GG	p.T221R	solute carrier family 25 member 5	Solute carriers	ENST00000317881.9	3	+	P05141	NA	NA	NA	NA	0.462687	NA	NA	NA	NA	NA	NA	NA	NA	NA	NA	NA	NA	NA	NA	7.3	NA	NA	NA	NA	NA	NA
SLC25A5	ACH-000147	PT-9WkxWW	T-47D	T47D	chrX	119470436	CT	GG	0.4	11	7	0|1	119470436	DNP	MISSENSE	c.662_663CT>GG	p.T221R	solute carrier family 25 member 5	Solute carriers	ENST00000317881.9	3	+	P05141	NA	NA	NA	NA	0.462687	NA	NA	NA	NA	NA	NA	NA	NA	NA	NA	NA	NA	NA	NA	7.3	NA	NA	NA	NA	NA	NA
SMARCD2	ACH-000117	PT-qkpbqp	EFM-192A	EFM192A	chr17	63835514	C	A	0.981	0	53	1|1	NA	SNP	SILENT	c.621G>T	p.A207A	SWI/SNF related, matrix associated, actin dependent regulator of chromatin, subfamily d, member 2	NA	ENST00000448276.7	5	-	Q92925	NA	rs200160126	NA	as_specific	0.533666	NA	NA	NA	NA	NA	NA	NA	NA	NA	NA	NA	NA	NA	NA	4.31	NA	NA	NA	NA	0.209061	NA
[truncated: 10 more columns]

## Sheet: fusion
gene	ModelID	PatientID	CellLineName	StrippedCellLineName	FusionName	JunctionReadCount	SpanningFragCount	SpliceType	LeftGene	LeftBreakpoint	RightGene	RightBreakpoint	LargeAnchorSupport	FFPM	LeftBreakDinuc	LeftBreakEntropy	RightBreakDinuc	RightBreakEntropy	annots	CCLE_count	otherFusionGene
HSP90AB1	ACH-000117	PT-qkpbqp	EFM-192A	EFM192A	HSP90AB1--MT-ND4	3	3	INCL_NON_REF_SPLICE	HSP90AB1 (ENSG00000096384.19)	chr6:44251112:+	MT-ND4 (ENSG00000198886.2)	chrM:11234:+	YES_LDAS	0.0502	TG	1.5656	TT	1.6729	[\INTERCHROMOSOMAL[chr6--chrM]\]	1	MT-ND4
HSP90AB1	ACH-000930	PT-AHaEgg	HCC1569	HCC1569	PPP1R1B--HSP90AB1	3	2	INCL_NON_REF_SPLICE	PPP1R1B (ENSG00000131771.13)	chr17:39634034:+	HSP90AB1 (ENSG00000096384.19)	chr6:44252195:+	YES_LDAS	0.0531	GA	1.4295	AT	1.4295	[\INTERCHROMOSOMAL[chr17--chr6]\]	1	PPP1R1B
SMARCD2	ACH-000097	PT-k1TO7o	ZR-75-1	ZR751	RNF213--SMARCD2	3	0	ONLY_REF_SPLICE	RNF213 (ENSG00000173821.19)	chr17:80350396:+	SMARCD2 (ENSG00000108604.15)	chr17:63835567:-	YES_LDAS	0.0503	GT	1.9329	AG	1.8295	[\INTRACHROMOSOMAL[chr17:16.42Mb]\]	1	RNF213
