# Supplementary material for: Expression-Based Diagnosis, Treatment Selection, and Drug Development for Breast Cancer
Source: Int J Mol Sci. 2023 Jun 23;24(13):10561. doi: 10.3390/ijms241310561 (PMC10342177; doi:10.3390/ijms241310561)
Supplement: Supplementary file 1 [file ijms-24-10561-s001.zip › Supplementary FIle S6.xlsx]

## Sheet: CMap Input Selection
Proliferation genes that had significant dependency scores in at least 50% of the tested NSCLC cell lines in RNAi (n = 34).
geneName	count	AU565	BT20	BT474	CAL120	CAL51	EFM19	HCC1143	HCC1187	HCC1395	HCC1428	HCC1500	HCC1569	HCC1806	HCC1937	HCC1954	HCC202	HCC2218	HCC38	HCC70	HS578T	KPL1	MCF7	MDAMB157	MDAMB175VII	MDAMB231	MDAMB361	MDAMB415	MDAMB436	MDAMB453	MDAMB468	T47D	UACC812	ZR751	ZR7530
MCM2	20	-0.231567	-0.304366	-0.49318	-0.58645	-0.481499	-0.333142	-0.380611	-0.508743	-0.492399	-0.724422	-0.961568	-0.320715	-0.769005	-0.509878	-0.804955	-0.477235	-0.93835	-0.453432	-0.597729	-0.396809	-0.451922	-0.585302	-0.524694	-0.853878	-0.789453	-0.980345	-0.573644	-0.855144	-0.562361	-0.896209	-0.279422	-0.496413	-0.746476	-0.808322
SEH1L	20	-0.680318	NA	NA	NA	NA	NA	-0.666724	NA	NA	-0.966664	-0.584678	-1.05172	-0.625515	-0.549518	NA	-0.673523	NA	-0.704188	NA	-0.946015	-0.352169	NA	-0.598318	-1.07181	-0.556488	-0.646108	-0.893087	-0.813913	NA	-0.589021	-1.02869	-0.902941	-0.786055	NA
SSBP1	17	-0.843581	NA	NA	NA	NA	NA	-0.754187	NA	NA	-0.780635	-0.608075	-0.696804	-0.78126	-0.694126	NA	-0.525873	NA	-0.465798	NA	-0.445929	-0.989892	NA	-0.684879	-0.443855	-0.799333	-0.698004	-0.488646	-0.769205	NA	-0.846858	-0.652437	-0.84596	-0.649214	NA
Proliferation genes that had significant dependency scores in at least 50% of the tested NSCLC cell lines in CRISPR-Cas9 (n = 48).
geneName	count	SKBR3	MCF7	KPL1	ZR751	HCC1187	T47D	HS578T	CAL120	HCC1937	AU565	DU4475	HCC38	HCC1419	BT549	EFM19	HCC1428	HCC1143	UACC893	MDAMB436	MDAMB157	HCC1806	HCC70	HCC1395	JIMT1	HMC18	HCC202	MDAMB231	CAMA1	MDAMB468	CAL51	HCC1954	MDAMB415	MDAMB453	MDAMB361	EVSAT	SUM102PT	SUM1315MO2	SUM149PT	SUM159PT	SUM185PE	SUM190PT	SUM229PE	SUM52PE	VP229	MFM223	COLO824	OCUBM	21NT
MCM2	48	-2.35428	-1.87429	-1.57109	-1.76613	-1.97471	-1.72123	-2.36554	-1.63875	-1.93675	-1.97758	-2.55739	-1.48752	-2.38758	-1.78771	-1.68382	-2.15804	-1.741	-0.613434	-1.83311	-2.05358	-2.02269	-2.33547	-1.94594	-1.37406	-2.43348	-1.84383	-2.07631	-2.82234	-2.19149	-1.56961	-1.90877	-2.26342	-1.7973	-2.60599	-1.99493	-2.2271	-2.21602	-2.39744	-2.19289	-2.02748	-1.44641	-2.54873	-1.43337	-2.07964	-1.90052	-1.79038	-1.30862	-2.12622
SEH1L	46	-1.55381	-1.30264	-0.805662	-1.19658	-0.848182	-1.4647	-0.877204	-1.12582	-1.05943	-0.980541	-0.823537	-1.25182	-1.26267	-1.15006	-1.62131	-1.37492	-0.990012	-0.918944	-0.931418	-1.82101	-0.900155	-0.773863	-1.02458	-1.33152	-1.63042	-1.06828	-0.720625	-0.836202	-1.28942	-0.589411	-0.987449	-1.70754	-1.0967	-0.86369	-1.71901	-0.791641	-0.977551	-0.176656	-1.0062	-0.414159	-1.4394	-0.905717	-1.73237	-1.22944	-1.27616	-0.772819	-0.684283	-0.760574
DDOST	39	-1.21633	-0.649423	-0.427359	-0.636011	-0.42101	-0.622292	-0.736342	-0.932339	-0.904333	-0.629983	-0.573258	-0.661514	-1.04537	-0.875328	-0.680537	-0.679782	-0.492441	-0.422458	-1.13614	-0.742042	-0.72745	-0.517441	-1.00616	-0.662852	-0.689238	-0.314399	-0.961731	-0.644311	-0.744167	-0.878673	-0.472867	-0.542352	-0.488292	-0.160386	-1.12019	-1.14591	-0.690366	-1.06611	-0.841303	-0.460121	-0.771968	-0.988956	-0.53403	-1.01248	-0.858423	-0.734666	-0.537474	-0.740173
SLC25A5	32	-0.401539	-0.316803	-0.696213	-0.533838	-0.849517	-0.374574	-0.603526	-0.482713	-0.542406	-0.253138	-0.28964	-0.573422	-0.451213	-0.541637	-0.482702	-0.500781	-0.608365	-0.597491	-0.72285	-0.418065	-0.415684	-0.859967	-0.567761	-0.402136	-0.570967	-0.518891	-0.782011	-0.452601	-0.505791	-0.59754	-0.545119	-0.63476	-0.713144	-0.542244	-0.408075	-0.581406	-0.387516	-0.564793	-0.502295	-0.858629	-0.73773	-0.440885	-0.888742	-0.555266	-0.443021	-0.739948	-0.94201	-0.584588
Hazard genes in TCGA-BRCA mRNA prognostic analysis.
gene	logrank test p value	Hazard Ratio	95% Confidence Interval
RAD50	0.0318973	1.3037	[1.0231, 1.6612]
SLC25A5	0.0473014	1.3162	[1.0032, 1.7269]
TOMM70A	0.0146067	1.508	[1.0844, 2.0972]
TXNRD1	0.0345432	1.2365	[1.0156, 1.5054]
Pan-resistant genes for the studied 18 drugs in mRNA drug response.
drugName	measure	Gene	t.statistic	p.value	mean(Resistant)	mean(Sensitive)	dataset	Category
5-fluorouracil	IC50	HSP90AB1	2.60754	0.0329356	10.1893	9.65892	GDSC2	Resistant
capecitabine	EC50	HSP90AB1	3.02219	0.00503727	10.3469	9.87463	PRISM	Resistant
capecitabine	LN_EC50	HSP90AB1	2.07366	0.0482562	10.2981	9.94988	PRISM	Resistant
methotrexate	LN_IC50	HSP90AB1	2.12933	0.0428672	10.2803	9.96792	GDSC1	Resistant
5-fluorouracil	EC50	INPPL1	2.66387	0.0260687	6.68202	5.92148	PRISM	Resistant
docetaxel	LN_EC50	INPPL1	2.63665	0.0172081	6.7998	6.17199	PRISM	Resistant
docetaxel	LN_IC50	INPPL1	2.10578	0.0444573	6.74363	6.20832	GDSC1	Resistant
lapatinib	LN_EC50	INPPL1	2.72414	0.011889	6.48078	5.91127	PRISM	Resistant
vinorelbine	IC50	INPPL1	4.17349	0.00598467	7.02179	6.22667	PRISM	Resistant
vinorelbine	LN_EC50	INPPL1	2.65692	0.0197976	6.81552	6.10189	PRISM	Resistant
vinorelbine	LN_IC50	INPPL1	2.2324	0.0476105	6.81552	6.20558	PRISM	Resistant
docetaxel	LN_IC50	IRF5	2.30639	0.0365875	2.7422	1.76919	PRISM	Resistant
alpelisib	LN_IC50	RAD50	2.26012	0.035636	4.41332	4.00902	GDSC2	Resistant
neratinib	IC50	RAD50	2.67757	0.0207043	4.50029	3.97543	PRISM	Resistant
neratinib	LN_IC50	RAD50	2.80886	0.0132234	4.48105	3.97543	PRISM	Resistant
List of downregulated genes as CMap input.
MCM2
SEH1L
SSBP1
HSP90AB1
INPPL1
IRF5
RAD50
DDOST
SLC25A5
TOMM70A
TXNRD1

## Sheet: CMap Results
Significantly enriched drug sets
id	set_type	set_size	src_set_size	num_hiq_sig	pct_hiq_sig	num_uniq_pert	pct_src_pert	src_set_id	cell_iname	pert_type	is_filtered_set	desc	raw_cs	fdr_q_nlog10	norm_cs	abs_raw_cs
CP_SRC_INHIBITOR:OCILY10:TRT_CP	PCL	3	7	2	66.6667	3	42.8571	CP_SRC_INHIBITOR	OCILY10	TRT_CP	TRUE	CP_SRC_INHIBITOR:OCILY10:trt_cp	-0.9577	1.2716	-1.941	0.9577
CP_LEUCINE_RICH_REPEAT_KINASE_INHIBITOR:THP1:TRT_CP	PCL	3	3	3	100	3	100	CP_LEUCINE_RICH_REPEAT_KINASE_INHIBITOR	THP1	TRT_CP	TRUE	CP_LEUCINE_RICH_REPEAT_KINASE_INHIBITOR:THP1:trt_cp	-0.9531	1.2448	-1.9317	0.9531
BRUTON'S_TYROSINE_KINASE_(BTK)_INHIBITOR:OCILY10:TRT_CP	MOA_CLASS	6	8	5	83.3333	6	75	BRUTON'S_TYROSINE_KINASE_(BTK)_INHIBITOR	OCILY10	TRT_CP	TRUE	BRUTON'S_TYROSINE_KINASE_(BTK)_INHIBITOR:OCILY10:trt_cp	-0.9232	15.6536	-2.5818	0.9232
ANDROGEN_RECEPTOR_AGONIST:VCAP:TRT_CP	MOA_CLASS	8	14	6	75	5	35.7143	ANDROGEN_RECEPTOR_AGONIST	VCAP	TRT_CP	TRUE	ANDROGEN_RECEPTOR_AGONIST:VCAP:trt_cp	-0.9173	15.6536	-2.8524	0.9173
Drugs in the significantly enriched drug sets
src_set_id	Name	Type	Perturbagen Id	Target	MOA
CP_SRC_INHIBITOR	PP-1	trt_cp	BRD-K47598052	HCK, RET, SRC	SRC inhibitor, ABL inhibitor
CP_SRC_INHIBITOR	PP-2	trt_cp	BRD-K95785537	SRC, LCK, ABL1, LYN, RIPK2	SRC inhibitor
CP_SRC_INHIBITOR	ZM-306416	trt_cp	BRD-K41337261	FLT1, KDR, EGFR, FLT4	ABL inhibitor, SRC inhibitor, VEGFR inhibitor
CP_SRC_INHIBITOR	dasatinib	trt_cp	BRD-K49328571	ABL1, FYN, LCK, SRC, KIT, YES1, BCR, EPHA2, LYN, PDGFRB, ABL2, BTK, DDR1, DDR2, PDGFRA, STAT5B	BCR-ABL kinase inhibitor, Ephrin inhibitor, KIT inhibitor, PDGFR receptor inhibitor, SRC inhibitor, Tyrosine kinase inhibitor
CP_SRC_INHIBITOR	saracatinib	trt_cp	BRD-K19540840	SRC, ABL1, LCK, YES1	SRC inhibitor
CP_SRC_INHIBITOR	WH-4023	trt_cp	BRD-U44618005	ABL1, LCK, SRC	SRC inhibitor
CP_SRC_INHIBITOR	bosutinib	trt_cp	BRD-K99964838	ABL1, SRC, BCR, CAMK2G, LYN, CAMK1D, CDK2, FRK, FYN, HCK, MAP2K1, MAP2K2, MAP3K2, MAP4K5, STK10, STK24, STK4, TNK2, TXK	ABL inhibitor, BCR-ABL kinase inhibitor, SRC inhibitor
CP_LEUCINE_RICH_REPEAT_KINASE_INHIBITOR	XMD-1150	trt_cp	BRD-K01436366	LRRK2	Leucine rich repeat kinase inhibitor
CP_LEUCINE_RICH_REPEAT_KINASE_INHIBITOR	XMD-892	trt_cp	BRD-K50387473	MAPK7, DCLK2, LRRK2, PLK4, TNK1	MAP kinase inhibitor
CP_LEUCINE_RICH_REPEAT_KINASE_INHIBITOR	XMD-885	trt_cp	BRD-K64857848	LRRK2, MAPK7	Leucine rich repeat kinase inhibitor, MAP kinase inhibitor
BRUTON'S_TYROSINE_KINASE_(BTK)_INHIBITOR	LFM-A13	trt_cp	BRD-A30655177	BTK	BTK inhibitor
BRUTON'S_TYROSINE_KINASE_(BTK)_INHIBITOR	QL-XII-47	trt_cp	BRD-U86922168	BMX, BTK	BTK inhibitor, Cytoplasmic tyrosine protein kinase BMX inhibitor
BRUTON'S_TYROSINE_KINASE_(BTK)_INHIBITOR	terreic-acid	trt_cp	BRD-A64228451	BTK	BTK inhibitor
ANDROGEN_RECEPTOR_AGONIST	testosterone	trt_cp	BRD-A55393291	AR, CYP19A1, CYP2C19, CYP2C8, CYP3A5	Androgen receptor agonist
ANDROGEN_RECEPTOR_AGONIST	testosterone	trt_cp	BRD-A48720949	AR, CYP19A1, CYP2C19, CYP2C8, CYP3A5	androgen receptor agonist
ANDROGEN_RECEPTOR_AGONIST	myricetin	trt_cp	BRD-K43149758	PIK3CG, AR, CYP3A4	Androgen receptor agonist, Cytochrome P450 inhibitor
ANDROGEN_RECEPTOR_AGONIST	oxymetholone	trt_cp	BRD-A23637604	AR	Androgen receptor agonist
ANDROGEN_RECEPTOR_AGONIST	tibolone	trt_cp	BRD-K10467831	AR, ESR1, PGR, STS	Androgen receptor agonist, Estrogen receptor agonist, Progesterone receptor agonist
