# Supplementary material for: Expression-Based Diagnosis, Treatment Selection, and Drug Development for Breast Cancer
Source: Int J Mol Sci. 2023 Jun 23;24(13):10561. doi: 10.3390/ijms241310561 (PMC10342177; doi:10.3390/ijms241310561)
Supplement: Supplementary file 1 [file ijms-24-10561-s001.zip › Supplementary File S7.xlsx]

## Sheet: README
The resistant and sensitive genes for each selected new drug.
Sheet	Description
bosutinib	The genome-wide drug sensitivity of bosutinib at both the mRNA and protein level.
dasatinib	The genome-wide drug sensitivity of dasatinib at both the mRNA and protein level.
dasatinib fusion mutation	Fusions and mutations in BRCA cell lines for genes that are either sensitive or resistant to dasatinib.
PP-1	The genome-wide drug sensitivity of PP-1 at both the mRNA and protein level.
PP-2	The genome-wide drug sensitivity of PP-2 at protein level.
saracatinib	The genome-wide drug sensitivity of saracatinib at both the mRNA and protein level.
ZM-306416	The genome-wide drug sensitivity of ZM-306416 at both the mRNA and protein level.

## Sheet: bosutinib
The drug sensitivity results for bosutinib in mRNA level.										The drug sensitivity results for bosutinib in protein level.
drugName	measure	Gene	t.statistic	p.value	mean(Resistant)	mean(Sensitive)	FC(R/S)	Category		drugName	measure	Gene	t.statistic	p.value	mean(Resistant)	mean(Sensitive)	FC(R-S)	Category
bosutinib	LN_EC50	BTK	-6.35179	0.0242996	0.0703239	0.188978	0.372127	Sensitive		bosutinib	EC50	NFIP2	2.99973	0.0346504	0.960594	-0.625917	1.58651	Resistant
bosutinib	LN_EC50	ADRB1	8.74174	0.0143423	1.16787	0.107995	10.8142	Resistant		bosutinib	EC50	PIGB	-4.04091	0.0212459	-0.657897	0.359099	-1.017	Sensitive
bosutinib	LN_EC50	PDZD4	-11.7884	0.0101177	0.239201	2.83689	0.0843181	Sensitive		bosutinib	EC50	PP12C	3.53732	0.0349635	0.286638	-0.736677	1.02331	Resistant
bosutinib	LN_EC50	ERO1B	4.38593	0.0488587	1.47188	0.543799	2.70665	Resistant		bosutinib	EC50	NCAM1	-2.46906	0.0493431	-1.38061	0.339811	-1.72043	Sensitive
bosutinib	LN_EC50	SCML2	-10.4893	0.0260944	0.262283	2.48139	0.1057	Sensitive		bosutinib	EC50	G5E9P1	-2.73519	0.0331146	-1.07062	0.0313508	-1.10197	Sensitive
bosutinib	LN_EC50	CCL22	10.8338	0.0118845	0.708474	0.06309	11.2296	Resistant		bosutinib	EC50	AHNK2	-2.89652	0.0214812	-0.775734	0.58517	-1.3609	Sensitive
bosutinib	LN_EC50	OLFM2	-5.43825	0.0358572	0.92544	2.21436	0.417927	Sensitive		bosutinib	EC50	H3BQQ2	8.54806	0.0330522	-0.379459	-1.84685	1.46739	Resistant
bosutinib	LN_EC50	ARHGDIB	14.6476	0.00508679	7.61632	1.85517	4.10545	Resistant		bosutinib	EC50	LIPB2	5.48592	0.00167641	0.834741	-1.18188	2.01662	Resistant
bosutinib	LN_EC50	RIPOR2	16.3265	0.0251787	1.66587	0.0423723	39.3152	Resistant		bosutinib	EC50	CPEB3	-2.51933	0.0399712	-1.03221	0.118904	-1.15112	Sensitive
bosutinib	LN_EC50	BMP5	-18.4593	0.00309135	0.0351947	1.01024	0.0348378	Sensitive		bosutinib	EC50	BGH3	-2.43627	0.0450281	-1.11404	0.0161324	-1.13017	Sensitive
bosutinib	LN_EC50	SLC4A3	-7.71668	0.017721	1.09752	3.15003	0.348415	Sensitive		bosutinib	EC50	BEND5	2.67808	0.0447952	0.810318	-0.589987	1.40031	Resistant
bosutinib	LN_EC50	CHST10	-6.93789	0.0406068	1.60137	3.42935	0.466959	Sensitive		bosutinib	EC50	KCD15	2.99145	0.0151759	0.49868	-0.523314	1.02199	Resistant
bosutinib	LN_EC50	WIPF1	-45.9518	0.00100934	0.0693417	4.5551	0.0152229	Sensitive		bosutinib	EC50	H0YDG6	2.90806	0.0342647	0.257697	-1.17163	1.42933	Resistant
bosutinib	LN_EC50	GJA3	-6.84424	0.0394467	0.00717764	0.110969	0.0646813	Sensitive		bosutinib	EC50	STING	3.56008	0.00810196	1.0064	-1.25857	2.26497	Resistant
bosutinib	LN_EC50	ARHGAP9	-15.5128	0.00429782	0.0908375	0.232648	0.390451	Sensitive		bosutinib	EC50	MPRI	-2.64927	0.0396247	-0.721583	0.306599	-1.02818	Sensitive
bosutinib	LN_EC50	SH3TC1	11.5119	0.0252265	1.97715	0.389525	5.0758	Resistant		bosutinib	EC50	BGLR	-2.96812	0.0233266	-0.606546	0.515209	-1.12176	Sensitive
bosutinib	LN_EC50	GPR18	8.78241	0.0155318	0.268921	0.0703239	3.82404	Resistant		bosutinib	EC50	EFC4B	2.88029	0.0314674	0.743391	-0.831832	1.57522	Resistant
bosutinib	LN_EC50	PRKCG	15.7493	0.0198707	0.66857	0.0565168	11.8296	Resistant		bosutinib	EC50	ANR44	-2.62079	0.0307198	-0.633725	0.469005	-1.10273	Sensitive
bosutinib	LN_EC50	GNGT1	-13.2669	0.0206104	0.0420321	0.650647	0.0646005	Sensitive		bosutinib	EC50	CLN3	-4.62412	0.00239781	-0.405804	0.706573	-1.11238	Sensitive
bosutinib	LN_EC50	MCHR1	5.65443	0.0299846	0.0634864	0.00717764	8.84502	Resistant		bosutinib	EC50	PHAG1	-2.70965	0.0328887	-1.04345	-0.0148676	-1.02858	Sensitive
bosutinib	LN_EC50	CHN1	-16.6649	0.00388482	0.34353	3.47822	0.0987663	Sensitive		bosutinib	EC50	HNRPU	-2.96452	0.027095	-0.0635893	1.53276	-1.59635	Sensitive
bosutinib	LN_EC50	HRC	6.45528	0.0495338	0.51999	0.124085	4.19059	Resistant		bosutinib	EC50	PXDN	-2.8006	0.0208199	-0.0632416	1.3889	-1.45214	Sensitive
bosutinib	LN_EC50	RAI2	-12.599	0.0139323	0.0420321	1.10916	0.0378955	Sensitive		bosutinib	EC50	B4GN1	-3.51851	0.0244882	-1.22644	1.28578	-2.51222	Sensitive
bosutinib	LN_EC50	CHIT1	-6.56229	0.0499559	0.0142846	0.11768	0.121385	Sensitive		bosutinib	EC50	ADPRH	-3.11599	0.0326354	-0.0021108	1.42759	-1.4297	Sensitive
bosutinib	LN_EC50	SFTPD	-5.8888	0.036813	0.139765	0.931593	0.150028	Sensitive		bosutinib	EC50	ZBTB4	-3.0347	0.030584	-0.153626	1.06355	-1.21718	Sensitive
bosutinib	LN_EC50	DTNA	-11.1094	0.0170462	0.344784	4.40857	0.0782076	Sensitive		bosutinib	EC50	CD14	-2.74141	0.0401814	0.158817	1.74787	-1.58905	Sensitive
bosutinib	LN_EC50	CCM2	-2.0135	0.199571	0.128385	0.437969	0.293136	Sensitive		bosutinib	EC50	ITA5	-2.84133	0.0198433	-0.695624	0.771887	-1.46751	Sensitive
bosutinib	LN_EC50	APH1B	-5.17696	0.035859	1.54734	3.46313	0.446803	Sensitive		bosutinib	EC50	CORO6	2.59868	0.0438408	0.52075	-0.915327	1.43608	Resistant
bosutinib	LN_EC50	ERP27	28.7574	0.0221287	3.96084	0.687061	5.7649	Resistant		bosutinib	EC50	LRP11	-3.63111	0.0322366	-0.0275616	1.14292	-1.17048	Sensitive
bosutinib	LN_EC50	TMEM108	-9.84692	0.0288156	0.0351947	0.416749	0.0844506	Sensitive		bosutinib	EC50	KCRB	2.52021	0.0468839	0.675969	-0.826864	1.50283	Resistant
bosutinib	LN_EC50	CYP4V2	5.92337	0.0274297	2.64209	0.764411	3.45638	Resistant		bosutinib	EC50	RBL2B	4.10631	0.00609762	0.50048	-0.647756	1.14824	Resistant
bosutinib	LN_EC50	PRSS35	8.23596	0.024106	0.833878	0.0900739	9.25771	Resistant		bosutinib	EC50	K1731	-3.37259	0.0156387	-0.367205	0.71326	-1.08046	Sensitive
bosutinib	LN_EC50	SPARCL1	-13.0366	0.0199987	0.0425763	0.485096	0.087769	Sensitive		bosutinib	EC50	RHOQ	-3.27516	0.0223037	-0.551481	0.468676	-1.02016	Sensitive
bosutinib	LN_EC50	ZIC1	-35.5669	0.00294456	0.0824575	5.0818	0.016226	Sensitive		bosutinib	EC50	FBLN1	3.20284	0.0156571	1.47195	-0.190917	1.66287	Resistant
bosutinib	LN_EC50	KCNE2	5.12471	0.0462203	0.635653	0.0881614	7.21011	Resistant		bosutinib	EC50	FHL1	-3.38582	0.0128082	-1.24275	0.794299	-2.03705	Sensitive
bosutinib	LN_EC50	FOXH1	4.89204	0.0462448	1.23973	0.235464	5.26507	Resistant		bosutinib	EC50	FHL1	-2.88783	0.0192345	-1.39581	0.209315	-1.60512	Sensitive
bosutinib	LN_EC50	ELAVL4	-6.56229	0.0499559	0.0142846	0.11768	0.121385	Sensitive		bosutinib	EC50	VKOR1	-2.71592	0.0247268	-0.143073	0.906105	-1.04918	Sensitive
bosutinib	LN_EC50	SCNN1D	6.85353	0.030434	1.94363	0.965085	2.01394	Resistant		bosutinib	EC50	RN138	3.3658	0.0202759	0.49792	-0.562419	1.06034	Resistant
bosutinib	LN_EC50	LRRIQ3	10.7097	0.0086164	0.92919	0.303931	3.05723	Resistant		bosutinib	EC50	ARMX1	-4.05816	0.00975042	-0.517514	1.77976	-2.29727	Sensitive
bosutinib	LN_EC50	PM20D1	-7.77644	0.0321329	0.00717764	0.124267	0.0577597	Sensitive		bosutinib	EC50	SEM3C	-2.3124	0.0484821	-0.0460829	1.4935	-1.53958	Sensitive
bosutinib	LN_EC50	DISC1	-16.4233	0.00765081	0.129109	1.53037	0.0843644	Sensitive		bosutinib	EC50	F192A	2.72622	0.0237149	0.270763	-1.07254	1.34331	Resistant
bosutinib	LN_EC50	DCST1	6.352	0.0242908	0.201579	0.0840001	2.39975	Resistant		bosutinib	EC50	MUC18	-2.45546	0.0484703	-1.04202	0.270074	-1.31209	Sensitive
bosutinib	LN_EC50	TGM4	9.9393	0.0120084	0.256897	0.0284998	9.01399	Resistant		bosutinib	EC50	GDIR2	4.05741	0.00285357	1.97556	-1.18755	3.16311	Resistant
bosutinib	LN_EC50	ADGRF2	5.65443	0.0299846	0.0634864	0.00717764	8.84502	Resistant		bosutinib	EC50	DEN1A	3.26907	0.0236621	0.532564	-0.516882	1.04945	Resistant
bosutinib	LN_EC50	TXLNB	-11.8169	0.0130429	0.0142846	0.333242	0.0428655	Sensitive		bosutinib	EC50	CHCH6	3.26649	0.0130565	0.428548	-0.682306	1.11085	Resistant
bosutinib	LN_EC50	LIPC	5.64179	0.0387873	0.268723	0.0633543	4.24158	Resistant		bosutinib	EC50	CA226	3.80786	0.00744857	1.4257	0.126431	1.29927	Resistant
bosutinib	LN_EC50	PPP1R14D	9.31003	0.0298411	0.480182	0.143677	3.34209	Resistant		bosutinib	EC50	UCHL3	3.03785	0.0192931	0.247541	-0.866039	1.11358	Resistant
bosutinib	LN_EC50	PRTG	-15.8622	0.0228667	0.311933	2.15818	0.144535	Sensitive		bosutinib	EC50	HAGHL	-3.39881	0.0197983	-0.698962	0.930644	-1.62961	Sensitive
bosutinib	LN_EC50	BEAN1	14.0395	0.00503856	1.17849	0.110041	10.7096	Resistant		bosutinib	EC50	THEM4	-3.24823	0.0138718	-1.31315	0.0785141	-1.39167	Sensitive
bosutinib	LN_EC50	MYO1A	13.3995	0.0474229	0.130916	0.0426443	3.06995	Resistant		bosutinib	EC50	F122B	2.88331	0.038921	0.448494	-0.828537	1.27703	Resistant
bosutinib	LN_EC50	ADRA1B	-17.6937	0.0359418	0.0143553	0.130916	0.109653	Sensitive		bosutinib	EC50	CC50B	3.30531	0.0285818	1.96104	0.16484	1.7962	Resistant
bosutinib	LN_EC50	SLC23A1	34.8053	0.000987765	1.89099	0.304215	6.21597	Resistant		bosutinib	EC50	FUT3	6.79552	0.0144973	1.39575	-0.926518	2.32227	Resistant
bosutinib	LN_EC50	NPAS2	11.7934	0.0106888	3.86433	1.13152	3.41517	Resistant		bosutinib	EC50	ODBB	2.83138	0.0206634	0.627894	-0.462008	1.0899	Resistant
bosutinib	LN_EC50	NRTN	7.59005	0.0271551	1.68243	0.489537	3.43677	Resistant		bosutinib	EC50	SCRB1	-3.45914	0.0106434	-0.262193	0.799058	-1.06125	Sensitive
bosutinib	LN_EC50	PRSS27	8.32453	0.0299884	3.73695	1.26913	2.94449	Resistant		bosutinib	EC50	ASM3A	-3.39957	0.0127858	-1.54187	0.166041	-1.70791	Sensitive
bosutinib	LN_EC50	ZIC4	-57.4698	0.0110763	0	2.62338	0	Sensitive		bosutinib	EC50	SFXN5	-8.04669	0.000239311	-1.20396	0.0517355	-1.25569	Sensitive
bosutinib	LN_EC50	KBTBD11	6.42861	0.0247768	0.939147	0.303079	3.09869	Resistant		bosutinib	EC50	I27L2	-2.94831	0.0420469	-1.53938	0.792478	-2.33186	Sensitive
bosutinib	LN_EC50	C9orf50	-20.0218	0.03177	0.0772268	0.214125	0.360663	Sensitive		bosutinib	EC50	FHIT	2.59419	0.0299115	0.286169	-0.923537	1.20971	Resistant
bosutinib	LN_EC50	DNHD1	5.30737	0.0408373	3.31834	1.47619	2.24791	Resistant		bosutinib	EC50	R3HD4	6.30396	0.00194223	0.383148	-0.805247	1.1884	Resistant
bosutinib	LN_EC50	ALOX15B	12.4156	0.0454009	1.13149	0.0142846	79.2104	Resistant		bosutinib	EC50	SPRR3	2.95056	0.0321569	2.15787	-0.948481	3.10636	Resistant
bosutinib	LN_EC50	GPBAR1	-11.5236	0.0167601	0.104321	0.262984	0.396682	Sensitive		bosutinib	EC50	YIF1B	-2.71828	0.0263828	-0.302827	0.760296	-1.06312	Sensitive
bosutinib	LN_EC50	CFAP65	-5.65452	0.0299798	0.0356067	0.0908375	0.391983	Sensitive		bosutinib	EC50	CNBP1	2.73888	0.0474546	0.177298	-1.04372	1.22102	Resistant
bosutinib	LN_EC50	DCAF4L1	4.73542	0.0442859	0.427118	0.195004	2.19031	Resistant		bosutinib	IC50	TFR2	-4.75082	0.0177037	-0.436432	0.896806	-1.33324	Sensitive
bosutinib	LN_EC50	PLCB1	-12.4215	0.035885	0.154588	4.04002	0.0382642	Sensitive		bosutinib	IC50	K1161	3.4163	0.0421807	0.922145	-0.225308	1.14745	Resistant
bosutinib	LN_EC50	C2CD4C	-6.18104	0.0263497	0.126571	1.04632	0.120967	Sensitive		bosutinib	IC50	TPM4	-8.66707	0.0126016	-0.654439	0.841642	-1.49608	Sensitive
bosutinib	LN_EC50	SHC4	-433.29	0.00146927	0.201634	1.39231	0.144819	Sensitive		bosutinib	IC50	WFS1	-6.07509	0.0257037	-0.135428	1.20962	-1.34505	Sensitive
bosutinib	LN_EC50	CFAP73	25.5923	0.0129942	1.23219	0.238735	5.16133	Resistant		bosutinib	IC50	MTSSL	-18.5973	0.0192116	-0.312019	0.908697	-1.22072	Sensitive
bosutinib	LN_EC50	H1.6	-5.742	0.0488146	0.0282918	0.360883	0.0783959	Sensitive		bosutinib	IC50	NDUV3	20.1629	0.0153514	-0.218989	-1.57831	1.35932	Resistant
bosutinib	LN_EC50	ADAM32	-13.512	0.00549521	0.108801	1.60207	0.0679131	Sensitive		bosutinib	IC50	PI51A	-5.59672	0.0115692	-0.707975	0.657957	-1.36593	Sensitive
bosutinib	LN_EC50	BRINP2	-17.7308	0.0358668	0	1.65917	0	Sensitive		bosutinib	IC50	ALDOC	-5.75525	0.0201506	-1.2711	0.597053	-1.86815	Sensitive
bosutinib	LN_EC50	C17orf107	-6.8879	0.032751	0.458238	1.55832	0.29406	Sensitive		bosutinib	IC50	TENS3	-4.18725	0.0378179	-0.277791	1.04797	-1.32576	Sensitive
bosutinib	LN_EC50	ARHGEF38	4.52799	0.049865	2.42381	0.621956	3.89707	Resistant		bosutinib	IC50	HNRPC	6.86621	0.00685897	0.412267	-0.63574	1.04801	Resistant
bosutinib	LN_EC50	CORT	13.2715	0.0478783	0.459193	0.111031	4.13571	Resistant		bosutinib	IC50	LRIG2	7.15706	0.0327053	1.36936	-0.0889869	1.45834	Resistant
bosutinib	LN_EC50	RTL5	-5.56339	0.0324205	0.507035	1.4169	0.357848	Sensitive		bosutinib	IC50	DYST	-4.18534	0.0267235	-0.714439	0.302256	-1.01669	Sensitive
bosutinib	LN_EC50	HCAR3	6.05205	0.033722	1.2806	0.250299	5.11629	Resistant		bosutinib	IC50	PTTG	-3.75871	0.034402	0.301517	1.45802	-1.15651	Sensitive
bosutinib	LN_EC50	PPIAL4D	-15.5465	0.040893	0	0.104321	0	Sensitive		bosutinib	IC50	SACS	-5.02841	0.0292743	-0.358377	0.691711	-1.05009	Sensitive
bosutinib	LN_EC50	SPESP1	-52.0815	0.012222	0	3.3053	0	Sensitive		bosutinib	IC50	CA2D1	-4.45194	0.024704	-0.913186	0.743351	-1.65654	Sensitive
bosutinib	LN_EC50	ERVV.1	13.4112	0.0473817	0.0908375	0	Inf	Resistant		bosutinib	IC50	RRAS	-3.3546	0.0494538	-0.398108	0.715531	-1.11364	Sensitive
bosutinib	LN_EC50	SMIM32	-19.7067	0.00276002	0.0496139	0.232648	0.213258	Sensitive		bosutinib	IC50	TAF9B	4.71829	0.0198561	0.785794	-0.704588	1.49038	Resistant
bosutinib	LN_EC50	TPTE	-1.41186	0.392326	0	0.0492098	0	Sensitive		bosutinib	IC50	CPNE7	-5.68582	0.0139932	-0.494477	0.772784	-1.26726	Sensitive
										bosutinib	IC50	DAB2	-13.7319	0.000846961	-0.690451	1.55742	-2.24787	Sensitive
										bosutinib	IC50	TFB1M	3.8275	0.0347917	-0.105065	-1.30988	1.20482	Resistant
										bosutinib	IC50	FKBP5	5.37219	0.0306691	0.368991	-1.54992	1.91891	Resistant
										bosutinib	IC50	ALDR	-13.0238	0.00419846	-0.890085	0.60774	-1.49782	Sensitive
										bosutinib	IC50	RHEB	-6.67597	0.0347212	-0.324668	0.790223	-1.11489	Sensitive
										bosutinib	IC50	GFPT2	-6.70715	0.0254793	-0.93681	0.795253	-1.73206	Sensitive
										bosutinib	IC50	DFNA5	-8.17959	0.0128337	-1.26585	0.104595	-1.37044	Sensitive
										bosutinib	IC50	DCAM	-5.11118	0.0421789	-1.93106	-0.224526	-1.70653	Sensitive
										bosutinib	IC50	MUC18	-6.90853	0.0099361	-0.973182	0.999641	-1.97282	Sensitive
										bosutinib	IC50	GBG12	-4.71249	0.0420769	0.0046508	1.08029	-1.07564	Sensitive
										bosutinib	IC50	ISG20	-8.96107	0.00323092	-0.972071	0.391354	-1.36343	Sensitive
										bosutinib	IC50	ASPP2	-10.497	0.00225043	-0.21568	0.78887	-1.00455	Sensitive
										bosutinib	IC50	UCHL1	-6.92863	0.0129443	-1.47493	1.1851	-2.66002	Sensitive
										bosutinib	IC50	ERAL1	3.99952	0.0283476	0.00620868	-1.11931	1.12552	Resistant
										bosutinib	IC50	TUFT1	-3.57019	0.0428013	-0.274199	1.74473	-2.01893	Sensitive
										bosutinib	IC50	CALU	-3.95121	0.0386033	-0.559678	0.616554	-1.17623	Sensitive
										bosutinib	IC50	PTRD1	5.24772	0.0228105	0.337945	-0.907065	1.24501	Resistant
										bosutinib	IC50	BCL7A	3.65832	0.035355	0.619049	-0.753515	1.37256	Resistant
										bosutinib	IC50	S2540	-3.90762	0.0307945	-0.348585	0.684045	-1.03263	Sensitive
										bosutinib	IC50	MSI1H	3.59848	0.0391605	0.163721	-1.08581	1.24953	Resistant
										bosutinib	IC50	UBL3	-4.13919	0.0438456	-0.0551187	1.05431	-1.10943	Sensitive
										bosutinib	IC50	PPID	7.12793	0.00716656	-0.172363	-1.56553	1.39317	Resistant
										bosutinib	LN_EC50	BMP1	3.43093	0.0207123	0.24005	-0.789798	1.02985	Resistant
										bosutinib	LN_EC50	SCND1	7.34372	0.00840071	1.03423	-0.204894	1.23913	Resistant
										bosutinib	LN_EC50	LRC8C	3.65839	0.0121419	0.123664	-1.06945	1.19311	Resistant
										bosutinib	LN_EC50	PIGB	-4.66912	0.0234758	-0.657897	0.449329	-1.10723	Sensitive
										bosutinib	LN_EC50	IGSF3	-3.166	0.0134498	-0.0535344	1.1908	-1.24433	Sensitive
										bosutinib	LN_EC50	AKT3	5.16341	0.00168955	0.0162267	-1.39414	1.41037	Resistant
										bosutinib	LN_EC50	S12A7	-3.48999	0.0116901	-0.134874	0.885059	-1.01993	Sensitive
										bosutinib	LN_EC50	GLYC	-3.75087	0.0113104	-0.136947	0.878069	-1.01502	Sensitive
										bosutinib	LN_EC50	LIPB2	3.45431	0.0399168	0.645993	-1.26543	1.91142	Resistant
										bosutinib	LN_EC50	MSLN	2.54099	0.0346579	0.118532	-0.993131	1.11166	Resistant
										bosutinib	LN_EC50	AP2A	2.5933	0.0328046	1.40404	0.315566	1.08847	Resistant
										bosutinib	LN_EC50	HIP1	-3.08313	0.0329909	-0.324047	0.718112	-1.04216	Sensitive
										bosutinib	LN_EC50	L2GL2	-2.47747	0.0383544	0.437583	1.51311	-1.07553	Sensitive
										bosutinib	LN_EC50	DHB2	2.83577	0.0323395	1.18112	-0.784264	1.96538	Resistant
										bosutinib	LN_EC50	NAV1	2.98061	0.021003	0.821427	-0.880322	1.70175	Resistant
										bosutinib	LN_EC50	COTL1	2.89263	0.0203349	0.347029	-0.86619	1.21322	Resistant
										bosutinib	LN_EC50	PLOD2	-2.38773	0.0451855	-0.273239	1.3275	-1.60073	Sensitive
										bosutinib	LN_EC50	H0YDG6	3.62292	0.0235107	0.0128166	-1.25017	1.26298	Resistant
										bosutinib	LN_EC50	ABLM2	2.68234	0.0497535	0.428321	-0.667947	1.09627	Resistant
										bosutinib	LN_EC50	CREL1	-3.03552	0.0251209	0.053932	1.12413	-1.0702	Sensitive
										bosutinib	LN_EC50	STING	3.34247	0.0127853	0.872964	-1.32817	2.20113	Resistant
										bosutinib	LN_EC50	ERBB3	-2.56797	0.0426689	0.194442	1.52346	-1.32902	Sensitive
										bosutinib	LN_EC50	BGLR	-7.89033	0.000366141	-0.633108	1.01173	-1.64483	Sensitive
										bosutinib	LN_EC50	MCP	4.63875	0.0284944	0.460676	-1.08756	1.54823	Resistant
										bosutinib	LN_EC50	RAB6B	-2.97025	0.0495868	-0.419661	1.07534	-1.495	Sensitive
										bosutinib	LN_EC50	PPDPF	-5.10204	0.0146129	-0.0815694	1.81842	-1.89999	Sensitive
										bosutinib	LN_EC50	CY561	-3.33558	0.0125086	0.793734	2.23338	-1.43965	Sensitive
										bosutinib	LN_EC50	CHDH	-2.48841	0.0381594	0.120732	1.29622	-1.17549	Sensitive
										bosutinib	LN_EC50	TAXB1	4.04025	0.00586274	0.531224	-0.490194	1.02142	Resistant
										bosutinib	LN_EC50	HNRPU	-3.16223	0.0313785	0.174716	2.09569	-1.92097	Sensitive
										bosutinib	LN_EC50	PXDN	-2.50486	0.0445557	0.164547	1.69737	-1.53282	Sensitive
										bosutinib	LN_EC50	ST17B	3.17402	0.0355465	0.745855	-0.605438	1.35129	Resistant
										bosutinib	LN_EC50	NCOA7	3.08027	0.0154004	0.237297	-0.78646	1.02376	Resistant
										bosutinib	LN_EC50	ADPRH	-3.57825	0.0226188	-0.270117	1.22478	-1.4949	Sensitive
										bosutinib	LN_EC50	UNC5B	4.50744	0.00718742	0.323696	-0.752418	1.07611	Resistant
										bosutinib	LN_EC50	ALAT2	3.07153	0.0185827	0.357416	-1.23613	1.59355	Resistant
										bosutinib	LN_EC50	PVRL1	2.84659	0.0220093	0.376121	-0.713786	1.08991	Resistant
										bosutinib	LN_EC50	LYAG	-3.13076	0.0144584	-0.0318548	1.14289	-1.17474	Sensitive
										bosutinib	LN_EC50	PP2AB	3.36546	0.0123911	0.464406	-0.622485	1.08689	Resistant
										bosutinib	LN_EC50	CBPQ	-2.55709	0.0442112	-0.682226	2.10085	-2.78307	Sensitive
										bosutinib	LN_EC50	IDHP	-3.08425	0.024737	0.234688	1.58426	-1.34957	Sensitive
										bosutinib	LN_EC50	MBOA5	2.55424	0.0411378	0.582124	-0.657946	1.24007	Resistant
										bosutinib	LN_EC50	GFPT2	-3.0496	0.03279	-0.249523	1.37334	-1.62286	Sensitive
										bosutinib	LN_EC50	SERC	3.54399	0.0100771	-0.00947058	-1.6695	1.66003	Resistant
										bosutinib	LN_EC50	CD2A1	4.1493	0.00863116	1.79452	-1.0548	2.84932	Resistant
										bosutinib	LN_EC50	PXMP4	-2.49223	0.0450278	-0.162662	1.59597	-1.75863	Sensitive
										bosutinib	LN_EC50	SPTA1	-4.54612	0.0230655	0.00518334	1.09077	-1.08558	Sensitive
										bosutinib	LN_EC50	SEM3C	-2.74202	0.0262899	0.0710824	1.70706	-1.63597	Sensitive
										bosutinib	LN_EC50	SH3K1	3.26337	0.0203102	-0.279095	-1.48129	1.2022	Resistant
										bosutinib	LN_EC50	DCLK3	7.94005	0.0322905	0.347305	-0.729148	1.07645	Resistant
										bosutinib	LN_EC50	GDIR2	4.1551	0.0032637	1.59082	-1.54075	3.13157	Resistant
										bosutinib	LN_EC50	GLU2B	5.90091	0.00128937	0.258484	-1.89506	2.15354	Resistant
										bosutinib	LN_EC50	GREB1	-15.1956	0.0109154	-0.448425	3.90385	-4.35228	Sensitive
										bosutinib	LN_EC50	DDB2	-3.77151	0.00750081	-0.377024	0.82622	-1.20324	Sensitive
										bosutinib	LN_EC50	GLCNE	3.36906	0.0174413	0.283279	-1.07976	1.36304	Resistant
										bosutinib	LN_EC50	SNRK	6.73653	0.00649239	0.135522	-1.06596	1.20148	Resistant
										bosutinib	LN_EC50	IQGA2	2.44384	0.0498527	0.301978	-1.04391	1.34588	Resistant
										bosutinib	LN_EC50	RNF12	17.0926	0.011944	0.543554	-0.700588	1.24414	Resistant
										bosutinib	LN_EC50	ODC	-4.47262	0.0413692	-0.686754	1.1819	-1.86865	Sensitive
										bosutinib	LN_EC50	THEM4	-2.84608	0.0254416	-1.34522	-0.0580101	-1.28721	Sensitive
										bosutinib	LN_EC50	GDAP1	-4.46545	0.00325311	-0.43	0.851299	-1.2813	Sensitive
										bosutinib	LN_EC50	FIZ1	3.91547	0.0177514	0.679964	-0.374899	1.05486	Resistant
										bosutinib	LN_EC50	F122B	3.8507	0.0183667	0.58597	-0.538246	1.12422	Resistant
										bosutinib	LN_EC50	WLS	3.48615	0.0124609	0.632134	-0.879703	1.51184	Resistant
										bosutinib	LN_EC50	CLD3	-3.07447	0.0257722	0.341671	2.1809	-1.83923	Sensitive
										bosutinib	LN_EC50	CGRE1	-2.49697	0.0499126	-0.804373	1.23774	-2.04211	Sensitive
										bosutinib	LN_EC50	EPHX4	6.19074	0.00188867	-0.355348	-1.52335	1.168	Resistant
										bosutinib	LN_EC50	TGBR3	27.4117	0.000159839	1.66262	-1.31089	2.97351	Resistant
										bosutinib	LN_EC50	MLF2	4.65872	0.00162615	0.246163	-0.770975	1.01714	Resistant
										bosutinib	LN_EC50	PRPS1	2.50034	0.0382588	0.13827	-0.887809	1.02608	Resistant
										bosutinib	LN_EC50	T126B	-3.86691	0.0175404	-0.150306	0.948895	-1.0992	Sensitive
										bosutinib	LN_EC50	ASM3A	-2.83742	0.0219226	-1.42808	-0.0705052	-1.35757	Sensitive
										bosutinib	LN_EC50	TNR1A	4.61603	0.0209969	0.550667	-0.828312	1.37898	Resistant
										bosutinib	LN_EC50	SFXN5	-6.17612	0.00381617	-1.20396	-0.0838276	-1.12013	Sensitive
										bosutinib	LN_EC50	FABPH	2.6548	0.0376917	0.338541	-1.71744	2.05598	Resistant
										bosutinib	LN_EC50	I27L2	-5.20453	0.0349507	-1.53938	1.35492	-2.89431	Sensitive
										bosutinib	LN_EC50	R3HD4	11.0797	0.00154528	0.46408	-0.943156	1.40724	Resistant
										bosutinib	LN_EC50	S10A6	3.13298	0.0191744	0.0234925	-1.07967	1.10316	Resistant
										bosutinib	LN_EC50	SPRR3	5.07287	0.0148595	2.15787	-1.49394	3.65181	Resistant
										bosutinib	LN_EC50	BI1	-3.13488	0.0142269	-0.477731	0.972135	-1.44987	Sensitive
										bosutinib	LN_IC50	TFR2	-4.75082	0.0177037	-0.436432	0.896806	-1.33324	Sensitive
										bosutinib	LN_IC50	K1161	3.4163	0.0421807	0.922145	-0.225308	1.14745	Resistant
										bosutinib	LN_IC50	TPM4	-8.66707	0.0126016	-0.654439	0.841642	-1.49608	Sensitive
										bosutinib	LN_IC50	WFS1	-6.07509	0.0257037	-0.135428	1.20962	-1.34505	Sensitive
										bosutinib	LN_IC50	MTSSL	-18.5973	0.0192116	-0.312019	0.908697	-1.22072	Sensitive
										bosutinib	LN_IC50	NDUV3	20.1629	0.0153514	-0.218989	-1.57831	1.35932	Resistant
										bosutinib	LN_IC50	PI51A	-5.59672	0.0115692	-0.707975	0.657957	-1.36593	Sensitive
										bosutinib	LN_IC50	ALDOC	-5.75525	0.0201506	-1.2711	0.597053	-1.86815	Sensitive
										bosutinib	LN_IC50	TENS3	-4.18725	0.0378179	-0.277791	1.04797	-1.32576	Sensitive
										bosutinib	LN_IC50	HNRPC	6.86621	0.00685897	0.412267	-0.63574	1.04801	Resistant
										bosutinib	LN_IC50	LRIG2	7.15706	0.0327053	1.36936	-0.0889869	1.45834	Resistant
										bosutinib	LN_IC50	DYST	-4.18534	0.0267235	-0.714439	0.302256	-1.01669	Sensitive
										bosutinib	LN_IC50	PTTG	-3.75871	0.034402	0.301517	1.45802	-1.15651	Sensitive
										bosutinib	LN_IC50	SACS	-5.02841	0.0292743	-0.358377	0.691711	-1.05009	Sensitive
										bosutinib	LN_IC50	CA2D1	-4.45194	0.024704	-0.913186	0.743351	-1.65654	Sensitive
										bosutinib	LN_IC50	RRAS	-3.3546	0.0494538	-0.398108	0.715531	-1.11364	Sensitive
										bosutinib	LN_IC50	TAF9B	4.71829	0.0198561	0.785794	-0.704588	1.49038	Resistant
										bosutinib	LN_IC50	CPNE7	-5.68582	0.0139932	-0.494477	0.772784	-1.26726	Sensitive
										bosutinib	LN_IC50	DAB2	-13.7319	0.000846961	-0.690451	1.55742	-2.24787	Sensitive
										bosutinib	LN_IC50	TFB1M	3.8275	0.0347917	-0.105065	-1.30988	1.20482	Resistant
										bosutinib	LN_IC50	FKBP5	5.37219	0.0306691	0.368991	-1.54992	1.91891	Resistant
										bosutinib	LN_IC50	ALDR	-13.0238	0.00419846	-0.890085	0.60774	-1.49782	Sensitive
										bosutinib	LN_IC50	RHEB	-6.67597	0.0347212	-0.324668	0.790223	-1.11489	Sensitive
										bosutinib	LN_IC50	GFPT2	-6.70715	0.0254793	-0.93681	0.795253	-1.73206	Sensitive
										bosutinib	LN_IC50	DFNA5	-8.17959	0.0128337	-1.26585	0.104595	-1.37044	Sensitive
										bosutinib	LN_IC50	DCAM	-5.11118	0.0421789	-1.93106	-0.224526	-1.70653	Sensitive
										bosutinib	LN_IC50	MUC18	-6.90853	0.0099361	-0.973182	0.999641	-1.97282	Sensitive
										bosutinib	LN_IC50	GBG12	-4.71249	0.0420769	0.0046508	1.08029	-1.07564	Sensitive
										bosutinib	LN_IC50	ISG20	-8.96107	0.00323092	-0.972071	0.391354	-1.36343	Sensitive
										bosutinib	LN_IC50	ASPP2	-10.497	0.00225043	-0.21568	0.78887	-1.00455	Sensitive
										bosutinib	LN_IC50	UCHL1	-6.92863	0.0129443	-1.47493	1.1851	-2.66002	Sensitive
										bosutinib	LN_IC50	ERAL1	3.99952	0.0283476	0.00620868	-1.11931	1.12552	Resistant
										bosutinib	LN_IC50	TUFT1	-3.57019	0.0428013	-0.274199	1.74473	-2.01893	Sensitive
										bosutinib	LN_IC50	CALU	-3.95121	0.0386033	-0.559678	0.616554	-1.17623	Sensitive
										bosutinib	LN_IC50	PTRD1	5.24772	0.0228105	0.337945	-0.907065	1.24501	Resistant
										bosutinib	LN_IC50	BCL7A	3.65832	0.035355	0.619049	-0.753515	1.37256	Resistant
										bosutinib	LN_IC50	S2540	-3.90762	0.0307945	-0.348585	0.684045	-1.03263	Sensitive
										bosutinib	LN_IC50	MSI1H	3.59848	0.0391605	0.163721	-1.08581	1.24953	Resistant
										bosutinib	LN_IC50	UBL3	-4.13919	0.0438456	-0.0551187	1.05431	-1.10943	Sensitive
										bosutinib	LN_IC50	PPID	7.12793	0.00716656	-0.172363	-1.56553	1.39317	Resistant

## Sheet: dasatinib
dasatinib mRNA and protein concordant sensitivity results			The drug sensitivity results for dasatinib in mRNA level.										The drug sensitivity results for dasatinib in protein level.
Gene	Concordant_Category		drugName	measure	Gene	t.statistic	p.value	mean(Resistant)	mean(Sensitive)	FC(R/S)	Category		drugName	measure	Gene	t.statistic	p.value	mean(Resistant)	mean(Sensitive)	FC(R-S)	Category
ACHE	Resistant		dasatinib	EC50	SARM1	4.85087	0.00447284	2.92162	1.06931	2.73225	Resistant		dasatinib	EC50	MMP14	-2.53789	0.0235563	-1.15593	0.265753	-1.42169	Sensitive
AP3B2	Resistant		dasatinib	EC50	ABCC8	4.34539	0.00468742	1.24014	0.266562	4.65235	Resistant		dasatinib	EC50	MICA2	-2.45487	0.0240529	-0.885864	0.126581	-1.01245	Sensitive
CLRN3	Resistant		dasatinib	EC50	ADAM22	3.50037	0.00723984	2.04328	0.880708	2.32004	Resistant		dasatinib	EC50	IBP7	-2.35115	0.0303407	-1.01239	0.502468	-1.51486	Sensitive
GDAP1	Resistant		dasatinib	EC50	BTK	3.81613	0.0156722	0.162499	0.0565173	2.87522	Resistant		dasatinib	EC50	EFHD1	2.76242	0.0152409	3.29848	1.49801	1.80047	Resistant
LOXL1	Resistant		dasatinib	EC50	MAMLD1	2.82894	0.0393225	2.96743	0.433856	6.83965	Resistant		dasatinib	EC50	ANK1	-4.23555	0.000451385	-1.0501	0.28131	-1.33141	Sensitive
MTMR6	Resistant		dasatinib	EC50	IL20RA	-3.15353	0.0206779	0.670261	3.23058	0.207474	Sensitive		dasatinib	EC50	GOGA4	2.93384	0.0166481	1.12919	-0.124158	1.25334	Resistant
PLCB1	Resistant		dasatinib	EC50	CNTN1	-3.03213	0.0157346	0.72392	2.26416	0.319729	Sensitive		dasatinib	EC50	MYH7B	-7.15687	0.0189696	-0.738453	0.44864	-1.18709	Sensitive
RAB6B	Resistant		dasatinib	EC50	SYT13	4.82546	0.00130173	0.928568	0.226579	4.09822	Resistant		dasatinib	EC50	FA89A	-2.30935	0.0367045	-1.00771	0.0498571	-1.05757	Sensitive
TIGAR	Resistant		dasatinib	EC50	CDH10	-2.74647	0.0404534	0.05889	2.96513	0.0198609	Sensitive		dasatinib	EC50	EFNB1	-2.67527	0.014585	-0.944137	0.149086	-1.09322	Sensitive
CNTN1	Sensitive		dasatinib	EC50	ADRB1	-2.38852	0.0413927	0.24455	0.81222	0.301088	Sensitive		dasatinib	EC50	CTND1	-2.10649	0.0486962	-0.0876369	0.944689	-1.03233	Sensitive
DHRS3	Sensitive		dasatinib	EC50	SCML1	2.59901	0.0288513	3.04192	1.48332	2.05075	Resistant		dasatinib	EC50	RBY1B	-3.83257	0.0155612	-1.87585	0.447933	-2.32379	Sensitive
ERN2	Sensitive		dasatinib	EC50	CHRDL2	4.18297	0.00252722	0.132018	0.0421279	3.13375	Resistant		dasatinib	EC50	FRAS1	-3.34969	0.00439689	-1.18581	0.470525	-1.65634	Sensitive
GATA6	Sensitive		dasatinib	EC50	PHF21B	2.71693	0.0304775	1.07988	0.356229	3.03142	Resistant		dasatinib	EC50	LRC8C	-3.25144	0.00554589	-0.762535	0.31807	-1.08061	Sensitive
LRP1B	Sensitive		dasatinib	EC50	TBXAS1	2.79716	0.0334777	1.95445	0.566564	3.44965	Resistant		dasatinib	EC50	MARCS	-2.394	0.0341836	-1.41962	0.407197	-1.82681	Sensitive
TDRP	Sensitive		dasatinib	EC50	WNT8A	2.52712	0.0476105	0.0340611	0.00476152	7.1534	Resistant		dasatinib	EC50	SSFA2	-4.83914	0.000129093	-0.764579	0.460636	-1.22522	Sensitive
			dasatinib	EC50	DGAT2	3.51294	0.0134548	3.89187	1.85909	2.09343	Resistant		dasatinib	EC50	FMNL2	-2.61874	0.0216664	-0.81425	0.424113	-1.23836	Sensitive
			dasatinib	EC50	HIPK2	3.50046	0.0159813	4.14276	1.92786	2.14889	Resistant		dasatinib	EC50	AGRIN	-3.71658	0.00135317	-0.197679	0.813087	-1.01077	Sensitive
			dasatinib	EC50	PDZD4	4.10706	0.0143047	2.3362	0.245479	9.51691	Resistant		dasatinib	EC50	CN159	-2.37438	0.0308224	-0.445513	0.747151	-1.19266	Sensitive
			dasatinib	EC50	TGFBR3	-2.60952	0.0322027	0.450005	1.76742	0.25461	Sensitive		dasatinib	EC50	UAP1L	2.46693	0.024477	1.09783	-0.263217	1.36105	Resistant
			dasatinib	EC50	HES2	-2.49767	0.036025	1.09837	2.65756	0.413301	Sensitive		dasatinib	EC50	TAGL2	3.60892	0.00168007	0.800515	-0.251386	1.0519	Resistant
			dasatinib	EC50	FGF22	-3.26692	0.013537	0.149459	0.363485	0.411183	Sensitive		dasatinib	EC50	TNAP2	-2.33309	0.0307053	0.0854143	1.09684	-1.01142	Sensitive
			dasatinib	EC50	EPHA8	2.9813	0.0232282	0.172322	0.0629644	2.73682	Resistant		dasatinib	EC50	LAMB3	-2.86175	0.0110064	-0.925055	0.823593	-1.74865	Sensitive
			dasatinib	EC50	VASH1	3.74811	0.0069446	1.84678	0.503785	3.6658	Resistant		dasatinib	EC50	ZN131	-2.79489	0.0189673	-0.691241	0.309774	-1.00102	Sensitive
			dasatinib	EC50	ASIC4	4.41221	0.00804788	0.195243	0.0494801	3.94588	Resistant		dasatinib	EC50	T22D3	2.3451	0.043589	1.66019	-0.173788	1.83398	Resistant
			dasatinib	EC50	CDHR2	3.19097	0.0127981	0.622857	0.250263	2.48881	Resistant		dasatinib	EC50	ACSS3	-2.72891	0.0187251	-0.821257	1.11259	-1.93385	Sensitive
			dasatinib	EC50	CAPN6	4.21462	0.00225759	0.254639	0.0708298	3.59508	Resistant		dasatinib	EC50	MOT1	-2.15114	0.0468892	-1.54695	-0.228743	-1.31821	Sensitive
			dasatinib	EC50	LXN	2.47607	0.0426403	5.8913	2.8675	2.05451	Resistant		dasatinib	EC50	VPP4	2.82752	0.0476047	3.66579	0.213965	3.45182	Resistant
			dasatinib	EC50	RAPGEF3	-4.25413	0.00526112	0.988899	3.98522	0.248142	Sensitive		dasatinib	EC50	SPS2L	-3.15825	0.00651585	-1.31924	0.0303374	-1.34958	Sensitive
			dasatinib	EC50	PTPRH	-2.33089	0.0461982	0.514408	1.63704	0.31423	Sensitive		dasatinib	EC50	NBEA	2.95448	0.0119107	1.03426	0.030365	1.00389	Resistant
			dasatinib	EC50	DNAAF6	-3.34247	0.0135716	0.00571383	0.0562461	0.101586	Sensitive		dasatinib	EC50	LG3BP	-2.40234	0.0259601	-0.884292	0.667286	-1.55158	Sensitive
			dasatinib	EC50	KCNN2	3.62747	0.00619563	0.12665	0.0539746	2.34648	Resistant		dasatinib	EC50	TAU	4.51035	0.00105616	1.84519	-0.755108	2.6003	Resistant
			dasatinib	EC50	CDH7	-2.7622	0.0374604	0.107927	0.400506	0.269478	Sensitive		dasatinib	EC50	TAU	2.31443	0.0487052	3.16888	-0.209712	3.37859	Resistant
			dasatinib	EC50	PCDHGA2	3.00106	0.0394059	1.86953	0.15642	11.952	Resistant		dasatinib	EC50	TAU	4.92527	0.00131516	3.00109	-1.16865	4.16974	Resistant
			dasatinib	EC50	KCNK2	3.92246	0.0167427	3.95644	0.153098	25.8426	Resistant		dasatinib	EC50	AL3B1	-2.36619	0.0290972	-0.54273	0.61487	-1.1576	Sensitive
			dasatinib	EC50	GCKR	-3.04876	0.0284645	0	0.129931	0	Sensitive		dasatinib	EC50	ITA3	-2.49714	0.0214542	-0.544536	0.705077	-1.24961	Sensitive
			dasatinib	EC50	ERO1B	-3.1618	0.0235199	0.538242	1.88212	0.285977	Sensitive		dasatinib	EC50	H14	-2.75723	0.0225697	-0.523626	0.679981	-1.20361	Sensitive
			dasatinib	EC50	HSD17B2	-3.00963	0.0286999	0.113766	1.18817	0.0957486	Sensitive		dasatinib	EC50	PPR3D	2.33027	0.0439235	0.90328	-0.117696	1.02098	Resistant
			dasatinib	EC50	PHACTR3	-4.28824	0.0020848	0.53915	1.51885	0.354973	Sensitive		dasatinib	EC50	E9PDZ8	-5.17792	0.00320489	-1.34564	0.445771	-1.79141	Sensitive
			dasatinib	EC50	GP6	-2.92198	0.0272222	0.0711416	0.456755	0.155754	Sensitive		dasatinib	EC50	GNPI2	2.47434	0.0244471	0.76915	-0.335642	1.10479	Resistant
			dasatinib	EC50	RPGRIP1	-2.73633	0.0263949	0.194086	0.662761	0.292844	Sensitive		dasatinib	EC50	HMGN5	2.15145	0.044065	0.390781	-0.658419	1.0492	Resistant
			dasatinib	EC50	SEMA6A	3.52323	0.00653554	1.55811	0.672801	2.31586	Resistant		dasatinib	EC50	FLNB	-2.37496	0.0411409	-0.348625	2.25141	-2.60004	Sensitive
			dasatinib	EC50	KRT31	-2.78828	0.0369283	0.00574212	0.0761551	0.0754003	Sensitive		dasatinib	EC50	GNAI1	-2.64144	0.0178826	-0.646208	0.365281	-1.01149	Sensitive
			dasatinib	EC50	PDE6C	-2.59135	0.0349277	0.0674188	0.140753	0.478985	Sensitive		dasatinib	EC50	MATN2	-4.31708	0.000993871	-0.584178	0.89436	-1.47854	Sensitive
			dasatinib	EC50	PRODH	-3.00722	0.0149445	1.5595	4.32354	0.360699	Sensitive		dasatinib	EC50	PA1B3	2.79777	0.0133863	1.03667	-0.168816	1.20549	Resistant
			dasatinib	EC50	GGTLC2	-2.6531	0.0452574	0	0.0603039	0	Sensitive		dasatinib	EC50	PDLI1	-3.67935	0.00155392	-1.06333	0.442865	-1.50619	Sensitive
			dasatinib	EC50	GALNT16	2.34352	0.049357	1.22347	0.553843	2.20905	Resistant		dasatinib	EC50	LRP5	-3.34184	0.00346183	-0.550049	0.493231	-1.04328	Sensitive
			dasatinib	EC50	BDKRB1	-2.60116	0.0415456	0.620605	1.62105	0.382842	Sensitive		dasatinib	EC50	RASL1	-3.46686	0.00717122	-1.20776	0.540468	-1.74822	Sensitive
			dasatinib	EC50	CPNE6	-3.88106	0.00473608	0.0113167	0.0969791	0.116692	Sensitive		dasatinib	EC50	SPTN1	-2.69852	0.018264	-0.891051	0.153065	-1.04412	Sensitive
			dasatinib	EC50	NFATC2	3.1891	0.0128367	2.41184	0.74309	3.24569	Resistant		dasatinib	EC50	DNHD1	2.70859	0.0314959	0.322341	-1.0509	1.37324	Resistant
			dasatinib	EC50	RIMS4	4.77127	0.00483848	2.40348	0.523298	4.59294	Resistant		dasatinib	EC50	PKP2	-3.04584	0.00651695	-0.570023	0.949367	-1.51939	Sensitive
			dasatinib	EC50	PTK6	-3.18919	0.0219483	1.25315	3.4926	0.358802	Sensitive		dasatinib	EC50	NHRF1	2.30971	0.0444228	1.632	0.116007	1.516	Resistant
			dasatinib	EC50	SPEF1	-2.65281	0.0421827	0.390393	0.83067	0.469973	Sensitive		dasatinib	EC50	OLFL3	4.10147	0.0142605	4.07004	0.467092	3.60295	Resistant
			dasatinib	EC50	PAGE4	-2.28512	0.0488811	0.0497312	0.165018	0.301368	Sensitive		dasatinib	EC50	MSLN	-3.48078	0.00367349	-1.12901	1.12026	-2.24927	Sensitive
			dasatinib	EC50	SCML2	5.4238	0.00103033	2.36184	0.706331	3.34381	Resistant		dasatinib	EC50	CTR2	2.5557	0.0300746	0.0653198	-1.13952	1.20484	Resistant
			dasatinib	EC50	PCSK1N	3.28112	0.009576	4.77189	1.77411	2.68974	Resistant		dasatinib	EC50	FRIL	-3.48365	0.00273308	-1.22609	0.290964	-1.51706	Sensitive
			dasatinib	EC50	CCL22	-6.05527	0.000290472	0.13058	0.666983	0.195776	Sensitive		dasatinib	EC50	MK12	2.51297	0.0264687	0.718101	-0.463493	1.18159	Resistant
			dasatinib	EC50	CCL17	-3.60996	0.00601111	0.0824301	0.292866	0.28146	Sensitive		dasatinib	EC50	IFIT3	-2.65303	0.0159917	-0.489754	1.19984	-1.68959	Sensitive
			dasatinib	EC50	FA2H	-3.1266	0.0134484	1.16293	2.74238	0.42406	Sensitive		dasatinib	EC50	TTYH3	-2.63002	0.0177228	-0.502497	0.608475	-1.11097	Sensitive
			dasatinib	EC50	WFDC1	2.66477	0.0470779	0.140877	0.0377477	3.73208	Resistant		dasatinib	EC50	NDK3	2.55905	0.0194985	1.0191	-0.180324	1.19942	Resistant
			dasatinib	EC50	AP3B2	4.19976	0.00941526	2.33634	0.547541	4.26697	Resistant		dasatinib	EC50	SON	-3.13292	0.0330492	-0.973228	0.288518	-1.26175	Sensitive
			dasatinib	EC50	CEMIP	2.83289	0.0201982	1.15444	0.520455	2.21814	Resistant		dasatinib	EC50	Q5VW26	3.65199	0.00291767	0.808553	-0.203319	1.01187	Resistant
			dasatinib	EC50	GDAP1	3.58557	0.0104459	5.00745	2.20289	2.27313	Resistant		dasatinib	EC50	A8MUP8	3.5927	0.0223011	2.52843	0.297449	2.23098	Resistant
			dasatinib	EC50	CLIP3	2.72251	0.0430372	2.85544	0.84882	3.36401	Resistant		dasatinib	EC50	1A25	-3.54972	0.00192041	-0.90113	1.48025	-2.38138	Sensitive
			dasatinib	EC50	SCN1B	4.03337	0.00441326	2.36468	1.03921	2.27546	Resistant		dasatinib	EC50	1A11	-2.22319	0.0441948	-0.760713	0.626547	-1.38726	Sensitive
			dasatinib	EC50	WNT2	-2.4327	0.04002	0.00287106	0.0119627	0.24	Sensitive		dasatinib	EC50	1B45	-2.41972	0.0262311	-0.642278	0.916397	-1.55868	Sensitive
			dasatinib	EC50	HOXA13	-4.43921	0.00163445	0.220976	1.22094	0.180988	Sensitive		dasatinib	EC50	1C17	-2.71076	0.0142841	-0.202408	1.16224	-1.36465	Sensitive
			dasatinib	EC50	CRHR2	-2.39975	0.0414448	0.014271	0.0470872	0.303076	Sensitive		dasatinib	EC50	1C01	-2.09016	0.0497247	-0.299245	1.10769	-1.40694	Sensitive
			dasatinib	EC50	APBA1	4.08022	0.00557648	1.32103	0.370963	3.56108	Resistant		dasatinib	EC50	KPBB	3.61077	0.00391436	0.920214	-0.087709	1.00792	Resistant
			dasatinib	EC50	RUNDC3A	3.08644	0.0174073	1.31712	0.504243	2.61207	Resistant		dasatinib	EC50	SE6L1	-2.82832	0.047443	-0.217727	1.11009	-1.32781	Sensitive
			dasatinib	EC50	P2RX1	-3.01567	0.0295628	0.0143553	0.0355383	0.403939	Sensitive		dasatinib	EC50	FUK	2.52602	0.0307827	0.738272	-0.681757	1.42003	Resistant
			dasatinib	EC50	ASIC2	3.21468	0.032444	0.0171698	0	Inf	Resistant		dasatinib	EC50	ETS2	-2.64076	0.0418781	-2.19127	-0.665124	-1.52614	Sensitive
			dasatinib	EC50	MAPK10	-2.75305	0.0352433	0.691143	2.46268	0.280646	Sensitive		dasatinib	EC50	KI67	-3.21309	0.00485169	-0.641716	0.655926	-1.29764	Sensitive
			dasatinib	EC50	IL2	-3.15353	0.0206779	0.670261	3.23058	0.207474	Sensitive		dasatinib	EC50	BDH2	2.87808	0.0112356	0.548356	-0.499842	1.0482	Resistant
			dasatinib	EC50	DTX4	-3.13624	0.0121947	1.02297	3.30538	0.309488	Sensitive		dasatinib	EC50	COIA1	-2.99767	0.0071879	-0.872543	0.451423	-1.32397	Sensitive
			dasatinib	EC50	APOA5	3.25335	0.0268537	0.0725683	0.00476152	15.2405	Resistant		dasatinib	EC50	PRSR2	-3.5814	0.00178897	-0.191513	0.844682	-1.0362	Sensitive
			dasatinib	EC50	APOC3	3.22766	0.0262227	0.360845	0.0272498	13.2421	Resistant		dasatinib	EC50	HBE	3.24545	0.0065805	0.201304	-1.06193	1.26324	Resistant
			dasatinib	EC50	CD5	1.63299	0.177808	0.00574212	0	Inf	Resistant		dasatinib	EC50	HBG2	21.1486	4.38078e-06	2.65949	-0.718127	3.37761	Resistant
			dasatinib	EC50	POU2AF1	-2.45264	0.0414564	0.065966	0.24401	0.270341	Sensitive		dasatinib	EC50	LCMT2	2.76499	0.0380106	0.632601	-0.491235	1.12384	Resistant
			dasatinib	EC50	TSPAN11	-2.88639	0.0236662	0.202233	0.46021	0.439437	Sensitive		dasatinib	EC50	DDHD2	3.66392	0.00282201	0.690211	-0.31863	1.00884	Resistant
			dasatinib	EC50	PRMT8	-4.34062	0.0018762	0.00287106	0.0214622	0.133773	Sensitive		dasatinib	EC50	SEM3A	-2.52557	0.0397693	-0.925294	0.0864966	-1.01179	Sensitive
			dasatinib	EC50	MGP	3.89381	0.00416744	8.60929	3.0479	2.82467	Resistant		dasatinib	EC50	EPHA2	-2.19295	0.0485517	-1.07268	0.330939	-1.40362	Sensitive
			dasatinib	EC50	ARHGDIB	-5.81818	0.00111712	2.07498	6.74842	0.307476	Sensitive		dasatinib	EC50	TRIM3	2.24662	0.0492444	1.5529	0.257326	1.29558	Resistant
			dasatinib	EC50	AICDA	-3.16228	0.025031	0	0.0469262	0	Sensitive		dasatinib	EC50	EGFR	-2.22794	0.0417695	-0.799501	0.695592	-1.49509	Sensitive
			dasatinib	EC50	UST	2.591	0.0385785	1.81152	0.626721	2.89047	Resistant		dasatinib	EC50	PLEC	-2.75117	0.0119766	-0.46321	0.800081	-1.26329	Sensitive
			dasatinib	EC50	BMP5	3.73295	0.0102743	1.0691	0.240882	4.43826	Resistant		dasatinib	EC50	CO3	-3.34868	0.00304517	-0.383111	0.874781	-1.25789	Sensitive
			dasatinib	EC50	RBM24	4.33964	0.00220963	2.2611	1.06124	2.13062	Resistant		dasatinib	EC50	LMO7	-2.71716	0.0132071	-0.876432	0.287332	-1.16376	Sensitive
			dasatinib	EC50	HDGFL1	-2.60339	0.0480519	0	0.0779627	0	Sensitive		dasatinib	EC50	H0YDG6	-2.66729	0.0226981	-1.53327	0.175138	-1.70841	Sensitive
			dasatinib	EC50	SLC16A10	-3.54528	0.00804315	0.194118	0.725061	0.267727	Sensitive		dasatinib	EC50	GLBL2	-2.68753	0.0201913	-0.491146	0.703996	-1.19514	Sensitive
			dasatinib	EC50	UNC93A	-3.16228	0.025031	0	0.00957019	0	Sensitive		dasatinib	EC50	CP4FB	-2.82588	0.0120154	-1.2702	0.379412	-1.64961	Sensitive
			dasatinib	EC50	SMOC2	3.41799	0.00774754	1.82058	0.463403	3.92872	Resistant		dasatinib	EC50	ARK73	2.56034	0.0338012	0.857626	-0.998082	1.85571	Resistant
			dasatinib	EC50	TENT5A	3.93744	0.00461316	4.03118	1.91351	2.1067	Resistant		dasatinib	EC50	MP2K6	2.48689	0.0245289	0.353296	-0.787382	1.14068	Resistant
			dasatinib	EC50	PCDHB2	2.84338	0.0227905	4.04963	1.43773	2.81669	Resistant		dasatinib	EC50	ITB4	-2.75619	0.0119163	-0.492037	1.14149	-1.63352	Sensitive
			dasatinib	EC50	NME5	3.13998	0.0348485	0.746842	0	Inf	Resistant		dasatinib	EC50	PTTG	-3.41028	0.00303499	-0.59633	0.762668	-1.359	Sensitive
			dasatinib	EC50	PCDHB3	4.10656	0.00984421	3.7536	0.372066	10.0885	Resistant		dasatinib	EC50	FA83G	-2.99917	0.0101378	-0.0961124	0.906605	-1.00272	Sensitive
			dasatinib	EC50	BTNL8	4	0.0161301	0.0114842	0	Inf	Resistant		dasatinib	EC50	LAMC1	-3.12392	0.00635925	-0.595326	0.431563	-1.02689	Sensitive
			dasatinib	EC50	SLC27A6	3.18754	0.0282428	1.14593	0.192042	5.96709	Resistant		dasatinib	EC50	LAMC2	-2.68624	0.0142394	-0.835898	0.654919	-1.49082	Sensitive
			dasatinib	EC50	CDX1	-3.04249	0.0158632	0.00574212	0.0261535	0.219554	Sensitive		dasatinib	EC50	PI4KB	3.35352	0.00399904	0.811805	-0.256703	1.06851	Resistant
			dasatinib	EC50	HRH2	3.34567	0.0262699	0.184272	0.0472223	3.90222	Resistant		dasatinib	EC50	WNT5A	-2.68914	0.0291648	-1.19221	0.113734	-1.30594	Sensitive
			dasatinib	EC50	LOXL3	3.06403	0.015985	2.37511	1.01951	2.32965	Resistant		dasatinib	EC50	DGKQ	2.75946	0.0165975	0.614521	-0.423992	1.03851	Resistant
			dasatinib	EC50	WIPF1	5.98427	0.000779972	4.34979	0.836441	5.20036	Resistant		dasatinib	EC50	GRAM3	-5.093	0.000365662	0.0129752	1.63574	-1.62276	Sensitive
			dasatinib	EC50	NR5A2	-2.42398	0.0400406	0.281411	1.05183	0.267543	Sensitive		dasatinib	EC50	2023-09-05	2.33688	0.0441856	1.23952	-0.137612	1.37713	Resistant
			dasatinib	EC50	SIPA1L2	4.48319	0.00225081	4.64106	1.69276	2.74171	Resistant		dasatinib	EC50	2023-09-03	3.29081	0.00488847	1.70879	0.105869	1.60292	Resistant
			dasatinib	EC50	SLAMF1	-3.3476	0.0203822	0	0.0307777	0	Sensitive		dasatinib	EC50	TFPI1	-2.3196	0.0447988	-2.65163	-0.669941	-1.98169	Sensitive
			dasatinib	EC50	SLC5A9	2.89392	0.0265255	0.0535822	0.0118925	4.50555	Resistant		dasatinib	EC50	IFIT2	-2.46951	0.0359763	-0.715176	1.14944	-1.86462	Sensitive
			dasatinib	EC50	APOA1	3.85037	0.00624144	0.512753	0.239926	2.13713	Resistant		dasatinib	EC50	IFIT1	-2.77238	0.0140633	-0.801085	1.20595	-2.00703	Sensitive
			dasatinib	EC50	SLC8A2	-3.0368	0.0271736	0.141094	0.825408	0.170938	Sensitive		dasatinib	EC50	ACLY	3.15428	0.00559137	0.595936	-0.426767	1.0227	Resistant
			dasatinib	EC50	CFAP94	-2.6115	0.0440082	0.226474	0.775614	0.291993	Sensitive		dasatinib	EC50	SPB9	-3.09303	0.00736924	-1.31317	0.5558	-1.86897	Sensitive
			dasatinib	EC50	NKX2.3	-3.09124	0.0263515	0.050472	0.641052	0.078733	Sensitive		dasatinib	EC50	ACOX3	2.75646	0.0212996	1.39043	0.315619	1.07481	Resistant
			dasatinib	EC50	HOXB1	-3.06941	0.0278024	0	0.277076	0	Sensitive		dasatinib	EC50	PHLB2	-2.98079	0.00906187	-0.702208	0.654237	-1.35644	Sensitive
			dasatinib	EC50	GRIA2	2.75877	0.0322508	0.0969351	0.0283389	3.42057	Resistant		dasatinib	EC50	SP100	-2.82937	0.0106877	-0.803465	0.333195	-1.13666	Sensitive
			dasatinib	EC50	TP53AIP1	-4.20641	0.00829368	0.0894063	0.635455	0.140697	Sensitive		dasatinib	EC50	SP140	-2.73948	0.0213175	-1.29022	0.364028	-1.65424	Sensitive
			dasatinib	EC50	GHSR	4.52518	0.0031647	0.0509273	0.00715407	7.11864	Resistant		dasatinib	EC50	HMGB3	3.02154	0.00654519	0.733565	-0.392395	1.12596	Resistant
			dasatinib	EC50	TNFSF10	-4.58787	0.00435921	1.56729	5.31834	0.294694	Sensitive		dasatinib	EC50	PTK7	-2.43981	0.0304738	-0.101571	0.95599	-1.05756	Sensitive
			dasatinib	EC50	SASH3	-2.42045	0.0396843	0.0475732	0.138099	0.344485	Sensitive		dasatinib	EC50	BROX	2.63052	0.0259073	1.12656	-0.0326041	1.15916	Resistant
			dasatinib	EC50	NECAB1	2.72175	0.0484813	2.15358	0.304928	7.06258	Resistant		dasatinib	EC50	E41L1	-2.34998	0.0286341	-0.159545	0.845504	-1.00505	Sensitive
			dasatinib	EC50	RAB9B	4.41029	0.00720392	0.706121	0.165067	4.2778	Resistant		dasatinib	EC50	PCGF5	-2.63759	0.0233021	-1.34801	0.214886	-1.5629	Sensitive
			dasatinib	EC50	KCNK15	3.33523	0.0267217	2.70289	0.180721	14.9561	Resistant		dasatinib	EC50	APLP2	-3.79528	0.00142879	-0.419475	0.717208	-1.13668	Sensitive
			dasatinib	EC50	RUNX2	2.29531	0.0475513	2.98287	1.40044	2.12995	Resistant		dasatinib	EC50	A6NF51	3.32684	0.00655213	1.023	-0.317042	1.34004	Resistant
			dasatinib	EC50	SH3TC1	-5.94003	0.000221584	0.54432	1.96273	0.277328	Sensitive		dasatinib	EC50	B4DPS5	2.88466	0.0136335	0.778675	-0.356038	1.13471	Resistant
			dasatinib	EC50	SRMS	-2.71525	0.0393444	0.342157	1.73285	0.197454	Sensitive		dasatinib	EC50	TRFM	-3.19075	0.00467332	-1.13746	0.38696	-1.52442	Sensitive
			dasatinib	EC50	NPBWR2	-3.01582	0.0295575	0	0.0213924	0	Sensitive		dasatinib	EC50	TRPS1	2.38104	0.0270288	2.43854	1.16856	1.26999	Resistant
			dasatinib	EC50	TMX4	3.58475	0.00859708	4.84486	2.32198	2.08652	Resistant		dasatinib	EC50	ARLY	3.06784	0.00686671	0.684907	-0.366731	1.05164	Resistant
			dasatinib	EC50	C20orf173	2.59948	0.0364038	0.0284854	0.00476152	5.98241	Resistant		dasatinib	EC50	AF1L2	-3.40914	0.00280271	-1.19987	0.651644	-1.85152	Sensitive
			dasatinib	EC50	F10	-3.51912	0.0127162	0.2109	0.484972	0.43487	Sensitive		dasatinib	EC50	ITA6	-3.7156	0.00129974	-1.14027	0.609437	-1.74971	Sensitive
			dasatinib	EC50	PRKCG	-5.57601	0.00204397	0.0727142	0.589277	0.123396	Sensitive		dasatinib	EC50	C1QR1	6.73875	0.0161049	0.267744	-1.50858	1.77633	Resistant
			dasatinib	EC50	TRPV5	2.4327	0.04002	0.0114842	0.00239255	4.8	Resistant		dasatinib	EC50	PTPA	3.17461	0.00473819	0.766261	-0.30999	1.07625	Resistant
			dasatinib	EC50	PLA2G5	-3.42587	0.0118184	0.00852887	0.042599	0.200213	Sensitive		dasatinib	EC50	PEX10	5.58402	0.0306059	0.701849	-0.412134	1.11398	Resistant
			dasatinib	EC50	MCHR1	-3.75888	0.00517987	0.0170588	0.0881588	0.193501	Sensitive		dasatinib	EC50	IF2B3	-2.71251	0.0191355	-1.49125	0.0450487	-1.5363	Sensitive
			dasatinib	EC50	HOXD1	-3.19966	0.0237929	0.0168129	0.976096	0.0172246	Sensitive		dasatinib	EC50	IF2B2	-3.33286	0.00443186	-1.48808	-0.196908	-1.29118	Sensitive
			dasatinib	EC50	HOXD3	-3.21693	0.0235326	0.00287106	0.654393	0.00438736	Sensitive		dasatinib	EC50	ACHE	3.16331	0.00694408	0.707472	-0.328868	1.03634	Resistant
			dasatinib	EC50	CHN1	3.5249	0.0122709	3.70692	1.05192	3.52395	Resistant		dasatinib	EC50	AMPB	2.6198	0.0268771	1.01476	-0.277598	1.29236	Resistant
			dasatinib	EC50	LOXL1	3.46227	0.00717402	3.90627	1.68711	2.31535	Resistant		dasatinib	EC50	PML	-3.13203	0.00988793	-1.20515	0.0181192	-1.22327	Sensitive
			dasatinib	EC50	EPB41L4A	-2.66136	0.0325069	1.37944	3.08078	0.447757	Sensitive		dasatinib	EC50	AT2A3	2.4951	0.0276939	1.41896	0.151627	1.26733	Resistant
			dasatinib	EC50	LBP	-3.05203	0.0142864	0.00574212	0.0238076	0.241188	Sensitive		dasatinib	EC50	CF211	2.73481	0.015873	1.03834	-0.29272	1.33106	Resistant
			dasatinib	EC50	BST2	-3.35085	0.00852732	2.62635	5.92385	0.443351	Sensitive		dasatinib	EC50	PRD16	-3.34928	0.00734589	-1.00417	0.0492276	-1.0534	Sensitive
			dasatinib	EC50	OLFM1	3.44926	0.0253477	4.14446	0.294528	14.0715	Resistant		dasatinib	EC50	MAFF	-2.72309	0.0248927	-1.13156	0.085675	-1.21724	Sensitive
			dasatinib	EC50	CCDC62	-3.36404	0.0255558	0.144025	0.325608	0.442326	Sensitive		dasatinib	EC50	LAMP3	-2.8373	0.0347077	-1.41978	1.61759	-3.03737	Sensitive
			dasatinib	EC50	ANO1	-3.14904	0.0117956	1.77632	4.69047	0.378709	Sensitive		dasatinib	EC50	5NTD	-3.09074	0.00678592	-1.08139	0.520312	-1.60171	Sensitive
			dasatinib	EC50	TNS4	-3.30167	0.0169033	1.25847	3.7936	0.331734	Sensitive		dasatinib	EC50	SE1L3	-2.95504	0.0112127	-1.08486	0.0374828	-1.12235	Sensitive
			dasatinib	EC50	RAI2	4.08614	0.014747	0.901404	0.039957	22.5593	Resistant		dasatinib	EC50	AP3B2	5.78753	0.0102607	0.965497	-0.955315	1.92081	Resistant
			dasatinib	EC50	NR0B2	-3.00448	0.0159329	0.00852887	0.0539968	0.157951	Sensitive		dasatinib	EC50	KCC1D	2.36671	0.0314738	1.10097	0.0683699	1.0326	Resistant
			dasatinib	EC50	RTBDN	-4.5754	0.0015947	0.500107	1.52381	0.328195	Sensitive		dasatinib	EC50	UD13	-3.68142	0.0015608	-1.70227	-0.0258517	-1.67641	Sensitive
			dasatinib	EC50	MATN3	4.69463	0.00167131	2.39359	0.838938	2.85312	Resistant		dasatinib	EC50	PTGES	-2.88719	0.00933232	0.231231	2.40405	-2.17282	Sensitive
			dasatinib	EC50	PPARG	-0.986834	0.349586	0.174659	0.358158	0.487658	Sensitive		dasatinib	EC50	CYTC	-3.17398	0.0045977	-1.08302	0.0777488	-1.16077	Sensitive
			dasatinib	EC50	ATP1A4	-3.27254	0.0216129	0.0170577	0.394926	0.0431922	Sensitive		dasatinib	EC50	STEA2	-2.75153	0.0203547	-0.602711	0.493406	-1.09612	Sensitive
			dasatinib	EC50	HAPLN2	-2.61252	0.0473558	0.04822	0.256124	0.188268	Sensitive		dasatinib	EC50	PSA	2.46455	0.0257538	0.883442	-0.125575	1.00902	Resistant
			dasatinib	EC50	CHIT1	4.19107	0.0110658	0.0970148	0.00715407	13.5608	Resistant		dasatinib	EC50	S38A2	-4.48448	0.000223937	-1.54155	0.135856	-1.67741	Sensitive
			dasatinib	EC50	KL	-2.38885	0.0582297	0.866611	2.21346	0.391519	Sensitive		dasatinib	EC50	GSTP1	-2.65838	0.0169763	-1.90609	-0.560476	-1.34561	Sensitive
			dasatinib	EC50	RNF128	-2.96387	0.0224332	0.295452	1.85078	0.159637	Sensitive		dasatinib	EC50	CAP2	2.74575	0.0122352	1.02606	-0.0186165	1.04468	Resistant
			dasatinib	EC50	PRAM1	-3.88441	0.00740139	0.139145	0.438412	0.317384	Sensitive		dasatinib	EC50	DHB11	-2.45058	0.0231329	-1.95542	-0.838967	-1.11645	Sensitive
			dasatinib	EC50	PDE6B	3.7407	0.00612904	2.80734	0.822927	3.41141	Resistant		dasatinib	EC50	CD44	-2.18649	0.0429138	-0.788346	0.812783	-1.60113	Sensitive
			dasatinib	EC50	PLAAT4	-2.90209	0.0176277	2.64215	5.50045	0.480352	Sensitive		dasatinib	EC50	LANC1	4.2679	0.000499425	0.463844	-0.716157	1.18	Resistant
			dasatinib	EC50	PDZD2	-5.20273	0.000571424	0.86991	3.50258	0.248362	Sensitive		dasatinib	EC50	F1711	-7.30409	0.00186843	-0.794127	0.807386	-1.60151	Sensitive
			dasatinib	EC50	SFTPD	4.02324	0.00959273	0.795466	0.19273	4.12737	Resistant		dasatinib	EC50	SETD7	3.8022	0.00123162	0.806134	-0.313074	1.11921	Resistant
			dasatinib	EC50	TMTC1	3.31432	0.0284326	1.87167	0.161658	11.578	Resistant		dasatinib	EC50	PIAS3	4.8347	0.00278629	0.67404	-0.386808	1.06085	Resistant
			dasatinib	EC50	PTPN22	3.8935	0.0163501	0.330447	0.0377721	8.74844	Resistant		dasatinib	EC50	LYSM1	4.59763	0.000276924	1.15922	-0.616385	1.7756	Resistant
			dasatinib	EC50	ERN2	-2.88718	0.0198297	0.0140779	0.0899889	0.15644	Sensitive		dasatinib	EC50	NAGK	3.63324	0.00218397	0.968508	-0.119144	1.08765	Resistant
			dasatinib	EC50	DTNA	6.13335	0.000172231	4.07266	0.737036	5.52572	Resistant		dasatinib	EC50	ANXA3	-2.15462	0.043038	-0.577094	0.61389	-1.19098	Sensitive
			dasatinib	EC50	DAGLA	2.92715	0.0168425	2.53112	1.24373	2.03511	Resistant		dasatinib	EC50	LYN	-3.64458	0.001756	-1.19935	0.021965	-1.22132	Sensitive
			dasatinib	EC50	GGACT	2.84093	0.0327522	1.95136	0.84766	2.30206	Resistant		dasatinib	EC50	MET	-2.60788	0.0208647	-1.20202	0.294536	-1.49655	Sensitive
			dasatinib	EC50	SLC37A2	-2.53266	0.0380974	0.62687	2.26636	0.276598	Sensitive		dasatinib	EC50	IKKB	2.92706	0.0133173	0.919722	-0.269925	1.18965	Resistant
			dasatinib	EC50	KLB	3.03422	0.0163219	0.533125	0.1957	2.72419	Resistant		dasatinib	EC50	PHLA1	-3.06919	0.00649863	-1.34256	0.550597	-1.89316	Sensitive
			dasatinib	EC50	FAM189A2	5.05988	0.000958704	2.55852	0.549198	4.65864	Resistant		dasatinib	EC50	CLIC5	-2.65732	0.018258	-1.23535	1.72761	-2.96296	Sensitive
			dasatinib	EC50	B4GALNT1	3.26933	0.0163172	4.93291	1.99315	2.47493	Resistant		dasatinib	EC50	TT39C	2.99807	0.00866759	0.821334	-0.235794	1.05713	Resistant
			dasatinib	EC50	PKIB	2.84921	0.0192029	4.81196	2.25182	2.13692	Resistant		dasatinib	EC50	IL1AP	-3.58596	0.00248955	-0.791517	0.36524	-1.15676	Sensitive
			dasatinib	EC50	DOCK10	3.5698	0.00619801	2.3441	1.0847	2.16106	Resistant		dasatinib	EC50	IL1AP	-3.65198	0.00162929	-0.752371	0.379608	-1.13198	Sensitive
			dasatinib	EC50	IL36G	-2.97507	0.0192969	0.0326997	0.24219	0.135017	Sensitive		dasatinib	EC50	KLF4	-2.6671	0.0252069	-1.33499	0.418524	-1.75351	Sensitive
			dasatinib	EC50	WDR38	-3.34326	0.0153619	0.0226334	0.171158	0.132237	Sensitive		dasatinib	EC50	PDPK1	3.27308	0.00838766	1.0187	-0.122505	1.14121	Resistant
			dasatinib	EC50	IL33	-4.18929	0.0025034	0.00861317	0.0332378	0.259138	Sensitive		dasatinib	EC50	SRBS2	-2.5098	0.0232229	-0.532405	0.735758	-1.26816	Sensitive
			dasatinib	EC50	PI15	2.99205	0.0384173	1.0014	0.105887	9.45726	Resistant		dasatinib	EC50	PPB1	-2.83869	0.0168431	-1.2778	1.47786	-2.75566	Sensitive
			dasatinib	EC50	TMPRSS4	-2.97831	0.0156147	2.39035	4.83921	0.493954	Sensitive		dasatinib	EC50	LR16C	3.46384	0.0164073	-0.0490215	-1.05634	1.00732	Resistant
			dasatinib	EC50	TRPC6	3.40587	0.0250735	0.332102	0.0258557	12.8445	Resistant		dasatinib	EC50	AKAP5	-2.62142	0.0238325	-0.951989	0.570959	-1.52295	Sensitive
			dasatinib	EC50	BRDT	-2.90392	0.0271843	0.00852887	0.0896284	0.0951581	Sensitive		dasatinib	EC50	PROSC	3.44023	0.00474492	0.623452	-0.498882	1.12233	Resistant
			dasatinib	EC50	LOXL4	-3.37437	0.0189701	0.123966	0.587006	0.211183	Sensitive		dasatinib	EC50	TR10A	-2.32966	0.0456068	-0.487552	0.607287	-1.09484	Sensitive
			dasatinib	EC50	ENPEP	2.83125	0.0339232	1.23532	0.277311	4.45465	Resistant		dasatinib	EC50	TF	-3.63934	0.00223478	-1.02278	1.6307	-2.65348	Sensitive
			dasatinib	EC50	ERP27	-4.40948	0.0056703	0.791227	2.98326	0.265222	Sensitive		dasatinib	EC50	PCSK9	-2.79689	0.0141561	-0.65058	0.416938	-1.06752	Sensitive
			dasatinib	EC50	ANP32D	2.79473	0.0304634	0.0228553	0.0047851	4.77635	Resistant		dasatinib	EC50	PTRF	-2.45356	0.0247739	-1.03245	0.568336	-1.60079	Sensitive
			dasatinib	EC50	SLC7A1	-1.82811	0.12231	0.00287106	0.0282482	0.101637	Sensitive		dasatinib	EC50	RAI3	-2.31362	0.03182	-0.639766	0.89337	-1.53314	Sensitive
			dasatinib	EC50	TSPAN3	-2.26783	0.0687166	0.014271	0.103932	0.13731	Sensitive		dasatinib	EC50	SKIV2	3.97985	0.000851773	0.532888	-0.475483	1.00837	Resistant
			dasatinib	EC50	GOLGA6D	2.33094	0.0446841	0.0756242	0.028161	2.68543	Resistant		dasatinib	EC50	BORG2	-3.61063	0.00317738	-0.628439	0.54095	-1.16939	Sensitive
			dasatinib	EC50	SLC5A2	-3.67881	0.00520986	0.304145	0.828245	0.367216	Sensitive		dasatinib	EC50	NECD	-10.3157	0.00926689	-1.47487	-0.447526	-1.02734	Sensitive
			dasatinib	EC50	CDH13	-2.49599	0.0445902	0.437193	1.74507	0.25053	Sensitive		dasatinib	EC50	CDD	-2.21717	0.0388498	-0.647974	0.790295	-1.43827	Sensitive
			dasatinib	EC50	RHBDL3	-2.70286	0.0414197	0.114476	0.955723	0.11978	Sensitive		dasatinib	EC50	AK1C3	-2.63476	0.0156362	-1.17592	-0.0750214	-1.1009	Sensitive
			dasatinib	EC50	MEP1B	2.478	0.0436271	0.0836018	0.0307114	2.72218	Resistant		dasatinib	EC50	TSN3	-2.26222	0.0431697	-1.32603	-0.229102	-1.09693	Sensitive
			dasatinib	EC50	CACNG8	-2.70875	0.0316568	0.0611589	0.244337	0.250305	Sensitive		dasatinib	EC50	GGCT	2.40044	0.035638	1.10494	-0.0873252	1.19226	Resistant
			dasatinib	EC50	PRDM16	2.67006	0.047614	0.280046	0.0533116	5.253	Resistant		dasatinib	EC50	LPP1	-2.63436	0.027535	-1.58486	0.326473	-1.91133	Sensitive
			dasatinib	EC50	CASQ1	-2.44133	0.0426765	0.185609	0.5273	0.352	Sensitive		dasatinib	EC50	TGM5	-3.11741	0.0117739	-1.19385	0.0616521	-1.2555	Sensitive
			dasatinib	EC50	KCNH1	3.15425	0.0248202	0.815631	0.129433	6.30157	Resistant		dasatinib	EC50	PLBL1	-2.49567	0.021137	-0.187396	1.04123	-1.22863	Sensitive
			dasatinib	EC50	KCNN3	-3.1597	0.0156153	0.00287106	0.023785	0.120709	Sensitive		dasatinib	EC50	B0QYD3	-2.16218	0.0472147	-0.471619	0.676828	-1.14845	Sensitive
			dasatinib	EC50	SYT2	-5.54382	0.000380094	0.0425633	0.102	0.417286	Sensitive		dasatinib	EC50	ABC3C	-2.16341	0.0475577	-1.8105	-0.771919	-1.03858	Sensitive
			dasatinib	EC50	GALM	-3.01094	0.0157155	0.8486	3.87026	0.219262	Sensitive		dasatinib	EC50	ABC3F	-2.95842	0.0445755	-1.16694	0.909174	-2.07612	Sensitive
			dasatinib	EC50	CNGA3	3.70429	0.00559353	0.0257264	0.0119627	2.15054	Resistant		dasatinib	EC50	ANXA6	2.48773	0.0262058	1.78203	0.213248	1.56879	Resistant
			dasatinib	EC50	IGSF11	-2.93352	0.0239367	0.0691563	0.3079	0.224606	Sensitive		dasatinib	EC50	DEN2A	2.49882	0.0382006	1.78716	-0.245724	2.03288	Resistant
			dasatinib	EC50	FAM86B2	3.31391	0.0090986	1.03093	0.387652	2.65941	Resistant		dasatinib	EC50	TSN6	-3.95677	0.000744358	-0.890784	0.752243	-1.64303	Sensitive
			dasatinib	EC50	CYP4V2	-5.02727	0.00179303	0.815824	2.31892	0.351812	Sensitive		dasatinib	EC50	RN213	3.57919	0.00420954	0.504589	-0.850928	1.35552	Resistant
			dasatinib	EC50	ROPN1L	-2.61041	0.046475	0.309456	0.889245	0.347999	Sensitive		dasatinib	EC50	RUND1	2.63594	0.0216787	1.2291	-0.106031	1.33513	Resistant
			dasatinib	EC50	TIMD4	-2.99182	0.0303836	0	0.0237378	0	Sensitive		dasatinib	EC50	TPX2	-2.55832	0.0236387	-0.517761	0.52867	-1.04643	Sensitive
			dasatinib	EC50	N4BP3	2.97362	0.0233058	3.84151	1.76916	2.17137	Resistant		dasatinib	EC50	CXAR	-2.81273	0.0161544	-0.46538	0.757794	-1.22317	Sensitive
			dasatinib	EC50	MLIP	-3.88543	0.00395351	0.0501923	0.316149	0.158762	Sensitive		dasatinib	EC50	IDHP	3.45358	0.00237943	1.35702	0.0948544	1.26216	Resistant
			dasatinib	EC50	HMGCLL1	3.90195	0.0156156	1.83509	0.164647	11.1456	Resistant		dasatinib	EC50	DHE4	2.27311	0.0443217	1.28034	-1.23432	2.51465	Resistant
			dasatinib	EC50	GABRR1	-2.4327	0.04002	0.00287106	0.0119627	0.24	Sensitive		dasatinib	EC50	ACBP	2.43155	0.0280086	0.82715	-0.516694	1.34384	Resistant
			dasatinib	EC50	SYTL5	5.07593	0.00137748	3.2033	0.428575	7.47431	Resistant		dasatinib	EC50	PHP14	2.36171	0.0282862	0.700322	-0.302685	1.00301	Resistant
			dasatinib	EC50	IGSF1	-2.93352	0.0239367	0.0691563	0.3079	0.224606	Sensitive		dasatinib	EC50	ENSA	2.29406	0.0417255	0.744196	-0.312463	1.05666	Resistant
			dasatinib	EC50	RSPO2	4.58349	0.00194516	0.102879	0.018661	5.51305	Resistant		dasatinib	EC50	3BHS7	3.18006	0.0252272	2.24825	0.728658	1.51959	Resistant
			dasatinib	EC50	FAM13C	2.87291	0.0446902	0.881262	0.039403	22.3654	Resistant		dasatinib	EC50	IBP3	-2.52196	0.0226701	-0.398432	1.12797	-1.5264	Sensitive
			dasatinib	EC50	LYPD1	2.67768	0.0269313	2.95937	0.924383	3.20145	Resistant		dasatinib	EC50	TWSG1	-3.26779	0.00459245	-0.715734	0.682397	-1.39813	Sensitive
			dasatinib	EC50	ALLC	-3.01072	0.029731	0	0.0237387	0	Sensitive		dasatinib	EC50	THMS2	-2.48376	0.0437963	-1.17955	-0.115839	-1.06371	Sensitive
			dasatinib	EC50	ITIH2	3.01683	0.0297045	0.0914982	0.0189999	4.81572	Resistant		dasatinib	EC50	ZNF35	-12.0663	0.000270536	-0.842316	0.513204	-1.35552	Sensitive
			dasatinib	EC50	TMEM45B	-4.06202	0.0061888	1.013	4.1516	0.244003	Sensitive		dasatinib	EC50	DHSO	2.62294	0.0307088	1.0547	-0.463288	1.51799	Resistant
			dasatinib	EC50	TMEM163	3.60264	0.0222576	0.573212	0.0259735	22.0691	Resistant		dasatinib	EC50	AREL1	-29.1743	0.00117283	-0.649042	0.392919	-1.04196	Sensitive
			dasatinib	EC50	TMEM178A	-2.92307	0.0304388	0.154272	1.02421	0.150626	Sensitive		dasatinib	EC50	EDIL3	-3.39173	0.00400773	-1.54402	0.173106	-1.71713	Sensitive
			dasatinib	EC50	TRIM36	2.76486	0.0261387	1.9989	0.804744	2.4839	Resistant		dasatinib	EC50	MUC16	-3.56629	0.00408802	-0.640825	1.87016	-2.51098	Sensitive
			dasatinib	EC50	SPARCL1	5.02328	0.00509357	0.415577	0.046656	8.90726	Resistant		dasatinib	EC50	B4E1Z4	-3.77692	0.00364089	-0.0476552	1.93148	-1.97913	Sensitive
			dasatinib	EC50	ZIC1	2.69978	0.0403101	4.92119	2.24327	2.19376	Resistant		dasatinib	EC50	GPD1L	2.91188	0.0166438	1.2297	-0.187858	1.41756	Resistant
			dasatinib	EC50	ACMSD	3.08059	0.0364933	0.336789	0.0425768	7.91016	Resistant		dasatinib	EC50	GFRP	2.58087	0.0224106	0.188193	-2.37105	2.55925	Resistant
			dasatinib	EC50	CD8A	4.27012	0.0020806	0.772561	0.27966	2.7625	Resistant		dasatinib	EC50	FOSL1	-2.23285	0.0435728	-1.11868	0.090025	-1.2087	Sensitive
			dasatinib	EC50	MCOLN2	3.06505	0.026683	1.44386	0.347431	4.15582	Resistant		dasatinib	EC50	RABP1	3.92469	0.00425241	2.78444	-0.113853	2.89829	Resistant
			dasatinib	EC50	RETREG1	-4.0087	0.00389074	1.62484	3.37085	0.482026	Sensitive		dasatinib	EC50	RABP2	2.27444	0.0385296	2.37624	0.407255	1.96899	Resistant
			dasatinib	EC50	CERS3	-2.92532	0.032718	0.0341166	0.755228	0.0451738	Sensitive		dasatinib	EC50	RN149	-3.79424	0.0015225	-0.721851	0.328564	-1.05042	Sensitive
			dasatinib	EC50	C10orf90	2.5147	0.0376398	0.0782831	0.0307114	2.54899	Resistant		dasatinib	EC50	DTD2	2.72485	0.025788	0.632779	-0.378041	1.01082	Resistant
			dasatinib	EC50	RAB6B	2.80652	0.0238165	3.27475	1.08131	3.02849	Resistant		dasatinib	EC50	BASI	-3.20343	0.00642548	-1.18002	0.0278702	-1.20789	Sensitive
			dasatinib	EC50	GPR78	-2.89595	0.031992	0.0367689	0.28604	0.128545	Sensitive		dasatinib	EC50	PLCB4	3.12491	0.00813781	1.27852	-0.449838	1.72836	Resistant
			dasatinib	EC50	FLACC1	3.25321	0.0134591	1.00104	0.35224	2.84194	Resistant		dasatinib	EC50	PRR11	-3.01959	0.0223521	-0.983455	0.40066	-1.38411	Sensitive
			dasatinib	EC50	SLC26A2	4.06949	0.00280917	4.45759	1.76368	2.52743	Resistant		dasatinib	EC50	PPT1	2.7172	0.0161952	1.1612	0.148976	1.01223	Resistant
			dasatinib	EC50	SAXO1	3.34591	0.0243438	0.0535545	0.00717764	7.46129	Resistant		dasatinib	EC50	TEAD1	-3.43081	0.00346748	-1.11551	0.0748784	-1.19039	Sensitive
			dasatinib	EC50	FUT6	-2.71598	0.0354903	0.0890625	0.530603	0.167852	Sensitive		dasatinib	EC50	GPX7	-2.88615	0.0100868	-0.966136	1.15266	-2.1188	Sensitive
			dasatinib	EC50	GHRL	2.72547	0.0275198	0.563734	0.257262	2.19128	Resistant		dasatinib	EC50	AASD1	4.46914	0.00072696	0.484114	-0.742632	1.22675	Resistant
			dasatinib	EC50	FZD1	1.61539	0.181511	1.32646	0.0142148	93.3154	Resistant		dasatinib	EC50	GRAN	3.49186	0.00533523	1.0482	-0.264818	1.31302	Resistant
			dasatinib	EC50	DPYSL5	-4.20779	0.00312223	0.193264	1.06993	0.180633	Sensitive		dasatinib	EC50	PX11B	3.72031	0.00270954	0.925491	-0.122833	1.04832	Resistant
			dasatinib	EC50	EXTL1	-2.98683	0.0190505	0.0667901	0.226717	0.294596	Sensitive		dasatinib	EC50	CAV1	-3.34218	0.00366101	-1.57407	0.504283	-2.07836	Sensitive
			dasatinib	EC50	TRIM63	-2.57392	0.049297	0.00574212	0.129121	0.0444708	Sensitive		dasatinib	EC50	PODXL	-2.61729	0.0165816	-0.297321	0.816983	-1.1143	Sensitive
			dasatinib	EC50	RGL4	2.69832	0.0255429	0.322824	0.13594	2.37476	Resistant		dasatinib	EC50	SCEL	-3.12162	0.00964851	-1.43359	0.679736	-2.11333	Sensitive
			dasatinib	EC50	UROC1	-5	0.00410472	0	0.0119627	0	Sensitive		dasatinib	EC50	SIM13	-4.37578	0.00139049	-1.09991	0.868098	-1.96801	Sensitive
			dasatinib	EC50	C16orf86	-3.85675	0.00903493	0.422265	1.21757	0.34681	Sensitive		dasatinib	EC50	ARGAL	2.26115	0.0423961	1.03826	-0.12805	1.16631	Resistant
			dasatinib	EC50	ZNF233	2.96212	0.0264669	1.15092	0.564465	2.03896	Resistant		dasatinib	EC50	HEG1	-2.56918	0.0197464	-0.561779	0.531416	-1.09319	Sensitive
			dasatinib	EC50	CPAMD8	-2.98892	0.0155949	1.00581	2.56656	0.391889	Sensitive		dasatinib	EC50	ID1	-3.08943	0.00632377	-0.971523	0.163317	-1.13484	Sensitive
			dasatinib	EC50	CLDND2	-2.63368	0.0293978	0.409369	0.953322	0.429413	Sensitive		dasatinib	EC50	ASSY	2.31179	0.0409496	1.74465	0.349804	1.39485	Resistant
			dasatinib	EC50	CHRNB2	2.84941	0.0397473	0.224888	0.06544	3.43655	Resistant		dasatinib	EC50	ROR1	-2.8286	0.0111389	-1.19638	0.540331	-1.73671	Sensitive
			dasatinib	EC50	PTH1R	3.6801	0.00556402	0.325219	0.127584	2.54906	Resistant		dasatinib	EC50	PDCD4	2.68153	0.0246476	1.25761	-0.207707	1.46531	Resistant
			dasatinib	EC50	FOXH1	-3.15674	0.0172115	0.255056	0.884308	0.288424	Sensitive		dasatinib	EC50	SPTB2	-3.24853	0.00519156	-1.14863	0.618062	-1.76669	Sensitive
			dasatinib	EC50	KASH5	-2.95451	0.0293456	0.0390443	0.43304	0.0901633	Sensitive		dasatinib	EC50	INGR1	-3.82086	0.00151799	-0.670246	0.612094	-1.28234	Sensitive
			dasatinib	EC50	MEIOB	-2.92259	0.0327906	0.00861317	0.267453	0.0322044	Sensitive		dasatinib	EC50	GP110	-2.87751	0.015613	-1.5714	1.08239	-2.65379	Sensitive
			dasatinib	EC50	ELAVL4	4.46519	0.00660854	0.0998576	0.0142846	6.99059	Resistant		dasatinib	EC50	CENPV	-2.73426	0.0158347	-1.07958	0.3463	-1.42588	Sensitive
			dasatinib	EC50	ADGRL4	-2.96178	0.0213156	0.00574212	0.0308221	0.186299	Sensitive		dasatinib	EC50	CENPV	-2.39107	0.0336004	-0.864536	0.762129	-1.62667	Sensitive
			dasatinib	EC50	KCNJ9	-2.57638	0.0354695	0.0170588	0.0764956	0.223004	Sensitive		dasatinib	EC50	HSPB1	2.50347	0.0210504	1.50218	0.299662	1.20252	Resistant
			dasatinib	EC50	TDRD5	3.64165	0.0174149	2.00058	0.395522	5.05809	Resistant		dasatinib	EC50	NUD22	4.10365	0.00169073	1.00495	-0.265402	1.27035	Resistant
			dasatinib	EC50	PM20D1	3.78097	0.0188133	0.0994139	0.00239255	41.5515	Resistant		dasatinib	EC50	GLU2B	-2.81704	0.0155778	-0.668703	0.447234	-1.11594	Sensitive
			dasatinib	EC50	FCMR	2.80553	0.0228444	1.99646	0.95074	2.0999	Resistant		dasatinib	EC50	SPY2	-2.594	0.0475276	-0.792453	0.321048	-1.1135	Sensitive
			dasatinib	EC50	DISC1	5.2004	0.00294474	1.50221	0.424806	3.53623	Resistant		dasatinib	EC50	PTN7	2.461	0.0435087	-0.906838	-2.11354	1.2067	Resistant
			dasatinib	EC50	ACTG2	3.3838	0.0247687	2.83787	0.462903	6.13059	Resistant		dasatinib	EC50	CRIM1	-2.24763	0.0403872	-0.354408	0.734319	-1.08873	Sensitive
			dasatinib	EC50	KBTBD8	4.56128	0.00136549	0.773113	0.256511	3.01396	Resistant		dasatinib	EC50	LPP2	-2.27001	0.0380145	-0.245403	0.790355	-1.03576	Sensitive
			dasatinib	EC50	MNDA	-2.74312	0.040641	0	0.0143081	0	Sensitive		dasatinib	EC50	E9PLM6	-2.56631	0.0214057	-0.489768	1.08434	-1.5741	Sensitive
			dasatinib	EC50	TGM4	-3.09634	0.0129188	0.0554996	0.191254	0.290189	Sensitive		dasatinib	EC50	GBG12	-3.04843	0.00671951	-0.584	0.443654	-1.02765	Sensitive
			dasatinib	EC50	TKT	-1.63809	0.153256	0.00861317	0.0283389	0.303935	Sensitive		dasatinib	EC50	ISOC1	3.28185	0.00973987	1.29713	-0.373424	1.67056	Resistant
			dasatinib	EC50	ASB5	3.51353	0.00942891	0.0370143	0.00949994	3.89626	Resistant		dasatinib	EC50	CB39L	2.57621	0.0280763	1.49868	-0.125264	1.62394	Resistant
			dasatinib	EC50	C4orf45	-2.74312	0.040641	0	0.0143081	0	Sensitive		dasatinib	EC50	CRIP2	2.44598	0.0290408	1.94082	0.198509	1.74231	Resistant
			dasatinib	EC50	NPY1R	3.82358	0.0183403	3.58834	0.149282	24.0374	Resistant		dasatinib	EC50	IBP2	2.56455	0.0197513	0.851998	-0.326474	1.17847	Resistant
			dasatinib	EC50	NPY5R	3.82554	0.0186746	0.798469	0.0047851	166.866	Resistant		dasatinib	EC50	ERRFI	-2.66813	0.0176707	-1.30612	0.109722	-1.41584	Sensitive
			dasatinib	EC50	FAM170A	3.57638	0.0232427	0.0725683	0	Inf	Resistant		dasatinib	EC50	PRDBP	-2.54241	0.0194005	-0.50022	1.08365	-1.58387	Sensitive
			dasatinib	EC50	TXLNB	2.88083	0.0240993	0.275122	0.0748802	3.67417	Resistant		dasatinib	EC50	CXA1	-2.59577	0.0181608	-2.06832	-0.603771	-1.46455	Sensitive
			dasatinib	EC50	BMPER	3.25003	0.0156802	0.357161	0.115373	3.0957	Resistant		dasatinib	EC50	MBP	-2.79097	0.0109663	-0.854907	0.464054	-1.31896	Sensitive
			dasatinib	EC50	SYTL3	-2.56828	0.0304761	1.14879	2.38586	0.4815	Sensitive		dasatinib	EC50	PHKG2	4.32488	0.000371912	1.16558	0.0534137	1.11217	Resistant
			dasatinib	EC50	PGAM2	-3.27738	0.0105927	0.124461	0.487289	0.255415	Sensitive		dasatinib	EC50	TNR21	-3.22307	0.00595869	-1.06751	0.372608	-1.44012	Sensitive
			dasatinib	EC50	C8orf48	2.75498	0.0235604	1.03437	0.276117	3.74612	Resistant		dasatinib	EC50	ELMO3	2.7223	0.0159255	0.845328	-0.409458	1.25479	Resistant
			dasatinib	EC50	C9orf24	-3.00428	0.0151403	0.172611	0.424067	0.407037	Sensitive		dasatinib	EC50	HDHD2	3.72351	0.00127547	0.508684	-0.8589	1.36758	Resistant
			dasatinib	EC50	ALDH1A1	-3.38289	0.0163449	0.666579	3.32113	0.200708	Sensitive		dasatinib	EC50	APOH	-2.79934	0.0119382	-0.929701	0.323065	-1.25277	Sensitive
			dasatinib	EC50	RNF183	-3.02218	0.0163153	0.127366	0.356565	0.357203	Sensitive		dasatinib	EC50	PYRD2	-2.66314	0.0285985	-0.815943	1.08008	-1.89603	Sensitive
			dasatinib	EC50	FOLR2	-4.35495	0.00732496	0	0.0401611	0	Sensitive		dasatinib	EC50	COF1	4.14582	0.000613854	0.833439	-0.320513	1.15395	Resistant
			dasatinib	EC50	MAGEC3	5.33429	0.000853759	0.223674	0.0410287	5.45165	Resistant		dasatinib	EC50	PVRL3	-3.45076	0.00883788	-0.888231	0.555622	-1.44385	Sensitive
			dasatinib	EC50	KCNC2	-2.74312	0.040641	0	0.0143081	0	Sensitive		dasatinib	EC50	GSTT1	3.07394	0.0168083	1.91249	-1.07179	2.98428	Resistant
			dasatinib	EC50	CYB5R2	-3.0856	0.0131039	1.25001	3.57742	0.349417	Sensitive		dasatinib	EC50	TNR3	-3.50676	0.00230989	-0.678689	0.761867	-1.44056	Sensitive
			dasatinib	EC50	LMO1	2.91522	0.0316858	0.855777	0.131517	6.50696	Resistant		dasatinib	EC50	TRAF5	2.92023	0.0189979	0.952693	-0.912906	1.8656	Resistant
			dasatinib	EC50	CRABP1	2.77597	0.026173	4.93784	1.05397	4.68499	Resistant		dasatinib	EC50	GSKIP	2.46425	0.0277313	0.332467	-0.833008	1.16548	Resistant
			dasatinib	EC50	PRTG	3.22494	0.0172508	1.82363	0.599837	3.04021	Resistant		dasatinib	EC50	ABRAL	2.22131	0.0394044	0.776168	-0.229771	1.00594	Resistant
			dasatinib	EC50	SLC38A8	-4.53265	0.00485285	0.0114559	0.118989	0.0962772	Sensitive		dasatinib	EC50	MT1L	-2.60636	0.028986	-2.0118	0.622482	-2.63428	Sensitive
			dasatinib	EC50	LDHC	-2.8528	0.0329238	0.0720591	0.491405	0.146639	Sensitive		dasatinib	EC50	ISG15	-2.24729	0.0363653	-0.582884	0.477331	-1.06022	Sensitive
			dasatinib	EC50	NKX3.1	-2.77531	0.0263982	0.798635	2.38444	0.334935	Sensitive		dasatinib	EC50	ELOV7	-2.60536	0.0309965	-0.136615	0.976372	-1.11299	Sensitive
			dasatinib	EC50	GNGT2	-4.32166	0.00202682	0.0113167	0.0793129	0.142684	Sensitive		dasatinib	EC50	DAF	-3.68652	0.0014705	-0.488429	0.669201	-1.15763	Sensitive
			dasatinib	EC50	SNX20	-2.91161	0.0201606	0.0142987	0.0517361	0.276378	Sensitive		dasatinib	EC50	IKZF5	-3.29425	0.00776093	-1.14473	-0.0580209	-1.08671	Sensitive
			dasatinib	EC50	CD3D	-2.756	0.040024	0	0.0558716	0	Sensitive		dasatinib	EC50	AP3S2	2.54619	0.0206518	0.568018	-0.528185	1.0962	Resistant
			dasatinib	EC50	TUBA1A	4.52924	0.00142989	7.31317	2.83354	2.58093	Resistant		dasatinib	EC50	CC106	2.4261	0.0406873	0.834701	-0.570832	1.40553	Resistant
			dasatinib	EC50	PSCA	-3.10627	0.0254353	0.659919	5.61106	0.11761	Sensitive		dasatinib	EC50	CAV2	-3.14072	0.00510087	-1.6473	0.688953	-2.33626	Sensitive
			dasatinib	EC50	RCOR2	3.14874	0.0119933	2.00326	0.927833	2.15907	Resistant		dasatinib	EC50	HGD	2.29647	0.0496575	1.03193	-0.873771	1.9057	Resistant
			dasatinib	EC50	CD300C	3.04473	0.028731	0.0725683	0.00710739	10.2103	Resistant		dasatinib	EC50	PERP	-2.90242	0.0229122	-1.41596	0.232682	-1.64864	Sensitive
			dasatinib	EC50	NAALADL1	-4.53068	0.00143882	0.110416	0.43021	0.256657	Sensitive		dasatinib	EC50	F198B	-5.28688	0.0339646	-1.93026	-0.324963	-1.6053	Sensitive
			dasatinib	EC50	KCNV2	3.40058	0.0125065	0.150395	0.0530334	2.83586	Resistant		dasatinib	EC50	CC138	-2.84326	0.0190757	-0.737801	0.620801	-1.3586	Sensitive
			dasatinib	EC50	KIF5C	4.08588	0.00276207	1.93259	0.493761	3.91403	Resistant		dasatinib	EC50	FOLR1	-2.8726	0.0105608	-0.28181	2.43877	-2.72058	Sensitive
			dasatinib	EC50	LDLRAD4	2.72882	0.034952	2.77965	0.929179	2.99151	Resistant		dasatinib	EC50	SPY4	-2.86605	0.00958457	-1.4658	-0.260332	-1.20547	Sensitive
			dasatinib	EC50	OR13J1	-3.75576	0.013215	0	0.0354694	0	Sensitive		dasatinib	EC50	TLR3	-4.1322	0.00105783	-0.761327	1.07993	-1.84126	Sensitive
			dasatinib	EC50	SPRY3	3.51589	0.0162099	1.15658	0.378805	3.05324	Resistant		dasatinib	EC50	CD2A2	-2.48497	0.0262762	-0.438197	0.801855	-1.24005	Sensitive
			dasatinib	EC50	VXN	2.32172	0.0471027	1.29229	0.592053	2.18272	Resistant		dasatinib	EC50	PAR1	-2.87729	0.0182491	-1.27021	0.177601	-1.44781	Sensitive
			dasatinib	EC50	SDC2	2.5275	0.0325521	6.40571	2.63438	2.43159	Resistant		dasatinib	EC50	BLVRB	3.53097	0.00330498	1.40939	-0.228731	1.63812	Resistant
			dasatinib	EC50	CLIC3	-2.4291	0.0406323	1.65372	5.19502	0.318328	Sensitive		dasatinib	EC50	CP2S1	-3.4334	0.00249589	-0.977355	0.364639	-1.34199	Sensitive
			dasatinib	EC50	LINGO1	3.67392	0.012161	1.06648	0.344721	3.09375	Resistant		dasatinib	EC50	TTC37	4.01709	0.000864819	0.639114	-0.503056	1.14217	Resistant
			dasatinib	EC50	SPDYE5	3.59966	0.0175417	0.681575	0.263205	2.58952	Resistant		dasatinib	EC50	TGFR2	-3.91691	0.0011417	-1.09996	0.132839	-1.2328	Sensitive
			dasatinib	EC50	HOXD4	-2.77055	0.0393396	0	0.902892	0	Sensitive		dasatinib	EC50	UPAR	-3.03182	0.00654968	-1.46184	0.182017	-1.64386	Sensitive
			dasatinib	EC50	ZNF804A	-2.74349	0.0404931	0.0753254	1.47539	0.0510547	Sensitive		dasatinib	EC50	UPAR	-3.84635	0.0099648	-1.06756	0.71387	-1.78143	Sensitive
			dasatinib	EC50	METTL7B	2.53504	0.0401988	2.63307	1.03594	2.54171	Resistant		dasatinib	EC50	HG2A	-3.58674	0.00201529	-1.03891	0.407041	-1.44595	Sensitive
			dasatinib	EC50	KRT4	-4.62156	0.00571949	0.188423	6.06811	0.0310514	Sensitive		dasatinib	EC50	BT3A3	-3.65333	0.00211324	-0.446719	0.814312	-1.26103	Sensitive
			dasatinib	EC50	NPAS2	-3.04221	0.0329466	1.75036	3.7081	0.472038	Sensitive		dasatinib	EC50	ATMIN	-2.38423	0.0441296	-1.53713	-0.335038	-1.20209	Sensitive
			dasatinib	EC50	KRT83	3.46085	0.0232529	0.69843	0.18782	3.71861	Resistant		dasatinib	EC50	WLS	-2.30061	0.0423106	-0.681905	0.34224	-1.02415	Sensitive
			dasatinib	EC50	PGK2	2.50788	0.0479689	0.0452135	0.00952305	4.74779	Resistant		dasatinib	EC50	UFC1	4.35466	0.000293764	0.86815	-0.15862	1.02677	Resistant
			dasatinib	EC50	C8orf74	-3.80764	0.0125302	0	0.0167007	0	Sensitive		dasatinib	EC50	IGJ	-24.0007	1.78751e-05	-1.92352	-0.336472	-1.58705	Sensitive
			dasatinib	EC50	NRTN	-3.69214	0.00506152	0.597344	1.31995	0.452551	Sensitive		dasatinib	EC50	RIMB1	3.7592	0.0132106	0.933112	-0.317797	1.25091	Resistant
			dasatinib	EC50	FUT3	-2.61008	0.0319498	0.931152	3.38724	0.2749	Sensitive		dasatinib	EC50	CH047	-3.15296	0.0184395	-1.1486	1.42536	-2.57396	Sensitive
			dasatinib	EC50	TPPP	-1.39706	0.202887	1.40294	3.18729	0.440165	Sensitive		dasatinib	EC50	JARD2	4.41471	0.00692609	1.88292	0.603993	1.27892	Resistant
			dasatinib	EC50	APLN	-1.77651	0.135803	0	0.0258387	0	Sensitive		dasatinib	EC50	PKHB2	-3.40616	0.00808671	-0.746378	0.278298	-1.02468	Sensitive
			dasatinib	EC50	KRT27	-3.13146	0.0259146	0	0.0672984	0	Sensitive		dasatinib	EC50	TMCO4	3.76073	0.00297102	0.915502	-0.153991	1.06949	Resistant
			dasatinib	EC50	VAT1L	3.05054	0.0318143	0.120556	0.030823	3.91123	Resistant		dasatinib	EC50	DKK3	3.83318	0.00499534	1.3824	-0.478554	1.86096	Resistant
			dasatinib	EC50	ARNT2	5.00934	0.0031552	2.05602	0.338924	6.06633	Resistant		dasatinib	EC50	TDRP	-3.88006	0.00376542	-0.0300688	1.2327	-1.26277	Sensitive
			dasatinib	EC50	CTSW	3.30578	0.0156824	0.226293	0.0625644	3.61697	Resistant		dasatinib	EC50	NCEH1	-2.94882	0.00935356	-0.790496	0.240951	-1.03145	Sensitive
			dasatinib	EC50	EFCAB12	-3.06725	0.0140719	0.271864	0.711065	0.382333	Sensitive		dasatinib	EC50	GGPPS	4.27131	0.000432274	1.23893	-0.16848	1.40741	Resistant
			dasatinib	EC50	GXYLT2	2.55522	0.0309434	1.32605	0.557713	2.37765	Resistant		dasatinib	EC50	PRS23	-2.56332	0.0219047	-1.2695	0.360561	-1.63006	Sensitive
			dasatinib	EC50	HPSE2	-3.93171	0.00348569	0.00861317	0.028546	0.301729	Sensitive		dasatinib	EC50	KDEL2	-2.22432	0.0483439	-0.807073	0.22986	-1.03693	Sensitive
			dasatinib	EC50	SYT12	2.7946	0.0234654	5.10523	2.19283	2.32814	Resistant		dasatinib	EC50	PLAL2	-4.33823	0.01227	-1.42733	-0.0590396	-1.36829	Sensitive
			dasatinib	EC50	MMRN2	-2.43419	0.0481784	0.917406	2.47065	0.371321	Sensitive		dasatinib	EC50	PMVK	3.02275	0.0121814	1.00918	-0.212401	1.22158	Resistant
			dasatinib	EC50	GPR148	4	0.0161301	0.0228553	0	Inf	Resistant		dasatinib	EC50	PPN	-5.37399	0.0126162	-1.13744	0.198196	-1.33563	Sensitive
			dasatinib	EC50	SFT2D3	3.28434	0.0271233	0.815768	0.0458345	17.7981	Resistant		dasatinib	EC50	CADM3	9.22902	0.000766088	0.85485	-1.83149	2.68634	Resistant
			dasatinib	EC50	GLIPR1L1	-3.99529	0.00735586	0.0481123	0.176832	0.27208	Sensitive		dasatinib	EC50	PORCN	-3.4658	0.00284023	-0.810302	0.240279	-1.05058	Sensitive
			dasatinib	EC50	PEAK1	4.27159	0.00264017	3.76203	1.71203	2.19741	Resistant		dasatinib	EC50	PEA15	3.09445	0.00620884	0.732178	-0.470366	1.20254	Resistant
			dasatinib	EC50	APOBEC4	-3.38538	0.0195594	0.0143553	0.0378842	0.378926	Sensitive		dasatinib	EC50	SOSB2	-4.49224	0.0461501	-1.92541	0.109562	-2.03497	Sensitive
			dasatinib	EC50	SPDYE2B	5.56427	0.000368172	0.723591	0.347496	2.0823	Resistant		dasatinib	EC50	GAS2	19.1907	0.00270429	-0.970671	-8.00898	7.03831	Resistant
			dasatinib	EC50	WFIKKN2	-2.71086	0.0249203	0.00861317	0.0214622	0.401318	Sensitive		dasatinib	EC50	GTR10	2.47735	0.0370826	1.62628	0.00359235	1.62269	Resistant
			dasatinib	EC50	MARCHF10	3.5107	0.024516	0.404999	0.00476152	85.0565	Resistant		dasatinib	EC50	SDPR	-2.37212	0.028034	-1.35002	0.180809	-1.53083	Sensitive
			dasatinib	EC50	C9orf131	2.7275	0.0233869	0.180786	0.0897217	2.01496	Resistant		dasatinib	EC50	ARY1	2.28681	0.0499285	1.82047	-0.0159846	1.83646	Resistant
			dasatinib	EC50	CD34	-2.37225	0.0497703	0.055832	0.188707	0.295865	Sensitive		dasatinib	EC50	RET4	-3.41523	0.0105111	-0.553409	0.481293	-1.0347	Sensitive
			dasatinib	EC50	REP15	-4.67954	0.00427719	0.254833	0.822422	0.309857	Sensitive		dasatinib	EC50	ZN703	2.48442	0.0316436	0.918849	-0.280019	1.19887	Resistant
			dasatinib	EC50	ZCCHC12	2.74003	0.0352837	0.250273	0.0596445	4.19608	Resistant		dasatinib	EC50	BIEA	2.95967	0.0102062	1.11386	-0.351675	1.46554	Resistant
			dasatinib	EC50	DNAH12	-2.83882	0.0207875	0.0140779	0.0855615	0.164535	Sensitive		dasatinib	EC50	S10AD	2.70683	0.0165607	1.2757	0.246118	1.02958	Resistant
			dasatinib	EC50	ZIC4	3.23301	0.0194101	2.50933	1.00644	2.49327	Resistant		dasatinib	EC50	TNF6B	10.0949	0.00207028	0.330966	-1.07193	1.40289	Resistant
			dasatinib	EC50	NPPA	-3.82331	0.00797104	0.135236	0.448073	0.301816	Sensitive		dasatinib	EC50	TCAL5	3.64251	0.00211385	1.79895	0.157878	1.64108	Resistant
			dasatinib	EC50	MSRA	3.01303	0.0159206	2.75977	1.35659	2.03435	Resistant		dasatinib	EC50	S10A1	4.17623	0.0106149	0.311411	-0.914124	1.22554	Resistant
			dasatinib	EC50	A2M	-1.08937	0.307714	0.648721	1.40263	0.462502	Sensitive		dasatinib	EC50	CNDP2	2.28207	0.0364344	0.63731	-0.418884	1.05619	Resistant
			dasatinib	EC50	DOK7	2.68509	0.044192	3.39574	1.3452	2.52433	Resistant		dasatinib	EC50	MTPN	3.72748	0.00124545	0.267912	-0.74927	1.01718	Resistant
			dasatinib	EC50	GPX2	-3.30028	0.0213838	0.998117	4.33295	0.230355	Sensitive		dasatinib	EC50	BAG2	-2.69812	0.0177804	-1.78596	-0.266419	-1.51954	Sensitive
			dasatinib	EC50	KBTBD11	-3.42106	0.0145017	0.25378	0.926376	0.273949	Sensitive		dasatinib	EC50	PLS1	-2.47136	0.0221066	-0.654168	0.627428	-1.2816	Sensitive
			dasatinib	EC50	SOX11	3.44555	0.0256283	0.881386	0.0255065	34.5554	Resistant		dasatinib	EC50	FABPH	-2.27315	0.0364398	-1.07601	0.0235845	-1.09959	Sensitive
			dasatinib	EC50	MUC20	-2.71258	0.0286529	1.51725	4.73483	0.320444	Sensitive		dasatinib	EC50	HPSE	-3.50946	0.0031821	-1.26741	0.573175	-1.84058	Sensitive
			dasatinib	EC50	NAALADL2	3.813	0.00774659	2.49638	1.17052	2.13271	Resistant		dasatinib	EC50	HMGA1	-3.34568	0.00306659	-1.08532	-0.0609859	-1.02433	Sensitive
			dasatinib	EC50	CCDC185	3.37765	0.0271634	0.253753	0.014285	17.7635	Resistant		dasatinib	EC50	IFM3	-4.21038	0.000576781	-0.95419	0.922854	-1.87704	Sensitive
			dasatinib	EC50	DNAJC22	3.84863	0.00398232	3.73815	1.56936	2.38196	Resistant		dasatinib	EC50	RTN2	2.78418	0.0149982	1.4953	-0.529071	2.02437	Resistant
			dasatinib	EC50	GP5	-2.7134	0.0310826	0.0200131	0.058598	0.341532	Sensitive		dasatinib	EC50	EFNA1	2.57381	0.0262178	1.14732	-0.117483	1.2648	Resistant
			dasatinib	EC50	C9orf50	3.40499	0.0178191	0.188113	0.0929272	2.0243	Resistant		dasatinib	EC50	DOPD	2.86858	0.0137588	0.514217	-0.505395	1.01961	Resistant
			dasatinib	EC50	FAM133A	4.7791	0.00282495	0.0810971	0.00949994	8.53659	Resistant		dasatinib	EC50	HMGA2	-2.289	0.0326941	-2.20958	-0.557535	-1.65204	Sensitive
			dasatinib	EC50	GPBAR1	5.83555	0.000540369	0.253212	0.110193	2.2979	Resistant		dasatinib	EC50	TM7S3	-2.57362	0.0288035	-0.879031	0.142699	-1.02173	Sensitive
			dasatinib	EC50	TDRP	-2.83987	0.0199009	0.812156	2.7756	0.292606	Sensitive		dasatinib	EC50	APOC2	-4.35333	0.0121254	-1.24136	-0.0165865	-1.22478	Sensitive
			dasatinib	EC50	TMEM64	4.4702	0.00161516	5.57248	1.84963	3.01276	Resistant		dasatinib	EC50	CO057	2.95554	0.0183502	0.351112	-0.668672	1.01978	Resistant
			dasatinib	EC50	CLRN3	2.66245	0.0480819	0.0340611	0.0047851	7.11816	Resistant		dasatinib	EC50	GULP1	-3.90097	0.000825819	-0.772988	0.347089	-1.12008	Sensitive
			dasatinib	EC50	LSMEM1	3.15893	0.0140544	0.689238	0.304251	2.26536	Resistant		dasatinib	EC50	ZDHC7	3.60161	0.00485777	1.37035	0.320847	1.04951	Resistant
			dasatinib	EC50	CFAP65	5.48862	0.000396814	0.0867479	0.0425768	2.03745	Resistant		dasatinib	EC50	LEG9C	-3.20742	0.00617246	-0.822115	0.980409	-1.80252	Sensitive
			dasatinib	EC50	GPR88	2.71628	0.024535	0.0200408	0.00717764	2.79212	Resistant		dasatinib	EC50	LEG9	-3.0155	0.0180977	-1.86637	0.488396	-2.35476	Sensitive
			dasatinib	EC50	PLCB1	4.1632	0.00616079	3.47977	0.806481	4.31476	Resistant		dasatinib	EC50	GTSF1	-3.59845	0.00845564	-1.06593	1.76838	-2.83431	Sensitive
			dasatinib	EC50	HCAR2	-2.7842	0.0382266	0.305216	3.01904	0.101097	Sensitive		dasatinib	EC50	GI24	-3.32097	0.00734502	-1.76225	0.886169	-2.64842	Sensitive
			dasatinib	EC50	OTOP3	-2.68834	0.0426419	0.00574212	0.108512	0.0529168	Sensitive		dasatinib	EC50	S35G2	-5.19759	0.0138363	-0.918728	0.607815	-1.52654	Sensitive
			dasatinib	EC50	SLC25A21	3.43106	0.0089373	1.68088	0.753741	2.23005	Resistant		dasatinib	EC50	RET7	-3.64084	0.0031722	-0.485257	1.01662	-1.50187	Sensitive
			dasatinib	EC50	BEGAIN	3.72551	0.00750908	1.75747	0.433984	4.04961	Resistant		dasatinib	EC50	DYLT3	2.1198	0.0479712	0.646787	-0.420463	1.06725	Resistant
			dasatinib	EC50	GJD3	2.42639	0.0496116	2.06809	0.922878	2.24091	Resistant		dasatinib	EC50	ATOX1	2.25697	0.0402615	0.69816	-0.413566	1.11173	Resistant
			dasatinib	EC50	PMCH	-2.57052	0.036842	0.01982	0.0985272	0.201162	Sensitive		dasatinib	EC50	B2MG	-2.68335	0.0199548	-0.760032	0.812729	-1.57276	Sensitive
			dasatinib	EC50	KLRC4	-3.56385	0.0063014	0.0140779	0.0837448	0.168104	Sensitive		dasatinib	EC50	CKLF7	-3.58192	0.0136447	-1.74651	0.311925	-2.05843	Sensitive
			dasatinib	EC50	H3C13	2.80036	0.0347322	2.85276	0.770648	3.70177	Resistant		dasatinib	EC50	MGST1	-2.15006	0.0482085	-0.392331	1.0361	-1.42843	Sensitive
			dasatinib	EC50	RP1L1	-3.51023	0.0104676	0.0699941	0.219768	0.318491	Sensitive		dasatinib	EC50	MDFIC	-2.47981	0.0498846	-1.18445	-0.0749423	-1.10951	Sensitive
			dasatinib	EC50	SDR42E2	-2.93886	0.0244584	0.0200408	0.0494784	0.405042	Sensitive		dasatinib	EC50	CLD11	-2.56811	0.0342449	-1.17728	1.07896	-2.25624	Sensitive
			dasatinib	EC50	ADRA2C	2.30041	0.0498915	2.22748	0.635404	3.50562	Resistant		dasatinib	EC50	RN5A	3.01407	0.00995264	1.2571	-0.141661	1.39876	Resistant
			dasatinib	EC50	GOLGA6L4	2.59711	0.0296951	2.03422	0.959054	2.12107	Resistant		dasatinib	EC50	J3KN01	-2.29233	0.0415661	-0.921138	0.356634	-1.27777	Sensitive
			dasatinib	EC50	C5orf47	5.01865	0.00217902	0.0369865	0.0047851	7.72953	Resistant		dasatinib	EC50	KLF12	-2.7625	0.0476341	-0.70396	0.378253	-1.08221	Sensitive
			dasatinib	EC50	PPIL6	-3.79789	0.00560636	0.510542	1.19306	0.427927	Sensitive		dasatinib	EC50	KLF5	-2.68762	0.0181714	-1.22104	0.716342	-1.93738	Sensitive
			dasatinib	EC50	IL3RA	-3.02493	0.0291818	0.0621058	0.398801	0.155731	Sensitive		dasatinib	EC50	ZN274	-2.93863	0.0334974	-0.0872358	1.54962	-1.63685	Sensitive
			dasatinib	EC50	RGPD2	5.24467	0.0024325	2.12125	0.287167	7.3868	Resistant		dasatinib	EC50	ZN268	-3.46715	0.0142787	-0.851562	0.170126	-1.02169	Sensitive
			dasatinib	EC50	PRKG1	3.10179	0.0135664	1.98162	0.675468	2.93371	Resistant		dasatinib	IC50	MMP14	-6.8096	9.73043e-06	-1.3071	0.885245	-2.19235	Sensitive
			dasatinib	EC50	SHC4	4.99514	0.00560227	1.20044	0.21442	5.59857	Resistant		dasatinib	IC50	HYPK	3.13102	0.00781158	0.341719	-0.768565	1.11028	Resistant
			dasatinib	EC50	SYN3	3.03873	0.0235629	0.496496	0.157135	3.15968	Resistant		dasatinib	IC50	CTNA2	-2.48227	0.0289592	-0.385866	0.873658	-1.25952	Sensitive
			dasatinib	EC50	ADAMTSL5	-2.48595	0.0474942	1.2205	2.45826	0.496489	Sensitive		dasatinib	IC50	AL1A1	-2.31702	0.0456785	-1.70303	-0.54387	-1.15916	Sensitive
			dasatinib	EC50	NAT8L	2.6236	0.0364235	1.80203	0.766368	2.35139	Resistant		dasatinib	IC50	MYO1B	-2.48583	0.0263125	-0.246216	0.95429	-1.20051	Sensitive
			dasatinib	EC50	NPAP1	-2.74312	0.040641	0	0.0143081	0	Sensitive		dasatinib	IC50	STMN4	2.40004	0.0321389	0.72604	-0.368541	1.09458	Resistant
			dasatinib	EC50	THNSL1	2.45461	0.0414691	2.63267	1.14464	2.30001	Resistant		dasatinib	IC50	STMN2	3.33571	0.00491286	0.679565	-0.556481	1.23605	Resistant
			dasatinib	EC50	DLEU7	4.15576	0.011899	0.0890708	0.0143317	6.21494	Resistant		dasatinib	IC50	FA89A	-2.93665	0.0176713	-0.677596	0.718167	-1.39576	Sensitive
			dasatinib	EC50	TEX38	3.25345	0.011274	0.192811	0.0647236	2.97899	Resistant		dasatinib	IC50	EFNB1	-3.23287	0.00602263	-0.838722	0.673038	-1.51176	Sensitive
			dasatinib	EC50	CYP4F12	-2.9939	0.0269427	0.41875	2.39244	0.175031	Sensitive		dasatinib	IC50	CTND1	-2.44983	0.0289724	-0.081845	0.958317	-1.04016	Sensitive
			dasatinib	EC50	NUDT17	4.0481	0.00646676	2.80883	1.28156	2.19173	Resistant		dasatinib	IC50	CTND1	-2.62709	0.0200361	-0.0672472	1.37572	-1.44297	Sensitive
			dasatinib	EC50	FSCN2	3.83171	0.00401739	1.56059	0.584302	2.67087	Resistant		dasatinib	IC50	NFIP2	-3.21898	0.0297359	-0.290538	1.49245	-1.78299	Sensitive
			dasatinib	EC50	KANK3	-4.23315	0.00234249	0.455226	1.85064	0.245983	Sensitive		dasatinib	IC50	ERN2	-2.7237	0.0444553	-0.84158	0.267782	-1.10936	Sensitive
			dasatinib	EC50	ACTL7A	5.47064	0.000621364	0.0398293	0.00954662	4.17208	Resistant		dasatinib	IC50	CAND2	2.54245	0.0286039	0.619123	-0.413652	1.03278	Resistant
			dasatinib	EC50	PCDHB13	2.77531	0.0472756	1.98881	0.250797	7.92997	Resistant		dasatinib	IC50	CAND1	3.571	0.00321523	0.7092	-0.419038	1.12824	Resistant
			dasatinib	EC50	H1.6	3.66413	0.020383	0.288707	0.00943059	30.6138	Resistant		dasatinib	IC50	LRC8B	6.73384	0.00668705	-0.0093372	-1.24876	1.23943	Resistant
			dasatinib	EC50	H2AP	4.65434	0.00148188	0.121474	0.0185052	6.56434	Resistant		dasatinib	IC50	SYNPO	-4.70518	0.00077293	-0.885108	0.403546	-1.28865	Sensitive
			dasatinib	EC50	RGPD1	3.85001	0.017727	1.84818	0.12359	14.9541	Resistant		dasatinib	IC50	SYNPO	-3.13194	0.0109648	-0.822315	0.389089	-1.2114	Sensitive
			dasatinib	EC50	TMEM72	5	0.00410472	0.0143553	0.00239255	6	Resistant		dasatinib	IC50	SSFA2	-4.13024	0.00102012	-0.495816	0.900687	-1.3965	Sensitive
			dasatinib	EC50	LDLRAD2	-4.3707	0.00256554	0.355575	1.3311	0.267128	Sensitive		dasatinib	IC50	HD	2.86007	0.0126325	0.654708	-0.384851	1.03956	Resistant
			dasatinib	EC50	TMEM221	-2.76176	0.0270605	0.171878	0.600956	0.286008	Sensitive		dasatinib	IC50	AGRIN	-3.52198	0.00500947	0.0431817	1.24557	-1.20238	Sensitive
			dasatinib	EC50	PAQR9	-3.88857	0.00547746	0.0170588	0.105861	0.161143	Sensitive		dasatinib	IC50	PALM	-3.65338	0.00275789	0.173986	1.59719	-1.42321	Sensitive
			dasatinib	EC50	BCL2L15	2.64768	0.0272934	0.643203	0.274761	2.34096	Resistant		dasatinib	IC50	DHX58	4.14749	0.0254653	0.49975	-0.690471	1.19022	Resistant
			dasatinib	EC50	FAM78B	4.69909	0.00203651	0.129502	0.0350531	3.69446	Resistant		dasatinib	IC50	6PGL	2.73537	0.0187811	0.622165	-0.566767	1.18893	Resistant
			dasatinib	EC50	ZNF563	-3.10752	0.0126018	0.894269	1.82183	0.490864	Sensitive		dasatinib	IC50	TEN3	3.40778	0.0144469	0.690414	-1.25621	1.94662	Resistant
			dasatinib	EC50	ASTL	2.70304	0.02584	0.438915	0.120121	3.65394	Resistant		dasatinib	IC50	MISP	-2.45544	0.0277925	-0.424106	1.24653	-1.67064	Sensitive
			dasatinib	EC50	NYX	-3.16228	0.025031	0	0.00957019	0	Sensitive		dasatinib	IC50	WBP2	2.96145	0.0103121	0.720982	-0.340694	1.06168	Resistant
			dasatinib	EC50	HLA.DRB1	3.16641	0.0189617	3.98562	1.85395	2.1498	Resistant		dasatinib	IC50	UAP1L	2.51622	0.0290809	0.774602	-0.792324	1.56693	Resistant
			dasatinib	EC50	SERPINA3	3.14573	0.0184051	7.92747	2.50825	3.16056	Resistant		dasatinib	IC50	ADK	8.4915	7.15647e-07	1.04469	-0.268488	1.31318	Resistant
			dasatinib	EC50	ZNF781	-2.97532	0.0274059	0.101229	0.850653	0.119001	Sensitive		dasatinib	IC50	LAMA3	-2.32726	0.0499263	-0.676096	0.953867	-1.62996	Sensitive
			dasatinib	EC50	THEM5	3.46992	0.010606	0.317921	0.0978974	3.24749	Resistant		dasatinib	IC50	LAMA5	-4.46197	0.000880023	0.0963199	1.40879	-1.31247	Sensitive
			dasatinib	EC50	NBPF4	3.56276	0.00946519	1.79268	0.454775	3.9419	Resistant		dasatinib	IC50	B8ZZW7	2.54003	0.0248377	0.221112	-0.927702	1.14881	Resistant
			dasatinib	EC50	DAPK1	-2.68882	0.0267054	1.22934	3.58343	0.343062	Sensitive		dasatinib	IC50	COT2	-2.30274	0.0456979	0.231342	1.57003	-1.33869	Sensitive
			dasatinib	EC50	CRACDL	-3.90377	0.00554607	1.23437	3.3782	0.365391	Sensitive		dasatinib	IC50	TAGL2	3.33566	0.00518393	0.617817	-0.564291	1.18211	Resistant
			dasatinib	EC50	ADAM32	6.23296	0.000154517	1.48021	0.26099	5.67153	Resistant		dasatinib	IC50	TNAP2	-3.15246	0.00708425	-0.161552	1.46205	-1.6236	Sensitive
			dasatinib	EC50	H3C12	2.63573	0.0382411	1.50776	0.46533	3.24019	Resistant		dasatinib	IC50	LAMB3	-5.15084	0.000379448	-0.974203	1.53923	-2.51343	Sensitive
			dasatinib	EC50	CYP2F1	-3.26004	0.0221382	0.0114842	0.147562	0.0778266	Sensitive		dasatinib	IC50	ZN131	-4.61027	0.00207109	-0.641508	0.732705	-1.37421	Sensitive
			dasatinib	EC50	ELANE	-4.50406	0.00163718	0.0283744	0.119446	0.237551	Sensitive		dasatinib	IC50	ACSS3	-3.06689	0.0119463	-0.860826	1.26702	-2.12784	Sensitive
			dasatinib	EC50	ZNF615	-2.88206	0.0284969	1.24579	2.5757	0.48367	Sensitive		dasatinib	IC50	FAS	3.07522	0.0104059	0.965113	-0.632473	1.59759	Resistant
			dasatinib	EC50	KLHL14	6.27997	0.000200706	0.0257264	0.00239255	10.7527	Resistant		dasatinib	IC50	FNBP1	3.00239	0.0104966	0.63905	-0.376201	1.01525	Resistant
			dasatinib	EC50	RPE	1.52237	0.202394	0.112874	0.0119627	9.43545	Resistant		dasatinib	IC50	CQ096	-6.6545	0.00301735	-1.68766	-0.467791	-1.21986	Sensitive
			dasatinib	EC50	RPS6KL1	2.6714	0.0307169	3.80678	1.84559	2.06264	Resistant		dasatinib	IC50	GALT5	-6.02286	0.000150002	-0.989875	0.584005	-1.57388	Sensitive
			dasatinib	EC50	B3GNT6	3.07783	0.0360589	0.0990252	0.0047851	20.6945	Resistant		dasatinib	IC50	B4DXK4	-6.84299	0.000910518	-1.50018	4.9911	-6.49128	Sensitive
			dasatinib	EC50	HLA.DRB5	5.1548	0.000678806	2.9706	0.777159	3.82239	Resistant		dasatinib	IC50	ARSE	-3.75323	0.00531522	-0.66994	1.15383	-1.82377	Sensitive
			dasatinib	EC50	PLN	-3.16228	0.025031	0	0.00957019	0	Sensitive		dasatinib	IC50	TAU	2.60885	0.0367626	0.964892	-0.995451	1.96034	Resistant
			dasatinib	EC50	DLL1	-2.45679	0.047947	0.970429	2.65898	0.364963	Sensitive		dasatinib	IC50	TAU	4.47673	0.00473597	3.58718	-1.82981	5.41698	Resistant
			dasatinib	EC50	TEX45	-2.55453	0.0483264	0.685811	1.37664	0.498177	Sensitive		dasatinib	IC50	AL3A1	-3.74925	0.00444199	-1.57186	0.4125	-1.98436	Sensitive
			dasatinib	EC50	LRRTM3	4	0.0161301	0.0114842	0	Inf	Resistant		dasatinib	IC50	AL3B1	-2.95598	0.0120954	-0.483442	1.06893	-1.55237	Sensitive
			dasatinib	EC50	BRINP2	5.86954	0.000913494	1.59057	0.219358	7.25102	Resistant		dasatinib	IC50	AL3A2	-3.70557	0.00254555	-0.46044	0.603607	-1.06405	Sensitive
			dasatinib	EC50	L1CAM	2.46033	0.0380345	6.06253	2.96318	2.04595	Resistant		dasatinib	IC50	H14	-3.31375	0.0139346	-0.275021	0.953904	-1.22892	Sensitive
			dasatinib	EC50	GPRASP1	4.11704	0.00310423	1.34008	0.482254	2.77879	Resistant		dasatinib	IC50	PPR3D	3.14393	0.00824187	0.865761	-0.153928	1.01969	Resistant
			dasatinib	EC50	TRPC5OS	2.68765	0.0370598	0.0454322	0.0189536	2.39702	Resistant		dasatinib	IC50	DHAK	3.76879	0.00255267	0.469752	-0.737165	1.20692	Resistant
			dasatinib	EC50	TCEAL6	2.67393	0.0305953	0.0370143	0.016654	2.22254	Resistant		dasatinib	IC50	GNPI2	4.06518	0.00231091	0.915067	-0.777508	1.69258	Resistant
			dasatinib	EC50	CHIC1	2.9919	0.0160547	1.82046	0.86687	2.10004	Resistant		dasatinib	IC50	HMGN5	2.23171	0.0432482	0.687191	-0.892681	1.57987	Resistant
			dasatinib	EC50	VWA7	2.82265	0.0242376	2.8061	1.24025	2.26254	Resistant		dasatinib	IC50	GAK	4.34025	0.000679166	0.59564	-0.666497	1.26214	Resistant
			dasatinib	EC50	PRR3	2.11611	0.0766909	0.0424544	0.014285	2.97195	Resistant		dasatinib	IC50	FLNB	-2.57958	0.0327621	-0.0964723	2.58298	-2.67945	Sensitive
			dasatinib	EC50	LRRC10B	2.80367	0.024295	1.16657	0.342321	3.40783	Resistant		dasatinib	IC50	PGBM	-2.81154	0.014886	-0.620975	0.490822	-1.1118	Sensitive
			dasatinib	EC50	PCDHA2	2.8292	0.043417	0.808407	0.104707	7.72063	Resistant		dasatinib	IC50	IRGQ	3.75349	0.00284364	0.516344	-0.58858	1.10492	Resistant
			dasatinib	EC50	AARD	3.75534	0.00648428	5.57375	1.86262	2.99242	Resistant		dasatinib	IC50	BRAF	3.17628	0.00678621	0.556319	-0.446463	1.00278	Resistant
			dasatinib	EC50	PKHD1L1	-2.93888	0.031991	0.069917	0.932789	0.0749548	Sensitive		dasatinib	IC50	GNAI1	-2.3484	0.0447292	-0.186628	0.825708	-1.01234	Sensitive
			dasatinib	EC50	ARID3C	-3.32419	0.0149394	0.0615993	0.135125	0.455869	Sensitive		dasatinib	IC50	GNA15	-4.36382	0.00720351	-1.60574	1.60987	-3.21561	Sensitive
			dasatinib	EC50	SPDYE2	5.56427	0.000368172	0.723591	0.347496	2.0823	Resistant		dasatinib	IC50	APT	5.18731	0.000214106	0.541722	-0.49502	1.03674	Resistant
			dasatinib	EC50	INSYN1	2.31471	0.0461328	2.24227	0.69944	3.20581	Resistant		dasatinib	IC50	K1549	-2.82143	0.0257335	-0.365366	0.681652	-1.04702	Sensitive
			dasatinib	EC50	EXOC3L4	-3.95463	0.0091396	0.426461	2.565	0.166262	Sensitive		dasatinib	IC50	MATN2	-2.46007	0.0399778	-0.0505356	1.12663	-1.17717	Sensitive
			dasatinib	EC50	KRTAP5.1	-1.58114	0.174688	0	0.00952305	0	Sensitive		dasatinib	IC50	PA1B3	3.00438	0.00950401	0.845843	-0.517828	1.36367	Resistant
			dasatinib	EC50	SERPINB11	-2.74752	0.0404292	0	0.0283842	0	Sensitive		dasatinib	IC50	PDLI1	-3.68396	0.00369774	-0.597635	1.1238	-1.72143	Sensitive
			dasatinib	EC50	ELOA2	2.76204	0.0358195	0.0397749	0.0190932	2.08319	Resistant		dasatinib	IC50	LRP5	-4.72497	0.000718895	-0.299243	1.1603	-1.45954	Sensitive
			dasatinib	EC50	DIO1	-3.07099	0.0136005	0.0743089	0.241708	0.307432	Sensitive		dasatinib	IC50	RASL1	-3.14399	0.0167085	-0.767034	0.89841	-1.66544	Sensitive
			dasatinib	EC50	GPC2	2.74508	0.0262704	2.60153	1.24241	2.09394	Resistant		dasatinib	IC50	SNPC5	6.72304	0.0214161	0.0979022	-1.06269	1.16059	Resistant
			dasatinib	EC50	CEACAM16	-2.71733	0.041908	0	0.0933153	0	Sensitive		dasatinib	IC50	SPTN1	-3.01425	0.0110541	-0.557238	0.591502	-1.14874	Sensitive
			dasatinib	EC50	COLCA2	-3.26939	0.0140947	0.406941	2.19	0.185818	Sensitive		dasatinib	IC50	SPTN1	-5.25538	0.000266141	-0.829219	0.599166	-1.42838	Sensitive
			dasatinib	EC50	NPIPA8	-4.39	0.0047201	0.608941	3.78617	0.160833	Sensitive		dasatinib	IC50	MAGB4	-32.0665	0.0198467	-0.675065	1.83178	-2.50685	Sensitive
			dasatinib	EC50	CRPPA	-2.83996	0.0232708	0.751252	1.52573	0.49239	Sensitive		dasatinib	IC50	DNHD1	3.74278	0.0138364	0.288842	-1.3601	1.64894	Resistant
			dasatinib	EC50	MSMP	3.06307	0.0242762	0.138281	0.0162685	8.49996	Resistant		dasatinib	IC50	NHRF1	3.06684	0.018476	1.39027	-0.366731	1.757	Resistant
			dasatinib	EC50	C5orf49	2.60222	0.0363058	0.898079	0.279419	3.2141	Resistant		dasatinib	IC50	TNI3K	3.80437	0.00519675	0.63576	-0.874613	1.51037	Resistant
			dasatinib	EC50	RSC1A1	2.70524	0.0244376	1.09748	0.371703	2.95257	Resistant		dasatinib	IC50	DCTP1	3.14205	0.00877947	0.557833	-0.569105	1.12694	Resistant
			dasatinib	EC50	ATAD3C	-2.85082	0.0193137	1.02776	2.39904	0.428403	Sensitive		dasatinib	IC50	MSLN	-2.41414	0.0301702	-0.237511	2.13855	-2.37606	Sensitive
			dasatinib	EC50	TAFA5	2.57772	0.0334812	0.556308	0.186414	2.98426	Resistant		dasatinib	IC50	MOCS3	4.29313	0.00111978	0.439039	-0.724801	1.16384	Resistant
			dasatinib	EC50	HEPN1	3.21468	0.032444	0.0171698	0	Inf	Resistant		dasatinib	IC50	CTR1	-3.02754	0.00937194	-0.478579	0.532056	-1.01063	Sensitive
			dasatinib	EC50	XKR9	3.27108	0.0124735	1.42699	0.621883	2.29463	Resistant		dasatinib	IC50	RHOF	-2.94409	0.0118186	-0.751684	0.470586	-1.22227	Sensitive
			dasatinib	EC50	BTBD19	2.52046	0.0361197	0.903887	0.373006	2.42325	Resistant		dasatinib	IC50	MK09	2.8371	0.0159933	0.709169	-0.410164	1.11933	Resistant
			dasatinib	EC50	PVALEF	3.45315	0.0145303	0.192355	0.0560857	3.42966	Resistant		dasatinib	IC50	RAI14	-2.764	0.0176856	0.0114651	1.0942	-1.08274	Sensitive
			dasatinib	EC50	C2CD4D	2.58352	0.0329352	0.623636	0.271077	2.30058	Resistant		dasatinib	IC50	LY75	-3.22916	0.0108988	-0.92341	0.571728	-1.49514	Sensitive
			dasatinib	EC50	TAS2R46	-3.36513	0.0218083	0.0365799	0.0998055	0.366512	Sensitive		dasatinib	IC50	ICAM5	-2.72196	0.0294673	-0.490146	1.13929	-1.62944	Sensitive
			dasatinib	EC50	KLLN	4.1253	0.0090373	0.785725	0.355433	2.21061	Resistant		dasatinib	IC50	ATP23	2.62757	0.0313388	0.852633	-0.875179	1.72781	Resistant
			dasatinib	EC50	TMEM253	-2.89314	0.032396	0.23573	0.64953	0.362924	Sensitive		dasatinib	IC50	MK03	3.40831	0.00427425	0.642199	-0.35961	1.00181	Resistant
			dasatinib	EC50	RTL5	4.21487	0.0060686	1.42224	0.557702	2.55018	Resistant		dasatinib	IC50	TTYH3	-2.15895	0.0488473	-0.229867	0.906959	-1.13683	Sensitive
			dasatinib	EC50	STRC	-2.7677	0.0258797	0.321733	0.842721	0.381778	Sensitive		dasatinib	IC50	MST4	5.54394	7.71867e-05	0.413756	-0.716311	1.13007	Resistant
			dasatinib	EC50	C4orf48	3.40919	0.00785988	4.61952	1.69124	2.73144	Resistant		dasatinib	IC50	SHRM3	-2.50999	0.0310418	-0.0832727	1.3929	-1.47617	Sensitive
			dasatinib	EC50	UPK3B	-3.08638	0.02033	1.59343	3.78858	0.420587	Sensitive		dasatinib	IC50	IPYR	3.75342	0.00254752	0.556549	-0.6028	1.15935	Resistant
			dasatinib	EC50	OR5V1	3.21468	0.032444	0.0171698	0	Inf	Resistant		dasatinib	IC50	RILP	-3.55689	0.0314857	0.0381497	1.8648	-1.82665	Sensitive
			dasatinib	EC50	KRTAP5.7	2.6941	0.0435084	0.175998	0.0445381	3.95163	Resistant		dasatinib	IC50	ERF3A	3.87076	0.00186503	0.358475	-0.761068	1.11954	Resistant
			dasatinib	EC50	USP51	4.07749	0.00951268	0.944127	0.263486	3.58322	Resistant		dasatinib	IC50	SG223	-3.34815	0.00714677	-0.0876199	1.11004	-1.19766	Sensitive
			dasatinib	EC50	ECSCR	-2.99182	0.0303836	0	0.0237378	0	Sensitive		dasatinib	IC50	SON	-9.18967	0.0116351	-0.846765	0.667426	-1.51419	Sensitive
			dasatinib	EC50	PCDHGA10	3.20418	0.0257713	0.402584	0.136494	2.94946	Resistant		dasatinib	IC50	A8MUP8	4348.1	0.000146413	2.47335	-0.215947	2.6893	Resistant
			dasatinib	EC50	KRTAP5.9	2.62725	0.0351773	0.179862	0.0765197	2.35053	Resistant		dasatinib	IC50	MBNL2	-19.0349	0.000316608	-0.269644	1.89657	-2.16621	Sensitive
			dasatinib	EC50	TAS2R43	5.21144	0.000589037	0.165743	0.0349361	4.74417	Resistant		dasatinib	IC50	1A24	-2.49525	0.0288853	-2.05133	1.45664	-3.50797	Sensitive
			dasatinib	EC50	HCAR3	-3.80979	0.00976811	0.211556	1.29652	0.163172	Sensitive		dasatinib	IC50	1A25	-3.57164	0.0033246	-1.09393	2.02894	-3.12288	Sensitive
			dasatinib	EC50	NEDD8.MDP1	-4.18758	0.00337458	0.308944	1.41495	0.218343	Sensitive		dasatinib	IC50	1A68	-2.33409	0.0393997	-1.02824	1.88212	-2.91036	Sensitive
			dasatinib	EC50	PPIAL4D	2.66702	0.034724	0.0834568	0.0188612	4.4248	Resistant		dasatinib	IC50	1B45	-3.45222	0.00453174	-0.855364	0.990757	-1.84612	Sensitive
			dasatinib	EC50	OR13A1	-2.65326	0.045249	0	0.058064	0	Sensitive		dasatinib	IC50	1C17	-2.96214	0.0123416	-0.3673	1.27248	-1.63978	Sensitive
			dasatinib	EC50	CCDC187	-2.97119	0.0236034	0.0734574	0.432358	0.1699	Sensitive		dasatinib	IC50	1C02	-2.4357	0.0448475	-0.770077	1.94496	-2.71503	Sensitive
			dasatinib	EC50	EDDM13	2.72696	0.0238424	0.293507	0.121018	2.42532	Resistant		dasatinib	IC50	HLAF	-3.0959	0.00995924	-0.41245	0.913757	-1.32621	Sensitive
			dasatinib	EC50	ERVV.1	-2.83848	0.0289878	0.00571383	0.0560943	0.101861	Sensitive		dasatinib	IC50	TIGAR	2.64466	0.0209857	0.108876	-0.997378	1.10625	Resistant
			dasatinib	EC50	COMMD3.BMI1	3.03587	0.0290441	0.363851	0.0356875	10.1955	Resistant		dasatinib	IC50	TBCE	3.13776	0.00732326	0.529804	-0.63736	1.16716	Resistant
			dasatinib	EC50	SMIM32	5.94676	0.000557644	0.221383	0.0601408	3.68107	Resistant		dasatinib	IC50	TNIP2	2.74889	0.0470663	1.37077	-0.794435	2.1652	Resistant
			dasatinib	EC50	FAM47E.STBD1	4.77009	0.00178545	0.920771	0.282199	3.26284	Resistant		dasatinib	IC50	IKZF1	-3.81075	0.0114174	-2.30997	-1.0277	-1.28227	Sensitive
			dasatinib	EC50	TPTE	2.13555	0.0995845	0.0393678	0	Inf	Resistant		dasatinib	IC50	MOC2B	2.88093	0.0130614	0.946324	-0.316651	1.26297	Resistant
			dasatinib	EC50	H4C6	3.14321	0.0347402	0.169754	0	Inf	Resistant		dasatinib	IC50	KPBB	3.91153	0.00201601	0.750518	-0.27307	1.02359	Resistant
			dasatinib	EC50	RIMBP3	1.50656	0.174803	0.206865	0.0753687	2.74471	Resistant		dasatinib	IC50	K121L	-2.74796	0.0391509	-0.450488	1.48122	-1.93171	Sensitive
			dasatinib	EC50	HNRNPCL3	3.22929	0.0319972	0.0506834	0	Inf	Resistant		dasatinib	IC50	FOCAD	2.42457	0.029647	0.399269	-0.628034	1.0273	Resistant
			dasatinib	EC50	H2AB3	3.33817	0.0107114	0.516352	0.167287	3.08662	Resistant		dasatinib	IC50	MYOF	-2.48977	0.0282038	0.237383	1.51497	-1.27759	Sensitive
			dasatinib	EC50	H2AB2	3.33817	0.0107114	0.516352	0.167287	3.08662	Resistant		dasatinib	IC50	DYSF	-3.34943	0.00616715	-0.141512	1.21401	-1.35552	Sensitive
			dasatinib	EC50	OR4F29	3.07224	0.013889	0.0228836	0.00476152	4.80594	Resistant		dasatinib	IC50	G3V1L9	-5.19674	0.000135612	-0.746369	0.611902	-1.35827	Sensitive
			dasatinib	IC50	ENPP4	3.57136	0.0374296	3.1576	1.25285	2.52033	Resistant		dasatinib	IC50	DPOLB	3.35527	0.0109475	0.582781	-0.442287	1.02507	Resistant
			dasatinib	IC50	KLHL13	-10.0695	0.000558216	0.871393	2.98999	0.291437	Sensitive		dasatinib	IC50	DSG2	-2.34557	0.0342994	-0.17496	0.953127	-1.12809	Sensitive
			dasatinib	IC50	MTMR7	4.17434	0.0183435	0.796368	0.331196	2.40452	Resistant		dasatinib	IC50	SREC2	-3.96377	0.00926565	-0.817824	1.16219	-1.98002	Sensitive
			dasatinib	IC50	YBX2	5.05438	0.0072619	4.93935	1.8206	2.71304	Resistant		dasatinib	IC50	AAGAB	3.08217	0.00811822	0.317224	-0.725819	1.04304	Resistant
			dasatinib	IC50	ADAM22	5.04429	0.0111336	2.06278	0.570126	3.61811	Resistant		dasatinib	IC50	GFOD1	-4.77636	0.0128779	-0.346119	1.03111	-1.37723	Sensitive
			dasatinib	IC50	PAX7	-8.08926	0.0149405	0	0.0379526	0	Sensitive		dasatinib	IC50	SC23B	3.86524	0.00173843	0.903536	-0.118162	1.0217	Resistant
			dasatinib	IC50	IL20RA	-7.78097	0.0014718	0.567981	4.20944	0.13493	Sensitive		dasatinib	IC50	FAT1	-2.51521	0.0260752	-0.359762	0.853361	-1.21312	Sensitive
			dasatinib	IC50	SYT13	7.75919	0.0136915	0.899977	0.0517113	17.4039	Resistant		dasatinib	IC50	2B1B	-5.78702	0.0285858	-1.86468	2.7	-4.56468	Sensitive
			dasatinib	IC50	CHRDL2	4.26327	0.0131788	0.12852	0.0188612	6.81402	Resistant		dasatinib	IC50	RAB3I	2.47397	0.0408038	0.872209	-0.523315	1.39552	Resistant
			dasatinib	IC50	ZNF280C	4.62688	0.0423813	2.13309	0.985166	2.16521	Resistant		dasatinib	IC50	KI67	-3.25541	0.00617988	-0.657855	0.74215	-1.40001	Sensitive
			dasatinib	IC50	DGAT2	4.75215	0.0225657	3.91772	1.39909	2.80019	Resistant		dasatinib	IC50	DHRS3	-2.49306	0.0265422	-0.636037	0.839411	-1.47545	Sensitive
			dasatinib	IC50	ANKRD44	2.78933	0.0493931	1.55272	0.487958	3.18207	Resistant		dasatinib	IC50	MADD	-8.46876	0.0136581	0.518471	1.84783	-1.32935	Sensitive
			dasatinib	IC50	ZMYND12	3.44031	0.0402561	0.545345	0.253891	2.14795	Resistant		dasatinib	IC50	TRPC1	-4.36953	0.0437945	-0.718278	0.657442	-1.37572	Sensitive
			dasatinib	IC50	FGF22	-6.28766	0.0142417	0.136281	0.414894	0.328471	Sensitive		dasatinib	IC50	ADH1G	-3.73961	0.0346415	-1.13105	-0.0162989	-1.11475	Sensitive
			dasatinib	IC50	TRIB2	7.35195	0.0146563	4.61824	1.97005	2.34422	Resistant		dasatinib	IC50	COIA1	-3.32614	0.00501354	-0.731504	0.842741	-1.57425	Sensitive
			dasatinib	IC50	TIGAR	5.80085	0.0143885	2.39751	0.703602	3.40748	Resistant		dasatinib	IC50	NRG1	-2.61419	0.0369837	-0.938563	1.07007	-2.00864	Sensitive
			dasatinib	IC50	LXN	3.71291	0.0211372	5.5845	0.99559	5.60924	Resistant		dasatinib	IC50	DDHD2	3.20953	0.00838748	0.922582	-0.277306	1.19989	Resistant
			dasatinib	IC50	RAPGEF3	-7.17308	0.00417382	1.03358	5.11828	0.20194	Sensitive		dasatinib	IC50	SEM3D	-7.18071	0.0143148	-0.134826	1.02637	-1.16119	Sensitive
			dasatinib	IC50	DNAAF6	-6.62856	0.00801109	0.00952305	0.079506	0.119778	Sensitive		dasatinib	IC50	EPHA6	-4.45903	0.000541286	-0.190205	0.918174	-1.10838	Sensitive
			dasatinib	IC50	KCNN2	4.17064	0.0442001	0.124047	0.0379526	3.26847	Resistant		dasatinib	IC50	EPHA2	-5.01273	0.000223066	-1.11902	1.06176	-2.18078	Sensitive
			dasatinib	IC50	IGSF9B	3.98597	0.0191968	0.60956	0.232491	2.62186	Resistant		dasatinib	IC50	HMDH	-4.23709	0.00162589	-0.522037	0.600059	-1.1221	Sensitive
			dasatinib	IC50	AP4E1	3.33847	0.0478625	3.37024	1.36635	2.46661	Resistant		dasatinib	IC50	PLEC	-2.31003	0.0378634	-0.141307	1.25945	-1.40076	Sensitive
			dasatinib	IC50	CDH7	-17.9942	0.00168161	0.101671	0.562315	0.180808	Sensitive		dasatinib	IC50	NUDT4	5.72083	0.00130524	0.149832	-1.20317	1.353	Resistant
			dasatinib	IC50	APOB	2.82829	0.0474483	0.0472454	0.00952305	4.96116	Resistant		dasatinib	IC50	PLCB1	4.32421	0.00348929	-0.242072	-1.47999	1.23792	Resistant
			dasatinib	IC50	GCKR	-5.79263	0.0285328	0	0.128395	0	Sensitive		dasatinib	IC50	CO3	-3.23085	0.00653775	-0.349648	0.919808	-1.26946	Sensitive
			dasatinib	IC50	ERO1B	-4.16388	0.0482255	0.534538	2.61097	0.204727	Sensitive		dasatinib	IC50	LMO7	-2.89508	0.0120376	-0.619036	0.790237	-1.40927	Sensitive
			dasatinib	IC50	ACHE	4.74864	0.0271593	0.753999	0.290122	2.59891	Resistant		dasatinib	IC50	H0YDG6	-2.66589	0.0235251	-1.09664	0.81749	-1.91413	Sensitive
			dasatinib	IC50	PHACTR3	-4.48658	0.0193316	0.612324	1.72264	0.355457	Sensitive		dasatinib	IC50	ZN330	3.75428	0.00307393	0.457596	-0.648265	1.10586	Resistant
			dasatinib	IC50	SMOX	4.01998	0.0332775	5.00387	2.4717	2.02447	Resistant		dasatinib	IC50	ABLM2	-2.78813	0.0264471	-0.550794	0.964265	-1.51506	Sensitive
			dasatinib	IC50	SLC7A8	-8.8831	0.000894887	1.44934	4.9242	0.294329	Sensitive		dasatinib	IC50	Q5T6N4	-3.94932	0.00394852	-0.443493	1.07442	-1.51791	Sensitive
			dasatinib	IC50	RPGRIP1	-3.89803	0.0211279	0.175749	0.717997	0.244777	Sensitive		dasatinib	IC50	DEMA	-4.53797	0.001095	-0.939149	0.713226	-1.65238	Sensitive
			dasatinib	IC50	SEMA6A	2.87418	0.0460386	1.50284	0.528546	2.84336	Resistant		dasatinib	IC50	ARRB1	2.40995	0.0372192	0.871567	-0.622857	1.49442	Resistant
			dasatinib	IC50	NRP1	6.26734	0.00364255	4.8706	1.86895	2.60606	Resistant		dasatinib	IC50	FGD3	7.89534	0.00423477	-0.406376	-1.73814	1.33176	Resistant
			dasatinib	IC50	GALNT16	4.07688	0.0172648	1.3059	0.194402	6.71753	Resistant		dasatinib	IC50	ENTP3	-414.641	0.00153535	-0.869677	3.26264	-4.13231	Sensitive
			dasatinib	IC50	BDKRB1	-3.48978	0.0397275	0.550777	1.90533	0.289072	Sensitive		dasatinib	IC50	CP4FB	-3.5986	0.00718759	-1.13662	1.53717	-2.67378	Sensitive
			dasatinib	IC50	NFATC2	6.78371	0.0210275	2.42282	0.0472907	51.2324	Resistant		dasatinib	IC50	CP4FC	-3.2659	0.00890661	-1.25285	0.625411	-1.87826	Sensitive
			dasatinib	IC50	RIMS4	53.8802	7.74584e-05	2.4066	0.0284296	84.6514	Resistant		dasatinib	IC50	MP2K6	3.31319	0.00905714	0.0202413	-1.34304	1.36328	Resistant
			dasatinib	IC50	VSIG1	-5.39493	0.00750185	0.0467517	0.234419	0.199437	Sensitive		dasatinib	IC50	ITB4	-2.42482	0.029447	0.0340637	2.01518	-1.98112	Sensitive
			dasatinib	IC50	PAGE4	-3.05211	0.0379544	0.0414427	0.221191	0.187362	Sensitive		dasatinib	IC50	PTTG	-3.52152	0.00341366	-0.384581	1.14425	-1.52883	Sensitive
			dasatinib	IC50	SCML2	4.92838	0.00936151	2.28213	0.609934	3.74161	Resistant		dasatinib	IC50	STING	-2.3989	0.035531	-0.858011	0.625157	-1.48317	Sensitive
			dasatinib	IC50	CCL22	-4.79891	0.0383263	0.175573	0.728138	0.241125	Sensitive		dasatinib	IC50	ZEB2	3.29563	0.0112508	0.18321	-1.68691	1.87012	Resistant
			dasatinib	IC50	CCL17	-4.58767	0.0431289	0.087197	0.294733	0.295851	Sensitive		dasatinib	IC50	JAG2	-3.255	0.0140041	-0.315526	1.35031	-1.66583	Sensitive
			dasatinib	IC50	AMH	5.87648	0.026527	3.76913	0.746661	5.04797	Resistant		dasatinib	IC50	JAG1	-2.55196	0.0255011	-0.8168	0.809754	-1.62655	Sensitive
			dasatinib	IC50	SCN1B	8.29265	0.00536856	2.36184	0.589602	4.00583	Resistant		dasatinib	IC50	FA83G	-6.91206	0.000361888	-0.0160464	1.51053	-1.52658	Sensitive
			dasatinib	IC50	HOXA13	-4.84955	0.0393521	0.317328	1.49553	0.212184	Sensitive		dasatinib	IC50	LAMC1	-2.58717	0.0275765	-0.262678	0.862214	-1.12489	Sensitive
			dasatinib	IC50	PMP22	3.54577	0.0355018	5.01299	1.98968	2.5195	Resistant		dasatinib	IC50	LAMC2	-3.50284	0.00351745	-0.738755	1.15673	-1.89549	Sensitive
			dasatinib	IC50	CRACD	3.18764	0.0333869	1.71059	0.417734	4.09491	Resistant		dasatinib	IC50	GPAT3	-2.56315	0.0245202	-0.574097	0.863439	-1.43754	Sensitive
			dasatinib	IC50	TECTA	3.96235	0.0176712	0.238055	0.0698723	3.407	Resistant		dasatinib	IC50	NC2A	2.82558	0.0162248	0.462094	-0.596263	1.05836	Resistant
			dasatinib	IC50	CD5	1	0.42265	0.0047851	0	Inf	Resistant		dasatinib	IC50	WNT5B	13.8557	0.0458669	0.584069	-0.436885	1.02095	Resistant
			dasatinib	IC50	POU2AF1	-3.04951	0.0469254	0.0549717	0.3258	0.168728	Sensitive		dasatinib	IC50	PLXD1	-3.71194	0.00393437	-0.593424	0.983181	-1.5766	Sensitive
			dasatinib	IC50	SLC6A12	3.71098	0.0454357	0.370824	0.069859	5.30819	Resistant		dasatinib	IC50	PLXB1	-2.46651	0.0272465	-0.270951	0.986347	-1.2573	Sensitive
			dasatinib	IC50	MGP	6.13464	0.0207544	8.28416	1.06613	7.77029	Resistant		dasatinib	IC50	PNPH	3.22632	0.00779105	0.288548	-0.761106	1.04965	Resistant
			dasatinib	IC50	ARHGDIB	-13.0552	0.00491883	2.22152	7.43457	0.298809	Sensitive		dasatinib	IC50	DGKQ	2.60646	0.0380369	0.453502	-0.773758	1.22726	Resistant
			dasatinib	IC50	BMP5	10.4931	0.00622874	1.10833	0.0234631	47.2372	Resistant		dasatinib	IC50	CA2D1	-6.93848	0.00613931	-0.148457	1.33725	-1.4857	Sensitive
			dasatinib	IC50	RBM24	3.46208	0.0293609	2.18062	0.80482	2.70945	Resistant		dasatinib	IC50	MBD4	-2.73681	0.0488592	-0.507364	0.576314	-1.08368	Sensitive
			dasatinib	IC50	SLC16A10	-5.63753	0.00490644	0.186858	0.930474	0.200821	Sensitive		dasatinib	IC50	GMPR1	-2.33729	0.0369364	-0.646254	0.592578	-1.23883	Sensitive
			dasatinib	IC50	SMOC2	4.76508	0.0413032	1.77233	0.0238312	74.3701	Resistant		dasatinib	IC50	HECW2	4.86249	0.00522783	0.775641	-1.19293	1.96857	Resistant
			dasatinib	IC50	TENT5A	4.03083	0.0394398	3.90812	1.391	2.80957	Resistant		dasatinib	IC50	2023-09-06	3.17675	0.00771857	0.527156	-0.490846	1.018	Resistant
			dasatinib	IC50	CDX1	-4.97044	0.0381744	0.0047851	0.0285692	0.167492	Sensitive		dasatinib	IC50	2023-09-03	2.47478	0.0469104	0.930879	-0.673415	1.60429	Resistant
			dasatinib	IC50	LOXL3	3.83849	0.0189637	2.41563	0.727852	3.31884	Resistant		dasatinib	IC50	INSR	-2.99596	0.00964394	-0.127365	1.00293	-1.1303	Sensitive
			dasatinib	IC50	KCNJ13	-6.51314	0.0214283	0.154098	0.374798	0.411151	Sensitive		dasatinib	IC50	SODC	3.04288	0.00938842	0.351496	-0.671474	1.02297	Resistant
			dasatinib	IC50	WIPF1	9.85209	0.00275221	4.21292	0.450464	9.35241	Resistant		dasatinib	IC50	DCPS	3.56391	0.00388585	0.266363	-1.02507	1.29143	Resistant
			dasatinib	IC50	MARK1	-3.7707	0.0196337	0.846324	2.96793	0.285157	Sensitive		dasatinib	IC50	PALD	2.49245	0.0382595	-0.0424074	-1.3684	1.32599	Resistant
			dasatinib	IC50	APOA1	3.26522	0.0479473	0.49405	0.139571	3.53978	Resistant		dasatinib	IC50	UBE2T	3.41459	0.00735222	0.705628	-0.482246	1.18787	Resistant
			dasatinib	IC50	SLC8A2	-7.80377	0.00671966	0.149084	1.10632	0.134756	Sensitive		dasatinib	IC50	AB17C	-3.42653	0.0262799	-0.664238	0.580751	-1.24499	Sensitive
			dasatinib	IC50	SLC16A7	3.89457	0.0251393	1.74897	0.543022	3.22081	Resistant		dasatinib	IC50	SPB9	-3.08123	0.0141722	-1.30998	1.39435	-2.70433	Sensitive
			dasatinib	IC50	CSF3R	-4.1911	0.0302192	0.0513981	0.353063	0.145578	Sensitive		dasatinib	IC50	AT7L1	-5.09516	0.0111932	-0.688397	0.401331	-1.08973	Sensitive
			dasatinib	IC50	NKX2.3	-8.15324	0.0100025	0.04206	0.979577	0.0429369	Sensitive		dasatinib	IC50	TRBM	-2.92257	0.0178149	-0.941013	1.4429	-2.38391	Sensitive
			dasatinib	IC50	HOXB1	-10.9829	0.00818859	0	0.435438	0	Sensitive		dasatinib	IC50	PHLB2	-2.99864	0.01111	-0.347496	1.17711	-1.5246	Sensitive
			dasatinib	IC50	TP53AIP1	-12.0922	0.00491248	0.0930105	0.79681	0.116729	Sensitive		dasatinib	IC50	PYRG1	2.99068	0.0130702	0.398035	-0.716819	1.11485	Resistant
			dasatinib	IC50	ZRANB3	18.19	6.3365e-05	2.57602	1.12905	2.28158	Resistant		dasatinib	IC50	THTPA	5.13659	0.000251547	0.365477	-0.857215	1.22269	Resistant
			dasatinib	IC50	SASH3	-3.53946	0.0272095	0.0467517	0.171748	0.272211	Sensitive		dasatinib	IC50	SP100	-2.37381	0.0329663	-0.467501	0.605623	-1.07312	Sensitive
			dasatinib	IC50	SLC36A1	5.21384	0.0117065	3.0553	1.10313	2.76966	Resistant		dasatinib	IC50	HMGB3	3.4855	0.00364603	0.575214	-0.794535	1.36975	Resistant
			dasatinib	IC50	ZBP1	5.65486	0.0298776	0.188263	0	Inf	Resistant		dasatinib	IC50	PTK7	-3.88007	0.00692158	-0.489409	1.32525	-1.81466	Sensitive
			dasatinib	IC50	MOCS1	4.14688	0.0488406	2.4547	0.795346	3.08633	Resistant		dasatinib	IC50	BROX	2.71733	0.0236226	0.796129	-0.339058	1.13519	Resistant
			dasatinib	IC50	SH3TC1	-5.5346	0.018834	0.647516	2.21953	0.291736	Sensitive		dasatinib	IC50	H7C2K6	-4.30338	0.0126466	-0.759791	1.96655	-2.72634	Sensitive
			dasatinib	IC50	F10	-8.72005	0.00321111	0.196471	0.565336	0.34753	Sensitive		dasatinib	IC50	MXRA5	-4.39721	0.00230034	-0.723014	1.60966	-2.33267	Sensitive
			dasatinib	IC50	PRKCG	-20.4285	0.000951706	0.0835124	0.687005	0.12156	Sensitive		dasatinib	IC50	P2R3B	7.34262	0.0180474	0.339152	-1.26007	1.59922	Resistant
			dasatinib	IC50	LRRC61	5.69007	0.00518426	3.77372	1.71228	2.20391	Resistant		dasatinib	IC50	UB2L3	3.54106	0.00326596	0.144819	-0.959183	1.104	Resistant
			dasatinib	IC50	GNAZ	4.29539	0.0484642	1.97608	0.653186	3.0253	Resistant		dasatinib	IC50	RAB6B	3.03522	0.0127108	0.315545	-1.1587	1.47424	Resistant
			dasatinib	IC50	MCHR1	-3.25726	0.0344929	0.0236463	0.115132	0.205384	Sensitive		dasatinib	IC50	4F2	-2.61819	0.0230806	-0.641466	0.479145	-1.12061	Sensitive
			dasatinib	IC50	HOXD1	-12.9525	0.0036258	0.0280214	1.49438	0.0187512	Sensitive		dasatinib	IC50	ANR44	2.90061	0.0134466	0.0936651	-0.908037	1.0017	Resistant
			dasatinib	IC50	HOXD3	-73.3289	2.22175e-05	0.0047851	0.968294	0.00494178	Sensitive		dasatinib	IC50	APLP2	-2.5891	0.0291603	0.11741	1.11871	-1.0013	Sensitive
			dasatinib	IC50	CHN1	8.96035	0.0102121	3.8594	0.334237	11.5469	Resistant		dasatinib	IC50	TBX2	2.95631	0.0326187	-0.378646	-2.17049	1.79184	Resistant
			dasatinib	IC50	CALML4	4.66944	0.0421262	4.1539	1.80511	2.30119	Resistant		dasatinib	IC50	A6NF51	3.73777	0.00730947	0.645704	-0.824517	1.47022	Resistant
			dasatinib	IC50	LOXL1	4.8804	0.0378676	3.90685	1.11087	3.51692	Resistant		dasatinib	IC50	B4DPS5	3.21778	0.0102847	0.476449	-0.810685	1.28713	Resistant
			dasatinib	IC50	LRRC6	5.69007	0.00518426	3.77372	1.71228	2.20391	Resistant		dasatinib	IC50	TRFM	-2.68248	0.0187457	-0.883846	0.897055	-1.7809	Sensitive
			dasatinib	IC50	MAP7D3	3.01452	0.0406451	3.97454	1.34292	2.95963	Resistant		dasatinib	IC50	DCAF4	4.39462	0.048076	0.551489	-0.587885	1.13937	Resistant
			dasatinib	IC50	LBP	-4.97044	0.0381744	0.0047851	0.0285692	0.167492	Sensitive		dasatinib	IC50	ZFAN6	3.55814	0.00315453	0.164692	-0.872683	1.03738	Resistant
			dasatinib	IC50	CHSY1	3.56983	0.0311098	4.91495	2.32733	2.11184	Resistant		dasatinib	IC50	TMM51	-4.46317	0.00090977	-0.750462	0.545742	-1.2962	Sensitive
			dasatinib	IC50	RTBDN	-4.0268	0.0431674	0.609597	1.78204	0.342078	Sensitive		dasatinib	IC50	RABE1	3.18452	0.0077845	0.71505	-0.289078	1.00413	Resistant
			dasatinib	IC50	MATN3	7.62998	0.00602459	2.36779	0.552271	4.28738	Resistant		dasatinib	IC50	CCDC8	-2.8259	0.0444178	-0.436833	2.01084	-2.44767	Sensitive
			dasatinib	IC50	ATP1A4	-19.4537	0.000236742	0.0142148	0.587705	0.0241869	Sensitive		dasatinib	IC50	TRPS1	3.6387	0.00342041	2.02126	0.241967	1.77929	Resistant
			dasatinib	IC50	KL	-10.0695	0.000558216	0.871393	2.98999	0.291437	Sensitive		dasatinib	IC50	ARLY	3.69936	0.00350656	0.583453	-0.648948	1.2324	Resistant
			dasatinib	IC50	RNF128	-4.26263	0.014418	0.428019	2.7011	0.158461	Sensitive		dasatinib	IC50	AF1L2	-5.27965	0.000124964	-1.22322	1.496	-2.71922	Sensitive
			dasatinib	IC50	PRAM1	-9.18706	0.000861308	0.136675	0.555207	0.24617	Sensitive		dasatinib	IC50	ITA6	-2.73871	0.0179166	-0.473079	1.38747	-1.86055	Sensitive
			dasatinib	IC50	PDE6B	7.47365	0.0146404	2.73771	0.0630113	43.4479	Resistant		dasatinib	IC50	H7BZ97	-2.91367	0.0157202	-0.548401	0.824067	-1.37247	Sensitive
			dasatinib	IC50	PDZD2	-4.24736	0.0209792	1.07565	3.81006	0.282318	Sensitive		dasatinib	IC50	CAN7	3.49694	0.00382853	0.819217	-0.225791	1.04501	Resistant
			dasatinib	IC50	CAMK1	0.942536	0.424758	0.0649058	0.0284296	2.28304	Resistant		dasatinib	IC50	FKBP4	4.40431	0.0025668	0.843834	-0.462658	1.30649	Resistant
			dasatinib	IC50	DTNA	5.88766	0.024496	3.84872	0.334548	11.5042	Resistant		dasatinib	IC50	PTPA	3.66455	0.00420019	0.753081	-0.604014	1.3571	Resistant
			dasatinib	IC50	DAGLA	3.66572	0.043155	2.43465	0.835297	2.91472	Resistant		dasatinib	IC50	A6PVN8	2.72784	0.0243766	0.647736	-0.367747	1.01548	Resistant
			dasatinib	IC50	GGACT	12.6377	0.00451822	2.0058	0.242303	8.27808	Resistant		dasatinib	IC50	CQ097	2.46038	0.0485941	0.402343	-1.3688	1.77114	Resistant
			dasatinib	IC50	CEMIP2	5.00623	0.00809485	4.81904	2.35459	2.04666	Resistant		dasatinib	IC50	MBOA1	-3.50619	0.00910302	-0.269638	1.55919	-1.82883	Sensitive
			dasatinib	IC50	FAM189A2	8.12023	0.0148084	2.47716	0.0611855	40.4861	Resistant		dasatinib	IC50	HMHA1	-4.6341	0.000513183	-0.724233	0.622869	-1.3471	Sensitive
			dasatinib	IC50	DOCK10	4.07534	0.0228546	2.314	0.967562	2.39158	Resistant		dasatinib	IC50	DBNL	3.69246	0.0024963	0.504093	-0.546228	1.05032	Resistant
			dasatinib	IC50	UGGT1	4.07274	0.0392977	4.93295	2.3328	2.11461	Resistant		dasatinib	IC50	DBNL	2.73369	0.018489	0.486836	-0.669064	1.1559	Resistant
			dasatinib	IC50	WDR38	-7.30229	0.00191867	0.0188612	0.222101	0.0849217	Sensitive		dasatinib	IC50	CD37L	4.11167	0.00105785	0.484202	-0.58686	1.07106	Resistant
			dasatinib	IC50	IL33	-3.53516	0.0241338	0.00957019	0.0332609	0.287731	Sensitive		dasatinib	IC50	IF2B3	-2.51803	0.0337547	-0.960891	0.483055	-1.44395	Sensitive
			dasatinib	IC50	C6orf52	3.3597	0.0289168	2.17014	0.49468	4.38695	Resistant		dasatinib	IC50	IF2B2	-3.32587	0.00985247	-1.07683	0.347242	-1.42407	Sensitive
			dasatinib	IC50	TMPRSS4	-4.16546	0.0305933	2.29318	5.42196	0.422944	Sensitive		dasatinib	IC50	PKHA4	-2.74567	0.0190375	-0.404835	0.681433	-1.08627	Sensitive
			dasatinib	IC50	BRDT	-3.20531	0.0476945	0.0142148	0.110542	0.128591	Sensitive		dasatinib	IC50	ACADS	-2.32568	0.0424802	-0.928028	0.345823	-1.27385	Sensitive
			dasatinib	IC50	AOX1	6.29329	0.00633046	1.43844	0.210419	6.83606	Resistant		dasatinib	IC50	AASS	-2.75914	0.0177863	-0.511818	0.51795	-1.02977	Sensitive
			dasatinib	IC50	CARF	4.35106	0.0132284	2.26577	0.736764	3.0753	Resistant		dasatinib	IC50	TATD1	5.27837	0.00013098	0.460993	-0.560492	1.02149	Resistant
			dasatinib	IC50	GLCE	5.49733	0.00540212	4.03952	2.01307	2.00664	Resistant		dasatinib	IC50	EIF1A	3.99894	0.00174854	0.824359	-0.628883	1.45324	Resistant
			dasatinib	IC50	PIK3C2G	-6.10135	0.0145624	0.13462	0.552172	0.2438	Sensitive		dasatinib	IC50	PRD16	-3.13421	0.0179172	-0.692327	0.640716	-1.33304	Sensitive
			dasatinib	IC50	TMEM117	-14.0082	0.00129792	0.930433	1.99178	0.467137	Sensitive		dasatinib	IC50	MXRA8	6.43907	0.0075949	1.82553	-4.63419	6.45972	Resistant
			dasatinib	IC50	MTMR6	3.51081	0.0246539	3.84866	1.78805	2.15244	Resistant		dasatinib	IC50	ASPH	-5.22582	0.000131297	-1.07858	-0.0310795	-1.0475	Sensitive
			dasatinib	IC50	LYSMD2	2.92956	0.0428525	3.11672	1.05934	2.94214	Resistant		dasatinib	IC50	CADH3	-2.62445	0.0212519	-0.510063	1.35401	-1.86407	Sensitive
			dasatinib	IC50	TSPAN3	-1.35772	0.298636	0.0189999	0.103932	0.18281	Sensitive		dasatinib	IC50	B9EGP5	3.66238	0.00273978	0.674303	-0.498543	1.17285	Resistant
			dasatinib	IC50	SLC5A2	-5.31491	0.0162637	0.301268	0.964216	0.312448	Sensitive		dasatinib	IC50	HEBP2	3.21665	0.00684542	0.74343	-0.388894	1.13232	Resistant
			dasatinib	IC50	KSR1	4.01451	0.0173852	4.12906	1.4722	2.80469	Resistant		dasatinib	IC50	MYL4	-2.60661	0.0351175	-1.38012	-0.372	-1.00812	Sensitive
			dasatinib	IC50	SLC14A1	-4.30186	0.0263418	0.0827235	0.536455	0.154204	Sensitive		dasatinib	IC50	5NTD	-4.43502	0.00123698	-0.910724	1.1755	-2.08623	Sensitive
			dasatinib	IC50	CACNG8	-3.49276	0.0386224	0.0509658	0.330037	0.154425	Sensitive		dasatinib	IC50	KAD5	2.62042	0.0247139	1.25215	0.00319067	1.24896	Resistant
			dasatinib	IC50	CASQ1	-6.31776	0.0241499	0.170943	0.722466	0.23661	Sensitive		dasatinib	IC50	SE1L3	-2.73985	0.0356186	-1.021	0.466767	-1.48776	Sensitive
			dasatinib	IC50	SYT2	-4.53984	0.0287996	0.0472009	0.106558	0.442961	Sensitive		dasatinib	IC50	RTN4	-4.23537	0.0133127	0.0274588	1.47463	-1.44717	Sensitive
			dasatinib	IC50	GALM	-3.77464	0.0337351	1.22344	5.20382	0.235103	Sensitive		dasatinib	IC50	ACPH	3.4548	0.0040796	0.583575	-0.471204	1.05478	Resistant
			dasatinib	IC50	RUBCN	2.2445	0.15307	1.3109	0.0650739	20.1448	Resistant		dasatinib	IC50	MTAP	2.77237	0.0152686	0.3568	-1.06744	1.42424	Resistant
			dasatinib	IC50	SCD5	5.72669	0.0272947	3.73057	1.81173	2.05912	Resistant		dasatinib	IC50	PLOD1	-2.83943	0.0186784	-0.428674	0.670374	-1.09905	Sensitive
			dasatinib	IC50	CYP4V2	-7.44362	0.00174862	0.8501	2.53595	0.335219	Sensitive		dasatinib	IC50	RNF14	2.99513	0.0106756	0.852657	-0.407085	1.25974	Resistant
			dasatinib	IC50	PIK3R1	9.19596	0.00477946	3.58033	1.78026	2.01113	Resistant		dasatinib	IC50	E2AK1	3.36603	0.0274653	0.735479	-0.456834	1.19231	Resistant
			dasatinib	IC50	TIMD4	-8.08926	0.0149405	0	0.0379526	0	Sensitive		dasatinib	IC50	NTAN1	2.53175	0.0300125	0.60821	-0.620464	1.22867	Resistant
			dasatinib	IC50	CLTRN	-4.08994	0.0248948	0.259683	0.583954	0.444698	Sensitive		dasatinib	IC50	KCAB2	2.84373	0.0226278	0.119076	-1.09515	1.21423	Resistant
			dasatinib	IC50	RSPO2	8.62322	0.0131828	0.102001	0	Inf	Resistant		dasatinib	IC50	FNTA	3.71923	0.00228916	0.500923	-0.550059	1.05098	Resistant
			dasatinib	IC50	PDSS1	3.05084	0.0490976	4.3433	2.07877	2.08937	Resistant		dasatinib	IC50	RAB34	-3.89071	0.0022517	-0.228416	1.06263	-1.29104	Sensitive
			dasatinib	IC50	ADIRF	-5.96435	0.0267146	5.20616	10.5231	0.494735	Sensitive		dasatinib	IC50	UD13	-3.55018	0.00424515	-1.51161	0.693265	-2.20488	Sensitive
			dasatinib	IC50	TLCD3B	3.32901	0.0427757	1.31069	0.384229	3.41121	Resistant		dasatinib	IC50	PTGES	-3.49659	0.00448457	-0.0754336	3.04068	-3.11611	Sensitive
			dasatinib	IC50	FSIP1	-4.11321	0.0244961	0.594105	1.44447	0.411295	Sensitive		dasatinib	IC50	CYTC	-2.58074	0.0363389	-0.552825	0.816386	-1.36921	Sensitive
			dasatinib	IC50	PIP4K2A	4.31541	0.0207964	4.19722	1.75129	2.39664	Resistant		dasatinib	IC50	PKHA7	-3.7406	0.00232726	-0.530815	1.09144	-1.62225	Sensitive
			dasatinib	IC50	TMEM45B	-9.963	0.00360598	0.93351	4.75082	0.196494	Sensitive		dasatinib	IC50	OTUB1	3.33222	0.00559622	0.462661	-0.578987	1.04165	Resistant
			dasatinib	IC50	CD8A	3.71186	0.0206466	0.742892	0.176782	4.20231	Resistant		dasatinib	IC50	FADS2	-3.87711	0.00208882	-0.56614	1.49384	-2.05998	Sensitive
			dasatinib	IC50	RETREG1	-3.07822	0.0444676	1.70698	3.48152	0.490297	Sensitive		dasatinib	IC50	FADS1	-3.20126	0.0128803	-0.636725	0.677011	-1.31374	Sensitive
			dasatinib	IC50	CERS3	-5.62914	0.0296555	0.0378611	1.20454	0.0314319	Sensitive		dasatinib	IC50	PPCS	3.47221	0.00460323	0.622533	-0.393377	1.01591	Resistant
			dasatinib	IC50	TRIM74	-4.54721	0.0447329	0.259893	0.568836	0.456887	Sensitive		dasatinib	IC50	UB2V2	3.02671	0.00968008	0.342178	-0.680401	1.02258	Resistant
			dasatinib	IC50	SLC26A2	4.34369	0.0182943	4.31414	1.24432	3.46707	Resistant		dasatinib	IC50	CAP2	2.61895	0.0205715	1.07654	-0.18378	1.26032	Resistant
			dasatinib	IC50	EXOG	4.69566	0.0317904	3.51263	1.44636	2.4286	Resistant		dasatinib	IC50	DHB11	-3.31452	0.00547936	-1.74425	-0.0659848	-1.67826	Sensitive
			dasatinib	IC50	FZD1	0.9742	0.43268	1.10538	0.0284296	38.8814	Resistant		dasatinib	IC50	ITB1	-3.29285	0.0102896	-0.461338	0.66167	-1.12301	Sensitive
			dasatinib	IC50	DPYSL5	-4.10418	0.0166325	0.258547	1.39123	0.185841	Sensitive		dasatinib	IC50	CNTN1	-2.83586	0.0240424	-0.902351	0.651523	-1.55387	Sensitive
			dasatinib	IC50	KRTCAP3	24.6437	0.00164092	5.45875	1.66751	3.27359	Resistant		dasatinib	IC50	MCAT	3.40999	0.00476589	0.463864	-0.54877	1.01263	Resistant
			dasatinib	IC50	PLA2G4D	-3.6367	0.0474386	0.0285229	0.115132	0.247741	Sensitive		dasatinib	IC50	UNC5C	-13.7634	0.00523754	-0.0124681	4.02391	-4.03637	Sensitive
			dasatinib	IC50	C16orf86	-5.69882	0.00935068	0.432792	1.29101	0.335235	Sensitive		dasatinib	IC50	LANC1	4.28368	0.000757399	0.331518	-0.97224	1.30376	Resistant
			dasatinib	IC50	PTH1R	3.02505	0.0423683	0.316851	0.108999	2.90691	Resistant		dasatinib	IC50	SETD7	5.83934	5.18289e-05	0.623483	-0.85979	1.48327	Resistant
			dasatinib	IC50	KASH5	-4.31005	0.0417119	0.0325369	0.664407	0.0489714	Sensitive		dasatinib	IC50	ZN114	-6.81425	0.00104533	-1.43371	0.151108	-1.58481	Sensitive
			dasatinib	IC50	MEIOB	-4.44039	0.0464981	0.00957019	0.351968	0.0271905	Sensitive		dasatinib	IC50	GALK1	4.0988	0.00121795	0.551575	-0.685474	1.23705	Resistant
			dasatinib	IC50	ASRGL1	3.11031	0.0362636	4.09378	1.37866	2.9694	Resistant		dasatinib	IC50	PCDH7	-2.23049	0.0468266	-0.370952	0.888102	-1.25905	Sensitive
			dasatinib	IC50	ADGRL4	-7.91191	0.015602	0.0047851	0.0426443	0.112209	Sensitive		dasatinib	IC50	IKBB	5.94339	3.71957e-05	0.574622	-0.453283	1.0279	Resistant
			dasatinib	IC50	AXDND1	6.34791	0.0233224	0.451296	0.0379526	11.891	Resistant		dasatinib	IC50	GATA6	-2.49018	0.0487374	-0.370472	1.10693	-1.4774	Sensitive
			dasatinib	IC50	FCMR	5.03291	0.0133489	1.99281	0.535702	3.71999	Resistant		dasatinib	IC50	PKHG3	-3.49322	0.00431682	-0.686823	0.569378	-1.2562	Sensitive
			dasatinib	IC50	DISC1	8.88468	0.00421515	1.48344	0.30035	4.93902	Resistant		dasatinib	IC50	JCAD	-3.74732	0.00380866	-0.674773	0.594327	-1.2691	Sensitive
			dasatinib	IC50	KBTBD8	3.6728	0.0233348	0.733603	0.196039	3.74212	Resistant		dasatinib	IC50	TXNL1	3.83069	0.0024255	0.446257	-0.609392	1.05565	Resistant
			dasatinib	IC50	ADORA1	6.63148	0.00313263	2.62485	0.53329	4.922	Resistant		dasatinib	IC50	DUS1L	3.43055	0.0072575	0.305308	-0.850667	1.15598	Resistant
			dasatinib	IC50	MNDA	-5.02985	0.0373275	0	0.0238312	0	Sensitive		dasatinib	IC50	EMIL2	18.3384	0.000353798	0.102517	-0.967205	1.06972	Resistant
			dasatinib	IC50	ASB5	8.08926	0.0149405	0.0379526	0	Inf	Resistant		dasatinib	IC50	NCDN	4.08153	0.00151638	0.673151	-0.398549	1.0717	Resistant
			dasatinib	IC50	SYTL3	-3.81005	0.0374786	1.17861	2.99877	0.393031	Sensitive		dasatinib	IC50	CO4A1	-2.2172	0.0486205	-0.818298	1.2515	-2.0698	Sensitive
			dasatinib	IC50	IQUB	-3.82786	0.0234138	0.256404	0.675305	0.379687	Sensitive		dasatinib	IC50	CHM4A	3.29823	0.00772905	0.249444	-0.790957	1.0404	Resistant
			dasatinib	IC50	PHKG1	4.15962	0.0298691	1.12204	0.530616	2.11459	Resistant		dasatinib	IC50	LYSM1	5.08671	0.000464902	0.781483	-1.18446	1.96595	Resistant
			dasatinib	IC50	C9orf24	-4.7407	0.0332397	0.160111	0.4989	0.320929	Sensitive		dasatinib	IC50	NAGK	5.67121	5.77232e-05	0.912375	-0.469422	1.3818	Resistant
			dasatinib	IC50	DYNLT3	5.96466	0.010937	4.71326	2.26018	2.08534	Resistant		dasatinib	IC50	LYN	-3.3774	0.00521737	-0.909516	0.288179	-1.1977	Sensitive
			dasatinib	IC50	RNF183	-3.86478	0.0203968	0.151973	0.466467	0.325796	Sensitive		dasatinib	IC50	MET	-3.3385	0.00992566	-0.827423	1.04508	-1.8725	Sensitive
			dasatinib	IC50	MAGEC3	8.03047	0.0060516	0.217901	0.0190461	11.4407	Resistant		dasatinib	IC50	CDK4	2.2907	0.040827	1.34774	-0.181391	1.52914	Resistant
			dasatinib	IC50	DRGX	-2.82839	0.0474277	0.0047851	0.0238312	0.200791	Sensitive		dasatinib	IC50	FGFR2	-53.0636	0.0119959	-0.538547	2.42447	-2.96301	Sensitive
			dasatinib	IC50	KCNC2	-5.02985	0.0373275	0	0.0238312	0	Sensitive		dasatinib	IC50	IKKB	2.99144	0.0107062	1.04181	-0.287005	1.32882	Resistant
			dasatinib	IC50	SLC38A8	-6.63506	0.00806826	0.0143081	0.14166	0.101004	Sensitive		dasatinib	IC50	CSK	3.05921	0.00917303	0.234118	-0.807958	1.04208	Resistant
			dasatinib	IC50	ART5	-3.59805	0.0352077	0.11664	0.395949	0.294583	Sensitive		dasatinib	IC50	SBNO2	4.98949	0.0378998	0.584285	-0.563022	1.14731	Resistant
			dasatinib	IC50	TUBA1A	5.50391	0.0226176	7.17756	2.2248	3.22616	Resistant		dasatinib	IC50	4EBP1	3.06246	0.0338316	0.320448	-1.50427	1.82472	Resistant
			dasatinib	IC50	SLC43A2	8.45257	0.00716419	4.81266	1.31518	3.65933	Resistant		dasatinib	IC50	PHLA1	-2.55815	0.0251378	-0.58174	1.50488	-2.08662	Sensitive
			dasatinib	IC50	KRT80	4.30753	0.0258464	6.19799	2.45518	2.52445	Resistant		dasatinib	IC50	DYH9	3.68758	0.00374028	0.149705	-1.16325	1.31295	Resistant
			dasatinib	IC50	RCOR2	4.18595	0.0390929	2.01898	0.641271	3.14841	Resistant		dasatinib	IC50	PFD3	3.92588	0.00161734	0.325508	-0.72798	1.05349	Resistant
			dasatinib	IC50	MGAT5B	3.73774	0.0335586	3.11281	0.898665	3.46381	Resistant		dasatinib	IC50	CLIC5	-2.81207	0.0211065	-0.386415	2.61247	-2.99888	Sensitive
			dasatinib	IC50	NAALADL1	-3.32034	0.0305368	0.13384	0.451482	0.296447	Sensitive		dasatinib	IC50	GDPP1	3.82337	0.00212366	0.252324	-1.08316	1.33548	Resistant
			dasatinib	IC50	KCNV2	5.33299	0.0061393	0.154717	0.0425075	3.63975	Resistant		dasatinib	IC50	SAHH2	4.16596	0.00108915	0.647516	-0.446231	1.09375	Resistant
			dasatinib	IC50	KIF5C	5.40994	0.0324078	1.89242	0.154834	12.2223	Resistant		dasatinib	IC50	IL1AP	-3.15938	0.00840101	-0.531364	0.646918	-1.17828	Sensitive
			dasatinib	IC50	LRP1B	-3.42293	0.0282107	0.0939038	0.416114	0.225669	Sensitive		dasatinib	IC50	IL1AP	-3.12859	0.0083241	-0.416066	0.741467	-1.15753	Sensitive
			dasatinib	IC50	OR13J1	-7.08926	0.0193227	0	0.0332609	0	Sensitive		dasatinib	IC50	ALKB6	3.82116	0.00655954	0.49349	-0.687981	1.18147	Resistant
			dasatinib	IC50	IRS1	7.03644	0.0195884	4.5007	2.22855	2.01956	Resistant		dasatinib	IC50	PO3F2	6.14771	0.0254532	-0.134461	-1.17268	1.03822	Resistant
			dasatinib	IC50	VXN	3.74393	0.0216011	1.35356	0.194988	6.94178	Resistant		dasatinib	IC50	H2A2A	-4.63621	0.00124344	-0.495536	0.809185	-1.30472	Sensitive
			dasatinib	IC50	GPRIN1	4.6649	0.0319996	3.20792	0.869646	3.68876	Resistant		dasatinib	IC50	KPRA	4.42854	0.00068864	0.619029	-0.44601	1.06504	Resistant
			dasatinib	IC50	C22orf15	3.50819	0.0392796	0.136982	0.0284296	4.8183	Resistant		dasatinib	IC50	PDPK1	3.65054	0.00545655	0.781011	-0.402332	1.18334	Resistant
			dasatinib	IC50	RASSF6	-4.26797	0.0150773	0.489721	2.22242	0.220355	Sensitive		dasatinib	IC50	SRBS2	-4.28663	0.000943855	-0.886855	1.11377	-2.00062	Sensitive
			dasatinib	IC50	SDC2	3.14442	0.047698	6.5646	1.61123	4.07429	Resistant		dasatinib	IC50	INADL	-2.56059	0.0234496	-0.143889	1.01951	-1.1634	Sensitive
			dasatinib	IC50	LINGO1	18.0827	0.00286368	1.07279	0.0519371	20.6556	Resistant		dasatinib	IC50	MP2K1	3.07645	0.00890018	0.251932	-0.863966	1.1159	Resistant
			dasatinib	IC50	OTUD7A	8.62025	0.0131917	0.115382	0.0143553	8.03759	Resistant		dasatinib	IC50	AKAP5	-3.05378	0.0267727	-0.715125	1.39999	-2.11512	Sensitive
			dasatinib	IC50	TMEM154	3.54346	0.0423978	2.27618	1.12735	2.01905	Resistant		dasatinib	IC50	PROSC	3.56859	0.00388017	0.757752	-0.638561	1.39631	Resistant
			dasatinib	IC50	FAM153A	-4.80249	0.00950212	0.037322	0.226082	0.165082	Sensitive		dasatinib	IC50	OSTF1	6.68486	1.03727e-05	0.558299	-0.694675	1.25297	Resistant
			dasatinib	IC50	HOXD4	-4.97184	0.0381541	0	1.49783	0	Sensitive		dasatinib	IC50	TR10A	-3.34936	0.00853251	-0.0318902	1.58773	-1.61962	Sensitive
			dasatinib	IC50	KRT4	-9.70174	0.0103165	0.175525	7.41285	0.0236784	Sensitive		dasatinib	IC50	SERA	3.91183	0.00157309	0.647418	-0.926201	1.57362	Resistant
			dasatinib	IC50	TANC2	3.98497	0.0169467	5.10861	2.41647	2.11408	Resistant		dasatinib	IC50	HUTI	6.30701	0.0242294	-0.986926	-2.50265	1.51573	Resistant
			dasatinib	IC50	TPPP	-1.11663	0.350347	1.40345	3.43259	0.408859	Sensitive		dasatinib	IC50	TSR2	4.23346	0.000965858	0.647917	-0.61141	1.25933	Resistant
			dasatinib	IC50	KRT27	-5.91495	0.0274125	0	0.106349	0	Sensitive		dasatinib	IC50	MRP3	-2.75335	0.0158857	-0.765475	0.372214	-1.13769	Sensitive
			dasatinib	IC50	ADRA1D	3.80088	0.0223025	0.119651	0.0284296	4.20867	Resistant		dasatinib	IC50	TAP2	-2.64452	0.0198845	-0.235741	0.862391	-1.09813	Sensitive
			dasatinib	IC50	ZNF556	-3.38889	0.0417105	0.364024	1.70759	0.21318	Sensitive		dasatinib	IC50	K1324	2.70842	0.0423335	2.08025	-0.585871	2.66613	Resistant
			dasatinib	IC50	CXCR6	3.01692	0.0465113	0.225764	0.106229	2.12525	Resistant		dasatinib	IC50	PCSK9	-2.72095	0.018632	-0.279	0.851452	-1.13045	Sensitive
			dasatinib	IC50	ZMAT3	7.16508	0.00905058	2.45023	1.08982	2.24828	Resistant		dasatinib	IC50	TATD3	3.19354	0.0140453	0.26988	-0.923887	1.19377	Resistant
			dasatinib	IC50	GXYLT2	3.35031	0.0409115	1.36597	0.328305	4.16068	Resistant		dasatinib	IC50	ZN335	-3.89823	0.0292427	-0.020641	0.988442	-1.00908	Sensitive
			dasatinib	IC50	DMRT2	4.78996	0.00895479	0.620155	0.168714	3.67577	Resistant		dasatinib	IC50	SKIV2	6.0856	3.08097e-05	0.44575	-0.851957	1.29771	Resistant
			dasatinib	IC50	SNCG	-5.5229	0.00689671	1.38571	6.51537	0.212683	Sensitive		dasatinib	IC50	STC2	2.53656	0.0259748	1.56163	-1.12388	2.68551	Resistant
			dasatinib	IC50	MMRN2	-6.64293	0.00373448	0.96582	3.47661	0.277805	Sensitive		dasatinib	IC50	MDHC	3.48476	0.00387099	0.320876	-0.682091	1.00297	Resistant
			dasatinib	IC50	GLIPR1L1	-10.2727	0.000506522	0.0472009	0.226403	0.208482	Sensitive		dasatinib	IC50	AK1C3	-3.81669	0.00189157	-1.02354	0.595739	-1.61928	Sensitive
			dasatinib	IC50	PEAK1	7.44801	0.0145785	3.70472	1.13263	3.2709	Resistant		dasatinib	IC50	AK1C2	-12.868	0.000210289	-1.53613	0.827523	-2.36365	Sensitive
			dasatinib	IC50	REP15	-17.6906	0.00308694	0.269832	1.0048	0.268544	Sensitive		dasatinib	IC50	FWCH2	2.31299	0.0367554	0.368507	-0.807951	1.17646	Resistant
			dasatinib	IC50	ANKRD36C	3.63254	0.0460739	3.05064	1.4557	2.09566	Resistant		dasatinib	IC50	CBWD1	4.76569	0.000697494	0.326945	-1.04721	1.37415	Resistant
			dasatinib	IC50	FAM131A	3.60744	0.0486672	3.65525	1.03852	3.51968	Resistant		dasatinib	IC50	CBWD2	9.79828	0.010256	0.437296	-1.46579	1.90308	Resistant
			dasatinib	IC50	GPX2	-5.08094	0.0361444	0.978381	6.1241	0.159759	Sensitive		dasatinib	IC50	GGCT	2.62353	0.0298863	0.762681	-0.490967	1.25365	Resistant
			dasatinib	IC50	OR4F21	5.02985	0.0373275	0.0238312	0	Inf	Resistant		dasatinib	IC50	TBCD1	2.73398	0.0246027	0.439329	-0.586148	1.02548	Resistant
			dasatinib	IC50	KBTBD11	-7.46364	0.00175583	0.220914	1.20779	0.182907	Sensitive		dasatinib	IC50	FKB11	-3.86725	0.0017943	-1.27854	0.950742	-2.22928	Sensitive
			dasatinib	IC50	BASP1	3.92963	0.0176684	6.86141	1.67032	4.10784	Resistant		dasatinib	IC50	PLBL1	-2.25168	0.0409356	0.168815	1.48238	-1.31356	Sensitive
			dasatinib	IC50	SUMO4	-4.22844	0.0220883	0.123176	0.321563	0.383053	Sensitive		dasatinib	IC50	FUCO2	-4.03618	0.00126058	-0.278588	0.771056	-1.04964	Sensitive
			dasatinib	IC50	NAALADL2	4.07381	0.0303956	2.47627	0.857179	2.88886	Resistant		dasatinib	IC50	ABC3C	-2.57792	0.0251467	-1.79605	-0.468261	-1.32778	Sensitive
			dasatinib	IC50	DNAJC22	3.91891	0.0180969	3.6733	1.25496	2.92703	Resistant		dasatinib	IC50	ABC3F	-3.14609	0.0329093	-1.12721	0.796799	-1.92401	Sensitive
			dasatinib	IC50	TAF7	2.10437	0.103342	0.352116	0.129391	2.72132	Resistant		dasatinib	IC50	SLIT1	-2.65151	0.020872	-0.256516	0.788332	-1.04485	Sensitive
			dasatinib	IC50	GPBAR1	8.40634	0.00360812	0.246698	0.0794632	3.10456	Resistant		dasatinib	IC50	OSTP	-2.64871	0.0380883	-0.644722	0.642298	-1.28702	Sensitive
			dasatinib	IC50	TDRP	-5.07711	0.0351662	0.736154	3.55281	0.207203	Sensitive		dasatinib	IC50	TENS4	-3.57109	0.0096938	-0.445086	1.57327	-2.01835	Sensitive
			dasatinib	IC50	TMEM64	4.26061	0.0138889	5.42058	1.48666	3.64615	Resistant		dasatinib	IC50	RN213	2.72156	0.0271923	0.24094	-1.02413	1.26507	Resistant
			dasatinib	IC50	LSMEM1	3.53657	0.0342742	0.688875	0.146712	4.69542	Resistant		dasatinib	IC50	IF16	-2.47202	0.0268951	-1.23821	0.0686883	-1.3069	Sensitive
			dasatinib	IC50	AEN	5.45637	0.00922567	4.97182	1.96075	2.53567	Resistant		dasatinib	IC50	CXAR	-4.28267	0.00316715	-0.647219	1.11543	-1.76265	Sensitive
			dasatinib	IC50	LRRC75A	3.42712	0.0345026	1.42446	0.638239	2.23186	Resistant		dasatinib	IC50	PPAC	2.98369	0.0101317	0.349846	-0.657591	1.00744	Resistant
			dasatinib	IC50	CFAP65	5.03362	0.0122919	0.0840215	0.0379526	2.21385	Resistant		dasatinib	IC50	SIAT1	3.06261	0.0163068	-0.0488675	-1.05795	1.00909	Resistant
			dasatinib	IC50	PHLDA2	6.80001	0.0151363	5.7947	2.8593	2.02661	Resistant		dasatinib	IC50	DHE4	3.77709	0.00601592	0.766289	-3.02429	3.79058	Resistant
			dasatinib	IC50	GRID1	6.91276	0.0202917	0.0565835	0.0238312	2.37435	Resistant		dasatinib	IC50	ATG3	4.02394	0.0016104	0.413317	-0.880012	1.29333	Resistant
			dasatinib	IC50	TREX2	4.68074	0.0103423	1.32436	0.557962	2.37356	Resistant		dasatinib	IC50	ACBP	4.02884	0.0013209	0.70935	-1.11598	1.82533	Resistant
			dasatinib	IC50	RP1L1	-8.19354	0.00383016	0.0745969	0.286784	0.260116	Sensitive		dasatinib	IC50	KGP1	239.866	0.00265404	-0.332308	-1.82104	1.48873	Resistant
			dasatinib	IC50	SDR42E2	-6.37278	0.00311859	0.0190932	0.0611855	0.312055	Sensitive		dasatinib	IC50	PHP14	2.91735	0.0118048	0.627823	-0.6719	1.29972	Resistant
			dasatinib	IC50	PP2D1	3.21383	0.0376847	0.368497	0.127418	2.89204	Resistant		dasatinib	IC50	ARCH	3.11066	0.00983227	0.297426	-0.787803	1.08523	Resistant
			dasatinib	IC50	SPATA32	3.57269	0.0345689	0.391261	0.171433	2.2823	Resistant		dasatinib	IC50	ENSA	3.2502	0.0112795	0.679205	-0.586178	1.26538	Resistant
			dasatinib	IC50	KRBA2	3.49616	0.0264749	1.52492	0.383911	3.97207	Resistant		dasatinib	IC50	ATG7	2.75259	0.017992	0.733122	-0.487185	1.22031	Resistant
			dasatinib	IC50	SDR42E1	4.3445	0.0288265	4.12267	1.71336	2.40619	Resistant		dasatinib	IC50	LAT1	-2.90242	0.011745	-0.634775	0.665385	-1.30016	Sensitive
			dasatinib	IC50	ADSS1	4.48247	0.0289597	4.13053	1.89164	2.18357	Resistant		dasatinib	IC50	RAP2B	-3.12362	0.00780556	-0.450649	0.636412	-1.08706	Sensitive
			dasatinib	IC50	PRKN	-5.46484	0.0274141	0.0975688	0.328396	0.297107	Sensitive		dasatinib	IC50	IMDH2	3.21312	0.00640596	0.379387	-0.622887	1.00227	Resistant
			dasatinib	IC50	PRKG1	3.14843	0.0431311	1.9512	0.414075	4.71219	Resistant		dasatinib	IC50	IBP3	-4.60357	0.000840498	-0.687454	1.66709	-2.35455	Sensitive
			dasatinib	IC50	MYBL1	3.15784	0.0429212	5.0282	1.81976	2.76312	Resistant		dasatinib	IC50	ASPG	-5.31455	0.000251507	-0.292866	0.733414	-1.02628	Sensitive
			dasatinib	IC50	NAT8L	6.92659	0.0200891	1.89485	0.230566	8.21824	Resistant		dasatinib	IC50	XPOT	3.23991	0.00678682	0.521662	-0.556104	1.07777	Resistant
			dasatinib	IC50	THNSL1	4.45918	0.0178936	2.77329	0.536704	5.16725	Resistant		dasatinib	IC50	ATS12	-5.23276	0.0346344	-0.235718	1.3196	-1.55532	Sensitive
			dasatinib	IC50	HPDL	4.08672	0.0459948	3.47437	1.3075	2.65726	Resistant		dasatinib	IC50	THMS2	-4.03005	0.0065517	-1.10391	0.161404	-1.26532	Sensitive
			dasatinib	IC50	PDE2A	9.89926	0.010051	0.428493	0.0703893	6.08748	Resistant		dasatinib	IC50	S10A4	-2.45044	0.0308574	-0.473869	0.849269	-1.32314	Sensitive
			dasatinib	IC50	FSCN2	4.46507	0.0236394	1.50798	0.355613	4.24049	Resistant		dasatinib	IC50	FSD1L	3.77538	0.00947772	-0.0703974	-1.97878	1.90839	Resistant
			dasatinib	IC50	LILRB4	-4.52396	0.0202113	0.0047851	0.0518927	0.0922114	Sensitive		dasatinib	IC50	DSG3	-2.67826	0.0199517	-0.989398	0.647163	-1.63656	Sensitive
			dasatinib	IC50	KANK3	-3.57814	0.0242651	0.567843	2.29037	0.247927	Sensitive		dasatinib	IC50	MAPK3	2.37296	0.0354292	0.517713	-0.552588	1.0703	Resistant
			dasatinib	IC50	ACTL7A	4.9493	0.00777287	0.0379526	0.0047851	7.93142	Resistant		dasatinib	IC50	DHSO	2.43141	0.0495204	0.558234	-0.708649	1.26688	Resistant
			dasatinib	IC50	SPATA21	3.4144	0.0344119	0.297067	0.101426	2.92891	Resistant		dasatinib	IC50	B7Z8B3	3.83536	0.00296754	0.474299	-0.905052	1.37935	Resistant
			dasatinib	IC50	GCNT1	-6.40106	0.00542465	1.38588	3.93632	0.352075	Sensitive		dasatinib	IC50	PEX19	4.68963	0.000347965	0.474905	-0.737748	1.21265	Resistant
			dasatinib	IC50	H2AP	7.53407	0.0171651	0.119734	0	Inf	Resistant		dasatinib	IC50	CTC1	-5.39146	0.032723	-0.234903	0.808178	-1.04308	Sensitive
			dasatinib	IC50	PLA2G4E	-4.02652	0.0214022	0.0284314	0.132795	0.214099	Sensitive		dasatinib	IC50	ESAM	-4.17362	0.00476135	-0.676863	1.05048	-1.72734	Sensitive
			dasatinib	IC50	FAM25A	-5.84353	0.0129377	0.608242	1.97691	0.307673	Sensitive		dasatinib	IC50	SIAS	3.71594	0.00231241	0.644766	-0.566568	1.21133	Resistant
			dasatinib	IC50	ENO4	-4.91638	0.0281254	0.158171	0.356055	0.44423	Sensitive		dasatinib	IC50	ELL2	-4.51765	0.00629649	0.0702714	1.29961	-1.22934	Sensitive
			dasatinib	IC50	PAQR9	-6.70458	0.0215304	0.0236463	0.137504	0.171968	Sensitive		dasatinib	IC50	FA96A	3.1087	0.00875016	0.382471	-0.640693	1.02316	Resistant
			dasatinib	IC50	HMX3	-4.39685	0.0132941	0.0471094	0.167465	0.281308	Sensitive		dasatinib	IC50	MUC16	-3.26755	0.0204491	-0.330478	2.66887	-2.99935	Sensitive
			dasatinib	IC50	ZBED6CL	7.58484	0.0132975	3.46846	1.3387	2.59093	Resistant		dasatinib	IC50	B4E1Z4	-3.36704	0.00843072	0.179164	1.70484	-1.52568	Sensitive
			dasatinib	IC50	BCL2L15	4.3068	0.0478386	0.674648	0.163383	4.12924	Resistant		dasatinib	IC50	GFRP	2.50741	0.0344576	-0.0145782	-2.35395	2.33937	Resistant
			dasatinib	IC50	FAM78B	9.84132	0.0101679	0.12864	0.0143553	8.96114	Resistant		dasatinib	IC50	APEX1	2.80052	0.0145879	0.323524	-0.711464	1.03499	Resistant
			dasatinib	IC50	ZNF563	-3.66257	0.0309044	0.890531	2.01129	0.442766	Sensitive		dasatinib	IC50	ARAP3	-3.22733	0.0143679	-0.588277	0.415936	-1.00421	Sensitive
			dasatinib	IC50	HLA.DRB1	6.07768	0.00440879	4.05156	1.13348	3.57445	Resistant		dasatinib	IC50	RABP2	2.44226	0.0393038	1.65352	-0.6893	2.34282	Resistant
			dasatinib	IC50	SERPINA3	8.43294	0.0126844	8.25053	0.290488	28.4023	Resistant		dasatinib	IC50	TPSN	-3.44977	0.0046371	-0.258726	1.20976	-1.46848	Sensitive
			dasatinib	IC50	SULF2	4.2752	0.0229867	7.2196	2.362	3.05657	Resistant		dasatinib	IC50	RN149	-3.67855	0.00428147	-0.497615	0.675039	-1.17265	Sensitive
			dasatinib	IC50	ZNF239	5.4101	0.00735953	3.70744	1.81022	2.04806	Resistant		dasatinib	IC50	GMPPB	3.07507	0.00859816	0.741396	-0.347103	1.0885	Resistant
			dasatinib	IC50	HCAR1	-3.28194	0.0309302	1.58456	4.53899	0.349101	Sensitive		dasatinib	IC50	ITPA	4.75274	0.000360453	0.126229	-1.27076	1.39699	Resistant
			dasatinib	IC50	ADAM32	6.02284	0.0213206	1.39897	0.118522	11.8034	Resistant		dasatinib	IC50	KDM8	4.94654	0.00602198	0.854578	-0.360513	1.21509	Resistant
			dasatinib	IC50	NOL4L	3.24091	0.034296	4.41515	1.70831	2.58452	Resistant		dasatinib	IC50	TUSC1	36.2099	0.0175769	0.450805	-0.568461	1.01927	Resistant
			dasatinib	IC50	ADARB1	4.546	0.0424524	4.30653	2.06301	2.0875	Resistant		dasatinib	IC50	BASI	-2.88896	0.0228284	-0.790163	0.449056	-1.23922	Sensitive
			dasatinib	IC50	CYP2F1	-4.49646	0.04297	0.00957019	0.16696	0.0573204	Sensitive		dasatinib	IC50	SCRN3	3.76203	0.0033588	0.24089	-0.913735	1.15462	Resistant
			dasatinib	IC50	ELANE	-4.62763	0.00984197	0.033076	0.14601	0.226533	Sensitive		dasatinib	IC50	SKI	-2.77558	0.0219966	-0.459734	0.71681	-1.17654	Sensitive
			dasatinib	IC50	KLHL14	5.02985	0.0373275	0.0238312	0	Inf	Resistant		dasatinib	IC50	ATAD5	-2.53929	0.0255973	-0.295432	0.760908	-1.05634	Sensitive
			dasatinib	IC50	RPE	0.918613	0.455273	0.0964541	0.0143553	6.71906	Resistant		dasatinib	IC50	PLCB4	3.45228	0.016208	0.900715	-1.1658	2.06652	Resistant
			dasatinib	IC50	NPIPB13	4.13042	0.0417229	1.77426	0.76243	2.32711	Resistant		dasatinib	IC50	ENOF1	3.12426	0.00783568	0.612042	-0.41895	1.03099	Resistant
			dasatinib	IC50	RPS6KL1	7.00163	0.0197908	3.84271	0.812835	4.72754	Resistant		dasatinib	IC50	TEAD1	-3.89862	0.00414025	-0.717163	0.632604	-1.34977	Sensitive
			dasatinib	IC50	HLA.DRB5	3.88034	0.0292426	2.77742	0.543717	5.1082	Resistant		dasatinib	IC50	GPX7	-4.70714	0.00104369	-1.32181	2.30322	-3.62503	Sensitive
			dasatinib	IC50	DLL1	-3.71813	0.0287602	1.11265	3.77933	0.294404	Sensitive		dasatinib	IC50	IBP5	3.68791	0.0140807	1.66399	-0.701618	2.36561	Resistant
			dasatinib	IC50	BRINP2	12.2156	0.00663482	1.54483	0	Inf	Resistant		dasatinib	IC50	AASD1	5.56458	0.000732361	0.408286	-1.21423	1.62252	Resistant
			dasatinib	IC50	L1CAM	3.14267	0.0348989	6.25712	2.12871	2.9394	Resistant		dasatinib	IC50	GRAN	4.476	0.00114983	1.07146	-0.583108	1.65457	Resistant
			dasatinib	IC50	GPRASP1	4.1925	0.0466749	1.30191	0.384775	3.38355	Resistant		dasatinib	IC50	IKBA	4.78355	0.0295362	0.827322	-0.673758	1.50108	Resistant
			dasatinib	IC50	TCEAL6	4.23526	0.0133249	0.0379526	0.00957019	3.96571	Resistant		dasatinib	IC50	ENDD1	-2.5435	0.024986	-0.456599	0.572036	-1.02864	Sensitive
			dasatinib	IC50	MAFB	4.04497	0.0352705	2.61408	0.281884	9.27362	Resistant		dasatinib	IC50	PROF2	2.77191	0.0185032	0.283667	-1.17169	1.45536	Resistant
			dasatinib	IC50	VWA7	4.61937	0.0100431	2.86567	0.70445	4.06795	Resistant		dasatinib	IC50	SH3G2	-4.04852	0.0154946	0.307252	3.64699	-3.33974	Sensitive
			dasatinib	IC50	PRR3	1.61289	0.230778	0.0377713	0.00957019	3.94676	Resistant		dasatinib	IC50	CAV1	-2.30921	0.0494751	-0.604029	1.44379	-2.04782	Sensitive
			dasatinib	IC50	RANBP17	4.52021	0.0408844	3.81011	1.83618	2.07503	Resistant		dasatinib	IC50	PBDC1	2.28417	0.0426707	0.210365	-0.837125	1.04749	Resistant
			dasatinib	IC50	AARD	7.88875	0.00575844	5.50917	0.386463	14.2554	Resistant		dasatinib	IC50	RN146	2.38597	0.0345795	0.559652	-0.637078	1.19673	Resistant
			dasatinib	IC50	PKHD1L1	-4.82415	0.0382886	0.0606567	1.22529	0.0495039	Sensitive		dasatinib	IC50	SNX25	-4.71248	0.0180903	-0.488328	0.614511	-1.10284	Sensitive
			dasatinib	IC50	ZBTB10	3.3967	0.0282734	3.6555	1.41096	2.59078	Resistant		dasatinib	IC50	CK068	2.93919	0.0107819	0.842875	-0.319421	1.1623	Resistant
			dasatinib	IC50	EXOC3L4	-6.66732	0.0084645	0.378301	2.97458	0.127178	Sensitive		dasatinib	IC50	ZN639	-4.83862	0.0401574	-0.732471	1.00336	-1.73583	Sensitive
			dasatinib	IC50	SERPINB11	-5.05941	0.0369164	0	0.0472454	0	Sensitive		dasatinib	IC50	SCEL	-3.63433	0.00852779	-1.13409	1.89918	-3.03327	Sensitive
			dasatinib	IC50	DIO1	-2.90316	0.0475786	0.0913112	0.277906	0.328569	Sensitive		dasatinib	IC50	SCEL	-6.89796	0.00366319	-1.80355	2.84967	-4.65322	Sensitive
			dasatinib	IC50	CLDN9	4.68812	0.0192552	1.64787	0.405103	4.06777	Resistant		dasatinib	IC50	SIM13	-9.40066	0.000237774	-1.37251	1.34493	-2.71744	Sensitive
			dasatinib	IC50	COLCA2	-4.24756	0.0181359	0.362035	2.66635	0.135779	Sensitive		dasatinib	IC50	CATL2	-2.57531	0.0221686	-0.443105	0.602567	-1.04567	Sensitive
			dasatinib	IC50	GNAT3	-8.08926	0.0149405	0	0.0379526	0	Sensitive		dasatinib	IC50	HEG1	-2.60868	0.0210408	-0.274837	1.03264	-1.30748	Sensitive
			dasatinib	IC50	NPIPA8	-6.15209	0.00385343	0.697035	3.64803	0.191072	Sensitive		dasatinib	IC50	PREX1	3.00605	0.0180696	1.12522	-0.729151	1.85437	Resistant
			dasatinib	IC50	RSC1A1	3.52435	0.0385422	1.14246	0.237429	4.8118	Resistant		dasatinib	IC50	CPZIP	-3.74116	0.00424306	-1.09848	0.0647192	-1.1632	Sensitive
			dasatinib	IC50	ATAD3C	-4.67804	0.030207	1.08989	3.04279	0.358187	Sensitive		dasatinib	IC50	BT3L4	3.39602	0.00610777	0.514606	-0.587626	1.10223	Resistant
			dasatinib	IC50	TIGD1	4.27209	0.0358278	1.99341	0.969433	2.05627	Resistant		dasatinib	IC50	AOFA	-3.12819	0.00786073	-0.840599	0.641457	-1.48206	Sensitive
			dasatinib	IC50	KLLN	42.456	1.86252e-06	0.787952	0.337195	2.33678	Resistant		dasatinib	IC50	ID1	-3.35954	0.00585188	-0.830935	0.650199	-1.48113	Sensitive
			dasatinib	IC50	RTL5	6.47963	0.00923546	1.4258	0.29618	4.81398	Resistant		dasatinib	IC50	CK054	2.97424	0.0102589	0.397854	-0.832457	1.23031	Resistant
			dasatinib	IC50	UPK3B	-5.29984	0.00610108	1.45965	4.32985	0.337114	Sensitive		dasatinib	IC50	CCD71	-3.62823	0.00769687	-0.519075	0.499069	-1.01814	Sensitive
			dasatinib	IC50	ECSCR	-8.08926	0.0149405	0	0.0379526	0	Sensitive		dasatinib	IC50	ROR1	-2.99879	0.0151003	-1.03404	1.39193	-2.42597	Sensitive
			dasatinib	IC50	TAS2R43	4.86955	0.0126576	0.158841	0.0284296	5.58716	Resistant		dasatinib	IC50	GAB1	2.81062	0.0192296	0.635968	-0.403284	1.03925	Resistant
			dasatinib	IC50	HCAR3	-7.68658	0.00329943	0.185727	1.72045	0.107953	Sensitive		dasatinib	IC50	SPTB2	-3.4935	0.00366467	-0.643138	0.586119	-1.22926	Sensitive
			dasatinib	IC50	NEDD8.MDP1	-7.8411	0.0157919	0.356544	1.78099	0.200195	Sensitive		dasatinib	IC50	SPTB2	-4.58872	0.000955445	-0.906161	1.47107	-2.37723	Sensitive
			dasatinib	IC50	SPDYE6	5.19029	0.0144545	1.51906	0.671871	2.26094	Resistant		dasatinib	IC50	H0Y2S9	-3.10034	0.00782849	-0.332777	0.96367	-1.29645	Sensitive
			dasatinib	IC50	CCDC187	-4.78119	0.010579	0.098966	0.633036	0.156335	Sensitive		dasatinib	IC50	MPRIP	-3.7418	0.00221815	-0.383038	0.956231	-1.33927	Sensitive
			dasatinib	IC50	SMIM32	7.81404	0.00203258	0.213873	0.0284314	7.52242	Resistant		dasatinib	IC50	INGR1	-3.1638	0.00906355	-0.381535	0.706236	-1.08777	Sensitive
			dasatinib	IC50	FAM47E.STBD1	6.24327	0.00335504	0.903238	0.167184	5.40266	Resistant		dasatinib	IC50	PEBP1	3.71425	0.00275943	0.402539	-0.727966	1.1305	Resistant
			dasatinib	IC50	RIMBP3B	3.58625	0.0476394	0.39344	0.123836	3.1771	Resistant		dasatinib	IC50	TRY2	-48.6948	0.0130718	-0.948942	2.90924	-3.85818	Sensitive
			dasatinib	IC50	RIMBP3	2.11966	0.162986	0.224111	0.0142148	15.7661	Resistant		dasatinib	IC50	RHG09	5.54125	0.00545938	-0.515614	-1.79273	1.27711	Resistant
			dasatinib	IC50	H2AB3	6.08197	0.0241199	0.532549	0.0930533	5.72305	Resistant		dasatinib	IC50	GP110	-7.09076	0.0171026	-1.88893	2.73447	-4.6234	Sensitive
			dasatinib	IC50	H2AB2	6.08197	0.0241199	0.532549	0.0930533	5.72305	Resistant		dasatinib	IC50	NUDC2	2.67895	0.0185552	0.564663	-0.584784	1.14945	Resistant
			dasatinib	IC50	ADORA3	3.38566	0.0321064	0.097484	0.0188612	5.1685	Resistant		dasatinib	IC50	PLIN3	2.50645	0.0314906	0.639702	-0.390405	1.03011	Resistant
			dasatinib	IC50	OR4F29	5.02985	0.0373275	0.0238312	0	Inf	Resistant		dasatinib	IC50	CENPV	-2.67075	0.0198722	-0.678715	0.882514	-1.56123	Sensitive
			dasatinib	LN_EC50	MTMR7	2.93223	0.0180299	1.12437	0.45616	2.46486	Resistant		dasatinib	IC50	TCHP	-3.10054	0.0358179	-0.254564	1.06761	-1.32218	Sensitive
			dasatinib	LN_EC50	SARM1	2.93706	0.0183665	2.44429	1.16037	2.10647	Resistant		dasatinib	IC50	SEM4B	-5.17886	0.000140036	-0.53674	0.522437	-1.05918	Sensitive
			dasatinib	LN_EC50	CALCR	2.67257	0.0368589	1.13916	0.0142499	79.9413	Resistant		dasatinib	IC50	CCYL1	-3.70373	0.00236858	-0.544488	0.564382	-1.10887	Sensitive
			dasatinib	LN_EC50	ABCC8	5.31362	0.000513574	1.38044	0.256694	5.37776	Resistant		dasatinib	IC50	NUD22	4.37192	0.00543371	0.792742	-0.560079	1.35282	Resistant
			dasatinib	LN_EC50	NOS2	2.29442	0.047478	0.0363968	0.00714229	5.09596	Resistant		dasatinib	IC50	RIR1	2.59126	0.0215893	0.607438	-0.423252	1.03069	Resistant
			dasatinib	LN_EC50	CNTN1	-2.67451	0.0413873	0.703019	2.08526	0.337138	Sensitive		dasatinib	IC50	PTN7	5.27253	0.0165116	-0.815429	-2.70396	1.88853	Resistant
			dasatinib	LN_EC50	SYT13	3.70667	0.0160372	1.0393	0.318682	3.26126	Resistant		dasatinib	IC50	CFAH	-2.66199	0.0244408	-1.19741	0.0207435	-1.21815	Sensitive
			dasatinib	LN_EC50	NRXN3	2.74428	0.0333965	1.79989	0.0625856	28.7589	Resistant		dasatinib	IC50	PIN1	3.58687	0.00306567	0.681617	-0.44883	1.13045	Resistant
			dasatinib	LN_EC50	SCML1	2.71279	0.039665	3.2765	1.60453	2.04203	Resistant		dasatinib	IC50	Q5LJA9	3.26973	0.0128847	0.216832	-0.787528	1.00436	Resistant
			dasatinib	LN_EC50	FSTL4	2.42764	0.0463248	1.08995	0.314485	3.46584	Resistant		dasatinib	IC50	LPP2	-2.24484	0.0435419	-0.105657	1.08173	-1.18739	Sensitive
			dasatinib	LN_EC50	PHF21B	3.61514	0.00696812	1.16679	0.310984	3.75191	Resistant		dasatinib	IC50	PIN4	2.66894	0.0201327	0.549645	-0.666865	1.21651	Resistant
			dasatinib	LN_EC50	PSD	3.48843	0.00721563	1.87048	0.857926	2.18023	Resistant		dasatinib	IC50	E9PLM6	-2.30551	0.0372275	-0.199393	1.39176	-1.59115	Sensitive
			dasatinib	LN_EC50	RIMBP2	3.19093	0.0119306	0.0425468	0.0179088	2.37576	Resistant		dasatinib	IC50	ISOC1	3.0351	0.0144012	0.853699	-0.658436	1.51213	Resistant
			dasatinib	LN_EC50	PRDM6	2.40323	0.0467164	1.43084	0.303721	4.71104	Resistant		dasatinib	IC50	LYPL1	3.21919	0.00908958	0.493111	-0.527967	1.02108	Resistant
			dasatinib	LN_EC50	MPPED2	4.07183	0.0055929	2.67783	0.208567	12.8392	Resistant		dasatinib	IC50	NECP1	3.30779	0.0105874	0.571676	-0.575508	1.14718	Resistant
			dasatinib	LN_EC50	PDZD4	6.02517	0.000793044	2.49316	0.271708	9.17588	Resistant		dasatinib	IC50	CB39L	2.63767	0.0414426	0.905752	-0.81525	1.721	Resistant
			dasatinib	LN_EC50	VASH1	2.34792	0.0466503	1.56369	0.651792	2.39907	Resistant		dasatinib	IC50	LOXL1	15.9831	0.0173469	0.266846	-0.802164	1.06901	Resistant
			dasatinib	LN_EC50	ASIC4	5.69963	0.000340964	0.204176	0.0564168	3.61906	Resistant		dasatinib	IC50	ARHG8	-16.9705	0.00044564	-0.143936	1.6997	-1.84364	Sensitive
			dasatinib	LN_EC50	CDHR2	2.94687	0.0232397	0.592331	0.273625	2.16475	Resistant		dasatinib	IC50	IBP2	3.27922	0.00552484	0.718113	-0.901856	1.61997	Resistant
			dasatinib	LN_EC50	CACNG4	2.67704	0.033107	5.50613	2.29121	2.40316	Resistant		dasatinib	IC50	BACH1	-4.81295	0.00151625	-0.58244	0.544902	-1.12734	Sensitive
			dasatinib	LN_EC50	TUBA3D	2.74273	0.0263154	0.756357	0.324132	2.33348	Resistant		dasatinib	IC50	CTDSL	-8.99578	0.000161311	0.124048	1.48251	-1.35846	Sensitive
			dasatinib	LN_EC50	ACTL6B	4.03643	0.00556577	0.0679257	0.00358882	18.927	Resistant		dasatinib	IC50	CHSP1	4.3016	0.00109381	0.456626	-0.790311	1.24694	Resistant
			dasatinib	LN_EC50	PAK3	2.62738	0.0389354	0.48594	0.0178034	27.2948	Resistant		dasatinib	IC50	CXA1	-2.29798	0.0389635	-1.76847	-0.188201	-1.58027	Sensitive
			dasatinib	LN_EC50	AMPH	2.77497	0.0215808	0.0834409	0.024877	3.35414	Resistant		dasatinib	IC50	NR1H2	-4.53595	0.00292695	-0.287072	1.17808	-1.46515	Sensitive
			dasatinib	LN_EC50	ADCYAP1R1	2.52392	0.045048	0.0122641	0	Inf	Resistant		dasatinib	IC50	PSD10	4.56401	0.000697544	0.601195	-0.711366	1.31256	Resistant
			dasatinib	LN_EC50	KCNN2	3.29513	0.00976615	0.155181	0.0631585	2.45701	Resistant		dasatinib	IC50	MBP	-3.01538	0.00926475	-0.698717	1.0135	-1.71221	Sensitive
			dasatinib	LN_EC50	IGSF9B	2.3344	0.049012	0.989704	0.353415	2.8004	Resistant		dasatinib	IC50	DCTN2	5.50063	7.82774e-05	0.747674	-0.447414	1.19509	Resistant
			dasatinib	LN_EC50	PCDHA6	2.50369	0.042176	1.52151	0.193185	7.87593	Resistant		dasatinib	IC50	RTN4R	-2.55506	0.0410162	0.178352	1.38825	-1.2099	Sensitive
			dasatinib	LN_EC50	PCDHGA2	2.58915	0.0400543	1.42736	0.159351	8.95735	Resistant		dasatinib	IC50	PHKG2	4.976	0.000217145	0.888767	-0.401505	1.29027	Resistant
			dasatinib	LN_EC50	PGR	3.38645	0.0147385	2.06214	0.0107665	191.533	Resistant		dasatinib	IC50	PLCD1	-4.28703	0.000863465	-0.264658	0.919547	-1.18421	Sensitive
			dasatinib	LN_EC50	KCNK2	5.10116	0.00186045	3.73401	0.201488	18.5321	Resistant		dasatinib	IC50	STON2	-3.54228	0.00636036	-0.612186	0.993485	-1.60567	Sensitive
			dasatinib	LN_EC50	NKAIN1	2.53094	0.0438683	2.57889	0.260424	9.90265	Resistant		dasatinib	IC50	ELMO3	2.9122	0.0316497	0.514297	-0.984995	1.49929	Resistant
			dasatinib	LN_EC50	ITGA6	-2.90984	0.0188268	2.47753	5.59895	0.442499	Sensitive		dasatinib	IC50	CP24A	-5.16535	0.00667334	-1.00512	-0.00302002	-1.0021	Sensitive
			dasatinib	LN_EC50	TDRD1	2.63313	0.0388883	1.74124	0.0107311	162.261	Resistant		dasatinib	IC50	FABP6	-3.45152	0.00798737	-1.05725	0.229015	-1.28627	Sensitive
			dasatinib	LN_EC50	CPNE6	-3.01281	0.0479575	0.0121849	0.103436	0.117801	Sensitive		dasatinib	IC50	NUCKS	2.65155	0.0197057	0.329357	-0.981898	1.31126	Resistant
			dasatinib	LN_EC50	SYNDIG1	2.64448	0.0310991	0.0304016	0.00358882	8.47118	Resistant		dasatinib	IC50	HDHD2	2.81947	0.0144062	0.182913	-1.17081	1.35372	Resistant
			dasatinib	LN_EC50	NOL4	2.3908	0.045232	0.469973	0.100953	4.65536	Resistant		dasatinib	IC50	APOH	-4.11358	0.00115474	-1.02528	0.763165	-1.78845	Sensitive
			dasatinib	LN_EC50	ATP11C	2.43683	0.0419134	3.4921	1.26267	2.76565	Resistant		dasatinib	IC50	PYRD2	-3.31412	0.0268561	-0.62729	2.35955	-2.98684	Sensitive
			dasatinib	LN_EC50	SCML2	4.1473	0.0127889	2.59455	0.821973	3.15649	Resistant		dasatinib	IC50	ABHEB	3.58365	0.00302542	0.387571	-0.886147	1.27372	Resistant
			dasatinib	LN_EC50	RS1	2.82843	0.0300197	0.00820302	0	Inf	Resistant		dasatinib	IC50	IFT27	4.12416	0.00130986	0.38227	-0.855509	1.23778	Resistant
			dasatinib	LN_EC50	AQP8	3.26726	0.0104495	0.0564505	0.0214269	2.63457	Resistant		dasatinib	IC50	ATG12	3.97145	0.00228632	0.387002	-0.628058	1.01506	Resistant
			dasatinib	LN_EC50	AP3B2	4.09478	0.00304641	2.10769	0.638211	3.30249	Resistant		dasatinib	IC50	DEST	2.34119	0.0361282	0.767369	-0.280801	1.04817	Resistant
			dasatinib	LN_EC50	CLIP3	2.75926	0.0227289	2.60688	0.980108	2.65979	Resistant		dasatinib	IC50	COF1	4.83856	0.000290442	0.750213	-0.615124	1.36534	Resistant
			dasatinib	LN_EC50	CLEC11A	3.06055	0.0136468	2.1379	0.48207	4.43482	Resistant		dasatinib	IC50	ERO1A	-5.89826	5.0656e-05	-0.80336	0.366045	-1.1694	Sensitive
			dasatinib	LN_EC50	HOXA13	-3.54884	0.0215395	0.170024	1.08751	0.156343	Sensitive		dasatinib	IC50	GUAD	-2.99758	0.0139785	-1.34896	0.124777	-1.47373	Sensitive
			dasatinib	LN_EC50	PAX4	2.43546	0.0392283	0.0223975	0.00358882	6.2409	Resistant		dasatinib	IC50	ARHGQ	-2.74759	0.0290952	-0.0793183	1.1684	-1.24772	Sensitive
			dasatinib	LN_EC50	SFRP4	2.56981	0.0414752	1.00105	0.0722213	13.8609	Resistant		dasatinib	IC50	SLD5	2.9755	0.0100483	0.461919	-0.748692	1.21061	Resistant
			dasatinib	LN_EC50	CNTNAP3	-2.62393	0.0381109	0.97028	3.17335	0.305759	Sensitive		dasatinib	IC50	CYGB	-6.44078	0.0232678	-0.917837	0.757143	-1.67498	Sensitive
			dasatinib	LN_EC50	TYRP1	2.69029	0.0289817	0.695216	0.259628	2.67774	Resistant		dasatinib	IC50	PKP1	-3.05941	0.021088	-1.55136	0.482905	-2.03427	Sensitive
			dasatinib	LN_EC50	APBA1	3.97825	0.00381721	1.23747	0.415288	2.97978	Resistant		dasatinib	IC50	CAH8	2.62391	0.0222449	0.321422	-0.82738	1.1488	Resistant
			dasatinib	LN_EC50	CXCL12	2.61301	0.0319092	2.64488	0.491498	5.38127	Resistant		dasatinib	IC50	PVRL3	-2.75458	0.0349456	-0.410202	0.880049	-1.29025	Sensitive
			dasatinib	LN_EC50	RUNDC3A	2.99735	0.0227571	1.3725	0.587252	2.33716	Resistant		dasatinib	IC50	AAED1	-5.38721	0.0327721	0.3441	1.80528	-1.46118	Sensitive
			dasatinib	LN_EC50	IL2	-1.47205	0.227008	1.02468	2.65797	0.385512	Sensitive		dasatinib	IC50	ANKH	-2.78469	0.0289353	-1.38523	0.46622	-1.85145	Sensitive
			dasatinib	LN_EC50	HGFAC	2.62918	0.0281151	0.676124	0.259484	2.60565	Resistant		dasatinib	IC50	TNR3	-2.71135	0.0189083	-0.110468	1.33577	-1.44624	Sensitive
			dasatinib	LN_EC50	DTX4	-2.91562	0.0361521	1.18764	3.54295	0.335213	Sensitive		dasatinib	IC50	F105A	-3.95236	0.00308782	-0.678771	0.771054	-1.44983	Sensitive
			dasatinib	LN_EC50	ACSS3	2.54307	0.0376714	3.24381	1.01858	3.18462	Resistant		dasatinib	IC50	NB5R2	2.99602	0.0109916	0.773937	-0.621325	1.39526	Resistant
			dasatinib	LN_EC50	PRMT8	-3.04695	0.0226104	0.00615227	0.0214622	0.286656	Sensitive		dasatinib	IC50	GSKIP	2.42143	0.0450071	0.229481	-1.2696	1.49908	Resistant
			dasatinib	LN_EC50	RBM24	3.19363	0.0114944	3.07644	1.10961	2.77255	Resistant		dasatinib	IC50	P55G	-2.87523	0.0212921	0.247822	1.33771	-1.08989	Sensitive
			dasatinib	LN_EC50	COL9A1	3.10835	0.0149175	0.0324523	0.00358882	9.04261	Resistant		dasatinib	IC50	KLDC4	5.05331	0.000287094	0.801131	-0.620058	1.42119	Resistant
			dasatinib	LN_EC50	SMOC2	2.92223	0.0171481	2.53173	0.684373	3.69935	Resistant		dasatinib	IC50	ABRAL	2.69796	0.0212236	0.702594	-0.791923	1.49452	Resistant
			dasatinib	LN_EC50	NME5	4.55307	0.00387923	0.747305	0	Inf	Resistant		dasatinib	IC50	KLK5	-109.053	0.00583753	-0.155881	6.25549	-6.41137	Sensitive
			dasatinib	LN_EC50	PCDHB3	3.39612	0.00837402	3.13673	0.523035	5.99717	Resistant		dasatinib	IC50	DAF	-3.97758	0.00147451	-0.126574	1.34619	-1.47276	Sensitive
			dasatinib	LN_EC50	SLC27A6	4.28938	0.00258835	1.34192	0.222786	6.02336	Resistant		dasatinib	IC50	DPH6	4.95131	0.00116114	0.769523	-0.706146	1.47567	Resistant
			dasatinib	LN_EC50	HRH2	3.71482	0.00722385	0.163346	0.0425417	3.83967	Resistant		dasatinib	IC50	RNZ1	5.52973	0.0311818	-0.611405	-1.63875	1.02735	Resistant
			dasatinib	LN_EC50	GNAT1	2.81624	0.0297557	0.166656	0.0143199	11.638	Resistant		dasatinib	IC50	IKZF5	-2.90873	0.0261656	-0.988133	0.208548	-1.19668	Sensitive
			dasatinib	LN_EC50	IGFBP5	2.32372	0.0453977	6.77743	2.96025	2.28948	Resistant		dasatinib	IC50	AP3S2	2.87346	0.015295	0.322222	-1.06043	1.38266	Resistant
			dasatinib	LN_EC50	PLCD4	2.54236	0.0385554	1.63128	0.477901	3.41342	Resistant		dasatinib	IC50	CC106	2.57589	0.0374694	0.635431	-0.909003	1.54443	Resistant
			dasatinib	LN_EC50	DLGAP3	2.90786	0.0245051	0.592429	0.0860419	6.88536	Resistant		dasatinib	IC50	EPCR	-3.05208	0.0127592	-0.939566	0.262441	-1.20201	Sensitive
			dasatinib	LN_EC50	SIPA1L2	3.31283	0.0155955	4.28896	1.86248	2.30282	Resistant		dasatinib	IC50	FA86A	74.7737	0.00851344	0.411473	-0.794578	1.20605	Resistant
			dasatinib	LN_EC50	SLC5A9	3.01046	0.0189206	0.0544397	0.0142499	3.82036	Resistant		dasatinib	IC50	PAIP2	3.14941	0.00781979	0.584937	-0.494552	1.07949	Resistant
			dasatinib	LN_EC50	GRIA2	2.80218	0.0247386	0.157908	0.0318472	4.95829	Resistant		dasatinib	IC50	PERP	-5.20569	0.0067851	-1.41596	1.16298	-2.57893	Sensitive
			dasatinib	LN_EC50	GHSR	3.43248	0.00862475	0.0445393	0.0107311	4.15048	Resistant		dasatinib	IC50	XDH	-15.0787	0.0421581	-0.405131	2.66491	-3.07004	Sensitive
			dasatinib	LN_EC50	TNFSF10	-5.43469	0.000442412	1.65543	5.27575	0.313781	Sensitive		dasatinib	IC50	CC138	-3.31676	0.00899618	-0.533801	1.035	-1.5688	Sensitive
			dasatinib	LN_EC50	NUDT10	2.61589	0.0388811	0.809312	0.0379647	21.3175	Resistant		dasatinib	IC50	PI42C	3.25368	0.0143249	1.25249	-0.133055	1.38554	Resistant
			dasatinib	LN_EC50	NECAB1	3.80167	0.00628702	2.75735	0.342404	8.05294	Resistant		dasatinib	IC50	MDM2	2.71005	0.036338	0.168388	-1.72139	1.88978	Resistant
			dasatinib	LN_EC50	RAB9B	2.99762	0.0170629	0.569089	0.176471	3.22482	Resistant		dasatinib	IC50	TNR5	-3.09925	0.00864922	-1.20566	0.690681	-1.89634	Sensitive
			dasatinib	LN_EC50	KCNK15	3.13084	0.0163891	2.21429	0.236182	9.37535	Resistant		dasatinib	IC50	FOLR1	-2.89741	0.0134287	-0.227641	2.88958	-3.11722	Sensitive
			dasatinib	LN_EC50	POF1B	2.43682	0.0447534	3.57379	1.45356	2.45864	Resistant		dasatinib	IC50	TRI58	86.9407	0.00732214	3.15608	-0.257516	3.4136	Resistant
			dasatinib	LN_EC50	H1.3	2.2846	0.0482782	2.56337	1.11024	2.30884	Resistant		dasatinib	IC50	SPY4	-2.7964	0.0164298	-1.2925	0.163096	-1.4556	Sensitive
			dasatinib	LN_EC50	KCNK17	2.787	0.0317028	0.0970267	0	Inf	Resistant		dasatinib	IC50	MEGF6	-3.11062	0.0454226	-0.173475	1.76877	-1.94224	Sensitive
			dasatinib	LN_EC50	FFAR2	3.1864	0.0113897	0.635291	0.150544	4.21997	Resistant		dasatinib	IC50	CHFR	5.80089	0.000818295	0.583061	-0.423359	1.00642	Resistant
			dasatinib	LN_EC50	ARMCX1	3.60071	0.00575443	3.00818	0.727424	4.13539	Resistant		dasatinib	IC50	ZCH10	-15.1149	0.0420574	-0.291294	0.951457	-1.24275	Sensitive
			dasatinib	LN_EC50	TRPV5	2.47114	0.0379885	0.0163656	0.00358882	4.56017	Resistant		dasatinib	IC50	TLR3	-3.88223	0.00530085	-0.446872	1.83782	-2.28469	Sensitive
			dasatinib	LN_EC50	GNG13	2.4386	0.0415796	1.59783	0.654298	2.44205	Resistant		dasatinib	IC50	GP126	-2.78979	0.018109	-0.733051	0.924601	-1.65765	Sensitive
			dasatinib	LN_EC50	GNGT1	3.07922	0.0131566	0.713326	0.13456	5.30118	Resistant		dasatinib	IC50	BLVRB	2.61055	0.0285557	0.74103	-0.678041	1.41907	Resistant
			dasatinib	LN_EC50	RFPL3	2.82843	0.0300197	0.0323334	0	Inf	Resistant		dasatinib	IC50	CP2S1	-3.1529	0.00785189	-0.869509	0.698067	-1.56758	Sensitive
			dasatinib	LN_EC50	VGF	2.48003	0.0351335	2.17611	0.654413	3.32528	Resistant		dasatinib	IC50	TTC37	5.68473	5.92046e-05	0.572432	-0.873655	1.44609	Resistant
			dasatinib	LN_EC50	CD68	-2.66495	0.0334228	2.02286	4.70719	0.42974	Sensitive		dasatinib	IC50	IFIH1	2.21507	0.0488349	0.832089	-0.305679	1.13777	Resistant
			dasatinib	LN_EC50	CBFA2T3	2.42932	0.04102	2.35029	0.530342	4.43165	Resistant		dasatinib	IC50	THIO	4.82897	0.000273194	0.394183	-0.816973	1.21116	Resistant
			dasatinib	LN_EC50	OLFM1	5.11083	0.0019641	4.8346	0.258302	18.7169	Resistant		dasatinib	IC50	TGFR2	-5.03965	0.000425314	-0.960101	0.556573	-1.51667	Sensitive
			dasatinib	LN_EC50	LSP1	2.59187	0.0303912	0.736394	0.184373	3.99405	Resistant		dasatinib	IC50	TICN1	2.7169	0.0449312	1.70873	-0.541604	2.25034	Resistant
			dasatinib	LN_EC50	TNS4	-3.34107	0.010713	1.30062	3.60859	0.360422	Sensitive		dasatinib	IC50	UPAR	-3.04098	0.00997282	-1.24255	0.608915	-1.85146	Sensitive
			dasatinib	LN_EC50	RAI2	5.8412	0.000991018	0.90407	0.0492745	18.3476	Resistant		dasatinib	IC50	HG2A	-3.9701	0.00168839	-1.14487	0.444097	-1.58896	Sensitive
			dasatinib	LN_EC50	RTBDN	-3.5226	0.013834	0.58553	1.41518	0.413751	Sensitive		dasatinib	IC50	BT3A3	-3.58781	0.00425534	-0.231099	1.2009	-1.432	Sensitive
			dasatinib	LN_EC50	PPARG	-1.10034	0.325024	0.13694	0.356949	0.383641	Sensitive		dasatinib	IC50	BT3A2	-2.78592	0.0289862	-0.281005	1.3317	-1.6127	Sensitive
			dasatinib	LN_EC50	RAMP1	3.25616	0.0132146	3.64305	0.617319	5.9014	Resistant		dasatinib	IC50	DOLK	-2.99597	0.016342	-0.112	0.930525	-1.04252	Sensitive
			dasatinib	LN_EC50	NMUR2	2.72668	0.0296359	0.0325308	0.00714229	4.55468	Resistant		dasatinib	IC50	LMCD1	2.56562	0.0264945	0.954944	-0.584978	1.53992	Resistant
			dasatinib	LN_EC50	CHIT1	4.64088	0.0024419	0.126906	0.0107311	11.826	Resistant		dasatinib	IC50	B7Z2R4	-4.65781	0.000832381	-0.404157	0.823068	-1.22723	Sensitive
			dasatinib	LN_EC50	PLAAT4	-2.79928	0.0444346	2.63733	5.75154	0.458543	Sensitive		dasatinib	IC50	VSIG2	-44.3402	0.000508245	-0.481751	5.22144	-5.70319	Sensitive
			dasatinib	LN_EC50	PDZD2	-3.09779	0.0186111	1.33733	3.26833	0.40918	Sensitive		dasatinib	IC50	J3KT72	2.62068	0.0412305	0.137557	-0.951503	1.08906	Resistant
			dasatinib	LN_EC50	SFTPD	3.01141	0.0222724	1.36316	0.207288	6.5762	Resistant		dasatinib	IC50	CLD6	4.15865	0.0252852	0.152973	-1.84913	2.00211	Resistant
			dasatinib	LN_EC50	DGLUCY	-3.68471	0.00504859	2.05735	4.38623	0.469047	Sensitive		dasatinib	IC50	CU059	3.13785	0.00734113	0.0712582	-0.932616	1.00387	Resistant
			dasatinib	LN_EC50	PTPN22	5.09314	0.00144172	0.318	0.0424083	7.49853	Resistant		dasatinib	IC50	CLDN1	-3.30646	0.0128562	-0.270171	0.837447	-1.10762	Sensitive
			dasatinib	LN_EC50	DTNA	3.95464	0.0106719	3.69554	0.914341	4.04175	Resistant		dasatinib	IC50	UFC1	3.24987	0.00631849	0.516624	-0.574239	1.09086	Resistant
			dasatinib	LN_EC50	AMHR2	-2.67365	0.0273872	0.00609205	0.0285345	0.213498	Sensitive		dasatinib	IC50	TPMT	8.22958	1.23768e-06	0.57095	-0.676808	1.24776	Resistant
			dasatinib	LN_EC50	PKIB	3.03661	0.0324469	4.88259	2.18261	2.23705	Resistant		dasatinib	IC50	VTCN1	10.8485	0.0083686	4.24752	-0.510769	4.75828	Resistant
			dasatinib	LN_EC50	NEK3	2.8545	0.0231966	3.90024	1.83488	2.12562	Resistant		dasatinib	IC50	TBC30	3.23684	0.0230299	1.00042	-0.822531	1.82295	Resistant
			dasatinib	LN_EC50	SIT1	2.43397	0.0453644	0.0444794	0.0106611	4.17213	Resistant		dasatinib	IC50	MCM9	-5.92826	0.0272945	-0.0526696	1.173	-1.22567	Sensitive
			dasatinib	LN_EC50	PI15	4.28484	0.00409736	1.22812	0.120606	10.183	Resistant		dasatinib	IC50	FOSL2	-3.05943	0.0103672	-0.470287	0.751624	-1.22191	Sensitive
			dasatinib	LN_EC50	TMPRSS4	-2.54961	0.0492473	1.73911	4.47384	0.388729	Sensitive		dasatinib	IC50	ARL6	6.08996	9.05372e-05	0.33632	-0.90521	1.24153	Resistant
			dasatinib	LN_EC50	TRPC6	4.84761	0.00197579	0.329195	0.0211862	15.5382	Resistant		dasatinib	IC50	RNLS	-4.70534	0.00329763	-0.0882312	2.12792	-2.21616	Sensitive
			dasatinib	LN_EC50	FXYD6	2.42986	0.0396021	3.2557	1.05594	3.08322	Resistant		dasatinib	IC50	TCP4	4.23746	0.000841655	0.50871	-0.692607	1.20132	Resistant
			dasatinib	LN_EC50	CYP19A1	2.50907	0.0364472	0.315247	0.068722	4.58728	Resistant		dasatinib	IC50	GGPPS	3.42479	0.00541921	0.820191	-0.627199	1.44739	Resistant
			dasatinib	LN_EC50	TET1	3.38305	0.00919365	1.07487	0.436563	2.46211	Resistant		dasatinib	IC50	TINAL	-4.59961	0.000581626	-0.652311	0.901919	-1.55423	Sensitive
			dasatinib	LN_EC50	PCDH10	2.83102	0.0226262	1.76982	0.335295	5.2784	Resistant		dasatinib	IC50	PARVG	18.0776	0.03518	-0.612913	-1.81815	1.20523	Resistant
			dasatinib	LN_EC50	BMPR1B	2.38851	0.0422327	1.38665	0.552575	2.50943	Resistant		dasatinib	IC50	UBP14	3.6645	0.00286292	0.859044	-0.332733	1.19178	Resistant
			dasatinib	LN_EC50	ANP32D	3.84543	0.00429078	0.0244878	0.00358882	6.82336	Resistant		dasatinib	IC50	CHUR	3.2411	0.0103457	0.428045	-1.1221	1.55014	Resistant
			dasatinib	LN_EC50	SRRM4	3.18666	0.0149087	0.0502819	0.00717764	7.00534	Resistant		dasatinib	IC50	FUCO	-3.36721	0.00490385	-0.631554	0.920517	-1.55207	Sensitive
			dasatinib	LN_EC50	GCNT3	-2.63119	0.029194	0.119049	0.349575	0.340554	Sensitive		dasatinib	IC50	KDEL2	-2.60374	0.0319417	-0.500711	0.602732	-1.10344	Sensitive
			dasatinib	LN_EC50	GATA6	-2.56691	0.0482854	1.23285	2.75882	0.446877	Sensitive		dasatinib	IC50	A7L3B	2.36528	0.0406968	0.17056	-1.02146	1.19202	Resistant
			dasatinib	LN_EC50	PTH2	2.76741	0.0325335	0.0557416	0	Inf	Resistant		dasatinib	IC50	RIPK3	-3.22785	0.0183162	-0.786732	0.773137	-1.55987	Sensitive
			dasatinib	LN_EC50	RCN3	-2.70084	0.0285148	1.81508	4.92278	0.36871	Sensitive		dasatinib	IC50	STAR5	9.21561	0.0459076	0.635831	-1.03192	1.66775	Resistant
			dasatinib	LN_EC50	PRDM16	3.62702	0.00648531	0.275186	0.0488854	5.6292	Resistant		dasatinib	IC50	PMVK	3.13361	0.0108113	0.740793	-0.441126	1.18192	Resistant
			dasatinib	LN_EC50	KCNH1	2.76547	0.0219221	0.703232	0.169545	4.14777	Resistant		dasatinib	IC50	FA10	5.92741	0.027302	-0.34004	-1.72982	1.38978	Resistant
			dasatinib	LN_EC50	ANKRD53	2.85823	0.0214089	0.499928	0.144789	3.45282	Resistant		dasatinib	IC50	PNPO	2.63128	0.0212035	0.18855	-0.819921	1.00847	Resistant
			dasatinib	LN_EC50	SLC4A10	3.28305	0.0162662	0.787578	0.0560496	14.0515	Resistant		dasatinib	IC50	CANB2	4.21129	0.00923697	0.906855	-0.831654	1.73851	Resistant
			dasatinib	LN_EC50	DCDC2	2.83218	0.0198025	2.95079	1.04241	2.83073	Resistant		dasatinib	IC50	D3YTA9	4.32048	0.00134932	0.382716	-0.645643	1.02836	Resistant
			dasatinib	LN_EC50	KAAG1	2.38169	0.0418617	0.518434	0.17067	3.03764	Resistant		dasatinib	IC50	CD151	-2.54804	0.0255854	-0.216651	0.844524	-1.06117	Sensitive
			dasatinib	LN_EC50	MLIP	-3.88567	0.0129294	0.0358517	0.334241	0.107263	Sensitive		dasatinib	IC50	PORCN	-3.16187	0.00819623	-0.468313	0.650645	-1.11896	Sensitive
			dasatinib	LN_EC50	HMGCLL1	5.13219	0.00133657	1.74536	0.155128	11.2511	Resistant		dasatinib	IC50	RNF6	-3.4157	0.0196854	-0.659069	0.972868	-1.63194	Sensitive
			dasatinib	LN_EC50	ASB10	4.09423	0.00639874	0.0244482	0	Inf	Resistant		dasatinib	IC50	NACP1	4.80484	0.000561151	0.321815	-0.812903	1.13472	Resistant
			dasatinib	LN_EC50	SYTL5	4.5525	0.00363793	3.08899	0.579093	5.33419	Resistant		dasatinib	IC50	PEA15	3.5855	0.00298842	0.647284	-0.80175	1.44903	Resistant
			dasatinib	LN_EC50	GPR119	2.82843	0.0300197	0.00820302	0	Inf	Resistant		dasatinib	IC50	SMAP2	5.74226	6.61457e-05	0.520206	-0.728632	1.24884	Resistant
			dasatinib	LN_EC50	PRDM14	2.52392	0.045048	0.0122641	0	Inf	Resistant		dasatinib	IC50	BOLA2	4.15487	0.00115276	0.78226	-0.872345	1.6546	Resistant
			dasatinib	LN_EC50	FAM13C	2.87035	0.0282886	1.75871	0.0313466	56.1052	Resistant		dasatinib	IC50	GDIA	2.98988	0.010285	0.704581	-0.368225	1.07281	Resistant
			dasatinib	LN_EC50	ITPRIP	-2.48458	0.0348056	1.54549	3.14238	0.491822	Sensitive		dasatinib	IC50	GAS2	14.107	0.0450526	-0.82842	-8.00898	7.18056	Resistant
			dasatinib	LN_EC50	KLHL35	2.29396	0.0476646	2.40109	1.14844	2.09075	Resistant		dasatinib	IC50	ELF4	-6.09402	0.0036672	-0.305131	0.914446	-1.21958	Sensitive
			dasatinib	LN_EC50	FAM124A	2.92369	0.0243937	0.608065	0.0759626	8.00479	Resistant		dasatinib	IC50	FEM1A	8.76383	0.00312895	0.573611	-0.506891	1.0805	Resistant
			dasatinib	LN_EC50	ADRA2A	2.98211	0.0245245	0.402984	0.0179088	22.5021	Resistant		dasatinib	IC50	FBX4	3.35029	0.00818409	0.360933	-0.867158	1.22809	Resistant
			dasatinib	LN_EC50	NPAS3	3.31344	0.0143263	0.389419	0.0386526	10.0748	Resistant		dasatinib	IC50	TPC6A	4.11075	0.00660764	0.398638	-0.885953	1.28459	Resistant
			dasatinib	LN_EC50	NR3C2	3.10265	0.0189827	0.969081	0.140996	6.8731	Resistant		dasatinib	IC50	CDN1B	2.51537	0.0249377	0.796184	-0.30801	1.10419	Resistant
			dasatinib	LN_EC50	TUBA3E	2.56071	0.0414176	0.546217	0.0453552	12.0431	Resistant		dasatinib	IC50	F134B	20.2107	0.00243919	0.854083	-2.33732	3.1914	Resistant
			dasatinib	LN_EC50	TMEM163	2.82491	0.0291836	0.429548	0.0317825	13.5152	Resistant		dasatinib	IC50	ARY1	2.91043	0.0238203	1.36126	-0.514743	1.876	Resistant
			dasatinib	LN_EC50	HSPB8	3.21075	0.0106463	5.93083	1.51624	3.91154	Resistant		dasatinib	IC50	UBE2C	3.09472	0.0122687	0.977953	-0.33351	1.31146	Resistant
			dasatinib	LN_EC50	TRIM36	2.83412	0.0284907	1.97151	0.807882	2.44035	Resistant		dasatinib	IC50	RET4	-3.17045	0.0301575	-0.444881	0.685447	-1.13033	Sensitive
			dasatinib	LN_EC50	SPARCL1	4.71163	0.00145026	0.365066	0.0592529	6.16115	Resistant		dasatinib	IC50	BIEA	2.31425	0.0372585	0.71985	-0.561806	1.28166	Resistant
			dasatinib	LN_EC50	ACMSD	2.69508	0.0350014	0.264582	0.0460618	5.74406	Resistant		dasatinib	IC50	E9PEJ6	-3.71225	0.002913	-0.214592	0.895851	-1.11044	Sensitive
			dasatinib	LN_EC50	CD8A	3.38218	0.00821827	1.04893	0.304501	3.44475	Resistant		dasatinib	IC50	PRPS1	2.67337	0.0182017	0.402	-0.676737	1.07874	Resistant
			dasatinib	LN_EC50	MCOLN2	3.81479	0.00413348	1.61694	0.404352	3.99883	Resistant		dasatinib	IC50	ARL3	2.1633	0.0487679	0.706295	-0.482575	1.18887	Resistant
			dasatinib	LN_EC50	GPR26	2.82843	0.0300197	0.00820302	0	Inf	Resistant		dasatinib	IC50	TCAL5	4.17335	0.00117288	2.03427	-0.100666	2.13493	Resistant
			dasatinib	LN_EC50	MOV10	-1.27386	0.289125	0.0428534	0.298063	0.143773	Sensitive		dasatinib	IC50	POMT1	2.68366	0.0389751	0.502553	-0.675414	1.17797	Resistant
			dasatinib	LN_EC50	FLACC1	2.62098	0.0367967	0.945704	0.430858	2.19493	Resistant		dasatinib	IC50	PEDF	-7.48221	0.00170611	-0.738603	0.454657	-1.19326	Sensitive
			dasatinib	LN_EC50	RAB39B	2.77679	0.0215175	1.31052	0.247083	5.30395	Resistant		dasatinib	IC50	CNDP2	2.39009	0.0316095	0.50031	-0.668537	1.16885	Resistant
			dasatinib	LN_EC50	MMP16	2.9814	0.0220988	2.05191	0.213552	9.60848	Resistant		dasatinib	IC50	PGTB2	3.08982	0.00894241	0.447	-0.580482	1.02748	Resistant
			dasatinib	LN_EC50	NODAL	2.43705	0.0449921	0.551751	0.164556	3.35297	Resistant		dasatinib	IC50	PTN3	-5.26511	0.00330384	-0.153601	1.8375	-1.9911	Sensitive
			dasatinib	LN_EC50	CATIP	2.37889	0.0422292	0.105821	0.0354007	2.98922	Resistant		dasatinib	IC50	FCGRN	-2.68531	0.0243319	-1.42982	1.26962	-2.69944	Sensitive
			dasatinib	LN_EC50	WNT9B	2.52392	0.045048	0.0122641	0	Inf	Resistant		dasatinib	IC50	DNAL1	3.03699	0.0161667	0.368854	-0.643764	1.01262	Resistant
			dasatinib	LN_EC50	STC1	2.45282	0.0368003	3.69864	1.25423	2.94893	Resistant		dasatinib	IC50	MTPN	3.74317	0.00287731	0.202254	-0.980538	1.18279	Resistant
			dasatinib	LN_EC50	ZNF233	3.86663	0.00424642	1.35915	0.560719	2.42394	Resistant		dasatinib	IC50	EFNB2	-2.93142	0.014231	-0.198931	1.62217	-1.8211	Sensitive
			dasatinib	LN_EC50	CHRNB2	3.83282	0.00485504	0.255898	0.0768378	3.33036	Resistant		dasatinib	IC50	BAG2	-2.59687	0.0341688	-1.09825	0.414351	-1.51261	Sensitive
			dasatinib	LN_EC50	PTH1R	3.04728	0.0139247	0.436213	0.150501	2.8984	Resistant		dasatinib	IC50	PLS1	-2.21528	0.0462879	-0.585474	0.574135	-1.15961	Sensitive
			dasatinib	LN_EC50	COL26A1	2.393	0.0417099	1.99685	0.415105	4.81046	Resistant		dasatinib	IC50	IPKG	13.1006	0.0485006	1.08187	-0.392957	1.47483	Resistant
			dasatinib	LN_EC50	PGLYRP2	2.68939	0.0357617	1.77786	0.0855704	20.7766	Resistant		dasatinib	IC50	LUM	-3.23796	0.0104738	-0.805534	1.4301	-2.23563	Sensitive
			dasatinib	LN_EC50	GRIN2C	3.40474	0.0138202	1.10291	0.203779	5.41228	Resistant		dasatinib	IC50	HPSE	-3.47033	0.017015	-0.52645	1.49408	-2.02053	Sensitive
			dasatinib	LN_EC50	ELAVL4	2.4048	0.0449235	0.0713269	0.0142846	4.99328	Resistant		dasatinib	IC50	IFM3	-4.13463	0.00150891	-0.841876	0.97759	-1.81947	Sensitive
			dasatinib	LN_EC50	BSND	2.52392	0.045048	0.0122641	0	Inf	Resistant		dasatinib	IC50	B7Z1Y9	-6.04935	0.026255	0.0688901	3.00757	-2.93868	Sensitive
			dasatinib	LN_EC50	DHRS3	-3.76323	0.00486362	2.49959	6.01294	0.415701	Sensitive		dasatinib	IC50	LRC53	-5.54081	0.031063	-0.744321	1.24393	-1.98825	Sensitive
			dasatinib	LN_EC50	TTLL10	2.92532	0.0188723	0.77141	0.340778	2.26368	Resistant		dasatinib	IC50	SPS2	4.72202	0.000393419	0.626463	-0.649729	1.27619	Resistant
			dasatinib	LN_EC50	NTNG1	2.4891	0.0432982	0.222169	0.0820454	2.70788	Resistant		dasatinib	IC50	SET	2.98832	0.024232	0.178903	-1.00323	1.18214	Resistant
			dasatinib	LN_EC50	TDRD5	4.61283	0.00147642	2.01757	0.483443	4.17334	Resistant		dasatinib	IC50	HIPK1	55.5777	0.0114534	0.117816	-0.993048	1.11086	Resistant
			dasatinib	LN_EC50	NBPF20	4.00792	0.00902738	1.91104	0.948911	2.01393	Resistant		dasatinib	IC50	OAS1	-3.10054	0.0319015	-1.22401	1.40928	-2.63329	Sensitive
			dasatinib	LN_EC50	PM20D1	2.62463	0.037955	0.07101	0.00358882	19.7864	Resistant		dasatinib	IC50	DTWD2	2.36346	0.0499425	0.483745	-0.669244	1.15299	Resistant
			dasatinib	LN_EC50	FCMR	2.30756	0.0464235	2.92556	1.19385	2.45052	Resistant		dasatinib	IC50	TAP1	-2.96599	0.0110571	-0.311128	0.831324	-1.14245	Sensitive
			dasatinib	LN_EC50	KCNF1	2.38873	0.0411658	1.37663	0.306146	4.49664	Resistant		dasatinib	IC50	EFNA1	3.20423	0.0491725	0.968666	-0.884636	1.8533	Resistant
			dasatinib	LN_EC50	SPATA18	2.63575	0.0293841	0.943194	0.212013	4.44876	Resistant		dasatinib	IC50	E9PL57	3.61212	0.00347045	0.489658	-0.598697	1.08835	Resistant
			dasatinib	LN_EC50	TMEM169	3.55475	0.0079157	0.762884	0.220078	3.46642	Resistant		dasatinib	IC50	UBA5	4.11409	0.00189589	0.187448	-0.873262	1.06071	Resistant
			dasatinib	LN_EC50	CLRN1	2.45516	0.0494434	0.051689	0	Inf	Resistant		dasatinib	IC50	RN128	-3.27618	0.0157062	-1.06939	0.931201	-2.00059	Sensitive
			dasatinib	LN_EC50	TGM4	-3.13773	0.0302094	0.0558093	0.193726	0.288084	Sensitive		dasatinib	IC50	TRPC6	-5.66693	0.0297561	-0.347561	2.67845	-3.02601	Sensitive
			dasatinib	LN_EC50	GRIK3	2.75268	0.0331696	1.29574	0.0107665	120.349	Resistant		dasatinib	IC50	FHAD1	-13.5774	0.000864179	-1.17273	2.49149	-3.66422	Sensitive
			dasatinib	LN_EC50	NPY1R	5.67388	0.00114956	3.98387	0.152202	26.1748	Resistant		dasatinib	IC50	RWDD4	3.61475	0.00283001	0.597421	-0.573728	1.17115	Resistant
			dasatinib	LN_EC50	NPY5R	3.22261	0.0180592	0.609622	0.00358882	169.867	Resistant		dasatinib	IC50	KCY	3.25672	0.00579556	0.300809	-0.78763	1.08844	Resistant
			dasatinib	LN_EC50	FAM170A	3.7073	0.0100016	0.0599971	0	Inf	Resistant		dasatinib	IC50	CYBR1	-2.646	0.0274897	-0.247836	1.78111	-2.02894	Sensitive
			dasatinib	LN_EC50	RAET1E	-3.14118	0.0122299	0.534211	1.18696	0.450067	Sensitive		dasatinib	IC50	LAP4A	-2.62561	0.0377782	0.3022	1.50778	-1.20558	Sensitive
			dasatinib	LN_EC50	BMPER	2.40222	0.0399049	0.301829	0.128979	2.34014	Resistant		dasatinib	IC50	HMGA2	-3.25373	0.00598169	-1.93239	0.741868	-2.67426	Sensitive
			dasatinib	LN_EC50	DLC1	2.54136	0.0324674	2.95833	1.34843	2.1939	Resistant		dasatinib	IC50	UN93B	-3.35587	0.0129237	0.180565	1.68019	-1.49963	Sensitive
			dasatinib	LN_EC50	C8orf48	2.70128	0.0300198	1.31943	0.354479	3.72218	Resistant		dasatinib	IC50	GLYG	3.23205	0.00649169	0.492413	-0.736142	1.22856	Resistant
			dasatinib	LN_EC50	NLGN4Y	2.67039	0.0330635	0.0422358	0.00358882	11.7687	Resistant		dasatinib	IC50	JDP2	-3.43795	0.0217768	-0.655366	1.28489	-1.94026	Sensitive
			dasatinib	LN_EC50	PHYHIPL	2.71195	0.0288775	1.12076	0.124946	8.96995	Resistant		dasatinib	IC50	AAMDC	2.77109	0.0175227	0.749394	-0.267323	1.01672	Resistant
			dasatinib	LN_EC50	AMER2	2.82843	0.0300197	0.0163252	0	Inf	Resistant		dasatinib	IC50	GULP1	-2.38278	0.0437687	-0.195589	0.903768	-1.09936	Sensitive
			dasatinib	LN_EC50	ASPG	2.51272	0.0354398	0.390284	0.0810189	4.8172	Resistant		dasatinib	IC50	CLRN3	13.8454	0.00517612	-0.990021	-3.80217	2.81215	Resistant
			dasatinib	LN_EC50	CYB5R2	-2.85148	0.0374179	1.04602	3.34876	0.312361	Sensitive		dasatinib	IC50	LEG9C	-4.15554	0.00321303	-1.19866	1.59512	-2.79378	Sensitive
			dasatinib	LN_EC50	RIC3	2.77118	0.0307095	1.713	0.121794	14.0647	Resistant		dasatinib	IC50	LEG9	-6.14078	0.00135458	-1.68161	0.910833	-2.59244	Sensitive
			dasatinib	LN_EC50	LMO1	3.58514	0.00593255	1.02221	0.197276	5.18163	Resistant		dasatinib	IC50	ANT3	-2.52162	0.0245012	-0.413034	0.631216	-1.04425	Sensitive
			dasatinib	LN_EC50	PRTG	3.35406	0.00862721	1.65653	0.563335	2.94058	Resistant		dasatinib	IC50	DAZP2	5.04258	0.0371496	-0.198302	-2.22361	2.0253	Resistant
			dasatinib	LN_EC50	GNGT2	-3.91572	0.00915503	0.016246	0.0770657	0.210807	Sensitive		dasatinib	IC50	SPRR3	-3.55163	0.0380463	-0.826151	2.54007	-3.36623	Sensitive
			dasatinib	LN_EC50	GPRC5B	-2.65652	0.0277296	1.50134	3.20026	0.469131	Sensitive		dasatinib	IC50	UBFD1	3.17201	0.00683424	0.15698	-0.99315	1.15013	Resistant
			dasatinib	LN_EC50	TUBA1A	3.5079	0.0244728	7.40465	3.19853	2.31502	Resistant		dasatinib	IC50	GTSF1	-5.08949	0.00278366	-1.19164	2.64214	-3.83378	Sensitive
			dasatinib	LN_EC50	RCOR2	2.74074	0.0419502	2.15761	1.04729	2.06019	Resistant		dasatinib	IC50	PAQR4	-17.4173	0.0365109	0.375298	2.33993	-1.96464	Sensitive
			dasatinib	LN_EC50	CD300C	3.21341	0.010635	0.0680012	0.0106611	6.37845	Resistant		dasatinib	IC50	NR2CA	4.62174	0.000525062	0.617727	-0.722212	1.33994	Resistant
			dasatinib	LN_EC50	NAALADL1	-2.36325	0.0474916	0.190174	0.404095	0.470616	Sensitive		dasatinib	IC50	S35A2	3.06134	0.0276926	0.639501	-0.417169	1.05667	Resistant
			dasatinib	LN_EC50	OR2B2	2.78727	0.0212664	0.0834163	0.0212882	3.91844	Resistant		dasatinib	IC50	DESI1	4.21564	0.00246189	0.0315802	-1.09309	1.12467	Resistant
			dasatinib	LN_EC50	KIF5C	3.39271	0.00878677	2.48667	0.665391	3.73715	Resistant		dasatinib	IC50	GI24	-4.1043	0.00390679	-1.26517	2.26602	-3.53118	Sensitive
			dasatinib	LN_EC50	SPRY3	2.8208	0.0204158	0.987731	0.396443	2.49148	Resistant		dasatinib	IC50	ICAM2	-3.77695	0.00663794	-1.03016	1.34274	-2.3729	Sensitive
			dasatinib	LN_EC50	NTSR2	2.77565	0.0321812	0.0784978	0	Inf	Resistant		dasatinib	IC50	QPCT	-5.11258	0.00408856	-1.20799	-0.016134	-1.19186	Sensitive
			dasatinib	LN_EC50	HTRA4	3.60463	0.0100764	0.144113	0.0107311	13.4294	Resistant		dasatinib	IC50	DYLT3	2.36117	0.0332984	0.700964	-0.730591	1.43155	Resistant
			dasatinib	LN_EC50	SPDYE5	4.67606	0.00124888	0.719861	0.281553	2.55675	Resistant		dasatinib	IC50	ATOX1	4.23475	0.00102172	0.836056	-0.808842	1.6449	Resistant
			dasatinib	LN_EC50	NPAS2	-3.9553	0.00411551	1.89078	3.80884	0.49642	Sensitive		dasatinib	IC50	CV039	3.13196	0.0315786	0.998221	-0.167806	1.16603	Resistant
			dasatinib	LN_EC50	KRT83	3.58052	0.0108867	1.0129	0.194276	5.21375	Resistant		dasatinib	IC50	NRK1	5.10513	0.0145376	0.1147	-1.295	1.4097	Resistant
			dasatinib	LN_EC50	PLA2G1B	2.82011	0.0303498	0.074809	0	Inf	Resistant		dasatinib	IC50	MOC2A	3.38618	0.00491614	0.635385	-0.657691	1.29308	Resistant
			dasatinib	LN_EC50	PGK2	3.5618	0.00619413	0.0484621	0.00714229	6.78523	Resistant		dasatinib	IC50	ETUD1	2.92106	0.0117489	0.384443	-0.625492	1.00993	Resistant
			dasatinib	LN_EC50	FUT3	-3.09583	0.0199583	0.95696	3.65531	0.2618	Sensitive		dasatinib	IC50	ZN808	-5.059	0.0369221	-0.146666	2.23568	-2.38235	Sensitive
			dasatinib	LN_EC50	NLRP5	2.82843	0.0300197	0.00820302	0	Inf	Resistant		dasatinib	IC50	NCF2	-7.0927	0.00463369	-0.601822	0.493801	-1.09562	Sensitive
			dasatinib	LN_EC50	FGG	2.79386	0.0307604	0.245189	0.0600016	4.08637	Resistant		dasatinib	IC50	RN5A	2.50869	0.0329202	0.927753	-0.544618	1.47237	Resistant
			dasatinib	LN_EC50	GATM	-3.14881	0.0139123	1.62081	3.96876	0.408392	Sensitive		dasatinib	IC50	PICK1	2.36706	0.0356973	0.679961	-0.403553	1.08351	Resistant
			dasatinib	LN_EC50	CTSW	3.38836	0.00841346	0.300331	0.079562	3.77481	Resistant		dasatinib	IC50	AFAD	-2.54351	0.0324423	-0.598012	0.444817	-1.04283	Sensitive
			dasatinib	LN_EC50	HPSE2	-2.87772	0.0414162	0.0102538	0.0285345	0.359347	Sensitive		dasatinib	IC50	J3KN01	-2.87769	0.0179787	-0.865952	0.619079	-1.48503	Sensitive
			dasatinib	LN_EC50	SYT12	2.54115	0.0480478	5.36049	2.54683	2.10477	Resistant		dasatinib	IC50	PPID	3.98489	0.00164064	0.0985831	-0.92627	1.02485	Resistant
			dasatinib	LN_EC50	GPR148	2.82843	0.0300197	0.0163252	0	Inf	Resistant		dasatinib	IC50	TNIK	-3.94704	0.0294332	-1.43153	-0.226423	-1.20511	Sensitive
			dasatinib	LN_EC50	TAS1R1	-2.63419	0.0333353	0.0499958	0.120581	0.414623	Sensitive		dasatinib	IC50	ZNF22	-2.55474	0.0384987	-0.88579	0.274963	-1.16075	Sensitive
			dasatinib	LN_EC50	MARCHF10	3.27786	0.0165991	0.321008	0.00714229	44.9447	Resistant		dasatinib	IC50	KLF5	-2.94249	0.0164168	-1.07921	1.49307	-2.57228	Sensitive
			dasatinib	LN_EC50	C9orf131	3.25656	0.0139935	0.211099	0.0865656	2.4386	Resistant		dasatinib	IC50	G3V3L7	-5.37065	0.00582882	-0.189698	0.944975	-1.13467	Sensitive
			dasatinib	LN_EC50	CNTNAP2	2.72968	0.0307486	0.820746	0.192292	4.26822	Resistant		dasatinib	IC50	Z324A	-13.9534	0.0455468	0.234002	2.14338	-1.90938	Sensitive
			dasatinib	LN_EC50	IGDCC3	2.49667	0.0397672	1.38989	0.247282	5.62068	Resistant		dasatinib	IC50	NOE2	13.3243	0.0476896	0.00474879	-1.30155	1.3063	Resistant
			dasatinib	LN_EC50	AMY1B	2.59242	0.0393436	0.0634111	0.00358882	17.6691	Resistant		dasatinib	IC50	CRCM1	-2.32051	0.0411168	-0.176532	0.832966	-1.0095	Sensitive
			dasatinib	LN_EC50	PPM1E	2.77818	0.0215016	1.04893	0.252366	4.15637	Resistant		dasatinib	IC50	PAR2	-22.255	0.0285864	-0.637335	3.40924	-4.04657	Sensitive
			dasatinib	LN_EC50	NPPA	-3.52754	0.0086691	0.154207	0.421713	0.365667	Sensitive		dasatinib	IC50	CKS2	4.81271	0.000709378	0.829443	-0.175675	1.00512	Resistant
			dasatinib	LN_EC50	LRRC25	-3.15442	0.0120335	0.0101936	0.0320879	0.317676	Sensitive		dasatinib	IC50	PEMT	-21.4115	0.00217413	-0.42488	0.984015	-1.40889	Sensitive
			dasatinib	LN_EC50	EIF4E1B	2.42437	0.0492295	0.414301	0.0454188	9.12181	Resistant		dasatinib	LN_EC50	PDLI3	2.44108	0.0224083	0.741885	-0.366297	1.10818	Resistant
			dasatinib	LN_EC50	PRIMA1	2.90834	0.0230838	1.04473	0.185443	5.63368	Resistant		dasatinib	LN_EC50	POSTN	2.64961	0.021156	0.49523	-0.748659	1.24389	Resistant
			dasatinib	LN_EC50	DOK7	3.37297	0.00828063	3.54068	1.3878	2.55128	Resistant		dasatinib	LN_EC50	MYH3	-2.22726	0.038238	-0.452592	0.646977	-1.09957	Sensitive
			dasatinib	LN_EC50	LRRN1	2.38746	0.0456776	1.89599	0.42062	4.5076	Resistant		dasatinib	LN_EC50	NFIP2	-2.302	0.0375322	-0.404492	0.793292	-1.19778	Sensitive
			dasatinib	LN_EC50	DIRAS1	2.68112	0.0302365	2.78272	0.996666	2.79202	Resistant		dasatinib	LN_EC50	RBY1B	-2.60444	0.0246941	-1.16425	0.401463	-1.56572	Sensitive
			dasatinib	LN_EC50	SOX11	2.64836	0.0369157	0.645728	0.0346709	18.6245	Resistant		dasatinib	LN_EC50	TEN4	2.2901	0.0414048	0.18785	-1.2105	1.39835	Resistant
			dasatinib	LN_EC50	KCNA2	2.82843	0.0300197	0.00820302	0	Inf	Resistant		dasatinib	LN_EC50	CN159	-4.57384	0.000141158	-0.722828	1.20241	-1.92524	Sensitive
			dasatinib	LN_EC50	CALML5	-3.0947	0.0128627	2.69658	5.48818	0.491344	Sensitive		dasatinib	LN_EC50	TNAP2	-3.20016	0.00430821	0.038108	1.18307	-1.14496	Sensitive
			dasatinib	LN_EC50	CCDC185	3.0597	0.0210339	0.201363	0.0178387	11.288	Resistant		dasatinib	LN_EC50	K1468	2.35061	0.0371249	0.804564	-0.204252	1.00882	Resistant
			dasatinib	LN_EC50	DNAJC22	3.22516	0.0284651	3.94084	1.82665	2.15741	Resistant		dasatinib	LN_EC50	FAS	3.00733	0.00629313	0.832816	-0.400811	1.23363	Resistant
			dasatinib	LN_EC50	OPLAH	-4.2763	0.00445156	2.08084	4.4245	0.470299	Sensitive		dasatinib	LN_EC50	FCHO1	2.58958	0.0481564	0.807592	-1.75283	2.56042	Resistant
			dasatinib	LN_EC50	EGR3	2.73149	0.0292777	2.37336	0.39572	5.99757	Resistant		dasatinib	LN_EC50	VPP4	2.82752	0.0476047	3.66579	0.213965	3.45182	Resistant
			dasatinib	LN_EC50	SLITRK4	2.6769	0.0256585	1.16686	0.254669	4.58187	Resistant		dasatinib	LN_EC50	GFAP	16.7634	0.0035397	0.843717	-0.800437	1.64415	Resistant
			dasatinib	LN_EC50	RNF151	2.47836	0.0351092	0.233779	0.0618841	3.77769	Resistant		dasatinib	LN_EC50	TAU	2.83245	0.0118748	1.14954	-0.719211	1.86875	Resistant
			dasatinib	LN_EC50	ATOH7	2.53515	0.0325756	0.358714	0.108413	3.30877	Resistant		dasatinib	LN_EC50	DLX1	15.8404	0.0401363	3.9478	0.129623	3.81818	Resistant
			dasatinib	LN_EC50	C1orf194	2.49973	0.044494	0.391829	0.140353	2.79174	Resistant		dasatinib	LN_EC50	FLNB	-2.49184	0.0225386	-0.494139	2.07637	-2.57051	Sensitive
			dasatinib	LN_EC50	B3GNT3	-2.42845	0.049847	1.73853	3.77414	0.460643	Sensitive		dasatinib	LN_EC50	LRP1B	-2.46627	0.0307829	-0.770249	0.307688	-1.07794	Sensitive
			dasatinib	LN_EC50	GPBAR1	4.30281	0.0103688	0.272845	0.123289	2.21305	Resistant		dasatinib	LN_EC50	PKP2	-2.57913	0.0191275	-0.275842	1.07252	-1.34836	Sensitive
			dasatinib	LN_EC50	FAM71E2	2.82843	0.0300197	0.0163252	0	Inf	Resistant		dasatinib	LN_EC50	NHRF1	2.33858	0.0280833	1.36669	0.133961	1.23273	Resistant
			dasatinib	LN_EC50	TMEM64	3.78559	0.0138918	6.09537	2.17961	2.79654	Resistant		dasatinib	LN_EC50	CTR2	3.30235	0.00374615	0.256893	-1.12756	1.38446	Resistant
			dasatinib	LN_EC50	OR6B2	2.70771	0.035213	0.0203467	0	Inf	Resistant		dasatinib	LN_EC50	PGM2L	2.57199	0.0187056	0.612212	-0.605282	1.21749	Resistant
			dasatinib	LN_EC50	PLCB1	4.12765	0.00265104	3.15143	0.768508	4.10071	Resistant		dasatinib	LN_EC50	IFIT3	-2.15999	0.0440922	-0.245628	1.0869	-1.33253	Sensitive
			dasatinib	LN_EC50	SLC25A21	3.52066	0.0116137	1.67489	0.808506	2.07159	Resistant		dasatinib	LN_EC50	TTYH3	-2.54405	0.019683	-0.360119	0.739652	-1.09977	Sensitive
			dasatinib	LN_EC50	PCP4	2.78868	0.0314358	2.6939	0.121724	22.1312	Resistant		dasatinib	LN_EC50	RILP	-3.81773	0.0113744	-0.0663606	1.5775	-1.64386	Sensitive
			dasatinib	LN_EC50	BEGAIN	2.90296	0.0219389	1.5896	0.56273	2.8248	Resistant		dasatinib	LN_EC50	1A25	-2.94423	0.00883068	-0.771236	1.51882	-2.29005	Sensitive
			dasatinib	LN_EC50	OPCML	2.82843	0.0300197	0.00820302	0	Inf	Resistant		dasatinib	LN_EC50	1C02	-2.14843	0.0424502	-0.317667	1.76657	-2.08424	Sensitive
			dasatinib	LN_EC50	CNGA2	2.52392	0.045048	0.0122641	0	Inf	Resistant		dasatinib	LN_EC50	EVL	2.39026	0.0254017	0.872024	-0.161324	1.03335	Resistant
			dasatinib	LN_EC50	H2AC21	2.94351	0.0179146	1.07004	0.265298	4.03333	Resistant		dasatinib	LN_EC50	SYNP2	2.57607	0.0322024	1.02217	-0.782729	1.8049	Resistant
			dasatinib	LN_EC50	EFNA5	-2.32689	0.0458994	1.19687	2.6947	0.444157	Sensitive		dasatinib	LN_EC50	H3BNW5	-2.43305	0.0397042	0.496861	1.7079	-1.21104	Sensitive
			dasatinib	LN_EC50	PABPC1L2B	2.62588	0.0392755	0.156132	0	Inf	Resistant		dasatinib	LN_EC50	CO3	-2.94473	0.00843224	-0.243385	1.07012	-1.31351	Sensitive
			dasatinib	LN_EC50	CCR10	2.41367	0.0394632	0.581806	0.235996	2.46533	Resistant		dasatinib	LN_EC50	H0YDG6	-2.27456	0.0405407	-1.21841	0.276055	-1.49446	Sensitive
			dasatinib	LN_EC50	C5orf47	3.30657	0.00914085	0.0305205	0.00717764	4.25216	Resistant		dasatinib	LN_EC50	ABLM2	-2.72855	0.0138437	-0.544891	0.568553	-1.11344	Sensitive
			dasatinib	LN_EC50	MYADML2	2.58125	0.0343747	0.379965	0.149566	2.54045	Resistant		dasatinib	LN_EC50	ARK73	2.61224	0.0202265	0.463556	-0.914303	1.37786	Resistant
			dasatinib	LN_EC50	RGPD2	3.63739	0.0054926	1.75517	0.35785	4.90475	Resistant		dasatinib	LN_EC50	STING	-2.56137	0.0220179	-0.840581	0.553095	-1.39368	Sensitive
			dasatinib	LN_EC50	GPRIN3	2.5587	0.0408413	0.949234	0.0769903	12.3293	Resistant		dasatinib	LN_EC50	GFRA1	4.5063	0.00137968	2.81658	-0.371122	3.18771	Resistant
			dasatinib	LN_EC50	PRKG1	3.09172	0.0147008	2.51773	0.740286	3.40102	Resistant		dasatinib	LN_EC50	GRAM3	-3.20043	0.00737373	0.458922	1.6861	-1.22718	Sensitive
			dasatinib	LN_EC50	SHC4	2.5632	0.0379997	0.885349	0.240139	3.68682	Resistant		dasatinib	LN_EC50	IFIT2	-2.28001	0.0328331	-0.403138	0.955411	-1.35855	Sensitive
			dasatinib	LN_EC50	DLEU7	4.43972	0.00224467	0.0797887	0.0143199	5.57186	Resistant		dasatinib	LN_EC50	IFIT1	-2.28568	0.032436	-0.300694	1.1422	-1.44289	Sensitive
			dasatinib	LN_EC50	TAL2	2.77962	0.0229398	0.550049	0.169222	3.25046	Resistant		dasatinib	LN_EC50	MCP	-2.42692	0.0305869	-0.613935	0.403736	-1.01767	Sensitive
			dasatinib	LN_EC50	FSCN2	2.71058	0.0480322	1.49895	0.725911	2.06492	Resistant		dasatinib	LN_EC50	PTK7	-4.24239	0.000400746	-0.207433	1.18398	-1.39141	Sensitive
			dasatinib	LN_EC50	MAPT	2.89844	0.0245385	3.35707	0.498712	6.7315	Resistant		dasatinib	LN_EC50	BCAM	-2.15313	0.0453785	0.506498	1.57869	-1.07219	Sensitive
			dasatinib	LN_EC50	KANK3	-3.12276	0.0303312	0.585371	1.72259	0.33982	Sensitive		dasatinib	LN_EC50	E41L1	-2.50973	0.0243766	-0.19219	0.865375	-1.05756	Sensitive
			dasatinib	LN_EC50	ACTL7A	2.55998	0.0412677	0.032551	0.0107311	3.03333	Resistant		dasatinib	LN_EC50	H7C2K6	-2.90842	0.0343178	-0.759791	1.61406	-2.37385	Sensitive
			dasatinib	LN_EC50	MAGI2	2.57757	0.0400876	0.863645	0.141983	6.08274	Resistant		dasatinib	LN_EC50	CO1A2	2.69197	0.0128044	0.611656	-0.446021	1.05768	Resistant
			dasatinib	LN_EC50	H1.6	4.87984	0.0022238	0.359377	0.0141459	25.4051	Resistant		dasatinib	LN_EC50	TRPS1	2.3085	0.0341156	2.1526	1.09943	1.05317	Resistant
			dasatinib	LN_EC50	KCNJ11	2.33236	0.0468874	1.64759	0.815315	2.0208	Resistant		dasatinib	LN_EC50	AF1L2	-2.60213	0.0217747	-0.853303	0.565492	-1.4188	Sensitive
			dasatinib	LN_EC50	H2AP	2.78167	0.0238435	0.216532	0.0277578	7.80076	Resistant		dasatinib	LN_EC50	ITA6	-2.72346	0.0141583	-0.723153	0.630776	-1.35393	Sensitive
			dasatinib	LN_EC50	RGPD1	2.67242	0.035954	1.34802	0.147745	9.12394	Resistant		dasatinib	LN_EC50	C1QR1	4.32733	0.00507903	-0.234635	-1.50858	1.27395	Resistant
			dasatinib	LN_EC50	DNAJB13	2.59791	0.0291162	0.671323	0.296511	2.26407	Resistant		dasatinib	LN_EC50	IF2B3	-3.36463	0.00257756	-1.16457	0.302553	-1.46712	Sensitive
			dasatinib	LN_EC50	LDLRAD2	-4.00365	0.00479244	0.452837	1.29346	0.350096	Sensitive		dasatinib	LN_EC50	IF2B2	-2.73705	0.0118389	-1.18907	-0.0941481	-1.09492	Sensitive
			dasatinib	LN_EC50	NRN1L	3.31252	0.0128591	0.593521	0.268213	2.21288	Resistant		dasatinib	LN_EC50	CASP5	-2.65045	0.0176714	-0.805174	0.291986	-1.09716	Sensitive
			dasatinib	LN_EC50	PEAK3	3.03392	0.0149785	0.0817995	0.0390915	2.09251	Resistant		dasatinib	LN_EC50	ACADS	-2.7517	0.0115106	-0.627232	0.468371	-1.0956	Sensitive
			dasatinib	LN_EC50	CERKL	3.02587	0.0219887	0.252752	0.0390229	6.47702	Resistant		dasatinib	LN_EC50	ZC21A	2.94135	0.00713156	0.470071	-0.613774	1.08385	Resistant
			dasatinib	LN_EC50	ADRB3	2.82843	0.0300197	0.00820302	0	Inf	Resistant		dasatinib	LN_EC50	5NTD	-2.5927	0.0166312	-0.583015	0.588384	-1.1714	Sensitive
			dasatinib	LN_EC50	FAM78B	3.06616	0.0134407	0.187765	0.045402	4.13562	Resistant		dasatinib	LN_EC50	UD13	-2.62601	0.0208227	-1.34166	-0.0835896	-1.25807	Sensitive
			dasatinib	LN_EC50	ASTL	2.50581	0.0484334	0.50206	0.165932	3.02571	Resistant		dasatinib	LN_EC50	PTGES	-3.04993	0.00761165	0.182334	2.26044	-2.07811	Sensitive
			dasatinib	LN_EC50	INSYN2A	3.17457	0.0157801	0.379799	0.0867822	4.37645	Resistant		dasatinib	LN_EC50	I3L3C6	-2.87879	0.0211276	-0.0215881	1.16641	-1.188	Sensitive
			dasatinib	LN_EC50	AKR1C3	-3.03975	0.0193733	2.30572	5.31532	0.433788	Sensitive		dasatinib	LN_EC50	LANC1	3.92702	0.00108155	0.368204	-0.638273	1.00648	Resistant
			dasatinib	LN_EC50	THEM5	2.50405	0.0435038	0.631898	0.105971	5.96291	Resistant		dasatinib	LN_EC50	SETD7	3.33448	0.00549957	0.631209	-0.41551	1.04672	Resistant
			dasatinib	LN_EC50	CCDC196	2.68528	0.0293351	0.152054	0.0247396	6.14615	Resistant		dasatinib	LN_EC50	LYSM1	3.97111	0.00124869	0.932978	-0.549484	1.48246	Resistant
			dasatinib	LN_EC50	POTEF	2.37305	0.0435688	2.31384	0.573746	4.03286	Resistant		dasatinib	LN_EC50	IKKB	3.22604	0.00362718	0.680526	-0.361968	1.04249	Resistant
			dasatinib	LN_EC50	DAPK1	-3.10575	0.0245143	1.10877	3.89528	0.284645	Sensitive		dasatinib	LN_EC50	CLIC5	-2.60689	0.0201386	-1.28237	1.95403	-3.2364	Sensitive
			dasatinib	LN_EC50	TOMM20L	2.85671	0.0246975	0.258263	0.0939732	2.74826	Resistant		dasatinib	LN_EC50	SRBS2	-2.52055	0.0210947	-0.510967	0.699848	-1.21082	Sensitive
			dasatinib	LN_EC50	H2AC7	2.28299	0.0491166	1.61842	0.602022	2.68831	Resistant		dasatinib	LN_EC50	STC2	2.34567	0.0295873	1.24854	-0.41814	1.66668	Resistant
			dasatinib	LN_EC50	H2BU1	2.34465	0.0449341	2.59059	1.25696	2.06099	Resistant		dasatinib	LN_EC50	SUCHY	-2.97213	0.0389426	0.0445879	2.1882	-2.14361	Sensitive
			dasatinib	LN_EC50	ADAM32	4.52068	0.00976992	1.42328	0.343468	4.14386	Resistant		dasatinib	LN_EC50	AEBP1	-52.1777	8.07514e-07	-0.205611	1.90373	-2.10934	Sensitive
			dasatinib	LN_EC50	H3C12	2.74358	0.02665	1.49395	0.515525	2.89792	Resistant		dasatinib	LN_EC50	PLBL1	-2.73556	0.0149725	-0.157169	1.3501	-1.50727	Sensitive
			dasatinib	LN_EC50	H3C4	2.41845	0.0388728	1.859	0.834187	2.22851	Resistant		dasatinib	LN_EC50	DEN2A	2.49882	0.0382006	1.78716	-0.245724	2.03288	Resistant
			dasatinib	LN_EC50	KCNMB2	2.49188	0.0355603	0.151936	0.0244027	6.2262	Resistant		dasatinib	LN_EC50	TSN6	-2.65668	0.0151989	-0.338724	1.01182	-1.35054	Sensitive
			dasatinib	LN_EC50	KLHL14	5.56568	0.00262098	0.0265386	0.00358882	7.39479	Resistant		dasatinib	LN_EC50	RN213	3.0528	0.0110082	0.330348	-0.764373	1.09472	Resistant
			dasatinib	LN_EC50	ELOVL2	2.68066	0.0309541	3.18852	0.634422	5.02587	Resistant		dasatinib	LN_EC50	CXAR	-3.39651	0.00238098	-0.342231	0.915994	-1.25823	Sensitive
			dasatinib	LN_EC50	DCAF12L2	3.00709	0.0237303	0.681069	0.00714229	95.3573	Resistant		dasatinib	LN_EC50	DHE4	2.35402	0.0466879	1.04641	-1.48367	2.53008	Resistant
			dasatinib	LN_EC50	B3GNT6	4.26423	0.00496751	0.131911	0.00358882	36.756	Resistant		dasatinib	LN_EC50	ACBP	2.32116	0.0292922	0.457293	-0.606529	1.06382	Resistant
			dasatinib	LN_EC50	HLA.DRB5	2.63606	0.0288026	2.43353	0.961844	2.53007	Resistant		dasatinib	LN_EC50	PHP14	2.2868	0.0327386	0.598399	-0.407154	1.00555	Resistant
			dasatinib	LN_EC50	KCNRG	2.50787	0.0376598	0.748764	0.302781	2.47296	Resistant		dasatinib	LN_EC50	TWSG1	-2.42179	0.0233974	-0.131897	1.00355	-1.13544	Sensitive
			dasatinib	LN_EC50	LRRTM3	2.82843	0.0300197	0.00820302	0	Inf	Resistant		dasatinib	LN_EC50	THMS2	-3.35625	0.00680398	-1.15275	-0.0648543	-1.0879	Sensitive
			dasatinib	LN_EC50	KPRP	2.82843	0.0300197	0.00820302	0	Inf	Resistant		dasatinib	LN_EC50	S10A4	-2.71117	0.0156695	-0.495668	0.707377	-1.20304	Sensitive
			dasatinib	LN_EC50	H3C14	4.21172	0.00561246	2.20269	0	Inf	Resistant		dasatinib	LN_EC50	MUC16	-2.41777	0.0354627	-0.249569	1.74576	-1.99533	Sensitive
			dasatinib	LN_EC50	H2BC18	2.41383	0.0390131	2.77922	1.10181	2.52241	Resistant		dasatinib	LN_EC50	B4E1Z4	-3.27961	0.00730912	0.355518	2.1533	-1.79778	Sensitive
			dasatinib	LN_EC50	H3C15	2.39346	0.0431183	2.67949	1.26024	2.12617	Resistant		dasatinib	LN_EC50	GPD1L	2.37529	0.0278334	0.7917	-0.212084	1.00378	Resistant
			dasatinib	LN_EC50	DPPA5	2.76548	0.032617	0.0283508	0	Inf	Resistant		dasatinib	LN_EC50	RABP1	2.64056	0.0161104	2.04946	0.0453194	2.00414	Resistant
			dasatinib	LN_EC50	CXorf65	2.82843	0.0300197	0.0860341	0	Inf	Resistant		dasatinib	LN_EC50	PLCB4	2.34638	0.0292191	0.796616	-0.339576	1.13619	Resistant
			dasatinib	LN_EC50	PJVK	-2.56278	0.0306017	0.988097	2.05627	0.480529	Sensitive		dasatinib	LN_EC50	GPX7	-2.40931	0.0342953	-0.629466	1.56288	-2.19234	Sensitive
			dasatinib	LN_EC50	ZSCAN5C	2.44589	0.044937	0.0362825	0.00358882	10.1099	Resistant		dasatinib	LN_EC50	STOM	2.42748	0.0231575	0.538723	-0.492057	1.03078	Resistant
			dasatinib	LN_EC50	KRTAP5.10	3.01923	0.0153653	0.202055	0.0349001	5.78952	Resistant		dasatinib	LN_EC50	ID1	-2.58891	0.023214	-0.767092	0.3004	-1.06749	Sensitive
			dasatinib	LN_EC50	LRRC10B	2.71565	0.0241581	1.71443	0.474933	3.60983	Resistant		dasatinib	LN_EC50	ROR1	-2.17868	0.0488339	-0.894505	0.457461	-1.35197	Sensitive
			dasatinib	LN_EC50	PCDHA7	3.65836	0.00898744	0.877689	0.0884744	9.92026	Resistant		dasatinib	LN_EC50	HOME2	2.43149	0.0305434	1.01134	0.00725385	1.00408	Resistant
			dasatinib	LN_EC50	PCDHA5	3.13675	0.0189153	0.548568	0.0454925	12.0584	Resistant		dasatinib	LN_EC50	CENPV	-2.15258	0.0450626	-0.64488	0.423957	-1.06884	Sensitive
			dasatinib	LN_EC50	PCDHA2	4.01812	0.00466892	0.805744	0.0907319	8.88049	Resistant		dasatinib	LN_EC50	GLU2B	-2.4769	0.0224126	-0.5567	0.51098	-1.06768	Sensitive
			dasatinib	LN_EC50	PABPN1L	2.65546	0.0367433	0.328081	0.0141459	23.1927	Resistant		dasatinib	LN_EC50	ISOC1	2.89234	0.00896211	0.932181	-0.222708	1.15489	Resistant
			dasatinib	LN_EC50	ATP6AP1L	-2.42959	0.0410549	0.706936	1.42418	0.49638	Sensitive		dasatinib	LN_EC50	LOXL1	15.4177	0.0142421	0.266846	-0.787814	1.05466	Resistant
			dasatinib	LN_EC50	KRTAP5.1	1.22008	0.262471	0.0392867	0.00714229	5.50058	Resistant		dasatinib	LN_EC50	CRIP2	2.87745	0.00831752	1.46441	-0.0945839	1.559	Resistant
			dasatinib	LN_EC50	HBA1	2.40867	0.0422593	2.77215	0.786175	3.52612	Resistant		dasatinib	LN_EC50	MUM1	4.33087	0.00508235	0.532009	-0.469384	1.00139	Resistant
			dasatinib	LN_EC50	MAGEB1	1.54919	0.172308	0.0240184	0	Inf	Resistant		dasatinib	LN_EC50	ICAM1	-2.38332	0.0263894	-0.64703	0.62409	-1.27112	Sensitive
			dasatinib	LN_EC50	ZNF705D	2.6423	0.0294117	0.026419	0.00358882	7.36145	Resistant		dasatinib	LN_EC50	SEM4D	-2.68379	0.0229281	-0.261397	0.772837	-1.03423	Sensitive
			dasatinib	LN_EC50	HEPN1	2.52392	0.045048	0.0122641	0	Inf	Resistant		dasatinib	LN_EC50	APOH	-2.2272	0.0407456	-0.691893	0.31153	-1.00342	Sensitive
			dasatinib	LN_EC50	XKR9	3.05312	0.0224741	1.70358	0.668575	2.54808	Resistant		dasatinib	LN_EC50	PDE1C	3.62484	0.00472618	1.78107	-0.602503	2.38357	Resistant
			dasatinib	LN_EC50	TMEM233	2.82843	0.0300197	0.00820302	0	Inf	Resistant		dasatinib	LN_EC50	DEST	3.05514	0.00724386	0.828394	-0.197251	1.02565	Resistant
			dasatinib	LN_EC50	PVALEF	3.23163	0.0127168	0.279024	0.0663251	4.2069	Resistant		dasatinib	LN_EC50	K0753	-3.31946	0.038032	-0.364987	0.768616	-1.1336	Sensitive
			dasatinib	LN_EC50	C2CD4D	3.37232	0.00975574	0.70785	0.265998	2.66112	Resistant		dasatinib	LN_EC50	GSTT1	3.04173	0.0105449	1.25714	-1.25653	2.51367	Resistant
			dasatinib	LN_EC50	ORM2	2.76548	0.032617	0.0283508	0	Inf	Resistant		dasatinib	LN_EC50	ANXA8	-2.43226	0.0249036	-0.446611	0.938992	-1.3856	Sensitive
			dasatinib	LN_EC50	CLDN34	2.82843	0.0300197	0.0323334	0	Inf	Resistant		dasatinib	LN_EC50	CADM2	33.2727	0.0191276	0.163009	-1.07956	1.24257	Resistant
			dasatinib	LN_EC50	TAS2R39	2.52725	0.0448459	0.0243293	0	Inf	Resistant		dasatinib	LN_EC50	ANR39	2.73794	0.035264	0.804055	-0.812791	1.61685	Resistant
			dasatinib	LN_EC50	PCDHA13	2.58637	0.0348104	1.01689	0.196701	5.1697	Resistant		dasatinib	LN_EC50	KLK5	-6.54449	0.000624669	0.770352	5.90747	-5.13711	Sensitive
			dasatinib	LN_EC50	KRTAP10.5	2.82843	0.0300197	0.0163252	0	Inf	Resistant		dasatinib	LN_EC50	F198B	-2.82549	0.0480183	-1.59759	-0.324963	-1.27262	Sensitive
			dasatinib	LN_EC50	OR5V1	2.52392	0.045048	0.0122641	0	Inf	Resistant		dasatinib	LN_EC50	MDM2	2.58855	0.0260493	0.428256	-1.05471	1.48296	Resistant
			dasatinib	LN_EC50	KRTAP5.7	3.42721	0.00761688	0.172427	0.0422022	4.08573	Resistant		dasatinib	LN_EC50	EAA1	-2.21036	0.0397734	-0.604654	0.673396	-1.27805	Sensitive
			dasatinib	LN_EC50	USP51	4.275	0.00207183	0.893101	0.307067	2.90849	Resistant		dasatinib	LN_EC50	EAA4	-12.9963	0.000202268	-0.986994	2.73479	-3.72178	Sensitive
			dasatinib	LN_EC50	PCDHA11	2.90557	0.018995	1.92133	0.584629	3.2864	Resistant		dasatinib	LN_EC50	FOLR1	-3.07097	0.0080279	-0.133469	2.58442	-2.71789	Sensitive
			dasatinib	LN_EC50	KRTAP5.9	3.3298	0.0103201	0.182483	0.0732614	2.49084	Resistant		dasatinib	LN_EC50	TRI58	38.0838	7.28521e-05	3.15608	-0.179232	3.33531	Resistant
			dasatinib	LN_EC50	PCDHA3	2.94999	0.0244493	0.691572	0.0660175	10.4756	Resistant		dasatinib	LN_EC50	G6PD	3.0113	0.00605778	0.649066	-0.584292	1.23336	Resistant
			dasatinib	LN_EC50	PPIAL4D	3.74909	0.00468548	0.0988988	0.0141459	6.99135	Resistant		dasatinib	LN_EC50	TLR3	-3.40515	0.00460668	-1.09308	1.1969	-2.28998	Sensitive
			dasatinib	LN_EC50	STH	2.50807	0.0460229	0.347461	0	Inf	Resistant		dasatinib	LN_EC50	BLVRB	2.79413	0.0100657	0.799984	-0.337412	1.1374	Resistant
			dasatinib	LN_EC50	TP53TG3B	2.68564	0.0362627	0.331157	0	Inf	Resistant		dasatinib	LN_EC50	CP2S1	-3.09898	0.00690028	-0.81129	0.408566	-1.21986	Sensitive
			dasatinib	LN_EC50	SPON1	-3.0242	0.0179247	0.151997	0.391422	0.38832	Sensitive		dasatinib	LN_EC50	POLI	23.9426	1.80481e-05	0.286355	-0.935093	1.22145	Resistant
			dasatinib	LN_EC50	COMMD3.BMI1	3.40333	0.00788278	0.355158	0.0535312	6.63459	Resistant		dasatinib	LN_EC50	HG2A	-2.9121	0.0103467	-1.02066	0.465678	-1.48634	Sensitive
			dasatinib	LN_EC50	CTAGE6	2.74829	0.0297422	0.044214	0.00358882	12.3199	Resistant		dasatinib	LN_EC50	BT3A3	-3.82483	0.00120648	-0.34324	0.873907	-1.21715	Sensitive
			dasatinib	LN_EC50	SMIM32	2.46422	0.0470871	0.182149	0.0724765	2.51321	Resistant		dasatinib	LN_EC50	LMCD1	3.00366	0.00741667	0.955402	-0.375853	1.33126	Resistant
			dasatinib	LN_EC50	FAM47E.STBD1	2.91047	0.0491567	0.861606	0.318927	2.70158	Resistant		dasatinib	LN_EC50	MCM9	-3.55575	0.0165681	-0.0319898	0.97903	-1.01102	Sensitive
			dasatinib	LN_EC50	FOXD4L6	2.80291	0.0310447	0.0441296	0	Inf	Resistant		dasatinib	LN_EC50	RIMB1	3.23337	0.0396343	0.980601	-0.183227	1.16383	Resistant
			dasatinib	LN_EC50	TPTE	1.91982	0.103292	0.0281199	0	Inf	Resistant		dasatinib	LN_EC50	CYLD	2.62843	0.0201796	0.538657	-0.501896	1.04055	Resistant
			dasatinib	LN_EC50	H4C6	2.49117	0.0470874	0.121253	0	Inf	Resistant		dasatinib	LN_EC50	FAM9C	-17.4292	0.00327573	0.123051	1.60528	-1.48222	Sensitive
			dasatinib	LN_EC50	H4C5	2.39362	0.0409172	2.71881	1.26374	2.1514	Resistant		dasatinib	LN_EC50	PANX2	-2.33828	0.0498603	-0.221335	1.44817	-1.6695	Sensitive
			dasatinib	LN_EC50	HNRNPCL3	2.5305	0.0446498	0.0362025	0	Inf	Resistant		dasatinib	LN_EC50	FUCO	-2.34584	0.0321647	-0.573493	0.427045	-1.00054	Sensitive
			dasatinib	LN_EC50	H4C4	2.32285	0.0489125	1.32801	0.587567	2.26018	Resistant		dasatinib	LN_EC50	KDEL2	-3.49649	0.00186628	-0.735675	0.364356	-1.10003	Sensitive
			dasatinib	LN_EC50	H2BC7	2.64044	0.027096	2.93438	1.21703	2.41109	Resistant		dasatinib	LN_EC50	CO1A1	2.94152	0.00932785	0.611547	-0.754999	1.36655	Resistant
			dasatinib	LN_EC50	H3C7	2.32392	0.0495819	1.68412	0.729136	2.30975	Resistant		dasatinib	LN_EC50	CADM3	8.44255	0.00348769	0.85485	-1.65324	2.50809	Resistant
			dasatinib	LN_EC50	SSTR3	2.99409	0.0154465	0.0244482	0.00358882	6.81232	Resistant		dasatinib	LN_EC50	GTR10	2.98412	0.0112412	1.5957	-0.0339343	1.62964	Resistant
			dasatinib	LN_EC50	H4C2	2.41429	0.0394734	0.257058	0.0888274	2.89391	Resistant		dasatinib	LN_EC50	ZN703	2.79971	0.0100403	0.764672	-0.414197	1.17887	Resistant
			dasatinib	LN_EC50	OR8B4	2.82843	0.0300197	0.0163252	0	Inf	Resistant		dasatinib	LN_EC50	BIEA	2.34812	0.0283708	0.594512	-0.467935	1.06245	Resistant
			dasatinib	LN_EC50	TEX13C	2.52725	0.0448459	0.0243293	0	Inf	Resistant		dasatinib	LN_EC50	TCAL5	3.413	0.00269134	1.52362	-0.0120798	1.5357	Resistant
			dasatinib	LN_IC50	ENPP4	3.57136	0.0374296	3.1576	1.25285	2.52033	Resistant		dasatinib	LN_EC50	EFNB2	-2.57797	0.0204225	-0.0838904	1.1126	-1.19649	Sensitive
			dasatinib	LN_IC50	KLHL13	-10.0695	0.000558216	0.871393	2.98999	0.291437	Sensitive		dasatinib	LN_EC50	NGAL	-2.21371	0.0454691	-0.98396	0.758794	-1.74275	Sensitive
			dasatinib	LN_IC50	MTMR7	4.17434	0.0183435	0.796368	0.331196	2.40452	Resistant		dasatinib	LN_EC50	IFM3	-3.43567	0.00275511	-0.6241	0.976772	-1.60087	Sensitive
			dasatinib	LN_IC50	YBX2	5.05438	0.0072619	4.93935	1.8206	2.71304	Resistant		dasatinib	LN_EC50	RTN2	2.20399	0.0484908	1.1132	-0.452788	1.56598	Resistant
			dasatinib	LN_IC50	ADAM22	5.04429	0.0111336	2.06278	0.570126	3.61811	Resistant		dasatinib	LN_EC50	PCLI1	15.9875	0.00388955	1.08119	-2.61815	3.69934	Resistant
			dasatinib	LN_IC50	PAX7	-8.08926	0.0149405	0	0.0379526	0	Sensitive		dasatinib	LN_EC50	S39A3	10.9423	0.00824863	0.318027	-0.770213	1.08824	Resistant
			dasatinib	LN_IC50	IL20RA	-7.78097	0.0014718	0.567981	4.20944	0.13493	Sensitive		dasatinib	LN_EC50	HMGA2	-2.21865	0.045782	-2.1373	-0.285183	-1.85212	Sensitive
			dasatinib	LN_IC50	SYT13	7.75919	0.0136915	0.899977	0.0517113	17.4039	Resistant		dasatinib	LN_EC50	GLPT	2.37963	0.032689	0.585585	-0.547592	1.13318	Resistant
			dasatinib	LN_IC50	CHRDL2	4.26327	0.0131788	0.12852	0.0188612	6.81402	Resistant		dasatinib	LN_EC50	LEG9C	-2.27997	0.0477973	-0.536182	1.30449	-1.84067	Sensitive
			dasatinib	LN_IC50	ZNF280C	4.62688	0.0423813	2.13309	0.985166	2.16521	Resistant		dasatinib	LN_EC50	GTSF1	-3.08625	0.0350308	-1.00865	2.15511	-3.16376	Sensitive
			dasatinib	LN_IC50	DGAT2	4.75215	0.0225657	3.91772	1.39909	2.80019	Resistant		dasatinib	LN_EC50	ICAM2	-2.81283	0.0439442	-0.894141	1.22276	-2.11691	Sensitive
			dasatinib	LN_IC50	ANKRD44	2.78933	0.0493931	1.55272	0.487958	3.18207	Resistant		dasatinib	LN_EC50	CV039	2.61508	0.0493359	0.998221	-0.00365549	1.00188	Resistant
			dasatinib	LN_IC50	ZMYND12	3.44031	0.0402561	0.545345	0.253891	2.14795	Resistant		dasatinib	LN_EC50	CKLF7	-2.74786	0.0178864	-1.58374	0.259875	-1.84361	Sensitive
			dasatinib	LN_IC50	FGF22	-6.28766	0.0142417	0.136281	0.414894	0.328471	Sensitive		dasatinib	LN_EC50	ZN652	2.82828	0.0144451	0.571786	-0.43558	1.00737	Resistant
			dasatinib	LN_IC50	TRIB2	7.35195	0.0146563	4.61824	1.97005	2.34422	Resistant		dasatinib	LN_EC50	KLF12	-2.8129	0.0193893	-0.489025	0.607074	-1.0961	Sensitive
			dasatinib	LN_IC50	TIGAR	5.80085	0.0143885	2.39751	0.703602	3.40748	Resistant		dasatinib	LN_EC50	KLF5	-2.48867	0.0251715	-0.874453	0.75534	-1.62979	Sensitive
			dasatinib	LN_IC50	LXN	3.71291	0.0211372	5.5845	0.99559	5.60924	Resistant		dasatinib	LN_IC50	SOX1	-3.60998	0.0365042	-1.18237	1.35004	-2.53242	Sensitive
			dasatinib	LN_IC50	RAPGEF3	-7.17308	0.00417382	1.03358	5.11828	0.20194	Sensitive		dasatinib	LN_IC50	MMP14	-2.80083	0.013687	-0.677637	0.824558	-1.5022	Sensitive
			dasatinib	LN_IC50	DNAAF6	-6.62856	0.00801109	0.00952305	0.079506	0.119778	Sensitive		dasatinib	LN_IC50	PDLI3	2.18495	0.0441149	0.594367	-0.701103	1.29547	Resistant
			dasatinib	LN_IC50	KCNN2	4.17064	0.0442001	0.124047	0.0379526	3.26847	Resistant		dasatinib	LN_IC50	UBQL1	-37.6581	0.0169013	-1.22234	0.369242	-1.59158	Sensitive
			dasatinib	LN_IC50	IGSF9B	3.98597	0.0191968	0.60956	0.232491	2.62186	Resistant		dasatinib	LN_IC50	E2F5	3.11236	0.0241594	-0.0347871	-1.13199	1.0972	Resistant
			dasatinib	LN_IC50	AP4E1	3.33847	0.0478625	3.37024	1.36635	2.46661	Resistant		dasatinib	LN_IC50	ADCK1	9.30397	0.000742592	0.535401	-0.623019	1.15842	Resistant
			dasatinib	LN_IC50	CDH7	-17.9942	0.00168161	0.101671	0.562315	0.180808	Sensitive		dasatinib	LN_IC50	POSTN	2.65051	0.0311264	0.613719	-1.14233	1.75604	Resistant
			dasatinib	LN_IC50	APOB	2.82829	0.0474483	0.0472454	0.00952305	4.96116	Resistant		dasatinib	LN_IC50	ALDH2	-3.68433	0.00305536	-0.943115	1.15031	-2.09342	Sensitive
			dasatinib	LN_IC50	GCKR	-5.79263	0.0285328	0	0.128395	0	Sensitive		dasatinib	LN_IC50	MYO1B	-2.43791	0.0322726	-0.040347	1.0902	-1.13055	Sensitive
			dasatinib	LN_IC50	ERO1B	-4.16388	0.0482255	0.534538	2.61097	0.204727	Sensitive		dasatinib	LN_IC50	MYH3	-2.68358	0.0273284	-0.355223	1.08458	-1.43981	Sensitive
			dasatinib	LN_IC50	ACHE	4.74864	0.0271593	0.753999	0.290122	2.59891	Resistant		dasatinib	LN_IC50	STMN2	3.10179	0.00770152	0.390231	-0.704452	1.09468	Resistant
			dasatinib	LN_IC50	PHACTR3	-4.48658	0.0193316	0.612324	1.72264	0.355457	Sensitive		dasatinib	LN_IC50	FA89A	-3.65133	0.00559494	-0.73383	0.872849	-1.60668	Sensitive
			dasatinib	LN_IC50	SMOX	4.01998	0.0332775	5.00387	2.4717	2.02447	Resistant		dasatinib	LN_IC50	EFNB1	-3.14716	0.00830004	-0.663454	0.780297	-1.44375	Sensitive
			dasatinib	LN_IC50	SLC7A8	-8.8831	0.000894887	1.44934	4.9242	0.294329	Sensitive		dasatinib	LN_IC50	CTND1	-2.57953	0.0219337	0.145885	1.51385	-1.36797	Sensitive
			dasatinib	LN_IC50	RPGRIP1	-3.89803	0.0211279	0.175749	0.717997	0.244777	Sensitive		dasatinib	LN_IC50	NFIP2	-3.77674	0.00609406	-0.271533	1.49245	-1.76398	Sensitive
			dasatinib	LN_IC50	SEMA6A	2.87418	0.0460386	1.50284	0.528546	2.84336	Resistant		dasatinib	LN_IC50	HDA10	3.05349	0.0332069	0.486087	-0.879309	1.3654	Resistant
			dasatinib	LN_IC50	NRP1	6.26734	0.00364255	4.8706	1.86895	2.60606	Resistant		dasatinib	LN_IC50	RBY1B	-2.71192	0.0367617	-0.879612	0.738904	-1.61852	Sensitive
			dasatinib	LN_IC50	GALNT16	4.07688	0.0172648	1.3059	0.194402	6.71753	Resistant		dasatinib	LN_IC50	ERN2	-3.81455	0.0316901	-0.84158	0.481355	-1.32294	Sensitive
			dasatinib	LN_IC50	BDKRB1	-3.48978	0.0397275	0.550777	1.90533	0.289072	Sensitive		dasatinib	LN_IC50	CAND2	3.0884	0.00706486	0.600565	-0.465511	1.06608	Resistant
			dasatinib	LN_IC50	NFATC2	6.78371	0.0210275	2.42282	0.0472907	51.2324	Resistant		dasatinib	LN_IC50	CAND1	3.47639	0.00325306	0.634926	-0.48959	1.12452	Resistant
			dasatinib	LN_IC50	RIMS4	53.8802	7.74584e-05	2.4066	0.0284296	84.6514	Resistant		dasatinib	LN_IC50	LRC8B	7.17149	0.000819949	0.0147838	-1.24876	1.26355	Resistant
			dasatinib	LN_IC50	VSIG1	-5.39493	0.00750185	0.0467517	0.234419	0.199437	Sensitive		dasatinib	LN_IC50	LRC8C	-3.28808	0.00498303	-0.509584	0.596116	-1.1057	Sensitive
			dasatinib	LN_IC50	PAGE4	-3.05211	0.0379544	0.0414427	0.221191	0.187362	Sensitive		dasatinib	LN_IC50	SSFA2	-5.31518	0.000100807	-0.360074	1.07645	-1.43653	Sensitive
			dasatinib	LN_IC50	SCML2	4.92838	0.00936151	2.28213	0.609934	3.74161	Resistant		dasatinib	LN_IC50	FMNL2	-2.64929	0.0194305	-0.347373	0.758269	-1.10564	Sensitive
			dasatinib	LN_IC50	CCL22	-4.79891	0.0383263	0.175573	0.728138	0.241125	Sensitive		dasatinib	LN_IC50	AGRIN	-5.9218	3.75742e-05	0.0183633	1.39989	-1.38153	Sensitive
			dasatinib	LN_IC50	CCL17	-4.58767	0.0431289	0.087197	0.294733	0.295851	Sensitive		dasatinib	LN_IC50	PALM	-3.95177	0.00183144	0.207766	1.62762	-1.41985	Sensitive
			dasatinib	LN_IC50	AMH	5.87648	0.026527	3.76913	0.746661	5.04797	Resistant		dasatinib	LN_IC50	DHX58	5.53114	0.00147162	0.366117	-0.690471	1.05659	Resistant
			dasatinib	LN_IC50	SCN1B	8.29265	0.00536856	2.36184	0.589602	4.00583	Resistant		dasatinib	LN_IC50	TEN3	3.38096	0.00796224	0.189925	-1.38849	1.57841	Resistant
			dasatinib	LN_IC50	HOXA13	-4.84955	0.0393521	0.317328	1.49553	0.212184	Sensitive		dasatinib	LN_IC50	TPM1	2.25687	0.0416735	0.756453	-0.681346	1.4378	Resistant
			dasatinib	LN_IC50	PMP22	3.54577	0.0355018	5.01299	1.98968	2.5195	Resistant		dasatinib	LN_IC50	CN159	-2.35253	0.0322044	-0.395042	0.87414	-1.26918	Sensitive
			dasatinib	LN_IC50	CRACD	3.18764	0.0333869	1.71059	0.417734	4.09491	Resistant		dasatinib	LN_IC50	ADDG	-5.59552	4.48612e-05	-0.544665	0.737284	-1.28195	Sensitive
			dasatinib	LN_IC50	TECTA	3.96235	0.0176712	0.238055	0.0698723	3.407	Resistant		dasatinib	LN_IC50	MISP	-2.19346	0.0483218	-0.0362668	1.42251	-1.45878	Sensitive
			dasatinib	LN_IC50	CD5	1	0.42265	0.0047851	0	Inf	Resistant		dasatinib	LN_IC50	UAP1L	2.65296	0.0173647	0.498957	-0.928968	1.42792	Resistant
			dasatinib	LN_IC50	POU2AF1	-3.04951	0.0469254	0.0549717	0.3258	0.168728	Sensitive		dasatinib	LN_IC50	UAP1	2.67951	0.0164649	0.330275	-0.998682	1.32896	Resistant
			dasatinib	LN_IC50	SLC6A12	3.71098	0.0454357	0.370824	0.069859	5.30819	Resistant		dasatinib	LN_IC50	ADK	4.04365	0.00121472	0.759001	-0.275389	1.03439	Resistant
			dasatinib	LN_IC50	MGP	6.13464	0.0207544	8.28416	1.06613	7.77029	Resistant		dasatinib	LN_IC50	LTBP4	-3.43427	0.0311849	-1.38713	-0.0329526	-1.35418	Sensitive
			dasatinib	LN_IC50	ARHGDIB	-13.0552	0.00491883	2.22152	7.43457	0.298809	Sensitive		dasatinib	LN_IC50	LAMA3	-3.76408	0.00315312	-0.322559	1.48336	-1.80592	Sensitive
			dasatinib	LN_IC50	BMP5	10.4931	0.00622874	1.10833	0.0234631	47.2372	Resistant		dasatinib	LN_IC50	LAMA5	-8.19071	1.06382e-05	0.0750596	1.57557	-1.50051	Sensitive
			dasatinib	LN_IC50	RBM24	3.46208	0.0293609	2.18062	0.80482	2.70945	Resistant		dasatinib	LN_IC50	B8ZZW7	2.33637	0.0406825	0.0739847	-1.02458	1.09857	Resistant
			dasatinib	LN_IC50	SLC16A10	-5.63753	0.00490644	0.186858	0.930474	0.200821	Sensitive		dasatinib	LN_IC50	COT2	-2.89303	0.0113506	0.331609	1.68615	-1.35454	Sensitive
			dasatinib	LN_IC50	SMOC2	4.76508	0.0413032	1.77233	0.0238312	74.3701	Resistant		dasatinib	LN_IC50	TAGL2	2.99977	0.0104305	0.379318	-0.693898	1.07322	Resistant
			dasatinib	LN_IC50	TENT5A	4.03083	0.0394398	3.90812	1.391	2.80957	Resistant		dasatinib	LN_IC50	TNAP2	-3.18956	0.00654133	0.109558	1.67038	-1.56082	Sensitive
			dasatinib	LN_IC50	CDX1	-4.97044	0.0381744	0.0047851	0.0285692	0.167492	Sensitive		dasatinib	LN_IC50	LAMB3	-5.92498	0.000209903	-0.429122	1.92721	-2.35633	Sensitive
			dasatinib	LN_IC50	LOXL3	3.83849	0.0189637	2.41563	0.727852	3.31884	Resistant		dasatinib	LN_IC50	ZN131	-4.69832	0.00069595	-0.454839	0.732705	-1.18754	Sensitive
			dasatinib	LN_IC50	KCNJ13	-6.51314	0.0214283	0.154098	0.374798	0.411151	Sensitive		dasatinib	LN_IC50	AMOL1	-2.5343	0.0339391	-0.15015	0.944079	-1.09423	Sensitive
			dasatinib	LN_IC50	WIPF1	9.85209	0.00275221	4.21292	0.450464	9.35241	Resistant		dasatinib	LN_IC50	FAS	3.6506	0.00215687	0.796078	-0.780767	1.57684	Resistant
			dasatinib	LN_IC50	MARK1	-3.7707	0.0196337	0.846324	2.96793	0.285157	Sensitive		dasatinib	LN_IC50	CQ096	-6.6545	0.00301735	-1.68766	-0.467791	-1.21986	Sensitive
			dasatinib	LN_IC50	APOA1	3.26522	0.0479473	0.49405	0.139571	3.53978	Resistant		dasatinib	LN_IC50	GLT12	-4.01969	0.00378063	-0.881051	0.258808	-1.13986	Sensitive
			dasatinib	LN_IC50	SLC8A2	-7.80377	0.00671966	0.149084	1.10632	0.134756	Sensitive		dasatinib	LN_IC50	GALT5	-5.6616	0.000127139	-0.956082	0.694153	-1.65023	Sensitive
			dasatinib	LN_IC50	SLC16A7	3.89457	0.0251393	1.74897	0.543022	3.22081	Resistant		dasatinib	LN_IC50	ITIH5	-3.39673	0.0425634	-0.280005	0.76225	-1.04225	Sensitive
			dasatinib	LN_IC50	CSF3R	-4.1911	0.0302192	0.0513981	0.353063	0.145578	Sensitive		dasatinib	LN_IC50	B4DXK4	-4.3161	0.00230722	-0.0570719	4.9911	-5.04818	Sensitive
			dasatinib	LN_IC50	NKX2.3	-8.15324	0.0100025	0.04206	0.979577	0.0429369	Sensitive		dasatinib	LN_IC50	ARSE	-4.57923	0.00285527	-0.732368	1.40656	-2.13893	Sensitive
			dasatinib	LN_IC50	HOXB1	-10.9829	0.00818859	0	0.435438	0	Sensitive		dasatinib	LN_IC50	STS	-2.99218	0.0155112	-0.308508	1.65379	-1.96229	Sensitive
			dasatinib	LN_IC50	TP53AIP1	-12.0922	0.00491248	0.0930105	0.79681	0.116729	Sensitive		dasatinib	LN_IC50	TAU	3.70479	0.00792893	2.79558	-1.82981	4.62538	Resistant
			dasatinib	LN_IC50	ZRANB3	18.19	6.3365e-05	2.57602	1.12905	2.28158	Resistant		dasatinib	LN_IC50	NKX25	-4.49248	0.0461456	-0.351949	1.17654	-1.52848	Sensitive
			dasatinib	LN_IC50	SASH3	-3.53946	0.0272095	0.0467517	0.171748	0.272211	Sensitive		dasatinib	LN_IC50	NCAM1	3.57301	0.00402175	0.0114865	-1.7086	1.72009	Resistant
			dasatinib	LN_IC50	SLC36A1	5.21384	0.0117065	3.0553	1.10313	2.76966	Resistant		dasatinib	LN_IC50	AL3A1	-3.11356	0.0148938	-1.23058	0.568319	-1.7989	Sensitive
			dasatinib	LN_IC50	ZBP1	5.65486	0.0298776	0.188263	0	Inf	Resistant		dasatinib	LN_IC50	AL3B1	-2.64258	0.0236403	-0.290915	1.20163	-1.49255	Sensitive
			dasatinib	LN_IC50	MOCS1	4.14688	0.0488406	2.4547	0.795346	3.08633	Resistant		dasatinib	LN_IC50	AL3A2	-3.80808	0.00209029	-0.267138	0.745348	-1.01249	Sensitive
			dasatinib	LN_IC50	SH3TC1	-5.5346	0.018834	0.647516	2.21953	0.291736	Sensitive		dasatinib	LN_IC50	DHAK	3.33757	0.00417619	0.38218	-0.762431	1.14461	Resistant
			dasatinib	LN_IC50	F10	-8.72005	0.00321111	0.196471	0.565336	0.34753	Sensitive		dasatinib	LN_IC50	GNPI2	3.06535	0.0141067	0.473202	-0.899677	1.37288	Resistant
			dasatinib	LN_IC50	PRKCG	-20.4285	0.000951706	0.0835124	0.687005	0.12156	Sensitive		dasatinib	LN_IC50	CP2U1	-3.62716	0.00891779	-0.454813	0.698311	-1.15312	Sensitive
			dasatinib	LN_IC50	LRRC61	5.69007	0.00518426	3.77372	1.71228	2.20391	Resistant		dasatinib	LN_IC50	AKT2	2.97421	0.00973774	0.540161	-0.462485	1.00265	Resistant
			dasatinib	LN_IC50	GNAZ	4.29539	0.0484642	1.97608	0.653186	3.0253	Resistant		dasatinib	LN_IC50	AKT1	2.5235	0.0280505	0.522815	-0.540925	1.06374	Resistant
			dasatinib	LN_IC50	MCHR1	-3.25726	0.0344929	0.0236463	0.115132	0.205384	Sensitive		dasatinib	LN_IC50	COFA1	-24.2088	0.026282	-0.874091	0.392855	-1.26695	Sensitive
			dasatinib	LN_IC50	HOXD1	-12.9525	0.0036258	0.0280214	1.49438	0.0187512	Sensitive		dasatinib	LN_IC50	GAK	3.67232	0.00238633	0.36683	-0.746231	1.11306	Resistant
			dasatinib	LN_IC50	HOXD3	-73.3289	2.22175e-05	0.0047851	0.968294	0.00494178	Sensitive		dasatinib	LN_IC50	FLNB	-2.306	0.0427276	0.366697	1.40702	-1.04032	Sensitive
			dasatinib	LN_IC50	CHN1	8.96035	0.0102121	3.8594	0.334237	11.5469	Resistant		dasatinib	LN_IC50	FLNB	-2.58284	0.0262038	-0.64192	2.54019	-3.18211	Sensitive
			dasatinib	LN_IC50	CALML4	4.66944	0.0421262	4.1539	1.80511	2.30119	Resistant		dasatinib	LN_IC50	EHF	-3.61303	0.0108931	0.49503	3.02549	-2.53046	Sensitive
			dasatinib	LN_IC50	LOXL1	4.8804	0.0378676	3.90685	1.11087	3.51692	Resistant		dasatinib	LN_IC50	PGBM	-3.23166	0.0094731	-0.572625	0.636679	-1.2093	Sensitive
			dasatinib	LN_IC50	LRRC6	5.69007	0.00518426	3.77372	1.71228	2.20391	Resistant		dasatinib	LN_IC50	K1199	-18.929	2.85585e-07	-1.04285	3.93645	-4.9793	Sensitive
			dasatinib	LN_IC50	MAP7D3	3.01452	0.0406451	3.97454	1.34292	2.95963	Resistant		dasatinib	LN_IC50	CF132	-2.83393	0.0134303	0.0889103	1.92971	-1.8408	Sensitive
			dasatinib	LN_IC50	LBP	-4.97044	0.0381744	0.0047851	0.0285692	0.167492	Sensitive		dasatinib	LN_IC50	GNAI1	-3.25836	0.00542701	-0.190765	0.912204	-1.10297	Sensitive
			dasatinib	LN_IC50	CHSY1	3.56983	0.0311098	4.91495	2.32733	2.11184	Resistant		dasatinib	LN_IC50	GNA15	-2.42835	0.0473897	-0.686693	1.60987	-2.29657	Sensitive
			dasatinib	LN_IC50	RTBDN	-4.0268	0.0431674	0.609597	1.78204	0.342078	Sensitive		dasatinib	LN_IC50	TENA	2.533	0.0311264	0.217419	-1.19367	1.41109	Resistant
			dasatinib	LN_IC50	MATN3	7.62998	0.00602459	2.36779	0.552271	4.28738	Resistant		dasatinib	LN_IC50	APOB	-2.16062	0.0462364	0.134366	1.37669	-1.24232	Sensitive
			dasatinib	LN_IC50	ATP1A4	-19.4537	0.000236742	0.0142148	0.587705	0.0241869	Sensitive		dasatinib	LN_IC50	MATN2	-3.19011	0.00793912	-0.109314	1.12663	-1.23594	Sensitive
			dasatinib	LN_IC50	KL	-10.0695	0.000558216	0.871393	2.98999	0.291437	Sensitive		dasatinib	LN_IC50	RB8NL	-4.04665	0.00985787	1.00339	3.67841	-2.67502	Sensitive
			dasatinib	LN_IC50	RNF128	-4.26263	0.014418	0.428019	2.7011	0.158461	Sensitive		dasatinib	LN_IC50	PA1B3	3.09376	0.00773595	0.616718	-0.684936	1.30165	Resistant
			dasatinib	LN_IC50	PRAM1	-9.18706	0.000861308	0.136675	0.555207	0.24617	Sensitive		dasatinib	LN_IC50	PDLI1	-4.76855	0.000215522	-0.575048	1.23148	-1.80653	Sensitive
			dasatinib	LN_IC50	PDE6B	7.47365	0.0146404	2.73771	0.0630113	43.4479	Resistant		dasatinib	LN_IC50	LRP5	-5.39467	9.59853e-05	-0.270563	1.1603	-1.43086	Sensitive
			dasatinib	LN_IC50	PDZD2	-4.24736	0.0209792	1.07565	3.81006	0.282318	Sensitive		dasatinib	LN_IC50	RASL1	-3.35215	0.0124326	-0.928412	0.616828	-1.54524	Sensitive
			dasatinib	LN_IC50	CAMK1	0.942536	0.424758	0.0649058	0.0284296	2.28304	Resistant		dasatinib	LN_IC50	SNPC5	6.72304	0.0214161	0.0979022	-1.06269	1.16059	Resistant
			dasatinib	LN_IC50	DTNA	5.88766	0.024496	3.84872	0.334548	11.5042	Resistant		dasatinib	LN_IC50	SPTN1	-3.41075	0.00648001	-0.457679	0.772287	-1.22997	Sensitive
			dasatinib	LN_IC50	DAGLA	3.66572	0.043155	2.43465	0.835297	2.91472	Resistant		dasatinib	LN_IC50	SPTN1	-4.8507	0.000212367	-0.647601	0.673581	-1.32118	Sensitive
			dasatinib	LN_IC50	GGACT	12.6377	0.00451822	2.0058	0.242303	8.27808	Resistant		dasatinib	LN_IC50	MAGC1	-2.42867	0.045285	-0.526952	1.87851	-2.40546	Sensitive
			dasatinib	LN_IC50	CEMIP2	5.00623	0.00809485	4.81904	2.35459	2.04666	Resistant		dasatinib	LN_IC50	MAGB4	-32.0665	0.0198467	-0.675065	1.83178	-2.50685	Sensitive
			dasatinib	LN_IC50	FAM189A2	8.12023	0.0148084	2.47716	0.0611855	40.4861	Resistant		dasatinib	LN_IC50	DNHD1	3.70299	0.0133984	0.198865	-1.3601	1.55896	Resistant
			dasatinib	LN_IC50	DOCK10	4.07534	0.0228546	2.314	0.967562	2.39158	Resistant		dasatinib	LN_IC50	PKP2	-3.90093	0.00138968	-0.0332943	1.85588	-1.88917	Sensitive
			dasatinib	LN_IC50	UGGT1	4.07274	0.0392977	4.93295	2.3328	2.11461	Resistant		dasatinib	LN_IC50	NHRF1	3.16771	0.00880616	1.26568	-0.362368	1.62805	Resistant
			dasatinib	LN_IC50	WDR38	-7.30229	0.00191867	0.0188612	0.222101	0.0849217	Sensitive		dasatinib	LN_IC50	TNI3K	3.3741	0.00875761	0.492156	-0.874613	1.36677	Resistant
			dasatinib	LN_IC50	IL33	-3.53516	0.0241338	0.00957019	0.0332609	0.287731	Sensitive		dasatinib	LN_IC50	DCTP1	3.35296	0.00404255	0.430398	-0.664641	1.09504	Resistant
			dasatinib	LN_IC50	C6orf52	3.3597	0.0289168	2.17014	0.49468	4.38695	Resistant		dasatinib	LN_IC50	MSLN	-2.94116	0.0137749	-0.439867	2.35239	-2.79225	Sensitive
			dasatinib	LN_IC50	TMPRSS4	-4.16546	0.0305933	2.29318	5.42196	0.422944	Sensitive		dasatinib	LN_IC50	MOCS3	2.9297	0.00981665	0.179698	-0.851143	1.03084	Resistant
			dasatinib	LN_IC50	BRDT	-3.20531	0.0476945	0.0142148	0.110542	0.128591	Sensitive		dasatinib	LN_IC50	CTR2	2.28214	0.0405559	0.0427867	-1.01886	1.06165	Resistant
			dasatinib	LN_IC50	AOX1	6.29329	0.00633046	1.43844	0.210419	6.83606	Resistant		dasatinib	LN_IC50	TT39A	2.82787	0.0300418	1.861	0.132604	1.7284	Resistant
			dasatinib	LN_IC50	CARF	4.35106	0.0132284	2.26577	0.736764	3.0753	Resistant		dasatinib	LN_IC50	TBB4A	2.46323	0.0314818	-0.303422	-1.7497	1.44627	Resistant
			dasatinib	LN_IC50	GLCE	5.49733	0.00540212	4.03952	2.01307	2.00664	Resistant		dasatinib	LN_IC50	RHOF	-2.66507	0.023184	-0.637353	0.54175	-1.1791	Sensitive
			dasatinib	LN_IC50	PIK3C2G	-6.10135	0.0145624	0.13462	0.552172	0.2438	Sensitive		dasatinib	LN_IC50	ERG1	3.79543	0.00190308	0.336473	-0.84782	1.18429	Resistant
			dasatinib	LN_IC50	TMEM117	-14.0082	0.00129792	0.930433	1.99178	0.467137	Sensitive		dasatinib	LN_IC50	FRIL	-2.59784	0.0194717	-0.526485	0.803322	-1.32981	Sensitive
			dasatinib	LN_IC50	MTMR6	3.51081	0.0246539	3.84866	1.78805	2.15244	Resistant		dasatinib	LN_IC50	PGM2L	2.19803	0.044599	0.497818	-0.722309	1.22013	Resistant
			dasatinib	LN_IC50	LYSMD2	2.92956	0.0428525	3.11672	1.05934	2.94214	Resistant		dasatinib	LN_IC50	RAI14	-3.87199	0.00136731	-0.0776965	1.20341	-1.28111	Sensitive
			dasatinib	LN_IC50	TSPAN3	-1.35772	0.298636	0.0189999	0.103932	0.18281	Sensitive		dasatinib	LN_IC50	ICAM5	-2.88093	0.0269018	-0.402543	1.22913	-1.63167	Sensitive
			dasatinib	LN_IC50	SLC5A2	-5.31491	0.0162637	0.301268	0.964216	0.312448	Sensitive		dasatinib	LN_IC50	ATP23	2.7275	0.0217673	0.668458	-0.875179	1.54364	Resistant
			dasatinib	LN_IC50	KSR1	4.01451	0.0173852	4.12906	1.4722	2.80469	Resistant		dasatinib	LN_IC50	TTYH3	-2.181	0.0476723	-0.244523	0.91854	-1.16306	Sensitive
			dasatinib	LN_IC50	SLC14A1	-4.30186	0.0263418	0.0827235	0.536455	0.154204	Sensitive		dasatinib	LN_IC50	TEX15	-3.09818	0.00962411	-0.561109	0.562892	-1.124	Sensitive
			dasatinib	LN_IC50	CACNG8	-3.49276	0.0386224	0.0509658	0.330037	0.154425	Sensitive		dasatinib	LN_IC50	MST4	5.40415	6.7614e-05	0.389773	-0.640759	1.03053	Resistant
			dasatinib	LN_IC50	CASQ1	-6.31776	0.0241499	0.170943	0.722466	0.23661	Sensitive		dasatinib	LN_IC50	SHRM3	-3.31584	0.00482638	0.0114023	1.55935	-1.54795	Sensitive
			dasatinib	LN_IC50	SYT2	-4.53984	0.0287996	0.0472009	0.106558	0.442961	Sensitive		dasatinib	LN_IC50	DOCK8	4.20403	0.0136515	0.0988654	-1.77875	1.87761	Resistant
			dasatinib	LN_IC50	GALM	-3.77464	0.0337351	1.22344	5.20382	0.235103	Sensitive		dasatinib	LN_IC50	RILP	-3.55689	0.0314857	0.0381497	1.8648	-1.82665	Sensitive
			dasatinib	LN_IC50	RUBCN	2.2445	0.15307	1.3109	0.0650739	20.1448	Resistant		dasatinib	LN_IC50	CPEB3	7.84195	2.59511e-05	0.0162638	-1.62587	1.64214	Resistant
			dasatinib	LN_IC50	SCD5	5.72669	0.0272947	3.73057	1.81173	2.05912	Resistant		dasatinib	LN_IC50	ERF3A	3.76794	0.00185022	0.168178	-0.842238	1.01042	Resistant
			dasatinib	LN_IC50	CYP4V2	-7.44362	0.00174862	0.8501	2.53595	0.335219	Sensitive		dasatinib	LN_IC50	SG223	-3.12442	0.00827886	0.150177	1.2322	-1.08202	Sensitive
			dasatinib	LN_IC50	PIK3R1	9.19596	0.00477946	3.58033	1.78026	2.01113	Resistant		dasatinib	LN_IC50	LMTK3	-13.9035	0.0457096	0.193196	1.44405	-1.25086	Sensitive
			dasatinib	LN_IC50	TIMD4	-8.08926	0.0149405	0	0.0379526	0	Sensitive		dasatinib	LN_IC50	SON	-9.18967	0.0116351	-0.846765	0.667426	-1.51419	Sensitive
			dasatinib	LN_IC50	CLTRN	-4.08994	0.0248948	0.259683	0.583954	0.444698	Sensitive		dasatinib	LN_IC50	TOR4A	-5.9327	0.000915208	-0.786057	0.909957	-1.69601	Sensitive
			dasatinib	LN_IC50	RSPO2	8.62322	0.0131828	0.102001	0	Inf	Resistant		dasatinib	LN_IC50	SRCN1	3.06502	0.0276047	0.818328	-0.888817	1.70714	Resistant
			dasatinib	LN_IC50	PDSS1	3.05084	0.0490976	4.3433	2.07877	2.08937	Resistant		dasatinib	LN_IC50	MBNL2	-13.671	9.51606e-06	-0.607727	1.89657	-2.50429	Sensitive
			dasatinib	LN_IC50	ADIRF	-5.96435	0.0267146	5.20616	10.5231	0.494735	Sensitive		dasatinib	LN_IC50	1A24	-2.73895	0.0151995	-1.73639	1.60717	-3.34356	Sensitive
			dasatinib	LN_IC50	TLCD3B	3.32901	0.0427757	1.31069	0.384229	3.41121	Resistant		dasatinib	LN_IC50	1A25	-2.96065	0.0116169	-0.81069	2.07925	-2.88994	Sensitive
			dasatinib	LN_IC50	FSIP1	-4.11321	0.0244961	0.594105	1.44447	0.411295	Sensitive		dasatinib	LN_IC50	1A68	-2.38617	0.0426294	-1.21778	1.94915	-3.16692	Sensitive
			dasatinib	LN_IC50	PIP4K2A	4.31541	0.0207964	4.19722	1.75129	2.39664	Resistant		dasatinib	LN_IC50	1B38	-38.1504	0.0166833	-0.0999386	5.6496	-5.74954	Sensitive
			dasatinib	LN_IC50	TMEM45B	-9.963	0.00360598	0.93351	4.75082	0.196494	Sensitive		dasatinib	LN_IC50	HLAG	-116.677	0.00545614	-0.411765	4.71188	-5.12364	Sensitive
			dasatinib	LN_IC50	CD8A	3.71186	0.0206466	0.742892	0.176782	4.20231	Resistant		dasatinib	LN_IC50	1C02	-2.30865	0.0396531	-0.299132	2.10866	-2.4078	Sensitive
			dasatinib	LN_IC50	RETREG1	-3.07822	0.0444676	1.70698	3.48152	0.490297	Sensitive		dasatinib	LN_IC50	HLAF	-2.34213	0.0358106	-0.053845	1.08696	-1.14081	Sensitive
			dasatinib	LN_IC50	CERS3	-5.62914	0.0296555	0.0378611	1.20454	0.0314319	Sensitive		dasatinib	LN_IC50	SOX4	-3.37882	0.0278158	0.330289	2.77231	-2.44202	Sensitive
			dasatinib	LN_IC50	TRIM74	-4.54721	0.0447329	0.259893	0.568836	0.456887	Sensitive		dasatinib	LN_IC50	TIGAR	2.69261	0.0164275	-0.0943609	-1.09774	1.00337	Resistant
			dasatinib	LN_IC50	SLC26A2	4.34369	0.0182943	4.31414	1.24432	3.46707	Resistant		dasatinib	LN_IC50	TBCE	3.05868	0.00887346	0.359999	-0.729106	1.08911	Resistant
			dasatinib	LN_IC50	EXOG	4.69566	0.0317904	3.51263	1.44636	2.4286	Resistant		dasatinib	LN_IC50	TNIP2	3.21692	0.0166103	1.30114	-0.794435	2.09557	Resistant
			dasatinib	LN_IC50	FZD1	0.9742	0.43268	1.10538	0.0284296	38.8814	Resistant		dasatinib	LN_IC50	K121L	-3.15268	0.0161604	0.0389363	1.87308	-1.83414	Sensitive
			dasatinib	LN_IC50	DPYSL5	-4.10418	0.0166325	0.258547	1.39123	0.185841	Sensitive		dasatinib	LN_IC50	MYOF	-2.39747	0.0410584	0.29048	1.57008	-1.2796	Sensitive
			dasatinib	LN_IC50	KRTCAP3	24.6437	0.00164092	5.45875	1.66751	3.27359	Resistant		dasatinib	LN_IC50	DYSF	-3.37806	0.0079196	-0.127967	1.31264	-1.4406	Sensitive
			dasatinib	LN_IC50	PLA2G4D	-3.6367	0.0474386	0.0285229	0.115132	0.247741	Sensitive		dasatinib	LN_IC50	EVL	2.35462	0.031972	0.602296	-0.64112	1.24342	Resistant
			dasatinib	LN_IC50	C16orf86	-5.69882	0.00935068	0.432792	1.29101	0.335235	Sensitive		dasatinib	LN_IC50	BCAP	-4.0567	0.00482972	-0.915439	0.25601	-1.17145	Sensitive
			dasatinib	LN_IC50	PTH1R	3.02505	0.0423683	0.316851	0.108999	2.90691	Resistant		dasatinib	LN_IC50	G3V1L9	-3.33183	0.00425619	-0.40287	0.658491	-1.06136	Sensitive
			dasatinib	LN_IC50	KASH5	-4.31005	0.0417119	0.0325369	0.664407	0.0489714	Sensitive		dasatinib	LN_IC50	DSG2	-2.38436	0.0304563	0.149306	1.1928	-1.04349	Sensitive
			dasatinib	LN_IC50	MEIOB	-4.44039	0.0464981	0.00957019	0.351968	0.0271905	Sensitive		dasatinib	LN_IC50	SREC2	-2.91043	0.0173482	-0.393249	1.16219	-1.55544	Sensitive
			dasatinib	LN_IC50	ASRGL1	3.11031	0.0362636	4.09378	1.37866	2.9694	Resistant		dasatinib	LN_IC50	AAGAB	3.82619	0.001923	0.227844	-0.882695	1.11054	Resistant
			dasatinib	LN_IC50	ADGRL4	-7.91191	0.015602	0.0047851	0.0426443	0.112209	Sensitive		dasatinib	LN_IC50	FAT1	-2.34301	0.033681	-0.205884	0.875209	-1.08109	Sensitive
			dasatinib	LN_IC50	AXDND1	6.34791	0.0233224	0.451296	0.0379526	11.891	Resistant		dasatinib	LN_IC50	2B1B	-4.22054	0.0134717	-0.983613	2.7	-3.68361	Sensitive
			dasatinib	LN_IC50	FCMR	5.03291	0.0133489	1.99281	0.535702	3.71999	Resistant		dasatinib	LN_IC50	RAB3I	2.66313	0.0217174	0.721288	-0.557867	1.27915	Resistant
			dasatinib	LN_IC50	DISC1	8.88468	0.00421515	1.48344	0.30035	4.93902	Resistant		dasatinib	LN_IC50	KI67	-2.62851	0.0207982	-0.303964	0.887894	-1.19186	Sensitive
			dasatinib	LN_IC50	KBTBD8	3.6728	0.0233348	0.733603	0.196039	3.74212	Resistant		dasatinib	LN_IC50	MADD	-8.46876	0.0136581	0.518471	1.84783	-1.32935	Sensitive
			dasatinib	LN_IC50	ADORA1	6.63148	0.00313263	2.62485	0.53329	4.922	Resistant		dasatinib	LN_IC50	TRPC1	-5.44263	0.00553337	-0.551935	0.967759	-1.51969	Sensitive
			dasatinib	LN_IC50	MNDA	-5.02985	0.0373275	0	0.0238312	0	Sensitive		dasatinib	LN_IC50	ADH1G	-5.3851	0.0125441	-1.03173	0.116563	-1.14829	Sensitive
			dasatinib	LN_IC50	ASB5	8.08926	0.0149405	0.0379526	0	Inf	Resistant		dasatinib	LN_IC50	NRG1	-2.40144	0.0440676	-0.873626	0.797866	-1.67149	Sensitive
			dasatinib	LN_IC50	SYTL3	-3.81005	0.0374786	1.17861	2.99877	0.393031	Sensitive		dasatinib	LN_IC50	C9J6P4	-4.84929	0.0167358	-0.356114	0.985833	-1.34195	Sensitive
			dasatinib	LN_IC50	IQUB	-3.82786	0.0234138	0.256404	0.675305	0.379687	Sensitive		dasatinib	LN_IC50	PEPL	-2.56901	0.0265788	0.0677674	1.63343	-1.56566	Sensitive
			dasatinib	LN_IC50	PHKG1	4.15962	0.0298691	1.12204	0.530616	2.11459	Resistant		dasatinib	LN_IC50	SEM3D	-6.09211	0.00291118	-0.134636	1.02637	-1.161	Sensitive
			dasatinib	LN_IC50	C9orf24	-4.7407	0.0332397	0.160111	0.4989	0.320929	Sensitive		dasatinib	LN_IC50	SEM3A	-3.42678	0.00994978	-0.823798	0.420647	-1.24445	Sensitive
			dasatinib	LN_IC50	DYNLT3	5.96466	0.010937	4.71326	2.26018	2.08534	Resistant		dasatinib	LN_IC50	EPHA2	-2.90517	0.0105899	-0.596874	0.988428	-1.5853	Sensitive
			dasatinib	LN_IC50	RNF183	-3.86478	0.0203968	0.151973	0.466467	0.325796	Sensitive		dasatinib	LN_IC50	H3BNW5	-6.158	0.000495019	0.663991	2.75614	-2.09215	Sensitive
			dasatinib	LN_IC50	MAGEC3	8.03047	0.0060516	0.217901	0.0190461	11.4407	Resistant		dasatinib	LN_IC50	EGFR	-2.13052	0.0495402	-0.149573	1.31682	-1.46639	Sensitive
			dasatinib	LN_IC50	DRGX	-2.82839	0.0474277	0.0047851	0.0238312	0.200791	Sensitive		dasatinib	LN_IC50	PLEC	-2.87789	0.0121025	-0.166153	1.39692	-1.56308	Sensitive
			dasatinib	LN_IC50	KCNC2	-5.02985	0.0373275	0	0.0238312	0	Sensitive		dasatinib	LN_IC50	NUDT4	3.14966	0.0154909	-0.146211	-1.20317	1.05696	Resistant
			dasatinib	LN_IC50	SLC38A8	-6.63506	0.00806826	0.0143081	0.14166	0.101004	Sensitive		dasatinib	LN_IC50	PLCB1	4.21631	0.0024382	0.0670248	-1.47999	1.54701	Resistant
			dasatinib	LN_IC50	ART5	-3.59805	0.0352077	0.11664	0.395949	0.294583	Sensitive		dasatinib	LN_IC50	NEC1	52.4979	0.0121251	-0.13211	-5.56665	5.43454	Resistant
			dasatinib	LN_IC50	TUBA1A	5.50391	0.0226176	7.17756	2.2248	3.22616	Resistant		dasatinib	LN_IC50	CO3	-2.37462	0.0304285	-0.0795863	1.07824	-1.15782	Sensitive
			dasatinib	LN_IC50	SLC43A2	8.45257	0.00716419	4.81266	1.31518	3.65933	Resistant		dasatinib	LN_IC50	LMO7	-3.52431	0.00329218	-0.635216	0.935436	-1.57065	Sensitive
			dasatinib	LN_IC50	KRT80	4.30753	0.0258464	6.19799	2.45518	2.52445	Resistant		dasatinib	LN_IC50	H0YDG6	-3.38574	0.00526279	-1.18985	0.979294	-2.16915	Sensitive
			dasatinib	LN_IC50	RCOR2	4.18595	0.0390929	2.01898	0.641271	3.14841	Resistant		dasatinib	LN_IC50	LGR4	-4.12399	0.0409847	-0.244528	1.07401	-1.31854	Sensitive
			dasatinib	LN_IC50	MGAT5B	3.73774	0.0335586	3.11281	0.898665	3.46381	Resistant		dasatinib	LN_IC50	ABLM2	-3.40148	0.00501789	-0.532205	0.964265	-1.49647	Sensitive
			dasatinib	LN_IC50	NAALADL1	-3.32034	0.0305368	0.13384	0.451482	0.296447	Sensitive		dasatinib	LN_IC50	Q5T6N4	-5.66953	5.22954e-05	-0.44501	1.15762	-1.60263	Sensitive
			dasatinib	LN_IC50	KCNV2	5.33299	0.0061393	0.154717	0.0425075	3.63975	Resistant		dasatinib	LN_IC50	DEMA	-3.94618	0.00309353	-0.655015	0.860526	-1.51554	Sensitive
			dasatinib	LN_IC50	KIF5C	5.40994	0.0324078	1.89242	0.154834	12.2223	Resistant		dasatinib	LN_IC50	GLBL2	-4.1786	0.00318698	-0.1467	1.83066	-1.97736	Sensitive
			dasatinib	LN_IC50	LRP1B	-3.42293	0.0282107	0.0939038	0.416114	0.225669	Sensitive		dasatinib	LN_IC50	FGD3	9.57637	7.40954e-05	-0.223198	-1.73814	1.51494	Resistant
			dasatinib	LN_IC50	OR13J1	-7.08926	0.0193227	0	0.0332609	0	Sensitive		dasatinib	LN_IC50	KCMA1	2.76496	0.0386671	0.556808	-0.985386	1.54219	Resistant
			dasatinib	LN_IC50	IRS1	7.03644	0.0195884	4.5007	2.22855	2.01956	Resistant		dasatinib	LN_IC50	ENTP3	-414.641	0.00153535	-0.869677	3.26264	-4.13231	Sensitive
			dasatinib	LN_IC50	VXN	3.74393	0.0216011	1.35356	0.194988	6.94178	Resistant		dasatinib	LN_IC50	CP4FB	-2.80175	0.0221047	-0.580626	1.82329	-2.40391	Sensitive
			dasatinib	LN_IC50	GPRIN1	4.6649	0.0319996	3.20792	0.869646	3.68876	Resistant		dasatinib	LN_IC50	CP4FC	-2.75075	0.0149211	-0.819635	0.703078	-1.52271	Sensitive
			dasatinib	LN_IC50	C22orf15	3.50819	0.0392796	0.136982	0.0284296	4.8183	Resistant		dasatinib	LN_IC50	ARK73	2.32945	0.0430983	0.182986	-1.27287	1.45586	Resistant
			dasatinib	LN_IC50	RASSF6	-4.26797	0.0150773	0.489721	2.22242	0.220355	Sensitive		dasatinib	LN_IC50	MP2K6	3.71606	0.0023032	0.0392043	-1.3547	1.39391	Resistant
			dasatinib	LN_IC50	SDC2	3.14442	0.047698	6.5646	1.61123	4.07429	Resistant		dasatinib	LN_IC50	ITB4	-3.5644	0.00340623	0.122332	2.43069	-2.30836	Sensitive
			dasatinib	LN_IC50	LINGO1	18.0827	0.00286368	1.07279	0.0519371	20.6556	Resistant		dasatinib	LN_IC50	PTTG	-2.36152	0.0316878	-0.0376859	1.12963	-1.16732	Sensitive
			dasatinib	LN_IC50	OTUD7A	8.62025	0.0131917	0.115382	0.0143553	8.03759	Resistant		dasatinib	LN_IC50	STING	-2.85485	0.0147108	-0.894236	0.695054	-1.58929	Sensitive
			dasatinib	LN_IC50	TMEM154	3.54346	0.0423978	2.27618	1.12735	2.01905	Resistant		dasatinib	LN_IC50	ZEB2	3.0143	0.0117442	-0.157205	-1.68691	1.52971	Resistant
			dasatinib	LN_IC50	FAM153A	-4.80249	0.00950212	0.037322	0.226082	0.165082	Sensitive		dasatinib	LN_IC50	JAG2	-2.99807	0.0171243	0.122105	1.64175	-1.51964	Sensitive
			dasatinib	LN_IC50	HOXD4	-4.97184	0.0381541	0	1.49783	0	Sensitive		dasatinib	LN_IC50	JAG1	-2.28756	0.0461274	-0.540049	0.97828	-1.51833	Sensitive
			dasatinib	LN_IC50	KRT4	-9.70174	0.0103165	0.175525	7.41285	0.0236784	Sensitive		dasatinib	LN_IC50	FA83G	-6.20448	0.000221504	0.202433	1.56708	-1.36465	Sensitive
			dasatinib	LN_IC50	TANC2	3.98497	0.0169467	5.10861	2.41647	2.11408	Resistant		dasatinib	LN_IC50	LAMC1	-3.14605	0.00640073	-0.365061	0.758419	-1.12348	Sensitive
			dasatinib	LN_IC50	TPPP	-1.11663	0.350347	1.40345	3.43259	0.408859	Sensitive		dasatinib	LN_IC50	LAMC2	-3.40466	0.00380803	-0.360244	1.38849	-1.74873	Sensitive
			dasatinib	LN_IC50	KRT27	-5.91495	0.0274125	0	0.106349	0	Sensitive		dasatinib	LN_IC50	GFRA1	3.76221	0.00940538	2.5929	-0.798204	3.3911	Resistant
			dasatinib	LN_IC50	ADRA1D	3.80088	0.0223025	0.119651	0.0284296	4.20867	Resistant		dasatinib	LN_IC50	NSG1	-40.7054	0.0156365	-0.857752	0.924551	-1.7823	Sensitive
			dasatinib	LN_IC50	ZNF556	-3.38889	0.0417105	0.364024	1.70759	0.21318	Sensitive		dasatinib	LN_IC50	GPAT3	-2.68082	0.0165786	-0.326977	1.01535	-1.34233	Sensitive
			dasatinib	LN_IC50	CXCR6	3.01692	0.0465113	0.225764	0.106229	2.12525	Resistant		dasatinib	LN_IC50	WNT5B	13.8557	0.0458669	0.584069	-0.436885	1.02095	Resistant
			dasatinib	LN_IC50	ZMAT3	7.16508	0.00905058	2.45023	1.08982	2.24828	Resistant		dasatinib	LN_IC50	PLXD1	-2.86971	0.0144602	-0.265124	0.983181	-1.24831	Sensitive
			dasatinib	LN_IC50	GXYLT2	3.35031	0.0409115	1.36597	0.328305	4.16068	Resistant		dasatinib	LN_IC50	PLXB1	-2.70467	0.0206014	-0.159476	1.13022	-1.28969	Sensitive
			dasatinib	LN_IC50	DMRT2	4.78996	0.00895479	0.620155	0.168714	3.67577	Resistant		dasatinib	LN_IC50	ADAP1	-2.95221	0.0390403	-0.325023	1.47204	-1.79706	Sensitive
			dasatinib	LN_IC50	SNCG	-5.5229	0.00689671	1.38571	6.51537	0.212683	Sensitive		dasatinib	LN_IC50	JPH2	-2.77361	0.029773	0.143085	2.51192	-2.36884	Sensitive
			dasatinib	LN_IC50	MMRN2	-6.64293	0.00373448	0.96582	3.47661	0.277805	Sensitive		dasatinib	LN_IC50	CA2D1	-4.60324	0.00582317	-0.598458	1.33725	-1.9357	Sensitive
			dasatinib	LN_IC50	GLIPR1L1	-10.2727	0.000506522	0.0472009	0.226403	0.208482	Sensitive		dasatinib	LN_IC50	GRAM3	-2.56134	0.0285209	0.68188	1.76462	-1.08274	Sensitive
			dasatinib	LN_IC50	PEAK1	7.44801	0.0145785	3.70472	1.13263	3.2709	Resistant		dasatinib	LN_IC50	GMPR1	-2.41794	0.0378902	-0.625307	0.683079	-1.30839	Sensitive
			dasatinib	LN_IC50	REP15	-17.6906	0.00308694	0.269832	1.0048	0.268544	Sensitive		dasatinib	LN_IC50	HECW2	4.86249	0.00522783	0.775641	-1.19293	1.96857	Resistant
			dasatinib	LN_IC50	ANKRD36C	3.63254	0.0460739	3.05064	1.4557	2.09566	Resistant		dasatinib	LN_IC50	2023-09-03	3.11032	0.0121198	0.751487	-0.74002	1.49151	Resistant
			dasatinib	LN_IC50	FAM131A	3.60744	0.0486672	3.65525	1.03852	3.51968	Resistant		dasatinib	LN_IC50	REV1	-7.39221	7.67654e-05	-0.248967	0.896538	-1.1455	Sensitive
			dasatinib	LN_IC50	GPX2	-5.08094	0.0361444	0.978381	6.1241	0.159759	Sensitive		dasatinib	LN_IC50	INSR	-4.37654	0.000512061	-0.0843655	1.20782	-1.29218	Sensitive
			dasatinib	LN_IC50	OR4F21	5.02985	0.0373275	0.0238312	0	Inf	Resistant		dasatinib	LN_IC50	PALD	4.67871	0.00538911	-0.113826	-1.70955	1.59573	Resistant
			dasatinib	LN_IC50	KBTBD11	-7.46364	0.00175583	0.220914	1.20779	0.182907	Sensitive		dasatinib	LN_IC50	P63	-2.27367	0.046783	-0.787112	1.05623	-1.84334	Sensitive
			dasatinib	LN_IC50	BASP1	3.92963	0.0176684	6.86141	1.67032	4.10784	Resistant		dasatinib	LN_IC50	UBE2T	3.8304	0.00191664	0.479364	-0.593305	1.07267	Resistant
			dasatinib	LN_IC50	SUMO4	-4.22844	0.0220883	0.123176	0.321563	0.383053	Sensitive		dasatinib	LN_IC50	SCG1	22.0678	0.0002037	0.284025	-5.46762	5.75164	Resistant
			dasatinib	LN_IC50	NAALADL2	4.07381	0.0303956	2.47627	0.857179	2.88886	Resistant		dasatinib	LN_IC50	SGK2	-15.7237	0.000559136	-0.877303	1.531	-2.4083	Sensitive
			dasatinib	LN_IC50	DNAJC22	3.91891	0.0180969	3.6733	1.25496	2.92703	Resistant		dasatinib	LN_IC50	AB17C	-4.19563	0.00852542	-0.641738	0.603988	-1.24573	Sensitive
			dasatinib	LN_IC50	TAF7	2.10437	0.103342	0.352116	0.129391	2.72132	Resistant		dasatinib	LN_IC50	SPB9	-2.61353	0.0324595	-1.0693	1.52066	-2.58996	Sensitive
			dasatinib	LN_IC50	GPBAR1	8.40634	0.00360812	0.246698	0.0794632	3.10456	Resistant		dasatinib	LN_IC50	TRBM	-2.71366	0.024052	-0.76169	1.75561	-2.5173	Sensitive
			dasatinib	LN_IC50	TDRP	-5.07711	0.0351662	0.736154	3.55281	0.207203	Sensitive		dasatinib	LN_IC50	MCP	-2.71785	0.0325189	-0.3942	0.733511	-1.12771	Sensitive
			dasatinib	LN_IC50	TMEM64	4.26061	0.0138889	5.42058	1.48666	3.64615	Resistant		dasatinib	LN_IC50	PHLB2	-3.21713	0.00599427	-0.24492	1.20326	-1.44819	Sensitive
			dasatinib	LN_IC50	LSMEM1	3.53657	0.0342742	0.688875	0.146712	4.69542	Resistant		dasatinib	LN_IC50	PYRG1	3.09783	0.0124715	0.227986	-0.89507	1.12306	Resistant
			dasatinib	LN_IC50	AEN	5.45637	0.00922567	4.97182	1.96075	2.53567	Resistant		dasatinib	LN_IC50	THTPA	5.02541	0.000241801	0.294864	-0.857215	1.15208	Resistant
			dasatinib	LN_IC50	LRRC75A	3.42712	0.0345026	1.42446	0.638239	2.23186	Resistant		dasatinib	LN_IC50	HMGB3	3.22681	0.00564818	0.584149	-0.855002	1.43915	Resistant
			dasatinib	LN_IC50	CFAP65	5.03362	0.0122919	0.0840215	0.0379526	2.21385	Resistant		dasatinib	LN_IC50	PTK7	-4.08331	0.00219348	-0.225017	1.37785	-1.60287	Sensitive
			dasatinib	LN_IC50	PHLDA2	6.80001	0.0151363	5.7947	2.8593	2.02661	Resistant		dasatinib	LN_IC50	BCAM	-3.23549	0.00536972	0.471059	2.10328	-1.63222	Sensitive
			dasatinib	LN_IC50	GRID1	6.91276	0.0202917	0.0565835	0.0238312	2.37435	Resistant		dasatinib	LN_IC50	APOD	2.9019	0.0270819	1.03077	-2.06846	3.09923	Resistant
			dasatinib	LN_IC50	TREX2	4.68074	0.0103423	1.32436	0.557962	2.37356	Resistant		dasatinib	LN_IC50	HTRA1	-2.31523	0.0376967	-0.579095	0.850386	-1.42948	Sensitive
			dasatinib	LN_IC50	RP1L1	-8.19354	0.00383016	0.0745969	0.286784	0.260116	Sensitive		dasatinib	LN_IC50	E41L1	-3.23153	0.00862747	-0.0720913	1.45761	-1.5297	Sensitive
			dasatinib	LN_IC50	SDR42E2	-6.37278	0.00311859	0.0190932	0.0611855	0.312055	Sensitive		dasatinib	LN_IC50	E41L1	-2.41114	0.0337284	0.157526	1.48104	-1.32351	Sensitive
			dasatinib	LN_IC50	PP2D1	3.21383	0.0376847	0.368497	0.127418	2.89204	Resistant		dasatinib	LN_IC50	H7C2K6	-4.30338	0.0126466	-0.759791	1.96655	-2.72634	Sensitive
			dasatinib	LN_IC50	SPATA32	3.57269	0.0345689	0.391261	0.171433	2.2823	Resistant		dasatinib	LN_IC50	MXRA5	-4.71385	0.00159765	-0.705251	1.60966	-2.31491	Sensitive
			dasatinib	LN_IC50	KRBA2	3.49616	0.0264749	1.52492	0.383911	3.97207	Resistant		dasatinib	LN_IC50	P2R3B	7.34262	0.0180474	0.339152	-1.26007	1.59922	Resistant
			dasatinib	LN_IC50	SDR42E1	4.3445	0.0288265	4.12267	1.71336	2.40619	Resistant		dasatinib	LN_IC50	CNT3B	-4.44355	0.0211967	-0.625785	1.88139	-2.50717	Sensitive
			dasatinib	LN_IC50	ADSS1	4.48247	0.0289597	4.13053	1.89164	2.18357	Resistant		dasatinib	LN_IC50	PCGF5	-2.65389	0.0466584	-0.839961	1.07266	-1.91262	Sensitive
			dasatinib	LN_IC50	PRKN	-5.46484	0.0274141	0.0975688	0.328396	0.297107	Sensitive		dasatinib	LN_IC50	RRAS2	-2.37458	0.0347639	0.0151106	1.11752	-1.10241	Sensitive
			dasatinib	LN_IC50	PRKG1	3.14843	0.0431311	1.9512	0.414075	4.71219	Resistant		dasatinib	LN_IC50	RB39B	5.89283	0.00414726	0.0149568	-1.81018	1.82514	Resistant
			dasatinib	LN_IC50	MYBL1	3.15784	0.0429212	5.0282	1.81976	2.76312	Resistant		dasatinib	LN_IC50	RAB6B	3.85754	0.00141386	0.486407	-1.19942	1.68582	Resistant
			dasatinib	LN_IC50	NAT8L	6.92659	0.0200891	1.89485	0.230566	8.21824	Resistant		dasatinib	LN_IC50	ANR44	5.71953	5.35829e-05	0.119268	-1.14132	1.26059	Resistant
			dasatinib	LN_IC50	THNSL1	4.45918	0.0178936	2.77329	0.536704	5.16725	Resistant		dasatinib	LN_IC50	TNR16	2.55507	0.0378228	0.111201	-1.73907	1.85027	Resistant
			dasatinib	LN_IC50	HPDL	4.08672	0.0459948	3.47437	1.3075	2.65726	Resistant		dasatinib	LN_IC50	APLP2	-3.47806	0.00318107	-0.0283639	1.0787	-1.10706	Sensitive
			dasatinib	LN_IC50	PDE2A	9.89926	0.010051	0.428493	0.0703893	6.08748	Resistant		dasatinib	LN_IC50	SNP25	2.22952	0.0476607	-0.270835	-1.2904	1.01956	Resistant
			dasatinib	LN_IC50	FSCN2	4.46507	0.0236394	1.50798	0.355613	4.24049	Resistant		dasatinib	LN_IC50	A6NF51	3.82308	0.0024614	0.397515	-0.827612	1.22513	Resistant
			dasatinib	LN_IC50	LILRB4	-4.52396	0.0202113	0.0047851	0.0518927	0.0922114	Sensitive		dasatinib	LN_IC50	B4DPS5	3.30413	0.00486321	0.223652	-0.894759	1.11841	Resistant
			dasatinib	LN_IC50	KANK3	-3.57814	0.0242651	0.567843	2.29037	0.247927	Sensitive		dasatinib	LN_IC50	VSI10	-8.57782	0.000121837	-0.0806863	1.0818	-1.16249	Sensitive
			dasatinib	LN_IC50	ACTL7A	4.9493	0.00777287	0.0379526	0.0047851	7.93142	Resistant		dasatinib	LN_IC50	TRFM	-2.58553	0.0257879	-0.648445	1.08569	-1.73414	Sensitive
			dasatinib	LN_IC50	SPATA21	3.4144	0.0344119	0.297067	0.101426	2.92891	Resistant		dasatinib	LN_IC50	TUSC3	-4.40566	0.000576669	0.0366333	1.04286	-1.00623	Sensitive
			dasatinib	LN_IC50	GCNT1	-6.40106	0.00542465	1.38588	3.93632	0.352075	Sensitive		dasatinib	LN_IC50	DCAF4	4.39462	0.048076	0.551489	-0.587885	1.13937	Resistant
			dasatinib	LN_IC50	H2AP	7.53407	0.0171651	0.119734	0	Inf	Resistant		dasatinib	LN_IC50	ZFAN6	4.01071	0.00204195	0.135884	-0.950116	1.086	Resistant
			dasatinib	LN_IC50	PLA2G4E	-4.02652	0.0214022	0.0284314	0.132795	0.214099	Sensitive		dasatinib	LN_IC50	TMM51	-3.95551	0.0013589	-0.497834	0.644237	-1.14207	Sensitive
			dasatinib	LN_IC50	FAM25A	-5.84353	0.0129377	0.608242	1.97691	0.307673	Sensitive		dasatinib	LN_IC50	MTAP2	-2.4374	0.03798	-0.314543	0.743739	-1.05828	Sensitive
			dasatinib	LN_IC50	ENO4	-4.91638	0.0281254	0.158171	0.356055	0.44423	Sensitive		dasatinib	LN_IC50	TRPS1	5.02426	0.000124688	2.09155	0.0608386	2.03071	Resistant
			dasatinib	LN_IC50	PAQR9	-6.70458	0.0215304	0.0236463	0.137504	0.171968	Sensitive		dasatinib	LN_IC50	AF1L2	-5.71031	4.04223e-05	-0.924946	1.69721	-2.62216	Sensitive
			dasatinib	LN_IC50	HMX3	-4.39685	0.0132941	0.0471094	0.167465	0.281308	Sensitive		dasatinib	LN_IC50	SH23A	-3.02968	0.0387929	-0.308886	1.39963	-1.70851	Sensitive
			dasatinib	LN_IC50	ZBED6CL	7.58484	0.0132975	3.46846	1.3387	2.59093	Resistant		dasatinib	LN_IC50	ITA6	-4.49671	0.000371329	-0.515344	1.69843	-2.21378	Sensitive
			dasatinib	LN_IC50	BCL2L15	4.3068	0.0478386	0.674648	0.163383	4.12924	Resistant		dasatinib	LN_IC50	H7BZ97	-3.7567	0.00451339	-0.569	1.00495	-1.57395	Sensitive
			dasatinib	LN_IC50	FAM78B	9.84132	0.0101679	0.12864	0.0143553	8.96114	Resistant		dasatinib	LN_IC50	MCF2L	-3.56957	0.0233847	0.106798	2.19465	-2.08785	Sensitive
			dasatinib	LN_IC50	ZNF563	-3.66257	0.0309044	0.890531	2.01129	0.442766	Sensitive		dasatinib	LN_IC50	FKBP4	3.26915	0.00809583	0.528897	-0.530863	1.05976	Resistant
			dasatinib	LN_IC50	HLA.DRB1	6.07768	0.00440879	4.05156	1.13348	3.57445	Resistant		dasatinib	LN_IC50	CBPD	-4.81303	0.000218972	-0.528036	0.654399	-1.18243	Sensitive
			dasatinib	LN_IC50	SERPINA3	8.43294	0.0126844	8.25053	0.290488	28.4023	Resistant		dasatinib	LN_IC50	PTPA	2.77169	0.0163344	0.517331	-0.714718	1.23205	Resistant
			dasatinib	LN_IC50	SULF2	4.2752	0.0229867	7.2196	2.362	3.05657	Resistant		dasatinib	LN_IC50	A6PVN8	2.36882	0.0358227	0.602617	-0.490687	1.0933	Resistant
			dasatinib	LN_IC50	ZNF239	5.4101	0.00735953	3.70744	1.81022	2.04806	Resistant		dasatinib	LN_IC50	SARG	-2.48906	0.0251006	-0.608823	0.994647	-1.60347	Sensitive
			dasatinib	LN_IC50	HCAR1	-3.28194	0.0309302	1.58456	4.53899	0.349101	Sensitive		dasatinib	LN_IC50	MBOA1	-4.17109	0.00664648	0.00529248	1.87442	-1.86913	Sensitive
			dasatinib	LN_IC50	ADAM32	6.02284	0.0213206	1.39897	0.118522	11.8034	Resistant		dasatinib	LN_IC50	HMHA1	-5.33114	8.20009e-05	-0.61175	0.708856	-1.32061	Sensitive
			dasatinib	LN_IC50	NOL4L	3.24091	0.034296	4.41515	1.70831	2.58452	Resistant		dasatinib	LN_IC50	B1AN89	-16.3962	0.0387793	-0.461026	0.585458	-1.04648	Sensitive
			dasatinib	LN_IC50	ADARB1	4.546	0.0424524	4.30653	2.06301	2.0875	Resistant		dasatinib	LN_IC50	DBNL	2.91756	0.0120426	0.20118	-0.899535	1.10072	Resistant
			dasatinib	LN_IC50	CYP2F1	-4.49646	0.04297	0.00957019	0.16696	0.0573204	Sensitive		dasatinib	LN_IC50	CD37L	4.97179	0.000241735	0.434575	-0.699736	1.13431	Resistant
			dasatinib	LN_IC50	ELANE	-4.62763	0.00984197	0.033076	0.14601	0.226533	Sensitive		dasatinib	LN_IC50	IF2B3	-3.06124	0.0078978	-0.943431	0.541363	-1.48479	Sensitive
			dasatinib	LN_IC50	KLHL14	5.02985	0.0373275	0.0238312	0	Inf	Resistant		dasatinib	LN_IC50	IF2B2	-4.0196	0.00136734	-1.08432	0.423475	-1.50779	Sensitive
			dasatinib	LN_IC50	RPE	0.918613	0.455273	0.0964541	0.0143553	6.71906	Resistant		dasatinib	LN_IC50	CASP5	-2.52517	0.0270767	-0.605279	0.539598	-1.14488	Sensitive
			dasatinib	LN_IC50	NPIPB13	4.13042	0.0417229	1.77426	0.76243	2.32711	Resistant		dasatinib	LN_IC50	ACADS	-2.44748	0.0303836	-0.512775	0.573509	-1.08628	Sensitive
			dasatinib	LN_IC50	RPS6KL1	7.00163	0.0197908	3.84271	0.812835	4.72754	Resistant		dasatinib	LN_IC50	AASS	-5.38459	0.00015843	-0.661628	0.718522	-1.38015	Sensitive
			dasatinib	LN_IC50	HLA.DRB5	3.88034	0.0292426	2.77742	0.543717	5.1082	Resistant		dasatinib	LN_IC50	AT2A3	2.59302	0.0269479	1.036	-0.47182	1.50782	Resistant
			dasatinib	LN_IC50	DLL1	-3.71813	0.0287602	1.11265	3.77933	0.294404	Sensitive		dasatinib	LN_IC50	TATD1	5.5678	4.40714e-05	0.386774	-0.647261	1.03403	Resistant
			dasatinib	LN_IC50	BRINP2	12.2156	0.00663482	1.54483	0	Inf	Resistant		dasatinib	LN_IC50	EIF1A	3.92007	0.00129335	0.374659	-0.899578	1.27424	Resistant
			dasatinib	LN_IC50	L1CAM	3.14267	0.0348989	6.25712	2.12871	2.9394	Resistant		dasatinib	LN_IC50	PRD16	-5.16408	0.00136263	-0.729392	0.883601	-1.61299	Sensitive
			dasatinib	LN_IC50	GPRASP1	4.1925	0.0466749	1.30191	0.384775	3.38355	Resistant		dasatinib	LN_IC50	MXRA8	7.15588	0.000828241	1.06543	-4.63419	5.69962	Resistant
			dasatinib	LN_IC50	TCEAL6	4.23526	0.0133249	0.0379526	0.00957019	3.96571	Resistant		dasatinib	LN_IC50	BBS2	13.421	0.00550597	0.119723	-1.42225	1.54198	Resistant
			dasatinib	LN_IC50	MAFB	4.04497	0.0352705	2.61408	0.281884	9.27362	Resistant		dasatinib	LN_IC50	B9EGP5	3.40682	0.00507963	0.461184	-0.616372	1.07756	Resistant
			dasatinib	LN_IC50	VWA7	4.61937	0.0100431	2.86567	0.70445	4.06795	Resistant		dasatinib	LN_IC50	HEBP2	2.67514	0.0212237	0.58773	-0.437903	1.02563	Resistant
			dasatinib	LN_IC50	PRR3	1.61289	0.230778	0.0377713	0.00957019	3.94676	Resistant		dasatinib	LN_IC50	CCD80	-5.04221	0.011408	-0.664925	0.345564	-1.01049	Sensitive
			dasatinib	LN_IC50	RANBP17	4.52021	0.0408844	3.81011	1.83618	2.07503	Resistant		dasatinib	LN_IC50	5NTD	-4.02544	0.0010022	-0.615004	1.11479	-1.72979	Sensitive
			dasatinib	LN_IC50	AARD	7.88875	0.00575844	5.50917	0.386463	14.2554	Resistant		dasatinib	LN_IC50	SE1L3	-2.81335	0.0482098	-1.021	0.693182	-1.71418	Sensitive
			dasatinib	LN_IC50	PKHD1L1	-4.82415	0.0382886	0.0606567	1.22529	0.0495039	Sensitive		dasatinib	LN_IC50	LPIN2	-2.96755	0.0207935	-0.215227	1.23701	-1.45224	Sensitive
			dasatinib	LN_IC50	ZBTB10	3.3967	0.0282734	3.6555	1.41096	2.59078	Resistant		dasatinib	LN_IC50	RTN4	-4.62859	0.00240168	0.13927	1.47463	-1.33536	Sensitive
			dasatinib	LN_IC50	EXOC3L4	-6.66732	0.0084645	0.378301	2.97458	0.127178	Sensitive		dasatinib	LN_IC50	DUS4	10.4537	0.00013813	-0.531486	-2.46042	1.92893	Resistant
			dasatinib	LN_IC50	SERPINB11	-5.05941	0.0369164	0	0.0472454	0	Sensitive		dasatinib	LN_IC50	RNF14	2.65652	0.0219844	0.575062	-0.558389	1.13345	Resistant
			dasatinib	LN_IC50	DIO1	-2.90316	0.0475786	0.0913112	0.277906	0.328569	Sensitive		dasatinib	LN_IC50	DPP8	3.05279	0.0102053	0.27353	-0.7914	1.06493	Resistant
			dasatinib	LN_IC50	CLDN9	4.68812	0.0192552	1.64787	0.405103	4.06777	Resistant		dasatinib	LN_IC50	E2AK1	3.95947	0.00703986	0.589957	-0.456834	1.04679	Resistant
			dasatinib	LN_IC50	COLCA2	-4.24756	0.0181359	0.362035	2.66635	0.135779	Sensitive		dasatinib	LN_IC50	NTAN1	3.22548	0.0104362	0.520553	-0.827737	1.34829	Resistant
			dasatinib	LN_IC50	GNAT3	-8.08926	0.0149405	0	0.0379526	0	Sensitive		dasatinib	LN_IC50	MPRA	-4.39391	0.00706201	-0.552794	1.33227	-1.88506	Sensitive
			dasatinib	LN_IC50	NPIPA8	-6.15209	0.00385343	0.697035	3.64803	0.191072	Sensitive		dasatinib	LN_IC50	YS003	2.51695	0.0399882	0.328172	-1.14342	1.47159	Resistant
			dasatinib	LN_IC50	RSC1A1	3.52435	0.0385422	1.14246	0.237429	4.8118	Resistant		dasatinib	LN_IC50	RAB34	-3.20435	0.0058409	-0.109066	1.11152	-1.22058	Sensitive
			dasatinib	LN_IC50	ATAD3C	-4.67804	0.030207	1.08989	3.04279	0.358187	Sensitive		dasatinib	LN_IC50	LRRC1	-3.11494	0.00688468	0.225839	1.37315	-1.14731	Sensitive
			dasatinib	LN_IC50	TIGD1	4.27209	0.0358278	1.99341	0.969433	2.05627	Resistant		dasatinib	LN_IC50	PLPL4	-2.68078	0.0223211	-0.132996	1.02839	-1.16139	Sensitive
			dasatinib	LN_IC50	KLLN	42.456	1.86252e-06	0.787952	0.337195	2.33678	Resistant		dasatinib	LN_IC50	UD13	-3.94551	0.00310244	-1.28207	0.986013	-2.26808	Sensitive
			dasatinib	LN_IC50	RTL5	6.47963	0.00923546	1.4258	0.29618	4.81398	Resistant		dasatinib	LN_IC50	PTGES	-3.77516	0.00321419	0.255802	3.46427	-3.20846	Sensitive
			dasatinib	LN_IC50	UPK3B	-5.29984	0.00610108	1.45965	4.32985	0.337114	Sensitive		dasatinib	LN_IC50	CYTC	-2.69292	0.0207731	-0.290026	0.892499	-1.18253	Sensitive
			dasatinib	LN_IC50	ECSCR	-8.08926	0.0149405	0	0.0379526	0	Sensitive		dasatinib	LN_IC50	GIPC3	8.10349	0.0148892	0.228718	-2.65679	2.88551	Resistant
			dasatinib	LN_IC50	TAS2R43	4.86955	0.0126576	0.158841	0.0284296	5.58716	Resistant		dasatinib	LN_IC50	PKHA7	-4.13766	0.000782855	-0.256762	1.30453	-1.56129	Sensitive
			dasatinib	LN_IC50	HCAR3	-7.68658	0.00329943	0.185727	1.72045	0.107953	Sensitive		dasatinib	LN_IC50	PDP2	-9.51335	0.00068153	-0.230435	0.98156	-1.21199	Sensitive
			dasatinib	LN_IC50	NEDD8.MDP1	-7.8411	0.0157919	0.356544	1.78099	0.200195	Sensitive		dasatinib	LN_IC50	FSD1	3.30038	0.00593868	0.484725	-0.7968	1.28153	Resistant
			dasatinib	LN_IC50	SPDYE6	5.19029	0.0144545	1.51906	0.671871	2.26094	Resistant		dasatinib	LN_IC50	UB2V2	3.96944	0.00166127	0.225893	-0.87782	1.10371	Resistant
			dasatinib	LN_IC50	CCDC187	-4.78119	0.010579	0.098966	0.633036	0.156335	Sensitive		dasatinib	LN_IC50	GSTP1	-2.6202	0.0186719	-1.19205	0.197902	-1.38995	Sensitive
			dasatinib	LN_IC50	SMIM32	7.81404	0.00203258	0.213873	0.0284314	7.52242	Resistant		dasatinib	LN_IC50	DHB11	-3.77453	0.00304137	-1.73548	0.116996	-1.85248	Sensitive
			dasatinib	LN_IC50	FAM47E.STBD1	6.24327	0.00335504	0.903238	0.167184	5.40266	Resistant		dasatinib	LN_IC50	DPTOR	2.73188	0.0292627	0.102905	-1.45819	1.5611	Resistant
			dasatinib	LN_IC50	RIMBP3B	3.58625	0.0476394	0.39344	0.123836	3.1771	Resistant		dasatinib	LN_IC50	CNTN1	-2.99714	0.0238448	-0.865961	0.651523	-1.51748	Sensitive
			dasatinib	LN_IC50	RIMBP3	2.11966	0.162986	0.224111	0.0142148	15.7661	Resistant		dasatinib	LN_IC50	UNC5C	-13.7634	0.00523754	-0.0124681	4.02391	-4.03637	Sensitive
			dasatinib	LN_IC50	H2AB3	6.08197	0.0241199	0.532549	0.0930533	5.72305	Resistant		dasatinib	LN_IC50	LANC1	4.66254	0.000700938	0.359436	-1.00219	1.36162	Resistant
			dasatinib	LN_IC50	H2AB2	6.08197	0.0241199	0.532549	0.0930533	5.72305	Resistant		dasatinib	LN_IC50	SETD7	6.56012	1.33743e-05	0.647214	-0.914507	1.56172	Resistant
			dasatinib	LN_IC50	ADORA3	3.38566	0.0321064	0.097484	0.0188612	5.1685	Resistant		dasatinib	LN_IC50	NEUT	23.7164	0.0268271	-0.135765	-1.33081	1.19504	Resistant
			dasatinib	LN_IC50	OR4F29	5.02985	0.0373275	0.0238312	0	Inf	Resistant		dasatinib	LN_IC50	GALK1	3.7683	0.00168867	0.496814	-0.734977	1.23179	Resistant
													dasatinib	LN_IC50	CDCA7	3.39493	0.0193574	0.0933547	-1.11378	1.20714	Resistant
													dasatinib	LN_IC50	UBX2B	4.63002	0.0054937	0.033883	-0.984847	1.01873	Resistant
													dasatinib	LN_IC50	PSME2	3.6374	0.00233819	0.455471	-0.618124	1.0736	Resistant
													dasatinib	LN_IC50	PKHG3	-3.94657	0.00121979	-0.423706	0.731676	-1.15538	Sensitive
													dasatinib	LN_IC50	JCAD	-2.85663	0.0145804	-0.484853	0.594327	-1.07918	Sensitive
													dasatinib	LN_IC50	VILL	-19.6015	1.14262e-06	-0.780616	2.53687	-3.31749	Sensitive
													dasatinib	LN_IC50	SCMC3	-5.80074	0.00439263	-0.519664	1.29058	-1.81024	Sensitive
													dasatinib	LN_IC50	DUS1L	3.70947	0.00193602	0.173496	-0.873072	1.04657	Resistant
													dasatinib	LN_IC50	EMIL2	13.9143	9.6303e-06	0.117327	-0.967205	1.08453	Resistant
													dasatinib	LN_IC50	CO4A1	-2.161	0.0462187	-0.756777	1.20463	-1.96141	Sensitive
													dasatinib	LN_IC50	CHM4A	3.46636	0.00531268	0.235135	-0.927326	1.16246	Resistant
													dasatinib	LN_IC50	CGL	-2.43407	0.0384413	-1.06215	0.166234	-1.22838	Sensitive
													dasatinib	LN_IC50	LYSM1	5.55313	0.000105642	0.761141	-1.18446	1.94561	Resistant
													dasatinib	LN_IC50	NAGK	5.29647	7.23762e-05	0.720227	-0.584981	1.30521	Resistant
													dasatinib	LN_IC50	ANXA3	-2.30266	0.0397254	-0.0390555	1.55038	-1.58944	Sensitive
													dasatinib	LN_IC50	FYN	-3.19115	0.00679426	-0.233924	0.78268	-1.0166	Sensitive
													dasatinib	LN_IC50	LYN	-2.73899	0.0145765	-0.646631	0.365137	-1.01177	Sensitive
													dasatinib	LN_IC50	MET	-3.47096	0.00369834	-0.537479	1.10579	-1.64327	Sensitive
													dasatinib	LN_IC50	CDK4	2.2656	0.0379161	0.957919	-0.365253	1.32317	Resistant
													dasatinib	LN_IC50	CDK18	3.04654	0.0367555	0.463546	-0.681697	1.14524	Resistant
													dasatinib	LN_IC50	FGFR2	-38.9891	0.00065718	-0.471628	2.42447	-2.89609	Sensitive
													dasatinib	LN_IC50	IKKB	2.50445	0.0234674	0.621283	-0.433368	1.05465	Resistant
													dasatinib	LN_IC50	CSK	3.42058	0.00426495	0.235219	-0.837335	1.07255	Resistant
													dasatinib	LN_IC50	ZA2G	2.36881	0.0356988	0.843823	-0.533976	1.3778	Resistant
													dasatinib	LN_IC50	SBNO2	4.98949	0.0378998	0.584285	-0.563022	1.14731	Resistant
													dasatinib	LN_IC50	DPEP1	5.62854	0.011092	-0.356508	-1.4095	1.053	Resistant
													dasatinib	LN_IC50	4EBP1	3.03153	0.0124504	-0.129845	-1.50427	1.37442	Resistant
													dasatinib	LN_IC50	PHLA1	-2.95659	0.0159035	-0.622742	1.63789	-2.26063	Sensitive
													dasatinib	LN_IC50	DYH9	3.8343	0.00355414	-0.036488	-1.33511	1.29862	Resistant
													dasatinib	LN_IC50	CLIC5	-2.80696	0.0191996	-1.35217	2.64936	-4.00153	Sensitive
													dasatinib	LN_IC50	GDPP1	3.83907	0.00236665	0.227983	-1.13381	1.36179	Resistant
													dasatinib	LN_IC50	SAHH2	4.05034	0.00179309	0.492648	-0.545123	1.03777	Resistant
													dasatinib	LN_IC50	IL1AP	-2.94787	0.00981499	-0.327475	0.733665	-1.06114	Sensitive
													dasatinib	LN_IC50	ALKB6	3.82116	0.00655954	0.49349	-0.687981	1.18147	Resistant
													dasatinib	LN_IC50	A2ML1	-6.2738	0.0244772	-0.906739	1.03649	-1.94323	Sensitive
													dasatinib	LN_IC50	H2A1B	3.80635	0.0125467	1.14907	-1.09508	2.24415	Resistant
													dasatinib	LN_IC50	KLF4	-4.01762	0.0145483	-1.57611	0.973368	-2.54948	Sensitive
													dasatinib	LN_IC50	PDPK1	3.77923	0.00176148	0.617992	-0.427963	1.04595	Resistant
													dasatinib	LN_IC50	SRBS2	-4.218	0.000705511	-0.552715	1.30728	-1.86	Sensitive
													dasatinib	LN_IC50	INADL	-2.90912	0.0102451	0.15852	1.23545	-1.07693	Sensitive
													dasatinib	LN_IC50	PPBN	-18.3944	0.00294246	-0.160102	5.12689	-5.28699	Sensitive
													dasatinib	LN_IC50	DPP10	-83.0001	0.00766974	-0.0496221	1.19112	-1.24074	Sensitive
													dasatinib	LN_IC50	MP2K1	2.70412	0.0200968	0.0671949	-0.959353	1.02655	Resistant
													dasatinib	LN_IC50	PROSC	3.03291	0.00792954	0.41985	-0.716694	1.13654	Resistant
													dasatinib	LN_IC50	OSTF1	5.30357	7.30961e-05	0.32203	-0.775971	1.098	Resistant
													dasatinib	LN_IC50	TR10A	-5.44387	0.00039227	-0.0399425	1.8504	-1.89034	Sensitive
													dasatinib	LN_IC50	SERA	3.03514	0.00830481	0.220982	-1.06378	1.28476	Resistant
													dasatinib	LN_IC50	HUTI	6.30701	0.0242294	-0.986926	-2.50265	1.51573	Resistant
													dasatinib	LN_IC50	TF	-2.5827	0.0218893	0.148147	3.16278	-3.01463	Sensitive
													dasatinib	LN_IC50	CX057	-41.9709	0.0151653	-0.255116	1.56853	-1.82365	Sensitive
													dasatinib	LN_IC50	HEM6	-3.92435	0.00222362	-0.571597	0.702779	-1.27438	Sensitive
													dasatinib	LN_IC50	K1324	3.15346	0.0160743	2.13831	-0.601695	2.74001	Resistant
													dasatinib	LN_IC50	PCSK9	-2.51099	0.0299411	-0.279	0.862834	-1.14183	Sensitive
													dasatinib	LN_IC50	TSN1	-3.32667	0.027642	0.0495128	2.17403	-2.12452	Sensitive
													dasatinib	LN_IC50	SKIV2	8.31585	1.43389e-06	0.299198	-0.98956	1.28876	Resistant
													dasatinib	LN_IC50	STC2	3.0047	0.00959989	1.24647	-1.49937	2.74584	Resistant
													dasatinib	LN_IC50	G3V145	2.6587	0.037589	0.954377	-1.16723	2.12161	Resistant
													dasatinib	LN_IC50	ST1A1	2.54192	0.034607	0.74042	-1.06068	1.80109	Resistant
													dasatinib	LN_IC50	AK1C3	-3.18428	0.00579643	-0.786239	0.741322	-1.52756	Sensitive
													dasatinib	LN_IC50	AK1C2	-7.05569	0.000883896	-1.27812	0.827523	-2.10564	Sensitive
													dasatinib	LN_IC50	FWCH2	2.29655	0.0366824	0.256878	-0.918863	1.17574	Resistant
													dasatinib	LN_IC50	SPRE1	-2.73484	0.0241828	-0.525918	0.524126	-1.05004	Sensitive
													dasatinib	LN_IC50	CBWD1	3.43499	0.00448736	0.0739806	-1.13034	1.20432	Resistant
													dasatinib	LN_IC50	CBWD2	10.3442	0.00192731	0.330956	-1.46579	1.79675	Resistant
													dasatinib	LN_IC50	SUCHY	-7.35161	0.000731023	0.291753	3.19977	-2.90802	Sensitive
													dasatinib	LN_IC50	TBCD1	2.98518	0.013686	0.574364	-0.588407	1.16277	Resistant
													dasatinib	LN_IC50	AEBP1	-39.3955	0.000643705	-0.210268	1.90373	-2.114	Sensitive
													dasatinib	LN_IC50	FKB11	-3.5438	0.00348622	-1.01155	1.12589	-2.13744	Sensitive
													dasatinib	LN_IC50	CAR11	-2.58496	0.0321065	-1.13622	0.0150309	-1.15125	Sensitive
													dasatinib	LN_IC50	PLBL1	-3.05662	0.0086633	-0.0357153	1.6865	-1.72221	Sensitive
													dasatinib	LN_IC50	FUCO2	-5.40818	6.02678e-05	-0.203828	0.918283	-1.12211	Sensitive
													dasatinib	LN_IC50	ABC3C	-2.84342	0.0129561	-1.76307	-0.468261	-1.29481	Sensitive
													dasatinib	LN_IC50	OSTP	-2.64871	0.0380883	-0.644722	0.642298	-1.28702	Sensitive
													dasatinib	LN_IC50	TENS4	-6.92717	2.54949e-05	-0.446719	1.86789	-2.3146	Sensitive
													dasatinib	LN_IC50	TSN6	-2.13188	0.0489502	-0.0908269	1.1628	-1.25363	Sensitive
													dasatinib	LN_IC50	RN213	2.87923	0.0293487	0.24094	-1.20081	1.44175	Resistant
													dasatinib	LN_IC50	CXAR	-3.80206	0.00347093	-0.269079	1.22338	-1.49246	Sensitive
													dasatinib	LN_IC50	IDHP	2.43485	0.0277271	0.849248	-0.438691	1.28794	Resistant
													dasatinib	LN_IC50	GALT7	-4.82842	0.00027947	-0.0562966	0.977505	-1.0338	Sensitive
													dasatinib	LN_IC50	DHE3	-5.78689	2.94058e-05	-0.408628	0.662696	-1.07132	Sensitive
													dasatinib	LN_IC50	DHE4	4.32041	0.00387556	0.833644	-3.02429	3.85794	Resistant
													dasatinib	LN_IC50	ATG3	3.90116	0.00164802	0.160895	-1.05331	1.21421	Resistant
													dasatinib	LN_IC50	ACBP	3.49141	0.00316319	0.353007	-1.31233	1.66534	Resistant
													dasatinib	LN_IC50	KGP1	18.3397	0.00295994	-0.409207	-1.82104	1.41183	Resistant
													dasatinib	LN_IC50	PHP14	2.58005	0.0206703	0.469883	-0.839219	1.3091	Resistant
													dasatinib	LN_IC50	ENSA	3.33565	0.00536328	0.458599	-0.664358	1.12296	Resistant
													dasatinib	LN_IC50	ATG7	4.19934	0.000832835	0.597206	-0.705104	1.30231	Resistant
													dasatinib	LN_IC50	LAT1	-2.44252	0.0320394	-0.389938	0.729232	-1.11917	Sensitive
													dasatinib	LN_IC50	PTPC1	16.5968	0.0383116	0.0657482	-1.72426	1.79001	Resistant
													dasatinib	LN_IC50	IBP3	-2.63392	0.0194359	-0.101703	1.69633	-1.79804	Sensitive
													dasatinib	LN_IC50	XPOT	2.9759	0.0100357	0.312112	-0.713329	1.02544	Resistant
													dasatinib	LN_IC50	ATS12	-8.60587	0.00100197	-0.184267	1.3196	-1.50387	Sensitive
													dasatinib	LN_IC50	THMS2	-4.03005	0.0065517	-1.10391	0.161404	-1.26532	Sensitive
													dasatinib	LN_IC50	FSD1L	2.6281	0.0351943	-0.446657	-1.97878	1.53213	Resistant
													dasatinib	LN_IC50	B7Z8B3	2.86634	0.0137696	0.190093	-0.905052	1.09515	Resistant
													dasatinib	LN_IC50	PEX19	3.85262	0.00142197	0.17392	-0.863686	1.03761	Resistant
													dasatinib	LN_IC50	CTC1	-5.39146	0.032723	-0.234903	0.808178	-1.04308	Sensitive
													dasatinib	LN_IC50	ESAM	-3.79362	0.00731411	-0.50228	1.05048	-1.55276	Sensitive
													dasatinib	LN_IC50	PDE3A	-28.5628	0.00122349	-0.907354	1.60797	-2.51532	Sensitive
													dasatinib	LN_IC50	SIAS	3.16933	0.00653957	0.450028	-0.653235	1.10326	Resistant
													dasatinib	LN_IC50	ELL2	-4.70656	0.00219165	0.111165	1.29961	-1.18844	Sensitive
													dasatinib	LN_IC50	FA96A	3.41656	0.00362502	0.308511	-0.721168	1.02968	Resistant
													dasatinib	LN_IC50	MUC16	-2.93212	0.0222476	-0.235271	2.66887	-2.90414	Sensitive
													dasatinib	LN_IC50	B4E1Z4	-2.61979	0.0256591	0.415811	1.74011	-1.3243	Sensitive
													dasatinib	LN_IC50	GPD1L	2.39787	0.0376245	0.587104	-0.516462	1.10357	Resistant
													dasatinib	LN_IC50	GFRP	2.64126	0.0338963	-0.283321	-2.75615	2.47283	Resistant
													dasatinib	LN_IC50	APEX1	2.69483	0.0213853	0.225474	-0.783801	1.00927	Resistant
													dasatinib	LN_IC50	DCXR	2.37517	0.0310256	0.509003	-0.539437	1.04844	Resistant
													dasatinib	LN_IC50	RABP1	3.10685	0.0105908	1.56993	-1.02033	2.59026	Resistant
													dasatinib	LN_IC50	RABP2	2.92396	0.0103965	1.5604	-0.708601	2.269	Resistant
													dasatinib	LN_IC50	RN149	-3.51742	0.00287115	-0.345303	0.661149	-1.00645	Sensitive
													dasatinib	LN_IC50	CYTS	-10.1944	0.00201159	-1.26312	6.84141	-8.10453	Sensitive
													dasatinib	LN_IC50	RFIP5	-2.51908	0.0263452	-0.226658	0.889467	-1.11613	Sensitive
													dasatinib	LN_IC50	ITPA	4.90857	0.000161998	-0.0715577	-1.38054	1.30898	Resistant
													dasatinib	LN_IC50	KDM8	2.85229	0.041373	0.59172	-0.440858	1.03258	Resistant
													dasatinib	LN_IC50	PDP1	-2.85546	0.0121433	-0.268235	0.795672	-1.06391	Sensitive
													dasatinib	LN_IC50	BASI	-3.03769	0.010016	-0.604086	0.455965	-1.06005	Sensitive
													dasatinib	LN_IC50	SCRN3	2.98245	0.0129256	0.0484501	-0.989695	1.03815	Resistant
													dasatinib	LN_IC50	SEM3C	3.40301	0.00610162	1.38653	0.260291	1.12624	Resistant
													dasatinib	LN_IC50	SKI	-3.11582	0.0164109	-0.487535	0.71681	-1.20435	Sensitive
													dasatinib	LN_IC50	PLCB4	4.2944	0.00190663	0.653237	-1.1658	1.81904	Resistant
													dasatinib	LN_IC50	TEAD1	-4.07464	0.00121263	-0.513423	0.632604	-1.14603	Sensitive
													dasatinib	LN_IC50	DGKE	3.45344	0.0104698	0.440075	-0.812091	1.25217	Resistant
													dasatinib	LN_IC50	GPX7	-3.57158	0.00549435	-0.82722	2.40686	-3.23408	Sensitive
													dasatinib	LN_IC50	CNKR1	-3.85949	0.0307433	0.0318621	2.27439	-2.24253	Sensitive
													dasatinib	LN_IC50	IBP5	3.82239	0.00503116	1.58338	-0.701618	2.285	Resistant
													dasatinib	LN_IC50	AASD1	3.76663	0.00455961	0.215569	-1.24157	1.45714	Resistant
													dasatinib	LN_IC50	GRAN	3.71654	0.00221849	0.795038	-0.473787	1.26883	Resistant
													dasatinib	LN_IC50	IKBA	3.28153	0.0392076	0.538674	-0.673758	1.21243	Resistant
													dasatinib	LN_IC50	ENDD1	-3.16042	0.00606121	-0.260013	0.750172	-1.01019	Sensitive
													dasatinib	LN_IC50	KIME	2.75402	0.0141192	0.499029	-0.514008	1.01304	Resistant
													dasatinib	LN_IC50	APC2	-6.67868	9.08909e-05	-0.3792	0.718013	-1.09721	Sensitive
													dasatinib	LN_IC50	PROF2	3.29964	0.00459932	0.340195	-1.18241	1.5226	Resistant
													dasatinib	LN_IC50	IMPA2	2.31136	0.0398701	0.675541	-0.385549	1.06109	Resistant
													dasatinib	LN_IC50	SH3G2	-5.05463	0.00391785	0.19771	3.64699	-3.44928	Sensitive
													dasatinib	LN_IC50	STOM	2.44528	0.0291263	0.249081	-0.797218	1.0463	Resistant
													dasatinib	LN_IC50	CAV1	-2.53527	0.0232481	-0.369317	1.46947	-1.83879	Sensitive
													dasatinib	LN_IC50	PTPRG	-2.72274	0.015062	-0.612445	0.978539	-1.59098	Sensitive
													dasatinib	LN_IC50	CGT	-3.29716	0.00824348	-0.697868	0.941691	-1.63956	Sensitive
													dasatinib	LN_IC50	PBDC1	2.57739	0.0202511	0.0326015	-0.967485	1.00009	Resistant
													dasatinib	LN_IC50	FBX9	6.96378	0.000238247	0.976727	-0.307577	1.2843	Resistant
													dasatinib	LN_IC50	LSR	-2.49816	0.0237644	0.478709	1.52299	-1.04428	Sensitive
													dasatinib	LN_IC50	RN146	2.50634	0.0276296	0.55363	-0.637078	1.19071	Resistant
													dasatinib	LN_IC50	RBMS2	-2.97767	0.00962321	-0.288809	0.71928	-1.00809	Sensitive
													dasatinib	LN_IC50	FAN	2.71014	0.0180032	0.175292	-0.836959	1.01225	Resistant
													dasatinib	LN_IC50	SNX25	-5.91217	0.00409789	-0.465605	0.614511	-1.08012	Sensitive
													dasatinib	LN_IC50	ZN639	-3.68123	0.0347276	-0.43521	1.00336	-1.43857	Sensitive
													dasatinib	LN_IC50	SCEL	-3.9062	0.0077599	-1.23076	1.89918	-3.12994	Sensitive
													dasatinib	LN_IC50	SCEL	-8.84178	8.10492e-05	-1.78423	2.84967	-4.6339	Sensitive
													dasatinib	LN_IC50	SIM13	-4.98485	0.0069539	-0.541099	1.60515	-2.14624	Sensitive
													dasatinib	LN_IC50	ES8L2	-2.41676	0.0286692	0.264735	1.56308	-1.29834	Sensitive
													dasatinib	LN_IC50	IBP6	-2.56873	0.0358349	-0.321195	2.38589	-2.70708	Sensitive
													dasatinib	LN_IC50	DCLK2	3.33521	0.044546	1.17303	-1.00632	2.17935	Resistant
													dasatinib	LN_IC50	HEG1	-3.28512	0.00727967	-0.325774	1.21664	-1.54241	Sensitive
													dasatinib	LN_IC50	PREX1	2.73807	0.0186822	0.877086	-0.729151	1.60624	Resistant
													dasatinib	LN_IC50	AOFA	-3.66733	0.00213482	-0.832231	0.843747	-1.67598	Sensitive
													dasatinib	LN_IC50	ID1	-3.25869	0.00724898	-0.708729	0.650199	-1.35893	Sensitive
													dasatinib	LN_IC50	ROR1	-2.80988	0.0258285	-0.846025	1.6293	-2.47532	Sensitive
													dasatinib	LN_IC50	TM238	-4.50046	0.00639682	0.160666	2.01476	-1.85409	Sensitive
													dasatinib	LN_IC50	DC1I1	2.64537	0.0491493	0.357656	-0.729302	1.08696	Resistant
													dasatinib	LN_IC50	SRPX	2.58352	0.0463997	0.405994	-1.01238	1.41838	Resistant
													dasatinib	LN_IC50	SPTB2	-3.84557	0.00194964	-0.480191	0.748199	-1.22839	Sensitive
													dasatinib	LN_IC50	SPTB2	-6.57488	0.000130357	-0.622599	1.78465	-2.40725	Sensitive
													dasatinib	LN_IC50	H0Y2S9	-3.42508	0.00424516	-0.160272	1.13011	-1.29038	Sensitive
													dasatinib	LN_IC50	MPRIP	-4.58175	0.000376175	-0.304852	1.11132	-1.41617	Sensitive
													dasatinib	LN_IC50	TRY2	-12.1022	0.00675851	-0.657773	2.90924	-3.56701	Sensitive
													dasatinib	LN_IC50	TRY3	-18.5596	0.00289054	-0.855388	3.94761	-4.803	Sensitive
													dasatinib	LN_IC50	ST2B1	2.88063	0.0280346	1.68676	-0.561034	2.24779	Resistant
													dasatinib	LN_IC50	RHG09	5.54125	0.00545938	-0.515614	-1.79273	1.27711	Resistant
													dasatinib	LN_IC50	GP110	-5.15702	0.0061779	-1.33929	2.73447	-4.07376	Sensitive
													dasatinib	LN_IC50	NUDC2	2.18506	0.0479678	0.302648	-0.699815	1.00246	Resistant
													dasatinib	LN_IC50	CENPV	-2.93323	0.0104548	-0.555617	0.982217	-1.53783	Sensitive
													dasatinib	LN_IC50	CENPV	-2.79751	0.0461458	-0.612363	1.93196	-2.54432	Sensitive
													dasatinib	LN_IC50	TCHP	-3.32253	0.0311356	-0.32654	1.06761	-1.39415	Sensitive
													dasatinib	LN_IC50	EPHA1	-14.3765	1.8758e-06	0.0444804	2.36621	-2.32173	Sensitive
													dasatinib	LN_IC50	HSPB1	2.48304	0.0252711	0.830187	-0.535253	1.36544	Resistant
													dasatinib	LN_IC50	CCYL1	-3.40351	0.00378623	-0.315091	0.695051	-1.01014	Sensitive
													dasatinib	LN_IC50	NUD22	4.37192	0.00543371	0.792742	-0.560079	1.35282	Resistant
													dasatinib	LN_IC50	GLU2B	-2.73904	0.021243	-0.44019	0.730777	-1.17097	Sensitive
													dasatinib	LN_IC50	RIR1	2.69813	0.0173699	0.511296	-0.516773	1.02807	Resistant
													dasatinib	LN_IC50	MORC4	-7.5247	0.0172067	-1.25712	2.28295	-3.54007	Sensitive
													dasatinib	LN_IC50	PTN7	5.27253	0.0165116	-0.815429	-2.70396	1.88853	Resistant
													dasatinib	LN_IC50	CFAH	-2.66199	0.0244408	-1.19741	0.0207435	-1.21815	Sensitive
													dasatinib	LN_IC50	Q5LJA9	3.72797	0.0086711	0.154463	-0.958266	1.11273	Resistant
													dasatinib	LN_IC50	CA172	-4.77941	0.00201365	0.216423	3.45076	-3.23434	Sensitive
													dasatinib	LN_IC50	ISOC1	3.01693	0.0089187	0.775752	-0.619163	1.39491	Resistant
													dasatinib	LN_IC50	MEF2C	-8.95911	0.0122305	-1.04782	0.886762	-1.93459	Sensitive
													dasatinib	LN_IC50	CB39L	2.63231	0.0382387	0.905752	-0.88923	1.79498	Resistant
													dasatinib	LN_IC50	LOXL1	15.9831	0.0173469	0.266846	-0.802164	1.06901	Resistant
													dasatinib	LN_IC50	ARHG8	-7.4582	0.000683785	0.159029	1.6997	-1.54067	Sensitive
													dasatinib	LN_IC50	CRIP2	2.84829	0.0139626	1.0603	-0.631703	1.692	Resistant
													dasatinib	LN_IC50	NCAM2	2.65837	0.0441379	3.11265	0.31767	2.79498	Resistant
													dasatinib	LN_IC50	IBP2	2.99339	0.0114893	0.500098	-0.987319	1.48742	Resistant
													dasatinib	LN_IC50	BACH1	-5.38243	0.000118027	-0.539577	0.540552	-1.08013	Sensitive
													dasatinib	LN_IC50	CTDSL	-10.4949	4.43059e-06	0.162957	1.48251	-1.31955	Sensitive
													dasatinib	LN_IC50	CHSP1	4.31735	0.000531846	0.304629	-0.855201	1.15983	Resistant
													dasatinib	LN_IC50	E9PIR9	-5.00695	0.00745373	-0.66394	1.02945	-1.69339	Sensitive
													dasatinib	LN_IC50	NR1H2	-4.88177	0.00232178	-0.270005	1.17808	-1.44808	Sensitive
													dasatinib	LN_IC50	PSD10	2.62268	0.0187473	0.209535	-0.793793	1.00333	Resistant
													dasatinib	LN_IC50	MBP	-3.1572	0.00683769	-0.565199	1.20194	-1.76713	Sensitive
													dasatinib	LN_IC50	DCTN2	4.42745	0.000422488	0.477167	-0.539957	1.01712	Resistant
													dasatinib	LN_IC50	RTN4R	-2.79103	0.0268337	0.0283287	1.38825	-1.35992	Sensitive
													dasatinib	LN_IC50	FST	-4.93159	0.0078639	0.328357	2.49718	-2.16882	Sensitive
													dasatinib	LN_IC50	PHKG2	4.82964	0.000306391	0.849121	-0.42266	1.27178	Resistant
													dasatinib	LN_IC50	STON2	-3.29172	0.0155733	-0.496296	1.09334	-1.58964	Sensitive
													dasatinib	LN_IC50	ELMO3	4.24327	0.0022152	0.503801	-0.951614	1.45541	Resistant
													dasatinib	LN_IC50	CP24A	-5.16535	0.00667334	-1.00512	-0.00302002	-1.0021	Sensitive
													dasatinib	LN_IC50	FABP6	-3.31638	0.00811332	-1.31959	0.229015	-1.54861	Sensitive
													dasatinib	LN_IC50	NUCKS	2.63185	0.0182614	0.215758	-1.10268	1.31844	Resistant
													dasatinib	LN_IC50	HDHD2	2.87458	0.016439	0.0644899	-1.30385	1.36834	Resistant
													dasatinib	LN_IC50	APOH	-3.82328	0.00174596	-0.737907	0.96924	-1.70715	Sensitive
													dasatinib	LN_IC50	PDE1C	3.38938	0.0193327	1.72157	-0.977392	2.69896	Resistant
													dasatinib	LN_IC50	MANEA	4.98333	0.00159497	0.0253716	-1.6148	1.64017	Resistant
													dasatinib	LN_IC50	PYRD2	-5.34203	0.00121037	-0.456149	3.15091	-3.60706	Sensitive
													dasatinib	LN_IC50	NOVA1	2.48642	0.0291877	0.303292	-0.716647	1.01994	Resistant
													dasatinib	LN_IC50	MALD2	-4.14052	0.00420786	0.208264	1.70208	-1.49381	Sensitive
													dasatinib	LN_IC50	PUSL1	-2.95927	0.0162491	-0.475511	0.747042	-1.22255	Sensitive
													dasatinib	LN_IC50	DEST	2.90222	0.0117167	0.764471	-0.371402	1.13587	Resistant
													dasatinib	LN_IC50	COF1	4.1187	0.00101414	0.508047	-0.71837	1.22642	Resistant
													dasatinib	LN_IC50	JAM1	-2.25249	0.0397378	0.253835	1.42455	-1.17072	Sensitive
													dasatinib	LN_IC50	K0753	-4.2057	0.00600719	-0.266076	0.993791	-1.25987	Sensitive
													dasatinib	LN_IC50	GUAD	-3.12478	0.0147006	-1.27247	0.302124	-1.5746	Sensitive
													dasatinib	LN_IC50	FAHD1	6.22474	0.00835911	0.462571	-1.01635	1.47892	Resistant
													dasatinib	LN_IC50	SLD5	3.09573	0.00863263	0.263957	-0.90114	1.1651	Resistant
													dasatinib	LN_IC50	CYGB	-9.18514	0.000256593	-0.707461	0.757143	-1.4646	Sensitive
													dasatinib	LN_IC50	PCAT2	-2.2574	0.0429407	-0.180714	0.957209	-1.13792	Sensitive
													dasatinib	LN_IC50	CAH8	2.63234	0.0198128	0.422217	-0.949775	1.37199	Resistant
													dasatinib	LN_IC50	PVRL3	-3.17841	0.0119737	-0.474077	0.843148	-1.31723	Sensitive
													dasatinib	LN_IC50	AAED1	-6.90979	0.00621244	0.217546	1.80528	-1.58773	Sensitive
													dasatinib	LN_IC50	ANKH	-2.39255	0.0387552	-1.05807	0.432283	-1.49035	Sensitive
													dasatinib	LN_IC50	TNR3	-2.99851	0.00922592	-0.0449949	1.37657	-1.42156	Sensitive
													dasatinib	LN_IC50	F105A	-2.41295	0.0352442	-0.10631	0.941006	-1.04732	Sensitive
													dasatinib	LN_IC50	P55G	-6.75058	3.78656e-05	0.158163	1.63247	-1.47431	Sensitive
													dasatinib	LN_IC50	KLDC4	4.85917	0.000359124	0.653702	-0.714212	1.36791	Resistant
													dasatinib	LN_IC50	ABRAL	3.13454	0.0135667	0.569243	-1.04342	1.61266	Resistant
													dasatinib	LN_IC50	ODC	3.28635	0.0212151	0.506431	-1.08233	1.58876	Resistant
													dasatinib	LN_IC50	LYRM9	7.15078	0.019001	0.305894	-3.10733	3.41322	Resistant
													dasatinib	LN_IC50	CCD84	-3.68513	0.0195894	-0.387229	0.788742	-1.17597	Sensitive
													dasatinib	LN_IC50	E9PDY6	-10.1894	0.00201452	-0.898717	2.87025	-3.76897	Sensitive
													dasatinib	LN_IC50	ELOV7	-2.97189	0.0342525	0.0707043	1.20741	-1.1367	Sensitive
													dasatinib	LN_IC50	KLK5	-6.97006	0.00606009	0.538794	6.25549	-5.7167	Sensitive
													dasatinib	LN_IC50	GDAP1	2.98532	0.00874432	0.230357	-0.788811	1.01917	Resistant
													dasatinib	LN_IC50	DAF	-5.37701	6.74476e-05	-0.123537	1.51263	-1.63616	Sensitive
													dasatinib	LN_IC50	DPH6	3.55934	0.00397984	0.374895	-0.762096	1.13699	Resistant
													dasatinib	LN_IC50	AP3S2	2.81726	0.0256814	0.219439	-1.16069	1.38012	Resistant
													dasatinib	LN_IC50	CC106	3.44649	0.0143294	0.635431	-1.26488	1.90031	Resistant
													dasatinib	LN_IC50	EPCR	-3.08731	0.00788583	-0.640413	0.381708	-1.02212	Sensitive
													dasatinib	LN_IC50	PAIP2	4.92397	0.000248951	0.519906	-0.682388	1.20229	Resistant
													dasatinib	LN_IC50	PHF13	4.64134	0.0434199	0.432197	-1.81776	2.24996	Resistant
													dasatinib	LN_IC50	CAV2	-2.91696	0.0110647	-0.295806	1.99303	-2.28884	Sensitive
													dasatinib	LN_IC50	PERP	-5.20569	0.0067851	-1.41596	1.16298	-2.57893	Sensitive
													dasatinib	LN_IC50	XDH	-15.0787	0.0421581	-0.405131	2.66491	-3.07004	Sensitive
													dasatinib	LN_IC50	MTMR6	3.14593	0.0103958	0.333555	-0.699733	1.03329	Resistant
													dasatinib	LN_IC50	CC138	-3.5237	0.01465	-0.879862	0.681942	-1.5618	Sensitive
													dasatinib	LN_IC50	UBP53	4.48157	0.0109766	1.83512	0.451249	1.38387	Resistant
													dasatinib	LN_IC50	PI42C	4.01497	0.00175353	1.10592	-0.165698	1.27162	Resistant
													dasatinib	LN_IC50	MDM2	3.31677	0.0115814	0.356246	-1.72139	2.07763	Resistant
													dasatinib	LN_IC50	TNR5	-3.3817	0.0038095	-1.40264	0.690681	-2.09332	Sensitive
													dasatinib	LN_IC50	EAA4	-7.41679	0.0176978	-0.79716	2.73479	-3.53195	Sensitive
													dasatinib	LN_IC50	FOLR1	-3.97065	0.00147996	0.0790382	3.45274	-3.3737	Sensitive
													dasatinib	LN_IC50	TRI58	86.9407	0.00732214	3.15608	-0.257516	3.4136	Resistant
													dasatinib	LN_IC50	SPY4	-2.92794	0.0116662	-1.24454	0.193178	-1.43771	Sensitive
													dasatinib	LN_IC50	TNR19	6.13811	0.0255298	0.000832167	-2.77843	2.77926	Resistant
													dasatinib	LN_IC50	TLR3	-3.87074	0.00289554	-0.812102	1.83782	-2.64992	Sensitive
													dasatinib	LN_IC50	CC50B	-3.11614	0.0148484	0.383451	2.16483	-1.78138	Sensitive
													dasatinib	LN_IC50	BLVRB	2.88715	0.0109534	0.655769	-0.661304	1.31707	Resistant
													dasatinib	LN_IC50	CP2S1	-3.61238	0.00308503	-0.686086	0.967386	-1.65347	Sensitive
													dasatinib	LN_IC50	TTC37	6.63193	8.35306e-06	0.340399	-1.02662	1.36701	Resistant
													dasatinib	LN_IC50	IFIH1	3.47222	0.0046938	0.853729	-0.608953	1.46268	Resistant
													dasatinib	LN_IC50	TGFR2	-3.61987	0.00481452	-0.732129	0.535935	-1.26806	Sensitive
													dasatinib	LN_IC50	AN32A	2.75003	0.0221349	-0.220618	-1.25815	1.03753	Resistant
													dasatinib	LN_IC50	POLI	14.4228	0.00477291	0.254922	-0.935093	1.19001	Resistant
													dasatinib	LN_IC50	HG2A	-3.07827	0.00729798	-0.93648	0.592823	-1.5293	Sensitive
													dasatinib	LN_IC50	FBLN7	-13.7327	0.0462761	-0.563869	0.489567	-1.05344	Sensitive
													dasatinib	LN_IC50	BT3A3	-4.41053	0.000604429	-0.254648	1.28637	-1.54102	Sensitive
													dasatinib	LN_IC50	BT3A2	-2.95892	0.0287426	-0.281005	1.56272	-1.84372	Sensitive
													dasatinib	LN_IC50	AREG	-6.49143	0.00290418	-0.592354	1.44542	-2.03777	Sensitive
													dasatinib	LN_IC50	DOLK	-3.24977	0.0136111	0.0375508	1.11625	-1.0787	Sensitive
													dasatinib	LN_IC50	LMCD1	3.27764	0.00473739	0.86776	-0.750932	1.61869	Resistant
													dasatinib	LN_IC50	B7Z2R4	-3.98026	0.00172335	-0.300892	0.706525	-1.00742	Sensitive
													dasatinib	LN_IC50	VSIG2	-44.3402	0.000508245	-0.481751	5.22144	-5.70319	Sensitive
													dasatinib	LN_IC50	ITA9	4.68195	0.0427173	-0.341448	-1.3645	1.02305	Resistant
													dasatinib	LN_IC50	J3KT72	2.62068	0.0412305	0.137557	-0.951503	1.08906	Resistant
													dasatinib	LN_IC50	CLD6	4.10887	0.00927409	0.581106	-1.84913	2.43024	Resistant
													dasatinib	LN_IC50	SPEB	-3.4637	0.003345	-0.836774	0.328445	-1.16522	Sensitive
													dasatinib	LN_IC50	GLPC	2.9742	0.0310065	-0.428486	-1.98434	1.55585	Resistant
													dasatinib	LN_IC50	CU059	4.04444	0.00132894	-0.00724559	-1.09513	1.08788	Resistant
													dasatinib	LN_IC50	CLDN1	-3.03354	0.0184074	-0.107394	0.996283	-1.10368	Sensitive
													dasatinib	LN_IC50	VTCN1	6.82774	0.00102789	3.33842	-0.519181	3.8576	Resistant
													dasatinib	LN_IC50	TBC30	3.23684	0.0230299	1.00042	-0.822531	1.82295	Resistant
													dasatinib	LN_IC50	MCM9	-5.92826	0.0272945	-0.0526696	1.173	-1.22567	Sensitive
													dasatinib	LN_IC50	RIMB1	7.36597	0.00427957	0.933112	-0.594907	1.52802	Resistant
													dasatinib	LN_IC50	FOSL2	-2.46551	0.034375	-0.294318	0.788352	-1.08267	Sensitive
													dasatinib	LN_IC50	ARL6	6.01639	1.95911e-05	0.211289	-0.90521	1.1165	Resistant
													dasatinib	LN_IC50	RNLS	-6.01944	0.000316472	-0.176995	2.11653	-2.29352	Sensitive
													dasatinib	LN_IC50	TCP4	3.39238	0.00372051	0.206063	-0.805342	1.0114	Resistant
													dasatinib	LN_IC50	CYLD	2.37993	0.0367523	0.390062	-0.657851	1.04791	Resistant
													dasatinib	LN_IC50	GGPPS	3.98145	0.00107655	0.618362	-0.76943	1.38779	Resistant
													dasatinib	LN_IC50	TINAL	-4.53432	0.000640361	-0.580499	0.901919	-1.48242	Sensitive
													dasatinib	LN_IC50	TFPI2	-2.64075	0.0413578	-0.0563106	1.63152	-1.68783	Sensitive
													dasatinib	LN_IC50	PARVG	18.0776	0.03518	-0.612913	-1.81815	1.20523	Resistant
													dasatinib	LN_IC50	PANX2	-3.58219	0.00894999	0.0277113	1.83732	-1.80961	Sensitive
													dasatinib	LN_IC50	CHUR	2.84125	0.0210734	0.168299	-1.1221	1.2904	Resistant
													dasatinib	LN_IC50	FUCO	-4.84601	0.000179005	-0.607038	1.15223	-1.75927	Sensitive
													dasatinib	LN_IC50	KDEL2	-3.93097	0.00157929	-0.606436	0.67278	-1.27922	Sensitive
													dasatinib	LN_IC50	A7L3B	2.51175	0.0298098	0.416888	-1.18127	1.59816	Resistant
													dasatinib	LN_IC50	RIPK3	-3.79778	0.015091	-0.786732	1.0447	-1.83144	Sensitive
													dasatinib	LN_IC50	FGFP1	-3.68336	0.0211415	-0.0692065	3.32254	-3.39175	Sensitive
													dasatinib	LN_IC50	FA10	5.92741	0.027302	-0.34004	-1.72982	1.38978	Resistant
													dasatinib	LN_IC50	LEG1	2.16096	0.0466152	0.777226	-0.526886	1.30411	Resistant
													dasatinib	LN_IC50	PNPO	2.8152	0.0129322	0.179759	-0.856661	1.03642	Resistant
													dasatinib	LN_IC50	CANB2	2.86215	0.0242042	0.422221	-0.831654	1.25387	Resistant
													dasatinib	LN_IC50	CD151	-2.64795	0.0255312	-0.121553	0.945658	-1.06721	Sensitive
													dasatinib	LN_IC50	CASP9	5.4748	0.00277033	-0.151318	-1.15387	1.00255	Resistant
													dasatinib	LN_IC50	PORCN	-4.34367	0.000902315	-0.60783	0.816169	-1.424	Sensitive
													dasatinib	LN_IC50	RNF6	-3.4157	0.0196854	-0.659069	0.972868	-1.63194	Sensitive
													dasatinib	LN_IC50	PEA15	3.04926	0.00770992	0.216558	-1.00563	1.22219	Resistant
													dasatinib	LN_IC50	SOSB2	-5.97459	0.0268897	-1.3956	0.562558	-1.95816	Sensitive
													dasatinib	LN_IC50	EPHX4	-2.31997	0.0408792	-0.234594	1.3939	-1.62849	Sensitive
													dasatinib	LN_IC50	CCD92	-3.69975	0.0342839	0.202849	1.71202	-1.50917	Sensitive
													dasatinib	LN_IC50	SMAP2	4.22429	0.000653832	0.209902	-0.846539	1.05644	Resistant
													dasatinib	LN_IC50	BOLA2	3.21874	0.00628689	0.353898	-1.05127	1.40517	Resistant
													dasatinib	LN_IC50	GDIA	2.9534	0.0121548	0.553906	-0.499204	1.05311	Resistant
													dasatinib	LN_IC50	GAS2	20.85	0.00229242	-0.631333	-8.00898	7.37765	Resistant
													dasatinib	LN_IC50	ELF4	-5.0577	0.00390762	-0.167169	0.914446	-1.08161	Sensitive
													dasatinib	LN_IC50	F118A	2.62837	0.0274329	-0.00364244	-1.13468	1.13104	Resistant
													dasatinib	LN_IC50	FBX4	2.58332	0.0242849	0.163784	-0.867158	1.03094	Resistant
													dasatinib	LN_IC50	TPC6A	3.43315	0.0071412	0.196276	-0.885953	1.08223	Resistant
													dasatinib	LN_IC50	F134B	20.2107	0.00243919	0.854083	-2.33732	3.1914	Resistant
													dasatinib	LN_IC50	CN142	3.43714	0.0132986	-0.0368077	-1.10399	1.06718	Resistant
													dasatinib	LN_IC50	KTU	4.03981	0.00163112	0.237435	-0.764609	1.00204	Resistant
													dasatinib	LN_IC50	ARY1	2.38589	0.0362711	0.869768	-0.514978	1.38475	Resistant
													dasatinib	LN_IC50	UBE2C	3.7232	0.00284295	0.76306	-0.494207	1.25727	Resistant
													dasatinib	LN_IC50	RET4	-3.17045	0.0301575	-0.444881	0.685447	-1.13033	Sensitive
													dasatinib	LN_IC50	CATS	-3.17335	0.00835003	-0.745247	0.643895	-1.38914	Sensitive
													dasatinib	LN_IC50	CO7A1	-2.93334	0.0115166	-0.645146	0.827019	-1.47217	Sensitive
													dasatinib	LN_IC50	SYUG	-2.87019	0.0130012	-0.11874	2.00788	-2.12662	Sensitive
													dasatinib	LN_IC50	MPI	2.28952	0.0402488	0.221191	-0.879709	1.1009	Resistant
													dasatinib	LN_IC50	E9PEJ6	-4.46726	0.00150826	-0.243627	1.01706	-1.26069	Sensitive
													dasatinib	LN_IC50	AT8A1	-2.62146	0.0338366	-0.572233	1.05632	-1.62855	Sensitive
													dasatinib	LN_IC50	TCAL5	2.8493	0.012187	1.50389	-0.185502	1.6894	Resistant
													dasatinib	LN_IC50	POMT1	3.33616	0.0334365	0.539014	-0.910675	1.44969	Resistant
													dasatinib	LN_IC50	PEDF	-10.684	3.96705e-05	-0.739628	0.454657	-1.19429	Sensitive
													dasatinib	LN_IC50	JOS1	-2.88358	0.0408628	-0.122693	0.958186	-1.08088	Sensitive
													dasatinib	LN_IC50	CNDP2	2.25613	0.0444742	0.330584	-0.768109	1.09869	Resistant
													dasatinib	LN_IC50	PTN3	-7.54888	2.86181e-05	-0.0263205	1.93126	-1.95758	Sensitive
													dasatinib	LN_IC50	FCGRN	-3.03517	0.0092139	-0.9172	1.58957	-2.50677	Sensitive
													dasatinib	LN_IC50	MTPN	2.99959	0.00987161	-0.0740815	-1.11327	1.03919	Resistant
													dasatinib	LN_IC50	EFNB2	-4.52557	0.000407571	-0.0699854	1.91011	-1.9801	Sensitive
													dasatinib	LN_IC50	BAG2	-3.41654	0.00464745	-1.17549	0.353198	-1.52868	Sensitive
													dasatinib	LN_IC50	LUM	-3.91292	0.00365347	-0.799579	1.4301	-2.22968	Sensitive
													dasatinib	LN_IC50	HPSE	-3.48118	0.0075631	-0.301288	1.48463	-1.78592	Sensitive
													dasatinib	LN_IC50	NGAL	-2.46144	0.0302608	-0.81518	0.986956	-1.80214	Sensitive
													dasatinib	LN_IC50	IRF9	3.07339	0.00762979	0.523865	-0.538298	1.06216	Resistant
													dasatinib	LN_IC50	IFM3	-3.21815	0.00645416	-0.614757	0.908475	-1.52323	Sensitive
													dasatinib	LN_IC50	B7Z1Y9	-5.47708	0.0119678	0.398841	3.00757	-2.60873	Sensitive
													dasatinib	LN_IC50	MCLN1	-5.55165	0.00260582	0.123706	2.42941	-2.30571	Sensitive
													dasatinib	LN_IC50	SPS2	3.92599	0.00121382	0.442631	-0.691185	1.13382	Resistant
													dasatinib	LN_IC50	SET	3.29946	0.0121882	-0.0387574	-1.27662	1.23786	Resistant
													dasatinib	LN_IC50	HIPK1	28.9696	9.03197e-05	0.119814	-0.993048	1.11286	Resistant
													dasatinib	LN_IC50	RTN2	2.76024	0.0164964	0.903196	-0.892114	1.79531	Resistant
													dasatinib	LN_IC50	EFNA1	4.66069	0.00346487	0.718124	-0.884636	1.60276	Resistant
													dasatinib	LN_IC50	UBA5	4.58329	0.000306356	0.0765722	-0.927645	1.00422	Resistant
													dasatinib	LN_IC50	RN128	-3.27618	0.0157062	-1.06939	0.931201	-2.00059	Sensitive
													dasatinib	LN_IC50	TRPC6	-5.66693	0.0297561	-0.347561	2.67845	-3.02601	Sensitive
													dasatinib	LN_IC50	GTR1	-2.55664	0.0290513	-0.0807888	1.21243	-1.29321	Sensitive
													dasatinib	LN_IC50	F173B	-3.9544	0.0108031	0.390352	1.41808	-1.02773	Sensitive
													dasatinib	LN_IC50	FHAD1	-9.749	0.000620078	-0.895271	2.49149	-3.38676	Sensitive
													dasatinib	LN_IC50	SMS2	-2.5514	0.0403797	-0.195595	1.12237	-1.31796	Sensitive
													dasatinib	LN_IC50	RWDD4	3.75424	0.00178078	0.35605	-0.745124	1.10117	Resistant
													dasatinib	LN_IC50	CYBR1	-3.34725	0.00853567	-0.352723	1.89849	-2.25122	Sensitive
													dasatinib	LN_IC50	HMGA2	-3.78517	0.00328452	-2.1065	0.947503	-3.05401	Sensitive
													dasatinib	LN_IC50	UN93B	-3.55012	0.0112214	0.254441	1.90581	-1.65137	Sensitive
													dasatinib	LN_IC50	GLYG	3.58842	0.00253739	0.32954	-0.873896	1.20344	Resistant
													dasatinib	LN_IC50	JDP2	-3.3927	0.0134397	-0.368067	1.28489	-1.65296	Sensitive
													dasatinib	LN_IC50	GLPT	2.73285	0.0340571	0.363004	-0.952653	1.31566	Resistant
													dasatinib	LN_IC50	GULP1	-3.20336	0.00678249	-0.0951958	1.01663	-1.11182	Sensitive
													dasatinib	LN_IC50	CLRN3	16.2624	0.000505868	-0.882266	-3.80217	2.91991	Resistant
													dasatinib	LN_IC50	LEG9C	-3.13166	0.0111945	-0.61445	1.89167	-2.50612	Sensitive
													dasatinib	LN_IC50	ANT3	-2.54338	0.0265164	-0.379724	0.630221	-1.00994	Sensitive
													dasatinib	LN_IC50	FBX22	2.85602	0.0144483	0.270519	-0.804374	1.07489	Resistant
													dasatinib	LN_IC50	DAZP2	3.57995	0.0231687	-0.173874	-2.22361	2.04973	Resistant
													dasatinib	LN_IC50	APEX2	2.59535	0.0391166	0.300147	-0.706992	1.00714	Resistant
													dasatinib	LN_IC50	SPRR3	-5.37991	0.00299055	-1.06172	2.54007	-3.60179	Sensitive
													dasatinib	LN_IC50	UBFD1	3.31648	0.00503513	0.0646638	-1.09761	1.16227	Resistant
													dasatinib	LN_IC50	GTSF1	-4.91007	0.00323538	-1.06001	2.64214	-3.70215	Sensitive
													dasatinib	LN_IC50	PAQR4	-17.4173	0.0365109	0.375298	2.33993	-1.96464	Sensitive
													dasatinib	LN_IC50	NR2CA	2.75278	0.0153757	0.266664	-0.84506	1.11172	Resistant
													dasatinib	LN_IC50	S35A2	4.82358	0.00292936	0.56241	-0.541127	1.10354	Resistant
													dasatinib	LN_IC50	VAMP8	-2.21149	0.0450841	0.309228	1.65227	-1.34304	Sensitive
													dasatinib	LN_IC50	KRCC1	4.88645	0.0394208	-0.396574	-2.58627	2.18969	Resistant
													dasatinib	LN_IC50	GI24	-4.1069	0.00580037	-0.907005	2.67667	-3.58368	Sensitive
													dasatinib	LN_IC50	ICAM2	-3.86892	0.00788737	-0.941544	1.34274	-2.28428	Sensitive
													dasatinib	LN_IC50	CATH	-2.25909	0.04006	-0.381109	1.2351	-1.61621	Sensitive
													dasatinib	LN_IC50	RET7	-2.83732	0.018126	0.428418	2.07403	-1.64561	Sensitive
													dasatinib	LN_IC50	DYLT3	2.21045	0.0480952	0.60747	-0.757618	1.36509	Resistant
													dasatinib	LN_IC50	ATOX1	2.9186	0.0101991	0.369474	-0.972394	1.34187	Resistant
													dasatinib	LN_IC50	CV039	3.13196	0.0315786	0.998221	-0.167806	1.16603	Resistant
													dasatinib	LN_IC50	NRK1	3.22994	0.0232074	0.0387084	-1.295	1.33371	Resistant
													dasatinib	LN_IC50	MOC2A	2.35978	0.0323414	0.27478	-0.75373	1.02851	Resistant
													dasatinib	LN_IC50	CLD11	-2.62801	0.0293524	-0.622387	1.98318	-2.60557	Sensitive
													dasatinib	LN_IC50	COR2A	-2.68227	0.0173188	-0.20374	0.801785	-1.00552	Sensitive
													dasatinib	LN_IC50	ETUD1	3.38921	0.00444481	0.360898	-0.701052	1.06195	Resistant
													dasatinib	LN_IC50	ZN121	-3.01646	0.0235263	-0.323098	0.80292	-1.12602	Sensitive
													dasatinib	LN_IC50	ZN808	-6.86274	0.0063349	-0.0865065	2.23568	-2.32219	Sensitive
													dasatinib	LN_IC50	RN5A	2.26416	0.0438702	0.648386	-0.542893	1.19128	Resistant
													dasatinib	LN_IC50	J3KN01	-2.89613	0.0120348	-0.53083	0.762504	-1.29333	Sensitive
													dasatinib	LN_IC50	ZN536	-15.5605	0.00410462	-0.112588	4.32193	-4.43452	Sensitive
													dasatinib	LN_IC50	KLF5	-3.8698	0.00176085	-0.852612	1.7979	-2.65051	Sensitive
													dasatinib	LN_IC50	G3V3L7	-5.37065	0.00582882	-0.189698	0.944975	-1.13467	Sensitive
													dasatinib	LN_IC50	Z324A	-20.9365	0.000238342	0.172221	2.14338	-1.97116	Sensitive
													dasatinib	LN_IC50	NOE2	13.3243	0.0476896	0.00474879	-1.30155	1.3063	Resistant
													dasatinib	LN_IC50	CRCM1	-2.84895	0.0189702	-0.114639	1.04492	-1.15956	Sensitive
													dasatinib	LN_IC50	SPR1B	-4.83466	0.00843268	-0.474783	1.71922	-2.19401	Sensitive
													dasatinib	LN_IC50	PEMT	-4.81257	0.00482988	-0.0549693	0.984015	-1.03898	Sensitive

## Sheet: dasatinib fusion mutation
Fusion
Gene	concordant_Cate	ModelID	PatientID	CellLineName	StrippedCellLineName	FusionName	JunctionReadCount	SpanningFragCount	SpliceType	LeftGene	LeftBreakpoint	RightGene	RightBreakpoint	LargeAnchorSupport	FFPM	LeftBreakDinuc	LeftBreakEntropy	RightBreakDinuc	RightBreakEntropy	annots	CCLE_count	otherFusionGene
GDAP1	Resistant	ACH-000258	PT-XTyUEa	Du4475	DU4475	GDAP1--MIR2052HG	4	2	ONLY_REF_SPLICE	GDAP1 (ENSG00000104381.12)	chr8:74363053:+	MIR2052HG (ENSG00000254349.5)	chr8:74612853:+	YES_LDAS	0.0702	GT	1.7465	AG	1.9219	[\CCLE_StarF2019\,\TCGA_StarF2019\,\INTRACHROMOSOMAL[chr8:0.11Mb]\]	71	MIR2052HG
PLCB1	Resistant	ACH-001394	PT-jgjbSo	SUM-229PE	SUM229PE	PLCB1--SMARCA2	4	2	ONLY_REF_SPLICE	PLCB1 (ENSG00000182621.17)	chr20:8371450:+	SMARCA2 (ENSG00000080503.23)	chr9:2028987:+	YES_LDAS	0.0614	GT	1.7819	AG	1.8256	[\INTERCHROMOSOMAL[chr20--chr9]\]	1	SMARCA2
ERN2	Sensitive	ACH-000910	PT-TFQ2Kc	MDA-MB-453	MDAMB453	PALB2--ERN2	3	6	INCL_NON_REF_SPLICE	PALB2 (ENSG00000083093.9)	chr16:23622969:-	ERN2 (ENSG00000134398.14)	chr16:23713586:-	YES_LDAS	0.1422	GT	1.6895	AG	1.6402	[\CCLE_StarF2019\,\INTRACHROMOSOMAL[chr16:0.05Mb]\,\LOCAL_REARRANGEMENT:-:[49016]\]	1	PALB2
PLCB1	Resistant	ACH-000028	PT-viJKnw	KPL-1	KPL1	TNS3--PLCB1	6	2	ONLY_REF_SPLICE	TNS3 (ENSG00000136205.16)	chr7:47302186:-	PLCB1 (ENSG00000182621.17)	chr20:8371382:+	YES_LDAS	0.1035	GT	1.8295	AG	1.9086	[\CCLE_StarF2019\,\INTERCHROMOSOMAL[chr7--chr20]\]	1	TNS3
PLCB1	Resistant	ACH-001390	PT-SMhk4C	SUM-149PT	SUM149PT	SPIDR--PLCB1	4	2	ONLY_REF_SPLICE	SPIDR (ENSG00000164808.16)	chr8:47440542:+	PLCB1 (ENSG00000182621.17)	chr20:8371382:+	YES_LDAS	0.0579	GT	1.6895	AG	1.9086	[\INTERCHROMOSOMAL[chr8--chr20]\]	1	SPIDR
Mutation
Gene	concordant_Cate	ModelID	PatientID	CellLineName	StrippedCellLineName	Chrom	Pos	Ref	Alt	AF	RefCount	AltCount	GT	PS	VariantType	VariantInfo	DNAChange	ProteinChange	HgncName	HgncFamily	Transcript	TranscriptExon	TranscriptStrand	UniprotID	Str	DbsnpID	DbsnpFilter	Issues	GcContent	LineageAssociation	CancerMolecularGenetics	CCLEDeleterious	StructuralRelation	CosmicHotspot	CosmicOverlappingMutations	AssociatedWith	LoF	Driver	LikelyDriver	TranscriptLikelyLoF	CivicID	CivicDescription	CivicScore	Popaf	LikelyGoF	LikelyLoF	HessDriver	HessSignature	CscapeScore
LRP1B	Sensitive	ACH-000212	PT-y6HadC	CAL-120	CAL120	chr2	140841040	G	C	0.182	18	3	0/1	NA	SNP	NONSENSE	c.4992C>G	p.Y1664*	LDL receptor related protein 1B	Low density lipoprotein receptors	ENST00000389484.8	30	-	Q9NZR2	NA	NA	NA	NA	0.339152	NA	NA	Y	NA	NA	NA	gene_function_loss;	NA	NA	NA	NA	NA	NA	NA	7.3	NA	Y	NA	NA	0.960033
LRP1B	Sensitive	ACH-000223	PT-Vntr9y	HCC1937	HCC1937	chr2	140503032	A	T	0.186	38	8	0/1	NA	SNP	MISSENSE	c.8593T>A	p.C2865S	LDL receptor related protein 1B	Low density lipoprotein receptors	ENST00000389484.8	54	-	Q9NZR2	NA	rs1257118221	NA	as_specific	0.359102	NA	NA	NA	NA	NA	NA	NA	NA	NA	NA	ENST00000389484;	NA	NA	NA	7.3	NA	NA	NA	NA	0.905583
LRP1B	Sensitive	ACH-000223	PT-Vntr9y	HCC1937	HCC1937	chr2	141020103	C	G	0.968	0	28	1|1	NA	SNP	SPLICE_SITE	c.e12+1G>C	NA	LDL receptor related protein 1B	Low density lipoprotein receptors	ENST00000389484.8	NA	-	Q9NZR2	NA	NA	NA	NA	0.339152	NA	NA	NA	NA	NA	NA	splicing;	NA	NA	NA	NA	NA	NA	NA	7.3	NA	NA	NA	NA	0.978473
PLCB1	Resistant	ACH-000111	PT-yKJqsn	HCC1187	HCC1187	chr20	8739281	C	T	0.333	30	14	0/1	NA	SNP	SILENT	c.2229C>T	p.A743A	phospholipase C beta 1	Phospholipases C2 domain containing phospholipases	ENST00000338037.11	21	+	Q9NQ66	NA	rs1337618676	NA	as_specific	0.386534	NA	NA	NA	NA	NA	NA	NA	NA	NA	NA	NA	NA	NA	NA	7.3	NA	NA	NA	NA	0.244553
[truncated: 11 more columns]

## Sheet: PP-1
The drug sensitivity results for PP-1 in protein level.
drugName	measure	Gene	t.statistic	p.value	mean(Resistant)	mean(Sensitive)	FC(R-S)	Category
PP-1	EC50	RNBP6	-3.22862	0.00829606	-0.385061	0.888561	-1.27362	Sensitive
PP-1	EC50	BICC1	-4.30226	0.00628039	-1.34944	0.422131	-1.77157	Sensitive
PP-1	EC50	HYPK	-2.42892	0.0410147	-0.809253	0.202391	-1.01164	Sensitive
PP-1	EC50	SEM7A	3.85409	0.0206654	0.418401	-0.660082	1.07848	Resistant
PP-1	EC50	MYH14	2.7145	0.0202397	1.62265	-0.0443212	1.66697	Resistant
PP-1	EC50	CTND1	2.54263	0.0267021	1.03876	-0.048184	1.08695	Resistant
PP-1	EC50	CTND1	2.73023	0.0195608	1.31831	-0.0789653	1.39727	Resistant
PP-1	EC50	PTPRK	3.06369	0.0140754	1.42913	0.316091	1.11304	Resistant
PP-1	EC50	S39AB	2.52324	0.0267496	1.39654	0.160505	1.23604	Resistant
PP-1	EC50	VINC	-2.64509	0.0235463	-0.599198	0.405346	-1.00454	Sensitive
PP-1	EC50	Q6ZN40	-2.76329	0.0222262	-1.50936	-0.0994801	-1.40988	Sensitive
PP-1	EC50	LN28A	-5.64841	0.0299558	-0.943233	2.87925	-3.82249	Sensitive
PP-1	EC50	DUS3	-3.60823	0.00399863	-0.753738	0.600041	-1.35378	Sensitive
PP-1	EC50	UAP1L	-2.46771	0.0316159	-0.843107	0.783763	-1.62687	Sensitive
PP-1	EC50	LAMA3	2.83989	0.0184457	1.18079	-0.612204	1.793	Resistant
PP-1	EC50	LAMB3	2.67646	0.0281499	1.21312	-0.827193	2.04032	Resistant
PP-1	EC50	AT1A4	4.0574	0.00372415	0.716028	-0.313295	1.02932	Resistant
PP-1	EC50	UGDH	-3.23733	0.00775631	-1.36803	-0.257609	-1.11042	Sensitive
PP-1	EC50	SCOT1	2.40999	0.0400164	1.03326	-0.50494	1.5382	Resistant
PP-1	EC50	AADAT	3.26495	0.0184514	1.00805	-0.336991	1.34504	Resistant
PP-1	EC50	LG3BP	4.13897	0.0014762	1.70611	-1.03673	2.74284	Resistant
PP-1	EC50	ANO6	2.41862	0.0416743	0.160625	-0.916375	1.077	Resistant
PP-1	EC50	TACD2	2.81229	0.0158269	2.65836	0.445154	2.21321	Resistant
PP-1	EC50	ITPR3	2.59866	0.0254195	0.731291	-0.303324	1.03462	Resistant
PP-1	EC50	MYO9A	-3.51376	0.00786963	-0.79459	0.403168	-1.19776	Sensitive
PP-1	EC50	FLNA	-2.57122	0.0252428	-0.318284	0.830522	-1.14881	Sensitive
PP-1	EC50	ELF3	3.4705	0.00653886	1.32616	-0.432911	1.75907	Resistant
PP-1	EC50	RAB25	3.05202	0.0139181	2.20935	-0.0670442	2.27639	Resistant
PP-1	EC50	ACD11	-3.30861	0.00686041	-0.753588	0.337011	-1.0906	Sensitive
PP-1	EC50	CP27A	2.68409	0.0219054	0.981586	-0.526244	1.50783	Resistant
PP-1	EC50	ARVC	2.58113	0.0260429	1.26362	0.114073	1.14954	Resistant
PP-1	EC50	EMAL1	-2.94398	0.0146996	-0.893801	0.499976	-1.39378	Sensitive
PP-1	EC50	NEUA	3.48695	0.00778323	0.385004	-0.678593	1.0636	Resistant
PP-1	EC50	TRI29	3.23001	0.0205589	2.09732	-1.00321	3.10053	Resistant
PP-1	EC50	ADRO	3.58775	0.00410272	0.678761	-0.498491	1.17725	Resistant
PP-1	EC50	TIG1	4.69831	0.00925454	4.37396	0.215348	4.15861	Resistant
PP-1	EC50	B4DGU4	2.6141	0.022944	0.941312	-0.0800164	1.02133	Resistant
PP-1	EC50	ADAT3	-3.26249	0.0103821	-0.641845	0.371633	-1.01348	Sensitive
PP-1	EC50	VGLL1	2.90694	0.032904	2.52931	-0.255192	2.7845	Resistant
PP-1	EC50	LY75	2.93837	0.0230419	1.7921	-0.390173	2.18227	Resistant
PP-1	EC50	THUM3	-2.82333	0.0220251	-0.454784	0.595452	-1.05024	Sensitive
PP-1	EC50	LAD1	2.73581	0.0187882	1.79649	-0.341513	2.13801	Resistant
PP-1	EC50	AP2B	2.41315	0.032774	1.75404	0.536992	1.21705	Resistant
PP-1	EC50	PYGL	-3.56738	0.00387131	-1.06774	0.0588309	-1.12657	Sensitive
PP-1	EC50	KKCC2	-3.01545	0.0263422	-0.748963	0.298156	-1.04712	Sensitive
PP-1	EC50	BIN1	-3.07308	0.0153489	-1.91974	-0.34022	-1.57952	Sensitive
PP-1	EC50	AMPH	-3.07549	0.0106944	-1.71124	-0.1108	-1.60044	Sensitive
PP-1	EC50	B1AKN8	3.0457	0.0177452	1.50658	-0.00182158	1.50841	Resistant
PP-1	EC50	SOX6	-2.68742	0.0277697	-1.31092	0.410064	-1.72098	Sensitive
PP-1	EC50	1A30	8.00825	0.00533669	2.85902	-0.454885	3.31391	Resistant
PP-1	EC50	HLAF	3.58217	0.0094893	1.28528	-0.327857	1.61314	Resistant
PP-1	EC50	H2AW	2.73724	0.0207788	1.54108	0.172044	1.36903	Resistant
PP-1	EC50	ITSN1	-4.23015	0.0323416	-0.41193	0.755408	-1.16734	Sensitive
PP-1	EC50	MOC2B	-2.45885	0.0321785	-0.578566	0.459275	-1.03784	Sensitive
PP-1	EC50	INF2	3.3185	0.00858921	1.00398	-0.17342	1.1774	Resistant
PP-1	EC50	TRI36	-6.57864	0.00302066	-1.09054	1.1774	-2.26793	Sensitive
PP-1	EC50	WDR35	-3.57553	0.00914262	-0.761313	0.278927	-1.04024	Sensitive
PP-1	EC50	FINC	-2.7075	0.0233018	-1.52171	-0.0120282	-1.50968	Sensitive
PP-1	EC50	EPHB2	2.78607	0.0219942	0.864035	-0.518145	1.38218	Resistant
PP-1	EC50	PLEC	2.94764	0.0123954	1.23078	0.221386	1.00939	Resistant
PP-1	EC50	PLEC	4.65515	0.0447106	1.34047	0.126555	1.21392	Resistant
PP-1	EC50	LTBP1	-2.66917	0.0271312	-0.293139	0.922295	-1.21543	Sensitive
PP-1	EC50	MSRB3	-2.94702	0.0263263	-1.24183	0.476254	-1.71808	Sensitive
PP-1	EC50	CP4FC	2.60516	0.0255407	0.438468	-0.791869	1.23034	Resistant
PP-1	EC50	ITB4	2.87945	0.0175631	1.40331	-0.524136	1.92744	Resistant
PP-1	EC50	SPB5	2.44987	0.0309383	1.82871	-0.489564	2.31828	Resistant
PP-1	EC50	STING	3.01846	0.0157078	1.1576	-0.70379	1.86139	Resistant
PP-1	EC50	JAG2	2.68947	0.0366453	1.31688	-0.176129	1.49301	Resistant
PP-1	EC50	CBPC1	-3.58796	0.0059474	-0.706092	0.659977	-1.36607	Sensitive
PP-1	EC50	BAHD1	6.86248	0.000556143	1.55987	0.489169	1.0707	Resistant
PP-1	EC50	CO039	2.83468	0.0223353	0.622221	-0.415192	1.03741	Resistant
PP-1	EC50	TREX1	2.5767	0.0245624	0.749119	-0.305587	1.05471	Resistant
PP-1	EC50	ACOX1	3.48649	0.0071305	1.10051	-0.130816	1.23132	Resistant
PP-1	EC50	PUR4	-2.38001	0.0348868	-1.12418	-0.0205497	-1.10363	Sensitive
PP-1	EC50	LYPD3	2.4701	0.0359564	2.88357	0.72086	2.16271	Resistant
PP-1	EC50	INSR	3.06216	0.0132814	0.80623	-0.394068	1.2003	Resistant
PP-1	EC50	FPRP	2.76007	0.0232142	0.857865	-0.263236	1.1211	Resistant
PP-1	EC50	PALD	-3.10439	0.029023	-1.4302	-0.102807	-1.3274	Sensitive
PP-1	EC50	DEFI6	2.4226	0.0385237	0.993931	-0.190069	1.184	Resistant
PP-1	EC50	E41L1	2.6871	0.0212073	1.36876	-0.193032	1.56179	Resistant
PP-1	EC50	CO1A2	-2.25931	0.0436562	-0.60251	0.690575	-1.29308	Sensitive
PP-1	EC50	RAB12	2.8044	0.0239623	1.23735	0.0705119	1.16684	Resistant
PP-1	EC50	RAB3A	3.0934	0.0102829	1.47136	0.0926447	1.37871	Resistant
PP-1	EC50	RAB3B	-2.94825	0.0152551	-1.01387	1.19096	-2.20482	Sensitive
PP-1	EC50	A4	3.22175	0.0243112	1.2401	0.0336288	1.20647	Resistant
PP-1	EC50	FERM2	-2.6139	0.0228369	-0.586704	0.763889	-1.35059	Sensitive
PP-1	EC50	MAPK5	-10.4553	0.00385825	-0.85774	0.14718	-1.00492	Sensitive
PP-1	EC50	TMM51	3.18702	0.0110326	0.642277	-0.588424	1.2307	Resistant
PP-1	EC50	ESRP1	3.21969	0.00799685	2.2267	-0.127764	2.35447	Resistant
PP-1	EC50	ITA6	2.38636	0.0397652	0.793667	-0.823019	1.61669	Resistant
PP-1	EC50	A6PVN8	-3.21616	0.0207207	-0.805413	0.499188	-1.3046	Sensitive
PP-1	EC50	GRHL2	3.09369	0.0123937	2.87852	0.518279	2.36024	Resistant
PP-1	EC50	ADAT2	-2.50709	0.048222	-1.25892	-0.0178024	-1.24112	Sensitive
PP-1	EC50	P4HA1	-2.57779	0.0264219	-0.704853	0.516963	-1.22182	Sensitive
PP-1	EC50	Q5VTI5	2.64103	0.0269083	1.79301	0.331474	1.46153	Resistant
PP-1	EC50	ZC21A	-2.43273	0.0335592	-0.840754	0.506045	-1.3468	Sensitive
PP-1	EC50	IF122	-3.63006	0.00732485	-0.564933	0.452746	-1.01768	Sensitive
PP-1	EC50	CADH1	3.33959	0.0062409	2.28142	0.110962	2.17045	Resistant
PP-1	EC50	LAMP3	5.97096	0.0109543	2.81238	-0.963139	3.77552	Resistant
PP-1	EC50	EPCAM	2.33137	0.0379764	2.0807	0.225454	1.85524	Resistant
PP-1	EC50	MOXD1	-3.05383	0.0139057	-1.18031	0.927047	-2.10736	Sensitive
PP-1	EC50	GATM	2.35557	0.0398507	2.03309	-0.256807	2.2899	Resistant
PP-1	EC50	ASC	2.76447	0.0228991	1.15227	-0.722723	1.87499	Resistant
PP-1	EC50	MYEF2	-2.31597	0.0394181	-0.234475	0.851116	-1.08559	Sensitive
PP-1	EC50	YS003	3.22356	0.0348277	1.50788	-0.167753	1.67564	Resistant
PP-1	EC50	KCC1A	-2.50209	0.0385443	-2.15172	0.134268	-2.28598	Sensitive
PP-1	EC50	SULF2	2.6867	0.0435097	1.38628	-0.360452	1.74673	Resistant
PP-1	EC50	GALT3	2.76353	0.0232836	1.5326	-0.113418	1.64602	Resistant
PP-1	EC50	CAP2	-2.26592	0.0431805	-0.490761	0.586997	-1.07776	Sensitive
PP-1	EC50	ARMC9	-2.53362	0.0307686	-0.745944	0.326003	-1.07195	Sensitive
PP-1	EC50	CDCA7	4.01393	0.023138	1.17288	-0.268607	1.44148	Resistant
PP-1	EC50	THEM6	3.29662	0.00638074	1.06557	-0.0734855	1.13906	Resistant
PP-1	EC50	OAT	2.69115	0.0208992	1.07614	-0.219047	1.29519	Resistant
PP-1	EC50	CAF17	3.2432	0.00768997	0.65925	-0.386066	1.04532	Resistant
PP-1	EC50	JCAD	3.21479	0.0165995	0.549868	-0.805645	1.35551	Resistant
PP-1	EC50	ATS1	-2.6204	0.0422093	-0.948209	1.58507	-2.53328	Sensitive
PP-1	EC50	PIAS3	-3.226	0.0369224	-0.756549	0.328041	-1.08459	Sensitive
PP-1	EC50	FA83B	2.37092	0.0480077	2.38546	0.388387	1.99707	Resistant
PP-1	EC50	ASM3B	2.20397	0.0497161	1.59173	0.0475017	1.54423	Resistant
PP-1	EC50	NIPS2	2.84584	0.017727	0.744598	-0.335724	1.08032	Resistant
PP-1	EC50	RON	2.5911	0.0241166	1.17105	-0.220965	1.39202	Resistant
PP-1	EC50	FGFR1	-2.62859	0.0337548	-0.50623	0.566727	-1.07296	Sensitive
PP-1	EC50	FRK	3.68501	0.00426908	0.965599	-0.6125	1.5781	Resistant
PP-1	EC50	FA83H	3.36578	0.00904846	1.93326	0.0402649	1.893	Resistant
PP-1	EC50	PTN6	2.45226	0.0324059	0.507326	-0.783619	1.29095	Resistant
PP-1	EC50	H6ST2	5.62761	0.046978	1.02795	-1.15707	2.18502	Resistant
PP-1	EC50	SRXN1	-3.03869	0.011422	-1.07542	0.181306	-1.25672	Sensitive
PP-1	EC50	DYH9	-2.64466	0.0256469	-0.878187	0.173012	-1.0512	Sensitive
PP-1	EC50	SODE	-4.22182	0.0483676	-0.946189	2.14293	-3.08911	Sensitive
PP-1	EC50	FAAH1	2.78575	0.026879	1.02914	-0.0749954	1.10413	Resistant
PP-1	EC50	CNN3	-3.01093	0.0135842	-0.515371	0.73786	-1.25323	Sensitive
PP-1	EC50	CNN1	-2.42384	0.0378297	-1.50268	0.350542	-1.85322	Sensitive
PP-1	EC50	SLPI	4.5779	0.000825887	2.38422	-0.473286	2.8575	Resistant
PP-1	EC50	CLD7	2.42943	0.0357004	2.49859	-0.30959	2.80818	Resistant
PP-1	EC50	RHG26	4.30609	0.00220999	0.772283	-0.418345	1.19063	Resistant
PP-1	EC50	MALT1	-2.29292	0.0430829	-0.776571	0.314812	-1.09138	Sensitive
PP-1	EC50	UB2R1	-2.97354	0.0136753	-0.874199	0.335803	-1.21	Sensitive
PP-1	EC50	ST1A3	2.39564	0.0392279	1.18925	-0.311869	1.50112	Resistant
PP-1	EC50	WDR54	-2.7258	0.0468354	-0.927596	0.258515	-1.18611	Sensitive
PP-1	EC50	S10AE	2.67889	0.0206165	3.14442	0.263972	2.88044	Resistant
PP-1	EC50	B1AH77	2.41028	0.0343823	0.94923	-0.71512	1.66435	Resistant
PP-1	EC50	ABC3D	2.3569	0.0465886	1.43254	-0.272051	1.70459	Resistant
PP-1	EC50	RGPS2	-3.43386	0.0128698	-0.289176	0.800201	-1.08938	Sensitive
PP-1	EC50	NGLY1	-3.27159	0.0105973	-0.541232	0.476294	-1.01753	Sensitive
PP-1	EC50	DSG3	2.2412	0.0466129	1.59299	-0.569334	2.16232	Resistant
PP-1	EC50	ESAM	4.32265	0.00914844	0.401858	-0.752913	1.15477	Resistant
PP-1	EC50	HEAT6	-2.86659	0.04607	-0.696319	0.373514	-1.06983	Sensitive
PP-1	EC50	ETV6	2.85917	0.0145387	0.577947	-0.538449	1.1164	Resistant
PP-1	EC50	PROM2	2.72715	0.021167	2.44024	0.371265	2.06897	Resistant
PP-1	EC50	SCRN3	-2.7767	0.0227465	-0.93126	0.145352	-1.07661	Sensitive
PP-1	EC50	KLK10	4.28844	0.0238338	3.01238	-1.32567	4.33805	Resistant
PP-1	EC50	NET4	-3.55116	0.0182909	0.667139	1.683	-1.01586	Sensitive
PP-1	EC50	IKBA	-3.11076	0.0487325	-0.577548	0.521619	-1.09917	Sensitive
PP-1	EC50	SH3G1	-3.26557	0.0121726	-0.778907	0.305211	-1.08412	Sensitive
PP-1	EC50	LSR	3.38535	0.00541449	1.4539	-0.0141418	1.46804	Resistant
PP-1	EC50	CTL2	2.63876	0.0249654	2.1312	0.82095	1.31025	Resistant
PP-1	EC50	C99L2	-3.29786	0.00636681	-1.08586	0.315201	-1.40106	Sensitive
PP-1	EC50	ARHGA	-2.89616	0.0152545	-0.442753	0.728961	-1.17171	Sensitive
PP-1	EC50	TRI38	2.42345	0.0347738	0.695835	-0.401232	1.09707	Resistant
PP-1	EC50	GLCI1	-2.33236	0.0479866	-0.501537	0.57232	-1.07386	Sensitive
PP-1	EC50	RIN2	4.35676	0.00478913	0.838011	-0.478726	1.31674	Resistant
PP-1	EC50	MB12B	-2.85664	0.0482272	-0.915024	0.464367	-1.37939	Sensitive
PP-1	EC50	ST2B1	6.58749	0.00121107	4.03853	0.0940917	3.94444	Resistant
PP-1	EC50	GP110	2.89767	0.0471254	1.68473	-1.58997	3.27471	Resistant
PP-1	EC50	PLIN3	-2.41801	0.0398065	-0.555116	0.447751	-1.00287	Sensitive
PP-1	EC50	EPHA1	2.66722	0.0382193	1.08152	-0.316988	1.3985	Resistant
PP-1	EC50	ST14	2.22598	0.0459418	1.68294	-0.128344	1.81128	Resistant
PP-1	EC50	MFSD6	3.27273	0.00990934	0.986694	-0.432255	1.41895	Resistant
PP-1	EC50	CUED2	-3.27495	0.0120453	-0.947858	0.203992	-1.15185	Sensitive
PP-1	EC50	ST32C	-3.07561	0.0280282	-0.9587	0.372623	-1.33132	Sensitive
PP-1	EC50	CHKB	-2.48602	0.0374699	-0.704099	0.411176	-1.11527	Sensitive
PP-1	EC50	PIN4	-2.6459	0.0257383	-0.876691	0.296451	-1.17314	Sensitive
PP-1	EC50	NDKA	-2.67591	0.0297015	-1.16923	0.0548889	-1.22412	Sensitive
PP-1	EC50	BNIP3	-2.87927	0.0183276	-0.572201	0.973704	-1.54591	Sensitive
PP-1	EC50	SGOL1	9.40099	3.49542e-05	1.58571	0.366706	1.219	Resistant
PP-1	EC50	MBP	3.61907	0.00401739	0.721918	-0.82016	1.54208	Resistant
PP-1	EC50	SEM4D	2.77967	0.0274497	0.894518	-0.412779	1.3073	Resistant
PP-1	EC50	PSB10	2.31272	0.0451571	0.822456	-0.676878	1.49933	Resistant
PP-1	EC50	CP24A	-3.47142	0.0314501	-1.57253	-0.427582	-1.14495	Sensitive
PP-1	EC50	MANEA	-2.60886	0.0362218	-0.794708	0.488301	-1.28301	Sensitive
PP-1	EC50	PHLA3	3.63165	0.0132217	1.23253	-0.232858	1.46538	Resistant
PP-1	EC50	SCF	3.36116	0.0121952	1.05951	-1.08098	2.14048	Resistant
PP-1	EC50	PUSL1	2.88737	0.0354418	0.620494	-0.482996	1.10349	Resistant
PP-1	EC50	COF2	-4.79969	0.00139155	-1.38079	0.489683	-1.87047	Sensitive
PP-1	EC50	ROGDI	-4.79749	0.0133736	-1.18474	0.352033	-1.53677	Sensitive
PP-1	EC50	BDH	2.32526	0.0384221	0.877771	-0.330833	1.2086	Resistant
PP-1	EC50	FA64A	3.27392	0.0162715	1.44009	-0.294087	1.73418	Resistant
PP-1	EC50	NAMPT	-2.20011	0.0488663	-0.950066	0.334437	-1.2845	Sensitive
PP-1	EC50	VAPA	2.68579	0.0284345	1.00508	-0.0079097	1.01299	Resistant
PP-1	EC50	PCAT2	5.00372	0.000366556	1.0824	-0.621731	1.70413	Resistant
PP-1	EC50	PKP1	3.37871	0.0145708	2.41382	-0.567405	2.98122	Resistant
PP-1	EC50	PKHA1	4.64743	0.000847242	0.661857	-0.358243	1.0201	Resistant
PP-1	EC50	HERC6	6.62557	0.0159299	3.55055	0.328544	3.222	Resistant
PP-1	EC50	IRF6	2.58373	0.0278977	1.73812	-0.267928	2.00605	Resistant
PP-1	EC50	CD033	-2.78283	0.0407205	-0.963436	0.457073	-1.42051	Sensitive
PP-1	EC50	S52A2	3.31556	0.0394221	1.06779	-0.359994	1.42778	Resistant
PP-1	EC50	CEAM1	3.135	0.0158707	1.33023	-1.07491	2.40513	Resistant
PP-1	EC50	PHLA2	2.54507	0.0270816	0.555227	-0.514469	1.0697	Resistant
PP-1	EC50	LGUL	-2.29275	0.0451282	-0.41557	0.634941	-1.05051	Sensitive
PP-1	EC50	DSC2	2.72914	0.0183223	1.71299	-0.193497	1.90648	Resistant
PP-1	EC50	DNJA4	2.47262	0.0490576	0.992078	-0.877735	1.86981	Resistant
PP-1	EC50	PHF13	4.50414	0.0109796	1.25574	0.000702388	1.25504	Resistant
PP-1	EC50	CEGT	-2.59997	0.0274365	-0.452311	0.741861	-1.19417	Sensitive
PP-1	EC50	ZCH24	-3.37026	0.0262218	-1.12286	0.767782	-1.89064	Sensitive
PP-1	EC50	EAA1	3.93188	0.0059339	1.54771	-0.828002	2.37571	Resistant
PP-1	EC50	GSTM1	-2.90391	0.021264	-1.6801	-0.414991	-1.2651	Sensitive
PP-1	EC50	GSTM3	-3.31303	0.00770289	-1.01054	1.4733	-2.48384	Sensitive
PP-1	EC50	GSTM4	-4.16079	0.00142388	-1.42968	0.793732	-2.22341	Sensitive
PP-1	EC50	GSTM2	-2.4306	0.0389602	-1.55318	0.213412	-1.76659	Sensitive
PP-1	EC50	CLD1	3.24154	0.0155572	1.71761	-0.15104	1.86865	Resistant
PP-1	EC50	CC50B	2.57019	0.0338891	1.90905	0.34468	1.56437	Resistant
PP-1	EC50	CP2S1	3.47694	0.00854838	0.789351	-0.962657	1.75201	Resistant
PP-1	EC50	TM141	3.71021	0.0100293	1.01559	-0.174225	1.18981	Resistant
PP-1	EC50	ESPN	2.64471	0.041838	0.786385	-0.754678	1.54106	Resistant
PP-1	EC50	FUT3	3.66218	0.0318259	1.39575	-0.509778	1.90553	Resistant
PP-1	EC50	LMCD1	-2.36399	0.0361208	-0.624388	1.06864	-1.69302	Sensitive
PP-1	EC50	WDR34	-3.98182	0.00413612	-0.493922	0.530433	-1.02435	Sensitive
PP-1	EC50	ODBB	2.34519	0.0474155	0.624775	-0.399944	1.02472	Resistant
PP-1	EC50	VTCN1	3.48136	0.0176479	4.35782	1.31559	3.04223	Resistant
PP-1	EC50	RABL5	-2.90962	0.0155753	-0.696555	0.368291	-1.06485	Sensitive
PP-1	EC50	RIPL1	-3.54985	0.00449647	-0.81288	0.476362	-1.28924	Sensitive
PP-1	EC50	RAB20	2.64727	0.0236727	1.26315	-0.0279728	1.29113	Resistant
PP-1	EC50	VISL1	3.59196	0.0116836	0.963507	-1.44537	2.40887	Resistant
PP-1	EC50	HPCL4	2.9077	0.0274831	0.346493	-1.67294	2.01943	Resistant
PP-1	EC50	CYLD	-4.77092	0.00386291	-1.04086	0.294644	-1.3355	Sensitive
PP-1	EC50	TINAL	2.49335	0.0325895	0.595775	-0.894018	1.48979	Resistant
PP-1	EC50	CHUR	-3.05963	0.0138032	-1.05413	0.139274	-1.19341	Sensitive
PP-1	EC50	FGFP1	5.59797	0.00528131	2.92245	-0.890002	3.81245	Resistant
PP-1	EC50	STAR3	-2.35579	0.042031	-0.284936	1.00672	-1.29165	Sensitive
PP-1	EC50	ANO1	3.64128	0.00774159	2.02834	-0.878351	2.90669	Resistant
PP-1	EC50	CO1A1	-2.51935	0.0370529	-0.890287	0.740532	-1.63082	Sensitive
PP-1	EC50	CO3A1	-3.62975	0.00708496	-1.0223	0.388258	-1.41056	Sensitive
PP-1	EC50	KCP3	2.4548	0.0495299	2.06387	-0.0654592	2.12933	Resistant
PP-1	EC50	TICRR	2.46771	0.0486478	0.908915	-0.287531	1.19645	Resistant
PP-1	EC50	NTM1A	-2.78734	0.0168113	-0.642118	0.38117	-1.02329	Sensitive
PP-1	EC50	ELF1	3.12474	0.0106059	0.476142	-0.548898	1.02504	Resistant
PP-1	EC50	B3GN3	2.73748	0.0260571	1.1391	-1.84337	2.98247	Resistant
PP-1	EC50	NAC1	-2.45434	0.045846	-0.562216	0.55287	-1.11509	Sensitive
PP-1	EC50	THTR	3.73691	0.00656403	0.715877	-0.691142	1.40702	Resistant
PP-1	EC50	AT11C	-2.6634	0.0206631	-0.810033	0.26046	-1.07049	Sensitive
PP-1	EC50	CDN2C	-3.57359	0.00452746	-1.40044	0.211149	-1.61159	Sensitive
PP-1	EC50	PRPS1	-2.82695	0.0157416	-0.909773	0.33585	-1.24562	Sensitive
PP-1	EC50	JOS1	3.34702	0.029411	0.826725	-0.31663	1.14336	Resistant
PP-1	EC50	SPIT2	2.27785	0.0431604	1.72521	0.0508332	1.67437	Resistant
PP-1	EC50	DNAL1	-4.7881	0.00229582	-0.870452	0.476876	-1.34733	Sensitive
PP-1	EC50	EFNB2	2.37529	0.0396773	1.38351	-0.102273	1.48579	Resistant
PP-1	EC50	ALKB4	-5.05539	0.000736486	-1.07846	-0.0662131	-1.01225	Sensitive
PP-1	EC50	NGAL	2.78097	0.0320279	1.76334	-1.10877	2.87211	Resistant
PP-1	EC50	RTTN	-5.67255	0.00595251	-1.60836	0.251242	-1.8596	Sensitive
PP-1	EC50	ENPP4	3.77861	0.00630808	1.7749	0.587213	1.18769	Resistant
PP-1	EC50	F173B	4.03693	0.0196428	1.31044	-0.0732438	1.38368	Resistant
PP-1	EC50	UBE2H	-2.63928	0.0216197	-0.705865	0.313066	-1.01893	Sensitive
PP-1	EC50	KCNN4	2.76743	0.0228198	1.37597	-0.734567	2.11053	Resistant
PP-1	EC50	URM1	-2.78599	0.0393181	-0.719476	0.282584	-1.00206	Sensitive
PP-1	EC50	RUNX2	2.28161	0.0472514	0.174334	-0.83347	1.0078	Resistant
PP-1	EC50	JDP2	2.83479	0.0297972	0.990437	-0.325936	1.31637	Resistant
PP-1	EC50	CO057	-8.48689	0.00140719	-1.30243	0.264336	-1.56676	Sensitive
PP-1	EC50	CBY1	-5.51999	0.0308644	-0.177125	1.27317	-1.4503	Sensitive
PP-1	EC50	ZDHC7	-4.5414	0.0203793	-0.521832	1.08226	-1.6041	Sensitive
PP-1	EC50	LEG9C	2.97944	0.0298302	1.68141	-0.70625	2.38766	Resistant
PP-1	EC50	LEG9	3.46521	0.0453538	2.47472	-1.56038	4.0351	Resistant
PP-1	EC50	FBX50	9.04603	0.00295111	2.17995	-0.149937	2.32989	Resistant
PP-1	EC50	GTSF1	20.9395	0.000139382	3.79828	-0.750964	4.54924	Resistant
PP-1	EC50	IL1RA	3.65215	0.00538239	1.50754	-0.562719	2.07026	Resistant
PP-1	EC50	VAMP8	2.57361	0.0243879	1.26023	-0.0551369	1.31537	Resistant
PP-1	EC50	CATH	3.17178	0.00820907	1.61184	-0.865289	2.47713	Resistant
PP-1	EC50	MOC2A	-2.99734	0.0257481	-1.11496	0.563046	-1.67801	Sensitive
PP-1	EC50	S35F2	3.37545	0.0190374	0.801415	-0.5713	1.37271	Resistant
PP-1	EC50	COR2A	5.71365	9.93836e-05	1.00039	-0.631778	1.63217	Resistant
PP-1	EC50	SLN13	11.7718	0.0071365	0.138613	-1.17722	1.31584	Resistant
PP-1	EC50	ZC3H3	3.6345	0.00666129	1.02256	-0.00828893	1.03085	Resistant
PP-1	EC50	PKP3	2.32167	0.0388543	1.42786	-0.11926	1.54712	Resistant
PP-1	EC50	CALD1	-2.41687	0.0325326	-0.84735	0.504652	-1.352	Sensitive
PP-1	EC50	KLF12	3.51584	0.0214935	0.870411	-0.555997	1.42641	Resistant
PP-1	EC50	KLF5	3.41974	0.00775432	1.67581	-0.871676	2.54748	Resistant
PP-1	EC50	PXK	-3.58127	0.010824	-1.14688	0.4315	-1.57838	Sensitive
PP-1	EC50	PEMT	5.16573	0.0217449	0.692544	-0.365764	1.05831	Resistant
PP-1	LN_EC50	BICC1	-4.26615	0.0144187	-1.34944	-0.0739802	-1.27546	Sensitive
PP-1	LN_EC50	MAGD2	-2.31022	0.0492449	-0.211615	0.949655	-1.16127	Sensitive
PP-1	LN_EC50	HYPK	-2.48822	0.034714	-0.809253	0.358178	-1.16743	Sensitive
PP-1	LN_EC50	CTND1	2.52459	0.0362156	1.03876	-0.26717	1.30593	Resistant
PP-1	LN_EC50	CTND1	2.52656	0.0357728	1.31831	-0.277698	1.59601	Resistant
PP-1	LN_EC50	NP1L1	-2.71066	0.0255539	-0.741649	0.285373	-1.02702	Sensitive
PP-1	LN_EC50	PTPRK	2.84491	0.0390208	1.42913	0.180727	1.24841	Resistant
PP-1	LN_EC50	FRAS1	2.76423	0.0429142	0.815249	-1.27587	2.09112	Resistant
PP-1	LN_EC50	S39AB	2.63975	0.0321464	1.39654	-0.0882915	1.48483	Resistant
PP-1	LN_EC50	VINC	-2.34411	0.0451352	-0.599198	0.438556	-1.03775	Sensitive
PP-1	LN_EC50	PLSL	2.5404	0.0411489	0.369467	-1.41998	1.78945	Resistant
PP-1	LN_EC50	PRR14	3.48008	0.0117499	0.585855	-0.47006	1.05591	Resistant
PP-1	LN_EC50	TPM4	-2.46326	0.0365957	-0.607624	0.560487	-1.16811	Sensitive
PP-1	LN_EC50	Q6ZN40	-2.73824	0.0229416	-1.50936	0.0944248	-1.60379	Sensitive
PP-1	LN_EC50	DUS3	-3.69877	0.00501522	-0.753738	0.691659	-1.4454	Sensitive
PP-1	LN_EC50	UAP1L	-2.50077	0.0344526	-0.843107	0.979438	-1.82254	Sensitive
PP-1	LN_EC50	PACN3	3.01945	0.0157927	1.06122	-0.0210274	1.08225	Resistant
PP-1	LN_EC50	LAMB3	3.84142	0.0130042	1.21312	-1.21559	2.42872	Resistant
PP-1	LN_EC50	PFD2	-3.33389	0.00886971	-0.619308	0.501172	-1.12048	Sensitive
PP-1	LN_EC50	UGDH	-3.15476	0.0204913	-1.36803	-0.0430484	-1.32498	Sensitive
PP-1	LN_EC50	SCOT1	2.73683	0.0298694	1.03326	-0.583453	1.61671	Resistant
PP-1	LN_EC50	NUB1	-3.26725	0.0132074	-0.774662	0.4164	-1.19106	Sensitive
PP-1	LN_EC50	DFFA	-3.60602	0.00599134	-1.03077	-0.00913653	-1.02163	Sensitive
PP-1	LN_EC50	LG3BP	3.04249	0.0173385	1.70611	-0.793521	2.49963	Resistant
PP-1	LN_EC50	ANO6	2.65509	0.0270498	0.160625	-1.11814	1.27876	Resistant
PP-1	LN_EC50	SPEE	-3.12135	0.0169792	-0.968603	0.285117	-1.25372	Sensitive
PP-1	LN_EC50	K1522	2.33351	0.0497191	1.19547	0.164085	1.03139	Resistant
PP-1	LN_EC50	TACD2	2.43521	0.0494887	2.65836	0.199039	2.45932	Resistant
PP-1	LN_EC50	MYO9A	-3.46018	0.0166159	-0.79459	0.692395	-1.48698	Sensitive
PP-1	LN_EC50	FLNA	-3.49831	0.00786398	-0.318284	1.06889	-1.38717	Sensitive
PP-1	LN_EC50	EHF	3.55064	0.0297326	2.46007	-0.91457	3.37464	Resistant
PP-1	LN_EC50	BRAF	-2.56361	0.0368589	-0.535817	0.538487	-1.0743	Sensitive
PP-1	LN_EC50	DCBD1	3.47923	0.0257223	0.382522	-0.81191	1.19443	Resistant
PP-1	LN_EC50	CP27A	3.90758	0.00493171	0.981586	-0.956121	1.93771	Resistant
PP-1	LN_EC50	ARVC	3.1358	0.0211727	1.26362	-0.342209	1.60582	Resistant
PP-1	LN_EC50	VMA5A	-4.7902	0.0409004	-0.834219	0.888257	-1.72248	Sensitive
PP-1	LN_EC50	NRIP1	3.19851	0.0187003	1.19583	-0.159502	1.35533	Resistant
PP-1	LN_EC50	NEUA	3.28981	0.00941478	0.385004	-0.752061	1.13707	Resistant
PP-1	LN_EC50	ADHX	-2.5877	0.029327	-0.762325	0.260257	-1.02258	Sensitive
PP-1	LN_EC50	TRI29	3.37984	0.0177685	2.09732	-1.13189	3.22921	Resistant
PP-1	LN_EC50	ADRO	4.25982	0.00464877	0.678761	-0.873861	1.55262	Resistant
PP-1	LN_EC50	TIG1	81.49	0.000299466	4.37396	-0.764517	5.13848	Resistant
PP-1	LN_EC50	SPTN1	2.71369	0.0320191	0.335111	-0.862354	1.19746	Resistant
PP-1	LN_EC50	MOCS3	-2.36269	0.0430309	-0.538769	0.761888	-1.30066	Sensitive
PP-1	LN_EC50	B4DGU4	2.58727	0.0338617	0.941312	-0.272351	1.21366	Resistant
PP-1	LN_EC50	ADAT3	-2.91753	0.0245526	-0.641845	0.474139	-1.11598	Sensitive
PP-1	LN_EC50	LY75	4.22707	0.0200413	1.7921	-0.683058	2.47515	Resistant
PP-1	LN_EC50	THUM3	-2.73466	0.0230498	-0.454784	0.72771	-1.18249	Sensitive
PP-1	LN_EC50	PYGL	-3.2612	0.0144538	-1.06774	0.20175	-1.26949	Sensitive
PP-1	LN_EC50	KKCC2	-3.23126	0.0174017	-0.748963	0.42185	-1.17081	Sensitive
PP-1	LN_EC50	AMPH	-2.63294	0.0448787	-1.71124	0.181624	-1.89286	Sensitive
PP-1	LN_EC50	BAG3	-3.28215	0.0133052	0.0347922	1.32678	-1.29198	Sensitive
PP-1	LN_EC50	B1AKN8	6.40325	0.0014529	1.50658	-0.542884	2.04947	Resistant
PP-1	LN_EC50	HTR5A	-2.76508	0.0254534	-0.442306	0.75954	-1.20185	Sensitive
PP-1	LN_EC50	SOX6	-2.78833	0.0481607	-1.31092	0.109061	-1.41998	Sensitive
PP-1	LN_EC50	1A30	7.35512	0.00519568	2.85902	-0.529541	3.38856	Resistant
PP-1	LN_EC50	HLAF	4.257	0.00558315	1.28528	-0.562011	1.84729	Resistant
PP-1	LN_EC50	H2AW	4.04331	0.0038073	1.54108	-0.326894	1.86797	Resistant
PP-1	LN_EC50	SHRM1	-4.01057	0.0197384	-0.678054	1.01742	-1.69547	Sensitive
PP-1	LN_EC50	IKZF1	8.86962	0.0216536	-0.565715	-2.10542	1.53971	Resistant
PP-1	LN_EC50	ANXA5	-2.88965	0.0178967	-0.685676	0.556082	-1.24176	Sensitive
PP-1	LN_EC50	MOC2B	-3.15224	0.016808	-0.578566	0.763689	-1.34225	Sensitive
PP-1	LN_EC50	INF2	3.47756	0.00719024	1.00398	-0.28343	1.28741	Resistant
PP-1	LN_EC50	DSG2	2.59678	0.0292372	0.831844	-0.533615	1.36546	Resistant
PP-1	LN_EC50	TRI36	-4.93206	0.049505	-1.09054	1.02086	-2.1114	Sensitive
PP-1	LN_EC50	WDR35	-2.88123	0.0473264	-0.761313	0.395789	-1.1571	Sensitive
PP-1	LN_EC50	TRAF4	2.55502	0.044849	0.786637	-0.479751	1.26639	Resistant
PP-1	LN_EC50	PGK1	-2.5927	0.0354782	-0.758134	0.490421	-1.24855	Sensitive
PP-1	LN_EC50	AZI2	-3.27441	0.0100563	-0.224981	0.819743	-1.04472	Sensitive
PP-1	LN_EC50	EPHB3	2.87875	0.0209176	1.19385	-0.168919	1.36277	Resistant
PP-1	LN_EC50	EPHB2	3.06464	0.0191951	0.864035	-0.54195	1.40599	Resistant
PP-1	LN_EC50	EPHA4	-5.15893	0.0127983	0.0764611	1.80499	-1.72853	Sensitive
PP-1	LN_EC50	IVD	2.45006	0.0426411	0.762782	-0.389796	1.15258	Resistant
PP-1	LN_EC50	TM10A	-3.42198	0.0165014	-0.777599	0.359572	-1.13717	Sensitive
PP-1	LN_EC50	VAT1L	-3.23313	0.0179055	-1.45187	-0.276668	-1.17521	Sensitive
PP-1	LN_EC50	CP4FC	2.84751	0.0191681	0.438468	-0.977998	1.41647	Resistant
PP-1	LN_EC50	ITB4	2.74837	0.0227575	1.40331	-0.735216	2.13852	Resistant
PP-1	LN_EC50	STING	3.14535	0.0206139	1.1576	-0.562841	1.72044	Resistant
PP-1	LN_EC50	JAG2	2.71343	0.0458457	1.31688	-0.354272	1.67116	Resistant
PP-1	LN_EC50	CBPC1	-3.13739	0.0224337	-0.706092	0.78355	-1.48964	Sensitive
PP-1	LN_EC50	BAHD1	6.40083	0.00539118	1.55987	0.345266	1.2146	Resistant
PP-1	LN_EC50	ACOX1	3.04629	0.0315188	1.10051	-0.268899	1.36941	Resistant
PP-1	LN_EC50	HMGN3	2.34546	0.048666	0.489897	-0.513673	1.00357	Resistant
PP-1	LN_EC50	NEDD4	-2.77698	0.022777	-0.557653	0.743957	-1.30161	Sensitive
PP-1	LN_EC50	NEDD4	-2.42125	0.0386174	-0.303442	0.766937	-1.07038	Sensitive
PP-1	LN_EC50	INSR	3.45509	0.0119218	0.80623	-0.406456	1.21269	Resistant
PP-1	LN_EC50	FPRP	2.90914	0.0175334	0.857865	-0.43773	1.2956	Resistant
PP-1	LN_EC50	PALD	-2.82722	0.0368026	-1.4302	0.0401984	-1.4704	Sensitive
PP-1	LN_EC50	DEFI6	2.48668	0.0483239	0.993931	-0.475725	1.46966	Resistant
PP-1	LN_EC50	UBAP1	-3.03216	0.0150105	-0.305254	0.757694	-1.06295	Sensitive
PP-1	LN_EC50	MCP	3.42182	0.0116037	0.77648	-0.275251	1.05173	Resistant
PP-1	LN_EC50	NCK5L	-4.02736	0.0136741	-0.290524	0.815651	-1.10617	Sensitive
PP-1	LN_EC50	BCAM	2.33771	0.0442774	1.78404	0.089671	1.69436	Resistant
PP-1	LN_EC50	CB044	-3.37111	0.0245092	-0.769922	0.284553	-1.05447	Sensitive
PP-1	LN_EC50	RAB12	2.82533	0.0222264	1.23735	0.0162764	1.22108	Resistant
PP-1	LN_EC50	RAB3A	2.78685	0.024223	1.47136	0.265675	1.20568	Resistant
PP-1	LN_EC50	RAB3B	-2.85826	0.0427943	-1.01387	1.77483	-2.7887	Sensitive
PP-1	LN_EC50	MAPK5	-11.3023	0.00823573	-0.85774	0.201848	-1.05959	Sensitive
PP-1	LN_EC50	H9KV77	-2.64484	0.0410455	-0.852413	0.479723	-1.33214	Sensitive
PP-1	LN_EC50	TMM51	2.87477	0.0237653	0.642277	-0.739906	1.38218	Resistant
PP-1	LN_EC50	ASNS	-2.66985	0.0260716	-1.13675	0.0553674	-1.19212	Sensitive
PP-1	LN_EC50	ITA6	2.40621	0.0395018	0.793667	-0.992715	1.78638	Resistant
PP-1	LN_EC50	A6PVN8	-3.30871	0.017899	-0.805413	0.552461	-1.35787	Sensitive
PP-1	LN_EC50	ZC21A	-2.56645	0.0313532	-0.840754	0.764127	-1.60488	Sensitive
PP-1	LN_EC50	2ABB	-2.95652	0.0161769	-0.689027	0.413183	-1.10221	Sensitive
PP-1	LN_EC50	IF122	-3.70606	0.016722	-0.564933	0.531411	-1.09634	Sensitive
PP-1	LN_EC50	CADH1	2.72402	0.0380644	2.28142	-0.23808	2.5195	Resistant
PP-1	LN_EC50	RISC	2.85901	0.022524	0.716891	-0.428419	1.14531	Resistant
PP-1	LN_EC50	EPCAM	2.40414	0.0488415	2.0807	-0.320329	2.40103	Resistant
PP-1	LN_EC50	MOXD1	-3.19923	0.0134189	-1.18031	0.560486	-1.7408	Sensitive
PP-1	LN_EC50	GATM	2.81431	0.0202592	2.03309	-0.824324	2.85742	Resistant
PP-1	LN_EC50	ASC	2.87601	0.0183423	1.15227	-1.0307	2.18297	Resistant
PP-1	LN_EC50	RNF14	-2.76442	0.0242946	-0.378386	1.02012	-1.3985	Sensitive
PP-1	LN_EC50	DPP8	-2.38044	0.0491059	-0.678808	0.511327	-1.19013	Sensitive
PP-1	LN_EC50	FNTA	-2.66732	0.0290971	-0.623167	0.383021	-1.00619	Sensitive
PP-1	LN_EC50	NRBP2	-3.525	0.0267414	-0.446762	1.14211	-1.58887	Sensitive
PP-1	LN_EC50	SYYC	-2.35168	0.0435312	-0.858888	0.229333	-1.08822	Sensitive
PP-1	LN_EC50	CAP2	-2.41996	0.0425049	-0.490761	0.843308	-1.33407	Sensitive
PP-1	LN_EC50	ARMC9	-3.01456	0.0371312	-0.745944	0.857677	-1.60362	Sensitive
PP-1	LN_EC50	STEA4	2.56425	0.0449057	1.82694	-0.570914	2.39785	Resistant
PP-1	LN_EC50	CDCA7	3.27521	0.0477552	1.17288	-0.402312	1.57519	Resistant
PP-1	LN_EC50	ESTD	-2.40984	0.0438012	-0.752257	0.332975	-1.08523	Sensitive
PP-1	LN_EC50	PFD1	-3.24662	0.0100656	-0.636417	0.384883	-1.0213	Sensitive
PP-1	LN_EC50	COM1	4.65544	0.00933443	0.827247	-0.818884	1.64613	Resistant
PP-1	LN_EC50	OAT	3.54837	0.00652791	1.07614	-0.520758	1.5969	Resistant
PP-1	LN_EC50	CAF17	3.66854	0.00546971	0.65925	-0.630311	1.28956	Resistant
PP-1	LN_EC50	HACD2	3.44063	0.0143461	0.983668	-0.262615	1.24628	Resistant
PP-1	LN_EC50	PFD6	-3.14198	0.0120918	-0.658011	0.437162	-1.09517	Sensitive
PP-1	LN_EC50	JCAD	3.86234	0.0110152	0.549868	-0.966153	1.51602	Resistant
PP-1	LN_EC50	PIAS3	-2.80717	0.0488238	-0.756549	0.318278	-1.07483	Sensitive
PP-1	LN_EC50	ASM3B	2.69843	0.0368338	1.59173	-0.675701	2.26743	Resistant
PP-1	LN_EC50	NIPS2	3.50639	0.00668818	0.744598	-0.661752	1.40635	Resistant
PP-1	LN_EC50	VEGFA	-3.38623	0.0455958	-0.659896	1.08189	-1.74178	Sensitive
PP-1	LN_EC50	F174A	-11.9673	0.000911262	0.274736	2.01421	-1.73947	Sensitive
PP-1	LN_EC50	J3QRU1	3.90258	0.0038756	0.704549	-0.317693	1.02224	Resistant
PP-1	LN_EC50	FRK	3.82355	0.0101504	0.965599	-0.971354	1.93695	Resistant
PP-1	LN_EC50	FA83H	2.68499	0.0250123	1.93326	0.214954	1.71831	Resistant
PP-1	LN_EC50	SRXN1	-2.63779	0.0373243	-1.07542	0.383691	-1.45911	Sensitive
PP-1	LN_EC50	DYH9	-2.89803	0.0177071	-0.878187	0.421433	-1.29962	Sensitive
PP-1	LN_EC50	PFD3	-2.94811	0.016595	-0.717288	0.447979	-1.16527	Sensitive
PP-1	LN_EC50	CLIC4	-2.65468	0.0271176	-0.740189	0.341586	-1.08177	Sensitive
PP-1	LN_EC50	FAAH1	3.72078	0.0202573	1.02914	-0.634387	1.66352	Resistant
PP-1	LN_EC50	SRBS2	2.96713	0.0178174	0.819268	-1.04487	1.86414	Resistant
PP-1	LN_EC50	CNN3	-2.96003	0.0159587	-0.515371	0.825863	-1.34123	Sensitive
PP-1	LN_EC50	H10	2.4491	0.0375612	0.485682	-0.579809	1.06549	Resistant
PP-1	LN_EC50	SLPI	3.23711	0.0139302	2.38422	0.0799446	2.30427	Resistant
PP-1	LN_EC50	UB2R1	-2.43955	0.0395461	-0.874199	0.318757	-1.19296	Sensitive
PP-1	LN_EC50	UB2G1	-2.7538	0.0236506	-0.982649	0.0322397	-1.01489	Sensitive
PP-1	LN_EC50	NAA15	-2.49776	0.0349758	-0.518972	0.49926	-1.01823	Sensitive
PP-1	LN_EC50	PTN12	-3.42687	0.00771609	-0.702615	0.375092	-1.07771	Sensitive
PP-1	LN_EC50	OTU6B	-2.5591	0.0395371	-0.352705	0.792452	-1.14516	Sensitive
PP-1	LN_EC50	RSF1	2.46912	0.0373123	0.424634	-0.581769	1.0064	Resistant
PP-1	LN_EC50	RGPS2	-3.62381	0.0109212	-0.289176	0.853375	-1.14255	Sensitive
PP-1	LN_EC50	FBLN1	2.60369	0.031525	0.969666	-0.254053	1.22372	Resistant
PP-1	LN_EC50	ECHP	2.7447	0.025186	0.746841	-0.719543	1.46638	Resistant
PP-1	LN_EC50	PHP14	-2.43167	0.0379703	-0.779873	0.836521	-1.61639	Sensitive
PP-1	LN_EC50	NGLY1	-4.30607	0.00349607	-0.541232	0.732087	-1.27332	Sensitive
PP-1	LN_EC50	DSG3	4.37469	0.00365695	1.59299	-1.47426	3.06725	Resistant
PP-1	LN_EC50	PEX19	-2.68429	0.0278072	-0.58676	0.464801	-1.05156	Sensitive
PP-1	LN_EC50	ESAM	7.51124	0.00488929	0.401858	-0.950297	1.35215	Resistant
PP-1	LN_EC50	TNG6	-2.54948	0.0445898	-0.909131	0.109396	-1.01853	Sensitive
PP-1	LN_EC50	HEAT6	-2.95107	0.0379498	-0.696319	0.460807	-1.15713	Sensitive
PP-1	LN_EC50	ZYX	-4.61234	0.00326677	-0.842918	0.53454	-1.37746	Sensitive
PP-1	LN_EC50	ETV6	3.24262	0.0107754	0.577947	-0.726126	1.30407	Resistant
PP-1	LN_EC50	SCRN3	-3.44745	0.00910307	-0.93126	0.389567	-1.32083	Sensitive
PP-1	LN_EC50	SMG8	-2.59643	0.0335074	-0.723212	0.374785	-1.098	Sensitive
PP-1	LN_EC50	PGTB1	-3.11501	0.0130926	-0.581545	0.496026	-1.07757	Sensitive
PP-1	LN_EC50	SH3G1	-3.37367	0.00871489	-0.778907	0.447347	-1.22625	Sensitive
PP-1	LN_EC50	TCEA2	-6.73849	0.00126496	-0.645132	0.427599	-1.07273	Sensitive
PP-1	LN_EC50	PBDC1	-3.01745	0.0236009	-0.834056	0.593337	-1.42739	Sensitive
PP-1	LN_EC50	LSR	2.76903	0.0315032	1.4539	-0.196661	1.65056	Resistant
PP-1	LN_EC50	FZD1	-3.73374	0.0206827	0.034736	1.20363	-1.1689	Sensitive
PP-1	LN_EC50	CTL2	2.32992	0.0469771	2.1312	0.688555	1.44264	Resistant
PP-1	LN_EC50	C99L2	-3.2006	0.0155732	-1.08586	0.576681	-1.66254	Sensitive
PP-1	LN_EC50	RIN2	3.58909	0.0176703	0.838011	-0.378891	1.2169	Resistant
PP-1	LN_EC50	DYN1	2.79565	0.0239653	-0.0435578	-1.13733	1.09377	Resistant
PP-1	LN_EC50	SPTN2	2.7165	0.0239181	0.983423	-0.235727	1.21915	Resistant
PP-1	LN_EC50	CRYAB	2.7906	0.03115	1.08958	-0.362208	1.45179	Resistant
PP-1	LN_EC50	MB12B	-2.97665	0.0409466	-0.915024	0.737635	-1.65266	Sensitive
PP-1	LN_EC50	PLIN3	-3.33575	0.0124593	-0.555116	0.744816	-1.29993	Sensitive
PP-1	LN_EC50	CCYL1	2.64574	0.0291385	0.604274	-0.667089	1.27136	Resistant
PP-1	LN_EC50	ERG24	2.74976	0.0272242	0.878635	-0.573773	1.45241	Resistant
PP-1	LN_EC50	CUED2	-3.44978	0.013499	-0.947858	0.19529	-1.14315	Sensitive
PP-1	LN_EC50	DCAKD	2.72457	0.0312057	0.458937	-0.732025	1.19096	Resistant
PP-1	LN_EC50	LPP2	3.0552	0.0176825	0.817957	-0.555013	1.37297	Resistant
PP-1	LN_EC50	PIN4	-2.38248	0.0412814	-0.876691	0.339816	-1.21651	Sensitive
PP-1	LN_EC50	BNIP3	-5.27315	0.00139269	-0.572201	1.58665	-2.15885	Sensitive
PP-1	LN_EC50	DDB2	2.43996	0.0407123	0.23969	-0.937604	1.17729	Resistant
PP-1	LN_EC50	AMPD2	-2.45929	0.0486157	-0.764241	0.255134	-1.01938	Sensitive
PP-1	LN_EC50	SGOL1	7.22276	0.00129962	1.58571	0.335323	1.25039	Resistant
PP-1	LN_EC50	GAB2	2.46526	0.0417117	0.721075	-1.00963	1.7307	Resistant
PP-1	LN_EC50	MBP	3.65911	0.00616824	0.721918	-0.663848	1.38577	Resistant
PP-1	LN_EC50	SEM4D	3.14713	0.016608	0.894518	-0.669547	1.56407	Resistant
PP-1	LN_EC50	AP4E1	-2.51934	0.0413927	-0.641765	0.390072	-1.03184	Sensitive
PP-1	LN_EC50	RABEK	-3.2183	0.010653	-0.740082	0.40893	-1.14901	Sensitive
PP-1	LN_EC50	PHLA3	2.89664	0.0284133	1.23253	-0.17856	1.41109	Resistant
PP-1	LN_EC50	GCR	-3.20223	0.0165298	-0.156892	0.850913	-1.00781	Sensitive
PP-1	LN_EC50	PDCD5	-2.32704	0.0475069	-0.788801	0.26519	-1.05399	Sensitive
PP-1	LN_EC50	PUSL1	2.67665	0.0435321	0.620494	-0.415322	1.03582	Resistant
PP-1	LN_EC50	COF2	-2.81053	0.0454812	-1.38079	0.321074	-1.70186	Sensitive
PP-1	LN_EC50	ROGDI	-4.13154	0.0259677	-1.18474	0.419591	-1.60433	Sensitive
PP-1	LN_EC50	FA64A	2.67688	0.0407401	1.44009	-0.306454	1.74655	Resistant
PP-1	LN_EC50	NAMPT	-3.35253	0.0119445	-0.950066	1.09113	-2.0412	Sensitive
PP-1	LN_EC50	VAPA	2.92837	0.0197035	1.00508	-0.118396	1.12347	Resistant
PP-1	LN_EC50	VAPA	2.48671	0.0372688	0.965067	-0.0988463	1.06391	Resistant
PP-1	LN_EC50	PCAT2	5.07519	0.000675635	1.0824	-0.66813	1.75053	Resistant
PP-1	LN_EC50	PKP1	4.2218	0.0106778	2.41382	-0.928479	3.34229	Resistant
PP-1	LN_EC50	PKHA1	4.09921	0.00307082	0.661857	-0.391838	1.0537	Resistant
PP-1	LN_EC50	PTN2	2.91428	0.0172459	0.610762	-0.540643	1.1514	Resistant
PP-1	LN_EC50	ACS2L	2.75931	0.0265871	0.485452	-0.964188	1.44964	Resistant
PP-1	LN_EC50	S52A2	3.20375	0.048811	1.06779	-0.281196	1.34898	Resistant
PP-1	LN_EC50	CEAM1	2.3692	0.0453262	1.33023	-0.723838	2.05407	Resistant
PP-1	LN_EC50	PHLA2	2.28782	0.0496559	0.555227	-0.536896	1.09212	Resistant
PP-1	LN_EC50	FURIN	3.06181	0.0305374	0.010859	-1.2464	1.25726	Resistant
PP-1	LN_EC50	MT1G	-3.13237	0.0168682	-1.09622	1.14856	-2.24478	Sensitive
PP-1	LN_EC50	LGUL	-3.27735	0.0189753	-0.41557	1.19855	-1.61412	Sensitive
PP-1	LN_EC50	DSC2	2.94903	0.0209782	1.71299	-0.646226	2.35921	Resistant
PP-1	LN_EC50	PHF13	7.45331	0.00558069	1.25574	-0.222332	1.47808	Resistant
PP-1	LN_EC50	EAA1	3.60264	0.00659704	1.54771	-0.836461	2.38417	Resistant
PP-1	LN_EC50	SENP5	5.72602	0.00125532	0.261396	-0.886945	1.14834	Resistant
PP-1	LN_EC50	GSTM4	-3.10602	0.0225841	-1.42968	0.827236	-2.25691	Sensitive
PP-1	LN_EC50	CLD1	5.14335	0.00620865	1.71761	-0.869152	2.58676	Resistant
PP-1	LN_EC50	CP2S1	3.73123	0.00539732	0.789351	-1.1882	1.97755	Resistant
PP-1	LN_EC50	TM141	2.92171	0.0447691	1.01559	-0.0913191	1.10691	Resistant
PP-1	LN_EC50	BCL10	-2.37726	0.0414348	-0.722816	0.340589	-1.0634	Sensitive
PP-1	LN_EC50	ODBB	2.50585	0.0350993	0.624775	-0.540647	1.16542	Resistant
PP-1	LN_EC50	SBDS	-3.02873	0.0142873	-0.984236	0.214106	-1.19834	Sensitive
PP-1	LN_EC50	DPH5	-3.62892	0.00671297	-0.625811	0.540213	-1.16602	Sensitive
PP-1	LN_EC50	RABL5	-3.29432	0.0183162	-0.696555	0.63971	-1.33626	Sensitive
PP-1	LN_EC50	RIPL1	-3.57834	0.0123992	-0.81288	0.771502	-1.58438	Sensitive
PP-1	LN_EC50	PFD5	-2.60819	0.0283911	-0.694255	0.311428	-1.00568	Sensitive
PP-1	LN_EC50	SCML2	-2.30379	0.0476098	-0.445682	0.637793	-1.08348	Sensitive
PP-1	LN_EC50	ARGI2	2.68444	0.0297412	0.511392	-1.64772	2.15911	Resistant
PP-1	LN_EC50	VISL1	3.31879	0.0166467	0.963507	-1.25555	2.21906	Resistant
PP-1	LN_EC50	HPCL4	2.58484	0.0415911	0.346493	-1.46748	1.81397	Resistant
PP-1	LN_EC50	CYLD	-4.54696	0.02832	-1.04086	0.576062	-1.61692	Sensitive
PP-1	LN_EC50	TINAL	3.37313	0.0142068	0.595775	-1.4936	2.08938	Resistant
PP-1	LN_EC50	ANO1	3.41352	0.00920479	2.02834	-1.01219	3.04053	Resistant
PP-1	LN_EC50	H33	3.32894	0.0129564	0.597712	-0.404124	1.00184	Resistant
PP-1	LN_EC50	CINP	-5.40874	0.00187235	-0.524678	0.592642	-1.11732	Sensitive
PP-1	LN_EC50	CEP41	-2.5202	0.0481949	-0.657862	0.461086	-1.11895	Sensitive
PP-1	LN_EC50	NTM1A	-2.72486	0.0273531	-0.642118	0.56787	-1.20999	Sensitive
PP-1	LN_EC50	ELF1	2.72125	0.0247503	0.476142	-0.593467	1.06961	Resistant
PP-1	LN_EC50	THTR	3.5345	0.00675991	0.715877	-0.760882	1.47676	Resistant
PP-1	LN_EC50	CDN2C	-2.7525	0.0304266	-1.40044	0.200478	-1.60092	Sensitive
PP-1	LN_EC50	PRPS1	-4.30798	0.00199174	-0.909773	0.854345	-1.76412	Sensitive
PP-1	LN_EC50	JOS1	3.34702	0.029411	0.826725	-0.31663	1.14336	Resistant
PP-1	LN_EC50	DNAL1	-5.24102	0.00194758	-0.870452	0.275592	-1.14604	Sensitive
PP-1	LN_EC50	MTPN	-2.58892	0.038201	-0.942669	0.247427	-1.1901	Sensitive
PP-1	LN_EC50	EFNB2	2.59191	0.03507	1.38351	-0.0809485	1.46446	Resistant
PP-1	LN_EC50	ALKB4	-7.74811	0.000112698	-1.07846	0.160942	-1.2394	Sensitive
PP-1	LN_EC50	E9PL57	-2.44794	0.0390064	-0.485439	0.590449	-1.07589	Sensitive
PP-1	LN_EC50	ENPP4	6.81919	0.00179487	1.7749	0.0979033	1.677	Resistant
PP-1	LN_EC50	MET7A	3.07824	0.0132377	1.91418	-0.464996	2.37917	Resistant
PP-1	LN_EC50	MAP4	-3.60749	0.00586074	-0.623516	0.514069	-1.13758	Sensitive
PP-1	LN_EC50	UBE2H	-3.23529	0.0106924	-0.705865	0.500968	-1.20683	Sensitive
PP-1	LN_EC50	URM1	-2.80375	0.0350355	-0.719476	0.34555	-1.06503	Sensitive
PP-1	LN_EC50	RUNX2	2.86443	0.0216895	0.174334	-1.04505	1.21938	Resistant
PP-1	LN_EC50	JDP2	2.83479	0.0297972	0.990437	-0.325936	1.31637	Resistant
PP-1	LN_EC50	CO057	-9.70913	0.0357259	-1.30243	0.508406	-1.81083	Sensitive
PP-1	LN_EC50	ZDHC7	-3.65501	0.0355779	-0.521832	1.00328	-1.52512	Sensitive
PP-1	LN_EC50	UFM1	-3.18723	0.0142985	-0.603882	0.55641	-1.16029	Sensitive
PP-1	LN_EC50	LEG9C	2.81927	0.03811	1.68141	-0.551025	2.23244	Resistant
PP-1	LN_EC50	FBX50	10.9636	0.0113539	2.17995	0.0424047	2.13754	Resistant
PP-1	LN_EC50	GTSF1	20.9395	0.000139382	3.79828	-0.750964	4.54924	Resistant
PP-1	LN_EC50	IL1RA	2.99697	0.0488731	1.50754	-0.840546	2.34809	Resistant
PP-1	LN_EC50	CATH	3.50084	0.00791291	1.61184	-1.43148	3.04333	Resistant
PP-1	LN_EC50	NRAM2	3.22962	0.0225535	0.799563	-0.376316	1.17588	Resistant
PP-1	LN_EC50	4EBP2	-3.28501	0.0384311	-0.634517	0.474839	-1.10936	Sensitive
PP-1	LN_EC50	ATOX1	-2.31941	0.0499349	-0.590642	0.865534	-1.45618	Sensitive
PP-1	LN_EC50	MOC2A	-3.0676	0.020157	-1.11496	0.777695	-1.89265	Sensitive
PP-1	LN_EC50	VP37A	-3.9371	0.00368871	-0.551117	0.601857	-1.15297	Sensitive
PP-1	LN_EC50	S35F2	3.00481	0.030143	0.801415	-0.714011	1.51543	Resistant
PP-1	LN_EC50	COR2A	6.04171	0.000234464	1.00039	-0.747497	1.74789	Resistant
PP-1	LN_EC50	ZN362	4.10928	0.00635546	0.496819	-0.649694	1.14651	Resistant
PP-1	LN_EC50	KI18B	3.82698	0.00433462	0.73308	-0.682337	1.41542	Resistant
PP-1	LN_EC50	KLF5	3.57192	0.00844437	1.67581	-0.867162	2.54297	Resistant
PP-1	LN_EC50	PXK	-3.60394	0.0181613	-1.14688	0.0282802	-1.17516	Sensitive
PP-1	LN_EC50	PEMT	5.09598	0.0285271	0.692544	-0.323157	1.0157	Resistant

## Sheet: PP-2
PP-2 mRNA and protein concordant sensitivity results			The drug sensitivity results for PP-2 in mRNA level.										The drug sensitivity results for PP-2 in protein level.
Gene	Concordant Category		drugName	measure	Gene	t.statistic	p.value	mean(Resistant)	mean(Sensitive)	FC(R/S)	Category		drugName	measure	Gene	t.statistic	p.value	mean(Resistant)	mean(Sensitive)	FC(R-S)	Category
PALM	Sensitive		PP-2	EC50	CEACAM21	5.64762	0.0303424	0.124267	0.0142846	8.69941	Resistant		PP-2	EC50	MAGD1	2.68358	0.0448724	1.15534	-0.228547	1.38388	Resistant
			PP-2	EC50	STAB1	-11.244	0.0303248	0.0703239	0.500361	0.140546	Sensitive		PP-2	EC50	SHIP2	9.53954	0.000263373	0.845192	-1.60066	2.44585	Resistant
			PP-2	EC50	SLC38A5	-11.7218	0.0420237	0.201579	0.834967	0.241422	Sensitive		PP-2	EC50	TXLNG	6.23634	0.00921482	0.279932	-0.818802	1.09873	Resistant
			PP-2	EC50	NLRP2	-23.1917	0.00199623	0.217548	5.85335	0.0371663	Sensitive		PP-2	EC50	TXLNA	5.20539	0.00543204	0.664262	-0.783774	1.44804	Resistant
			PP-2	EC50	CDH10	-19.7214	0.0318925	0.00717764	3.16349	0.0022689	Sensitive		PP-2	EC50	EGLN1	3.3971	0.0328678	0.14571	-1.47805	1.62376	Resistant
			PP-2	EC50	SNAP91	-24.2721	0.0262136	0	0.157029	0	Sensitive		PP-2	EC50	AL1B1	-3.19892	0.0403098	-1.13276	0.188147	-1.32091	Sensitive
			PP-2	EC50	LXN	4.79069	0.0445261	6.58675	0.980904	6.71498	Resistant		PP-2	EC50	STIP1	4.06773	0.0116412	0.0833196	-0.926818	1.01014	Resistant
			PP-2	EC50	COL5A3	7.63614	0.0204136	0.207771	0.0284998	7.29026	Resistant		PP-2	EC50	STMN1	3.37373	0.0280358	0.655803	-0.748962	1.40476	Resistant
			PP-2	EC50	CHRNA3	10.2435	0.0118005	0.627418	0.232334	2.7005	Resistant		PP-2	EC50	RIR2	2.82903	0.037789	0.966781	-0.33313	1.29991	Resistant
			PP-2	EC50	CHGB	-10.1808	0.0432137	0.0214622	0.27481	0.0780984	Sensitive		PP-2	EC50	SYNPO	-2.99514	0.0314793	-0.926234	0.162302	-1.08854	Sensitive
			PP-2	EC50	PALM	-1.31864	0.353441	0.797083	1.93722	0.411457	Sensitive		PP-2	EC50	XPO2	4.83643	0.0255497	0.822236	-0.632232	1.45447	Resistant
			PP-2	EC50	CA2	7.32535	0.01844	4.58255	0.618231	7.41236	Resistant		PP-2	EC50	FA65A	3.9698	0.0106939	0.484679	-0.571142	1.05582	Resistant
			PP-2	EC50	PON3	-4.74424	0.0420238	0.360358	2.42505	0.148598	Sensitive		PP-2	EC50	RN169	-4.60839	0.00722498	-0.190091	0.95124	-1.14133	Sensitive
			PP-2	EC50	TSPAN12	-13.9261	0.045315	0.448891	2.387	0.188057	Sensitive		PP-2	EC50	WBP2	5.2244	0.0146558	1.12716	-0.682404	1.80956	Resistant
			PP-2	EC50	RGS9	-6.97431	0.0370342	1.19856	4.31414	0.277821	Sensitive		PP-2	EC50	TSN31	4.60281	0.0138398	2.60346	-0.133964	2.73743	Resistant
			PP-2	EC50	JHY	-7.98355	0.0493819	0.916263	2.34211	0.391212	Sensitive		PP-2	EC50	A16A1	4.51115	0.00868711	1.19804	0.096939	1.1011	Resistant
			PP-2	EC50	AGMAT	11.5637	0.0492928	2.0418	0.731078	2.79286	Resistant		PP-2	EC50	LAMA3	-3.81158	0.0269983	-0.604629	1.24444	-1.84907	Sensitive
			PP-2	EC50	CD48	-4.77676	0.0493248	0.0425763	0.156913	0.271337	Sensitive		PP-2	EC50	S7A6O	5.43158	0.0309604	0.0744673	-1.14569	1.22016	Resistant
			PP-2	EC50	SLC8A2	-10.1625	0.0444574	0.0838074	1.08773	0.077048	Sensitive		PP-2	EC50	T22D2	3.45711	0.0192908	0.720282	-0.814168	1.53445	Resistant
			PP-2	EC50	KLF12	-27.4878	0.0201265	0.124085	0.859964	0.144291	Sensitive		PP-2	EC50	F263	2.61723	0.0474684	0.697297	-0.339632	1.03693	Resistant
			PP-2	EC50	PLXDC2	17.5893	0.0275666	3.00052	0.348665	8.60574	Resistant		PP-2	EC50	RTF2	7.06664	0.00177957	0.529667	-0.620076	1.14974	Resistant
			PP-2	EC50	PSG8	8.4771	0.0137699	0.0908375	0.00717764	12.6556	Resistant		PP-2	EC50	COQ5	-3.7251	0.0307117	-0.604499	0.418016	-1.02251	Sensitive
			PP-2	EC50	AP5S1	15.7661	0.0207751	4.24062	1.99743	2.12303	Resistant		PP-2	EC50	DYHC2	4.41526	0.0118958	0.566554	-0.531931	1.09848	Resistant
			PP-2	EC50	GNAI1	-8.06381	0.0383954	1.55094	3.78773	0.409465	Sensitive		PP-2	EC50	1433B	3.09082	0.0397044	0.609234	-0.611522	1.22076	Resistant
			PP-2	EC50	THAP10	11.2842	0.0395661	2.34252	0.726298	3.22528	Resistant		PP-2	EC50	LRSM1	3.16865	0.0459812	0.841789	-0.470217	1.31201	Resistant
			PP-2	EC50	RPS4Y1	-21.6536	0.00370095	0.250911	0.713588	0.351618	Sensitive		PP-2	EC50	TCF20	-3.56669	0.0473742	-0.546571	0.686001	-1.23257	Sensitive
			PP-2	EC50	SYNE1	-14.5909	0.0110342	0.736114	2.48163	0.296626	Sensitive		PP-2	EC50	DEOC	5.78898	0.00227907	1.36922	-0.387973	1.75719	Resistant
			PP-2	EC50	SERPINF1	-26.7852	0.00353932	1.78167	4.15547	0.428754	Sensitive		PP-2	EC50	K2013	-3.24765	0.0383748	-0.275948	0.900683	-1.17663	Sensitive
			PP-2	EC50	JCHAIN	-8.43919	0.0366234	0.0213222	0.458659	0.0464881	Sensitive		PP-2	EC50	TMA7	5.76211	0.0119819	0.897784	-1.38608	2.28387	Resistant
			PP-2	EC50	LRRIQ1	-12.3726	0.0418184	0.0284998	0.874231	0.0325999	Sensitive		PP-2	EC50	TOM34	4.54538	0.0110674	0.416701	-1.02599	1.44269	Resistant
			PP-2	EC50	CIDEB	14.231	0.0201151	0.855197	0.117557	7.27473	Resistant		PP-2	EC50	CHM4B	8.81713	0.00275467	0.596697	-0.586293	1.18299	Resistant
			PP-2	EC50	HLX	-6.2022	0.0261403	0.0698002	0.458659	0.152183	Sensitive		PP-2	EC50	GNAI3	-4.49687	0.0107812	-0.406811	0.714438	-1.12125	Sensitive
			PP-2	EC50	CASQ1	-11.0635	0.0364972	0.123356	0.739745	0.166755	Sensitive		PP-2	EC50	NOL12	-5.43376	0.003412	-0.728006	0.479015	-1.20702	Sensitive
			PP-2	EC50	ZNF214	-8.14575	0.0147424	0.131517	1.65382	0.0795231	Sensitive		PP-2	EC50	K1143	3.37164	0.0204692	0.248983	-1.19545	1.44443	Resistant
			PP-2	EC50	SLX4IP	9.66445	0.0172888	2.48225	1.00123	2.47921	Resistant		PP-2	EC50	NFXL1	-4.05282	0.0143603	-0.430664	0.622078	-1.05274	Sensitive
			PP-2	EC50	GPHA2	33.2849	0.0191206	0.207879	0	Inf	Resistant		PP-2	EC50	ZN706	3.67339	0.016565	0.39794	-0.674311	1.07225	Resistant
			PP-2	EC50	CATSPER3	18.7624	0.0281429	0.778202	0.34465	2.25795	Resistant		PP-2	EC50	THIM	-2.65094	0.049505	-0.8307	0.346188	-1.17689	Sensitive
			PP-2	EC50	DIPK1A	-8.30572	0.0144587	1.10082	2.24037	0.491356	Sensitive		PP-2	EC50	NAA40	7.29906	0.0141403	0.316614	-0.796029	1.11264	Resistant
			PP-2	EC50	CHODL	5.65452	0.0299798	0.0908375	0.0356067	2.55113	Resistant		PP-2	EC50	RECQ1	3.5956	0.0156475	0.699963	-0.649574	1.34954	Resistant
			PP-2	EC50	FGF18	6.9976	0.0240676	1.18332	0.184524	6.41284	Resistant		PP-2	EC50	CLCN2	-7.96333	0.0153205	-0.300166	1.13505	-1.43522	Sensitive
			PP-2	EC50	TMSB15A	-14.0134	0.0246028	0.539988	1.35319	0.399049	Sensitive		PP-2	EC50	RNF25	3.68087	0.0301066	0.472128	-0.735156	1.20728	Resistant
			PP-2	EC50	SHROOM4	-14.6757	0.0382023	0.00717764	0.677367	0.0105964	Sensitive		PP-2	EC50	IPYR	2.69401	0.0430969	0.453668	-0.56805	1.02172	Resistant
			PP-2	EC50	CELF5	-5.6289	0.0304792	0.472054	1.24444	0.379332	Sensitive		PP-2	EC50	S27A3	-3.62022	0.0350699	-1.22765	1.98414	-3.21179	Sensitive
			PP-2	EC50	SHANK1	-4.57867	0.045694	0.0563167	0.226298	0.248861	Sensitive		PP-2	EC50	GPTC2	4.45414	0.0121144	1.17025	-0.0823074	1.25256	Resistant
			PP-2	EC50	EDIL3	-4.75058	0.0439242	0.407132	2.20385	0.184737	Sensitive		PP-2	EC50	NFIX	-3.72993	0.0272732	0.087874	2.02706	-1.93918	Sensitive
			PP-2	EC50	CALHM4	5.65443	0.0299846	0.0634864	0.00717764	8.84502	Resistant		PP-2	EC50	1A25	-2.86043	0.0422553	-1.76649	1.14395	-2.91045	Sensitive
			PP-2	EC50	IQUB	-4.9392	0.0389125	0.0759294	0.519569	0.146139	Sensitive		PP-2	EC50	1C15	-3.29807	0.0435258	-0.369623	1.71114	-2.08076	Sensitive
			PP-2	EC50	PGAM2	-4.79754	0.0428738	0.0752798	0.549479	0.137002	Sensitive		PP-2	EC50	1C02	-5.25824	0.0301931	-2.89436	1.55738	-4.45174	Sensitive
			PP-2	EC50	WDR72	-10.5643	0.0420249	0.0687518	2.66339	0.0258136	Sensitive		PP-2	EC50	HLAF	-8.62239	0.00314031	-0.545717	1.5593	-2.10502	Sensitive
			PP-2	EC50	ACSM1	-8.71096	0.0490268	0.0904558	0.400497	0.225859	Sensitive		PP-2	EC50	CIP4	2.90318	0.0343069	0.536513	-0.537221	1.07373	Resistant
			PP-2	EC50	PROCA1	8.34781	0.0141545	2.23051	0.742688	3.00329	Resistant		PP-2	EC50	BRWD1	-4.60492	0.00922107	-0.248631	0.937586	-1.18622	Sensitive
			PP-2	EC50	NSG1	-44.1336	0.00242127	0.0356067	0.700378	0.0508393	Sensitive		PP-2	EC50	SPDLY	3.24373	0.0357268	0.949124	-0.226104	1.17523	Resistant
			PP-2	EC50	SCN9A	-8.84866	0.0241196	0.0354694	0.250911	0.141363	Sensitive		PP-2	EC50	STRAP	14.4041	0.000304982	0.617586	-0.670013	1.2876	Resistant
			PP-2	EC50	TACR3	-9.55982	0.0109863	0.0213222	0.321743	0.0662707	Sensitive		PP-2	EC50	AKTS1	3.50458	0.0174672	0.519451	-0.516778	1.03623	Resistant
			PP-2	EC50	PAQR8	-7.49496	0.0211262	0.161426	1.12399	0.143618	Sensitive		PP-2	EC50	SERPH	-3.68824	0.0273931	-0.216716	0.846686	-1.0634	Sensitive
			PP-2	EC50	PYGO1	-38.9086	0.00772064	0.0284998	0.608801	0.046813	Sensitive		PP-2	EC50	B2L13	-10.2474	0.000852601	-0.744027	0.78766	-1.53169	Sensitive
			PP-2	EC50	KRT20	11.6086	0.0089579	0.859044	0.0970435	8.85215	Resistant		PP-2	EC50	BGH3	-4.32527	0.0114001	-1.19905	0.603976	-1.80302	Sensitive
			PP-2	EC50	MAP6	-26.5772	0.00186144	0.0701276	0.999838	0.070139	Sensitive		PP-2	EC50	RAB3I	5.18057	0.0102136	1.72644	-1.32613	3.05257	Resistant
			PP-2	EC50	KRT2	1.10474	0.465019	3.68109	0.825153	4.4611	Resistant		PP-2	EC50	CO6A2	-3.56828	0.0174817	-0.791059	0.561701	-1.35276	Sensitive
			PP-2	EC50	MUC13	-4.92182	0.0497879	0.0633543	0.244566	0.259048	Sensitive		PP-2	EC50	H3BRJ5	-3.47749	0.0453902	-0.0932704	1.04407	-1.13734	Sensitive
			PP-2	EC50	BET1L	8.78656	0.0429792	4.50233	0.557117	8.08148	Resistant		PP-2	EC50	HSP71	-2.91196	0.0384112	0.360519	1.37898	-1.01846	Sensitive
			PP-2	EC50	RIC8A	19.8778	0.0142751	5.69138	0.537937	10.58	Resistant		PP-2	EC50	HS71L	-4.17672	0.0200208	-0.450356	0.583351	-1.03371	Sensitive
			PP-2	EC50	GLIPR1L2	9.36384	0.0223751	0.262984	0.0354694	7.4144	Resistant		PP-2	EC50	RUSD3	-3.2415	0.0465329	-0.513479	0.697327	-1.21081	Sensitive
			PP-2	EC50	ZNF572	16.7388	0.0372567	1.98077	0.0214622	92.2912	Resistant		PP-2	EC50	DEMA	-4.79039	0.0305333	-0.937296	0.286076	-1.22337	Sensitive
			PP-2	EC50	GLTPD2	11.5819	0.0109544	0.748231	0.226034	3.31026	Resistant		PP-2	EC50	JAG2	-6.4232	0.0142991	-0.00211752	1.95403	-1.95615	Sensitive
			PP-2	EC50	TP53TG3	-5.35651	0.0346219	0.137504	1.26328	0.108846	Sensitive		PP-2	EC50	XPP3	-3.34164	0.0336313	-0.105408	0.936143	-1.04155	Sensitive
			PP-2	EC50	FAM186A	5.345	0.0402982	0.195224	0.0703239	2.77607	Resistant		PP-2	EC50	T131L	-33.3599	0.0113298	-0.34579	0.893351	-1.23914	Sensitive
			PP-2	EC50	ZNF284	-15.7383	0.00430658	0.584674	1.18881	0.491814	Sensitive		PP-2	EC50	NOA1	-4.14977	0.00986911	-0.226246	0.805938	-1.03218	Sensitive
			PP-2	EC50	HPDL	7.1658	0.021571	3.49401	1.66482	2.09873	Resistant		PP-2	EC50	PIPNA	5.76076	0.0194937	0.388465	-1.12499	1.51345	Resistant
			PP-2	EC50	C1QL4	-21.7702	0.00215385	0.226034	1.32728	0.170299	Sensitive		PP-2	EC50	UBE2T	9.25918	0.000555946	1.27863	-0.681629	1.96026	Resistant
			PP-2	EC50	TMEM232	-6.57069	0.023265	0.0770972	0.256897	0.300109	Sensitive		PP-2	EC50	PRDX1	3.49445	0.0313633	0.421904	-0.84325	1.26515	Resistant
			PP-2	EC50	OR2AG2	-17.7005	0.0359281	0	0.11768	0	Sensitive		PP-2	EC50	WNK1	3.69687	0.0156908	0.638328	-0.407628	1.04596	Resistant
			PP-2	EC50	FHIT	11.8956	0.0464993	2.59299	0.361146	7.17991	Resistant		PP-2	EC50	M0QXA7	-3.41464	0.024359	-0.389651	0.979496	-1.36915	Sensitive
			PP-2	EC50	CPNE4	5.34747	0.0401271	0.143913	0.0142846	10.0747	Resistant		PP-2	EC50	RASF2	6.55828	0.00879062	-0.653683	-1.73276	1.07908	Resistant
			PP-2	EC50	NUDT11	-6.42128	0.0253081	0.122139	0.919052	0.132897	Sensitive		PP-2	EC50	NEMO	3.4215	0.0363616	0.907079	-0.588038	1.49512	Resistant
			PP-2	EC50	PGAP1	-5.95439	0.0387927	1.15122	2.58046	0.446129	Sensitive		PP-2	EC50	SPSY	4.3737	0.0115513	0.910629	-1.22275	2.13338	Resistant
			PP-2	EC50	TTC30A	-9.97	0.0241531	1.09984	2.35042	0.467935	Sensitive		PP-2	EC50	SQRD	-4.80955	0.00506305	-0.231732	2.00517	-2.23691	Sensitive
			PP-2	EC50	DMBX1	-4.30729	0.0499765	0.428791	1.424	0.301118	Sensitive		PP-2	EC50	PUS3	5.82128	0.0180791	0.409543	-0.744451	1.15399	Resistant
			PP-2	EC50	XAGE1A	-15.1672	0.0419127	0.275007	7.97058	0.0345028	Sensitive		PP-2	EC50	NF2IP	2.79904	0.0487889	0.814882	-0.341768	1.15665	Resistant
			PP-2	EC50	SLC44A4	-32.1685	0.00118272	0.0908375	0.372941	0.243571	Sensitive		PP-2	EC50	EHD3	4.73592	0.00563007	0.802234	-0.738852	1.54109	Resistant
			PP-2	EC50	CBY3	6.82922	0.0400783	0.367198	0.0420321	8.73612	Resistant		PP-2	EC50	EHD1	6.91183	0.00250645	1.16293	-0.496617	1.65955	Resistant
			PP-2	EC50	PLPP6	6.36124	0.0247285	3.21836	1.54733	2.07994	Resistant		PP-2	EC50	NCS1	5.75225	0.00230979	0.532759	-0.74739	1.28015	Resistant
			PP-2	EC50	UBE2QL1	42.6078	0.00259298	0.664418	0.00717764	92.5677	Resistant		PP-2	EC50	ROCK1	4.01465	0.010638	0.421546	-0.882329	1.30387	Resistant
			PP-2	EC50	HMX1	-7.85788	0.0160034	0.0881614	1.10127	0.0800542	Sensitive		PP-2	EC50	TIF1A	-9.50138	0.0014874	-0.473596	0.548439	-1.02204	Sensitive
			PP-2	EC50	GTF2A1L	-15.5465	0.040893	0	0.104321	0	Sensitive		PP-2	EC50	TMM51	-3.71081	0.02655	-0.898748	0.637948	-1.5367	Sensitive
			PP-2	EC50	C4orf48	5.8705	0.0290499	4.60204	1.87629	2.45274	Resistant		PP-2	EC50	CAN2	2.93882	0.036366	1.22679	-1.60356	2.83035	Resistant
			PP-2	EC50	ACTN3	-17.6937	0.0359418	0.0143553	0.130916	0.109653	Sensitive		PP-2	EC50	PAPS2	4.30834	0.00768521	1.49244	-0.97114	2.46358	Resistant
			PP-2	EC50	LRRC24	6.28988	0.0418962	2.13951	0.677395	3.15843	Resistant		PP-2	EC50	AR6P4	3.78267	0.0311373	0.155117	-1.34626	1.50137	Resistant
			PP-2	EC50	GFY	-26.4988	0.0240131	0	0.169911	0	Sensitive		PP-2	EC50	FKBP4	3.2163	0.0370333	1.26664	-0.385749	1.65239	Resistant
			PP-2	EC50	FAM72C	-5.11	0.0381617	0.594707	2.65464	0.224025	Sensitive		PP-2	EC50	SARG	-3.82057	0.0282925	-1.69224	0.591853	-2.2841	Sensitive
			PP-2	EC50	FXYD1	-4.40494	0.048582	0.297274	2.07054	0.143574	Sensitive		PP-2	EC50	SLK	4.25219	0.0280227	0.316733	-1.23077	1.5475	Resistant
			PP-2	EC50	CTAGE15	-9.87232	0.039794	0.254164	1.20129	0.211575	Sensitive		PP-2	EC50	RMD3	-5.21155	0.00460157	-0.348278	0.747755	-1.09603	Sensitive
			PP-2	EC50	PCDHGB5	5.53227	0.0312405	3.02688	0.516756	5.85747	Resistant		PP-2	EC50	F204A	-7.17694	0.0358493	-0.701646	0.918659	-1.6203	Sensitive
			PP-2	LN_EC50	CEACAM21	5.64762	0.0303424	0.124267	0.0142846	8.69941	Resistant		PP-2	EC50	GDIR1	4.42028	0.00692054	0.831015	-0.574672	1.40569	Resistant
			PP-2	LN_EC50	STAB1	-11.244	0.0303248	0.0703239	0.500361	0.140546	Sensitive		PP-2	EC50	ACADS	-3.35726	0.0224054	-1.71505	0.350768	-2.06582	Sensitive
			PP-2	LN_EC50	SLC38A5	-11.7218	0.0420237	0.201579	0.834967	0.241422	Sensitive		PP-2	EC50	H0Y2W2	-3.73509	0.0147147	-0.729084	0.54373	-1.27281	Sensitive
			PP-2	LN_EC50	NLRP2	-23.1917	0.00199623	0.217548	5.85335	0.0371663	Sensitive		PP-2	EC50	PUR9	2.95589	0.0491557	0.27966	-0.801424	1.08108	Resistant
			PP-2	LN_EC50	CDH10	-19.7214	0.0318925	0.00717764	3.16349	0.0022689	Sensitive		PP-2	EC50	LZTL1	4.97091	0.00450844	0.263078	-0.854966	1.11804	Resistant
			PP-2	LN_EC50	SNAP91	-24.2721	0.0262136	0	0.157029	0	Sensitive		PP-2	EC50	GCSP	2.86284	0.0374755	0.244225	-1.28746	1.53168	Resistant
			PP-2	LN_EC50	LXN	4.79069	0.0445261	6.58675	0.980904	6.71498	Resistant		PP-2	EC50	SKT	-5.88386	0.00381866	-0.343129	1.61129	-1.95442	Sensitive
			PP-2	LN_EC50	COL5A3	7.63614	0.0204136	0.207771	0.0284998	7.29026	Resistant		PP-2	EC50	TPD54	4.18855	0.00874625	0.367869	-0.741865	1.10973	Resistant
			PP-2	LN_EC50	CHRNA3	10.2435	0.0118005	0.627418	0.232334	2.7005	Resistant		PP-2	EC50	HABP4	3.73896	0.0141863	0.454559	-1.64973	2.10429	Resistant
			PP-2	LN_EC50	CHGB	-10.1808	0.0432137	0.0214622	0.27481	0.0780984	Sensitive		PP-2	EC50	CHRD1	5.50896	0.00557795	0.281039	-0.953796	1.23483	Resistant
			PP-2	LN_EC50	PALM	-1.31864	0.353441	0.797083	1.93722	0.411457	Sensitive		PP-2	EC50	SIGIR	-5.52951	0.00272058	-0.379426	2.19282	-2.57225	Sensitive
			PP-2	LN_EC50	CA2	7.32535	0.01844	4.58255	0.618231	7.41236	Resistant		PP-2	EC50	LRRF1	3.63733	0.0381179	0.25578	-0.779108	1.03489	Resistant
			PP-2	LN_EC50	PON3	-4.74424	0.0420238	0.360358	2.42505	0.148598	Sensitive		PP-2	EC50	ACPH	5.14029	0.0233724	0.871126	-1.06439	1.93552	Resistant
			PP-2	LN_EC50	TSPAN12	-13.9261	0.045315	0.448891	2.387	0.188057	Sensitive		PP-2	EC50	MTAP	4.71407	0.0380838	0.320082	-1.30951	1.62959	Resistant
			PP-2	LN_EC50	RGS9	-6.97431	0.0370342	1.19856	4.31414	0.277821	Sensitive		PP-2	EC50	RHG04	3.74302	0.0229223	0.359191	-1.08258	1.44177	Resistant
			PP-2	LN_EC50	JHY	-7.98355	0.0493819	0.916263	2.34211	0.391212	Sensitive		PP-2	EC50	ADPPT	6.03932	0.0147588	0.265955	-1.08189	1.34785	Resistant
			PP-2	LN_EC50	AGMAT	11.5637	0.0492928	2.0418	0.731078	2.79286	Resistant		PP-2	EC50	SCRIB	-4.55506	0.0120037	-0.361762	0.901406	-1.26317	Sensitive
			PP-2	LN_EC50	CD48	-4.77676	0.0493248	0.0425763	0.156913	0.271337	Sensitive		PP-2	EC50	CD36	5.03866	0.022715	0.40348	-0.932157	1.33564	Resistant
			PP-2	LN_EC50	SLC8A2	-10.1625	0.0444574	0.0838074	1.08773	0.077048	Sensitive		PP-2	EC50	TRI18	2.98602	0.0307889	1.38581	-0.81313	2.19894	Resistant
			PP-2	LN_EC50	KLF12	-27.4878	0.0201265	0.124085	0.859964	0.144291	Sensitive		PP-2	EC50	ACY1	3.41803	0.0190311	0.142395	-1.31565	1.45805	Resistant
			PP-2	LN_EC50	PLXDC2	17.5893	0.0275666	3.00052	0.348665	8.60574	Resistant		PP-2	EC50	FADS2	-4.19496	0.00900827	-0.69824	1.66035	-2.35859	Sensitive
			PP-2	LN_EC50	PSG8	8.4771	0.0137699	0.0908375	0.00717764	12.6556	Resistant		PP-2	EC50	UB2V1	3.68275	0.03735	0.509173	-0.91539	1.42456	Resistant
			PP-2	LN_EC50	AP5S1	15.7661	0.0207751	4.24062	1.99743	2.12303	Resistant		PP-2	EC50	RHG18	3.44387	0.0368061	0.83663	-1.02612	1.86275	Resistant
			PP-2	LN_EC50	GNAI1	-8.06381	0.0383954	1.55094	3.78773	0.409465	Sensitive		PP-2	EC50	TFB1M	-4.06896	0.0186182	-0.738058	0.650952	-1.38901	Sensitive
			PP-2	LN_EC50	THAP10	11.2842	0.0395661	2.34252	0.726298	3.22528	Resistant		PP-2	EC50	SPC25	3.80176	0.0242964	0.836337	-0.277664	1.114	Resistant
			PP-2	LN_EC50	RPS4Y1	-21.6536	0.00370095	0.250911	0.713588	0.351618	Sensitive		PP-2	EC50	TOPK	3.86285	0.0378338	0.973129	-0.987441	1.96057	Resistant
			PP-2	LN_EC50	SYNE1	-14.5909	0.0110342	0.736114	2.48163	0.296626	Sensitive		PP-2	EC50	PCDH7	-4.3457	0.0131466	-0.41968	2.13871	-2.55839	Sensitive
			PP-2	LN_EC50	SERPINF1	-26.7852	0.00353932	1.78167	4.15547	0.428754	Sensitive		PP-2	EC50	JCAD	-4.48295	0.0297537	-0.558775	0.55305	-1.11183	Sensitive
			PP-2	LN_EC50	JCHAIN	-8.43919	0.0366234	0.0213222	0.458659	0.0464881	Sensitive		PP-2	EC50	SNX15	4.97885	0.0082529	0.266136	-1.18896	1.4551	Resistant
			PP-2	LN_EC50	LRRIQ1	-12.3726	0.0418184	0.0284998	0.874231	0.0325999	Sensitive		PP-2	EC50	UBIA1	-6.3295	0.0146419	-0.192929	0.914909	-1.10784	Sensitive
			PP-2	LN_EC50	CIDEB	14.231	0.0201151	0.855197	0.117557	7.27473	Resistant		PP-2	EC50	STK4	4.47974	0.0189574	0.276129	-0.972605	1.24873	Resistant
			PP-2	LN_EC50	HLX	-6.2022	0.0261403	0.0698002	0.458659	0.152183	Sensitive		PP-2	EC50	CDK4	3.02754	0.0295218	2.04317	-0.634679	2.67785	Resistant
			PP-2	LN_EC50	CASQ1	-11.0635	0.0364972	0.123356	0.739745	0.166755	Sensitive		PP-2	EC50	CDK10	-3.49365	0.0408931	-0.793159	0.641588	-1.43475	Sensitive
			PP-2	LN_EC50	ZNF214	-8.14575	0.0147424	0.131517	1.65382	0.0795231	Sensitive		PP-2	EC50	SBNO1	5.17155	0.00439724	0.244129	-0.769833	1.01396	Resistant
			PP-2	LN_EC50	SLX4IP	9.66445	0.0172888	2.48225	1.00123	2.47921	Resistant		PP-2	EC50	PP16A	-3.95685	0.0398354	-0.0529216	1.26476	-1.31768	Sensitive
			PP-2	LN_EC50	GPHA2	33.2849	0.0191206	0.207879	0	Inf	Resistant		PP-2	EC50	SRXN1	4.11209	0.0207661	0.0976917	-1.032	1.12969	Resistant
			PP-2	LN_EC50	CATSPER3	18.7624	0.0281429	0.778202	0.34465	2.25795	Resistant		PP-2	EC50	DAP1	3.71664	0.0162147	1.01214	-1.02054	2.03268	Resistant
			PP-2	LN_EC50	DIPK1A	-8.30572	0.0144587	1.10082	2.24037	0.491356	Sensitive		PP-2	EC50	H2A2A	-5.29938	0.0425332	-0.637782	1.15218	-1.78996	Sensitive
			PP-2	LN_EC50	CHODL	5.65452	0.0299798	0.0908375	0.0356067	2.55113	Resistant		PP-2	EC50	NMNA1	-2.69079	0.0463376	-1.0138	0.422752	-1.43655	Sensitive
			PP-2	LN_EC50	FGF18	6.9976	0.0240676	1.18332	0.184524	6.41284	Resistant		PP-2	EC50	MARE3	3.7006	0.0277716	0.57724	-0.445676	1.02292	Resistant
			PP-2	LN_EC50	TMSB15A	-14.0134	0.0246028	0.539988	1.35319	0.399049	Sensitive		PP-2	EC50	CNN2	3.62998	0.0197896	0.377623	-0.787705	1.16533	Resistant
			PP-2	LN_EC50	SHROOM4	-14.6757	0.0382023	0.00717764	0.677367	0.0105964	Sensitive		PP-2	EC50	IRF3	3.54973	0.0177149	1.04522	-0.141035	1.18625	Resistant
			PP-2	LN_EC50	CELF5	-5.6289	0.0304792	0.472054	1.24444	0.379332	Sensitive		PP-2	EC50	PSMG1	2.88499	0.0498146	0.275825	-0.855854	1.13168	Resistant
			PP-2	LN_EC50	SHANK1	-4.57867	0.045694	0.0563167	0.226298	0.248861	Sensitive		PP-2	EC50	SUSD2	-3.50011	0.0262576	-0.347104	2.13789	-2.485	Sensitive
			PP-2	LN_EC50	EDIL3	-4.75058	0.0439242	0.407132	2.20385	0.184737	Sensitive		PP-2	EC50	SLPI	-4.53936	0.0340839	-2.66291	1.31516	-3.97807	Sensitive
			PP-2	LN_EC50	CALHM4	5.65443	0.0299846	0.0634864	0.00717764	8.84502	Resistant		PP-2	EC50	ZPR1	5.90776	0.00740294	0.611643	-1.2557	1.86734	Resistant
			PP-2	LN_EC50	IQUB	-4.9392	0.0389125	0.0759294	0.519569	0.146139	Sensitive		PP-2	EC50	PCY2	4.32034	0.00762699	0.674147	-0.705535	1.37968	Resistant
			PP-2	LN_EC50	PGAM2	-4.79754	0.0428738	0.0752798	0.549479	0.137002	Sensitive		PP-2	EC50	PURA2	3.05001	0.0284257	0.649344	-0.395383	1.04473	Resistant
			PP-2	LN_EC50	WDR72	-10.5643	0.0420249	0.0687518	2.66339	0.0258136	Sensitive		PP-2	EC50	UB2G1	3.79714	0.0224273	-0.0598421	-1.06792	1.00808	Resistant
			PP-2	LN_EC50	ACSM1	-8.71096	0.0490268	0.0904558	0.400497	0.225859	Sensitive		PP-2	EC50	ZNHI2	6.68048	0.00284045	0.273077	-0.732575	1.00565	Resistant
			PP-2	LN_EC50	PROCA1	8.34781	0.0141545	2.23051	0.742688	3.00329	Resistant		PP-2	EC50	SIR5	-3.62558	0.0487625	-0.618129	0.466525	-1.08465	Sensitive
			PP-2	LN_EC50	NSG1	-44.1336	0.00242127	0.0356067	0.700378	0.0508393	Sensitive		PP-2	EC50	PCKGM	-3.13593	0.0310974	-0.581251	0.531124	-1.11238	Sensitive
			PP-2	LN_EC50	SCN9A	-8.84866	0.0241196	0.0354694	0.250911	0.141363	Sensitive		PP-2	EC50	SCRN1	3.99022	0.0104244	0.958681	-1.13435	2.09303	Resistant
			PP-2	LN_EC50	TACR3	-9.55982	0.0109863	0.0213222	0.321743	0.0662707	Sensitive		PP-2	EC50	FAKD1	-2.89935	0.0393028	-0.912771	0.145069	-1.05784	Sensitive
			PP-2	LN_EC50	PAQR8	-7.49496	0.0211262	0.161426	1.12399	0.143618	Sensitive		PP-2	EC50	TTPAL	3.6396	0.0409985	0.596001	-0.647863	1.24386	Resistant
			PP-2	LN_EC50	PYGO1	-38.9086	0.00772064	0.0284998	0.608801	0.046813	Sensitive		PP-2	EC50	HEM3	4.61269	0.0252405	0.185617	-1.08393	1.26955	Resistant
			PP-2	LN_EC50	KRT20	11.6086	0.0089579	0.859044	0.0970435	8.85215	Resistant		PP-2	EC50	PPAC	3.60767	0.0232126	0.285251	-1.17983	1.46509	Resistant
			PP-2	LN_EC50	MAP6	-26.5772	0.00186144	0.0701276	0.999838	0.070139	Sensitive		PP-2	EC50	C1R	-5.02119	0.0362171	-1.409	1.60715	-3.01615	Sensitive
			PP-2	LN_EC50	KRT2	1.10474	0.465019	3.68109	0.825153	4.4611	Resistant		PP-2	EC50	FA50A	8.60666	0.000464392	0.371621	-1.08829	1.45992	Resistant
			PP-2	LN_EC50	MUC13	-4.92182	0.0497879	0.0633543	0.244566	0.259048	Sensitive		PP-2	EC50	SAAL1	3.2829	0.0225245	0.307034	-0.753074	1.06011	Resistant
			PP-2	LN_EC50	BET1L	8.78656	0.0429792	4.50233	0.557117	8.08148	Resistant		PP-2	EC50	SH3L3	2.9961	0.0302345	0.137842	-1.31923	1.45708	Resistant
			PP-2	LN_EC50	RIC8A	19.8778	0.0142751	5.69138	0.537937	10.58	Resistant		PP-2	EC50	IMDH2	3.79378	0.0174271	0.737011	-0.590081	1.32709	Resistant
			PP-2	LN_EC50	GLIPR1L2	9.36384	0.0223751	0.262984	0.0354694	7.4144	Resistant		PP-2	EC50	SENP1	-10.555	0.000664529	-0.522411	0.484076	-1.00649	Sensitive
			PP-2	LN_EC50	ZNF572	16.7388	0.0372567	1.98077	0.0214622	92.2912	Resistant		PP-2	EC50	PNKD	-4.1373	0.0151026	-0.556164	0.809015	-1.36518	Sensitive
			PP-2	LN_EC50	GLTPD2	11.5819	0.0109544	0.748231	0.226034	3.31026	Resistant		PP-2	EC50	ORN	3.61246	0.0172573	0.727556	-1.19817	1.92573	Resistant
			PP-2	LN_EC50	TP53TG3	-5.35651	0.0346219	0.137504	1.26328	0.108846	Sensitive		PP-2	EC50	SYVM	-10.5142	0.000200158	-0.328366	0.866964	-1.19533	Sensitive
			PP-2	LN_EC50	FAM186A	5.345	0.0402982	0.195224	0.0703239	2.77607	Resistant		PP-2	EC50	TBCEL	4.1333	0.0270613	0.879028	-0.876458	1.75549	Resistant
			PP-2	LN_EC50	ZNF284	-15.7383	0.00430658	0.584674	1.18881	0.491814	Sensitive		PP-2	EC50	UN13D	4.0958	0.0120923	1.76917	0.157598	1.61157	Resistant
			PP-2	LN_EC50	HPDL	7.1658	0.021571	3.49401	1.66482	2.09873	Resistant		PP-2	EC50	GMPPB	2.92355	0.0444284	0.945713	-0.721549	1.66726	Resistant
			PP-2	LN_EC50	C1QL4	-21.7702	0.00215385	0.226034	1.32728	0.170299	Sensitive		PP-2	EC50	DHYS	3.45887	0.020872	0.378343	-0.703983	1.08233	Resistant
			PP-2	LN_EC50	TMEM232	-6.57069	0.023265	0.0770972	0.256897	0.300109	Sensitive		PP-2	EC50	TUSC1	29.565	0.00233131	0.450805	-0.549678	1.00048	Resistant
			PP-2	LN_EC50	OR2AG2	-17.7005	0.0359281	0	0.11768	0	Sensitive		PP-2	EC50	PGAM1	3.13721	0.0307422	0.28105	-0.894179	1.17523	Resistant
			PP-2	LN_EC50	FHIT	11.8956	0.0464993	2.59299	0.361146	7.17991	Resistant		PP-2	EC50	NOSIP	2.89328	0.0495557	0.679783	-0.477789	1.15757	Resistant
			PP-2	LN_EC50	CPNE4	5.34747	0.0401271	0.143913	0.0142846	10.0747	Resistant		PP-2	EC50	CHM1A	4.67254	0.0347678	0.927907	-0.72031	1.64822	Resistant
			PP-2	LN_EC50	NUDT11	-6.42128	0.0253081	0.122139	0.919052	0.132897	Sensitive		PP-2	EC50	PROF2	2.93961	0.0473592	0.755889	-0.535838	1.29173	Resistant
			PP-2	LN_EC50	PGAP1	-5.95439	0.0387927	1.15122	2.58046	0.446129	Sensitive		PP-2	EC50	PROF2	4.31726	0.0132827	1.04741	-1.38148	2.42889	Resistant
			PP-2	LN_EC50	TTC30A	-9.97	0.0241531	1.09984	2.35042	0.467935	Sensitive		PP-2	EC50	RAD1	4.12682	0.0106088	0.562616	-0.601314	1.16393	Resistant
			PP-2	LN_EC50	DMBX1	-4.30729	0.0499765	0.428791	1.424	0.301118	Sensitive		PP-2	EC50	CENPL	-3.47218	0.0420476	-0.450035	0.721334	-1.17137	Sensitive
			PP-2	LN_EC50	XAGE1A	-15.1672	0.0419127	0.275007	7.97058	0.0345028	Sensitive		PP-2	EC50	PDDC1	3.039	0.0430577	0.47726	-0.715895	1.19315	Resistant
			PP-2	LN_EC50	SLC44A4	-32.1685	0.00118272	0.0908375	0.372941	0.243571	Sensitive		PP-2	EC50	PEG10	3.98857	0.0131799	0.632609	-1.38253	2.01514	Resistant
			PP-2	LN_EC50	CBY3	6.82922	0.0400783	0.367198	0.0420321	8.73612	Resistant		PP-2	EC50	CDC37	3.09363	0.0274976	0.480975	-0.53577	1.01675	Resistant
			PP-2	LN_EC50	PLPP6	6.36124	0.0247285	3.21836	1.54733	2.07994	Resistant		PP-2	EC50	PCDH1	-3.56202	0.0266852	-0.625909	1.21182	-1.83772	Sensitive
			PP-2	LN_EC50	UBE2QL1	42.6078	0.00259298	0.664418	0.00717764	92.5677	Resistant		PP-2	EC50	M1IP1	4.88498	0.00959928	0.483159	-0.997075	1.48023	Resistant
			PP-2	LN_EC50	HMX1	-7.85788	0.0160034	0.0881614	1.10127	0.0800542	Sensitive		PP-2	EC50	TBC13	3.96992	0.0285073	0.259196	-1.24746	1.50666	Resistant
			PP-2	LN_EC50	GTF2A1L	-15.5465	0.040893	0	0.104321	0	Sensitive		PP-2	EC50	CCD25	3.95759	0.0283623	0.297458	-0.938436	1.23589	Resistant
			PP-2	LN_EC50	C4orf48	5.8705	0.0290499	4.60204	1.87629	2.45274	Resistant		PP-2	EC50	CA052	5.34093	0.00993053	0.0641822	-0.994255	1.05844	Resistant
			PP-2	LN_EC50	ACTN3	-17.6937	0.0359418	0.0143553	0.130916	0.109653	Sensitive		PP-2	EC50	TXND9	5.91388	0.00359522	0.472835	-0.639864	1.1127	Resistant
			PP-2	LN_EC50	LRRC24	6.28988	0.0418962	2.13951	0.677395	3.15843	Resistant		PP-2	EC50	CPZIP	-2.75041	0.0461702	-1.27664	-0.191034	-1.08561	Sensitive
			PP-2	LN_EC50	GFY	-26.4988	0.0240131	0	0.169911	0	Sensitive		PP-2	EC50	CLIC3	3.71213	0.0167276	2.15288	-0.376221	2.5291	Resistant
			PP-2	LN_EC50	FAM72C	-5.11	0.0381617	0.594707	2.65464	0.224025	Sensitive		PP-2	EC50	UBP13	5.45627	0.00286497	0.679639	-0.84133	1.52097	Resistant
			PP-2	LN_EC50	FXYD1	-4.40494	0.048582	0.297274	2.07054	0.143574	Sensitive		PP-2	EC50	CAN1	4.99129	0.0049274	0.691878	-0.845858	1.53774	Resistant
			PP-2	LN_EC50	CTAGE15	-9.87232	0.039794	0.254164	1.20129	0.211575	Sensitive		PP-2	EC50	PP14B	3.74448	0.0160019	0.540715	-0.902316	1.44303	Resistant
			PP-2	LN_EC50	PCDHGB5	5.53227	0.0312405	3.02688	0.516756	5.85747	Resistant		PP-2	EC50	PEBP1	2.77336	0.0430412	0.507751	-1.0904	1.59815	Resistant
													PP-2	EC50	AAMP	8.54348	0.00134552	0.809047	-0.631311	1.44036	Resistant
													PP-2	EC50	GLRX1	6.54955	0.001313	0.110614	-1.67068	1.78129	Resistant
													PP-2	EC50	ELAF	-14.1438	0.0238225	-1.04482	0.0796942	-1.12451	Sensitive
													PP-2	EC50	NR3L1	3.60238	0.0471564	0.792894	-0.9327	1.72559	Resistant
													PP-2	EC50	CPNE1	13.8289	7.37978e-05	0.354345	-1.03824	1.39259	Resistant
													PP-2	EC50	TTC33	4.00783	0.0150631	-0.197037	-1.20184	1.0048	Resistant
													PP-2	EC50	RIR1	5.77702	0.0193578	1.1406	-1.02578	2.16638	Resistant
													PP-2	EC50	SEN34	7.27384	0.00351819	0.489621	-0.667022	1.15664	Resistant
													PP-2	EC50	OTUD5	3.51177	0.032891	0.303146	-0.794773	1.09792	Resistant
													PP-2	EC50	NECP1	3.11533	0.0275999	0.854465	-0.812755	1.66722	Resistant
													PP-2	EC50	K7EMX1	3.24233	0.0408881	0.690565	-0.521645	1.21221	Resistant
													PP-2	EC50	TKT	3.79599	0.0136878	0.236759	-1.13323	1.36998	Resistant
													PP-2	EC50	RFFL	-5.00655	0.00979416	-0.184956	0.936599	-1.12156	Sensitive
													PP-2	EC50	RGS10	3.55755	0.0326617	0.443894	-0.807465	1.25136	Resistant
													PP-2	EC50	SNX29	-3.23208	0.0328392	-0.320669	1.00742	-1.32809	Sensitive
													PP-2	EC50	ILKAP	3.70195	0.0220471	0.157008	-1.04102	1.19803	Resistant
													PP-2	EC50	UB2E1	2.66766	0.047018	0.26129	-1.10735	1.36864	Resistant
													PP-2	EC50	UB2E2	4.57666	0.0413888	0.365976	-0.895569	1.26154	Resistant
													PP-2	EC50	KT3K	3.0968	0.027404	0.915589	-0.577317	1.49291	Resistant
													PP-2	EC50	SHLB1	4.72496	0.0141979	0.401958	-0.940587	1.34254	Resistant
													PP-2	EC50	CUED1	2.96914	0.0432227	0.974321	-0.13544	1.10976	Resistant
													PP-2	EC50	CHK1	4.68845	0.0261032	0.709279	-0.673249	1.38253	Resistant
													PP-2	EC50	CD47	-3.04528	0.0369214	0.128346	1.21731	-1.08897	Sensitive
													PP-2	EC50	PDCD5	3.53207	0.0367903	0.400055	-1.17427	1.57433	Resistant
													PP-2	EC50	GALE	4.13326	0.00906023	0.482405	-0.542915	1.02532	Resistant
													PP-2	EC50	COF2	3.0457	0.0499592	0.24507	-1.68499	1.93006	Resistant
													PP-2	EC50	GMPPA	3.85463	0.0227615	0.645087	-0.71499	1.36008	Resistant
													PP-2	EC50	EXOG	-5.67612	0.0218159	-1.07324	0.23467	-1.30791	Sensitive
													PP-2	EC50	SLD5	2.89241	0.0340932	0.801232	-0.482177	1.28341	Resistant
													PP-2	EC50	TUSC2	6.3932	0.00574249	0.859452	-0.686844	1.5463	Resistant
													PP-2	EC50	POMP	4.22887	0.0266869	0.652251	-0.912562	1.56481	Resistant
													PP-2	EC50	WDR73	3.19032	0.0369665	0.602336	-1.08732	1.68966	Resistant
													PP-2	EC50	DNJC9	5.47534	0.00522901	0.24812	-0.761839	1.00996	Resistant
													PP-2	EC50	IF1AX	5.31449	0.0182897	0.285748	-0.954846	1.24059	Resistant
													PP-2	EC50	ADA	3.1444	0.0317175	0.503124	-1.45992	1.96305	Resistant
													PP-2	EC50	NB5R2	2.87308	0.0348879	1.26561	-0.561708	1.82732	Resistant
													PP-2	EC50	RPE	3.25889	0.0257124	0.266109	-0.784611	1.05072	Resistant
													PP-2	EC50	TSN15	-5.27955	0.00400266	-0.014391	1.34212	-1.35651	Sensitive
													PP-2	EC50	UBR7	2.72216	0.04463	0.447215	-0.768047	1.21526	Resistant
													PP-2	EC50	CC104	3.21861	0.0318696	0.623986	-0.63913	1.26312	Resistant
													PP-2	EC50	CD123	2.96796	0.0318432	0.733451	-0.498554	1.23201	Resistant
													PP-2	EC50	F122B	2.9122	0.0442118	0.733476	-1.21263	1.94611	Resistant
													PP-2	EC50	TPRA1	-4.78476	0.00922494	-0.347352	0.6527	-1.00005	Sensitive
													PP-2	EC50	RBX2	4.07253	0.0479432	0.376848	-0.932317	1.30916	Resistant
													PP-2	EC50	GILT	-4.97121	0.00732057	-0.805469	1.26039	-2.06586	Sensitive
													PP-2	EC50	FRS2	3.61455	0.0457313	2.90047	1.2159	1.68457	Resistant
													PP-2	EC50	PROF1	5.96366	0.00465331	0.213255	-0.908358	1.12161	Resistant
													PP-2	EC50	E9PNR5	-3.9293	0.017539	-1.09964	0.737504	-1.83714	Sensitive
													PP-2	EC50	SPAG7	3.15843	0.0301081	-0.0805399	-1.25727	1.17673	Resistant
													PP-2	EC50	RN114	3.74828	0.0185177	0.60552	-0.529773	1.13529	Resistant
													PP-2	EC50	TUFT1	3.0689	0.0309743	1.2708	-0.156488	1.42729	Resistant
													PP-2	EC50	ARF4	4.52162	0.00965212	0.261122	-0.81442	1.07554	Resistant
													PP-2	EC50	MND1	5.91668	0.00467513	0.48018	-0.954077	1.43426	Resistant
													PP-2	EC50	F118B	3.0937	0.0296462	0.227245	-1.28635	1.51359	Resistant
													PP-2	EC50	TCP4	3.23145	0.0368661	0.597549	-0.972049	1.5696	Resistant
													PP-2	EC50	CYLD	4.51153	0.0278182	0.463509	-0.937908	1.40142	Resistant
													PP-2	EC50	RBBP7	5.30563	0.0155906	0.408148	-0.86096	1.26911	Resistant
													PP-2	EC50	CHUR	4.69575	0.0255108	0.714883	-0.869895	1.58478	Resistant
													PP-2	EC50	PPME1	5.49831	0.0115164	0.704643	-1.10672	1.81136	Resistant
													PP-2	EC50	CO5A1	-3.58001	0.038594	-0.414174	0.954254	-1.36843	Sensitive
													PP-2	EC50	AT5G2	2.73903	0.044493	0.694093	-0.435514	1.12961	Resistant
													PP-2	EC50	E9PAV3	3.3925	0.0477535	0.255772	-0.834988	1.09076	Resistant
													PP-2	EC50	CDKAL	-2.83956	0.0469276	-0.187212	0.847863	-1.03507	Sensitive
													PP-2	EC50	MTND	3.76214	0.0310623	0.246971	-0.948712	1.19568	Resistant
													PP-2	EC50	VP26B	2.63537	0.046655	0.816848	-0.19541	1.01226	Resistant
													PP-2	EC50	NTM1A	3.15327	0.0422605	0.612949	-0.758864	1.37181	Resistant
													PP-2	EC50	I3L4Q0	4.7875	0.00497562	0.24034	-0.809702	1.05004	Resistant
													PP-2	EC50	8ODP	4.11631	0.0153385	0.396639	-0.65414	1.05078	Resistant
													PP-2	EC50	UBE2C	7.59664	0.00119926	1.41181	-0.66985	2.08166	Resistant
													PP-2	EC50	DCTD	2.93556	0.040669	0.0866392	-1.16378	1.25042	Resistant
													PP-2	EC50	CLU	4.53009	0.00870299	0.410958	-0.612722	1.02368	Resistant
													PP-2	EC50	I3L2B0	3.67936	0.0213559	0.574128	-0.602595	1.17672	Resistant
													PP-2	EC50	TM186	-4.66736	0.038747	-0.506809	0.518523	-1.02533	Sensitive
													PP-2	EC50	CE022	3.5489	0.0173993	0.477865	-0.854286	1.33215	Resistant
													PP-2	EC50	MOFA1	7.25572	0.0373054	0.909838	-0.405514	1.31535	Resistant
													PP-2	EC50	HN1	8.13115	0.000956783	1.10905	-0.621208	1.73026	Resistant
													PP-2	EC50	IF5A1	10.1416	0.000174473	0.163472	-0.836604	1.00008	Resistant
													PP-2	EC50	F107B	3.14469	0.0255357	0.471899	-0.660111	1.13201	Resistant
													PP-2	EC50	RWDD4	3.26134	0.0483471	0.766524	-0.760796	1.52732	Resistant
													PP-2	EC50	MAP4	2.84382	0.0466903	0.442791	-0.626212	1.069	Resistant
													PP-2	EC50	GLYG	5.56797	0.0156458	1.05787	-0.873211	1.93108	Resistant
													PP-2	EC50	LEG9	-5.64552	0.0432217	-1.79405	1.4243	-3.21835	Sensitive
													PP-2	EC50	ALG12	-3.78004	0.0326525	-0.324599	0.859	-1.1836	Sensitive
													PP-2	EC50	COQ7	-3.17836	0.0394754	-0.609353	0.604825	-1.21418	Sensitive
													PP-2	EC50	BAK	-3.27905	0.0239564	-0.276145	0.843359	-1.1195	Sensitive
													PP-2	EC50	CD003	4.80011	0.00489357	1.24372	0.111798	1.13192	Resistant
													PP-2	EC50	CPNS1	3.83892	0.014131	0.891844	-1.33156	2.2234	Resistant
													PP-2	EC50	PSF3	4.57171	0.00878082	0.481796	-0.662747	1.14454	Resistant
													PP-2	EC50	AFAD	-3.43707	0.0186205	-1.19173	0.662126	-1.85386	Sensitive
													PP-2	EC50	J3KN01	-3.57828	0.0160894	-1.44117	0.764855	-2.20602	Sensitive
													PP-2	EC50	PEMT	-8.80804	0.0127109	-0.451389	0.875351	-1.32674	Sensitive
													PP-2	IC50	CHLE	7.58244	0.0021244	0.221451	-0.982246	1.2037	Resistant
													PP-2	IC50	ADCK1	5.18998	0.0406459	0.587126	-0.462002	1.04913	Resistant
													PP-2	IC50	TACC1	2.43297	0.0461908	0.838502	-0.426689	1.26519	Resistant
													PP-2	IC50	P5CR1	4.14017	0.00677681	0.703394	-0.587517	1.29091	Resistant
													PP-2	IC50	NSD3	4.52947	0.00501663	0.908214	-0.436337	1.34455	Resistant
													PP-2	IC50	KI16B	3.60818	0.0377702	0.307189	-0.88744	1.19463	Resistant
													PP-2	IC50	TEN3	3.97056	0.0108238	1.30895	-0.682938	1.99189	Resistant
													PP-2	IC50	WBP2	2.92085	0.029649	1.12716	0.0597441	1.06741	Resistant
													PP-2	IC50	TSN31	3.30787	0.0134865	2.60346	-0.0449568	2.64842	Resistant
													PP-2	IC50	DEOC	3.50974	0.0108171	1.36922	0.199575	1.16964	Resistant
													PP-2	IC50	HMGN5	2.63194	0.0354087	1.22836	-1.06612	2.29447	Resistant
													PP-2	IC50	HELZ2	-5.31209	0.00210529	-0.298397	1.18316	-1.48155	Sensitive
													PP-2	IC50	LRP1B	-3.62489	0.020813	-0.571074	0.672857	-1.24393	Sensitive
													PP-2	IC50	MY18B	-3.85301	0.0312446	-0.348835	0.654909	-1.00374	Sensitive
													PP-2	IC50	TT39B	6.97939	0.0051056	1.96876	-0.0854072	2.05417	Resistant
													PP-2	IC50	DDX60	-3.20814	0.0250725	-0.665365	1.23341	-1.89878	Sensitive
													PP-2	IC50	IFIT3	-3.38454	0.0151591	-0.680645	2.31887	-2.99952	Sensitive
													PP-2	IC50	ATP23	3.26907	0.0206291	1.32862	-0.824348	2.15297	Resistant
													PP-2	IC50	CEBPD	-2.75935	0.0436643	-0.442453	0.673552	-1.116	Sensitive
													PP-2	IC50	GPTC2	3.32964	0.021221	1.17025	0.09603	1.07422	Resistant
													PP-2	IC50	D6RH06	-2.66935	0.0335371	-0.717872	0.824883	-1.54276	Sensitive
													PP-2	IC50	1A25	-2.6361	0.035504	-1.76649	1.30828	-3.07477	Sensitive
													PP-2	IC50	1B27	-3.83007	0.0208389	-1.19375	3.30544	-4.49919	Sensitive
													PP-2	IC50	1C07	-3.1231	0.0461383	-1.34059	1.08586	-2.42644	Sensitive
													PP-2	IC50	1C02	-2.95057	0.0406213	-2.89436	0.882211	-3.77657	Sensitive
													PP-2	IC50	PARP9	-2.81448	0.0292758	-0.587465	0.637858	-1.22532	Sensitive
													PP-2	IC50	IKZF4	-4.41358	0.0370846	-1.18969	-0.0193757	-1.17031	Sensitive
													PP-2	IC50	DTX3L	-4.04411	0.00530419	-0.634654	0.991818	-1.62647	Sensitive
													PP-2	IC50	KANK2	-3.3315	0.0138356	-0.645319	0.370284	-1.0156	Sensitive
													PP-2	IC50	RHG23	-4.78655	0.0312105	0.0305351	1.08901	-1.05848	Sensitive
													PP-2	IC50	G3V1L9	-3.29884	0.020019	-1.02129	0.234061	-1.25535	Sensitive
													PP-2	IC50	CAN5	-3.58917	0.0117443	-1.0122	0.0409643	-1.05316	Sensitive
													PP-2	IC50	DPOLB	3.73622	0.00911253	0.790499	-0.483958	1.27446	Resistant
													PP-2	IC50	RAB3I	2.86179	0.0371195	1.72644	-0.136161	1.8626	Resistant
													PP-2	IC50	FA84B	2.47778	0.0474867	1.37826	-0.0144235	1.39268	Resistant
													PP-2	IC50	COIA1	-3.27052	0.0272117	-0.563581	0.568673	-1.13225	Sensitive
													PP-2	IC50	HBD	-2.87169	0.0344541	-0.7751	0.293116	-1.06822	Sensitive
													PP-2	IC50	NAV2	-3.49189	0.0175602	-1.1947	1.47681	-2.67151	Sensitive
													PP-2	IC50	DDHD2	2.79054	0.0431384	1.17836	-0.155536	1.33389	Resistant
													PP-2	IC50	OASL	-3.66581	0.0181543	-0.700092	2.17509	-2.87518	Sensitive
													PP-2	IC50	GPAT4	3.12426	0.0192935	1.10835	0.0693157	1.03903	Resistant
													PP-2	IC50	JPH1	6.94671	0.000446063	0.863607	-0.538361	1.40197	Resistant
													PP-2	IC50	ERLN2	5.75295	0.00079243	1.09043	-0.552199	1.64263	Resistant
													PP-2	IC50	SMUF1	8.43187	0.00162901	0.659432	-0.380345	1.03978	Resistant
													PP-2	IC50	IFIT2	-3.65427	0.0114751	-0.778905	2.0526	-2.8315	Sensitive
													PP-2	IC50	IFIT1	-3.38753	0.0125046	-0.700653	2.39174	-3.09239	Sensitive
													PP-2	IC50	UBE2T	5.6317	0.000994036	1.27863	-0.0945903	1.37322	Resistant
													PP-2	IC50	HTRA1	-4.70454	0.00356072	-0.83805	1.30105	-2.1391	Sensitive
													PP-2	IC50	KAT6A	4.35701	0.00357808	0.762683	-0.326805	1.08949	Resistant
													PP-2	IC50	SNTB1	-3.65828	0.0193929	-1.66072	-0.186261	-1.47446	Sensitive
													PP-2	IC50	UBA7	-4.82756	0.0155575	-0.846816	0.680181	-1.527	Sensitive
													PP-2	IC50	P4HA1	-3.03041	0.0311524	-0.342347	1.06767	-1.41002	Sensitive
													PP-2	IC50	ACADS	-3.0282	0.0191652	-1.71505	0.245627	-1.96068	Sensitive
													PP-2	IC50	PML	-3.87647	0.00635432	-0.77756	0.402601	-1.18016	Sensitive
													PP-2	IC50	5NTD	-2.97416	0.0208484	-1.24358	0.636172	-1.87975	Sensitive
													PP-2	IC50	SE1L3	-7.29103	0.00763323	-1.35119	-0.340785	-1.01041	Sensitive
													PP-2	IC50	GBP3	-3.67808	0.0189338	-0.796645	2.23099	-3.02763	Sensitive
													PP-2	IC50	GBP1	-3.21721	0.0268592	-0.30193	2.32683	-2.62876	Sensitive
													PP-2	IC50	PLOD1	-3.29122	0.0224697	-0.81283	0.85673	-1.66956	Sensitive
													PP-2	IC50	RHG04	2.90782	0.0275869	0.359191	-0.711924	1.07111	Resistant
													PP-2	IC50	NF1	2.86805	0.0308573	0.169444	-0.971164	1.14061	Resistant
													PP-2	IC50	RASA3	-2.74218	0.0295985	-0.731103	0.465803	-1.19691	Sensitive
													PP-2	IC50	CANT1	2.73292	0.0292157	0.980448	-0.199714	1.18016	Resistant
													PP-2	IC50	FADS1	-2.53868	0.0402141	-0.757136	0.405552	-1.16269	Sensitive
													PP-2	IC50	LANC1	3.02648	0.0194711	0.58499	-0.479452	1.06444	Resistant
													PP-2	IC50	DDX58	-3.55969	0.0140201	-0.230576	1.70488	-1.93546	Sensitive
													PP-2	IC50	PSB9	-2.65818	0.032557	-1.12357	0.474466	-1.59803	Sensitive
													PP-2	IC50	SQSTM	-3.25937	0.0152265	-0.322939	1.69949	-2.02243	Sensitive
													PP-2	IC50	KPCD3	-11.4599	0.00171212	-0.300407	0.727647	-1.02805	Sensitive
													PP-2	IC50	IKKB	2.83445	0.0254652	1.49296	-0.0364469	1.5294	Resistant
													PP-2	IC50	ANKK1	4.13984	0.0144985	-0.20613	-1.22375	1.01762	Resistant
													PP-2	IC50	CQ062	3.23744	0.0158847	0.943717	-0.244638	1.18836	Resistant
													PP-2	IC50	CO6A1	-3.9621	0.0152928	-0.994871	0.930094	-1.92497	Sensitive
													PP-2	IC50	MPP7	2.45551	0.0440409	1.79957	0.0760814	1.72348	Resistant
													PP-2	IC50	PPM1H	2.65693	0.0334973	1.59704	-0.0910449	1.68808	Resistant
													PP-2	IC50	PROSC	5.21664	0.00157414	1.16267	-0.714127	1.8768	Resistant
													PP-2	IC50	GATA2	12.2408	0.0275223	2.97769	-0.922977	3.90066	Resistant
													PP-2	IC50	TSR2	4.10978	0.00471041	0.925059	-0.106311	1.03137	Resistant
													PP-2	IC50	RTEL1	-3.03706	0.0323912	-0.558836	0.697292	-1.25613	Sensitive
													PP-2	IC50	TAP2	-2.40715	0.0483012	-0.472391	0.691242	-1.16363	Sensitive
													PP-2	IC50	PURA2	2.92879	0.023982	0.649344	-0.381331	1.03067	Resistant
													PP-2	IC50	PSB8	-3.4414	0.0140034	-0.927053	0.421841	-1.34889	Sensitive
													PP-2	IC50	ABC3F	-2.98868	0.04613	-1.8609	0.836675	-2.69757	Sensitive
													PP-2	IC50	CASPA	-5.55873	0.0177751	-1.14894	0.282376	-1.43131	Sensitive
													PP-2	IC50	SODM	-2.97043	0.0359177	-1.27302	0.774116	-2.04714	Sensitive
													PP-2	IC50	IF16	-3.62434	0.00973687	-1.57149	0.0356994	-1.60719	Sensitive
													PP-2	IC50	CXAR	-2.78285	0.0272117	-1.07265	0.104274	-1.17692	Sensitive
													PP-2	IC50	C1R	-3.81662	0.0124505	-1.409	2.28908	-3.69807	Sensitive
													PP-2	IC50	SHPS1	-2.68704	0.0423947	-1.30765	0.854259	-2.16191	Sensitive
													PP-2	IC50	ENSA	2.51087	0.0412356	1.09237	-0.415058	1.50743	Resistant
													PP-2	IC50	IBP3	-2.79411	0.0314335	-0.972279	0.543482	-1.51576	Sensitive
													PP-2	IC50	SPIR1	2.63532	0.0389102	0.947054	-0.962311	1.90936	Resistant
													PP-2	IC50	P4HA2	-2.73632	0.0295115	-0.367005	0.924668	-1.29167	Sensitive
													PP-2	IC50	EFTS	3.12899	0.0203472	1.55317	-0.253921	1.8071	Resistant
													PP-2	IC50	B4E1Z4	-3.15494	0.0330462	-0.154182	2.34036	-2.49454	Sensitive
													PP-2	IC50	TPSN	-2.513	0.0406749	-0.476076	0.85583	-1.33191	Sensitive
													PP-2	IC50	PROF2	3.11051	0.0187741	1.04741	-0.836935	1.88434	Resistant
													PP-2	IC50	CAPG	-3.0181	0.0196013	-0.161759	1.16816	-1.32992	Sensitive
													PP-2	IC50	SH3K1	-2.51585	0.0406009	-1.18173	0.181059	-1.36279	Sensitive
													PP-2	IC50	MOSC2	2.83209	0.0259382	1.01385	-0.39245	1.4063	Resistant
													PP-2	IC50	HMCS1	2.67573	0.0435762	1.07533	-0.19023	1.26556	Resistant
													PP-2	IC50	INGR1	-2.46157	0.049119	-0.476876	0.780082	-1.25696	Sensitive
													PP-2	IC50	AAMP	5.85266	0.000776792	0.809047	-0.195279	1.00433	Resistant
													PP-2	IC50	CS066	-4.13385	0.00447046	-0.945893	0.410644	-1.35654	Sensitive
													PP-2	IC50	RIR1	4.20809	0.00710856	1.1406	0.0125766	1.12802	Resistant
													PP-2	IC50	MICB	6.04351	0.0139654	2.06405	0.792775	1.27127	Resistant
													PP-2	IC50	TPD52	3.00859	0.0198675	0.837695	-0.400059	1.23775	Resistant
													PP-2	IC50	GAPR1	-2.59574	0.0361935	-1.76558	0.456815	-2.22239	Sensitive
													PP-2	IC50	EXT1	-4.44173	0.0414945	-0.698601	0.723858	-1.42246	Sensitive
													PP-2	IC50	LPXN	-2.67858	0.0438487	-1.41867	-0.31075	-1.10792	Sensitive
													PP-2	IC50	ICAM1	-3.01582	0.0219403	-1.26024	1.19124	-2.45148	Sensitive
													PP-2	IC50	ST17A	-4.45413	0.0212995	-0.256356	1.11349	-1.36985	Sensitive
													PP-2	IC50	PLCD1	-2.62443	0.0371868	-0.370208	0.703612	-1.07382	Sensitive
													PP-2	IC50	PSB10	-2.77263	0.0339604	-1.41223	0.614766	-2.027	Sensitive
													PP-2	IC50	DEST	2.45954	0.0464555	1.19356	0.0589838	1.13458	Resistant
													PP-2	IC50	E2AK2	-5.12101	0.00202385	-0.545997	0.473877	-1.01987	Sensitive
													PP-2	IC50	HERC5	-2.85959	0.0415399	-0.124694	1.44418	-1.56887	Sensitive
													PP-2	IC50	NB5R2	3.26626	0.0177652	1.26561	-0.86408	2.12969	Resistant
													PP-2	IC50	FMO5	3.98934	0.0444093	-0.0242221	-1.53528	1.51105	Resistant
													PP-2	IC50	ISG15	-7.43588	0.000162909	-0.65884	2.07279	-2.73163	Sensitive
													PP-2	IC50	GALC	-2.5809	0.0418438	-0.795862	0.90748	-1.70334	Sensitive
													PP-2	IC50	PI42C	3.42248	0.022112	1.81469	0.00855026	1.80614	Resistant
													PP-2	IC50	TGFR2	-3.42621	0.0200844	-0.957702	0.297412	-1.25511	Sensitive
													PP-2	IC50	FRS2	9.32929	0.00261291	2.90047	-0.0600647	2.96054	Resistant
													PP-2	IC50	NMI	-4.25059	0.0102436	-0.578131	1.04348	-1.62161	Sensitive
													PP-2	IC50	PRR3	4.89606	0.0246364	-0.113649	-1.28627	1.17262	Resistant
													PP-2	IC50	CO5A1	-5.08451	0.00328256	-0.414174	1.80391	-2.21809	Sensitive
													PP-2	IC50	SH3L1	2.62386	0.0383398	1.36005	-0.472342	1.83239	Resistant
													PP-2	IC50	STAT1	-3.00371	0.0229193	0.0970706	1.13903	-1.04196	Sensitive
													PP-2	IC50	IN35	-3.45891	0.0133591	-0.474332	1.06851	-1.54284	Sensitive
													PP-2	IC50	ECHD1	-2.80071	0.0270924	-1.28785	0.0593256	-1.34717	Sensitive
													PP-2	IC50	CGNL1	3.54483	0.0114823	0.942347	-0.474556	1.4169	Resistant
													PP-2	IC50	CDN1B	2.474	0.0487803	1.32588	0.147492	1.17838	Resistant
													PP-2	IC50	TCAL3	2.91323	0.0435553	2.59052	0.0201824	2.57033	Resistant
													PP-2	IC50	DUOX1	-5.47698	0.0388481	-0.538644	1.77185	-2.3105	Sensitive
													PP-2	IC50	IPKG	6.85217	0.0262827	1.08187	-0.236863	1.31874	Resistant
													PP-2	IC50	IRF9	-2.76642	0.0283909	-0.0568086	1.17561	-1.23242	Sensitive
													PP-2	IC50	IFM3	-3.14155	0.0498343	-1.31534	1.05214	-2.36748	Sensitive
													PP-2	IC50	OAS1	-2.87715	0.0341994	-1.32949	0.881027	-2.21052	Sensitive
													PP-2	IC50	EFNA1	6.20095	0.00879819	1.45445	-0.561398	2.01585	Resistant
													PP-2	IC50	CERS4	-2.80018	0.039091	-0.357757	0.778397	-1.13615	Sensitive
													PP-2	IC50	RN170	2.73057	0.0401755	0.789592	-0.22668	1.01627	Resistant
													PP-2	IC50	GLYG	2.77754	0.0407399	1.05787	-0.117178	1.17505	Resistant
													PP-2	IC50	AKTIP	4.86762	0.00412413	1.11403	0.0691422	1.04488	Resistant
													PP-2	IC50	LEGL	2.45184	0.0459186	0.48527	-0.679255	1.16453	Resistant
													PP-2	IC50	CV039	5.56612	0.0203756	1.32359	0.214516	1.10908	Resistant
													PP-2	IC50	CHMP6	3.52032	0.0112383	0.830191	-0.170529	1.00072	Resistant
													PP-2	IC50	E7ESS2	-4.4646	0.00911051	-0.276658	0.8907	-1.16736	Sensitive
													PP-2	LN_EC50	SHIP2	14.4217	0.000701913	0.845192	-1.7813	2.62649	Resistant
													PP-2	LN_EC50	TXLNA	4.38285	0.040171	0.664262	-0.614895	1.27916	Resistant
													PP-2	LN_EC50	RM11	-13.0767	0.000618238	-0.363763	0.822058	-1.18582	Sensitive
													PP-2	LN_EC50	DHB8	-8.37534	0.00133142	-0.167289	1.42787	-1.59515	Sensitive
													PP-2	LN_EC50	PALM	-3.94881	0.0311007	0.152411	1.74876	-1.59635	Sensitive
													PP-2	LN_EC50	K6PP	3.7293	0.0333575	0.682179	-0.618946	1.30113	Resistant
													PP-2	LN_EC50	PLSI	4.4934	0.0202207	0.586587	-0.674806	1.26139	Resistant
													PP-2	LN_EC50	TPM1	3.46295	0.0257603	0.948398	-1.40485	2.35325	Resistant
													PP-2	LN_EC50	IDI1	4.67941	0.0095318	0.655267	-0.467636	1.1229	Resistant
													PP-2	LN_EC50	TP53B	-6.41571	0.00314473	-0.110283	0.938565	-1.04885	Sensitive
													PP-2	LN_EC50	TSN31	4.25262	0.0140442	2.60346	-0.0687819	2.67224	Resistant
													PP-2	LN_EC50	PDIA5	-2.99415	0.0473374	-0.764277	0.368686	-1.13296	Sensitive
													PP-2	LN_EC50	LAMA3	-4.70148	0.0115734	-0.604629	0.837888	-1.44252	Sensitive
													PP-2	LN_EC50	HAUS1	5.01301	0.0373247	0.140132	-0.889845	1.02998	Resistant
													PP-2	LN_EC50	RBM28	-3.66085	0.0221767	-0.650092	0.457304	-1.1074	Sensitive
													PP-2	LN_EC50	RTF2	6.45518	0.00296823	0.529667	-0.571347	1.10101	Resistant
													PP-2	LN_EC50	COQ5	-3.58736	0.0302471	-0.604499	0.401312	-1.00581	Sensitive
													PP-2	LN_EC50	TREF1	-6.62456	0.0214136	-0.00235374	1.39689	-1.39924	Sensitive
													PP-2	LN_EC50	EF1A3	4.34564	0.0294511	0.196149	-0.862807	1.05896	Resistant
													PP-2	LN_EC50	DEOC	4.50102	0.0276058	1.36922	-0.320475	1.68969	Resistant
													PP-2	LN_EC50	K2013	-2.99476	0.0455317	-0.275948	0.829266	-1.10521	Sensitive
													PP-2	LN_EC50	TMA7	6.60239	0.0462833	0.897784	-1.68268	2.58047	Resistant
													PP-2	LN_EC50	CF132	-2.88617	0.0448388	0.185115	1.7869	-1.60179	Sensitive
													PP-2	LN_EC50	NOL12	-4.74443	0.0106946	-0.728006	0.395347	-1.12335	Sensitive
													PP-2	LN_EC50	NAA40	7.29906	0.0141403	0.316614	-0.796029	1.11264	Resistant
													PP-2	LN_EC50	ROBO1	3.00755	0.0498395	0.450465	-0.941411	1.39188	Resistant
													PP-2	LN_EC50	CASP	-8.91809	0.0026998	-0.227332	0.881303	-1.10864	Sensitive
													PP-2	LN_EC50	RECQ1	5.37958	0.00947939	0.699963	-0.888432	1.5884	Resistant
													PP-2	LN_EC50	CLCN2	-7.96333	0.0153205	-0.300166	1.13505	-1.43522	Sensitive
													PP-2	LN_EC50	GPTC2	3.92158	0.0174382	1.17025	-0.0428397	1.21309	Resistant
													PP-2	LN_EC50	1A25	-3.29319	0.045844	-1.76649	0.356611	-2.1231	Sensitive
													PP-2	LN_EC50	BRWD1	-5.27284	0.00907773	-0.248631	1.03796	-1.28659	Sensitive
													PP-2	LN_EC50	DPP2	-3.37769	0.0296124	0.0953897	1.35049	-1.2551	Sensitive
													PP-2	LN_EC50	STRAP	25.2742	9.24748e-05	0.617586	-0.594288	1.21187	Resistant
													PP-2	LN_EC50	SERPH	-3.54897	0.0251123	-0.216716	0.867883	-1.0846	Sensitive
													PP-2	LN_EC50	B2L13	-11.1649	0.00357718	-0.744027	0.675646	-1.41967	Sensitive
													PP-2	LN_EC50	ASGL1	5.28314	0.0134843	-0.873087	-3.67831	2.80522	Resistant
													PP-2	LN_EC50	BGH3	-3.80665	0.0226133	-1.19905	0.637278	-1.83632	Sensitive
													PP-2	LN_EC50	RAB3I	5.18057	0.0102136	1.72644	-1.32613	3.05257	Resistant
													PP-2	LN_EC50	SWP70	10.4436	0.000951401	0.541614	-0.550889	1.0925	Resistant
													PP-2	LN_EC50	H3BRJ5	-3.64818	0.0388964	-0.0932704	1.14104	-1.23431	Sensitive
													PP-2	LN_EC50	HS71L	-4.32319	0.0173825	-0.450356	0.628075	-1.07843	Sensitive
													PP-2	LN_EC50	PKN2	5.6561	0.00621734	0.269732	-0.751747	1.02148	Resistant
													PP-2	LN_EC50	ENOG	3.49563	0.0341586	0.474922	-1.52613	2.00105	Resistant
													PP-2	LN_EC50	XPP3	-3.82733	0.0308422	-0.105408	1.03187	-1.13728	Sensitive
													PP-2	LN_EC50	CH082	-10.2396	0.00173519	-0.0970636	1.13913	-1.2362	Sensitive
													PP-2	LN_EC50	2023-09-11	4.75188	0.0369628	0.223145	-0.805958	1.0291	Resistant
													PP-2	LN_EC50	UBE2T	12.7407	0.000304549	1.27863	-0.83587	2.1145	Resistant
													PP-2	LN_EC50	RASF2	6.55828	0.00879062	-0.653683	-1.73276	1.07908	Resistant
													PP-2	LN_EC50	SQRD	-5.46573	0.00561863	-0.231732	2.2347	-2.46643	Sensitive
													PP-2	LN_EC50	PUS3	5.56154	0.0201935	0.409543	-0.695698	1.10524	Resistant
													PP-2	LN_EC50	NF2IP	4.27021	0.0217317	0.814882	-0.644003	1.45888	Resistant
													PP-2	LN_EC50	EHD3	4.48954	0.0174731	0.802234	-0.848815	1.65105	Resistant
													PP-2	LN_EC50	EHD1	5.92147	0.0294991	1.16293	-0.345196	1.50812	Resistant
													PP-2	LN_EC50	PGM1	9.36869	0.0374334	0.0839472	-1.71839	1.80233	Resistant
													PP-2	LN_EC50	GWL	5.24447	0.0421811	0.386634	-1.39579	1.78242	Resistant
													PP-2	LN_EC50	NCS1	5.01278	0.0107505	0.532759	-0.650165	1.18292	Resistant
													PP-2	LN_EC50	ROCK1	6.47666	0.00746779	0.421546	-1.10567	1.52721	Resistant
													PP-2	LN_EC50	CAN2	3.89324	0.0278183	1.22679	-2.22874	3.45554	Resistant
													PP-2	LN_EC50	ASH1L	-8.37387	0.00579289	-0.367837	0.668244	-1.03608	Sensitive
													PP-2	LN_EC50	RGS19	-10.1731	0.0323174	-0.31647	0.704342	-1.02081	Sensitive
													PP-2	LN_EC50	SARG	-8.17325	0.00440499	-1.69224	1.10109	-2.79333	Sensitive
													PP-2	LN_EC50	TYSY	3.56037	0.0332205	0.476782	-1.02669	1.50347	Resistant
													PP-2	LN_EC50	RMD3	-4.41742	0.0194336	-0.348278	0.769504	-1.11778	Sensitive
													PP-2	LN_EC50	H0Y2W2	-3.57634	0.024882	-0.729084	0.321815	-1.0509	Sensitive
													PP-2	LN_EC50	LZTL1	3.83433	0.0419594	0.263078	-0.832456	1.09553	Resistant
													PP-2	LN_EC50	SKT	-5.61056	0.00518273	-0.343129	1.6875	-2.03063	Sensitive
													PP-2	LN_EC50	TPD54	6.16501	0.00504376	0.367869	-0.914578	1.28245	Resistant
													PP-2	LN_EC50	WDR6	3.01765	0.0398906	0.527282	-0.753721	1.281	Resistant
													PP-2	LN_EC50	SIGIR	-4.71709	0.0252449	-0.379426	2.31428	-2.69371	Sensitive
													PP-2	LN_EC50	SH24A	3.07463	0.0422731	0.764076	-1.17569	1.93976	Resistant
													PP-2	LN_EC50	SPAG5	5.44325	0.0195132	0.593965	-0.685815	1.27978	Resistant
													PP-2	LN_EC50	AMD	3.84101	0.0249228	0.625937	-1.0908	1.71674	Resistant
													PP-2	LN_EC50	TACC3	4.3906	0.0123231	0.687034	-0.924582	1.61162	Resistant
													PP-2	LN_EC50	SCRIB	-4.05891	0.0153907	-0.361762	0.86953	-1.23129	Sensitive
													PP-2	LN_EC50	HIBCH	-4.40177	0.0187307	-0.279517	0.723581	-1.0031	Sensitive
													PP-2	LN_EC50	QCR9	-10.2452	0.00123916	0.0199323	1.21183	-1.1919	Sensitive
													PP-2	LN_EC50	ACY1	2.91156	0.0478859	0.142395	-1.10697	1.24936	Resistant
													PP-2	LN_EC50	GALT3	-3.45337	0.0405619	0.317091	1.79515	-1.47806	Sensitive
													PP-2	LN_EC50	FADS2	-4.84204	0.0165481	-0.69824	1.27183	-1.97007	Sensitive
													PP-2	LN_EC50	ORNT1	-6.58211	0.023943	-0.436288	0.580411	-1.0167	Sensitive
													PP-2	LN_EC50	SL9A1	-4.58578	0.0116465	0.012832	1.58129	-1.56846	Sensitive
													PP-2	LN_EC50	RHG18	3.69992	0.034202	0.83663	-1.12872	1.96535	Resistant
													PP-2	LN_EC50	TFB1M	-5.79873	0.00806835	-0.738058	0.365712	-1.10377	Sensitive
													PP-2	LN_EC50	ELOA1	-8.26721	0.00318799	-0.319697	0.690211	-1.00991	Sensitive
													PP-2	LN_EC50	TOPK	12.1732	0.000538493	0.973129	-1.4566	2.42973	Resistant
													PP-2	LN_EC50	FKB10	3.25486	0.0418121	0.56366	-1.14304	1.7067	Resistant
													PP-2	LN_EC50	MLTK	3.1425	0.0439603	0.216155	-0.909367	1.12552	Resistant
													PP-2	LN_EC50	DNM3A	-9.73042	0.00482126	-0.546733	1.13253	-1.67926	Sensitive
													PP-2	LN_EC50	LIAS	-4.17434	0.0157992	-0.605519	0.585867	-1.19139	Sensitive
													PP-2	LN_EC50	CDK1	14.5537	0.0001879	1.01258	-0.359443	1.37202	Resistant
													PP-2	LN_EC50	CDK3	19.2766	0.000399974	0.668214	-0.440853	1.10907	Resistant
													PP-2	LN_EC50	SRXN1	3.43442	0.0427995	0.0976917	-0.935828	1.03352	Resistant
													PP-2	LN_EC50	CHAC2	3.21837	0.0341887	0.486836	-1.49855	1.98539	Resistant
													PP-2	LN_EC50	IRF3	2.92765	0.0494907	1.04522	-0.0181883	1.0634	Resistant
													PP-2	LN_EC50	VWA8	-8.36675	0.00268879	-0.697203	1.2358	-1.933	Sensitive
													PP-2	LN_EC50	PURA2	3.70561	0.0233231	0.649344	-0.579759	1.2291	Resistant
													PP-2	LN_EC50	SNP23	-3.69374	0.034372	-0.24052	0.981451	-1.22197	Sensitive
													PP-2	LN_EC50	RM30	-13.0627	0.000645076	-0.307158	0.697987	-1.00514	Sensitive
													PP-2	LN_EC50	SGTB	4.54008	0.0145397	0.100574	-1.33619	1.43676	Resistant
													PP-2	LN_EC50	TTPAL	3.6396	0.0409985	0.596001	-0.647863	1.24386	Resistant
													PP-2	LN_EC50	FA50A	10.8504	0.000770816	0.371621	-0.96797	1.33959	Resistant
[truncated: 226 more rows]

## Sheet: saracatinib
The drug sensitivity results for saracatinib in mRNA level.										The drug sensitivity results for saracatinib in protein level.
[truncated: 526 more rows]

[truncated: 1 more sheets: ZM-306416]
